# Supplementary material for: Polysulfurating reagent design for unsymmetrical polysulfide construction
Source: Nat Commun. 2018 Jun 6;9:2191. doi: 10.1038/s41467-018-04306-5 (PMC5989225; doi:10.1038/s41467-018-04306-5)
Supplement: Supplementary file 1 — Supplementary Information [file 41467_2018_4306_MOESM1_ESM.pdf]

Supporting Information

# **Polysulfurating Reagents Design for Unsymmetrical Polysulfides**

## **Construction**

Xiao et al.

## Supplementary Methods

### General information

All experiments were conducted under air atmosphere unless otherwise noted. Anhydrous  $\text{CH}_2\text{ClCH}_2\text{Cl}$  was prepared by first distillation over  $\text{P}_2\text{O}_5$  and then from  $\text{CaH}_2$ . Toluene and THF were prepared by distillation over sodium-benzophenone ketyl prior to use. Other solvents were undried solvents.  $^1\text{H}$  and  $^{13}\text{C}$  NMR spectra were collected on 400 MHz or 500 MHz NMR spectrometers (Bruker AVANCE) using  $\text{CDCl}_3$  or  $\text{DMSO-d}_6$ . Chemical shifts are reported in parts per million (ppm). Chemical shifts for protons are reported in parts per million downfield and are referenced to residual protium in the NMR solvent ( $\text{CHCl}_3 = \delta$  7.26,  $\text{DMSO} = \delta$  2.50). Chemical shifts for carbon are reported in parts per million downfield and are referenced to the carbon resonances of the solvent ( $\text{CDCl}_3 = \delta$  77.0,  $\text{DMSO} = \delta$  39.5). Data are represented as follows: chemical shift, multiplicity (br = broad, s = singlet, d = doublet, t = triplet, q = quartet, m = multiplet), coupling constants in Hertz (Hz), integration. Unless otherwise noted, commercially available reagents purchased from Adamas-beta, TCI, or Energy Chemical and were used as received.

### Mass spectroscopy:

Mass spectra were in general recorded on a Shimadzu GCMS-QP2010 Ultra and a HP 5989A mass selective detector.

### Chromatography:

Column chromatography was performed with silica gel (200-300 mesh ASTM).

### IR:

TENSOR (27) Series FT-IR Spectrometers.

## Optimization of disulfurating reagents and gram scale reaction for disulfurating reagents synthese

**Supplementary Table 1.** Optimization of disulfurating reagents.

NCc1ccc(CS(=O)C)cc1 **1d**
 $\xrightarrow[\text{MeOH, temp., time}]{\text{CuSO}_4 \cdot 5\text{H}_2\text{O, Ligand, Li}_2\text{CO}_3 \text{ (1 equiv.)}, \text{PhI(OPiv)}_2}$ 
NCc1ccc(CS(=O)C)cc1 **2d**

| Entry          | CuSO <sub>4</sub><br>(mol%) | Ligand<br>(mol%) | PhI(OPiv) <sub>2</sub><br>(equiv.) | Temp.<br>(°C) | Time<br>(h) | Yield<br>(% <sup>b</sup> ) |
|----------------|-----------------------------|------------------|------------------------------------|---------------|-------------|----------------------------|
| 1 <sup>c</sup> | 10                          | bpy (10)         | 2.5                                | 25            | 11          | 31                         |
| 2 <sup>d</sup> | 10                          | bpy (10)         | 2.5                                | 25            | 11          | ND                         |
| 3              | 10                          | bpy/ phen (10)   | 2.5                                | 25            | 11          | 50/ 53                     |
| 4              | 10                          | L1 (10)          | 2.5                                | 25            | 11          | 77                         |
| 5              | 10                          | L2/ L3/ L4 (10)  | 2.5                                | 25            | 11          | 70/ 63/ 68                 |
| 6              | 10                          | L1 (10)          | 2.5                                | 20            | 13          | 86                         |
| 7              | 5                           | L1 (10)          | 2.5                                | 20            | 13          | 86                         |
| 8              | 2.5                         | L1 (10)          | 2.5                                | 20            | 13          | 79                         |
| 9              | 5                           | L1 (5)           | 2.5                                | 20            | 13          | 76                         |
| <b>10</b>      | <b>5</b>                    | <b>L1 (10)</b>   | <b>2.2</b>                         | <b>20</b>     | <b>13</b>   | <b>88</b>                  |
| 11             | 5                           | L1 (10)          | 1.9                                | 20            | 13          | 65                         |

**L1**      **L2**      **L3**      **L4**

<sup>a</sup>Conditions: **1d** (0.2 mmol, 1 equiv.), CuSO<sub>4</sub>·5H<sub>2</sub>O, Ligand, Li<sub>2</sub>CO<sub>3</sub> and PhI(OPiv)<sub>2</sub> were added to MeOH (2 mL) at 20 °C for 13 h. <sup>b</sup>Isolated yeild. <sup>c</sup>PhI(OAc)<sub>2</sub> was instead of PhI(OPiv)<sub>2</sub>. <sup>d</sup>PhI(OTFA)<sub>2</sub> was instead of PhI(OPiv)<sub>2</sub>.

To a Schlenk tube were added 4-CNC<sub>6</sub>H<sub>4</sub>CH<sub>2</sub>SSAc (**1d**) (0.2 mmol, 1 equivalent, 44.7 mg), CuSO<sub>4</sub>·5H<sub>2</sub>O, Ligand, Li<sub>2</sub>CO<sub>3</sub> (0.2 mmol, 1 equivalent, 14.8 mg), oxidant, and undistilled MeOH (2 mL), the mixture was stirred at 20 °C before it was concentrated under vacuum. Purification by column chromatography afforded the desired product.

**Supplementary Table 2.** Optimization of gram scale reaction for disulfurating reagents synthesis.

| <div style="display: flex; align-items: center; justify-content: space-around;"> <div style="text-align: center;"> 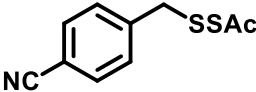 <p><b>1d</b> (5 mmol, 1.12 g)</p> </div> <div style="text-align: center;"> <math>\xrightarrow[\text{Li}_2\text{CO}_3, \text{PhI(OPiv)}_2, \text{MeOH}, 20\text{ }^\circ\text{C}, 15\text{ h}]{\text{CuSO}_4\cdot 5\text{H}_2\text{O} (x\text{ mol}\%), 4,7\text{-di-Ph-1,10-Phen} (y\text{ mol}\%)}</math> </div> <div style="text-align: center;"> 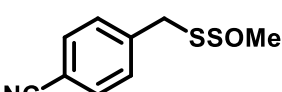 <p><b>2d</b></p> </div> </div> |                            |                  |                                    |              |             |                           |
|-----------------------------------------------------------------------------------------------------------------------------------------------------------------------------------------------------------------------------------------------------------------------------------------------------------------------------------------------------------------------------------------------------------------------------------------------------------------------------------------------------------------------------------------------------------------------------------------------------------------------------------------------------------------------------|----------------------------|------------------|------------------------------------|--------------|-------------|---------------------------|
| Entry                                                                                                                                                                                                                                                                                                                                                                                                                                                                                                                                                                                                                                                                       | CuSO <sub>4</sub><br>/mol% | Ligand<br>/ mol% | PhI(OPiv) <sub>2</sub><br>/ equiv. | MeOH<br>/ mL | time<br>/ h | yeild<br>/ % <sup>b</sup> |
| 1                                                                                                                                                                                                                                                                                                                                                                                                                                                                                                                                                                                                                                                                           | 5                          | 10               | 2.2                                | 50           | 13          | 86                        |
| 2                                                                                                                                                                                                                                                                                                                                                                                                                                                                                                                                                                                                                                                                           | 5                          | 6                | 2.2                                | 50           | 13          | 84                        |
| 3                                                                                                                                                                                                                                                                                                                                                                                                                                                                                                                                                                                                                                                                           | 5                          | 6                | 1.7                                | 50           | 13          | 56                        |
| 4                                                                                                                                                                                                                                                                                                                                                                                                                                                                                                                                                                                                                                                                           | 2.5                        | 6                | 2.2                                | 50           | 13          | 77                        |
| 5                                                                                                                                                                                                                                                                                                                                                                                                                                                                                                                                                                                                                                                                           | 2.5                        | 6                | 2.2                                | 35           | 13          | 81                        |
| 6                                                                                                                                                                                                                                                                                                                                                                                                                                                                                                                                                                                                                                                                           | 1                          | 2                | 2.2                                | 35           | 13          | 76                        |
| 7                                                                                                                                                                                                                                                                                                                                                                                                                                                                                                                                                                                                                                                                           | 1                          | 2                | 2.2                                | 20           | 14          | 88                        |
| 8                                                                                                                                                                                                                                                                                                                                                                                                                                                                                                                                                                                                                                                                           | 0.5                        | 1                | 2.2                                | 20           | 14          | 83                        |
| 9                                                                                                                                                                                                                                                                                                                                                                                                                                                                                                                                                                                                                                                                           | 0.5                        | 1                | 2.2                                | 10           | 15          | 86                        |
| <b>10</b>                                                                                                                                                                                                                                                                                                                                                                                                                                                                                                                                                                                                                                                                   | <b>0.25</b>                | <b>0.5</b>       | <b>2.2</b>                         | <b>10</b>    | <b>15</b>   | <b>87</b>                 |
| 11 <sup>c</sup>                                                                                                                                                                                                                                                                                                                                                                                                                                                                                                                                                                                                                                                             | 0.25                       | 0.5              | 2.2                                | 10           | 15          | 87                        |
| 12 <sup>c</sup>                                                                                                                                                                                                                                                                                                                                                                                                                                                                                                                                                                                                                                                             | 0.125                      | 0.25             | 2.2                                | 10           | 15          | 80                        |

<sup>a</sup>Conditions: **1d** (5 mmol, 1 equiv.), CuSO<sub>4</sub>·5H<sub>2</sub>O, **L1**, Li<sub>2</sub>CO<sub>3</sub> (5 mmol, 1 equiv.) and PhI(OPiv)<sub>2</sub> (11 mmol, 2.2 equiv.) were added to MeOH at 20 °C. <sup>b</sup>Isolated yeild. <sup>c</sup>**1d** (10 mmol, 1 equiv.).

To a Schlenk tube were added 4-CNC<sub>6</sub>H<sub>4</sub>CH<sub>2</sub>SSAc (**1e**) (5 mmol, 1 equivalent, 1.12 g), CuSO<sub>4</sub>·5H<sub>2</sub>O, **L1**, Li<sub>2</sub>CO<sub>3</sub> (5 mmol, 1 equivalent, 370 mg), PhI(OPiv)<sub>2</sub>, and undistilled MeOH (2 mL), the mixture was stirred at 20 °C for 13-15 hours. The mixture was quenched by saturated NaHCO<sub>3</sub> and extracted by DCM before the organic phase was concentrated under vacuum without adding silica gel. Purification by column chromatography afforded the desired product.

## General procedure and spectra data of disulfurating reagents

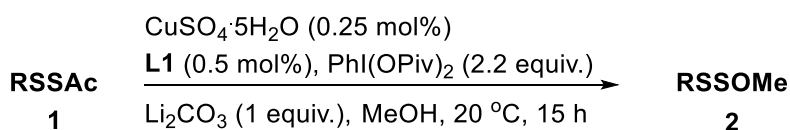

**General procedure:** To a Schlenk tube were added RSSAc **1**<sup>[1]</sup> (5 mmol, 1 equivalent), CuSO<sub>4</sub>·5H<sub>2</sub>O (0.0125 mmol, 0.25 mol%, 3.2 mg), **L1** (0.025 mmol, 0.5 mol%, 8.1 mg), Li<sub>2</sub>CO<sub>3</sub> (5 mmol, 1 equivalent, 370 mg), PhI(OPiv)<sub>2</sub><sup>[2-3]</sup> (11 mmol, 2.2 equivalents, 4.47 g), and undistilled MeOH (10 mL), the mixture was stirred at 20 °C for 15 hours. The mixture was quenched by saturated NaHCO<sub>3</sub> and extracted by DCM before the organic phase was concentrated under vacuum without adding silica gel. Purification by column chromatography afforded the desired product.

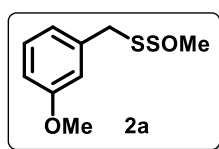

The reaction of 3-MeOC<sub>6</sub>H<sub>4</sub>CH<sub>2</sub>SSAc (5 mmol, 1 equivalent, 1.14 g), CuSO<sub>4</sub>·5H<sub>2</sub>O (0.0125 mmol, 0.25 mol%, 3.2 mg), **L1** (0.025 mmol, 0.5 mol%, 8.1 mg), Li<sub>2</sub>CO<sub>3</sub> (5 mmol, 1 equivalent, 370 mg), and PhI(OPiv)<sub>2</sub> (11 mmol, 2.2 equivalents, 4.47 g) in MeOH (10 mL) at 20 °C for 15 hours afforded compound **2a** in 54% yield (590 mg) as a colorless oil according to the general procedure. <sup>1</sup>H NMR (400 MHz, CDCl<sub>3</sub>) δ 7.25-7.18 (m, 1H), 6.94-6.84 (m, 2H), 6.82 (dd, *J* = 8.2, 2.0 Hz, 1H), 4.14 (s, 2H), 3.80 (s, 3H), 3.58 (s, 3H). <sup>13</sup>C NMR (100 MHz, CDCl<sub>3</sub>) δ 159.8, 138.2, 129.6, 121.6, 114.7, 113.2, 62.7, 62.6, 55.2, 55.2, 46.7. IR (film) 2973, 2913, 1599, 1489, 1435, 1263, 1152, 1051, 982, 872, 781, 672. HRMS (EI) Calcd for C<sub>9</sub>H<sub>12</sub>O<sub>2</sub>S<sub>2</sub> 216.0279, Found 216.0283.

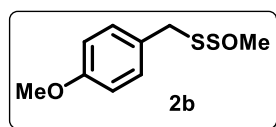

The reaction of 4-MeOC<sub>6</sub>H<sub>4</sub>CH<sub>2</sub>SSAc (5 mmol, 1 equivalent, 1.14 g), CuSO<sub>4</sub>·5H<sub>2</sub>O (0.0125 mmol, 0.25 mol%, 3.2 mg), **L1** (0.025 mmol, 0.5 mol%, 8.1 mg), Li<sub>2</sub>CO<sub>3</sub> (5 mmol, 1 equivalent, 370 mg), and PhI(OPiv)<sub>2</sub> (11 mmol, 2.2 equivalents, 4.47 g) in MeOH (10 mL) at 20 °C for 15 hours afforded compound **2b** in 58% yield (630 mg) as a colorless oil according to the general procedure. <sup>1</sup>H NMR (400 MHz, CDCl<sub>3</sub>) δ 7.27 (d, *J* = 8.7 Hz, 2H), 6.90 (d, *J* = 8.7 Hz, 2H), 4.16 (s, 2H), 3.83 (s, 3H), 3.61 (s, 3H). <sup>13</sup>C NMR (100 MHz, CDCl<sub>3</sub>) δ 159.1, 130.4, 128.7, 114.1, 62.6, 55.3, 45.9. IR (film)

2964, 2922, 2831, 1610, 1510, 1452, 1245, 1176, 1034, 982, 827, 740, 672. **HRMS** (EI) Calcd for C<sub>9</sub>H<sub>12</sub>O<sub>2</sub>S<sub>2</sub> 216.0279, Found 216.0277.

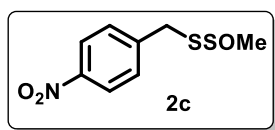

The reaction of 4-NO<sub>2</sub>C<sub>6</sub>H<sub>4</sub>CH<sub>2</sub>SSAc (5 mmol, 1 equivalent, 1.22 g), CuSO<sub>4</sub>·5H<sub>2</sub>O (0.0125 mmol, 0.25 mol%, 3.2 mg), **L1** (0.025 mmol, 0.5 mol%, 8.1 mg), Li<sub>2</sub>CO<sub>3</sub> (5 mmol, 1 equivalent, 370 mg), and PhI(OPiv)<sub>2</sub> (11 mmol, 2.2 equivalents, 4.47 g) in MeOH (10 mL) at 20 °C for 15 hours afforded compound **2c** in 74% yield (856 mg) as a white solid according to the general procedure. <sup>1</sup>H NMR (400 MHz, CDCl<sub>3</sub>) δ 8.20 (d, *J* = 8.7 Hz, 2H), 7.48 (d, *J* = 8.7 Hz, 2H), 4.19 (s, 2H), 3.57 (s, 3 H). <sup>13</sup>C NMR (100 MHz, CDCl<sub>3</sub>) δ 147.2, 144.4, 130.1, 123.8, 62.7, 44.9. **IR** (film) 2972, 1601, 1517, 1343, 1073, 980, 856, 800, 754, 675. **HRMS** (EI) Calcd for C<sub>8</sub>H<sub>9</sub>NO<sub>3</sub>S<sub>2</sub> 231.0024, Found 231.0022.

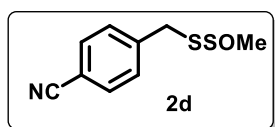

The reaction of 4-CNC<sub>6</sub>H<sub>4</sub>CH<sub>2</sub>SSAc (10 mmol, 1 equivalent, 2.24 g), CuSO<sub>4</sub>·5H<sub>2</sub>O (0.025 mmol, 0.25 mol%, 6.4 mg), **L1** (0.05 mmol, 0.5 mol%, 16.2 mg), Li<sub>2</sub>CO<sub>3</sub> (10 mmol, 1 equivalent, 740 mg), and PhI(OPiv)<sub>2</sub> (22 mmol, 2.2 equivalents, 8.94 g) in MeOH (10 mL) at 20 °C for 15 hours afforded compound **2d** in 87% yield (1.87 mg) as a colorless oil according to the general procedure. <sup>1</sup>H NMR (400 MHz, CDCl<sub>3</sub>) δ 7.62 (d, *J* = 8.3 Hz, 2H), 7.42 (d, *J* = 8.4 Hz, 2H), 4.15 (s, 2H), 3.56 (s, 3H). <sup>13</sup>C NMR (100 MHz, CDCl<sub>3</sub>) δ 142.3, 132.4, 130.0, 118.6, 111.4, 62.6, 45.4. **IR** (film) 2927, 2816, 2228, 1728, 1606, 1504, 1417, 1284, 1105, 981, 843, 740, 675. **HRMS** (EI) Calcd for C<sub>9</sub>H<sub>9</sub>NOS<sub>2</sub> 211.0126, Found 211.0132.

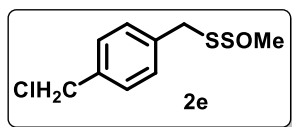

The reaction of 4-ClCH<sub>2</sub>C<sub>6</sub>H<sub>4</sub>CH<sub>2</sub>SSAc (5 mmol, 1 equivalent, 1.24 g), CuSO<sub>4</sub>·5H<sub>2</sub>O (0.0125 mmol, 0.25 mol%, 3.2 mg), **L1** (0.025 mmol, 0.5 mol%, 8.1 mg), Li<sub>2</sub>CO<sub>3</sub> (5 mmol, 1 equivalent, 370 mg), and PhI(OPiv)<sub>2</sub> (11 mmol, 2.2 equivalents, 4.47 g) in MeOH (10 mL) at 20 °C for 15 hours afforded compound **2e** in 68% yield (800 mg) as a colorless oil according to the general procedure. <sup>1</sup>H NMR (400 MHz, CDCl<sub>3</sub>) δ 7.37 (d, *J* = 8.1 Hz, 2H), 7.32 (d, *J* = 8.1 Hz, 2H), 4.58 (s, 2H), 4.16 (s, 2H), 3.58 (s, 3H). <sup>13</sup>C NMR (100 MHz, CDCl<sub>3</sub>) δ 137.0, 136.7, 129.6, 128.9, 62.6, 45.9, 45.8. **IR**

(film) 2970, 1512, 1418, 1264, 1072, 982, 829, 765, 672. **HRMS** (EI) Calcd for  $C_9H_{11}ClOS_2$  233.9940, Found 233.9943.

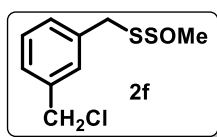

The reaction of 3-ClCH<sub>2</sub>C<sub>6</sub>H<sub>4</sub>CH<sub>2</sub>SSAc (5 mmol, 1 equivalent, 1.24 g), CuSO<sub>4</sub>·5H<sub>2</sub>O (0.0125 mmol, 0.25 mol%, 3.2 mg), **L1** (0.025 mmol, 0.5 mol%, 8.1 mg), Li<sub>2</sub>CO<sub>3</sub> (5 mmol, 1 equivalent, 370 mg), and PhI(OPiv)<sub>2</sub> (11 mmol, 2.2 equivalents, 4.47 g) in MeOH (10 mL) at 20 °C for 15 hours afforded compound **2f** in 68% yield (800 mg) as a colorless oil according to the general procedure. **<sup>1</sup>H NMR** (400 MHz, CDCl<sub>3</sub>) δ 7.38-7.28 (m, 4H), 4.60 (s, 2H), 4.18 (s, 2H), 3.59 (s, 3H). **<sup>13</sup>C NMR** (100 MHz, CDCl<sub>3</sub>) δ 137.9, 137.4, 129.4, 129.3, 129.0, 127.7, 62.7, 46.1, 45.9. **IR** (film) 2972, 2181, 1607, 1443, 1271, 1075, 982, 900, 797, 706, 673. **HRMS** (EI) Calcd for  $C_9H_{11}ClOS_2$  233.9940, Found 233.9935.

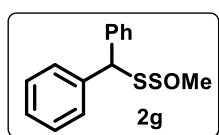

The reaction of (Ph)<sub>2</sub>CHSSAc (5 mmol, 1 equivalent, 1.38 g), CuSO<sub>4</sub>·5H<sub>2</sub>O (0.0125 mmol, 0.25 mol%, 3.2 mg), **L1** (0.025 mmol, 0.5 mol%, 8.1 mg), Li<sub>2</sub>CO<sub>3</sub> (5 mmol, 1 equivalent, 370 mg), and PhI(OPiv)<sub>2</sub> (11 mmol, 2.2 equivalents, 4.47 g) in MeOH (10 mL) at 20 °C for 15 hours afforded compound **2g** in 76% yield (997 mg) as a colorless oil according to the general procedure. **<sup>1</sup>H NMR** (400 MHz, CDCl<sub>3</sub>) δ 7.46 - 7.44 (m, 4H), 7.40-7.36 (m, 4H), 7.33 - 7.28 (m, 2H), 5.55 (s, 1H), 3.53 (s, 3H). **<sup>13</sup>C NMR** (100 MHz, CDCl<sub>3</sub>) δ 139.9, 128.9, 128.6, 127.6, 63.1, 62.9. **IR** (film), 3060, 2926, 2814, 1579, 1493, 1448, 1335, 1160, 983, 745, 697, 674, 625. **HRMS** (EI) Calcd for  $C_{14}H_{14}OS_2$  262.0486, Found 262.0488.

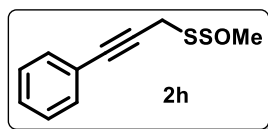

The reaction of C<sub>6</sub>H<sub>5</sub>CCCH<sub>2</sub>SSAc (5 mmol, 1 equivalent, 1.11 g), CuSO<sub>4</sub>·5H<sub>2</sub>O (0.0125 mmol, 0.25 mol%, 3.2 mg), **L1** (0.025 mmol, 0.5 mol%, 8.1 mg), Li<sub>2</sub>CO<sub>3</sub> (5 mmol, 1 equivalent, 370 mg), and PhI(OPiv)<sub>2</sub> (11 mmol, 2.2 equivalents, 4.47 g) in MeOH (10 mL) at 20 °C for 15 hours afforded compound **2h** in 50% yield (525 mg) as a colorless oil according to the general procedure. **<sup>1</sup>H NMR** (400 MHz, CDCl<sub>3</sub>) δ 7.46-7.44 (m, 2H), 7.34-7.29 (m, 3H), 3.94 (s, 2H), 3.69 (s, 3H). **<sup>13</sup>C NMR** (100 MHz, CDCl<sub>3</sub>) δ 131.7, 128.4, 128.3, 122.7, 85.5, 84.0, 63.1, 31.2. **IR** (film) 2975, 2902,

2815, 2217, 1597, 1490, 1411, 1212, 1067, 982, 755, 676. **HRMS** (EI) Calcd for  $C_{10}H_{10}OS_2$  210.0173, Found 210.0170.

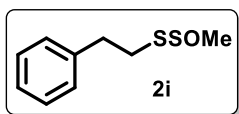

The reaction of  $C_6H_5CH_2CH_2SSAc$  (5 mmol, 1 equivalent, 1.06 g),  $CuSO_4 \cdot 5H_2O$  (0.0125 mmol, 0.25 mol%, 3.2 mg), **L1** (0.025 mmol, 0.5 mol%, 8.1 mg),  $Li_2CO_3$  (5 mmol, 1 equivalent, 370 mg), and  $PhI(OPiv)_2$  (11 mmol, 2.2 equivalents, 4.47 g) in MeOH (10 mL) at 20 °C for 15 hours afforded compound **2i** in 72% yield (726 mg) as a colorless oil according to the general procedure.  **$^1H$  NMR** (400 MHz,  $CDCl_3$ )  $\delta$  7.26-7.22 (m, 2H), 7.18-7.14 (m, 3H), 3.55 (s, 3H), 3.15-3.06 (m, 2H), 3.01-2.98 (m, 2H).  **$^{13}C$  NMR** (100 MHz,  $CDCl_3$ )  $\delta$  139.7, 128.6, 128.5, 126.4, 62.5, 42.6, 35.8. **IR** (film) 2968, 2925, 2813, 1603, 1496, 1453, 1261, 1050, 984, 748, 699, 672. **HRMS** (EI) Calcd for  $C_9H_{12}OS_2$  200.0330, Found 200.0329.

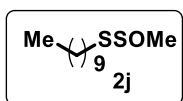

The reaction of  $Me(CH_2)_9SSAc$  (5 mmol, 1 equivalent, 1.25 g),  $CuSO_4 \cdot 5H_2O$  (0.0125 mmol, 0.25 mol%, 3.2 mg), **L1** (0.025 mmol, 0.5 mol%, 8.1 mg),  $Li_2CO_3$  (5 mmol, 1 equivalent, 370 mg), and  $PhI(OPiv)_2$  (11 mmol, 2.2 equivalents, 4.47 g) in MeOH (10 mL) at 20 °C for 15 hours afforded compound **2j** in 63% yield (745 mg) as a colorless oil according to the general procedure.  **$^1H$  NMR** (400 MHz,  $CDCl_3$ )  $\delta$  3.61 (s, 3H), 3.28-2.63 (m, 2H), 1.89-1.61 (m, 2H), 1.40-1.35 (m, 2H), 1.31-1.28 (m, 12H), 0.88 (t,  $J = 6.8$  Hz, 3H).  **$^{13}C$  NMR** (100 MHz,  $CDCl_3$ )  $\delta$  62.4, 41.8, 31.9, 29.5, 29.5, 29.4, 29.3, 29.2, 28.4, 22.7, 14.1. **IR** (film), 2924, 1457, 1409, 1251, 1052, 989, 894, 673. **HRMS** (EI) Calcd for  $C_{11}H_{24}OS_2$  236.1269, Found 236.1274.

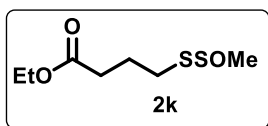

The reaction of  $EtO_2C(CH_2)_3SSAc$  (5 mmol, 1 equivalent, 1.11 g),  $CuSO_4 \cdot 5H_2O$  (0.0125 mmol, 0.25 mol%, 3.2 mg), **L1** (0.025 mmol, 0.5 mol%, 8.1 mg),  $Li_2CO_3$  (5 mmol, 1 equivalent, 370 mg), and  $PhI(OPiv)_2$  (11 mmol, 2.2 equivalents, 4.47 g) in MeOH (10 mL) at 20 °C for 15 hours afforded compound **2k** in 75% yield (789 mg) as a colorless oil according to the general procedure.  **$^1H$  NMR** (400 MHz,  $CDCl_3$ )  $\delta$  4.13 (q,  $J = 7.1$  Hz, 2H), 3.60 (s, 3H), 2.96 (t,  $J = 7.2$  Hz, 2H), 2.43 (t,  $J = 7.2$  Hz, 2H), 2.08 (p,  $J = 7.2$  Hz, 2H), 1.25 (t,  $J = 7.1$  Hz, 3H).  **$^{13}C$  NMR** (100 MHz,  $CDCl_3$ )  $\delta$

172.8, 62.5, 60.4, 40.6, 32.5, 24.5, 14.2. **IR** (film) 2981, 1731, 1374, 1200, 1133, 1041, 984, 801, 673. **HRMS** (EI) Calcd for C<sub>7</sub>H<sub>14</sub>O<sub>3</sub>S<sub>2</sub> 210.0834, Found 210.0388.

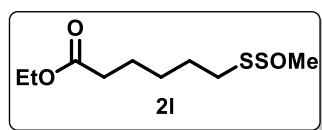

The reaction of EtO<sub>2</sub>C(CH<sub>2</sub>)<sub>5</sub>SSAc (5 mmol, 1 equivalent, 1.25 g), CuSO<sub>4</sub>·5H<sub>2</sub>O (0.0125 mmol, 0.25 mol%, 3.2 mg), **L1** (0.025 mmol, 0.5 mol%, 8.1 mg), Li<sub>2</sub>CO<sub>3</sub> (5 mmol, 1 equivalent, 370 mg), and PhI(OPiv)<sub>2</sub> (11 mmol, 2.2 equivalents, 4.47 g) in MeOH (10 mL) at 20 °C for 15 hours afforded compound **2l** in 36% yield (450 mg) as a colorless oil according to the general procedure. **<sup>1</sup>H NMR** (400 MHz, CDCl<sub>3</sub>) δ 7.26-7.22 (m, 2H), 7.18-7.14 (m, 3H), 3.55 (s, 3H), 3.15-3.06 (m, 2H), 3.01-2.98 (m, 2H). **<sup>13</sup>C NMR** (100 MHz, CDCl<sub>3</sub>) δ 173.56, 62.4, 60.3, 41.4, 34.1, 29.0, 27.8, 24.5, 14.2. **IR** (film) 2967, 2900, 1733, 1376, 1253, 1186, 1075, 1056, 986, 750, 673. **HRMS** (EI) Calcd for C<sub>9</sub>H<sub>18</sub>O<sub>3</sub>S<sub>2</sub> 238.0697, Found 238.0699.

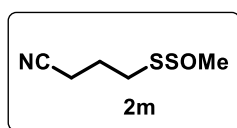

The reaction of NC(CH<sub>2</sub>)<sub>3</sub>SSAc (5 mmol, 1 equivalent, 853 mg), CuSO<sub>4</sub>·5H<sub>2</sub>O (0.0125 mmol, 0.25 mol%, 3.2 mg), **L1** (0.025 mmol, 0.5 mol%, 8.1 mg), Li<sub>2</sub>CO<sub>3</sub> (5 mmol, 1 equivalent, 370 mg), and PhI(OPiv)<sub>2</sub> (11 mmol, 2.2 equivalents, 4.47 g) in MeOH (10 mL) at 20 °C for 15 hours afforded compound **2m** in 75% yield (612 mg) as a colorless oil according to the general procedure. **<sup>1</sup>H NMR** (400 MHz, CDCl<sub>3</sub>) δ 3.62 (s, 1H), 3.02 (t, *J* = 6.9 Hz, 2 H), 2.51 (t, *J* = 7.0 Hz, 2H), 2.15 (tt, *J* = 7.0 Hz, *J* = 6.9 Hz, 2H). **<sup>13</sup>C NMR** (100 MHz, CDCl<sub>3</sub>) δ 118.9, 62.6, 39.1, 24.9, 15.7. **IR** (film) 2963, 2928, 2816, 2247, 1731, 1445, 1424, 981, 674. **HRMS** (EI) Calcd for C<sub>5</sub>H<sub>9</sub>NOS<sub>2</sub> 163.0126, Found 163.0125.

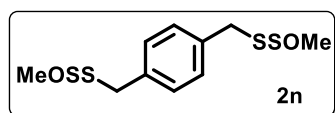

The reaction of AcSSCH<sub>2</sub>C<sub>6</sub>H<sub>4</sub>CH<sub>2</sub>SSAc (2.5 mmol, 1 equivalent, 796 mg), CuSO<sub>4</sub>·5H<sub>2</sub>O (0.0125 mmol, 0.5 mol%, 3.2 mg), **L1** (0.05 mmol, 1 mol%, 8.1 mg), Li<sub>2</sub>CO<sub>3</sub> (5 mmol, 2 equivalents, 370 mg), and PhI(OPiv)<sub>2</sub> (11 mmol, 4.4 equivalents, 4.47 g) in MeOH: acetone (9: 1) (10 mL) at 20 °C for 15 hours afforded compound **2n** in 38% yield (282 mg) as a white solid according to the general procedure. **<sup>1</sup>H NMR** (400 MHz, CDCl<sub>3</sub>) δ 7.30 (s, 4H), 4.15 (s, 4H), 3.57 (s, 6H). **<sup>13</sup>C NMR** (100 MHz,

CDCl<sub>3</sub>)  $\delta$  136.1, 129.6, 62.7, 46.0. **IR** (film) 2982, 1411, 1231, 1053, 979, 831, 669. **HRMS** (EI) Calcd for C<sub>10</sub>H<sub>14</sub>O<sub>2</sub>S<sub>4</sub> 293.9872, Found 293.9877.

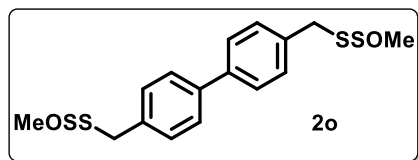

The reaction of AcSSCH<sub>2</sub>C<sub>6</sub>H<sub>4</sub>C<sub>6</sub>H<sub>4</sub>CH<sub>2</sub>SSAc (2.5 mmol, 1 equivalent, 987 mg), CuSO<sub>4</sub>·5H<sub>2</sub>O (0.0125 mmol, 0.5 mol%, 3.2 mg), **L1** (0.05 mmol, 1 mol%, 8.1 mg), Li<sub>2</sub>CO<sub>3</sub> (5 mmol, 2 equivalents, 370 mg), and PhI(OPiv)<sub>2</sub> (11 mmol, 4.4 equivalents, 4.47 g) in MeOH : acetone (9: 1) (10 mL) at 20 °C for 15 hours afforded compound **2o** in 42% yield (388 mg) as a white solid according to the general procedure. **<sup>1</sup>H NMR** (400 MHz, CDCl<sub>3</sub>)  $\delta$  7.57 (d, *J* = 8.2 Hz, 4H), 7.40 (d, *J* = 8.1 Hz, 4H), 4.21 (s, 4H), 3.60 (s, 6H). **<sup>13</sup>C NMR** (100 MHz, CDCl<sub>3</sub>)  $\delta$  139.9, 135.9, 129.7, 127.3, 62.7, 46.1. **IR** (film) 2987, 2971, 2810, 1494, 1405, 1232, 1054, 981, 823, 725, 668. **HRMS** (EI) Calcd for C<sub>16</sub>H<sub>18</sub>O<sub>2</sub>S<sub>4</sub> 370.0190, Found 370.0188.

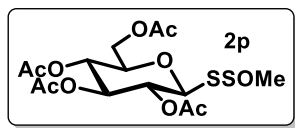

The reaction of RSSAc (5 mmol, 1 equivalent, 2.2 g), CuSO<sub>4</sub>·5H<sub>2</sub>O (0.0125 mmol, 0.25 mol%, 3.2 mg), **L1** (0.025 mmol, 0.5 mol%, 8.1 mg), Li<sub>2</sub>CO<sub>3</sub> (5 mmol, 1 equivalent, 370 mg), and PhI(OPiv)<sub>2</sub> (11 mmol, 2.2 equivalents, 4.47 g) in MeOH (10 mL) at 20 °C for 15 hours afforded compound **2p** in 88% yield (1.88 g) as a white solid according to the general procedure. **<sup>1</sup>H NMR** (400 MHz, CDCl<sub>3</sub>)  $\delta$  5.33 - 5.19 (m, 2H), 5.15-5.11 (m, 1H), 4.67-4.65 (m, 1H), 4.26 (d of ABq, *J* = 12.5, 4.7 Hz, 1H), 4.16 (d of ABq, *J* = 12.5, 2.3 Hz, 1H), 3.80 (ddd, *J* = 10.0, 4.7, 2.3 Hz, 1H), 3.64 (s, 3H), 2.05 (s, 3H), 2.03 (s, 3H), 2.02 (s, 3H), 2.01 (s, 3H). **<sup>13</sup>C NMR** (100 MHz, CDCl<sub>3</sub>)  $\delta$  170.5, 170.2, 169.3, 169.0, 76.5, 73.8, 69.9, 67.9, 63.7, 61.8, 20.6. **IR** (film) 2946, 1746, 1366, 1226, 1208, 1031, 973, 756. 695. **HRMS** (ESI) Calcd for C<sub>15</sub>H<sub>22</sub>O<sub>10</sub>S<sub>2</sub> (M+Na<sup>+</sup>) 449.0547, Found 449.0559.

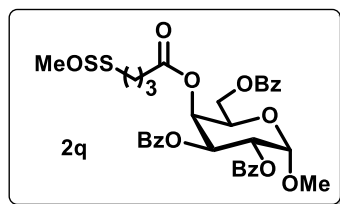

The reaction of RSSAc (5 mmol, 1 equivalent, 3.42 g), CuSO<sub>4</sub>·5H<sub>2</sub>O (0.0125 mmol, 0.25 mol%, 3.2 mg), **L1** (0.025 mmol, 0.5 mol%, 8.1 mg), Li<sub>2</sub>CO<sub>3</sub> (5 mmol, 1 equivalent, 370 mg), and PhI(OPiv)<sub>2</sub> (11 mmol, 2.2 equivalents, 4.47 g) in MeOH (10 mL) at 20 °C for 15 hours afforded compound **2q** in

64% yield (2.13 g) as a white solid according to the general procedure. **<sup>1</sup>H NMR** (400 MHz, CDCl<sub>3</sub>)  $\delta$  8.03 (d,  $J$  = 7.3 Hz, 2H), 8.00 (d,  $J$  = 7.3 Hz, 2H), 7.89 (d,  $J$  = 7.3 Hz, 2H), 7.59-7.55 (m, 1H), 7.54-7.48 (m, 2H), 7.47-7.43 (m, 2H), 7.40-7.35 (m, 4H), 5.92 - 5.78 (m, 2H), 5.60 (d of ABq,  $J$  = 10.6, 3.6 Hz, 1H), 5.24 (d,  $J$  = 3.6 Hz, 1H), 4.55-4.50 (m, 2H), 4.39-4.33 (m, 1H), 3.57 (s, 3H), 3.47 (s, 3H), 2.85 (t,  $J$  = 7.1 Hz, 2H), 2.66-2.52 (m, 2H), 2.05 (p,  $J$  = 7.1 Hz, 2H). **<sup>13</sup>C NMR** (100 MHz, CDCl<sub>3</sub>)  $\delta$  171.8, 165.9, 165.4, 133.3(3), 133.2(6), 133.2(5), 129.8, 129.6, 129.5, 129.4, 129.2, 128.4, 128.4, 128.4, 97.5, 68.9, 68.5, 68.3, 66.4, 62.4, 62.2, 55.6, 40.1, 32.0, 24.4. **IR** (film) 2974, 2902, 2817, 1721, 1602, 1451, 1315, 1064, 984, 708, 674. **HRMS** (ESI) Calcd for C<sub>33</sub>H<sub>34</sub>O<sub>11</sub>S<sub>2</sub> (M+Na<sup>+</sup>) 693.1435, Found 693.1449.

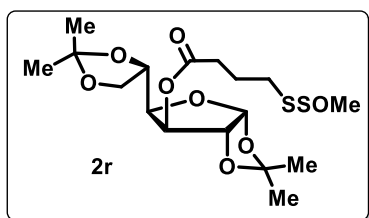

The reaction of RSSAc (5 mmol, 1 equivalent, 2.14 g), CuSO<sub>4</sub>·5H<sub>2</sub>O (0.0125 mmol, 0.25 mol%, 3.2 mg), **L1** (0.025 mmol, 0.5 mol%, 8.1 mg), Li<sub>2</sub>CO<sub>3</sub> (5 mmol, 1 equivalent, 370 mg), and PhI(OPiv)<sub>2</sub> (11 mmol, 2.2 equivalents, 4.47 g) in MeOH (10 mL) at 20 °C for 15 hours afforded compound **2r** in 67% yield (1.42 g) as a colorless oil according to the general procedure. **<sup>1</sup>H NMR** (400 MHz, CDCl<sub>3</sub>)  $\delta$  5.86 (d,  $J$  = 3.6 Hz, 1H), 5.27 (s, 1H), 4.47 (d,  $J$  = 3.6 Hz, 1H), 4.22 - 4.16 (m, 2H), 4.09 - 4.06 (m, 1H), 4.03 - 3.95 (m, 1H), 3.59 (s, 3H), 2.95 (t,  $J$  = 7.1 Hz, 2H), 2.56 - 2.40 (m, 2H), 2.10 (p,  $J$  = 7.1 Hz, 2H), 1.50 (s, 3H), 1.39 (s, 3H), 1.30 (s, 3H), 1.29 (s, 3H). **<sup>13</sup>C NMR** (100 MHz, CDCl<sub>3</sub>)  $\delta$  171.4, 112.2, 109.3, 105.0, 83.3, 79.8, 76.0, 72.4, 67.3, 62.4, 40.0, 32.3, 26.8, 26.7, 26.1, 25.2, 24.4. **IR** (film) 2986, 2903, 1744, 1376, 1215, 1161, 1072, 1023, 985, 845, 733, 675. **HRMS** (EI) Calcd for C<sub>17</sub>H<sub>28</sub>O<sub>8</sub>S<sub>2</sub> 424.1226, Found 424.1229.

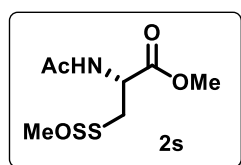

The reaction of RSSAc (5 mmol, 1 equivalent, 1.27 g), CuSO<sub>4</sub>·5H<sub>2</sub>O (0.0125 mmol, 0.25 mol%, 3.2 mg), **L1** (0.025 mmol, 0.5 mol%, 8.1 mg), Li<sub>2</sub>CO<sub>3</sub> (5 mmol, 1 equivalent, 370 mg), and PhI(OPiv)<sub>2</sub> (11 mmol, 2.2 equivalents, 4.47 g) in MeOH (10 mL) at 20 °C for 15 hours afforded compound **2s** in 67% yield (806 mg) as a white solid according to the general procedure. **<sup>1</sup>H NMR** (400 MHz, CDCl<sub>3</sub>)  $\delta$  6.73 (brs, 1H), 5.07-4.95 (m, 1H), 3.76 (s, 3H), 3.63 (s, 3H), 3.47 (d of ABq,  $J$  = 14.2, 4.4

Hz, 1H), 3.35 (d of ABq,  $J = 14.2, 3.1$  Hz, 1H), 2.00 (s, 3H).  $^{13}\text{C}$  NMR (100 MHz,  $\text{CDCl}_3$ )  $\delta$  170.4, 169.9, 62.6, 52.7, 51.4, 44.6, 23.0. IR (film) 3287, 2998, 2971, 2882, 1722, 1639, 1543, 1377, 1243, 1066, 980, 797, 757, 673. HRMS (ESI) Calcd for  $\text{C}_7\text{H}_{13}\text{NO}_4\text{S}_2$  ( $\text{M}+\text{Na}^+$ ) 262.0178, Found 262.0178.

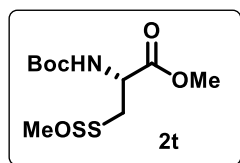

The reaction of RSSAc (5 mmol, 1 equivalent, 1.56 g),  $\text{CuSO}_4 \cdot 5\text{H}_2\text{O}$  (0.0125 mmol, 0.25 mol%, 3.2 mg), **L1** (0.025 mmol, 0.5 mol%, 8.1 mg),  $\text{Li}_2\text{CO}_3$  (5 mmol, 1 equivalent, 370 mg), and  $\text{PhI}(\text{OPiv})_2$  (11 mmol, 2.2 equivalents, 4.47 g) in MeOH (10 mL) at 20 °C for 15 hours afforded compound **2t** in 67% yield (1.22 g) as a colorless oil according to the general procedure.  $^1\text{H}$  NMR (400 MHz,  $\text{CDCl}_3$ )  $\delta$  5.53 (s, 1H), 4.80 - 4.49 (m, 1H), 3.76 (s, 3H), 3.61 (s, 3H), 3.41 (d,  $J = 4.0$  Hz, 2H), 1.43 (s, 9H).  $^{13}\text{C}$  NMR (100 MHz,  $\text{CDCl}_3$ )  $\delta$  170.8, 155.1, 80.1, 62.5, 52.9, 52.6, 44.8, 28.2. IR (film) 3374, 2974, 2904, 1747, 1715, 1506, 1367, 1255, 1162, 1052, 983, 866, 760, 679. HRMS (EI) Calcd for  $\text{C}_{10}\text{H}_{19}\text{NO}_5\text{S}_2$  297.0705, Found 297.0707.

## Optimization of polysulfuration

**Supplementary Table 3.** Optimization of disulfuration with acetylacetone.

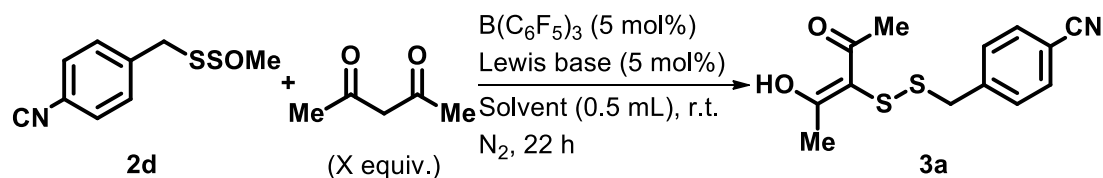

| Entry                   | X (equiv.) | Lewis base (mol%)                        | Solvent     | Yield (%)   |
|-------------------------|------------|------------------------------------------|-------------|-------------|
| 1                       | 2.4        | -                                        | PhMe        | 23          |
| 2                       | 2.4        | Et <sub>3</sub> N/ TMP/ PMP <sup>e</sup> | PhMe        | 20/ 16/ 18  |
| 3                       | 2.4        | DMAP                                     | PhMe        | Complicated |
| 4                       | 2.4        | 4-MeOPy                                  | PhMe        | 59          |
| 5                       | 2.4        | 4-HOPy                                   | PhMe        | 56          |
| 6                       | 2.4        | 4-MePy                                   | PhMe        | 42          |
| 7                       | 2.4        | 2,4,6-Collidine                          | PhMe        | 20          |
| 8                       | 2.4        | 2,4-diMeOPy                              | PhMe        | 22          |
| 9                       | 2.4        | 4-MeOPy                                  | DCE         | 76          |
| 10                      | 2.4        | 4-MeOPy                                  | THF         | 71          |
| 11                      | 2.4        | 4-MeOPy                                  | 1,4-dioxane | 41          |
| 12 <sup>c</sup>         | 2.4        | 4-MeOPy                                  | DCE         | 81          |
| 13 <sup>c</sup>         | 1.1        | 4-MeOPy                                  | DCE         | 82          |
| <b>14<sup>c,d</sup></b> | <b>1.1</b> | <b>4-MeOPy</b>                           | <b>DCE</b>  | <b>85</b>   |

<sup>a</sup>**2d** (0.2 mmol, 1 equivalent), acetylacetone, B(C<sub>6</sub>F<sub>5</sub>)<sub>3</sub> (0.01 mmol, 5 mol%) and Lewis base (0.01 mmol, 5 mol%) were added to DCE at r.t. for 22 h. <sup>b</sup>Isolated yields. <sup>c</sup>DCE (0.25 mL). <sup>d</sup>Air atmosphere. <sup>e</sup>TMP = 2,2,6,6-tetramethylpiperidine, PMP = 1,2,2,6,6-pentamethylpiperidine.

To a Schlenk tube were added **2d** (0.2 mmol, 1 equivalent, 42.3 mg), acetylacetone, B(C<sub>6</sub>F<sub>5</sub>)<sub>3</sub> (0.01 mmol, 5 mol%, 5.2 mg), Lewis base (0.01 mmol, 5 mol%), and solvent, the mixture was stirred at r.t. before it was concentrated under vacuum. Purification by column chromatography afforded the desired product.

**Supplementary Table 4.** Optimization of disulfuration with indole.

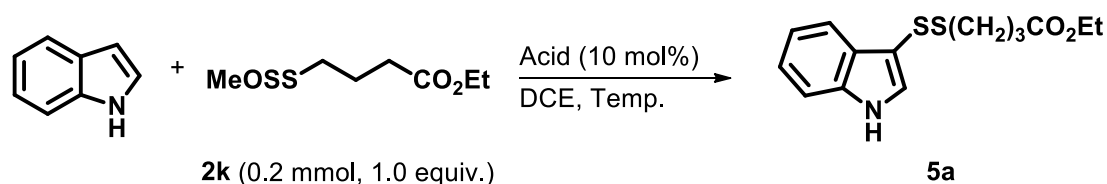

| Entry          | Acid                                                              | DCE /M | Temp. /°C | Yield /% |
|----------------|-------------------------------------------------------------------|--------|-----------|----------|
| 1              | TsOH                                                              | [0.2]  | 25        | 48       |
| 2 <sup>c</sup> | TsOH                                                              | [0.2]  | 25        | 47       |
| 3 <sup>d</sup> | TsOH                                                              | [0.2]  | 25        | 49       |
| 4              | TsOH                                                              | [0.4]  | 25        | 53       |
| 5              | TsOH                                                              | [0.8]  | 25        | 50       |
| 6              | TsOH                                                              | [0.4]  | 0         | 60       |
| 7              | TsOH                                                              | [0.4]  | -10       | 55       |
| 8              | CSA                                                               | [0.4]  | 0         | 50       |
| 9              | 4-NO <sub>2</sub> C <sub>6</sub> H <sub>4</sub> COOH              | [0.4]  | 0         | NR       |
| 10             | NsOH                                                              | [0.4]  | 0         | 52       |
| 11             | 4-ClC <sub>6</sub> H <sub>4</sub> SO <sub>3</sub> H               | [0.4]  | 0         | 30       |
| 12             | 4-NH <sub>2</sub> C <sub>6</sub> H <sub>4</sub> SO <sub>3</sub> H | [0.4]  | 0         | trace    |
| 13             | C <sub>6</sub> H <sub>4</sub> SO <sub>3</sub> H                   | [0.4]  | 0         | 47       |

<sup>a</sup>**2k** (0.2 mmol, 1 equivalent), indole (0.4 mmol, 2 equivalents), and catalyst (0.02 mmol, 10 mol%) were added to DCE at r.t. for 5 h. <sup>b</sup>Isolated yields. <sup>c</sup>TsOH (5 mol%). <sup>d</sup> TsOH (10 mol%).

To a Schlenk tube were added **2k** (0.2 mmol, 1 equivalent, 42.1 mg), indole (0.4 mmol, 2 equivalents), catalyst (0.02 mmol, 10 mol%), and DCE, the mixture was stirred for 5 hours before it was concentrated under vacuum. Purification by column chromatography afforded the desired product.

**Supplementary Table 5.** Optimization of disulfuration with indole using Brønsted acids.

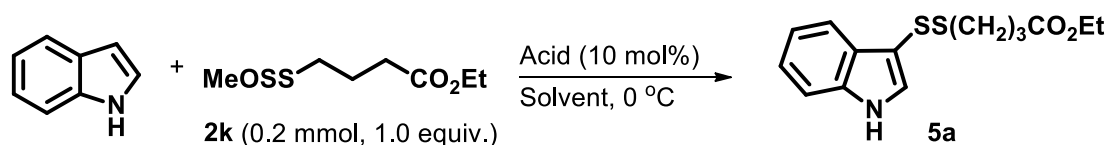

| Entry     | Indole /equiv. | Acid                     | Solvent /M            | Yield /%  |
|-----------|----------------|--------------------------|-----------------------|-----------|
| 1         | 2.0            | TsOH                     | THF                   | 59        |
| 2         | 2.0            | TsOH                     | PhCl                  | 49        |
| 3         | 2.0            | TsOH                     | MeCN                  | 40        |
| 4         | 2.0            | TsOH                     | HCCl <sub>3</sub>     | 62        |
| 5         | 2.0            | TsOH                     | MeOH                  | 60        |
| 6         | 2.0            | TsOH                     | Acetone               | 36        |
| 7         | 2.0            | TsOH                     | EtOH                  | 60        |
| 8         | 2.0            | TsOH                     | Dioxane               | 60        |
| 9         | 2.0            | TsOH                     | DMF                   | 42        |
| 10        | 2.0            | TsOH                     | PhMe                  | 61        |
| 11        | 2.0            | TsOH                     | EA                    | 60        |
| 12        | 2.0            | TsOH                     | <i>i</i> PrOH         | 66        |
| 13        | 2.0            | TsOH                     | <i>n</i> PrOH         | 70        |
| 14        | 2.0            | TsOH                     | <i>n</i> BuOH         | 70        |
| 15        | 2.0            | TsOH                     | <i>i</i> BuOH         | 74        |
| 16        | 2.0            | TsOH                     | <i>t</i> AmylOH       | 74        |
| 17        | 2.0            | TsOH                     | HFIP                  | 52        |
| 18        | 1.5            | TsOH                     | <i>t</i> AmylOH       | 75        |
| <b>19</b> | <b>1.5</b>     | <b>MeSO<sub>3</sub>H</b> | <b><i>t</i>AmylOH</b> | <b>78</b> |
| 20        | 1.5            | CSA                      | <i>t</i> AmylOH       | 77        |

<sup>a</sup>**2k** (0.2 mmol, 1 equivalent), indole, and catalyst (0.02 mmol, 10 mol%) were added to solvent at 0 °C for 5 h. <sup>b</sup>Isolated yields.

To a Schlenk tube were added **2k** (0.2 mmol, 1 equivalent, 42.1 mg), indole (0.4 mmol, 2 equivalents), catalyst (0.02 mmol, 10 mol%), and solvent, the mixture was stirred at 0 °C for 5 hours before it was concentrated under vacuum. Purification by column chromatography afforded the desired product.

**Supplementary Table 6.** Optimization of disulfuration with indole using  $B(C_6F_5)_3$ .

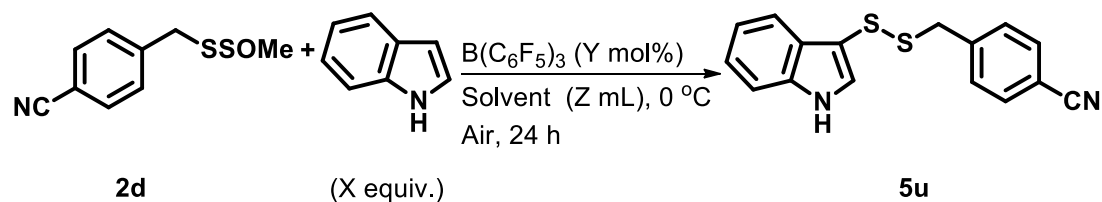

| Entry          | X /equiv.  | Y /mol%  | Solvent /mL           | Yield /%  |
|----------------|------------|----------|-----------------------|-----------|
| 1 <sup>c</sup> | 1.5        | 10       | <i>t</i> AmylOH (0.5) | 79        |
| 2              | 1.5        | 2        | PhMe (0.5)            | 83        |
| 3              | 1.2        | 2        | PhMe (0.5)            | 81        |
| 4              | 1.2        | 2        | PhMe (0.25)           | 87        |
| 5              | 1.1        | 2        | PhMe (0.25)           | 86        |
| <b>6</b>       | <b>1.1</b> | <b>1</b> | <b>PhMe (0.25)</b>    | <b>86</b> |

<sup>a</sup>**2d** (0.2 mmol, 1 equivalent), indole, and catalyst were added to solvent at 0 °C for 24h. <sup>b</sup>Isolated yields. <sup>c</sup>MeSO<sub>3</sub>H (10 mol%).

To a Schlenk tube were added **2d** (0.2 mmol, 1 equivalent, 42.3 mg), indole, catalyst, and PhMe, the mixture was stirred at 0 °C for 24 hours before it was concentrated under vacuum. Purification by column chromatography afforded the desired product.

**Supplementary Table 7.** Optimization of disulfuration with aniline.

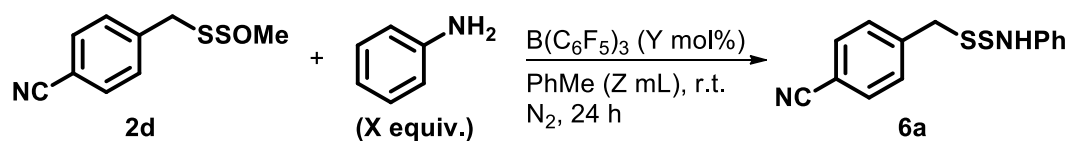

| Entry                | X/ equiv.  | Y/ mol%    | PhMe/ mL   | Yield/ %  |
|----------------------|------------|------------|------------|-----------|
| 1                    | 1.2        | 5          | 1.0        | 82        |
| 2                    | 1.2        | 2          | 1.0        | 67        |
| 3                    | 1.5        | 5          | 1.0        | 85        |
| 4                    | 1.2        | 5          | 0.5        | 88        |
| 5                    | 1.2        | 2.5        | 0.5        | 87        |
| 6                    | 1.2        | 0          | 0.5        | 9         |
| <b>7<sup>c</sup></b> | <b>1.1</b> | <b>2.5</b> | <b>0.5</b> | <b>86</b> |

<sup>a</sup>**2d** (0.2 mmol, 1 equivalent), PhNH<sub>2</sub>, and B(C<sub>6</sub>F<sub>5</sub>)<sub>3</sub> were added to PhMe at r.t. for 24h. <sup>b</sup>Isolated yields. <sup>c</sup>Air atmosphere.

To a Schlenk tube were added **2d** (0.2 mmol, 1 equivalent, 42.3 mg), PhNH<sub>2</sub>, B(C<sub>6</sub>F<sub>5</sub>)<sub>3</sub>, and PhMe, the mixture was stirred at r.t. for 24 hours before it was concentrated under vacuum. Purification by column chromatography afforded the desired product.

## General Procedure and Spectra Data of Polysulfuration

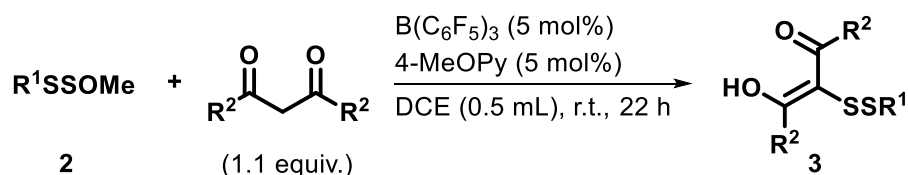

**General procedure A:** To a Schlenk tube were added 1,3-dicarbonyl compound (0.22 mmol, 1.1 equivalents), B(C<sub>6</sub>F<sub>5</sub>)<sub>3</sub> (0.01 mmol, 5 mol%, 5.2 mg), 4-MeO-pyridine (0.01 mmol, 5 mol%, 1.1 mg), RSSOMe (0.2 mmol, 1 equivalent), and 1,2-dichloroethane (0.25 mL), the mixture was stirred at r.t. for 22 hours before it was concentrated under vacuum. Purification by column chromatography afforded the desired product.

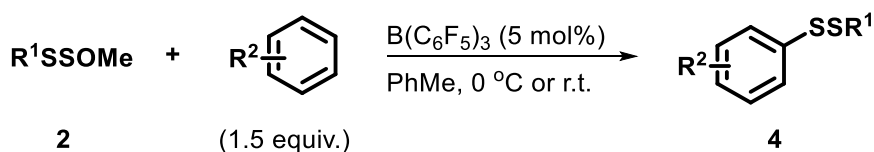

**General procedure B:** To a Schlenk tube were added arene (0.3mmol, 1.5 equivalents), B(C<sub>6</sub>F<sub>5</sub>)<sub>3</sub> (0.01 mmol, 5 mol%, 5.2 mg), RSSOMe (0.2 mmol, 1 equivalent), and toluene (0.5 mL), the mixture was stirred at 0 °C or r.t. for 24-60 hours before it was concentrated under vacuum. Purification by column chromatography afforded the desired product.

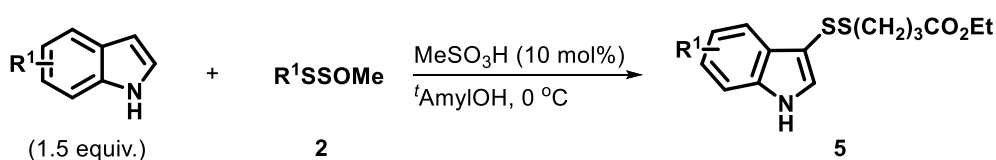

**General procedure C<sub>1</sub>:** To a Schlenk tube were added indole (0.3 mmol, 1.5 equivalents), MeSO<sub>3</sub>H (0.02 mmol, 10 mol%, 2 mg), RSSOMe (0.2 mmol, 1 equivalent), and *t*-AmylOH (0.5 mL), the mixture was stirred at r.t. for 24 hours

before it was concentrated under vacuum. Purification by column chromatography afforded the desired product.

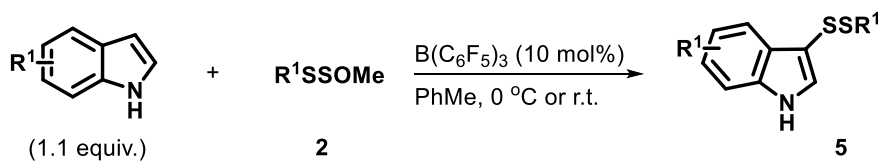

**General procedure C<sub>2</sub>:** To a Schlenk tube were added indole (0.22 mmol, 1.1 equivalents), B(C<sub>6</sub>F<sub>5</sub>)<sub>3</sub> (0.004 mmol, 2 mol%, 2.1 mg), RSSOMe (0.2 mmol, 1 equivalent), and toluene (0.25 mL), the mixture was stirred at 0 °C or r.t. for 24 hours before it was concentrated under vacuum. Purification by column chromatography afforded the desired product.

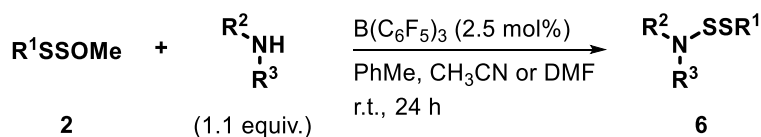

**General procedure D:** To a Schlenk tube were added amine (0.22 mmol, 1.1 equivalents), B(C<sub>6</sub>F<sub>5</sub>)<sub>3</sub> (0.01 mmol, 2.5 mol%, 2.6 mg), RSSOMe (0.2 mmol, 1 equivalent), and toluene/CH<sub>3</sub>CN/DMF (0.5 mL), the mixture was stirred at 0 °C or r.t. for 24 hours before it was concentrated under vacuum. Purification by column chromatography afforded the desired product.

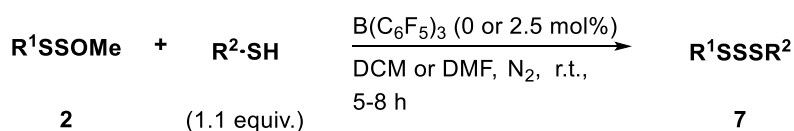

**General procedure E:** To a Schlenk tube were added thiol (0.22 mmol, 1.1 equivalents), B(C<sub>6</sub>F<sub>5</sub>)<sub>3</sub>, RSSOMe (0.2 mmol, 1 equivalent), and DCM/DMF (0.5 mL), the mixture was stirred at r.t. under N<sub>2</sub> atmosphere for 5-8 hours before it was

concentrated under vacuum. Purification by column chromatography afforded the desired product.

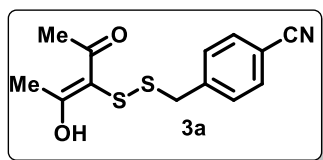

The reaction of acetylacetone (0.22 mmol, 1.1 equivalents, 22 mg),  $B(C_6F_5)_3$  (0.01 mmol, 5 mol%, 5.2 mg), 4-MeO-pyridine (0.01 mmol, 5 mol%, 1.1 mg), 4-NCC<sub>6</sub>H<sub>4</sub>CH<sub>2</sub>SSOMe (0.2 mmol, 1 equivalent, 42.3 mg) in DCE (0.25 mL) at r.t. for 22 hours afforded compound **3a** in 85% yield (47.4 mg) as a white solid according to the general procedure A. **<sup>1</sup>H NMR** (400 MHz, CDCl<sub>3</sub>)  $\delta$  16.98 (s, 1H), 7.56 (d,  $J$  = 8.3 Hz, 2H), 7.38 (d,  $J$  = 8.2 Hz, 2H), 4.01 (s, 2H), 2.36 (s, 6H). **<sup>13</sup>C NMR** (100 MHz, CDCl<sub>3</sub>)  $\delta$  197.3, 142.1, 132.5, 129.7, 118.5, 111.5, 107.3, 42.1, 24.8. **IR** (film) 2974, 2905, 2229, 1737, 1405, 1253, 1227, 1052, 908, 845. **HRMS** (EI) Calcd for C<sub>13</sub>H<sub>13</sub>NO<sub>2</sub>S<sub>2</sub> 279.0388, Found 279.0387.

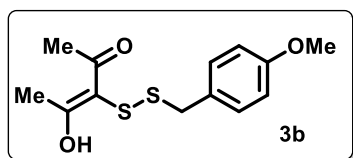

The reaction of acetylacetone (0.22 mmol, 1.1 equivalents, 22 mg),  $B(C_6F_5)_3$  (0.01 mmol, 5 mol%, 5.2 mg), 4-MeO-pyridine (0.01 mmol, 5 mol%, 1.1 mg), 4-MeOC<sub>6</sub>H<sub>4</sub>CH<sub>2</sub>SSOMe (0.2 mmol, 1 equivalent, 43.3 mg) in DCE (0.25 mL) at r.t. for 22 hours afforded compound **3b** in 98% yield (55.7 mg) as a white solid according to the general procedure A. **<sup>1</sup>H NMR** (400 MHz, CDCl<sub>3</sub>)  $\delta$  17.04 (s, 1H), 7.23 (d,  $J$  = 8.6 Hz, 2H), 6.85 (d,  $J$  = 8.6 Hz, 2H), 4.04 (s, 2H), 3.80 (s, 3H), 2.45 (s, 6H). **<sup>13</sup>C NMR** (100 MHz, CDCl<sub>3</sub>)  $\delta$  197.3, 159.1, 130.3, 128.1, 114.1, 107.9, 55.3, 42.2, 24.8. **IR** (film) 2968, 2905, 1606, 1509, 1405, 1248, 1175, 1036, 827, 741, 684. **HRMS** (EI) Calcd for C<sub>13</sub>H<sub>16</sub>O<sub>3</sub>S<sub>2</sub> 284.0541, Found 284.0540.

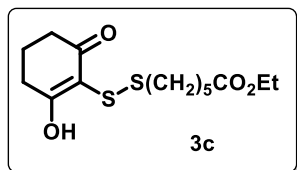

The reaction of 1,3-Cyclohexanedione (0.22 mmol, 1.1 equivalents, 24.7 mg),  $B(C_6F_5)_3$  (0.01 mmol, 5 mol%, 5.2 mg), 4-MeO-pyridine (0.01 mmol, 5 mol%, 1.1 mg), EtO<sub>2</sub>C(CH<sub>2</sub>)<sub>5</sub>SSOMe (0.2 mmol, 1 equivalent, 47.7 mg) in DCE (0.25 mL) at r.t. for 22 hours afforded compound **3c** in 50% yield (31.9 mg) as a colorless oil according to the general procedure A. **<sup>1</sup>H NMR** (400 MHz, CDCl<sub>3</sub>)  $\delta$

7.82 (brs, 1H), 4.12 (q,  $J = 7.1$  Hz, 2H), 2.94 (t,  $J = 7.3$  Hz, 2H), 2.65 (s, 2H), 2.50 (s, 2H), 2.30 (t,  $J = 7.5$  Hz, 2H), 2.06-1.95 (m, 2H), 1.78-1.71 (m, 2H), 1.69-1.61 (m, 2H), 1.47-1.39 (m, 2H), 1.25 (t,  $J = 7.1$  Hz, 3H).  **$^{13}\text{C}$  NMR** (100 MHz,  $\text{CDCl}_3$ )  $\delta$  201.6, 173.6, 113.0, 60.2, 39.1, 34.2, 28.8, 27.9, 24.5, 19.7, 14.2. **IR** (film) 2937, 2865, 1730, 1658, 1562, 1373, 1174, 1135, 1029, 822, 732, 695. **HRMS** (EI) Calcd for  $\text{C}_{14}\text{H}_{22}\text{O}_4\text{S}_2$  318.0960, Found 318.0956.

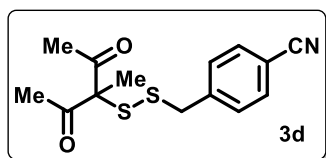

The reaction of 3-methyl-2,4-pentanedione (0.22 mmol, 1.1 equivalents, 25.1 mg),  $\text{B}(\text{C}_6\text{F}_5)_3$  (0.01 mmol, 5 mol%, 5.2 mg), 4-MeO-pyridine (0.01 mmol, 5 mol%, 1.1 mg), 4-NCC $_6\text{H}_4\text{CH}_2\text{SSOMe}$  (0.2 mmol, 1 equivalent, 42.3 mg)

in DCE (0.25 mL) at r.t. for 22 hours afforded compound **3d** in 47% yield (27.6 mg) as a white solid according to the general procedure A.  **$^1\text{H}$  NMR** (400 MHz,  $\text{CDCl}_3$ )  $\delta$  7.61 (d,  $J = 8.1$  Hz, 2H), 7.39 (d,  $J = 8.1$  Hz, 2H), 3.89 (s, 2H), 2.26 (s, 6H), 1.67 (s, 3H).  **$^{13}\text{C}$  NMR** (100 MHz,  $\text{CDCl}_3$ )  $\delta$  201.9, 141.9, 132.4, 130.1, 118.6, 111.5, 73.7, 42.8, 26.8, 19.2. **IR** (film) 2980, 2905, 2228, 1690, 1447, 1253, 1073, 893, 757, 640. **HRMS** (EI) Calcd for  $\text{C}_{14}\text{H}_{15}\text{NO}_2\text{S}_2$  293.0544, Found 293.0549.

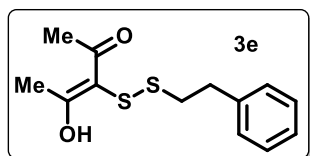

The reaction of acetylacetone (0.22 mmol, 1.1 equivalents, 22 mg),  $\text{B}(\text{C}_6\text{F}_5)_3$  (0.01 mmol, 5 mol%, 5.2 mg), 4-MeO-pyridine (0.01 mmol, 5 mol%, 1.1 mg),  $\text{C}_6\text{H}_4\text{CH}_2\text{CH}_2\text{SSOMe}$  (0.2 mmol, 1 equivalent, 42.3 mg) in

DCE (0.25 mL) at r.t. for 22 hours afforded compound **3e** in 67% yield (40.1 mg) as a colorless oil according to the general procedure A.  **$^1\text{H}$  NMR** (400 MHz,  $\text{CDCl}_3$ )  $\delta$  17.05 (s, 1H), 7.32 (t,  $J = 7.3$  Hz, 2H), 7.26-7.17 (m, 3H), 3.03 (s, 4H), 2.49 (s, 6H).  **$^{13}\text{C}$  NMR** (100 MHz,  $\text{CDCl}_3$ )  $\delta$  197.3, 139.6, 128.6, 128.5, 126.6, 107.7, 38.8, 35.7, 24.8. **IR** (film) 2977, 2908, 1560, 1400, 1254, 1049, 907, 750, 701, 655. **HRMS** (EI) Calcd for  $\text{C}_{13}\text{H}_{16}\text{O}_2\text{S}_2$  268.0592, Found 268.0591.

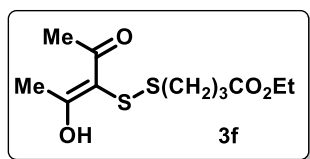

The reaction of acetylacetone (0.22 mmol, 1.1 equivalents, 22 mg),  $\text{B}(\text{C}_6\text{F}_5)_3$  (0.01 mmol, 5 mol%, 5.2 mg), 4-MeO-pyridine (0.01 mmol, 5 mol%, 1.1 mg),

EtO<sub>2</sub>C(CH<sub>2</sub>)<sub>3</sub>SSOMe (0.2 mmol, 1 equivalent, 42.1 mg) in DCE (0.25 mL) at r.t. for 22 hours afforded compound **3f** in 80% yield (44.5 mg) as a colorless oil according to the general procedure A. <sup>1</sup>H NMR (400 MHz, CDCl<sub>3</sub>) δ 17.01 (s, 1H), 4.11 (q, *J* = 7.1 Hz, 2H), 2.78 (t, *J* = 7.1 Hz, 2H), 2.45 (s, 6H), 2.41 (t, *J* = 7.3 Hz, 2H), 2.03 (p, *J* = 7.1 Hz, 2H), 1.24 (t, *J* = 7.1 Hz, 3H). <sup>13</sup>C NMR (100 MHz, CDCl<sub>3</sub>) δ 197.4, 172.7, 107.5, 60.4, 36.4, 32.6, 24.7, 24.3, 14.2. IR (film) 2980, 2914, 1732, 1564, 1406, 1120, 1041, 908, 790, 653. HRMS (EI) Calcd for C<sub>11</sub>H<sub>18</sub>O<sub>4</sub>S<sub>2</sub> 278.0647, Found 278.0652.

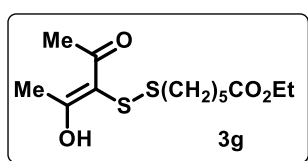

The reaction of acetylacetone (0.22 mmol, 1.1 equivalents, 22 mg), B(C<sub>6</sub>F<sub>5</sub>)<sub>3</sub> (0.01 mmol, 5 mol%, 5.2 mg), 4-MeO-pyridine (0.01 mmol, 5 mol%, 1.1 mg), EtO<sub>2</sub>C(CH<sub>2</sub>)<sub>5</sub>SSOMe (0.2 mmol, 1 equivalent, 47.7 mg) in DCE (0.25 mL) at r.t. for 22 hours afforded compound **3g** in 84% yield (46.8 mg) as a colorless oil according to the general procedure A. <sup>1</sup>H NMR (400 MHz, CDCl<sub>3</sub>) δ 17.00 (s, 1H), 4.10 (q, *J* = 7.1 Hz, 2H), 2.74 (t, *J* = 7.2 Hz, 2H), 2.44 (s, 6H), 2.28 (t, *J* = 7.4 Hz, 2H), 1.74-1.67 (m, 2H), 1.67-1.58 (m, 2H), 1.44-1.37 (m, 2H), 1.23 (t, *J* = 7.2 Hz, 3H). <sup>13</sup>C NMR (100 MHz, CDCl<sub>3</sub>) δ 197.3, 173.4, 107.7, 60.2, 37.2, 34.0, 28.8, 28.0, 24.7, 24.4, 14.2. IR (film) 2936, 1733, 1568, 1425, 1182, 987, 915, 732, 653. HRMS (EI) Calcd for C<sub>13</sub>H<sub>22</sub>O<sub>4</sub>S<sub>2</sub> 306.0960, Found 306.0957.

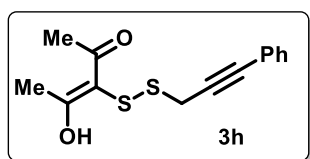

The reaction of acetylacetone (0.22 mmol, 1.1 equivalents, 22 mg), B(C<sub>6</sub>F<sub>5</sub>)<sub>3</sub> (0.01 mmol, 5 mol%, 5.2 mg), 4-MeO-pyridine (0.01 mmol, 5 mol%, 1.1 mg), C<sub>6</sub>H<sub>5</sub>CCCH<sub>2</sub>SSOMe (0.2 mmol, 1 equivalent, 42.1 mg) in DCE (0.25 mL) at r.t. for 22 hours afforded compound **3h** in 44% yield (24.5 mg) as a colorless oil according to the general procedure A. <sup>1</sup>H NMR (400 MHz, CDCl<sub>3</sub>) δ 17.10 (s, 1H), 7.43-7.40 (m, 2H), 7.34-7.29 (m, 3H), 3.76 (s, 2H), 2.53 (s, 6H). <sup>13</sup>C NMR (100 MHz, CDCl<sub>3</sub>) δ 197.6, 131.7, 128.4, 128.3, 122.6, 107.1, 84.7, 84.5, 26.8, 24.8. IR (film) 2977, 2904, 2189, 1696, 1573, 1404, 1226, 1067, 891, 756, 692. HRMS (EI) Calcd for C<sub>14</sub>H<sub>14</sub>O<sub>2</sub>S<sub>2</sub> 278.0435, Found 278.0428.

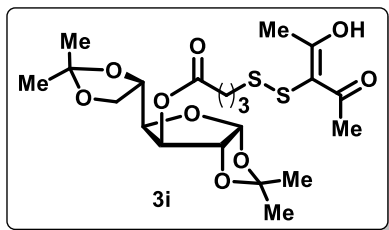

The reaction of acetylacetone (0.22 mmol, 1.1 equivalents, 22 mg),  $B(C_6F_5)_3$  (0.01 mmol, 5 mol%, 5.2 mg), 4-MeO-pyridine (0.01 mmol, 5 mol%, 1.1 mg), RSSOMe (0.2 mmol, 1 equivalent, 84.9 mg) in DCE (0.25 mL) at r.t. for 22 hours afforded compound **3i** in 75% yield (73.8 mg) as a colorless oil according to the general procedure A.  **$^1H$  NMR** (400 MHz,  $CDCl_3$ )  $\delta$  17.01 (s, 1H), 5.85 (d,  $J = 3.6$  Hz, 1H), 5.25 (s, 1H), 4.46 (d,  $J = 3.6$  Hz, 1H), 4.16 (s, 2H), 4.07-4.05 (m, 1H), 3.99 (d,  $J = 6.4$  Hz, 1H), 2.78 (t,  $J = 6.8$  Hz, 2H), 2.50-2.36 (m, 8H), 2.13-2.00 (m, 2H), 1.49 (s, 3H), 1.37 (s, 3H), 1.28 (s, 6H).  **$^{13}C$  NMR** (100 MHz,  $CDCl_3$ )  $\delta$  197.3, 171.3, 112.2, 109.3, 107.5, 105.0, 83.3, 79.8, 76.1, 72.4, 67.3, 36.2, 32.4, 26.8, 26.6, 26.1, 25.2, 24.7, 24.1. **IR** (film) 2980, 2901, 1744, 1566, 1405, 1379, 1253, 1070, 887, 847, 738, 639. **HRMS** (EI) Calcd for  $C_{21}H_{32}O_9S_2$  492.1488, Found 492.1483.

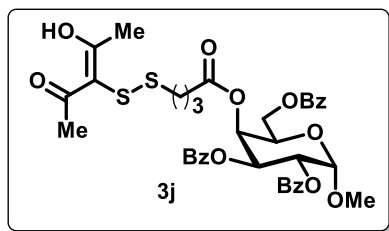

The reaction of acetylacetone (0.22 mmol, 1.1 equivalents, 22 mg),  $B(C_6F_5)_3$  (0.01 mmol, 5 mol%, 5.2 mg), 4-MeO-pyridine (0.01 mmol, 5 mol%, 1.1 mg), RSSOMe (0.2 mmol, 1 equivalent, 134.2 mg) in DCE (0.25 mL) at r.t. for 22 hours afforded compound **3j** in 81% yield (119.6 mg) as a white solid according to the general procedure A.  **$^1H$  NMR** (400 MHz,  $CDCl_3$ )  $\delta$  16.93 (s, 1H), 7.94 (d,  $J = 7.5$  Hz, 2H), 7.90 (d,  $J = 7.5$  Hz, 2H), 7.79 (d,  $J = 7.5$  Hz, 2H), 7.49-7.31 (m, 5H), 7.29-7.17 (m, 4H), 5.79-5.75 (m, 2H), 5.52 (d of ABq,  $J = 10.5, 3.4$  Hz, 1H), 5.14 (d,  $J = 3.3$  Hz, 1H), 4.45-4.40 (m, 2H), 4.31-4.26 (m, 1H), 3.37 (s, 3H), 2.53 (dt,  $J = 17.8, 7.1$  Hz, 4H), 2.31 (s, 6H), 2.00-1.86 (m, 2H).  **$^{13}C$  NMR** (100 MHz,  $CDCl_3$ )  $\delta$  197.3, 171.7, 165.9, 165.8, 165.3, 133.3, 133.2, 129.7, 129.6, 129.4, 129.4, 129.1, 129.1, 128.4, 128.3, 107.4, 97.5, 68.8, 68.5, 68.3, 66.4, 62.1, 55.6, 35.9, 32.1, 24.6, 24.6, 24.1. **IR** (film) 2977, 2907, 1723, 1597, 1449, 1404, 1261, 1067, 902, 709. **HRMS** (EI) Calcd for  $C_{37}H_{38}O_{12}S_2$  738.1805, Found 738.1799.

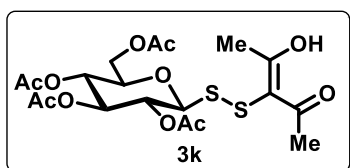

The reaction of acetylacetone (0.22 mmol, 1.1 equivalents, 22 mg),  $B(C_6F_5)_3$  (0.01 mmol, 5 mol%, 5.2 mg), 4-MeO-pyridine (0.01 mmol, 5 mol%, 1.1

mg), RSSOMe (0.2 mmol, 1 equivalent, 85.3 mg) in DCE (0.25 mL) at r.t. for 22 hours afforded compound **3k** in 60% yield (59.3 mg) as a white solid according to the general procedure A. **<sup>1</sup>H NMR** (400 MHz, CDCl<sub>3</sub>)  $\delta$  17.09 (s, 1H), 5.24-5.18 (m, 2H), 5.09 (t,  $J$  = 9.4 Hz, 1H), 4.65 (d,  $J$  = 9.3 Hz, 1H), 4.28 (d of ABq,  $J$  = 12.6, 4.6 Hz, 1H), 4.06 (d,  $J$  = 11.3 Hz, 1H), 3.73 (dd,  $J$  = 10.0, 2.6 Hz, 1H), 2.49 (s, 6H), 2.09 (s, 3H), 2.04 (s, 3H), 2.02 (s, 3H), 2.01 (s, 3H). **<sup>13</sup>C NMR** (100 MHz, CDCl<sub>3</sub>)  $\delta$  197.6, 170.5, 170.1, 169.3, 169.1, 107.5, 87.5, 76.6, 73.8, 69.6, 67.8, 61.9, 24.9, 20.7, 20.6, 20.5(3), 20.5(0). **IR** (film) 2996, 2954, 2895, 1745, 1567, 1370, 1213, 1083, 1052, 1032, 907, 733, 674. **HRMS** (ESI) Calcd for C<sub>19</sub>H<sub>26</sub>O<sub>11</sub>S<sub>2</sub> (M+Na<sup>+</sup>) 517.0809, Found 517.0809.

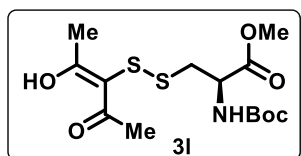

The reaction of acetylacetone (0.22 mmol, 1.1 equivalents, 22 mg), B(C<sub>6</sub>F<sub>5</sub>)<sub>3</sub> (0.01 mmol, 5 mol%, 5.2 mg), 4-MeO-pyridine (0.01 mmol, 5 mol%, 1.1 mg), RSSOMe (0.2 mmol, 1 equivalent, 59.5 mg) in DCE (0.25 mL) at r.t. for 22 hours afforded compound **3l** in 60% yield (58.4 mg) as a colorless oil according to the general procedure A. **<sup>1</sup>H NMR** (400 MHz, CDCl<sub>3</sub>)  $\delta$  17.07 (s, 1H), 5.30 (d,  $J$  = 6.9 Hz, 1H), 4.66 (d,  $J$  = 5.5 Hz, 1H), 3.76 (s, 3H), 3.25 (dd,  $J$  = 13.8, 4.4 Hz, 1H), 3.13 (dd,  $J$  = 13.8, 5.5 Hz, 1H), 2.45 (s, 6H), 1.43 (s, 9H). **<sup>13</sup>C NMR** (100 MHz, CDCl<sub>3</sub>)  $\delta$  197.6, 171.0, 155.0, 107.5, 80.3, 53.1, 52.7, 40.4, 28.2, 24.8. **IR** (film) 3373, 2939, 1756, 1682, 1516, 1363, 1289, 1216, 1163, 1022, 976, 868, 781, 709. **HRMS** (EI) Calcd for C<sub>14</sub>H<sub>23</sub>NO<sub>6</sub>S<sub>2</sub> 365.0967, Found 365.0965.

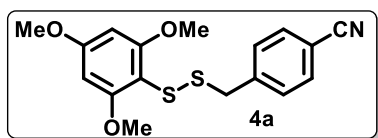

The reaction of 1,3,5-trimethoxybenzene (0.3mmol, 1.5 equivalents, 50.5 mg), B(C<sub>6</sub>F<sub>5</sub>)<sub>3</sub> (0.01 mmol, 5 mol%, 5.2 mg), 4-NCC<sub>6</sub>H<sub>4</sub>CH<sub>2</sub>SSOMe (0.2 mmol, 1 equivalent, 42.3 mg) in toluene (0.5 mL) at 0 °C for 24 hours afforded compound **4a** in 70% yield (48.6 mg) as a white solid according to the general procedure B. **<sup>1</sup>H NMR** (400 MHz, CDCl<sub>3</sub>)  $\delta$  7.57 (d,  $J$  = 8.3 Hz, 2H), 7.46 (d,  $J$  = 8.3 Hz, 2H), 6.13 (s, 2H), 4.03 (s, 2H), 3.87 (s, 6H), 3.84 (s, 3H). **<sup>13</sup>C NMR** (100 MHz, CDCl<sub>3</sub>)  $\delta$  163.1, 162.2, 144.1, 132.1, 129.8, 119.0, 110.7, 104.4, 91.1, 56.2, 56.2, 55.5, 43.0. **IR** (film) 2967, 2925, 2225, 1580, 1451, 1407, 1227, 1120, 1081, 841, 808, 646. **HRMS** (EI) Calcd for C<sub>17</sub>H<sub>17</sub>NO<sub>3</sub>S<sub>2</sub> 347.0650, Found 347.0645.

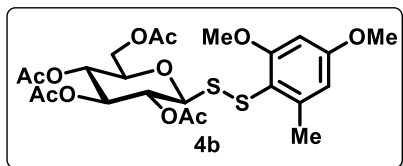

The reaction of 1,3-dimethoxy-5-methylbenzene (0.3mmol, 1.5 equivalents, 45.7 mg),  $B(C_6F_5)_3$  (0.01 mmol, 5 mol%, 5.2 mg), RSSOMe (0.2 mmol, 1 equivalent, 85.3 mg) in toluene (0.5 mL)

at r.t. for 60 hours afforded compound **4b** in 48% yield (52.5 mg) as a white solid according to the general procedure B.  **$^1H$  NMR** (400 MHz,  $CDCl_3$ )  $\delta$  6.39 (d,  $J = 2.4$  Hz, 1H), 6.32 (d,  $J = 2.4$  Hz, 1H), 5.24-5.13 (m, 2H), 5.08 (t,  $J = 9.6$  Hz, 1H), 4.84 (d,  $J = 9.8$  Hz, 1H), 4.21 (d of ABq,  $J = 12.3, 4.8$  Hz, 1H), 4.02 (d of ABq,  $J = 12.3, 2.4$  Hz, 1H), 3.90 (s, 3H), 3.79 (s, 3H), 3.70 (ddd,  $J = 10.0, 4.7, 2.4$  Hz, 1H), 2.52 (s, 3H), 2.05 (s, 3H), 2.02 (s, 3H), 2.00 (s, 3H), 1.87 (s, 3H).  **$^{13}C$  NMR** (100 MHz,  $CDCl_3$ )  $\delta$  170.6, 170.2, 169.4, 169.2, 161.9, 161.6, 145.3, 115.4, 107.2, 96.7, 89.8, 76.2, 74.0, 70.0, 68.3, 62.2, 56.1, 55.3, 21.9, 20.7, 20.5(9), 20.5(6), 20.4(6). **IR** (film) 2977, 2903, 1750, 1588, 1455, 1375, 1223, 1048, 907, 811, 733. **HRMS** (EI) Calcd for  $C_{23}H_{30}O_{11}S_2$  546.1230, Found 546.1238.

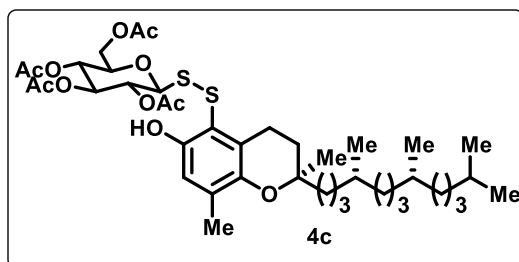

The reaction of (+)-d-tocopherol (0.3mmol, 1.5 equivalents, 120.8 mg),  $B(C_6F_5)_3$  (0.01 mmol, 5 mol%, 5.2 mg), RSSOMe (0.2 mmol, 1 equivalent, 85.3 mg) in toluene (0.5 mL) at r.t. for 60 hours afforded compound **4c** in 40% yield (63.7

mg) as a white solid according to the general procedure B.  **$^1H$  NMR** (400 MHz,  $CDCl_3$ )  $\delta$  6.66 (s, 1H), 6.45 (s, 1H), 5.26-5.10 (m, 3H), 4.56 (d,  $J = 9.6$  Hz, 1H), 4.29-4.18 (m, 2H), 3.86-3.82 (m, 1H), 3.01-2.77 (m, 2H), 2.14 (s, 3H), 2.11 (s, 3H), 2.03 (s, 3H), 2.00 (s, 3H), 2.00 (s, 3H), 1.84-1.72 (m, 2H), 1.57-1.46 (m, 3H), 1.42-1.32 (m, 4H), 1.31-1.19 (m, 10H), 1.18-0.99 (m, 7H), 0.90-0.79 (m, 12H).  **$^{13}C$  NMR** (100 MHz,  $CDCl_3$ )  $\delta$  170.7, 170.1, 169.3, 169.2, 151.1, 146.3, 132.4, 124.3, 115.6, 115.0, 84.4, 76.6, 75.2, 73.7, 70.1, 68.2, 61.9, 39.9, 39.4, 37.5(1), 37.4(5), 37.4, 37.3, 32.8, 32.7, 31.3, 28.0, 24.8, 24.4, 23.7, 22.7, 22.6, 22.2, 21.0, 20.7(1) 20.7(0), 20.6, 19.7, 19.6, 16.5(1), 16.4(9). **IR** (film) 3449, 2958, 2929, 1752, 1458, 1372, 1217, 1048, 911, 734, 646. **HRMS** (EI) Calcd for  $C_{41}H_{64}O_{11}S_2$  796.3890, Found 796.3884.

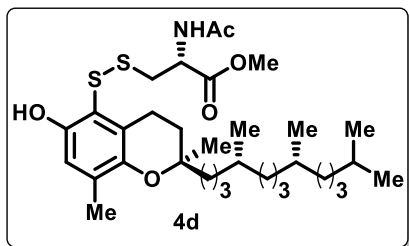

The reaction of (+)-d-tocopherol (0.3mmol, 1.5 equivalents, 120.8 mg),  $B(C_6F_5)_3$  (0.01 mmol, 5 mol%, 5.2 mg), RSSOMe (0.2 mmol, 1 equivalent, 47.9 mg) in toluene (0.5 mL) at r.t. for 60 hours afforded compound **4d** in 53% yield (64.5 mg) as a white solid according to the general procedure B.  **$^1H$  NMR** (400 MHz,  $CDCl_3$ )  $\delta$  6.69 (s, 1H), 6.64-6.15 (m, 2H), 4.95 (dt,  $J = 10.3, 5.1$  Hz, 1H), 3.79 (s, 3H), 3.34-3.23 (m, 2H), 2.90-2.85 (m, 2H), 2.14 (s, 3H), 2.03 (s, 3H), 1.84-1.73 (m, 2H), 1.56-1.02 (m, 24H), 0.90-0.76 (m, 12H).  **$^{13}C$  NMR** (100 MHz,  $CDCl_3$ )  $\delta$  171.0, 170.3, 150.6, 146.4, 131.9, 123.9, 116.1, 115.6, 75.2, 52.9, 52.4, 40.4, 40.0, 39.3, 37.4, 37.3(8), 37.3, 32.8, 32.7, 31.3, 27.9, 24.8, 24.4, 23.7, 23.1, 22.7, 22.6, 22.0, 20.9, 19.7, 19.6, 16.5, 16.4(5). **IR** (film) 3299, 2978, 2902, 1747, , 1462, 1555, 1446, 1406, 1253, 1957, 874, 754, 648. **HRMS** (EI) Calcd for  $C_{33}H_{55}NO_5S_2$  609.3522, Found 609.3527.

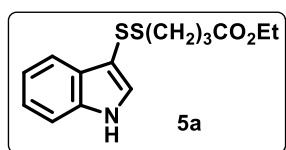

The reaction of indole (0.3 mmol, 1.5 equivalents),  $MeSO_3H$  (0.02 mmol, 10 mol%, 2.0 mg),  $EtO_2C(CH_2)_3SSOMe$  (0.2 mmol, 1 equivalent, 42.1 mg) in *t*-AmylOH (0.5 mL) at 0 °C for 5 hours afforded compound **5a** in 78% yield (46.0 mg) as a white solid according to the general procedure C<sub>1</sub>.  **$^1H$  NMR** (400 MHz,  $CDCl_3$ )  $\delta$  8.47 (s, 1H), 7.83-7.81 (m, 1H), 7.38-7.34 (m, 2H), 7.27-7.21 (m, 2H), 4.12 (q,  $J = 7.1$  Hz, 2H), 2.76 (t,  $J = 7.0$  Hz, 2H), 2.41 (t,  $J = 7.3$  Hz, 2H), 2.10 (p,  $J = 7.2$  Hz, 2H), 1.24 (t,  $J = 7.1$  Hz, 3H).  **$^{13}C$  NMR** (100 MHz,  $CDCl_3$ )  $\delta$  173.2, 136.3, 130.1, 128.6, 123.2, 121.1, 119.5, 111.6, 108.1, 60.4, 37.6, 32.8, 23.8, 14.3. **IR** (film) 3398, 2926, 1714, 1497, 1453, 1410, 1375, 1340, 1277, 1211, 1131, 1095, 1035, 745. **HRMS** (EI) Calcd for  $C_{15}H_{19}NO_2S_2$  295.0701, Found 295.0705.

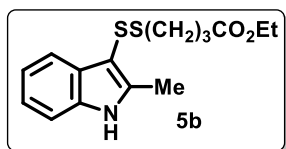

The reaction of 2-methylindole (0.3 mmol, 1.5 equivalents, 39.4 mg),  $MeSO_3H$  (0.02 mmol, 10 mol%, 2 mg),  $EtO_2C(CH_2)_3SSOMe$  (0.2 mmol, 1 equivalent, 42.1 mg) in *t*-AmylOH (0.5 mL) at 0 °C for 5 hours afforded compound **5b** in 80% yield (49.2 mg) as a white solid according to the general procedure C<sub>1</sub>.  **$^1H$  NMR** (400 MHz,  $DMSO-d_6$ )  $\delta$  7.93 (d,  $J = 1.6$  Hz, 1H), 7.73 (d,  $J = 2.7$  Hz, 1H), 7.46 (dd,  $J = 8.5, 1.7$  Hz, 1H), 7.31 (d,  $J = 8.4$  Hz, 1H), 4.05 (q,  $J = 7.1$  Hz, 2H), 3.32 (s,

3H), 2.74 (t,  $J = 7.3$  Hz, 2H), 2.37 (t,  $J = 7.3$  Hz, 2H), 1.96 (p,  $J = 7.3$  Hz, 2H), 1.17 (t,  $J = 7.1$  Hz, 3H).  $^{13}\text{C}$  NMR (100 MHz, DMSO- $d_6$ )  $\delta$  172.3, 135.6, 133.1, 130.9, 130.2, 126.8, 114.7, 103.9, 84.3, 59.8, 36.6, 32.0, 23.6, 14.1. IR (film) 3305, 2927, 1707, 1539, 1449, 1399, 1309, 1226, 1183, 1020, 859, 744, 674. HRMS (EI) Calcd for  $\text{C}_{15}\text{H}_{19}\text{NO}_2\text{S}_2$  309.0857, Found 309.0851.

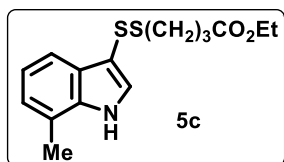

The reaction of 7-methylindole (0.3 mmol, 1.5 equivalents, 39.4 mg),  $\text{MeSO}_3\text{H}$  (0.02 mmol, 10 mol%, 2 mg),  $\text{EtO}_2\text{C}(\text{CH}_2)_3\text{SSOMe}$  (0.2 mmol, 1 equivalent, 42.1 mg) in *t*-AmylOH (0.5 mL) at 0 °C for 5 hours afforded compound **5c** in 71% yield (43.9 mg) as a white solid according to the general procedure C<sub>1</sub>.  $^1\text{H}$  NMR (400 MHz,  $\text{CDCl}_3$ )  $\delta$  8.40 (s, 1H), 7.68 (d,  $J = 7.9$  Hz, 1H), 7.41 (d,  $J = 2.6$  Hz, 1H), 7.17 (t,  $J = 7.5$  Hz, 1H), 7.06 (d,  $J = 7.1$  Hz, 1H), 4.14 (q,  $J = 7.1$  Hz, 2H), 2.78 (t,  $J = 7.0$  Hz, 2H), 2.48 (s, 3H), 2.43 (t,  $J = 7.3$  Hz, 2H), 2.12 (p,  $J = 7.2$  Hz, 2H), 1.26 (t,  $J = 7.1$  Hz, 3H).  $^{13}\text{C}$  NMR (100 MHz,  $\text{CDCl}_3$ )  $\delta$  173.2, 135.8, 129.9, 128.2, 123.6, 121.1, 120.8, 117.1, 108.3, 60.4, 37.5, 32.8, 23.8, 16.4, 14.2. IR (film) 3303, 2929, 1718, 1612, 1497, 1417, 1375, 1346, 1213, 1178, 1031, 779, 747, 666. HRMS (EI) Calcd for  $\text{C}_{15}\text{H}_{19}\text{NO}_2\text{S}_2$  309.0857, Found 309.0862.

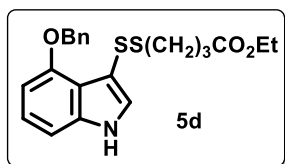

The reaction of 4-benzyloxyindole (0.3 mmol, 1.5 equivalents, 67.0 mg),  $\text{MeSO}_3\text{H}$  (0.02 mmol, 10 mol%, 2 mg),  $\text{EtO}_2\text{C}(\text{CH}_2)_3\text{SSOMe}$  (0.2 mmol, 1 equivalent, 42.1 mg) in *t*-AmylOH (0.5 mL) at 0 °C for 5 hours afforded compound **5d** in 75% yield (60.1 mg) as a white solid according to the general procedure C<sub>1</sub>.  $^1\text{H}$  NMR (400 MHz,  $\text{CDCl}_3$ )  $\delta$  8.39 (s, 1H), 7.59 (d,  $J = 7.4$  Hz, 2H), 7.37 (t,  $J = 7.4$  Hz, 2H), 7.29 (d,  $J = 7.3$  Hz, 1H), 7.22 (d,  $J = 4.5$  Hz, 1H), 7.08 (t,  $J = 7.9$  Hz, 1H), 6.92 (d,  $J = 8.1$  Hz, 1H), 6.62 (d,  $J = 7.8$  Hz, 1H), 5.23 (s, 2H), 4.06 (q,  $J = 7.1$  Hz, 2H), 2.71 (t,  $J = 7.0$  Hz, 2H), 2.29 (t,  $J = 7.3$  Hz, 2H), 2.03 - 1.68 (m, 2H), 1.20 (t,  $J = 7.1$  Hz, 3H).  $^{13}\text{C}$  NMR (100 MHz,  $\text{CDCl}_3$ )  $\delta$  173.3, 153.4, 138.4, 137.3, 128.9, 128.4, 127.5, 127.1, 123.9, 117.7, 107.5, 105.1, 102.7, 70.1, 60.3, 36.5, 32.7, 24.1, 14.2. IR (film) 3376, 2982, 1726, 1583, 1508, 1314, 1247, 1087, 778, 736, 696. HRMS (EI) Calcd for  $\text{C}_{21}\text{H}_{23}\text{NO}_3\text{S}_2$  401.1119, Found 401.1124.

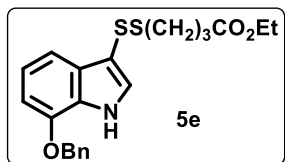

The reaction of 7-benzyloxyindole (0.3 mmol, 1.5 equivalents, 67.0 mg), MeSO<sub>3</sub>H (0.02 mmol, 10 mol%, 2 mg), EtO<sub>2</sub>C(CH<sub>2</sub>)<sub>3</sub>SSOMe (0.2 mmol, 1 equivalent, 42.1 mg) in *t*-AmylOH (0.5 mL) at 0 °C for 5 hours afforded compound **5e**

in 85% yield (68.2 mg) as a white solid according to the general procedure C<sub>1</sub>. **<sup>1</sup>H NMR** (400 MHz, CDCl<sub>3</sub>) δ 8.59 (s, 1H), 7.70 - 7.32 (m, 7H), 7.14 (t, *J* = 7.9 Hz, 1H), 6.78 (d, *J* = 7.7 Hz, 1H), 5.20 (s, 2H), 4.13 (q, *J* = 7.1 Hz, 2H), 2.77 (t, *J* = 7.0 Hz, 2H), 2.42 (t, *J* = 7.3 Hz, 2H), 2.11 (p, *J* = 7.2 Hz, 2H), 1.25 (t, *J* = 7.1 Hz, 3H). **<sup>13</sup>C NMR** (100 MHz, CDCl<sub>3</sub>) δ 173.1, 145.5, 136.7, 130.1, 129.6, 128.6, 128.2, 127.8, 127.0, 121.4, 112.3, 108.3, 104.1, 70.3, 60.4, 37.5, 32.7, 23.7, 14.2. **IR** (film) 3395, 2983, 1719, 1579, 1410, 1310, 1252, 1081, 1006, 855, 780, 735, 696. **HRMS** (EI) Calcd for C<sub>21</sub>H<sub>23</sub>NO<sub>3</sub>S<sub>2</sub> 401.1119, Found 401.1127.

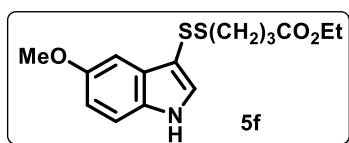

The reaction of 5-methoxyindole (0.3 mmol, 1.5 equivalents, 44.2 mg), MeSO<sub>3</sub>H (0.02 mmol, 10 mol%, 2 mg), EtO<sub>2</sub>C(CH<sub>2</sub>)<sub>3</sub>SSOMe (0.2 mmol, 1 equivalent, 42.1

mg) in *t*-AmylOH (0.5 mL) at 0 °C for 5 hours afforded compound **5f** in 77% yield (49.9 mg) as a white solid according to the general procedure C<sub>1</sub>. **<sup>1</sup>H NMR** (400 MHz, CDCl<sub>3</sub>) δ 8.47 (s, 1H), 7.36 (d, *J* = 2.7 Hz, 1H), 7.25-7.23 (m, 2H), 6.90 (dd, *J* = 8.8, 2.5 Hz, 1H), 4.13 (q, *J* = 7.1 Hz, 2H), 3.89 (s, 3H), 2.77 (t, *J* = 7.0 Hz, 2H), 2.42 (t, *J* = 7.3 Hz, 2H), 2.11 (p, *J* = 7.2 Hz, 2H), 1.25 (t, *J* = 7.1 Hz, 3H). **<sup>13</sup>C NMR** (100 MHz, CDCl<sub>3</sub>) δ 173.2, 155.1, 131.2, 130.8, 129.2, 113.5, 112.5, 107.0, 100.7, 60.4, 55.8, 37.3, 32.7, 23.7, 14.2. **IR** (film) 3348, 2982, 1716, 1485, 1287, 1206, 1169, 1033, 747, 630. **HRMS** (EI) Calcd for C<sub>15</sub>H<sub>19</sub>NO<sub>3</sub>S<sub>2</sub> 325.0806, Found 325.0811.

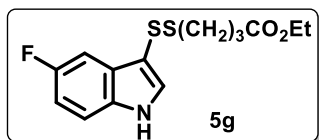

The reaction of 5-fluoroindole (0.3 mmol, 1.5 equivalents, 40.6 mg), MeSO<sub>3</sub>H (0.02 mmol, 10 mol%, 2 mg), EtO<sub>2</sub>C(CH<sub>2</sub>)<sub>3</sub>SSOMe (0.2 mmol, 1 equivalent, 42.1 mg) in *t*-AmylOH (0.5 mL) at 0 °C for 5 hours afforded compound

**5g** in 68% yield (42.6 mg) as a white solid according to the general procedure C<sub>1</sub>. **<sup>1</sup>H NMR** (400 MHz, DMSO-*d*<sub>6</sub>) δ 7.79 (d, *J* = 2.7 Hz, 1H), 7.45 (dd, *J* = 8.8, 4.4 Hz, 1H), 7.33 (dd, *J* = 9.5, 2.5 Hz, 1H), 7.04 (td, *J* = 9.2, 2.6 Hz, 1H), 4.05 (q, *J* = 7.1 Hz, 2H), 2.86 - 2.50 (m, 2H), 2.37 (t, *J* = 7.2 Hz, 2H), 1.96 (p, *J* = 7.3 Hz, 2H), 1.16 (t, *J* = 7.1

Hz, 3H). **<sup>19</sup>F NMR** (376 MHz, DMSO-d<sub>6</sub>)  $\delta$  -123.02. **<sup>13</sup>C NMR** (100 MHz, DMSO-d<sub>6</sub>)  $\delta$  172.3, 157.8 (d,  $^1J_{C-F}$  = 234.0 Hz), 134.1, 133.0, 129.0 (d,  $^3J_{C-F}$  = 10.0 Hz), 113.5 (d,  $^3J_{C-F}$  = 9.7 Hz), 110.5 (d,  $^2J_{C-F}$  = 26.1 Hz), 104.8 (d,  $^4J_{C-F}$  = 4.7 Hz, 3H), 103.1 (d,  $^2J_{C-F}$  = 23.9 Hz), 59.8, 36.7, 32.0, 23.7, 14.0. **IR** (film) 3320, 2934, 1725, 1484, 1457, 1278, 1156, 1026, 929, 855, 800, 621. **HRMS** (EI) Calcd for C<sub>14</sub>H<sub>16</sub>FNO<sub>2</sub>S<sub>2</sub> 313.0607, Found 313.0607.

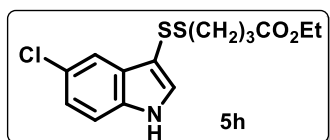

The reaction of 5-chloroindole (0.3 mmol, 1.5 equivalents, 44.2 mg), MeSO<sub>3</sub>H (0.02 mmol, 10 mol%, 2 mg), EtO<sub>2</sub>C(CH<sub>2</sub>)<sub>3</sub>SSOMe (0.2 mmol, 1 equivalent, 42.1 mg) in *t*-AmylOH (0.5 mL) at 0 °C for 5 hours afforded compound **5h** in 62% yield (40.8 mg) as a white solid according to the general procedure C<sub>1</sub>. **<sup>1</sup>H NMR** (400 MHz, DMSO-d<sub>6</sub>)  $\delta$  11.81 (s, 1H), 7.80 (s, 1H), 7.60 (d,  $J$  = 2.0 Hz, 1H), 7.47 (d,  $J$  = 8.6 Hz, 1H), 7.20 (dd,  $J$  = 8.6, 2.1 Hz, 1H), 4.05 (q,  $J$  = 7.1 Hz, 2H), 2.87 - 2.66 (m, 2H), 2.37 (t,  $J$  = 7.3 Hz, 2H), 1.96 (p,  $J$  = 7.3 Hz, 2H), 1.16 (t,  $J$  = 7.1 Hz, 3H). **<sup>13</sup>C NMR** (100 MHz, DMSO-d<sub>6</sub>)  $\delta$  172.3, 134.9, 133.8, 129.5, 125.1, 122.3, 117.5, 114.0, 104.4, 59.8, 36.7, 32, 23.6, 14.0. **IR** (film) 3264, 2990, 1695, 1408, 1315, 1230, 1187, 1103, 1018, 866, 799, 703. **HRMS** (EI) Calcd for C<sub>14</sub>H<sub>16</sub>ClNO<sub>2</sub>S<sub>2</sub> 329.0311, Found 329.0313.

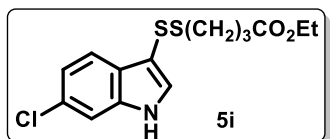

The reaction of 6-chloroindole (0.3 mmol, 1.5 equivalents, 44.2 mg), MeSO<sub>3</sub>H (0.02 mmol, 10 mol%, 2 mg), EtO<sub>2</sub>C(CH<sub>2</sub>)<sub>3</sub>SSOMe (0.2 mmol, 1 equivalent, 42.1 mg) in *t*-AmylOH (0.5 mL) at 0 °C for 5 hours afforded compound **5i** in 63% yield (41.5 mg) as a white solid according to the general procedure C<sub>1</sub>. **<sup>1</sup>H NMR** (400 MHz, CDCl<sub>3</sub>)  $\delta$  8.56 (s, 1H), 7.72 (d,  $J$  = 8.4 Hz, 1H), 7.52 - 7.29 (m, 2H), 7.20 (d,  $J$  = 8.2 Hz, 1H), 4.13 (q,  $J$  = 7.1 Hz, 2H), 2.76 (t,  $J$  = 7.0 Hz, 2H), 2.41 (t,  $J$  = 7.2 Hz, 2H), 2.29 - 1.90 (m, 2H), 1.25 (t,  $J$  = 7.1 Hz, 3H). **<sup>13</sup>C NMR** (100 MHz, CDCl<sub>3</sub>)  $\delta$  173.2, 136.6, 130.6, 129.0, 127.1, 121.7, 120.4, 111.6, 108.2, 60.5, 37.5, 32.7, 23.7, 14.2. **IR** (film) 3264, 2925, 1705, 1308, 1220, 1176, 1176, 1012, 903, 852, 807, 780, 695. **HRMS** (EI) Calcd for C<sub>14</sub>H<sub>16</sub>ClNO<sub>2</sub>S<sub>2</sub> 329.0311 Found 329.0310.

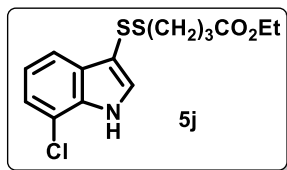

The reaction of 7-chloroindole (0.3 mmol, 1.5 equivalents, 44.2 mg), MeSO<sub>3</sub>H (0.02 mmol, 10 mol%, 2 mg), EtO<sub>2</sub>C(CH<sub>2</sub>)<sub>3</sub>SSOMe (0.2 mmol, 1 equivalent, 42.1 mg) in *t*-AmylOH (0.5 mL) at 0 °C for 5 hours afforded compound **5j** in 68% yield (44.8 mg) as a white solid according to the general procedure C<sub>1</sub>. **<sup>1</sup>H NMR** (400 MHz, CDCl<sub>3</sub>) δ 8.61 (s, 1H), 7.73 (d, *J* = 7.9 Hz, 1H), 7.50 (d, *J* = 2.6 Hz, 1H), 7.28 - 7.22 (m, 1H), 7.17 (t, *J* = 7.8 Hz, 1H), 4.13 (q, *J* = 7.1 Hz, 2H), 2.77 (t, *J* = 7.1 Hz, 2H), 2.41 (t, *J* = 7.2 Hz, 2H), 2.10 (p, *J* = 7.2 Hz, 2H), 1.25 (t, *J* = 7.1 Hz, 3H). **<sup>13</sup>C NMR** (100 MHz, CDCl<sub>3</sub>) δ 173.1, 133.5, 130.5, 130.0, 122.5, 121.8, 118.2, 117.0, 109.4, 60.4, 37.5, 32.6, 23.7, 14.2. **IR** (film) 3317, 2923, 1705, 1411, 1220, 1194, 1135, 1024, 835, 776, 734, 685. **HRMS** (EI) Calcd for C<sub>14</sub>H<sub>16</sub>ClNO<sub>2</sub>S<sub>2</sub> 329.0311, Found 329.0314.

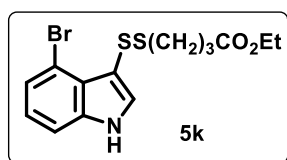

The reaction of 4-bromoindole (0.3 mmol, 1.5 equivalents, 58.9 mg), MeSO<sub>3</sub>H (0.02 mmol, 10 mol%, 2 mg), EtO<sub>2</sub>C(CH<sub>2</sub>)<sub>3</sub>SSOMe (0.2 mmol, 1 equivalent, 42.1 mg) in *t*-AmylOH (0.5 mL) at 0 °C for 5 hours afforded compound **5k** in 63% yield (47.1 mg) as a white solid according to the general procedure C<sub>1</sub>. **<sup>1</sup>H NMR** (400 MHz, DMSO-*d*<sub>6</sub>) δ 11.92 (s, 1H), 7.80 (d, *J* = 2.8 Hz, 1H), 7.47 (dd, *J* = 8.1, 0.7 Hz, 1H), 7.30 (dd, *J* = 7.6, 0.7 Hz, 1H), 7.07 (t, *J* = 7.9 Hz, 1H), 4.05 (q, *J* = 7.1 Hz, 2H), 2.74 (t, *J* = 7.2 Hz, 2H), 2.37 (t, *J* = 7.3 Hz, 2H), 1.98 (p, *J* = 7.3 Hz, 2H), 1.16 (t, *J* = 7.1 Hz, 3H). **<sup>13</sup>C NMR** (100 MHz, DMSO-*d*<sub>6</sub>) δ 172.3, 137.9, 134.6, 124.7, 124.7, 123.3, 113.2, 112.1, 105.2, 59.8, 35.2, 32.1, 24.0, 14. **IR** (film) 3100, 2933, 1725, 1436, 1306, 1183, 1001, 911, 776, 739. **HRMS** (EI) Calcd for C<sub>14</sub>H<sub>16</sub>BrNO<sub>2</sub>S<sub>2</sub> 372.9806, Found 372.9804.

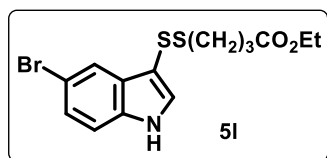

The reaction of 5-bromoindole (0.3 mmol, 1.5 equivalents, 58.9 mg), MeSO<sub>3</sub>H (0.02 mmol, 10 mol%, 2 mg), EtO<sub>2</sub>C(CH<sub>2</sub>)<sub>3</sub>SSOMe (0.2 mmol, 1 equivalent, 42.1 mg) in *t*-AmylOH (0.5 mL) at 0 °C for 5 hours afforded compound **5l** in 58% yield (43.4 mg) as a white solid according to the general procedure C<sub>1</sub>. **<sup>1</sup>H NMR** (400 MHz, DMSO-*d*<sub>6</sub>) δ 11.82 (s, 1H), 7.79 (d, *J* = 2.7 Hz, 1H), 7.74 (d, *J* = 1.8 Hz, 1H), 7.44-7.42 (m, 1H), 7.33 - 7.26 (m, 1H), 4.05 (q, *J* = 7.1

Hz, 2H), 2.74 (t,  $J = 7.2$  Hz, 2H), 2.37 (t,  $J = 7.3$  Hz, 2H), 1.96 (p,  $J = 7.3$  Hz, 2H), 1.17 (t,  $J = 7.1$  Hz, 3H).  **$^{13}\text{C}$  NMR** (100 MHz, DMSO- $d_6$ )  $\delta$  172.3, 135.2, 133.6, 130.1, 124.8, 120.6, 114.4, 113, 104.3, 59.8, 36.6, 32.0, 23.6, 14.0. **IR** (film) 3154, 2931, 1726, 1450, 1292, 1106, 1025, 881, 799, 756. **HRMS** (EI) Calcd for  $\text{C}_{14}\text{H}_{16}\text{BrNO}_2\text{S}_2$  372.9806, Found 372.9809.

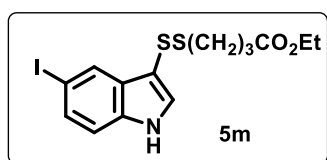

The reaction of 5-iodoindole (0.3 mmol, 1.5 equivalents, 72.9 mg),  $\text{MeSO}_3\text{H}$  (0.02 mmol, 10 mol%, 2 mg),  $\text{EtO}_2\text{C}(\text{CH}_2)_3\text{SSOMe}$  (0.2 mmol, 1 equivalent, 42.1 mg) in *t*-AmylOH (0.5 mL) at 0 °C for 5 hours afforded compound **5m** in 53% yield (44.6 mg) as a white solid according to the general procedure C<sub>1</sub>.  **$^1\text{H}$  NMR** (400 MHz, DMSO- $d_6$ )  $\delta$  11.78 (s, 1H), 7.93 (d,  $J = 1.6$  Hz, 1H), 7.73 (d,  $J = 2.7$  Hz, 1H), 7.46 (dd,  $J = 8.5, 1.7$  Hz, 1H), 7.31 (d,  $J = 8.4$  Hz, 1H), 4.05 (q,  $J = 7.1$  Hz, 2H), 2.74 (t,  $J = 7.2$  Hz, 2H), 2.37 (t,  $J = 7.3$  Hz, 2H), 1.96 (p,  $J = 7.3$  Hz, 2H), 1.17 (t,  $J = 7.1$  Hz, 3H).  **$^{13}\text{C}$  NMR** (100 MHz, DMSO- $d_6$ )  $\delta$  172.3, 135.5, 133.1, 130.9, 130.2, 126.8, 114.7, 103.9, 84.3, 59.8, 36.6, 32.0, 23.6, 14.1. **IR** (film) 3328, 2935, 1724, 1446, 1292, 1208, 1136, 1027, 876, 797. **HRMS** (EI) Calcd for  $\text{C}_{14}\text{H}_{16}\text{INO}_2\text{S}_2$  420.9667, Found 420.9673.

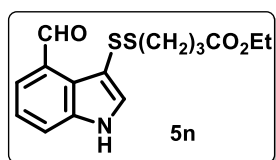

The reaction of indole-4-carboxaldehyde (0.3 mmol, 1.5 equivalents, 43.6 mg),  $\text{MeSO}_3\text{H}$  (0.02 mmol, 10 mol%, 2 mg),  $\text{EtO}_2\text{C}(\text{CH}_2)_3\text{SSOMe}$  (0.2 mmol, 1 equivalent, 42.1 mg) in *t*-AmylOH (0.5 mL) at 0 °C for 24 hours afforded compound **5n** in 39% yield (25.2 mg) as a white solid according to the general procedure C<sub>1</sub>.  **$^1\text{H}$  NMR** (400 MHz,  $\text{CDCl}_3$ )  $\delta$  11.44 (s, 1H), 9.20 (s, 1H), 7.91 (d,  $J = 7.5$  Hz, 1H), 7.72 - 7.57 (m, 2H), 7.34 (t,  $J = 7.7$  Hz, 1H), 4.11 (q,  $J = 7.1$  Hz, 2H), 2.73 (t,  $J = 7.1$  Hz, 2H), 2.40 (t,  $J = 7.2$  Hz, 2H), 2.06 (p,  $J = 7.3$  Hz, 2H), 1.24 (t,  $J = 7.1$  Hz, 4H).  **$^{13}\text{C}$  NMR** (100 MHz,  $\text{CDCl}_3$ )  $\delta$  192.2, 173.2, 138.2, 133.8, 130.1, 127.4, 122.8, 121.2, 117.9, 106.3, 60.5, 36.2, 32.6, 23.8, 14.2. **IR** (film) 3314, 2932, 1728, 1673, 1609, 1414, 1386, 1345, 1259, 1210, 1126, 1035, 998, 792, 748. **HRMS** (EI) Calcd for  $\text{C}_{15}\text{H}_{17}\text{NO}_3\text{S}_2$  323.0650, Found 323.0655.

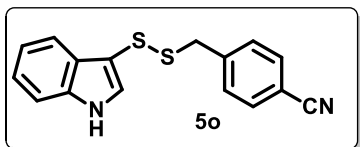

The reaction of indole (0.22 mmol, 1.1 equivalents, 25.8 mg),  $\text{B}(\text{C}_6\text{F}_5)_3$  (0.002 mmol, 1 mol%, 1 mg), 4-NCC<sub>6</sub>H<sub>4</sub>SSOMe (0.2 mmol, 1 equivalent, 42.3 mg) in toluene (0.25 mL) at 0 °C for 24 hours afforded compound **5o** in 86% yield (51.0 mg) as a white solid according to the general procedure C<sub>2</sub>. **<sup>1</sup>H NMR** (400 MHz, DMSO-d<sub>6</sub>)  $\delta$  11.65 (s, 1H), 7.79 (d,  $J$  = 6.8 Hz, 2H), 7.70 - 7.60 (m, 2H), 7.57 (d,  $J$  = 6.8 Hz, 2H), 7.45 (d,  $J$  = 8.0 Hz, 1H), 7.26 - 7.03 (m, 2H), 4.04 (s, 2H). **<sup>13</sup>C NMR** (100 MHz, DMSO-d<sub>6</sub>)  $\delta$  144.8, 137.5, 133.4, 133.2, 131.4, 129.2, 123.3, 121.2, 119.9, 119.5, 113.3, 110.8, 104.9, 42.1. **IR** (film) 3311, 2985, 2903, 2232, 1408, 1234, 1058, 868, 827, 772, 654. **HRMS** (EI) Calcd for C<sub>16</sub>H<sub>12</sub>N<sub>2</sub>S<sub>2</sub> 296.0442, Found 296.0449.

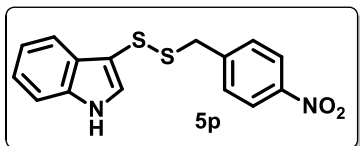

The reaction of indole (0.22 mmol, 1.1 equivalents, 25.8 mg),  $\text{B}(\text{C}_6\text{F}_5)_3$  (0.002 mmol, 1 mol%, 1 mg), 4-NO<sub>2</sub>C<sub>6</sub>H<sub>4</sub>SSOMe (0.2 mmol, 1 equivalent, 46.3 mg) in toluene (0.25 mL) at 0 °C for 24 hours afforded compound **5p** in 99% yield (64.5 mg) as a white solid according to the general procedure C<sub>2</sub>. **<sup>1</sup>H NMR** (400 MHz, DMSO-d<sub>6</sub>)  $\delta$  11.63 (s, 1H), 8.17 (d,  $J$  = 8.5 Hz, 2H), 7.71-7.53 (m, 4H), 7.44 (d,  $J$  = 8.0 Hz, 1H), 7.25-7.07 (m, 2H), 4.10 (s, 2H). **<sup>13</sup>C NMR** (100 MHz, DMSO-d<sub>6</sub>)  $\delta$  146.47, 145.98, 136.41, 132.31, 130.51, 128.15, 123.35, 122.21, 120.20, 118.40, 112.22, 103.87, 40.8. **IR** (film) 3391, 2980, 2901, 1448, 1403, 1203, 1054, 891, 749. **HRMS** (EI) Calcd for C<sub>15</sub>H<sub>12</sub>N<sub>2</sub>O<sub>2</sub>S<sub>2</sub> 316.0340, Found 316.0339.

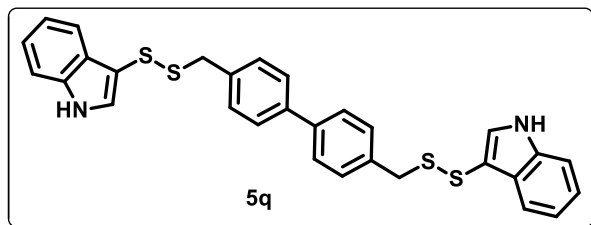

The reaction of indole (0.22 mmol, 2.2 equivalents, 25.8 mg),  $\text{B}(\text{C}_6\text{F}_5)_3$  (0.002 mmol, 2 mol%, 1 mg), 4-MeOCH<sub>2</sub>SSC<sub>6</sub>H<sub>4</sub>C<sub>6</sub>H<sub>4</sub>CH<sub>2</sub>SSOMe (0.1 mmol, 1 equivalent, 37.1 mg) in toluene (0.25 mL) at 0 °C for 24 hours afforded compound **5q** in 35% yield (20 mg) as a white solid according to the general procedure C<sub>2</sub>. **<sup>1</sup>H NMR** (400 MHz, DMSO-d<sub>6</sub>)  $\delta$  11.62 (s, 2H), 7.73-7.58 (m, 8H), 7.46-7.42 (m, 6H), 7.22-7.13 (m, 4H), 4.06 (s, 4H). **<sup>13</sup>C NMR** (100 MHz, DMSO-d<sub>6</sub>)  $\delta$  138.7, 136.7, 136.5, 132.2, 129.9, 128.3,

126.6, 122.2(0), 120.2(2), 118.5, 112.3, 104.6, 41.9. **IR** (film) 3443, 3372, 2986, 2901, 1495, 1453, 1431, 1243, 1052, 874, 814, 750, 624. **HRMS** (ESI) Calcd for  $C_{30}H_{24}N_2S_4$  ( $M+Na^+$ ) 563.0715, Found 563.0712.

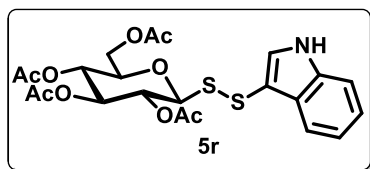

The reaction of indole (0.22 mmol, 1.1 equivalents, 25.8 mg),  $B(C_6F_5)_3$  (0.004 mmol, 2 mol%, 2.1 mg), RSSOMe (0.2 mmol, 1 equivalent, 85.3 mg) in toluene (0.25 mL) at r.t. for 24 hours afforded compound **5r** in 94% yield (96 mg) as a white solid according to the general procedure C<sub>2</sub>. **<sup>1</sup>H NMR** (400 MHz,  $CDCl_3$ )  $\delta$  8.78 (s, 1H), 7.92-7.66 (m, 1H), 7.44 (d,  $J = 1.4$  Hz, 1H), 7.34-7.33 (m, 1H), 7.26-7.14 (m, 2H), 5.30-5.18 (m, 2H), 5.17-5.09 (m, 1H), 4.77-4.61 (m, 1H), 4.22 (d of ABq,  $J = 12.4, 4.4$  Hz, 1H), 3.94 (d,  $J = 12.1$  Hz, 1H), 3.83-3.60 (m, 1H), 2.01 (s, 6H), 1.98 (s, 3H), 1.75 (s, 3H). **<sup>13</sup>C NMR** (100 MHz,  $CDCl_3$ )  $\delta$  170.6, 170.1, 169.4, 169.3, 136.0, 131.4, 128.5, 123.0, 120.8, 119.14, 111.7, 107.1, 88.8, 76.1, 73.8, 69.6, 68.0, 61.9, 20.6, 20.5, 20.5, 20.2. **IR** (film) 3392, 2988, 2948, 1744, 1371, 1215, 1036, 910, 744, 644. **HRMS** (EI) Calcd for  $C_{22}H_{25}NO_9S_2$  511.0971, Found 511.0977.

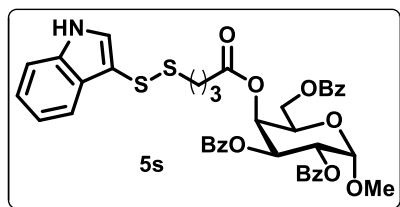

The reaction of indole (0.22 mmol, 1.1 equivalents, 25.8 mg),  $B(C_6F_5)_3$  (0.004 mmol, 2 mol%, 2.1 mg), RSSOMe (0.2 mmol, 1 equivalent, 134.2 mg) in toluene (0.25 mL) at 0 °C for 24 hours afforded compound **5s** in 67% yield (104.2 mg) as a white solid according to the general procedure C<sub>2</sub>. **<sup>1</sup>H NMR** (400 MHz,  $CDCl_3$ )  $\delta$  8.67 (s, 1H), 7.95 - 7.86 (m, 4H), 7.74 - 7.66 (m, 3H), 7.46-7.38 (m, 2H), 7.33 - 7.20 (m, 7H), 7.15 - 7.07 (m, 4H), 5.74 (d of ABq,  $J = 10.7, 3.4$  Hz, 1H), 5.66 (d,  $J = 3.1$  Hz, 1H), 5.47 (d of ABq,  $J = 10.7, 3.6$  Hz, 1H), 5.11 (d,  $J = 3.5$  Hz, 1H), 4.40-4.35 (m, 2H), 4.23-4.17 (m, 1H), 3.34 (s, 3H), 2.63-2.50 (m, 2H), 2.35 (t,  $J = 7.4$  Hz, 2H), 1.99-1.85 (m, 2H). **<sup>13</sup>C NMR** (100 MHz,  $CDCl_3$ )  $\delta$  172.2, 166.2, 166.1(5), 165.5, 136.4, 133.4, 133.3, 133.2(9), 130.2, 129.8, 129.7, 129.4(4), 129.4(0), 129.1, 129.0, 128.6, 128.5, 128.4(3), 128.4, 123.0, 120.9, 119.4, 111.7, 107.6, 97.5, 69.0, 68.5, 68.3, 66.6, 62.5, 55.7, 37.6, 32.4, 23.6. **IR** (film) 3408, 2980, 2904, 1720, 1450, 1404, 1258, 1069, 899, 744, 707. **HRMS** (ESI) Calcd for  $C_{40}H_{37}NO_{10}S_2$  ( $M+Na^+$ ) 778.1751, Found 778.1754.

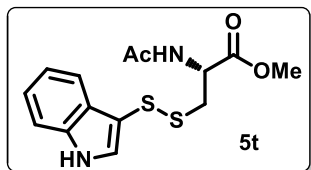

The reaction of indole (0.22 mmol, 1.1 equivalents, 25.8 mg),  $B(C_6F_5)_3$  (0.004 mmol, 2 mol%, 2.1 mg), RSSOMe (0.2 mmol, 1 equivalent, 47.9 mg) in toluene (0.25 mL) at r.t. for 24 hours afforded compound **5t** in 95% yield (61.5 mg) as a white solid according to the general procedure C<sub>2</sub>. **<sup>1</sup>H NMR** (400 MHz, CDCl<sub>3</sub>)  $\delta$  9.11 (brs, 1H), 7.82-7.80 (m, 1H), 7.43 (m, 2H), 7.28 - 7.17 (m, 1H), 6.45 (s, 1H), 4.94 (dt,  $J = 7.3, 5.3$  Hz, 1H), 3.73 (s, 3H), 3.32 - 3.15 (m, 2H), 1.89 (s, 3H). **<sup>13</sup>C NMR** (100 MHz, CDCl<sub>3</sub>)  $\delta$  171.1, 170.3, 136.6, 130.9, 128.2, 123.2, 121.1, 119.3, 111.9, 106.4, 52.7, 51.7, 39.7, 22.9. **IR** (film) 3379, 3266, 2982, 2906, 1738, 1657, 1519, 1408, 1372, 1217, 1037, 907, 831, 737. **HRMS** (EI) Calcd for C<sub>14</sub>H<sub>16</sub>N<sub>2</sub>O<sub>3</sub>S<sub>2</sub> 324.0602, Found 324.0606.

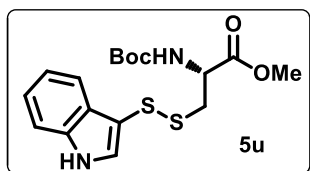

The reaction of indole (0.22 mmol, 1.1 equivalents, 25.8 mg),  $B(C_6F_5)_3$  (0.004 mmol, 2 mol%, 2.1 mg), RSSOMe (0.2 mmol, 1 equivalent, 59.5 mg) in toluene (0.25 mL) at 0 °C for 24 hours afforded compound **5u** in 89% yield (68 mg) as a white solid according to the general procedure C<sub>2</sub>. **<sup>1</sup>H NMR** (400 MHz, CDCl<sub>3</sub>)  $\delta$  8.44 (brs, 1H), 7.71-7.69 (m, 1H), 7.33 (d,  $J = 1.9$  Hz, 1H), 7.27-7.25 (m, 1H), 7.15 - 7.08 (m, 2H), 5.25 (d,  $J = 6.9$  Hz, 1H), 4.58 (d,  $J = 6.5$  Hz, 1H), 3.60 (s, 3H), 3.09-2.89 (m, 2H), 1.31 (s, 9H). **<sup>13</sup>C NMR** (100 MHz, CDCl<sub>3</sub>)  $\delta$  171.5, 155.2, 136.5, 130.6, 128.4, 123.3, 121.2, 119.5, 111.7, 107.0, 80.2, 52.9, 52.6, 40.2, 28.3. **IR** (film) 3380, 2974, 2900, 1736, 1650, 1407, 1253, 1067, 892, 750. **HRMS** (EI) Calcd for C<sub>17</sub>H<sub>22</sub>N<sub>2</sub>O<sub>4</sub>S<sub>2</sub> 382.1021, Found 382.1017.

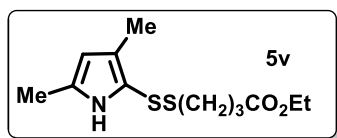

The reaction of 2,4-dimethylpyrrole (0.3 mmol, 1.5 equivalents, 28.6 mg), MeSO<sub>3</sub>H (0.02 mmol, 10 mol%, 2 mg), EtO<sub>2</sub>C(CH<sub>2</sub>)<sub>3</sub>SSOMe (0.2 mmol, 1 equivalent, 42.1 mg) in *t*-AmylOH (0.5 mL) at 0 °C for 5 hours afforded compound **5v** in 62% yield (33.7 mg) as a colorless oil according to the general procedure C<sub>1</sub>. **<sup>1</sup>H NMR** (400 MHz, CDCl<sub>3</sub>)  $\delta$  8.45 (s, 1H), 5.78 (s, 1H), 4.16 (q,  $J = 7.1$  Hz, 2H), 2.76 (t,  $J = 7.2$  Hz, 2H), 2.45 (t,  $J = 6.7$  Hz, 2H), 2.33 - 1.91 (m, 8H), 1.27 (t,  $J = 7.0$  Hz, 3H). **<sup>13</sup>C NMR** (100 MHz, CDCl<sub>3</sub>)  $\delta$  173.6, 131.7, 128.0, 115.3, 109.6, 60.6, 36.7, 32.5, 23.8,

14.2, 13.2, 11.8. **IR** (film) 3340, 2921, 1729, 1560, 1444, 1374, 1293, 1204, 1135, 1034, 858, 792. **HRMS** (EI) Calcd for C<sub>12</sub>H<sub>19</sub>NO<sub>2</sub>S<sub>2</sub> 273.0857, Found 273.0863.

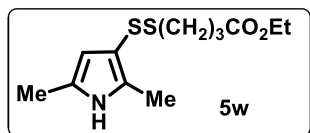

The reaction of 2,5-dimethylpyrrole (0.3 mmol, 1.5 equivalents, 28.6 mg), MeSO<sub>3</sub>H (0.02 mmol, 10 mol%, 2 mg), EtO<sub>2</sub>C(CH<sub>2</sub>)<sub>3</sub>SSOMe (0.2 mmol, 1 equivalent, 42.1 mg) in *t*-AmylOH (0.5 mL) at 0 °C for 5 hours afforded compound **5w** in 80% yield (43.7 mg) as a colorless oil according to the general procedure C<sub>1</sub>. **<sup>1</sup>H NMR** (400 MHz, CDCl<sub>3</sub>) δ 7.78 (s, 1H), 5.92 - 5.83 (m, 1H), 4.13 (q, *J* = 7.1 Hz, 2H), 2.77 (t, *J* = 7.0 Hz, 2H), 2.42 (t, *J* = 7.3 Hz, 2H), 2.32 (s, 3H), 2.19 (s, 3H), 2.09 (p, *J* = 7.2 Hz, 2H), 1.26 (t, *J* = 7.1 Hz, 3H). **<sup>13</sup>C NMR** (100 MHz, CDCl<sub>3</sub>) δ 173.2, 131.7, 126.3, 111.0, 110.9, 60.3, 37.4, 32.9, 23.9, 14.2, 12.9, 11.4. **IR** (film) 3358, 2922, 1713, 1587, 1444, 1373, 1309, 1206, 1181, 1131, 1034, 859, 785, 647. **HRMS** (EI) Calcd for C<sub>15</sub>H<sub>23</sub>NO<sub>4</sub>S<sub>2</sub> 273.0857, Found 273.0856.

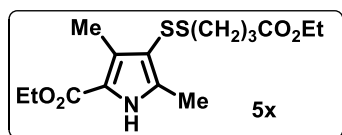

The reaction of ethyl 3,5-dimethyl-1H-pyrrole-2-carboxylate (0.3 mmol, 1.5 equivalents, 50.2 mg), MeSO<sub>3</sub>H (0.02 mmol, 10 mol%, 2 mg), EtO<sub>2</sub>C(CH<sub>2</sub>)<sub>3</sub>SSOMe (0.2 mmol, 1 equivalent, 42.1 mg) in *t*-AmylOH (0.5 mL) at 0 °C for 24 hours afforded compound **5x** in 41% yield (28.3 mg) as a white solid according to the general procedure C<sub>1</sub>. **<sup>1</sup>H NMR** (400 MHz, CDCl<sub>3</sub>) δ 9.41 (s, 1H), 4.32 (q, *J* = 6.9 Hz, 2H), 4.12 (q, *J* = 7.0 Hz, 2H), 2.72 (t, *J* = 6.9 Hz, 2H), 2.51 - 2.29 (m, 8H), 2.19 - 1.94 (m, 2H), 1.36 (t, *J* = 7.0 Hz, 3H), 1.24 (t, *J* = 7.0 Hz, 3H). **<sup>13</sup>C NMR** (100 MHz, CDCl<sub>3</sub>) δ 173.0, 161.7, 137.9, 131.4, 117.9, 114.8, 60.4, 60.2, 37.1, 32.7, 24.0, 14.5, 14.2, 12.1, 11.5. **IR** (film) 3270, 2981, 1728, 1665, 1434, 1376, 1276, 1206, 1129, 1078, 1019, 877, 775, 624. **HRMS** (EI) Calcd for C<sub>15</sub>H<sub>23</sub>NO<sub>4</sub>S<sub>2</sub> 345.1069, Found 345.1073.

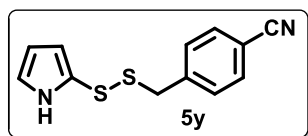

The reaction of pyrrole (0.22 mmol, 1.1 equivalents, 14.8 mg), B(C<sub>6</sub>F<sub>5</sub>)<sub>3</sub> (0.004 mmol, 2 mol%, 2.1 mg), 4-NCC<sub>6</sub>H<sub>4</sub>SSOMe (0.2 mmol, 1 equivalent, 42.3 mg) in toluene (0.25 mL) at 0 °C for 24 hours afforded compound **5y** in 67% yield (33.0 mg) as a white solid according to the general procedure C<sub>2</sub>. **<sup>1</sup>H NMR** (400 MHz, CDCl<sub>3</sub>) δ

8.21 (brs, 1H), 7.61 (d,  $J = 8.2$  Hz, 2H), 7.41 (d,  $J = 8.2$  Hz, 2H), 6.85 (dd,  $J = 4.0, 2.7$  Hz, 1H), 6.35 (t,  $J = 3.5$  Hz, 1H), 6.17 (dd,  $J = 5.9, 2.9$  Hz, 1H), 3.98 (s, 2H).  $^{13}\text{C}$  NMR (100 MHz,  $\text{CDCl}_3$ )  $\delta$  142.9, 132.2, 130.1, 122.6, 119.3, 118.7, 117.8, 111.1, 110.2, 42.2. IR (film) 3448, 2979, 2908, 2231, 1404, 1252, 1049, 873, 730, 695. HRMS (EI) Calcd for  $\text{C}_{12}\text{H}_{10}\text{N}_2\text{S}_2$  246.0285, Found 246.0283.

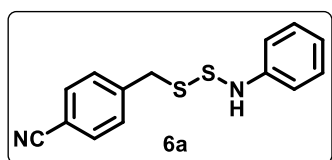

The reaction of aniline (0.22 mmol, 1.1 equivalents, 20.5 mg),  $\text{B}(\text{C}_6\text{F}_5)_3$  (0.005 mmol, 2.5 mol%, 2.6 mg), 4-NCC $_6\text{H}_4\text{CH}_2\text{SSOMe}$  (0.2 mmol, 1 equivalent, 42.3 mg) in toluene (0.5 mL) at r.t. for 24 hours afforded compound **6a** in 86% yield (46.9 mg) as a white solid according to the general procedure D.  $^1\text{H}$  NMR (400 MHz,  $\text{CDCl}_3$ )  $\delta$  7.60 (d,  $J = 8.1$  Hz, 2H), 7.39 (d,  $J = 8.1$  Hz, 2H), 7.25 (t,  $J = 7.8$  Hz, 2H), 7.05 - 6.81 (m, 3H), 4.72 (s, 1H), 4.08 (s, 2H).  $^{13}\text{C}$  NMR (100 MHz,  $\text{CDCl}_3$ )  $\delta$  145.0, 143.7, 132.3, 129.8, 129.2, 121.9, 118.6, 116.9, 111.1, 42.9. IR (film) 3314, 2975, 2227, 1595, 1491, 1397, 1285, 1225, 1073, 890, 841, 744, 686. HRMS (EI) Calcd for  $\text{C}_{14}\text{H}_{12}\text{N}_2\text{S}_2$  272.0442, Found 272.0447.

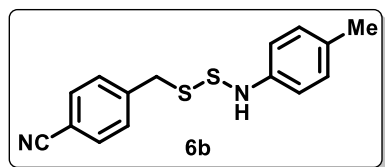

The reaction of 4-Methylaniline (0.22 mmol, 1.1 equivalents, 23.6 mg),  $\text{B}(\text{C}_6\text{F}_5)_3$  (0.005 mmol, 2.5 mol%, 2.6 mg), 4-NCC $_6\text{H}_4\text{CH}_2\text{SSOMe}$  (0.2 mmol, 1 equivalent, 42.3 mg) in toluene (0.5 mL) at r.t. for 24 hours afforded compound **6b** in 93% yield (53.3 mg) as a white solid according to the general procedure D.  $^1\text{H}$  NMR (400 MHz,  $\text{DMSO-d}_6$ )  $\delta$  7.90 (s, 1H), 7.79 (d,  $J = 8.1$  Hz, 2H), 7.53 (d,  $J = 8.1$  Hz, 3H), 7.05 (d,  $J = 8.2$  Hz, 2H), 6.96 (d,  $J = 8.3$  Hz, 2H), 4.17 (s, 2H), 2.36 (s, 3H).  $^{13}\text{C}$  NMR (100 MHz,  $\text{DMSO-d}_6$ )  $\delta$  144.1, 143.3, 132.3, 130.0, 129.5, 118.8, 116.5, 109.8, 40.6, 20.2. IR (film) 3311, 2922, 2228, 1603, 1504, 1458, 1283, 1224, 896, 841, 809, 740, 646. HRMS (EI) Calcd for  $\text{C}_{15}\text{H}_{14}\text{N}_2\text{S}_2$  286.0596, Found 286.0593.

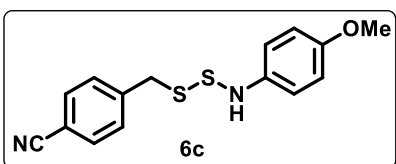

The reaction of 4-Methoxyaniline (0.22 mmol, 1.1 equivalents, 27.1 mg),  $\text{B}(\text{C}_6\text{F}_5)_3$  (0.005 mmol, 2.5

mol%, 2.6 mg), 4-NCC<sub>6</sub>H<sub>4</sub>CH<sub>2</sub>SSOMe (0.2 mmol, 1 equivalent, 42.3 mg) in toluene (0.5 mL) at r.t. for 24 hours afforded compound **6c** in 82% yield (49.9 mg) as a white solid according to the general procedure D. **<sup>1</sup>H NMR** (400 MHz, DMSO-d<sub>6</sub>) δ 7.79 (d, *J* = 8.2 Hz, 2H), 7.75 (s, 1H), 7.53 (d, *J* = 8.2 Hz, 2H), 7.00 (d, *J* = 8.9 Hz, 2H), 6.85 (d, *J* = 8.9 Hz, 2H), 4.15 (s, 2H), 3.70 (s, 3H). **<sup>13</sup>C NMR** (100 MHz, DMSO-d<sub>6</sub>) δ 154.0, 144.2, 139.1, 132.3, 130.0, 118.8, 117.9, 114.5, 109.7, 55.2, 40.6. **IR** (film) 3314, 2949, 2834, 2228, 1605, 1504, 1463, 1280, 1222, 1029, 900, 824, 753, 655. **HRMS** (EI) Calcd for C<sub>15</sub>H<sub>14</sub>ON<sub>2</sub>S<sub>2</sub> 302.0548, Found 302.0554.

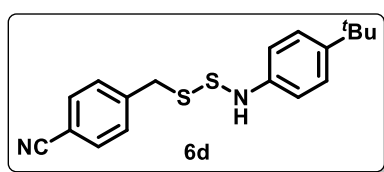

The reaction of 4-*tert*-butylaniline (0.22 mmol, 1.1 equivalents, 32.9 mg), B(C<sub>6</sub>F<sub>5</sub>)<sub>3</sub> (0.005 mmol, 2.5 mol%, 2.6 mg), 4-NCC<sub>6</sub>H<sub>4</sub>CH<sub>2</sub>SSOMe (0.2 mmol, 1 equivalent, 42.3 mg) in toluene (0.5 mL) at r.t. for 24 hours afforded compound **6d** in 92% yield (60.9 mg) as a white solid according to the general procedure D. **<sup>1</sup>H NMR** (400 MHz, DMSO-d<sub>6</sub>) δ 7.94 (s, 1H), 7.78 (d, *J* = 8.2 Hz, 2H), 7.54 (d, *J* = 8.3 Hz, 2H), 7.26 (d, *J* = 8.7 Hz, 2H), 7.00 (d, *J* = 8.6 Hz, 2H), 4.17 (s, 2H), 1.23 (s, 9H). **<sup>13</sup>C NMR** (100 MHz, DMSO-d<sub>6</sub>) δ 144.1, 143.2, 143.0, 132.2, 130.0, 125.7, 118.8, 116.1, 109.8, 40.6, 33.7, 31.3. **IR** (film) 3332, 2956, 2852, 2227, 1607, 1510, 1464, 1362, 1282, 1233, 1285, 998, 826, 733, 653. **HRMS** (EI) Calcd for C<sub>18</sub>H<sub>20</sub>N<sub>2</sub>S<sub>2</sub> 328.1070, Found 328.1068.

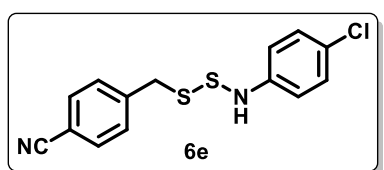

The reaction of 4-chloroaniline (0.22 mmol, 1.1 equivalents, 28.1 mg), B(C<sub>6</sub>F<sub>5</sub>)<sub>3</sub> (0.005 mmol, 2.5 mol%, 2.6 mg), 4-NCC<sub>6</sub>H<sub>4</sub>CH<sub>2</sub>SSOMe (0.2 mmol, 1 equivalent, 42.3 mg) in toluene (0.5 mL) at r.t. for 24 hours afforded compound **6e** in 87% yield (54 mg) as a white solid according to the general procedure D. **<sup>1</sup>H NMR** (400 MHz, DMSO-d<sub>6</sub>) δ 8.20 (s, 1H), 7.76 (s, 2H), 7.53 (s, 2H), 7.25 (s, 2H), 7.05 (s, 2H), 4.18 (s, 2H). **<sup>13</sup>C NMR** (100 MHz, DMSO-d<sub>6</sub>) δ 144.9, 143.9, 132.3, 130.1, 128.9, 124.3, 118.8, 117.8, 109.9, 40.7. **IR** (film) 3305, 2962, 2852, 2230, 1597, 1486, 1262, 1225, 1093, 894, 814, 737. **HRMS** (EI) Calcd for C<sub>14</sub>H<sub>11</sub>ClN<sub>2</sub>S<sub>2</sub> 306.0051, Found 306.0052.

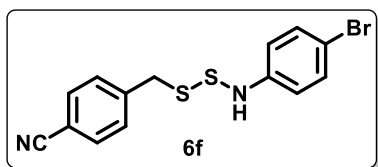

The reaction of 4-bromoaniline (0.22 mmol, 1.1 equivalents, 37.9 mg),  $B(C_6F_5)_3$  (0.005 mmol, 2.5 mol%, 2.6 mg), 4-NCC<sub>6</sub>H<sub>4</sub>CH<sub>2</sub>SSOMe (0.2 mmol, 1 equivalent, 42.3 mg) in toluene (0.5 mL) at r.t. for 24 hours afforded compound **6f** in 71% yield (50 mg) as a white solid according to the general procedure D. **<sup>1</sup>H NMR** (400 MHz, DMSO-d<sub>6</sub>)  $\delta$  8.20 (s, 1H), 7.79 (d,  $J$  = 8.1 Hz, 2H), 7.54 (d,  $J$  = 8.1 Hz, 2H), 7.40 (d,  $J$  = 8.7 Hz, 2H), 7.01 (d,  $J$  = 8.8 Hz, 2H), 4.20 (s, 2H). **<sup>13</sup>C NMR** (100 MHz, DMSO)  $\delta$  145.3, 143.9, 132.3, 131.8, 130.1, 118.8, 118.3, 112.0, 109.9, 40.7. **IR** (film) 3300, 2960, 2850, 2231, 1587, 1482, 1226, 1072, 894, 814. **HRMS** (EI) Calcd for C<sub>14</sub>H<sub>11</sub>BrN<sub>2</sub>S<sub>2</sub> 349.9547, Found 349.9556.

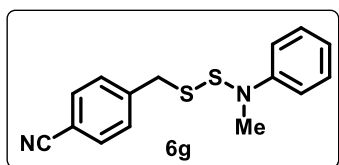

The reaction of *N*-methylaniline (0.22 mmol, 1.1 equivalents, 23.6 mg),  $B(C_6F_5)_3$  (0.005 mmol, 2.5 mol%, 2.6 mg), 4-NCC<sub>6</sub>H<sub>4</sub>CH<sub>2</sub>SSOMe (0.2 mmol, 1 equivalent, 42.3 mg) in toluene (0.5 mL) at r.t. for 24 hours afforded compound **6g** in 60% yield (35.3 mg) as a white solid according to the general procedure D. **<sup>1</sup>H NMR** (400 MHz, DMSO-d<sub>6</sub>)  $\delta$  7.76 (d,  $J$  = 8.3 Hz, 2H), 7.42 (d,  $J$  = 8.3 Hz, 2H), 7.36 - 7.25 (m, 2H), 7.26 - 7.17 (m, 2H), 7.09 - 6.83 (m, 1H), 4.11 (s, 2H), 3.15 (s, 3H). **<sup>13</sup>C NMR** (100 MHz, DMSO-d<sub>6</sub>)  $\delta$  149.2, 144.0, 132.4, 129.9, 128.9, 121.7, 118.7, 118.4, 109.9, 43.9, 42.3. **IR** (film) 2990, 2956, 2227, 1933, 1595, 1489, 1413, 1253, 1082, 1062, 849, 747, 683. **HRMS** (EI) Calcd for C<sub>15</sub>H<sub>14</sub>N<sub>2</sub>S<sub>2</sub> 286.0596, Found 286.0598.

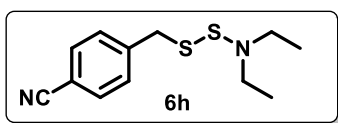

The reaction of diethylamine (0.22 mmol, 1.1 equivalents, 17.6 mg),  $B(C_6F_5)_3$  (0.005 mmol, 2.5 mol%, 2.6 mg), 4-NCC<sub>6</sub>H<sub>4</sub>CH<sub>2</sub>SSOMe (0.2 mmol, 1 equivalent, 42.3 mg) in toluene (0.5 mL) at r.t. for 24 hours afforded compound **6h** in 69% yield (34.7 mg) as a colorless oil according to the general procedure D. **<sup>1</sup>H NMR** (400 MHz, CDCl<sub>3</sub>)  $\delta$  7.61 (d,  $J$  = 8.3 Hz, 2H), 7.42 (d,  $J$  = 8.4 Hz, 2H), 4.09 (s, 2H), 2.82 (q,  $J$  = 7.1 Hz, 4H), 1.15 (t,  $J$  = 7.1 Hz, 6H). **<sup>13</sup>C NMR** (100 MHz, CDCl<sub>3</sub>)  $\delta$  144.3, 132.4, 129.5, 118.7, 111.0, 51.3, 44.4, 13.3. **IR** (film) 2977, 2935, 2847, 2229, 1606, 1504, 1465, 1379, 1178, 1060, 1024, 904, 844, 841, 614. **HRMS** (EI) Calcd for C<sub>12</sub>H<sub>16</sub>N<sub>2</sub>S<sub>2</sub> 252.0755, Found 252.0760.

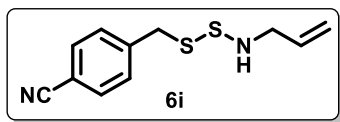

The reaction of allylamine (0.22 mmol, 1.1 equivalents, 12.6 mg),  $B(C_6F_5)_3$  (0.005 mmol, 2.5 mol%, 2.6 mg), 4-NCC<sub>6</sub>H<sub>4</sub>CH<sub>2</sub>SSOMe (0.2 mmol, 1 equivalent, 42.3 mg)

in toluene (0.5 mL) at r.t. for 24 hours afforded compound **6i** in 67% yield (32.1 mg) as a white solid according to the general procedure D. **<sup>1</sup>H NMR** (400 MHz, DMSO-d<sub>6</sub>)  $\delta$  7.82 (d,  $J$  = 7.8 Hz, 2H), 7.54 (d,  $J$  = 7.7 Hz, 2H), 5.87-5.75 (m, 1H), 5.20 (d,  $J$  = 17.2 Hz, 1H), 5.13-5.11 (m, 2H), 4.15 (s, 2H), 3.43 (s, 2H). **<sup>13</sup>C NMR** (100 MHz, DMSO-d<sub>6</sub>)  $\delta$  144.5, 135.6, 132.3, 130.1, 118.8, 116.7, 109.7, 52.4, 40.6. **IR** (film) 3292, 2928, 2228, 1919, 1604, 1501, 1417, 1200, 1053, 991, 929, 839, 680. **HRMS** (EI) Calcd for C<sub>11</sub>H<sub>12</sub>N<sub>2</sub>S<sub>2</sub> 236.0442, Found 236.0446.

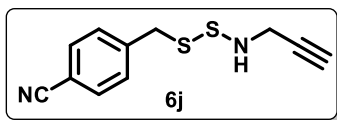

The reaction of 2-propynylamine (0.22 mmol, 1.1 equivalents, 12.2 mg),  $B(C_6F_5)_3$  (0.005 mmol, 2.5 mol%, 2.6 mg), 4-NCC<sub>6</sub>H<sub>4</sub>CH<sub>2</sub>SSOMe (0.2 mmol, 1 equivalent, 42.3 mg)

in toluene (0.5 mL) at r.t. for 24 hours afforded compound **6j** in 56% yield (26.4 mg) as a white solid according to the general procedure D. **<sup>1</sup>H NMR** (400 MHz, DMSO-d<sub>6</sub>)  $\delta$  7.80 (d,  $J$  = 8.3 Hz, 2H), 7.55 (d,  $J$  = 8.3 Hz, 2H), 5.34 (t,  $J$  = 4.6 Hz, 1H), 4.17 (s, 2H), 3.60 (dd,  $J$  = 4.6, 2.5 Hz, 2H), 3.23 (t,  $J$  = 2.5 Hz, 1H). **<sup>13</sup>C NMR** (100 MHz, DMSO-d<sub>6</sub>)  $\delta$  144.3, 132.3, 130.2, 118.9, 109.7, 81.2, 74.9, 40.7, 38.6. **IR** (film) 3293, 2925, 2361, 2225, 1603, 1503, 1418, 1320, 1048, 838, 658. **HRMS** (EI) Calcd for C<sub>11</sub>H<sub>10</sub>N<sub>2</sub>S<sub>2</sub> 234.0285, Found 234.0282.

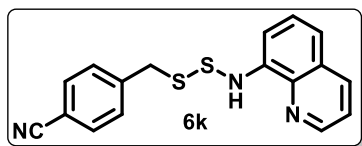

The reaction of 8-aminoquinoline (0.22 mmol, 1.1 equivalents, 32.9 mg),  $B(C_6F_5)_3$  (0.005 mmol, 2.5 mol%, 2.6 mg), 4-NCC<sub>6</sub>H<sub>4</sub>CH<sub>2</sub>SSOMe (0.2 mmol, 1

equivalent, 42.3 mg) in toluene (0.5 mL) at r.t. for 24 hours afforded compound **6k** in 70% yield (38.9 mg) as a white solid according to the general procedure D. **<sup>1</sup>H NMR** (400 MHz, DMSO-d<sub>6</sub>)  $\delta$  9.35 (dd,  $J$  = 4.2, 1.7 Hz, 1H), 8.90 (s, 1H), 8.85 (dd,  $J$  = 8.3, 1.6 Hz, 1H), 8.29 (d,  $J$  = 8.3 Hz, 2H), 8.16 (d,  $J$  = 8.3 Hz, 2H), 8.10 (dd,  $J$  = 8.3, 4.2 Hz, 1H), 8.08-8.04 (m, 1H), 7.99 (dd,  $J$  = 7.6, 1.3 Hz, 1H), 7.95 (dd,  $J$  = 8.0, 1.3 Hz, 1H), 4.79 (s, 2H). **<sup>13</sup>C NMR** (100 MHz, DMSO-d<sub>6</sub>)  $\delta$  148.2, 144.8, 141.7, 139.1, 136.3, 132.3, 130.2, 128.3, 127.1, 122.1, 119.0, 118.8, 111.3, 109.8, 40.5. **IR** (film)

3318, 3045, 2221, 1610, 1464, 1407, 1372, 1308, 1083, 908, 840, 820, 745, 628.

**HRMS** (EI) Calcd for C<sub>17</sub>H<sub>13</sub>N<sub>3</sub>S<sub>2</sub> 323.0551, Found 323.0560.

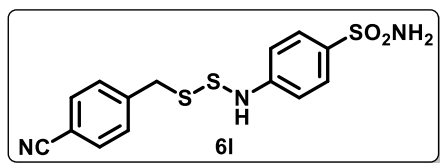

The reaction of sulfanilamide (0.22 mmol, 1.1 equivalents, 41.1 mg), B(C<sub>6</sub>F<sub>5</sub>)<sub>3</sub> (0.005 mmol, 2.5 mol%, 2.6 mg), 4-NCC<sub>6</sub>H<sub>4</sub>CH<sub>2</sub>SSOMe (0.2 mmol, 1 equivalent, 42.3 mg) in CH<sub>3</sub>CN (0.5 mL)

at r.t. for 24 hours afforded compound **6l** in 80% yield (56 mg) as a white solid according to the general procedure D. **<sup>1</sup>H NMR** (400 MHz, DMSO-d<sub>6</sub>) δ 8.55 (s, 1H), 7.82 (d, *J* = 8.1 Hz, 2H), 7.71 (d, *J* = 8.7 Hz, 2H), 7.57 (d, *J* = 8.2 Hz, 2H), 7.32 - 7.03 (m, 4H), 4.23 (s, 2H). **<sup>13</sup>C NMR** (100 MHz, DMSO-d<sub>6</sub>) δ 149.1, 143.8, 135.8, 132.4, 130.1, 127.3, 118.8, 115.7, 109.9, 40.8. **IR** (film) 3292, 2918, 2232, 1593, 1496, 1334, 1246, 1152, 1093, 890, 824, 771, 649. **HRMS** (EI) Calcd for C<sub>14</sub>H<sub>13</sub>N<sub>3</sub>O<sub>2</sub>S<sub>3</sub> 351.0170, Found 351.0168.

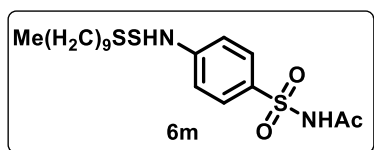

The reaction of acetosulfamine (0.2 mmol, 1 equivalent, 42.9 mg), B(C<sub>6</sub>F<sub>5</sub>)<sub>3</sub> (0.005 mmol, 2.5 mol%, 2.6 mg), Me(CH<sub>2</sub>)<sub>9</sub>SSOMe (0.3 mmol, 1.5 equivalents, 70.9 mg) in DMF (0.5 mL) at r.t. for 24

hours afforded compound **6m** in 80% yield (67 mg) as a white solid according to the general procedure D. **<sup>1</sup>H NMR** (400 MHz, DMSO-d<sub>6</sub>) δ 11.84 (brs, 1H), 8.64 (s, 1H), 7.76 (d, *J* = 8.7 Hz, 2H), 7.17 (d, *J* = 8.7 Hz, 2H), 2.91 (t, *J* = 7.3 Hz, 2H), 1.89 (s, 3H), 1.72-1.58 (m, 2H), 1.33-1.19 (m, 14H), 0.85 (t, *J* = 6.5 Hz, 3H). **<sup>13</sup>C NMR** (100 MHz, DMSO-d<sub>6</sub>) δ 168.4, 151.2, 129.8, 129.3, 115.2, 38.1, 31.2, 29.1, 28.9, 28.6, 28.5, 27.8, 23.1, 22.0, 13.9. **IR** (film) 3329, 3240, 2966, 2921, 1698, 1590, 1490, 1449, 1254, 1152, 1080, 1048, 831, 681, 627. **HRMS** (ESI) Calcd for C<sub>18</sub>H<sub>30</sub>N<sub>2</sub>O<sub>3</sub>S<sub>3</sub> (M+Na<sup>+</sup>) 441.1311, Found 441.1303.

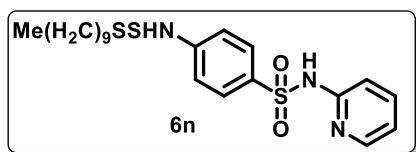

The reaction of sulfapyridine (0.2 mmol, 1 equivalent, 49.8 mg), B(C<sub>6</sub>F<sub>5</sub>)<sub>3</sub> (0.005 mmol, 2.5 mol%, 2.6 mg), Me(CH<sub>2</sub>)<sub>9</sub>SSOMe (0.3 mmol, 1.5

equivalents, 70.9 mg) in DMF (0.5 mL) at r.t. for 24 hours afforded compound **6n** in 86% yield (78 mg) as a white solid according to the general procedure D. **<sup>1</sup>H NMR**

(400 MHz, DMSO- $d_6$ )  $\delta$  11.48 (brs, 1H), 8.48 (s, 1H), 8.3 (m, 1H), 7.75 (d,  $J$  = 8.8 Hz, 2H), 7.67 (m, 1H), 7.14-7.05 (m, 3H), 6.87 (m, 1H), 2.87 (t,  $J$  = 7.3 Hz, 2H), 1.67-1.56 (m, 2H), 1.31- 1.19 (m, 14H), 0.85 (t,  $J$  = 6.8 Hz, 3H).  **$^{13}\text{C}$  NMR** (100 MHz, DMSO- $d_6$ )  $\delta$  152.1, 149.6, 144.3, 138.9, 131.7, 127.9, 115.8, 114.8, 112.4, 37.5, 30.7, 28.5, 28.3, 28.1, 28.0, 27.3, 21.5, 13.4. **IR** (film) 3315, 2978, 2905, 1591, 1453, 1386, 1251, 1073, 890, 767, 683. **HRMS** (ESI) Calcd for  $\text{C}_{21}\text{H}_{31}\text{N}_3\text{O}_2\text{S}_3$  ( $\text{M}+\text{H}^+$ ) 454.1651, Found 454.1642.

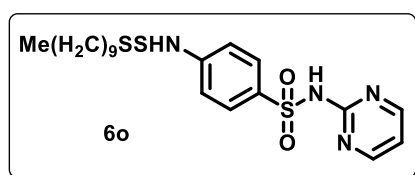

The reaction of sulfadiazine (0.2 mmol, 1 equivalent, 50.1 mg),  $\text{B}(\text{C}_6\text{F}_5)_3$  (0.005 mmol, 2.5 mol%, 2.6 mg),  $\text{Me}(\text{CH}_2)_9\text{SSOMe}$  (0.3 mmol, 1.5 equivalents, 70.9 mg) in DMF (0.5 mL) at r.t. for 24 hours afforded compound **6o** in 60% yield (54.5 mg) as a white solid according to the general procedure D.  **$^1\text{H}$  NMR** (400 MHz, DMSO- $d_6$ )  $\delta$  11.52 (brs, 1H), 8.65 - 8.38 (m, 3H), 7.84 (d,  $J$  = 8.7 Hz, 2H), 7.13 (d,  $J$  = 8.8 Hz, 2H), 7.03 (t,  $J$  = 4.8 Hz, 1H), 2.88 (t,  $J$  = 7.2 Hz, 2H), 1.72 - 1.56 (m, 2H), 1.3 - 1.15 (m, 14H), 0.85 (t,  $J$  = 6.7 Hz, 3H).  **$^{13}\text{C}$  NMR** (100 MHz, DMSO- $d_6$ )  $\delta$  158.3, 157.0, 150.6, 130.9, 129.4, 115.7, 115.1, 38.0, 31.3, 29.1, 28.9, 28.6, 28.5, 27.8, 22.1, 13.9. **IR** (film) 3303, 2979, 2904, 1583, 1406, 1356, 1249, 1153, 1052, 892, 801, 673. **HRMS** (ESI) Calcd for  $\text{C}_{20}\text{H}_{30}\text{N}_4\text{O}_2\text{S}_3$  ( $\text{M}+\text{Na}^+$ ) 477.1423, Found 477.1420.

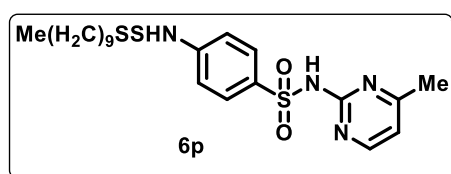

The reaction of sulfamerazine (0.2 mmol, 1 equivalent, 52.9 mg),  $\text{B}(\text{C}_6\text{F}_5)_3$  (0.005 mmol, 2.5 mol%, 2.6 mg),  $\text{Me}(\text{CH}_2)_9\text{SSOMe}$  (0.3 mmol, 1.5 equivalents, 70.9 mg) in DMF (0.5 mL) at r.t. for 24 hours afforded compound **6p** in 90% yield (84.4 mg) as a white solid according to the general procedure D.  **$^1\text{H}$  NMR** (400 MHz,  $\text{CDCl}_3$ )  $\delta$  8.54 (d,  $J$  = 5.2 Hz, 1H), 8.00 (d,  $J$  = 8.7 Hz, 2H), 7.09 (d,  $J$  = 8.8 Hz, 2H), 6.78 (d,  $J$  = 5.2 Hz, 1H), 5.64 (s, 1H), 2.87 (t,  $J$  = 7.3 Hz, 2H), 2.42 (s, 3H), 1.75-1.59 (m, 2H), 1.38-1.21 (m, 14H), 0.87 (t,  $J$  = 6.8 Hz, 3H).  **$^{13}\text{C}$  NMR** (100 MHz,  $\text{CDCl}_3$ )  $\delta$  169.5, 157.3, 156.5, 150.2, 131.2, 130.6, 115.1, 115.1, 39.4, 31.8, 29.7, 29.5, 29.4, 29.2, 29.1, 28.4, 24.0, 22.6, 14.1. **IR** (film) 3314, 2981, 2903, 1593, 1404, 1250, 1070, 892, 745. **HRMS** (ESI) Calcd for  $\text{C}_{21}\text{H}_{32}\text{N}_4\text{O}_2\text{S}_3$  ( $\text{M}+\text{Na}^+$ ) 491.1580, Found 491.1577.

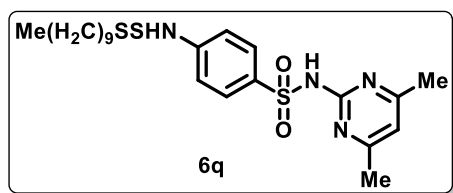

The reaction of sulfamethazine (0.2 mmol, 1 equivalent, 56.7 mg),  $B(C_6F_5)_3$  (0.005 mmol, 2.5 mol%, 2.6 mg),  $Me(CH_2)_9SSOMe$  (0.3 mmol, 1.5 equivalents, 70.9 mg) in DMF (0.5 mL) at r.t. for 24 hours afforded compound **6q** in 81% yield (78.1 mg) as a white solid according to the general procedure D.  **$^1H$  NMR** (400 MHz,  $DMSO-d_6$ )  $\delta$  11.38 (brs, 1H), 8.49 (s, 1H), 7.86 (d,  $J = 8.8$  Hz, 2H), 7.12 (d,  $J = 8.8$  Hz, 2H), 6.74 (s, 1H), 2.88 (t,  $J = 7.3$  Hz, 2H), 2.24 (s, 6H), 1.66-1.59 (m, 2H), 1.30-1.16 (m, 14H), 0.85 (t,  $J = 6.8$  Hz, 3H).  **$^{13}C$  NMR** (100 MHz,  $DMSO-d_6$ )  $\delta$  167.3, 156.3, 150.3, 131.2, 129.8, 114.7, 113.7, 38.1, 31.2, 29.0, 28.8, 28.6, 28.4, 27.7, 22.9, 22.0, 13.9. **IR** (film) 3316, 2977, 2903, 1593, 1489, 1384, 1249, 1151, 1075, 872, 832, 676. **HRMS** (ESI) Calcd for  $C_{22}H_{34}N_4O_2S_3$  ( $M+H^+$ ) 483.1917, Found 483.1913.

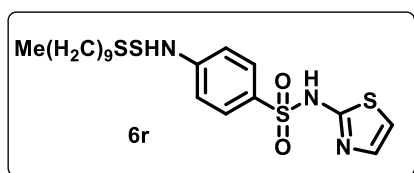

The reaction of sulfathiazole (0.2 mmol, 1 equivalent, 51.1 mg),  $B(C_6F_5)_3$  (0.005 mmol, 2.5 mol%, 2.6 mg),  $Me(CH_2)_9SSOMe$  (0.3 mmol, 1.5 equivalents, 70.9 mg) in DMF (0.5 mL) at r.t. for 24 hours afforded compound **6r** in 65% yield (59.8 mg) as a white solid according to the general procedure D.  **$^1H$  NMR** (400 MHz,  $DMSO-d_6$ )  $\delta$  12.57 (brs, 1H), 8.43 (s, 1H), 7.66 (d,  $J = 8.7$  Hz, 2H), 7.21 (d,  $J = 4.6$  Hz, 1H), 7.14 (d,  $J = 8.7$  Hz, 2H), 6.78 (d,  $J = 4.6$  Hz, 1H), 2.88 (t,  $J = 7.3$  Hz, 2H), 1.68-1.61 (m, 2H), 1.31-1.17 (m, 14H), 0.85 (t,  $J = 6.7$  Hz, 3H).  **$^{13}C$  NMR** (100 MHz,  $DMSO-d_6$ )  $\delta$  168.4, 149.7, 133.5, 127.4, 124.2, 115.3, 38.0, 31.2, 29.1, 28.9, 28.6, 28.5, 27.8, 22.0, 13.9. **IR** (film) 3319, 2953, 2923, 2853, 1573, 1536, 1490, 1289, 1138, 1186, 930, 856, 750, 683, 637. **HRMS** (ESI) Calcd for  $C_{19}H_{29}N_3O_2S_4$  ( $M+Na^+$ ) 482.1035, Found 482.1034.

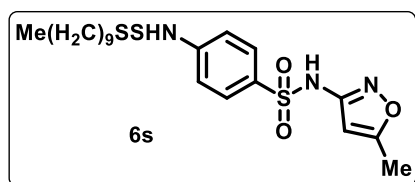

The reaction of sulfamethoxazole (0.2 mmol, 1 equivalent, 50.7 mg),  $B(C_6F_5)_3$  (0.005 mmol, 2.5 mol%, 2.6 mg),  $Me(CH_2)_9SSOMe$  (0.3 mmol, 1.5 equivalents, 70.9 mg) in DMF (0.5 mL) at r.t. for 24 hours afforded compound **6s** in 86% yield (78.7 mg) as a white solid according to the general procedure D.  **$^1H$  NMR** (400 MHz,  $DMSO-d_6$ )  $\delta$  11.17 (s, 1H), 8.60 (s, 1H), 7.70 (d,  $J = 8.8$  Hz, 2H), 7.15 (d,  $J = 8.8$  Hz, 2H), 6.11 (s, 1H), 2.89 (t,  $J = 7.3$

Hz, 2H), 2.29 (s, 3H), 1.73-1.58 (m, 2H), 1.32-1.15 (m, 14H), 0.85 (t,  $J = 6.7$  Hz, 3H).  **$^{13}\text{C}$  NMR** (100 MHz, DMSO- $d_6$ )  $\delta$  167.0, 157.6, 150.9, 130.1, 128.4, 115.5, 95.3, 38.0, 31.2, 29.0, 28.8, 28.6, 28.5, 27.8, 22.0, 13.9, 11.9(8), 11.9(5). **IR** (film) 3339, 3284, 2978, 2918, 1590, 1463, 1376, 1256, 1155, 1054, 887, 823, 682. **HRMS** (ESI) Calcd for  $\text{C}_{19}\text{H}_{29}\text{N}_3\text{O}_2\text{S}_4$  ( $\text{M}+\text{Na}^+$ ) 480.1420, Found 480.1416.

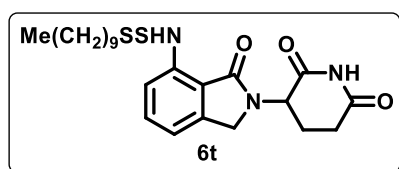

The reaction of lenalidomide (0.2 mmol, 1 equivalent, 51.9 mg),  $\text{B}(\text{C}_6\text{F}_5)_3$  (0.005 mmol, 2.5 mol%, 2.6 mg),  $\text{Me}(\text{CH}_2)_9\text{SSOMe}$  (0.3 mmol, 1.5 equivalents, 70.9 mg) in DMF (0.5 mL) at r.t. for 24 hours afforded compound **6t** in 62% yield (57.5 mg) as a white solid according to the general procedure D.  **$^1\text{H}$  NMR** (400 MHz,  $\text{CDCl}_3$ )  $\delta$  11.02 (s, 1H), 8.01 (s, 1H), 7.44-7.42 (m, 2H), 7.27 (d,  $J = 6.0$  Hz, 1H), 5.13 (dd,  $J = 12.7, 4.1$  Hz, 1H), 4.33 (q,  $J = 17.3$  Hz, 2H), 2.96-2.88 (m, 3H), 2.64-2.59 (m, 1H), 2.38-2.29 (m, 1H), 2.05-2.04 (m, 1H), 1.62-1.60 (m, 2H), 1.35-1.20 (m, 14H), 0.84 (t,  $J = 6.4$  Hz, 3H).  **$^{13}\text{C}$  NMR** (100 MHz,  $\text{CDCl}_3$ )  $\delta$  172.8, 171.0, 167.9, 141.5, 132.9, 129.8, 129.0, 118.6, 115.3, 51.6, 46.2, 37.8, 31.3, 31.2, 29.2, 28.9, 28.6, 28.5, 27.8, 22.7, 22.1, 13.9. **IR** (film) 3287, 2982, 2920, 1703, 1669, 1600, 1406, 1237, 1050, 865, 748, 658. **HRMS** (EI) Calcd for  $\text{C}_{23}\text{H}_{33}\text{N}_3\text{O}_3\text{S}_2$  463.1963, Found 463.1959.

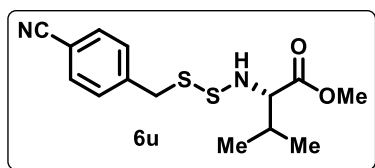

The reaction of L-valine (0.22 mmol, 1 equivalent, 25.8 mg),  $\text{B}(\text{C}_6\text{F}_5)_3$  (0.005 mmol, 2.5 mol%, 2.6 mg), 4-NCC $_6\text{H}_4\text{CH}_2\text{SSOMe}$  (0.2 mmol, 1 equivalent, 42.3 mg) in toluene (0.5 mL) at r.t. for 24 hours afforded compound **6u** in 45% yield (27.9 mg) as a colorless oil according to the general procedure D.  **$^1\text{H}$  NMR** (400 MHz,  $\text{CDCl}_3$ )  $\delta$  7.61 (d,  $J = 8.1$  Hz, 2H), 7.43 (d,  $J = 8.1$  Hz, 2H), 4.01 (s, 2H), 3.73 (s, 3H), 3.42 (d,  $J = 8.2$  Hz, 1H), 3.27 (dd,  $J = 8.2, 5.9$  Hz, 1H), 1.89 (dq,  $J = 13.3, 6.7$  Hz, 1H), 0.89 (d,  $J = 6.8$  Hz, 3H), 0.86 (d,  $J = 6.8$  Hz, 3H).  **$^{13}\text{C}$  NMR** (100 MHz,  $\text{CDCl}_3$ )  $\delta$  174.4, 143.2, 132.3, 129.9, 118.6, 111.1, 70.6, 52.1, 42.2, 31.9, 18.8, 18.1. **IR** (film) 3317, 2940, 2229, 1732, 1606, 1505, 1437, 1301, 1201, 1140, 994, 845, 743, 648. **HRMS** (EI) Calcd for  $\text{C}_{14}\text{H}_{18}\text{N}_2\text{O}_2\text{S}_2$  310.0810, Found 310.0815.

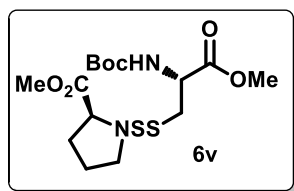

The reaction of methyl L-prolinate (0.22 mmol, 1.1 equivalents, 28.4 mg),  $B(C_6F_5)_3$  (0.005 mmol, 2.5 mol%, 2.6 mg), RSSOMe (0.2 mmol, 1 equivalent, 59.5 mg) in toluene (0.5 mL) at r.t. for 24 hours afforded compound **6v** in 82% yield (64.6 mg) as a white solid according to the general procedure D.  **$^1H$  NMR** (400 MHz,  $CDCl_3$ )  $\delta$  5.35 (d,  $J = 7.5$  Hz, 1H), 4.57 (s, 1H), 3.87-3.59 (m, 7H), 3.34 (s, 2H), 3.27 (d,  $J = 4.6$  Hz, 1H), 3.06 (q,  $J = 7.9$  Hz, 1H), 2.25-2.04 (m, 1H), 1.90-1.85 (m, 3H), 1.41 (s, 9H).  **$^{13}C$  NMR** (100 MHz,  $CDCl_3$ )  $\delta$  172.8, 170.9, 154.9, 80.1, 65.8, 55.7, 53.6, 52.5, 52.1, 43.1, 30.5, 28.2, 24.5. **IR** (film) 3380, 2980, 2905, 1743, 1714, 1403, 1252, 1164, 1074, 1048, 869, 754. **HRMS** (EI) Calcd for  $C_{15}H_{26}N_2O_6S_2$  394.1232, Found 394.1234.

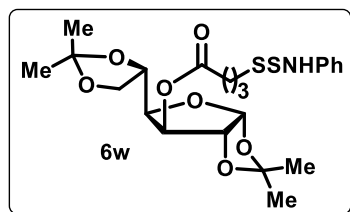

The reaction of aniline (0.22 mmol, 1.1 equivalents, 20.5 mg),  $B(C_6F_5)_3$  (0.005 mmol, 2.5 mol%, 2.6 mg), RSSOMe (0.2 mmol, 1 equivalent, 84.9 mg) in toluene (0.5 mL) at r.t. for 24 hours afforded compound **6w** in 77% yield (74.7 mg) as a colorless oil according to the general procedure D.  **$^1H$  NMR** (400 MHz,  $CDCl_3$ )  $\delta$  7.25 (t,  $J = 7.9$  Hz, 2H), 7.06 (d,  $J = 7.7$  Hz, 2H), 6.93 (t,  $J = 7.3$  Hz, 1H), 5.87 (d,  $J = 3.7$  Hz, 1H), 5.47 (s, 1H), 5.29 (s, 1H), 4.47 (d,  $J = 3.7$  Hz, 1H), 4.20 (t,  $J = 2.8$  Hz, 2H), 4.13-4.05 (m, 1H), 4.05-3.97 (m, 1H), 2.88 (t,  $J = 7.0$  Hz, 2H), 2.44 (t,  $J = 7.1$  Hz, 2H), 2.03 (p,  $J = 7.2$  Hz, 2H), 1.52 (s, 3H), 1.40 (s, 3H), 1.31 (s, 6H).  **$^{13}C$  NMR** (100 MHz,  $CDCl_3$ )  $\delta$  171.6, 145.4, 129.1, 121.5, 116.6, 112.2, 109.3, 105.0, 83.3, 79.8, 76.1, 72.4, 67.3, 37.9, 32.3, 26.8, 26.6, 26.1, 25.2, 24.7. **IR** (film) 3334, 2981, 2903, 1742, 1598, 1490, 1378, 1222, 1070, 889, 752, 693. **HRMS** (EI) Calcd for  $C_{22}H_{31}NO_7S_2$  485.1542, Found 485.1540.

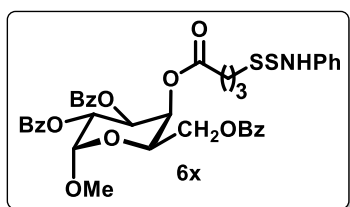

The reaction of aniline (0.22 mmol, 1.1 equivalents, 20.5 mg),  $B(C_6F_5)_3$  (0.005 mmol, 2.5 mol%, 2.6 mg), RSSOMe (0.2 mmol, 1 equivalent, 134.2 mg) in toluene (0.5 mL) at r.t. for 24 hours afforded compound **6x** in 92% yield (134.4 mg) as a white solid according to the general procedure D.  **$^1H$  NMR** (400 MHz,  $CDCl_3$ )  $\delta$  8.07 (d,  $J = 7.8$  Hz, 2H), 8.03 (d,  $J = 7.8$  Hz, 2H), 7.91 (d,  $J = 7.9$  Hz, 2H), 7.62-7.43 (m, 5H), 7.39 (t,  $J = 7.7$

Hz, 2H), 7.34 (t,  $J = 7.7$  Hz, 2H), 7.23 (t,  $J = 7.8$  Hz, 2H), 7.05 (d,  $J = 8.3$  Hz, 2H), 6.92 (t,  $J = 7.3$  Hz, 1H), 5.98-5.82 (m, 2H), 5.71-5.67 (m, 2H), 5.26 (d,  $J = 3.5$  Hz, 1H), 4.63-4.49 (m, 2H), 4.44-5.38 (m, 1H), 3.50 (s, 3H), 2.84 (t,  $J = 7.6$  Hz, 2H), 2.55 (t,  $J = 7.0$  Hz, 2H), 2.01 (p,  $J = 7.1$  Hz, 2H).  **$^{13}\text{C}$  NMR** (100 MHz,  $\text{CDCl}_3$ )  $\delta$  172.0, 166.0, 165.9(7), 165.4, 145.4, 133.3, 133.2, 129.8, 129.6, 129.4, 129.3, 129.1, 128.4, 128.3(5), 121.3, 116.7, 97.6, 68.8, 68.5, 68.4, 66.4, 62.1, 55.6, 37.8, 32.3, 25.0. **IR** (film) 3340, 2970, 2904, 1721, 1597, 1403, 1261, 1072, 891, 753, 709. **HRMS** (ESI) Calcd for  $\text{C}_{38}\text{H}_{37}\text{NO}_{10}\text{S}_2$  ( $\text{M}+\text{Na}^+$ ) 754.1751, Found 754.1732.

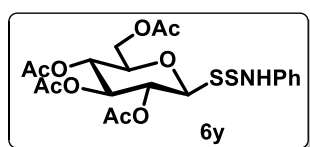

The reaction of aniline (0.22 mmol, 1.1 equivalents, 20.5 mg),  $\text{B}(\text{C}_6\text{F}_5)_3$  (0.005 mmol, 2.5 mol%, 2.6 mg),  $\text{RSSOMe}$  (0.2 mmol, 1 equivalent, 85.3 mg) in toluene (0.5 mL) at r.t. for 24 hours afforded compound **6y** in 95% yield (92.5 mg) as a white solid according to the general procedure D.  **$^1\text{H}$  NMR** (400 MHz,  $\text{CDCl}_3$ )  $\delta$  7.23 (t,  $J = 7.9$  Hz, 2H), 7.03 (d,  $J = 7.7$  Hz, 2H), 6.92 (t,  $J = 7.3$  Hz, 1H), 5.67 (s, 1H), 5.42 (t,  $J = 9.5$  Hz, 1H), 5.24 (t,  $J = 9.4$  Hz, 1H), 5.13 (t,  $J = 9.7$  Hz, 1H), 4.68 (d,  $J = 9.7$  Hz, 1H), 4.26-4.14 (m, 2H), 3.79-3.66 (m, 1H), 2.09 (s, 3H), 2.03 (s, 3H), 2.00 (s, 3H), 1.95 (s, 3H).  **$^{13}\text{C}$  NMR** (100 MHz,  $\text{CDCl}_3$ )  $\delta$  170.6, 170.0, 169.3, 169.2, 145.2, 129.0, 121.7, 116.8, 85.5, 76.2, 73.7, 69.5, 68.0, 61.7, 20.7, 20.6, 20.5, 20.4. **IR** (film) 3338, 2995, 1744, 1597, 1375, 1222, 1045, 912, 760, 690, 630. **HRMS** (EI) Calcd for  $\text{C}_{20}\text{H}_{25}\text{NO}_9\text{S}_2$  487.0971, Found 487.0978.

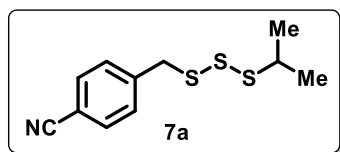

The reaction of 2-propanethiol (0.22 mmol, 1.1 equivalents, 20.5  $\mu\text{L}$ ),  $\text{B}(\text{C}_6\text{F}_5)_3$  (0.005 mmol, 2.5 mol%, 2.6 mg), 4-NCC $_6\text{H}_4\text{CH}_2\text{SSOMe}$  (0.2 mmol, 1 equivalent, 42.3 mg) in DCM (2 mL) at r.t. for 5 hours afforded compound **7a** in 80% yield (40.9 mg) as a colorless oil according to the general procedure E.  **$^1\text{H}$  NMR** (400 MHz,  $\text{CDCl}_3$ )  $\delta$  7.62 (d,  $J = 8.3$  Hz, 2H), 7.43 (d,  $J = 8.3$  Hz, 2H), 4.07 (s, 2H), 3.15 (tt,  $J = 6.8$  Hz,  $J = 6.8$  Hz, 1H), 1.33 (d,  $J = 6.8$  Hz, 6H).  **$^{13}\text{C}$  NMR** (100 MHz,  $\text{CDCl}_3$ )  $\delta$  142.3, 132.3, 130.1, 118.7, 111.2, 42.2, 41.8, 22.4. **IR** (film) 2962, 2922, 2862, 2228, 1919, 1606, 1503, 1446, 1235, 1153, 1047, 875, 842, 741, 652. **HRMS** (EI) Calcd for  $\text{C}_{11}\text{H}_{13}\text{NS}_3$  255.0210, Found 255.0213.

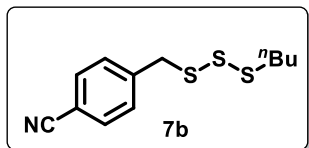

The reaction of butanethiol (0.22 mmol, 1.1 equivalents, 23.5  $\mu$ L),  $B(C_6F_5)_3$  (0.005 mmol, 2.5 mol%, 2.6 mg), 4-NCC<sub>6</sub>H<sub>4</sub>CH<sub>2</sub>SSOMe (0.2 mmol, 1 equivalent, 42.3 mg) in DCM (2 mL) at r.t. for 5 hours afforded compound **7b** in 88% yield (47.2 mg) as a colorless oil according to the general procedure E. <sup>1</sup>H NMR (400 MHz, CDCl<sub>3</sub>)  $\delta$  7.62 (d,  $J$  = 8.1 Hz, 2H), 7.43 (d,  $J$  = 8.1 Hz, 2H), 4.07 (s, 2H), 2.81 (t,  $J$  = 7.3 Hz, 2H), 1.84-1.55 (m, 2H), 1.57-1.30 (m, 2H), 0.92 (t,  $J$  = 7.4 Hz, 3H). <sup>13</sup>C NMR (100 MHz, CDCl<sub>3</sub>)  $\delta$  142.3, 132.3, 130.1, 118.7, 111.3, 42.1, 38.5, 30.7, 21.5, 13.6. IR (film) 2957, 2927, 2867, 2228, 1919, 1606, 1504, 1460, 1380, 1222, 1101, 1047, 875, 842, 740, 653. HRMS (EI) Calcd for C<sub>12</sub>H<sub>15</sub>NS<sub>3</sub> 269.0367, Found 269.0371.

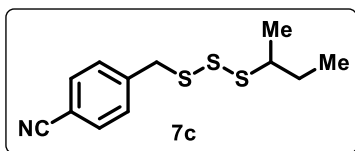

The reaction of butane-2-thiol (0.22 mmol, 1.1 equivalents, 24  $\mu$ L),  $B(C_6F_5)_3$  (0.005 mmol, 2.5 mol%, 2.6 mg), 4-NCC<sub>6</sub>H<sub>4</sub>CH<sub>2</sub>SSOMe (0.2 mmol, 1 equivalent, 42.3 mg) in DCM (2 mL) at r.t. for 5 hours afforded compound **7c** in 88% yield (47.5 mg) as a colorless oil according to the general procedure E. <sup>1</sup>H NMR (400 MHz, CDCl<sub>3</sub>)  $\delta$  7.62 (d,  $J$  = 8.3 Hz, 2H), 7.44 (d,  $J$  = 8.3 Hz, 2H), 4.07 (s, 2H), 2.94-2.89 (m, 1H), 1.82-1.66 (m, 1H), 1.63-1.50 (m, 1H), 1.33 (d,  $J$  = 6.8 Hz, 3H), 0.96 (t,  $J$  = 7.4 Hz, 3H). <sup>13</sup>C NMR (100 MHz, CDCl<sub>3</sub>)  $\delta$  142.4, 132.3, 130.2, 118.7, 111.3, 48.8, 42.2, 28.7, 20.0, 11.4. IR (film) 2963, 2924, 2871, 2229, 1606, 1499, 1454, 1415, 1288, 1180, 1080, 962, 842, 741, 651. HRMS (EI) Calcd for C<sub>12</sub>H<sub>15</sub>NS<sub>3</sub> 269.0365, Found 269.0365.

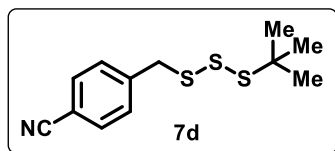

The reaction of 2-methyl-2-propanethiol (0.22 mmol, 1.1 equivalents, 19.9 mg),  $B(C_6H_5)_3$  (0.005 mmol, 2.5 mol%, 2.6 mg), 4-NCC<sub>6</sub>H<sub>4</sub>CH<sub>2</sub>SSOMe (0.2 mmol, 1 equivalent, 42.3 mg) in DCM (2 mL) at r.t. for 5 hours afforded compound **7d** in 94% yield (50.8 mg) as a white solid according to the general procedure E. <sup>1</sup>H NMR (400 MHz, CDCl<sub>3</sub>)  $\delta$  7.61 (d,  $J$  = 8.1 Hz, 2H), 7.42 (d,  $J$  = 8.2 Hz, 2H), 4.07 (s, 2H), 1.36 (s, 9H). <sup>13</sup>C NMR (100 MHz, CDCl<sub>3</sub>)  $\delta$  142.4, 132.2,

130.1, 118.7, 111.2, 49.1, 42.3, 29.8. **IR** (film) 2965, 2918, 2227, 1607, 1507, 1455, 1419, 1391, 1161, 871, 851, 651. **HRMS** (EI) Calcd for  $C_{12}H_{15}NS_3$  269.0367, Found 269.0368.

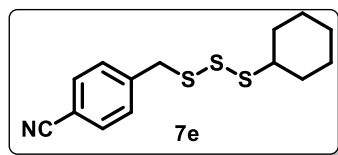

The reaction of cyclohexanethiol (0.22 mmol, 1.1 equivalents, 27  $\mu$ L),  $B(C_6F_5)_3$  (0.005 mmol, 2.5 mol%, 2.6 mg), 4-NCC<sub>6</sub>H<sub>4</sub>CH<sub>2</sub>SSOMe (0.2 mmol, 1 equivalent, 42.3 mg) in DCM (2 mL) at r.t. for 5 hours afforded compound **7e** in 87% yield (49.2 mg) as a colorless oil according to the general procedure E. **<sup>1</sup>H NMR** (400 MHz, CDCl<sub>3</sub>)  $\delta$  7.62 (d,  $J$  = 8.2 Hz, 2H), 7.43 (d,  $J$  = 8.2 Hz, 2H), 4.07 (s, 2H), 2.90 (tt,  $J$  = 10.6, 3.7 Hz, 1H), 2.13-1.90 (m, 2H), 1.89-1.67 (m, 2H), 1.63-1.60 (m, 1H), 1.49-0.98 (m, 5H). **<sup>13</sup>C NMR** (100 MHz, CDCl<sub>3</sub>)  $\delta$  142.4, 132.3, 130.2, 118.7, 111.3, 50.1, 42.2, 32.5, 25.9, 25.5. **IR** (film) 2924, 2852, 2229, 1605, 1497, 1447, 1262, 1183, 1080, 965, 827, 739, 648. **HRMS** (EI) Calcd for  $C_{14}H_{17}NS_3$  295.0523, Found 295.0525.

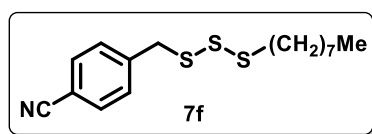

The reaction of 1-octanethiol (0.22 mmol, 1.1 equivalents, 38  $\mu$ L),  $B(C_6F_5)_3$  (0.005 mmol, 2.5 mol%, 2.6 mg), 4-NCC<sub>6</sub>H<sub>4</sub>CH<sub>2</sub>SSOMe (0.2 mmol, 1 equivalent, 42.3 mg) in DCM (2 mL) at r.t. for 5 hours afforded compound **7f** in 85% yield (55.2 mg) as a colorless oil according to the general procedure E. **<sup>1</sup>H NMR** (400 MHz, CDCl<sub>3</sub>)  $\delta$  7.62 (d,  $J$  = 8.2 Hz, 2H), 7.43 (d,  $J$  = 8.2 Hz, 2H), 4.07 (s, 2H), 2.90 (tt,  $J$  = 10.6, 3.7 Hz, 1H), 2.13-1.90 (m, 2H), 1.89-1.67 (m, 2H), 1.63-1.60 (m, 1H), 1.49 - 0.98 (m, 5H). **<sup>13</sup>C NMR** (100 MHz, CDCl<sub>3</sub>)  $\delta$  142.3, 132.3, 130.1, 118.7, 111.3, 42.1, 38.8, 31.7, 29.1, 29.0, 28.7, 28.4, 22.6, 14.1. **IR** (film) 3063, 2925, 2853, 2229, 1726, 1606, 1503, 1461, 1289, 1196, 1020, 965, 842, 740, 652. **HRMS** (EI) Calcd for  $C_{16}H_{23}NS_3$  325.0993, Found 325.0989.

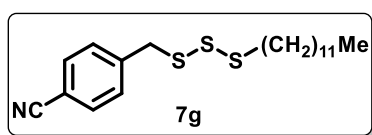

The reaction of 1-dodecanethiol (0.22 mmol, 1.1 equivalents, 48  $\mu$ L), 4-NCC<sub>6</sub>H<sub>4</sub>CH<sub>2</sub>SSOMe (0.2 mmol, 1 equivalent, 42.3 mg) in DCM (2 mL) at r.t. for 8 hours afforded compound **7g** in 89% yield (68 mg) as a colorless oil according to the general procedure E. **<sup>1</sup>H NMR** (400 MHz, CDCl<sub>3</sub>)  $\delta$  7.62 (d,  $J$  = 8.3 Hz, 2H),

7.43 (d,  $J = 8.3$  Hz, 2H), 4.07 (s, 2H), 2.85-2.71 (m, 2H), 1.80-1.63 (m, 2H), 1.40-1.25 (m, 18H), 0.88 (t,  $J = 6.8$  Hz, 3H).  $^{13}\text{C}$  NMR (100 MHz,  $\text{CDCl}_3$ )  $\delta$  142.3, 132.3, 130.1, 118.6, 111.4, 42.2, 38.9, 31.9, 29.6, 29.6, 29.5, 29.4, 29.3, 29.1, 28.7, 28.4, 22.7, 14.1. IR (film) 2922, 2852, 2229, 1606, 1504, 1461, 1414, 1234, 1079, 963, 842, 742, 652. HRMS (EI) Calcd for  $\text{C}_{20}\text{H}_{31}\text{NS}_3$  381.1619, Found 381.1626.

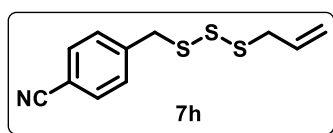

The reaction of allyl mercaptan (0.22 mmol, 1.1 equivalents, 18  $\mu\text{L}$ ),  $\text{B}(\text{C}_6\text{F}_5)_3$  (0.005 mmol, 2.5 mol%, 2.6 mg), 4-NCC $_6\text{H}_4\text{CH}_2\text{SSOMe}$  (0.2 mmol, 1 equivalent, 42.3 mg) in DCM (2 mL) at r.t. for 5 hours afforded compound **7h** in 86% yield (41.3 mg) as a colorless oil according to the general procedure E.  $^1\text{H}$  NMR (400 MHz,  $\text{CDCl}_3$ )  $\delta$  7.62 (d,  $J = 8.2$  Hz, 2H), 7.43 (d,  $J = 8.2$  Hz, 2H), 5.89-5.79 (m, 1H), 5.28-5.14 (m, 2H), 4.07 (s, 2H), 3.45 (d,  $J = 7.3$  Hz, 2H).  $^{13}\text{C}$  NMR (100 MHz,  $\text{CDCl}_3$ )  $\delta$  142.2, 132.4, 132.3, 130.1, 119.3, 118.6, 111.3, 42.3, 41.5. IR (film) 2979, 2913, 2229, 1923, 1632, 1606, 1505, 1414, 1223, 1103, 1073, 916, 844, 724, 649. HRMS (EI) Calcd for  $\text{C}_{11}\text{H}_{11}\text{NS}_3$  253.0544, Found 253.0049.

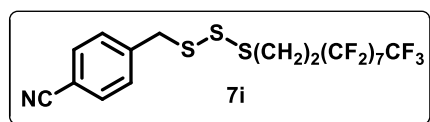

The reaction of thiol (0.22 mmol, 1.1 equivalents, 105.8 mg), 4-NCC $_6\text{H}_4\text{CH}_2\text{SSOMe}$  (0.2 mmol, 1 equivalent, 42.3 mg) in DCM (2 mL) at r.t. for 8 hours afforded compound **7i** in 78% yield (103.1 mg) as a white solid according to the general procedure E.  $^1\text{H}$  NMR (400 MHz,  $\text{CDCl}_3$ )  $\delta$  7.64 (d,  $J = 8.0$  Hz, 2H), 7.44 (d,  $J = 7.9$  Hz, 2H), 4.09 (s, 2H), 3.29 - 2.86 (m, 2H), 2.62-2.49 (m, 2H).  $^{19}\text{F}$  NMR (377 MHz,  $\text{CDCl}_3$ ) 19F NMR (376 MHz,  $\text{CDCl}_3$ )  $\delta$  -80.8 (3F, t,  $J = 9.9$  Hz), -[113.8(6)-113.9(3)] (2F, m,  $\text{CF}_2$ ), -[121.7-121.8] (2F, m,  $\text{CF}_2$ ), -122.0 (4F, s,  $2 \times \text{CF}_2$ ), -122.8 (2F, s,  $\text{CF}_2$ ), -123.3 (2F, s,  $\text{CF}_2$ ), -126.17 (2F, m,  $\text{CF}_2$ ).  $^{13}\text{C}$  NMR (100 MHz,  $\text{CDCl}_3$ )  $\delta$  141.8, 132.4, 130.2, 118.6, 111.6, 42.1, 31.3 (t,  $^2J_{\text{C-F}} = 22.2$  Hz), 28.8. IR (film) 2952, 2920, 2230, 1332, 1147, 1116, 953, 844, 703, 647. HRMS (EI) Calcd for  $\text{C}_{18}\text{H}_{10}\text{F}_{17}\text{NS}_3$  658.9704, Found 658.9711.

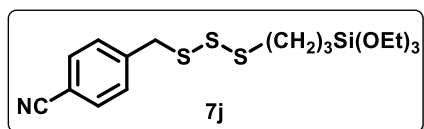

The reaction of thiol (0.22 mmol, 1.1 equivalents, 53  $\mu\text{L}$ ),  $\text{B}(\text{C}_6\text{F}_5)_3$  (0.005 mmol, 2.5 mol%, 2.6 mg),

4-NCC<sub>6</sub>H<sub>4</sub>CH<sub>2</sub>SSOMe (0.2 mmol, 1 equivalent, 42.3 mg) in DCM (2 mL) at r.t. for 5 hours afforded compound **7j** in 52% yield (43.6 mg) as a colorless oil according to the general procedure E. **<sup>1</sup>H NMR** (400 MHz, CDCl<sub>3</sub>) δ 7.61 (d, *J* = 7.9 Hz, 2H), 7.43 (d, *J* = 8.1 Hz, 2H), 4.06 (s, 2H), 3.81 (q, *J* = 7.0 Hz, 6H), 2.84 (t, *J* = 7.2 Hz, 2H), 1.87-1.80 (m, 2H), 1.21 (t, *J* = 7.0 Hz, 9H), 0.90 - 0.41 (m, 2H). **<sup>13</sup>C NMR** (100 MHz, CDCl<sub>3</sub>) δ 142.3, 132.3, 130.1, 118.7, 111.2, 58.4, 42.0, 41.5, 22.3, 18.3, 9.5. **IR** (film) 2974, 2888, 2229, 1606, 1390, 1242, 1165, 1075, 957, 785. **HRMS** (EI) Calcd for C<sub>17</sub>H<sub>27</sub>NO<sub>3</sub>S<sub>3</sub> 417.0922, Found 417.0914.

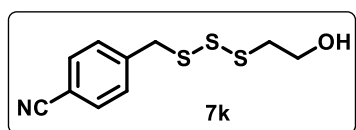

The reaction of 2-mercaptoethanol (0.22 mmol, 1.1 equivalents, 15.5 uL), B(C<sub>6</sub>F<sub>5</sub>)<sub>3</sub> (0.005 mmol, 2.5 mol%, 2.6 mg), 4-NCC<sub>6</sub>H<sub>4</sub>CH<sub>2</sub>SSOMe (0.2 mmol, 1 equivalent, 42.3 mg) in DCM (2 mL) at r.t. for 5 hours afforded compound **7k** in 89% yield (46 mg) as a white solid according to the general procedure E. **<sup>1</sup>H NMR** (400 MHz, CDCl<sub>3</sub>) δ 7.62 (d, *J* = 8.2 Hz, 2H), 7.43 (d, *J* = 8.0 Hz, 2H), 4.09 (s, 2H), 3.90 (t, *J* = 5.6 Hz, 2H), 2.98 (t, *J* = 5.8 Hz, 2H), 2.17 (s, 1H). **<sup>13</sup>C NMR** (100 MHz, CDCl<sub>3</sub>) δ 141.9, 132.3, 130.1, 118.6, 111.4, 59.6, 42.1, 41.4. **IR** (film) 3381, 2927, 2232, 1607, 1504, 1415, 1182, 1104, 1040, 1101, 842, 783, 650. **HRMS** (EI) Calcd for C<sub>10</sub>H<sub>11</sub>NOS<sub>3</sub> 257.0003, Found 257.0008.

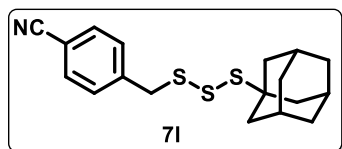

The reaction of 1-adamantanethiol (0.22 mmol, 1.1 equivalents, 37 mg), B(C<sub>6</sub>F<sub>5</sub>)<sub>3</sub> (0.005 mmol, 2.5 mol%, 2.6 mg), 4-NCC<sub>6</sub>H<sub>4</sub>CH<sub>2</sub>SSOMe (0.2 mmol, 1 equivalent, 42.3 mg) in DCM (2 mL) at r.t. for 5 hours afforded compound **7l** in 89% yield (62.2 mg) as a white solid according to the general procedure E. **<sup>1</sup>H NMR** (400 MHz, CDCl<sub>3</sub>) δ 7.61 (d, *J* = 8.2 Hz, 2H), 7.43 (d, *J* = 8.2 Hz, 2H), 4.06 (s, 2H), 2.08 (s, 3H), 1.88 (m, 6H), 1.74-1.63 (m, 6H); **<sup>13</sup>C NMR** (100 MHz, CDCl<sub>3</sub>) δ 142.4, 132.2, 130.1, 118.7, 111.1, 50.8, 42.4, 42.3, 35.9, 29.8; **IR** (film) 2905, 2851, 2229, 1607, 1504, 1448, 1414, 1295, 1038, 908, 840, 732, 651; **HRMS** (EI) Calcd for C<sub>18</sub>H<sub>21</sub>NS<sub>3</sub> 347.0836, Found 347.0829.

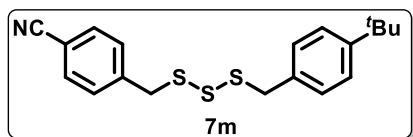

The reaction of 4-(tert-butyl)benzyl mercaptan (0.22 mmol, 1.1 equivalents, 39.8 mg), 4-NCC<sub>6</sub>H<sub>4</sub>CH<sub>2</sub>SSOMe (0.2 mmol, 1 equivalent, 42.3 mg) in DCM (2 mL) at r.t. for 8 hours afforded compound **7m** in 92% yield (66.4 mg) as a colorless oil according to the general procedure E. **<sup>1</sup>H NMR** (400 MHz, CDCl<sub>3</sub>)  $\delta$  7.61 (d,  $J$  = 8.3 Hz, 2H), 7.39 (d,  $J$  = 8.3 Hz, 2H), 7.36 (d,  $J$  = 8.3 Hz, 2H), 7.24 (d,  $J$  = 8.3 Hz, 2H), 4.04 (s, 2H), 3.98 (s, 2H), 1.31 (s, 9H). **<sup>13</sup>C NMR** (100 MHz, CDCl<sub>3</sub>)  $\delta$  150.8, 142.2, 133.1, 132.3, 130.1, 129.1, 125.6, 118.6, 111.4, 42.9, 42.3, 34.5, 31.3. **IR** (film) 3055, 2956, 2228, 1606, 1508, 1362, 1293, 1200, 970, 836, 657. **HRMS** (EI) Calcd for C<sub>19</sub>H<sub>21</sub>NS<sub>3</sub> 359.0836, Found 359.0838.

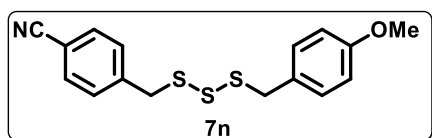

The reaction of 4-(Methoxy)benzyl mercaptan (0.22 mmol, 1.1 equivalents, 34 mg), 4-NCC<sub>6</sub>H<sub>4</sub>CH<sub>2</sub>SSOMe (0.2 mmol, 1 equivalent, 42.3 mg) in DCM (2 mL) at r.t. for 8 hours afforded compound **7n** in 87% yield (58.2 mg) as a colorless oil according to the general procedure E. **<sup>1</sup>H NMR** (400 MHz, CDCl<sub>3</sub>)  $\delta$  7.61 (d,  $J$  = 8.2 Hz, 2H), 7.40 (d,  $J$  = 8.2 Hz, 2H), 7.21 (d,  $J$  = 8.6 Hz, 2H), 6.86 (d,  $J$  = 8.7 Hz, 2H), 4.01 (s, 4H), 3.80 (s, 3H). **<sup>13</sup>C NMR** (100 MHz, CDCl<sub>3</sub>)  $\delta$  159.2, 142.3, 132.3, 132.3, 130.5, 130.1, 128.1, 118.6, 114.1, 114.0, 111.3, 55.3, 42.6, 42.2. **IR** (film) 3065, 2929, 2838, 2229, 1607, 1509, 1300, 1250, 1174, 1032, 825, 741, 649. **HRMS** (EI) Calcd for C<sub>16</sub>H<sub>15</sub>NOS<sub>3</sub> 333.0316, Found 333.0323.

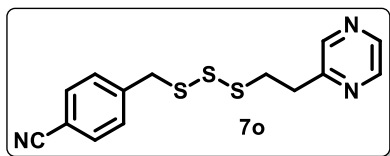

The reaction of 2-pyrazinylethanethiol (0.22 mmol, 1.1 equivalents, 30.8 mg), 4-NCC<sub>6</sub>H<sub>4</sub>CH<sub>2</sub>SSOMe (0.2 mmol, 1 equivalent, 42.3 mg) in DCM (2 mL) at r.t. for 8 hours afforded compound **7o** in 84% yield (53.8 mg) as a colorless oil according to the general procedure E. **<sup>1</sup>H NMR** (400 MHz, CDCl<sub>3</sub>)  $\delta$  8.54 - 8.40 (m, 3H), 7.60 (d,  $J$  = 8.3 Hz, 2H), 7.41 (d,  $J$  = 8.2 Hz, 2H), 4.06 (s, 2H), 3.25 (s, 4H). **<sup>13</sup>C NMR** (100 MHz, CDCl<sub>3</sub>)  $\delta$  154.8, 145.0, 144.3, 142.7, 142.0, 132.3, 130.1, 118.6, 111.4, 42.2, 37.3, 34.2. **IR** (film) 2974, 2229, 1720, 1517, 1476, 1403, 1212, 1160, 1058, 1017, 768. **HRMS** (ESI) Calcd for C<sub>14</sub>H<sub>13</sub>N<sub>3</sub>S<sub>3</sub> (M+H<sup>+</sup>) 320.0344, Found 320.0311.

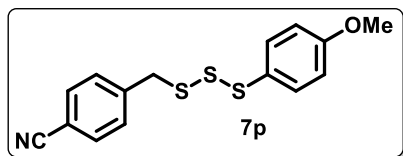

The reaction of 4-methoxythiophenol (0.22 mmol, 1.1 equivalents, 30.9 mg),  $\text{B}(\text{C}_6\text{F}_5)_3$  (0.005 mmol, 2.5 mol%, 2.6 mg), 4-NCC<sub>6</sub>H<sub>4</sub>CH<sub>2</sub>SSOMe (0.2 mmol, 1 equivalent, 42.3 mg) in DCM (2 mL) at r.t. for 5 hours afforded compound **7p** in 86% yield (55.4mg) as a colorless oil according to the general procedure E. **<sup>1</sup>H NMR** (400 MHz, CDCl<sub>3</sub>)  $\delta$  7.58 (d,  $J$  = 8.1 Hz, 2H), 7.53 (d,  $J$  = 8.7 Hz, 2H), 7.30 (d,  $J$  = 8.1 Hz, 2H), 6.89 (d,  $J$  = 8.7 Hz, 2H), 3.99 (s, 2H), 3.82 (s, 3H). **<sup>13</sup>C NMR** (100 MHz, CDCl<sub>3</sub>)  $\delta$  160.7, 142.1, 134.3, 132.2, 130.1, 127.2, 118.6, 114.8, 111.2, 55.4, 42.2. **IR** (film) 3056, 2974, 2226, 1587, 1490, 1459, 1291, 1245, 1174, 1024, 822, 634. **HRMS** (EI) Calcd for C<sub>15</sub>H<sub>13</sub>NOS<sub>3</sub> 319.0159, Found 319.0154.

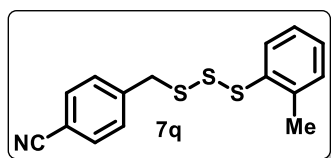

The reaction of 2-methylthiophenol (0.22 mmol, 1.1 equivalents, 27.4 mg),  $\text{B}(\text{C}_6\text{F}_5)_3$  (0.005 mmol, 2.5 mol%, 2.6 mg), 4-NCC<sub>6</sub>H<sub>4</sub>CH<sub>2</sub>SSOMe (0.2 mmol, 1 equivalent, 42.3 mg) in DCM (2 mL) at r.t. for 8 hours afforded compound **7q** in 95% yield (58.8 mg) as a colorless oil according to the general procedure E. **<sup>1</sup>H NMR** (400 MHz, CDCl<sub>3</sub>)  $\delta$  7.72-7.65 (m, 1H), 7.59 (d,  $J$  = 8.3 Hz, 2H), 7.31-7.19 (m, 5H), 3.99 (s, 2H), 2.46 (s, 3H). **<sup>13</sup>C NMR** (100 MHz, CDCl<sub>3</sub>)  $\delta$  142.1, 139.8, 135.2, 132.7, 132.3, 130.7, 130.1, 129.2, 126.7, 118.6, 111.4, 42.2, 20.7. **IR** (film) 2970, 2228, 1918, 1605, 1503, 1463, 1413, 1045, 842, 749, 707, 649. **HRMS** (EI) Calcd for C<sub>15</sub>H<sub>13</sub>NS<sub>3</sub> 303.0210, Found 303.0211.

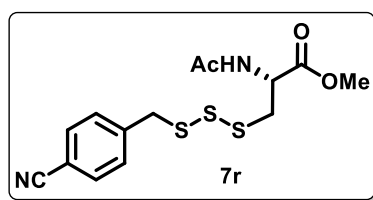

The reaction of RSH (0.22 mmol, 1.1 equivalents, 39 mg),  $\text{B}(\text{C}_6\text{F}_5)_3$  (0.005 mmol, 2.5 mol%, 2.6 mg), 4-NCC<sub>6</sub>H<sub>4</sub>CH<sub>2</sub>SSOMe (0.2 mmol, 1 equivalent, 42.3 mg) in DCM (0.5 mL) at r.t. for 24 hours afforded compound **7r** in 65% yield (46.6 mg) as a white solid according to the general procedure E. **<sup>1</sup>H NMR** (400 MHz, CDCl<sub>3</sub>)  $\delta$  7.62 (d,  $J$  = 7.9 Hz, 2H), 7.42 (d,  $J$  = 8.0 Hz, 2H), 6.38 (s, 1H), 4.94 (s, 1H), 4.08 (s, 2H), 3.76 (s, 3H), 3.38-3.29 (m, 2H), 2.03 (s, 3H). **<sup>13</sup>C NMR** (100 MHz, CDCl<sub>3</sub>)  $\delta$  170.6, 141.8, 132.4, 130.2, 118.6, 111.5, 77.3, 77.0, 76.7, 52.8, 51.6, 42.2, 40.8, 23.2. **IR** (film) 3330, 2920, 2851, 2230, 1711, 1609,

1533, 1416, 1373, 1209, 1123, 969, 826, 730, 648. **HRMS** (ESI) Calcd for  $C_{14}H_{16}N_2O_3S_3$  ( $M+Na^+$ ) 379.0215, Found 379.0208.

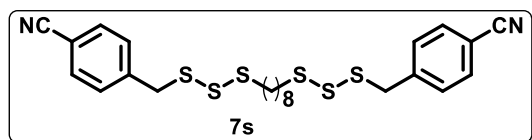

The reaction of 1,8-octanedithiol (0.11 mmol, 0.55 equivalent, 19.6 mg),  $B(C_6F_5)_3$  (0.005 mmol, 2.5 mol%, 2.6 mg), 4-NCC<sub>6</sub>H<sub>4</sub>CH<sub>2</sub>SSOMe (0.2 mmol, 1 equivalent, 42.3 mg) in DCM (2 mL) at r.t. for 5 hours afforded compound **7s** in 85% yield (46.1 mg) as a colorless oil according to the general procedure E. **<sup>1</sup>H NMR** (400 MHz, CDCl<sub>3</sub>)  $\delta$  7.62 (d,  $J$  = 8.2 Hz, 4H), 7.43 (d,  $J$  = 8.2 Hz, 4H), 4.07 (s, 4H), 2.80 (t,  $J$  = 7.3 Hz, 4H), 1.69 (dt,  $J$  = 14.7, 7.3 Hz, 4H), 1.37-1.30 (m, 8H). **<sup>13</sup>C NMR** (100 MHz, CDCl<sub>3</sub>)  $\delta$  142.3, 132.3, 130.1, 118.7, 111.3, 42.1, 38.7, 28.9, 28.6, 28.2. **IR** (film) 2924, 2853, 2227, 1606, 1503, 1413, 1291, 1233, 1051, 843, 721, 650. **HRMS** (ESI) Calcd for  $C_{22}H_{24}N_2O_2S_6$  ( $M+Na^+$ ) 559.0469, Found 559.0462.

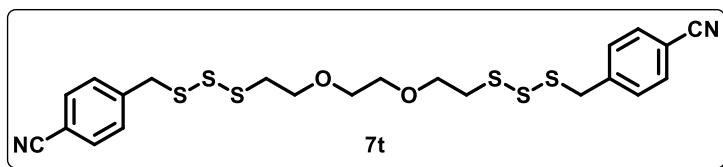

The reaction of 3,6-dioxo-1,8-octanedithiol (0.11 mmol, 0.55 equivalent, 20.1 mg),  $B(C_6F_5)_3$  (0.005 mmol, 2.5 mol%, 2.6 mg), 4-NCC<sub>6</sub>H<sub>4</sub>CH<sub>2</sub>SSOMe (0.2 mmol, 1 equivalent, 42.3 mg) in DCM (2 mL) at r.t. for 5 hours afforded compound **7t** in 79% yield (42.9 mg) as a white solid according to the general procedure E. **<sup>1</sup>H NMR** (400 MHz, CDCl<sub>3</sub>)  $\delta$  7.62 (d,  $J$  = 8.2 Hz, 4H), 7.43 (d,  $J$  = 8.2 Hz, 4H), 4.07 (s, 4H), 3.76 (t,  $J$  = 6.6 Hz, 4H), 3.63 (s, 4H), 3.01 (t,  $J$  = 6.6 Hz, 4H). **<sup>13</sup>C NMR** (100 MHz, CDCl<sub>3</sub>)  $\delta$  142.1, 132.3, 130.1, 118.6, 111.3, 70.4, 69.1, 42.0, 38.0. **IR** (film) 3063, 2854, 2227, 1605, 1503, 1417, 1325, 1290, 1196, 1103, 1068, 845, 737, 650. **HRMS** (ESI) Calcd for  $C_{22}H_{24}N_2O_2S_6$  ( $M+NH_4^+$ ) 558.0500, Found 558.0449.

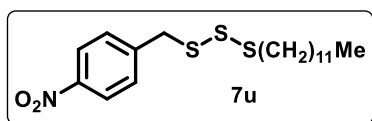

The reaction of 1-dodecanethiol (0.22 mmol, 1.1 equivalents, 44.5 mg),  $B(C_6F_5)_3$  (0.005 mmol, 2.5 mol%, 2.6 mg), 4-NO<sub>2</sub>C<sub>6</sub>H<sub>4</sub>CH<sub>2</sub>SSOMe (0.2 mmol, 1 equivalent, 46.3 mg) in DCM (2 mL) at r.t. for 5 hours afforded compound **7u** in 99% yield (79.4 mg) as a white solid according to the general procedure E. **<sup>1</sup>H NMR** (400

MHz, CDCl<sub>3</sub>)  $\delta$  8.19 (d,  $J$  = 8.7 Hz, 2H), 7.49 (d,  $J$  = 8.7 Hz, 2H), 4.11 (s, 2H), 2.81 (t,  $J$  = 7.2 Hz, 2H), 1.76-1.63 (m, 2H), 1.40-1.23 (m, 18H), 0.87 (t,  $J$  = 6.8 Hz, 3H). <sup>13</sup>C NMR (100 MHz, CDCl<sub>3</sub>)  $\delta$  147.2, 144.4, 130.2, 123.7, 41.6, 38.8, 31.9, 29.6, 29.5(8), 29.5, 29.4, 29.3, 29.1, 28.7, 28.4, 22.6, 14.1. IR (film) 2925, 2849, 1601, 1521, 1344, 1178, 962, 800, 705. HRMS (EI) Calcd for C<sub>19</sub>H<sub>31</sub>NO<sub>2</sub>S<sub>3</sub> 401.1517, Found 401.1519.

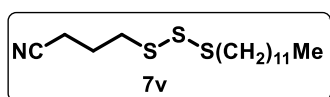

The reaction of 1-dodecanethiol (0.22 mmol, 1.1 equivalents, 44.5 mg), B(C<sub>6</sub>F<sub>5</sub>)<sub>3</sub> (0.005 mmol, 2.5 mol%, 2.6 mg), 4-NC(CH<sub>2</sub>)<sub>3</sub>SSOMe (0.2 mmol, 1 equivalent, 32.7 mg) in DCM (2 mL) at r.t. for 5 hours afforded compound **7v** in 99% yield (60.7 mg) as a colorless oil according to the general procedure E. <sup>1</sup>H NMR (400 MHz, CDCl<sub>3</sub>)  $\delta$  2.97 (t,  $J$  = 6.7 Hz, 2H), 2.86 (t,  $J$  = 7.2 Hz, 2H), 2.54 (t,  $J$  = 7.0 Hz, 2H), 2.19-2.12 (m, 2H), 1.76-1.69 (m, 2H), 1.41-1.21 (m, 18H), 0.87 (t,  $J$  = 6.8 Hz, 3H). <sup>13</sup>C NMR (100 MHz, CDCl<sub>3</sub>)  $\delta$  118.9, 38.8, 36.4, 31.8, 29.6, 29.6, 29.5, 29.4, 29.3, 29.1, 28.6, 28.4, 24.0, 22.6, 15.7, 14.1. IR (film) 2924, 2849, 2248, 1462, 1296, 971, 806, 723. HRMS (EI) Calcd for C<sub>16</sub>H<sub>31</sub>NS<sub>3</sub> 333.1619, Found 333.1619.

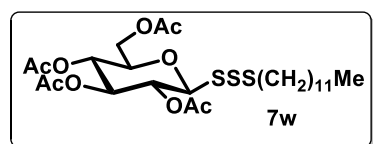

The reaction of 1-dodecanethiol (0.22 mmol, 1.1 equivalents, 44.5 mg), B(C<sub>6</sub>F<sub>5</sub>)<sub>3</sub> (0.005 mmol, 2.5 mol%, 2.6 mg), RSSOMe (0.2 mmol, 1 equivalent, 85.3 mg) in DCM (0.5 mL) at r.t. for 5 hours afforded compound **7w** in 88% yield (60.7 mg) as a white solid according to the general procedure E. <sup>1</sup>H NMR (400 MHz, CDCl<sub>3</sub>)  $\delta$  5.24-5.21 (m, 1H), 5.17-5.02 (m, 2H), 4.65 (d,  $J$  = 9.8 Hz, 1H), 4.26 (d of ABq,  $J$  = 12.5, 4.6 Hz, 1H), 4.12 (d of ABq,  $J$  = 12.4, 1.8 Hz, 1H), 3.76 (ddd,  $J$  = 9.8, 4.3, 2.0 Hz, 1H), 2.85 (t,  $J$  = 6.9 Hz, 2H), 2.05 (s, 3H), 2.00 (s, 3H), 1.99 (s, 3H), 1.97 (s, 3H), 1.71-1.63 (m, 2H), 1.42-1.16 (m, 18H), 0.84 (t,  $J$  = 6.7 Hz, 3H). <sup>13</sup>C NMR (100 MHz, CDCl<sub>3</sub>)  $\delta$  170.4, 170.0, 169.2, 169.0, 87.6, 76.3, 73.7, 69.6, 67.9, 61.8, 39.2, 31.8, 29.5, 29.4(5), 29.3, 29.2, 29.1, 28.6, 28.3, 22.6, 20.6(4), 20.6(3), 20.5(7), 20.5(6), 20.4(5), 14.0. IR (film) 2978, 2904, 1745, 1403, 1227, 1005, 892. HRMS (ESI) Calcd for C<sub>26</sub>H<sub>44</sub>O<sub>9</sub>S<sub>3</sub> (M+Na<sup>+</sup>) 619.2039, Found 619.2040.

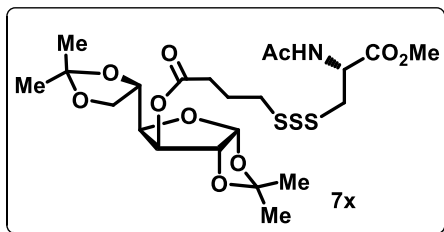

The reaction of RSH (0.22 mmol, 1.1 equivalents, 39 mg),  $B(C_6F_5)_3$  (0.005 mmol, 2.5 mol%, 2.6 mg), RSSOMe (0.2 mmol, 1 equivalent, 84.9 mg) in DCM (0.5 mL) at r.t. for 5 hours afforded compound **7x** in 60% yield

(68.3 mg) as a colorless oil according to the general procedure E.  $^1H$  NMR (400 MHz,  $CDCl_3$ )  $\delta$  6.48 (d,  $J$  = 7.1 Hz, 1H), 5.85 (d,  $J$  = 3.6 Hz, 1H), 5.25 (s, 1H), 4.92 (dt,  $J$  = 7.7, 4.9 Hz, 1H), 4.46 (d,  $J$  = 3.6 Hz, 1H), 4.16 (s, 2H), 4.09-4.04 (m, 1H), 4.01-3.94 (m, 1H), 3.75 (s, 3H), 3.45-3.27 (m, 2H), 2.90 (t,  $J$  = 7.0 Hz, 2H), 2.48 (t,  $J$  = 7.1 Hz, 2H), 2.14-2.01 (m, 5H), 1.48 (s, 3H), 1.37 (s, 3H), 1.28 (s, 3H), 1.27 (s, 3H).  $^{13}C$  NMR (100 MHz,  $CDCl_3$ )  $\delta$  171.3, 170.6, 169.8, 112.2, 109.3, 105.0, 83.3, 79.8, 76.1, 72.4, 67.3, 52.7, 51.6, 40.6, 37.4, 32.4, 26.8, 26.6, 26.1, 25.2, 23.6, 23.0. IR (film) 3304, 2986, 2939, 1743, 1660, 1528, 1375, 1213, 1162, 1073, 1021, 846, 732, 642. HRMS (ESI) Calcd for  $C_{22}H_{35}NO_{10}S_3$  ( $M+Na^+$ ) 592.1315, Found 592.1344.

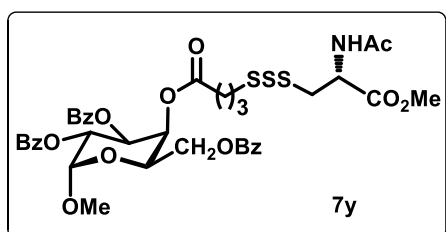

The reaction of RSH (0.22 mmol, 1.1 equivalents, 39 mg),  $B(C_6F_5)_3$  (0.005 mmol, 2.5 mol%, 2.6 mg), RSSOMe (0.2 mmol, 1 equivalent, 134.2 mg) in DCM (0.5 mL) at r.t. for 5 hours afforded compound **7y** in 40% yield (65.2 mg) as a white solid according to the general procedure E.

$^1H$  NMR (400 MHz,  $CDCl_3$ )  $\delta$  8.02 (d,  $J$  = 7.3 Hz, 2H), 7.99 (d,  $J$  = 7.4 Hz, 2H), 7.88 (d,  $J$  = 7.3 Hz, 2H), 7.59-7.48 (m, 3H), 7.44 (t,  $J$  = 7.7 Hz, 2H), 7.40-7.34 (m, 4H), 6.52 (d,  $J$  = 7.5 Hz, 1H), 5.91-5.77 (m, 2H), 5.60 (d of ABq,  $J$  = 10.6, 3.6 Hz, 1H), 5.22 (d,  $J$  = 3.5 Hz, 1H), 4.93 (dt,  $J$  = 7.6, 5.0 Hz, 1H), 4.53-4.48 (m, 2H), 4.39-4.33 (m, 1H), 3.75 (s, 3H), 3.47 (s, 3H), 3.37-3.36 (m, 2H), 2.89-2.74 (m, 2H), 2.62 (t,  $J$  = 7.2 Hz, 2H), 2.09-1.99 (m, 5H).  $^{13}C$  NMR (100 MHz,  $CDCl_3$ )  $\delta$  171.8, 170.7, 169.8, 166.1, 166.0, 165.4, 133.4, 133.3(1), 133.3(0), 129.8, 129.7, 129.5, 129.4, 129.2, 129.1, 128.5, 128.4, 97.6, 68.9, 68.6, 68.4, 66.5, 62.3, 55.7, 52.7, 51.6, 40.7, 37.5, 32.1, 23.5, 23.1. IR (film) 3376, 2976, 2904, 1723, 1678, 1375, 1262, 1066, 710. HRMS (ESI) Calcd for  $C_{38}H_{41}NO_{13}S_3$  ( $M+Na^+$ ) 838.1632, Found 838.1664.

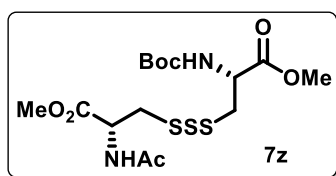

The reaction of RSH (0.22 mmol, 1.1 equivalents, 39 mg),  $B(C_6F_5)_3$  (0.005 mmol, 2.5 mol%, 2.6 mg), 4-RSSOMe (0.2 mmol, 1 equivalent, 59.5 mg) in DCM (0.5 mL) at r.t. for 24 hours afforded compound **7z** in 98% yield (86.7

mg) as a white solid according to the general procedure E.  **$^1H$  NMR** (400 MHz,  $CDCl_3$ )  $\delta$  6.69 (brs, 1H), 5.49 (brs, 1H), 4.86 (s, 1H), 4.61 (s, 1H), 3.72 (s, 3H), 3.72 (s, 3H), 3.35-3.31 (m, 4H), 2.01 (s, 3H), 1.39 (s, 9H).  **$^{13}C$  NMR** (125 MHz,  $CDCl_3$ )  $\delta$  170.8, 170.6, 170.0, 154.9, 80.2, 52.7, 52.7, 52.6, 51.5, 41.3, 40.6, 28.1, 22.9. **IR** (film) 3337, 2973, 1743, 1712, 1664, 1517, 1369, 1216, 1163, 1050, 782. **HRMS** (EI) Calcd for  $C_{15}H_{26}N_2O_7S_3$  442.0902, Found 442.0907.

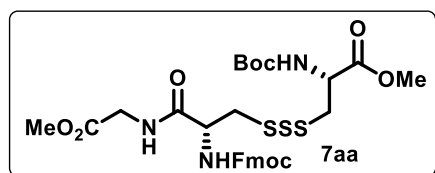

The reaction of RSH (0.22 mmol, 1.1 equivalents, 91.2 mg),  $B(C_6F_5)_3$  (0.005 mmol, 2.5 mol%, 2.6 mg), RSSOMe (0.2 mmol, 1 equivalent, 59.5 mg) in DMF (0.5 mL) at r.t. for

8 hours afforded compound **7aa** in 52% yield (70.6 mg) as a colorless oil according to the general procedure E.  **$^1H$  NMR** (400 MHz,  $DMSO-d_6$ )  $\delta$  8.53 (t,  $J = 5.6$  Hz, 1H), 7.89 (d,  $J = 7.5$  Hz, 2H), 7.78 (d,  $J = 8.5$  Hz, 1H), 7.73 (d,  $J = 7.4$  Hz, 2H), 7.42 (t,  $J = 7.5$  Hz, 3H), 7.33 (t,  $J = 7.4$  Hz, 2H), 4.55-4.30 (m, 3H), 4.29-4.20 (m, 2H), 3.96-3.76 (m, 2H), 3.65 (s, 3H), 3.63 (s, 3H), 3.34-3.22 (m, 2H), 3.12 (td,  $J = 14.0, 10.1$  Hz, 2H), 1.38 (s, 9H).  **$^{13}C$  NMR** (100 MHz,  $DMSO-d_6$ )  $\delta$  170.6, 169.9, 169.4, 155.4, 154.8, 143.3, 140.2, 127.1, 126.5, 124.8, 119.6, 78.1, 65.3, 53.1, 52.1, 51.7, 51.2, 46.1, 40.6, 39.7, 38.5, 27.6. **IR** (film) 3330, 2977, 2903, 1691, 1519, 1403, 1223, 1163, 1049, 866, 739. **HRMS** (EI) Calcd for  $C_{30}H_{37}N_3O_9S_3$  ( $M+Na^+$ ) 702.1584, Found 702.1598.

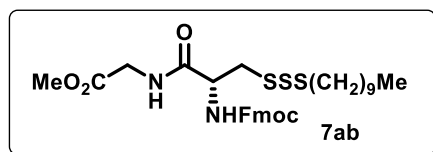

The reaction of RSH (0.22 mmol, 1.1 equivalents, 91.2 mg),  $B(C_6F_5)_3$  (0.005 mmol, 2.5 mol%, 2.6 mg), Me $(CH_2)_9$ SSOMe (0.2 mmol, 1 equivalent,

47.3 mg) in DCM (2 mL) at r.t. for 8 hours afforded compound **7ab** in 60% yield (74.3 mg) as a colorless oil according to the general procedure E.  **$^1H$  NMR** (400 MHz,  $CDCl_3$ )  $\delta$  7.76 (d,  $J = 7.5$  Hz, 2H), 7.60 (d,  $J = 7.3$  Hz, 2H), 7.40 (t,  $J = 7.4$  Hz, 2H), 7.33-7.29 (m, 2H), 6.90 (s, 1H), 5.80 (s, 1H), 4.65 (s, 1H), 4.47-4.45 (d,  $J = 6.7$  Hz, 2H), 4.23 (t,  $J = 6.8$  Hz, 1H), 4.12-3.99 (m, 2H), 3.75 (s, 3H), 3.44-3.35 (m, 1H),

3.27-3.22 (m, 1H), 2.87 (t,  $J = 7.3$  Hz, 2H), 1.75-1.68 (m, 2H), 1.39-1.34 (m, 2H), 1.30-1.22 (m, 12H), 0.88 (t,  $J = 6.8$  Hz, 3H).  $^{13}\text{C}$  NMR (100 MHz,  $\text{CDCl}_3$ )  $\delta$  170.1, 169.8, 156.1, 143.7, 141.3, 127.8, 127.1, 125.1, 120.0, 67.4, 53.8, 52.5, 47.2, 41.4, 41.2, 38.9, 31.9, 29.5, 29.4(9), 29.3, 29.2, 28.8, 28.5, 22.7, 14.1. **IR** (film) 3293, 2976, 2908, 1741, 1692, 1651, 1533, 1403, 1255, 1051, 893, 734, 663. **HRMS** (ESI) Calcd for  $\text{C}_{31}\text{H}_{42}\text{N}_2\text{O}_5\text{S}_3$  ( $\text{M}+\text{H}^+$ ) 619.2329, Found 619.2326.

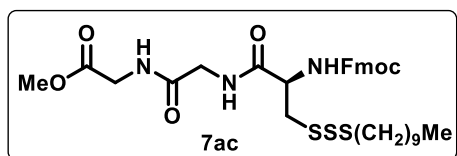

The reaction of RSH (0.22 mmol, 1.1 equivalents, 103.8 mg),  $\text{B}(\text{C}_6\text{F}_5)_3$  (0.005 mmol, 2.5 mol%, 2.6 mg),  $\text{Me}(\text{CH}_2)_9\text{SSOMe}$  (0.2 mmol, 1 equivalent, 47.3 mg) in DCM (2 mL) at r.t. for 8 hours afforded compound **7ab** in 50% yield (67.5mg) as a colorless oil according to the general procedure E.  $^1\text{H}$  NMR (400 MHz,  $\text{CDCl}_3$ )  $\delta$  7.75 (d,  $J = 7.5$  Hz, 2H), 7.59 (d,  $J = 7.3$  Hz, 2H), 7.39 (t,  $J = 7.4$  Hz, 2H), 7.30 (t,  $J = 7.4$  Hz, 2H), 7.21 (brs, 1H), 6.98 (brs, 1H), 5.94 (brs, 1H), 4.57 (s, 1H), 4.44 (m, 2H), 4.21 (t,  $J = 6.8$  Hz, 1H), 4.16 - 3.84 (m, 4H), 3.69 (s, 3H), 3.31 (d,  $J = 4.7$  Hz, 2H), 2.85 (t,  $J = 7.3$  Hz, 2H), 1.70 (m, 2H), 1.40 - 1.21 (m, 14H), 0.88 (t,  $J = 6.8$  Hz, 3H).  $^{13}\text{C}$  NMR (100 MHz,  $\text{CDCl}_3$ )  $\delta$  170.5, 170.1, 168.8, 156.3, 143.6, 141.3, 127.8, 127.1, 125.0, 120.0, 67.4, 54.1, 52.3, 47.1, 43.1, 41.1, 40.6, 38.8, 31.8, 29.5, 29.4(5), 29.2, 29.1, 28.7, 28.5, 22.6, 14.1. **IR** (film) 3292, 2970, 2921, 1742, 1689, 1644, 1529, 1404, 1257, 1068, 802, 736, 668. **HRMS** (ESI) Calcd for  $\text{C}_{33}\text{H}_{45}\text{N}_3\text{O}_6\text{S}_3$  ( $\text{M}+\text{Na}^+$ ) 698.2363, Found 698.2362.

## Gram scale operation

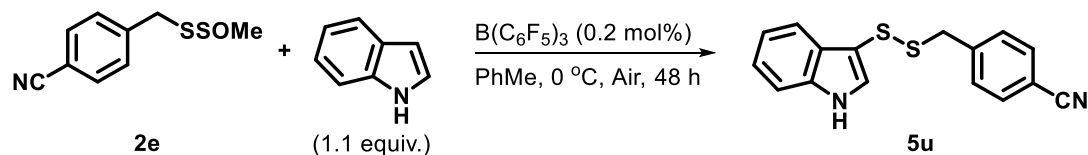

To a Schlenk tube were added indole (5.5 mmol, 1.1 equivalents, 644 mg),  $\text{B}(\text{C}_6\text{F}_5)_3$  (0.01 mmol, 0.2 mol%, 5.1 mg), RSSOMe (5 mmol, 1 equivalent, 1.057 g), and toluene (1 mL), the mixture was stirred at 0 °C for 48 hours before it was concentrated under vacuum. Purification by column chromatography afforded the desired product in yield of 93% (1.38 g).

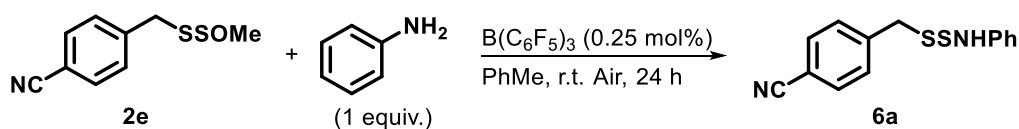

To a Schlenk tube were added amine (5 mmol, 1 equivalent, 465.7 mg),  $\text{B}(\text{C}_6\text{F}_5)_3$  (0.0125 mmol, 0.25 mol%, 6.5 mg), RSSOMe (0.2 mmol, 1 equivalent, 1.057 g), and toluene (1 mL), the mixture was stirred at r.t. for 24 hours before it was concentrated under vacuum. Purification by column chromatography afforded the desired product in yield of 81% (1.1 g).

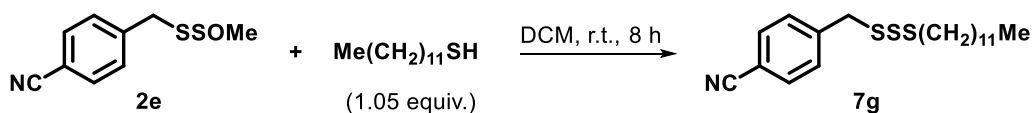

To a Schlenk tube were added thiol (5.25 mmol, 1.05 equivalents, 1.063 g), RSSOMe (0.2 mmol, 1 equivalent, 1.057 g), and DCM (10 mL), the mixture was stirred at r.t. for 6 hours before it was concentrated under vacuum. Purification by column chromatography afforded the desired product in yield of 92% (1.76 g).

## X-ray Crystallography Analysis

### Compound 3a (CCDC-1565934)

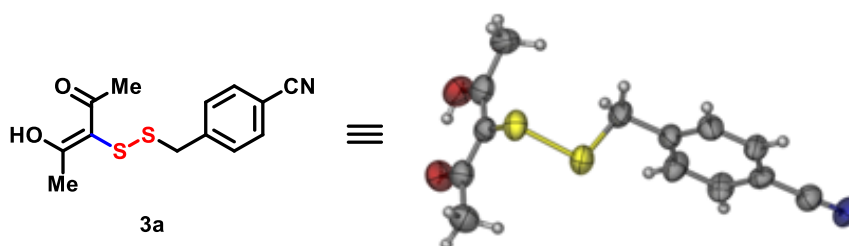

### Datablock: z

|                                                               |                                                         |                                 |
|---------------------------------------------------------------|---------------------------------------------------------|---------------------------------|
| Bond precision:                                               | C-C = 0.0112 Å                                          | Wavelength=0.71073              |
| Cell:                                                         | a=7.509(3)      b=7.826(3)      c=12.235(5)             |                                 |
|                                                               | alpha=76.567(13)    beta=86.274(15)    gamma=79.030(13) |                                 |
| Temperature: 296 K                                            |                                                         |                                 |
|                                                               | Calculated                                              | Reported                        |
| Volume                                                        | 686.4(5)                                                | 686.5(4)                        |
| Space group                                                   | P -1                                                    | P-1                             |
| Hall group                                                    | -P 1                                                    | ?                               |
| Moiety formula                                                | C13 H13 N O2 S2                                         | ?                               |
| Sum formula                                                   | C13 H13 N O2 S2                                         | C13 H13 N O2 S2                 |
| Mr                                                            | 279.36                                                  | 279.36                          |
| Dx, g cm <sup>-3</sup>                                        | 1.352                                                   | 1.352                           |
| Z                                                             | 2                                                       | 2                               |
| Mu (mm <sup>-1</sup> )                                        | 0.381                                                   | 0.381                           |
| F000                                                          | 292.0                                                   | 292.0                           |
| F000'                                                         | 292.60                                                  |                                 |
| h, k, lmax                                                    | 8, 9, 14                                                | 8, 9, 14                        |
| Nref                                                          | 2419                                                    | 2398                            |
| Tmin, Tmax                                                    | 0.852, 0.920                                            | 0.857, 0.921                    |
| Tmin'                                                         | 0.852                                                   |                                 |
| Correction method= # Reported T Limits: Tmin=0.857 Tmax=0.921 |                                                         |                                 |
| AbsCorr = MULTI-SCAN                                          |                                                         |                                 |
| Data completeness=                                            | 0.991                                                   | Theta(max)= 25.010              |
| R(reflections)=                                               | 0.0990( 1287)                                           | wR2(reflections)= 0.3072( 2398) |
| S =                                                           | 1.036                                                   | Npar= 163                       |

The following ALERTS were generated. Each ALERT has the format

**test-name\_ALERT\_alert-type\_alert-level.**

Click on the hyperlinks for more details of the test.

#### ●Alert level B

PLAT340\_ALERT\_3\_B Low Bond Precision on C-C Bonds ..... 0.01125 Ang.

#### ●Alert level C

PLAT084\_ALERT\_3\_C High wR2 Value (i.e. > 0.25) ..... 0.31 Report

#### ●Alert level G

|                                                                                 |             |
|---------------------------------------------------------------------------------|-------------|
| PLAT005_ALERT_5_G No Embedded Refinement Details found in the CIF               | Please Do ! |
| PLAT007_ALERT_5_G Number of Unrefined Donor-H Atoms .....                       | 1 Report    |
| PLAT066_ALERT_1_G Predicted and Reported Tmin&Tmax Range Identical              | ? Check     |
| PLAT072_ALERT_2_G SHELXL First Parameter in WGHT Unusually Large                | 0.18 Report |
| PLAT380_ALERT_4_G Incorrectly? Oriented X(sp <sup>2</sup> )-Methyl Moiety ..... | C11 Check   |
| PLAT380_ALERT_4_G Incorrectly? Oriented X(sp <sup>2</sup> )-Methyl Moiety ..... | C13 Check   |
| PLAT710_ALERT_4_G Delete 1-2-3 or 2-3-4 Linear Torsion Angle ... #              | 2 Do !      |
| N1 -C1 -C2 -C3 72.00 13.00 1.555 1.555 1.555 1.555                              |             |
| PLAT710_ALERT_4_G Delete 1-2-3 or 2-3-4 Linear Torsion Angle ... #              | 3 Do !      |

**Supplementary Figure 1.** Single-Crystal X-ray Crystallography of **3a**.

## Compound 5o (CCDC-1565935)

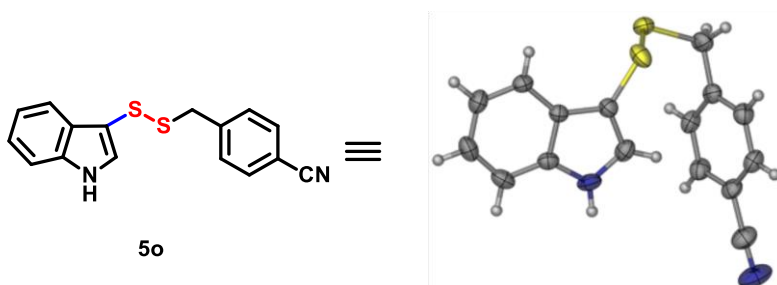

### Datablock: z

|                    |                                                |                    |
|--------------------|------------------------------------------------|--------------------|
| Bond precision:    | C-C = 0.0021 Å                                 | Wavelength=0.71073 |
| Cell:              | a=9.2933(2)      b=8.8912(2)      c=17.7846(4) |                    |
|                    | alpha=90      beta=103.798(1)      gamma=90    |                    |
| Temperature: 296 K |                                                |                    |

  

|                        | Calculated    | Reported      |
|------------------------|---------------|---------------|
| Volume                 | 1427.11(6)    | 1427.11(5)    |
| Space group            | P 21/c        | P2(1)/c       |
| Hall group             | -P 2ybc       | ?             |
| Moiety formula         | C16 H12 N2 S2 | ?             |
| Sum formula            | C16 H12 N2 S2 | C16 H12 N2 S2 |
| Mr                     | 296.40        | 296.40        |
| Dx, g cm <sup>-3</sup> | 1.380         | 1.380         |
| Z                      | 4             | 4             |
| Mu (mm <sup>-1</sup> ) | 0.363         | 0.363         |
| F000                   | 616.0         | 616.0         |
| F000'                  | 617.16        |               |
| h, k, lmax             | 11, 10, 21    | 11, 10, 21    |
| Nref                   | 2517          | 2512          |
| Tmin, Tmax             | 0.881, 0.927  | 0.839, 0.928  |
| Tmin'                  | 0.834         |               |

Correction method= # Reported T Limits: Tmin=0.839 Tmax=0.928  
AbsCorr = MULTI-SCAN  
Data completeness= 0.998      Theta(max)= 25.010  
R(reflections)= 0.0286( 2301)      wR2(reflections)= 0.0828( 2512)  
S = 0.988      Npar= 181

The following ALERTS were generated. Each ALERT has the format

**test-name\_ALERT\_alert-type\_alert-level.**

Click on the hyperlinks for more details of the test.

#### Alert level G

|                   |                                                       |             |
|-------------------|-------------------------------------------------------|-------------|
| PLAT005_ALERT_5_G | No Embedded Refinement Details found in the CIF       | Please Do ! |
| PLAT007_ALERT_5_G | Number of Unrefined Donor-H Atoms .....               | 1 Report    |
| PLAT066_ALERT_1_G | Predicted and Reported Tmin&Tmax Range Identical      | ? Check     |
| PLAT230_ALERT_2_G | Hirshfeld Test Diff for C12 -- C16 ..                 | 5.9 s.u.    |
| PLAT710_ALERT_4_G | Delete 1-2-3 or 2-3-4 Linear Torsion Angle ... #      | 37 Do !     |
|                   | C11 -C12 -C16 -N2 -85.00 5.00 1.555 1.555 1.555 1.555 |             |
| PLAT710_ALERT_4_G | Delete 1-2-3 or 2-3-4 Linear Torsion Angle ... #      | 38 Do !     |
|                   | C13 -C12 -C16 -N2 92.00 5.00 1.555 1.555 1.555 1.555  |             |
| PLAT899_ALERT_4_G | SHELXL97 is Deprecated and Succeeded by SHELXL        | 2014 Note   |

0 **ALERT level A** = Most likely a serious problem - resolve or explain  
0 **ALERT level B** = A potentially serious problem, consider carefully  
0 **ALERT level C** = Check. Ensure it is not caused by an omission or oversight  
7 **ALERT level G** = General information/check it is not something unexpected

## Supplementary Figure 2. Single-Crystal X-ray Crystallography of 5o.

## Compound 6a (CCDC-1565936)

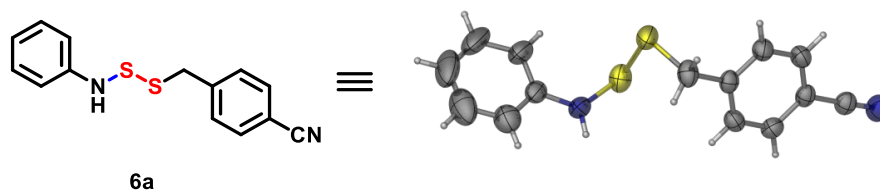

### Datablock: z

|                        |                                                  |                                 |
|------------------------|--------------------------------------------------|---------------------------------|
| Bond precision:        | C-C = 0.0042 Å                                   | Wavelength=0.71073              |
| Cell:                  | a=15.913(3)      b=11.4032(17)      c=7.8620(12) |                                 |
|                        | alpha=90      beta=103.384(5)      gamma=90      |                                 |
| Temperature: 296 K     |                                                  |                                 |
|                        | Calculated                                       | Reported                        |
| Volume                 | 1387.9(4)                                        | 1387.9(4)                       |
| Space group            | P 21/c                                           | P2(1)/c                         |
| Hall group             | -P 2ybc                                          | ?                               |
| Moiety formula         | C14 H12 N2 S2                                    | ?                               |
| Sum formula            | C14 H12 N2 S2                                    | C14 H12 N2 S2                   |
| Mr                     | 272.38                                           | 272.38                          |
| Dx, g cm <sup>-3</sup> | 1.304                                            | 1.304                           |
| Z                      | 4                                                | 4                               |
| Mu (mm <sup>-1</sup> ) | 0.367                                            | 0.367                           |
| F000                   | 568.0                                            | 568.0                           |
| F000'                  | 569.14                                           |                                 |
| h, k, lmax             | 18, 13, 9                                        | 18, 13, 9                       |
| Nref                   | 2445                                             | 2444                            |
| Tmin, Tmax             | 0.851, 0.971                                     | 0.855, 0.971                    |
| Tmin'                  | 0.851                                            |                                 |
| Correction method=     | # Reported T Limits: Tmin=0.855 Tmax=0.971       |                                 |
| AbsCorr =              | MULTI-SCAN                                       |                                 |
| Data completeness=     | 1.000                                            | Theta(max)= 25.010              |
| R(reflections)=        | 0.0405( 1731)                                    | wR2(reflections)= 0.1038( 2444) |
| S =                    | 1.027                                            | Npar= 163                       |

The following ALERTS were generated. Each ALERT has the format

**test-name\_ALERT\_alert-type\_alert-level.**

Click on the hyperlinks for more details of the test.

#### Alert level C

PLAT241\_ALERT\_2\_C High 'MainMol' Ueq as Compared to Neighbors of C5 Check  
 PLAT242\_ALERT\_2\_C Low 'MainMol' Ueq as Compared to Neighbors of C1 Check  
 PLAT340\_ALERT\_3\_C Low Bond Precision on C-C Bonds ..... 0.00421 Ang.

#### Alert level G

PLAT005\_ALERT\_5\_G No Embedded Refinement Details found in the CIF Please Do !  
 PLAT007\_ALERT\_5\_G Number of Unrefined Donor-H Atoms ..... 1 Report  
 PLAT066\_ALERT\_1\_G Predicted and Reported Tmin&Tmax Range Identical ? Check  
 PLAT710\_ALERT\_4\_G Delete 1-2-3 or 2-3-4 Linear Torsion Angle ... # 26 Do !  
     C10 -C11 -C14 -N2   0.00 8.00 1.555 1.555 1.555 1.555  
 PLAT710\_ALERT\_4\_G Delete 1-2-3 or 2-3-4 Linear Torsion Angle ... # 27 Do !  
     C12 -C11 -C14 -N2   18.00 0.00 1.555 1.555 1.555 1.555  
 PLAT899\_ALERT\_4\_G SHELXL97 is Deprecated and Succeeded by SHELXL 2014 Note

0 **ALERT level A** = Most likely a serious problem - resolve or explain

## Supplementary Figure 3. Single-Crystal X-ray Crystallography of 6a.

## Compound 7d (CCDC-1565937)

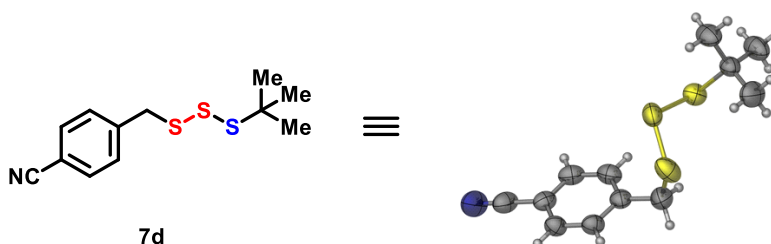

### Datablock: z

|                        |                                            |                                 |
|------------------------|--------------------------------------------|---------------------------------|
| Bond precision:        | C-C = 0.0030 Å                             | Wavelength=0.71073              |
| Cell:                  | a=15.2714(5) b=7.7707(2) c=12.0037(4)      |                                 |
|                        | alpha=90 beta=93.036(1) gamma=90           |                                 |
| Temperature: 296 K     |                                            |                                 |
|                        | Calculated                                 | Reported                        |
| Volume                 | 1422.47(8)                                 | 1422.47(8)                      |
| Space group            | P 21/c                                     | P2(1)/c                         |
| Hall group             | -P 2ybc                                    | ?                               |
| Moiety formula         | C12 H15 N S3                               | ?                               |
| Sum formula            | C12 H15 N S3                               | C12 H15 N S3                    |
| Mr                     | 269.43                                     | 269.43                          |
| Dx, g cm <sup>-3</sup> | 1.258                                      | 1.258                           |
| Z                      | 4                                          | 4                               |
| Mu (mm <sup>-1</sup> ) | 0.496                                      | 0.496                           |
| F000                   | 568.0                                      | 568.0                           |
| F000'                  | 569.61                                     |                                 |
| h, k, lmax             | 18, 9, 14                                  | 18, 9, 14                       |
| Nref                   | 2511                                       | 2505                            |
| Tmin, Tmax             | 0.841, 0.915                               | 0.838, 0.916                    |
| Tmin'                  | 0.832                                      |                                 |
| Correction method=     | # Reported T Limits: Tmin=0.838 Tmax=0.916 |                                 |
| AbsCorr =              | MULTI-SCAN                                 |                                 |
| Data completeness=     | 0.998                                      | Theta(max)= 25.010              |
| R(Reflections)=        | 0.0328( 2125)                              | wR2(Reflections)= 0.0899( 2505) |
| S =                    | 1.031                                      | Npar= 145                       |

The following ALERTS were generated. Each ALERT has the format

**test-name\_ALERT\_alert-type\_alert-level.**

Click on the hyperlinks for more details of the test.

#### Alert level C

PLAT242\_ALERT\_2\_C Low 'MainMol' Ueq as Compared to Neighbors of C9 Check  
PLAT790\_ALERT\_4\_C Centre of Gravity not Within Unit Cell: Resd. # 1 Note  
C12 H15 N S3

#### Alert level G

PLAT005\_ALERT\_5\_G No Embedded Refinement Details found in the CIF Please Do !  
PLAT066\_ALERT\_1\_G Predicted and Reported Tmin&Tmax Range Identical ? Check  
PLAT710\_ALERT\_4\_G Delete 1-2-3 or 2-3-4 Linear Torsion Angle ... # 13 Do !  
C2 -C3 -C7 -N1 32.00 75.00 1.555 1.555 1.555 1.555  
PLAT710\_ALERT\_4\_G Delete 1-2-3 or 2-3-4 Linear Torsion Angle ... # 14 Do !  
C4 -C3 -C7 -N1 15.00 0.00 1.555 1.555 1.555 1.555  
PLAT899\_ALERT\_4\_G SHELXL97 is Deprecated and Succeeded by SHELXL 2014 Note

0 **ALERT level A** = Most likely a serious problem - resolve or explain

0 **ALERT level B** = A potentially serious problem, consider carefully

## Supplementary Figure 4. Single-Crystal X-ray Crystallography of 7d.

All these data can be obtained free of charge from Cambridge Crystallographic

Data Centre via [www.ccdc.cam.ac.uk/data\\_request/ci](http://www.ccdc.cam.ac.uk/data_request/ci).

## NMR Spectra

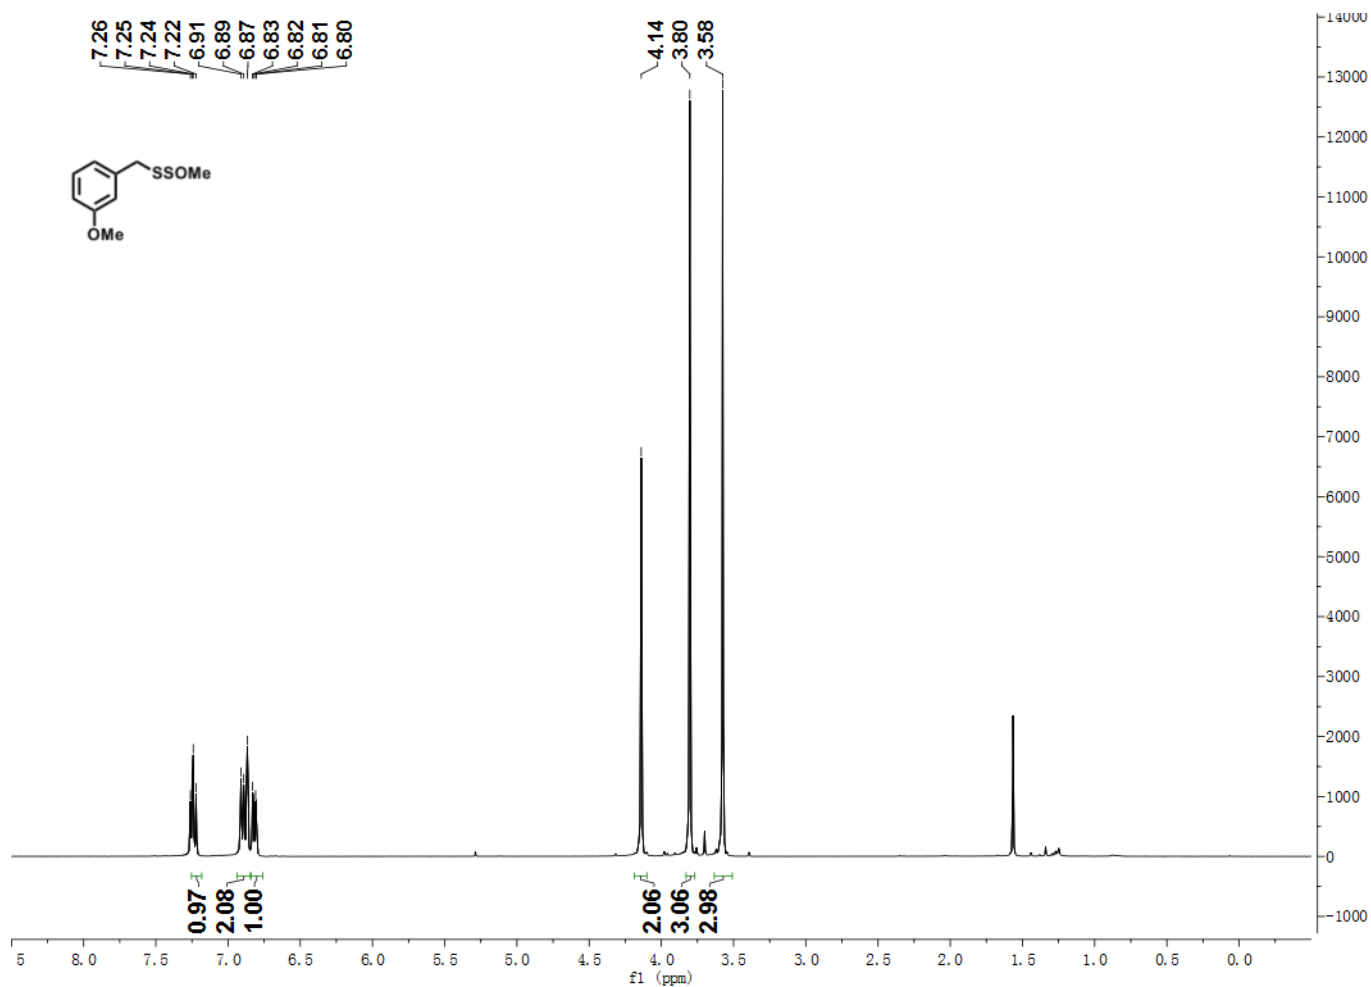

Supplementary Figure 5. <sup>1</sup>H NMR spectra for 2a.

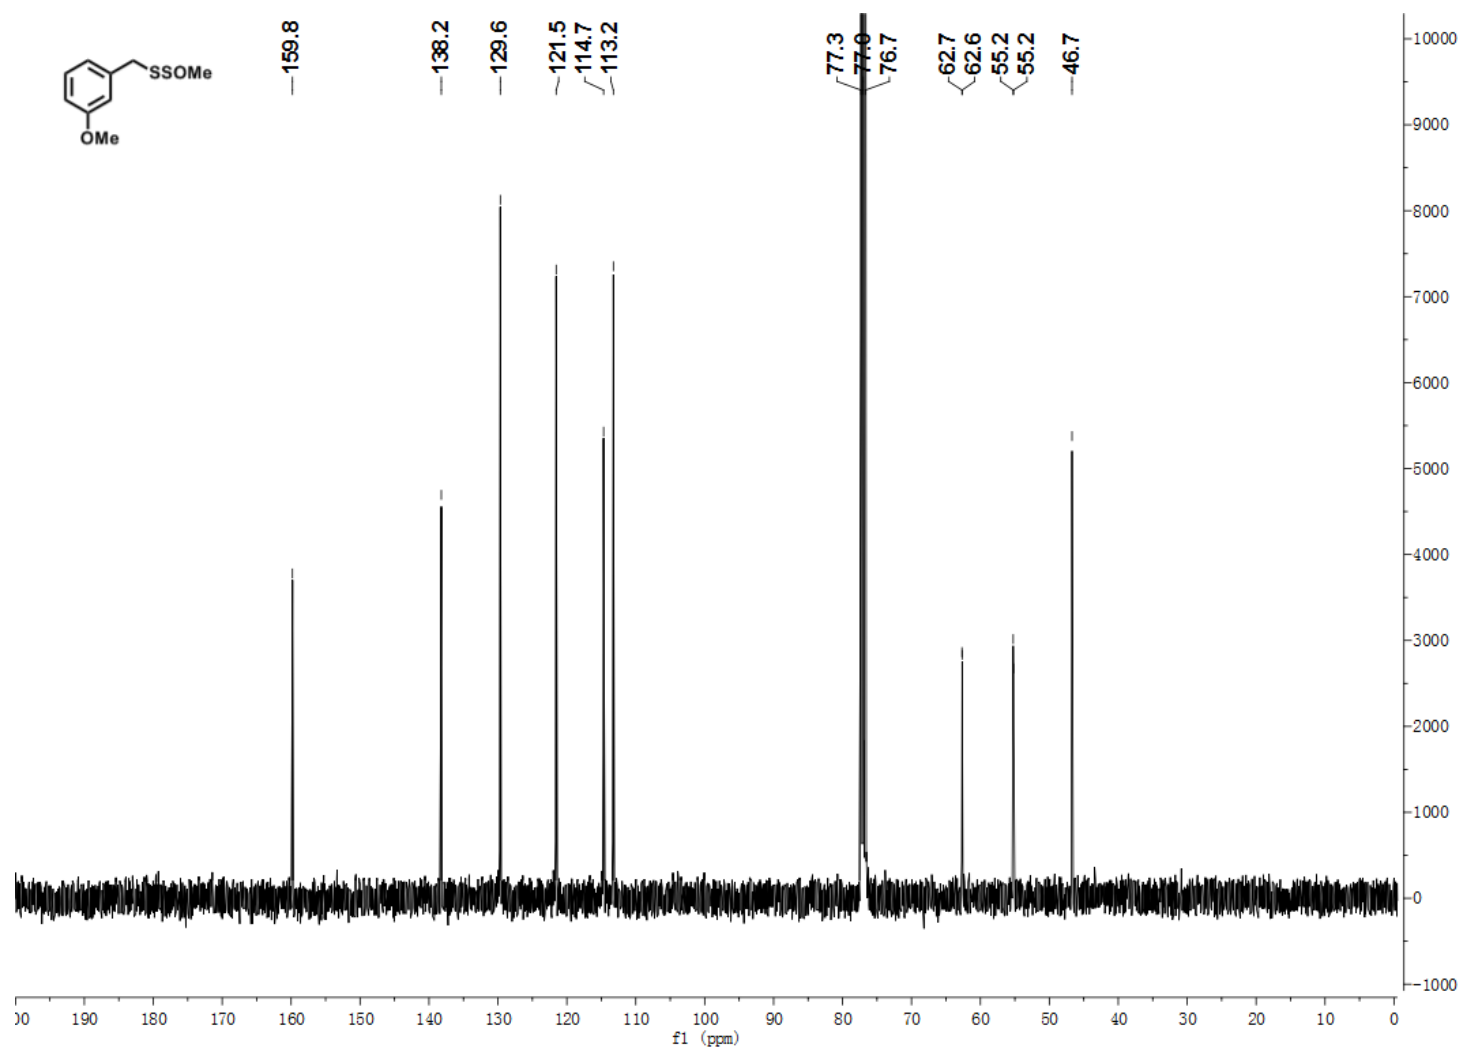

Supplementary Figure 6. <sup>13</sup>C NMR spectra for 2a.

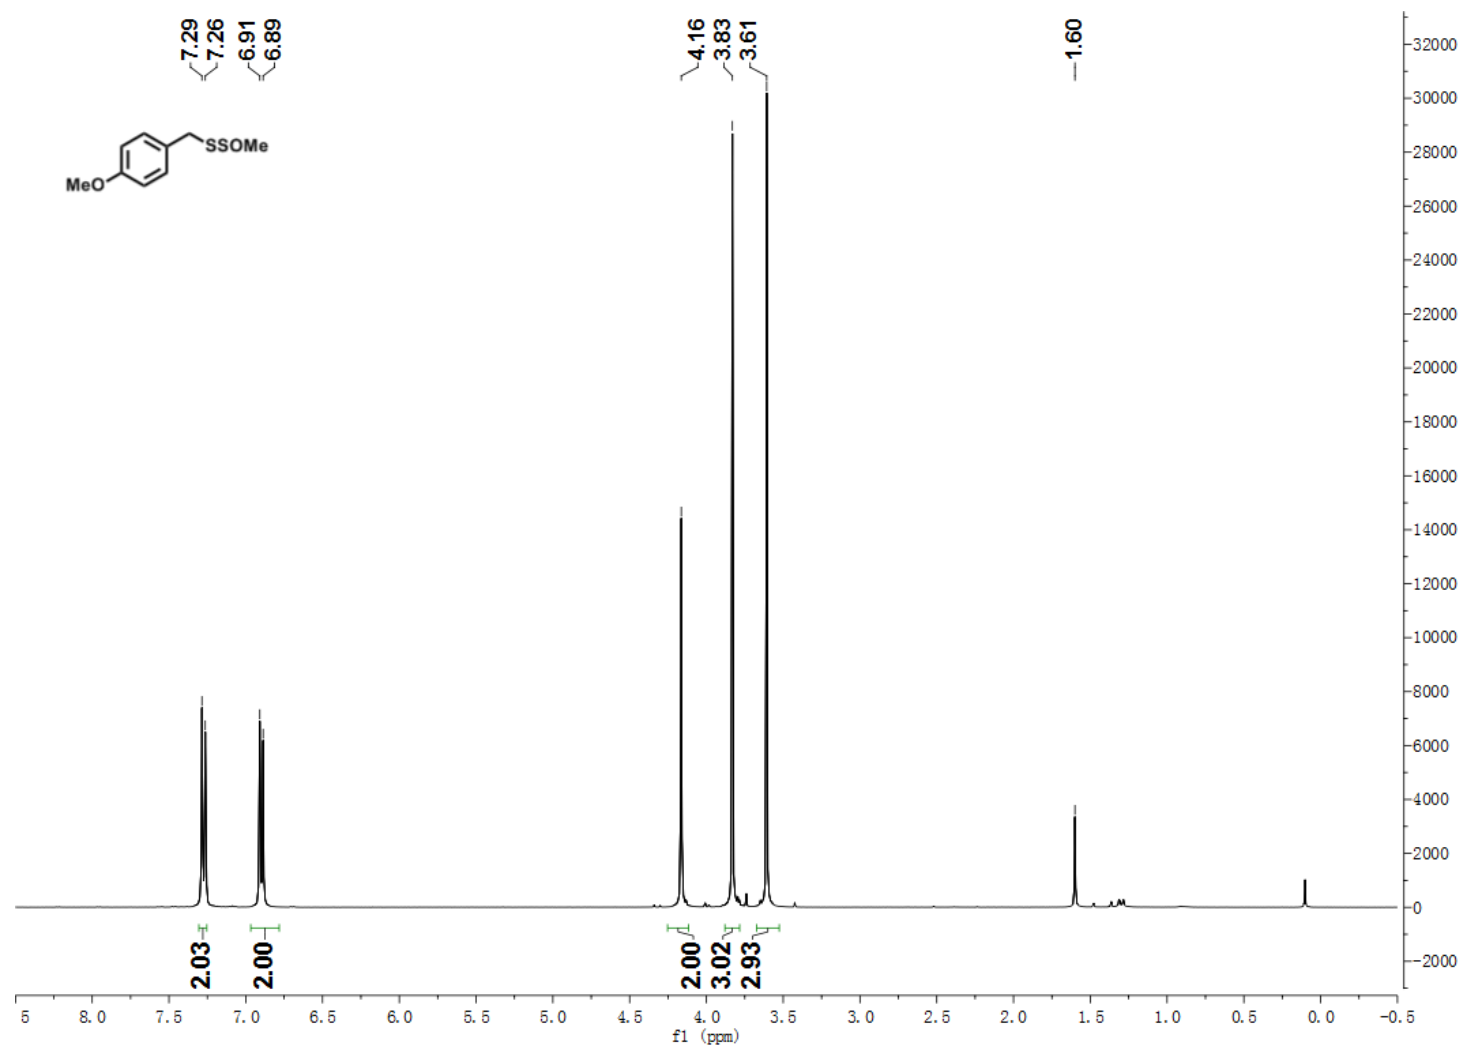

Supplementary Figure 7. <sup>1</sup>H NMR spectra for Compound 2b.

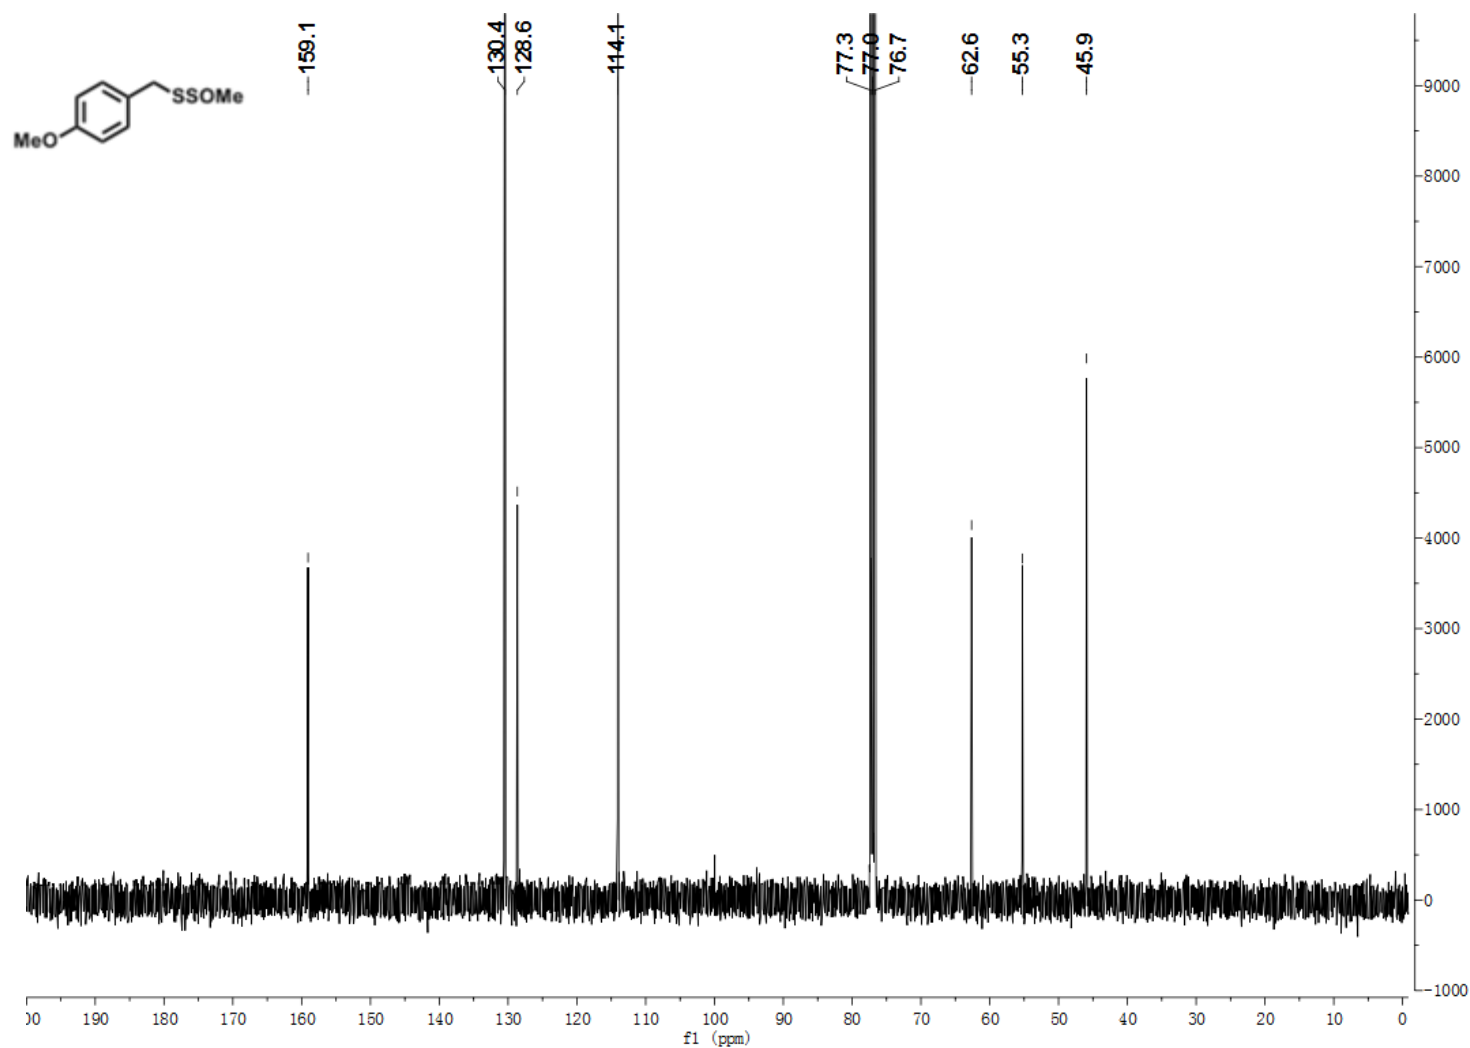

Supplementary Figure 8. <sup>13</sup>C NMR spectra for Compound 2b.

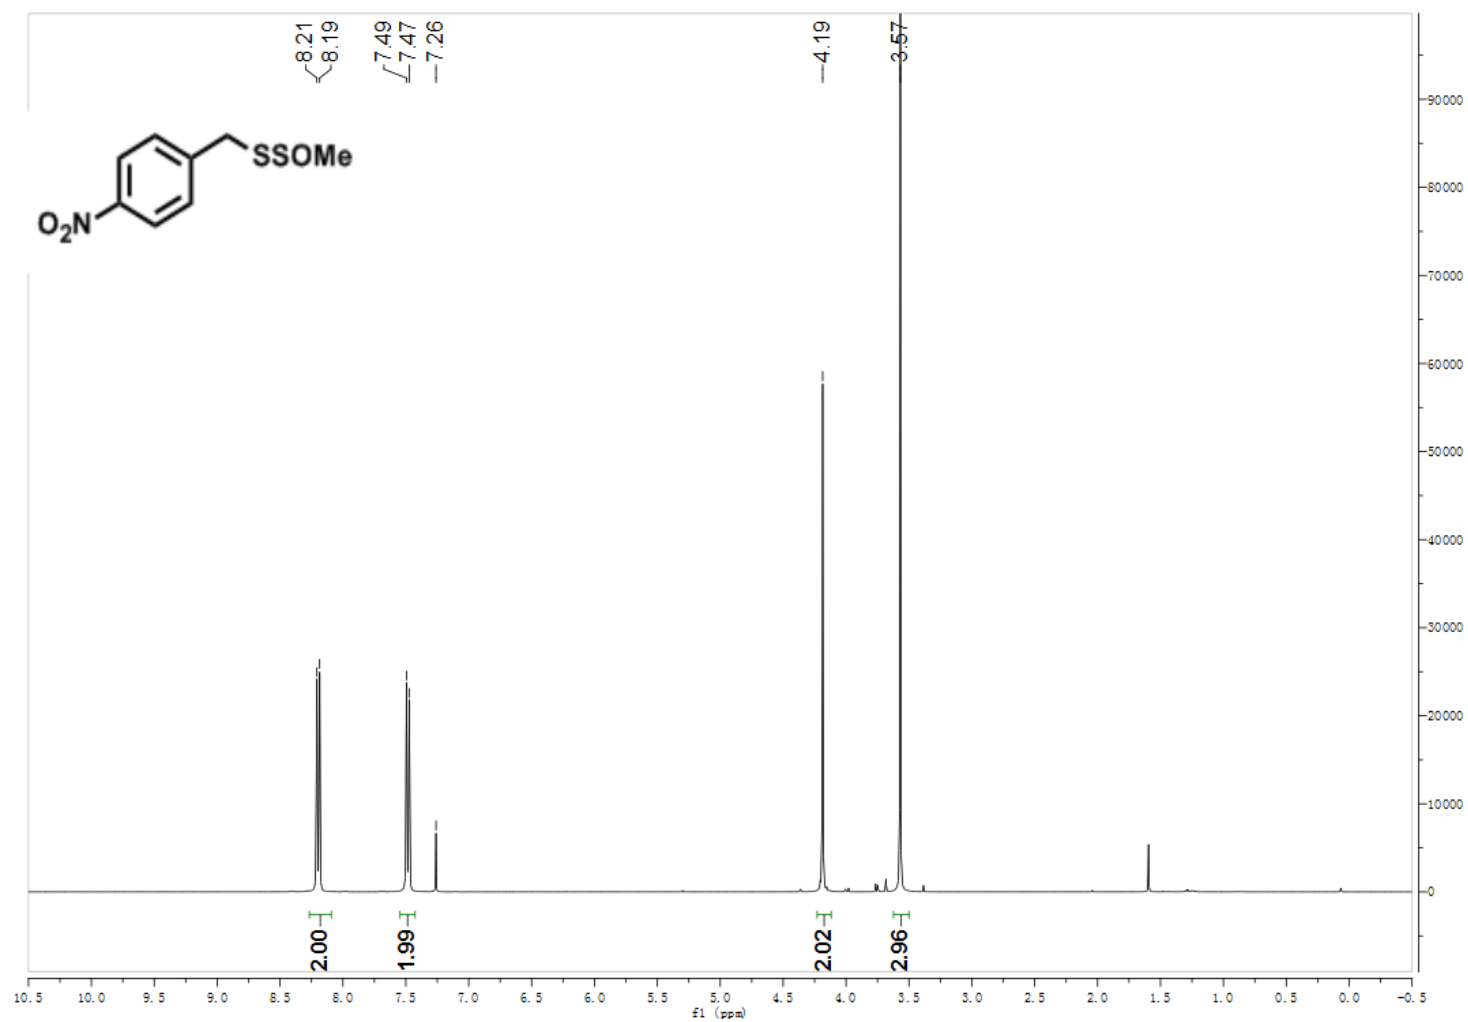

Supplementary Figure 9. <sup>1</sup>H NMR spectra for Compound 2c.

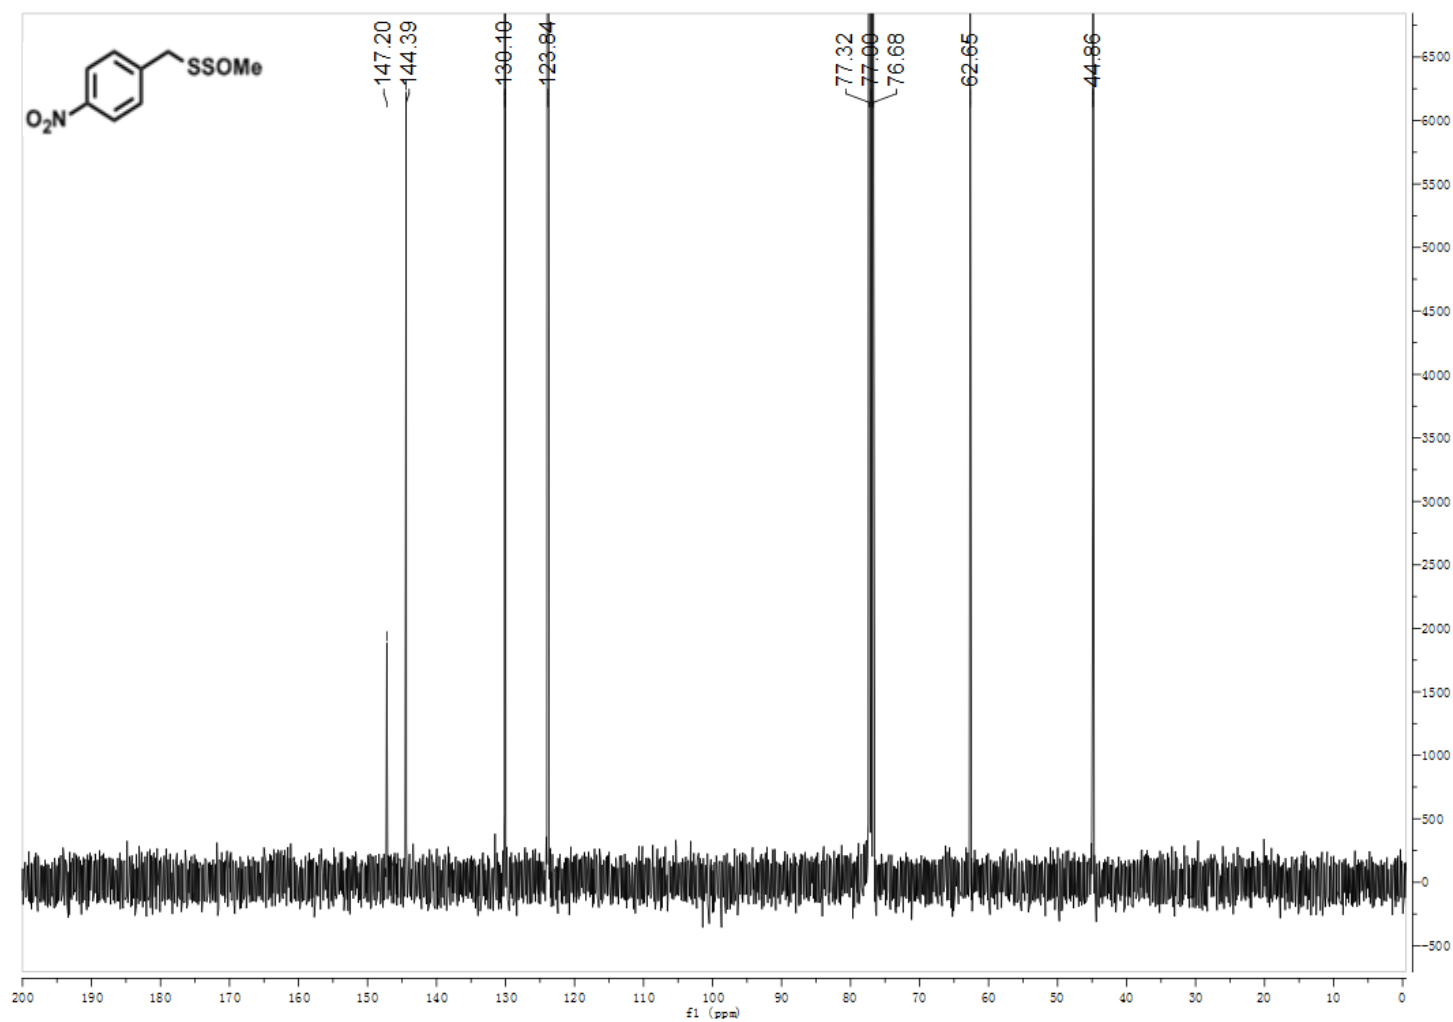

Supplementary Figure 10. <sup>13</sup>C NMR spectra for Compound 2c.

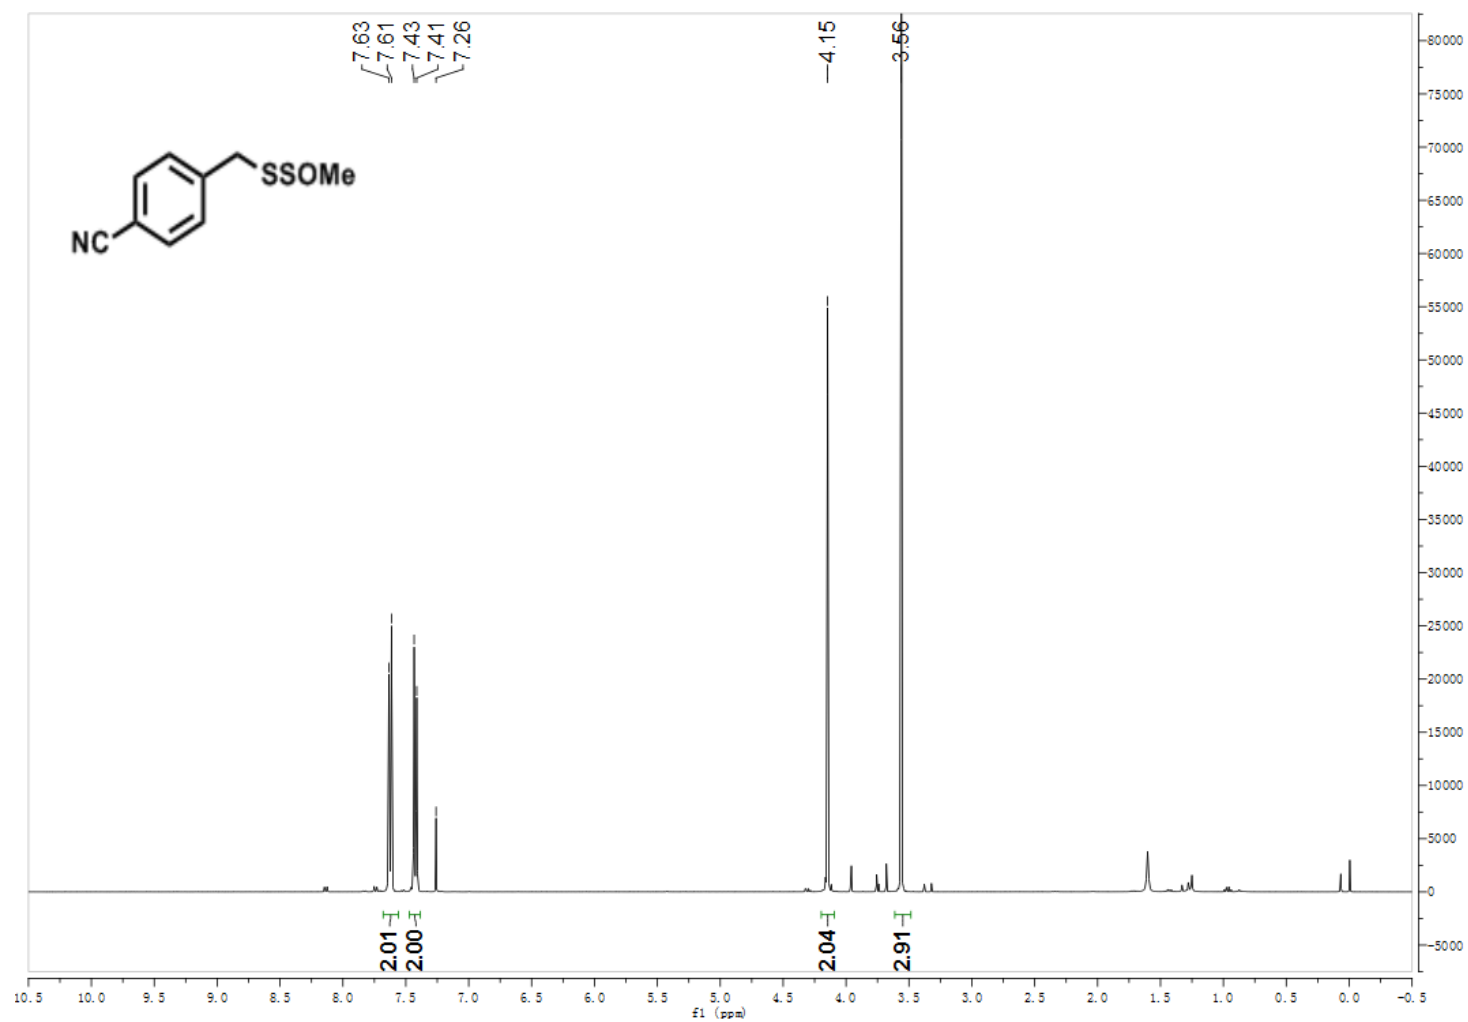

Supplementary Figure 11. <sup>1</sup>H NMR spectra for Compound 2d.

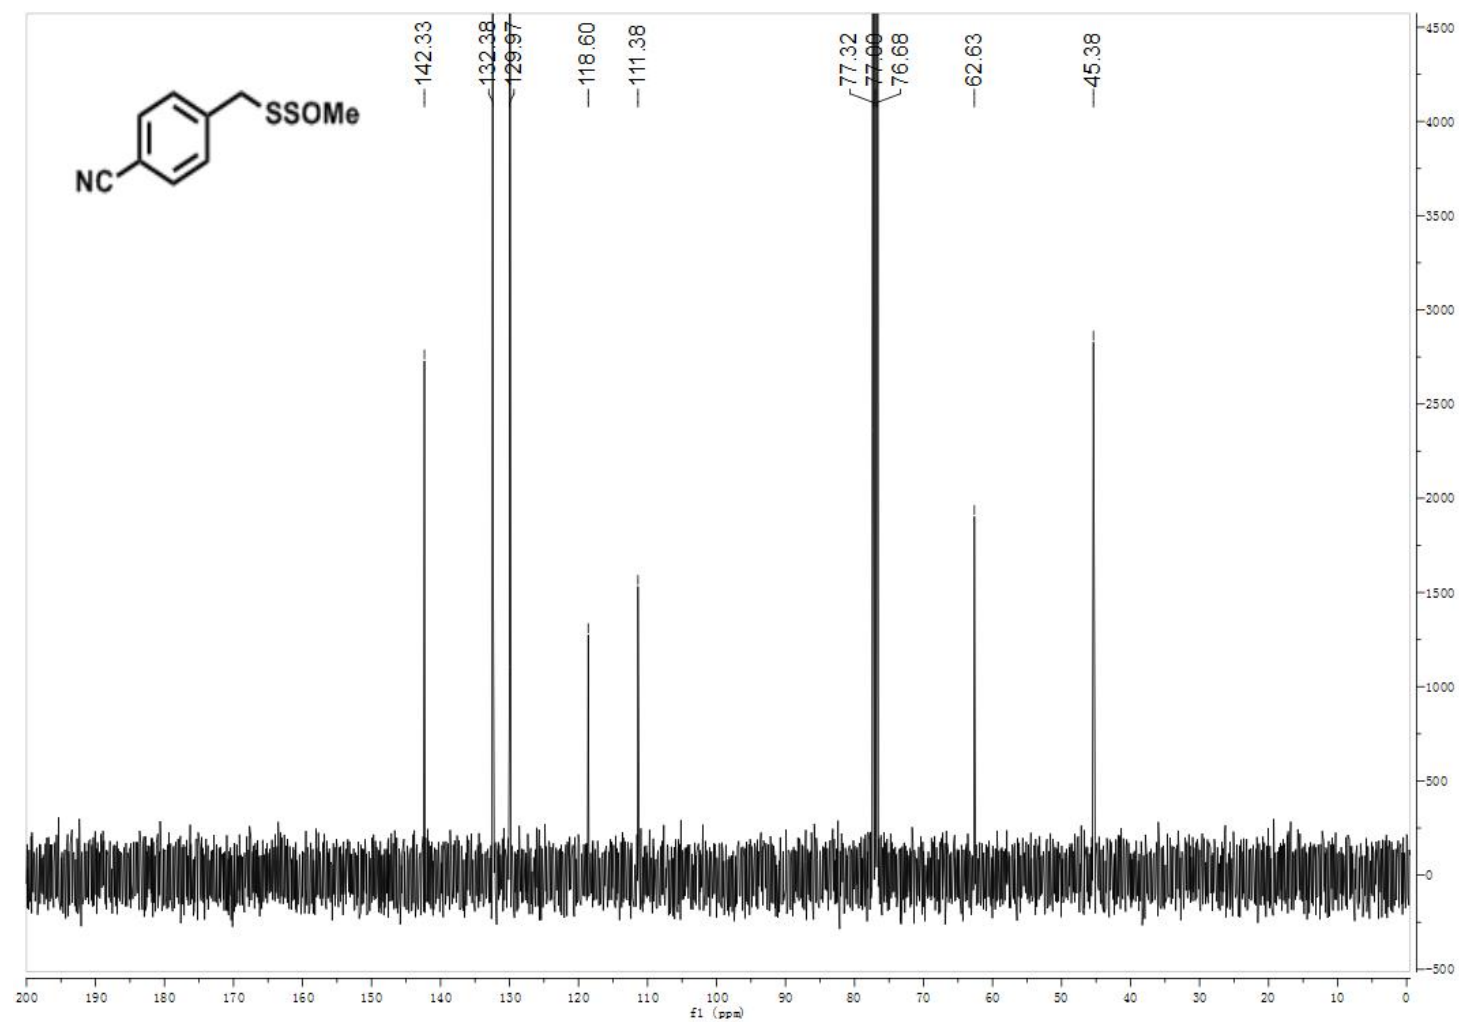

Supplementary Figure 12. <sup>13</sup>C NMR spectra for Compound 2d.

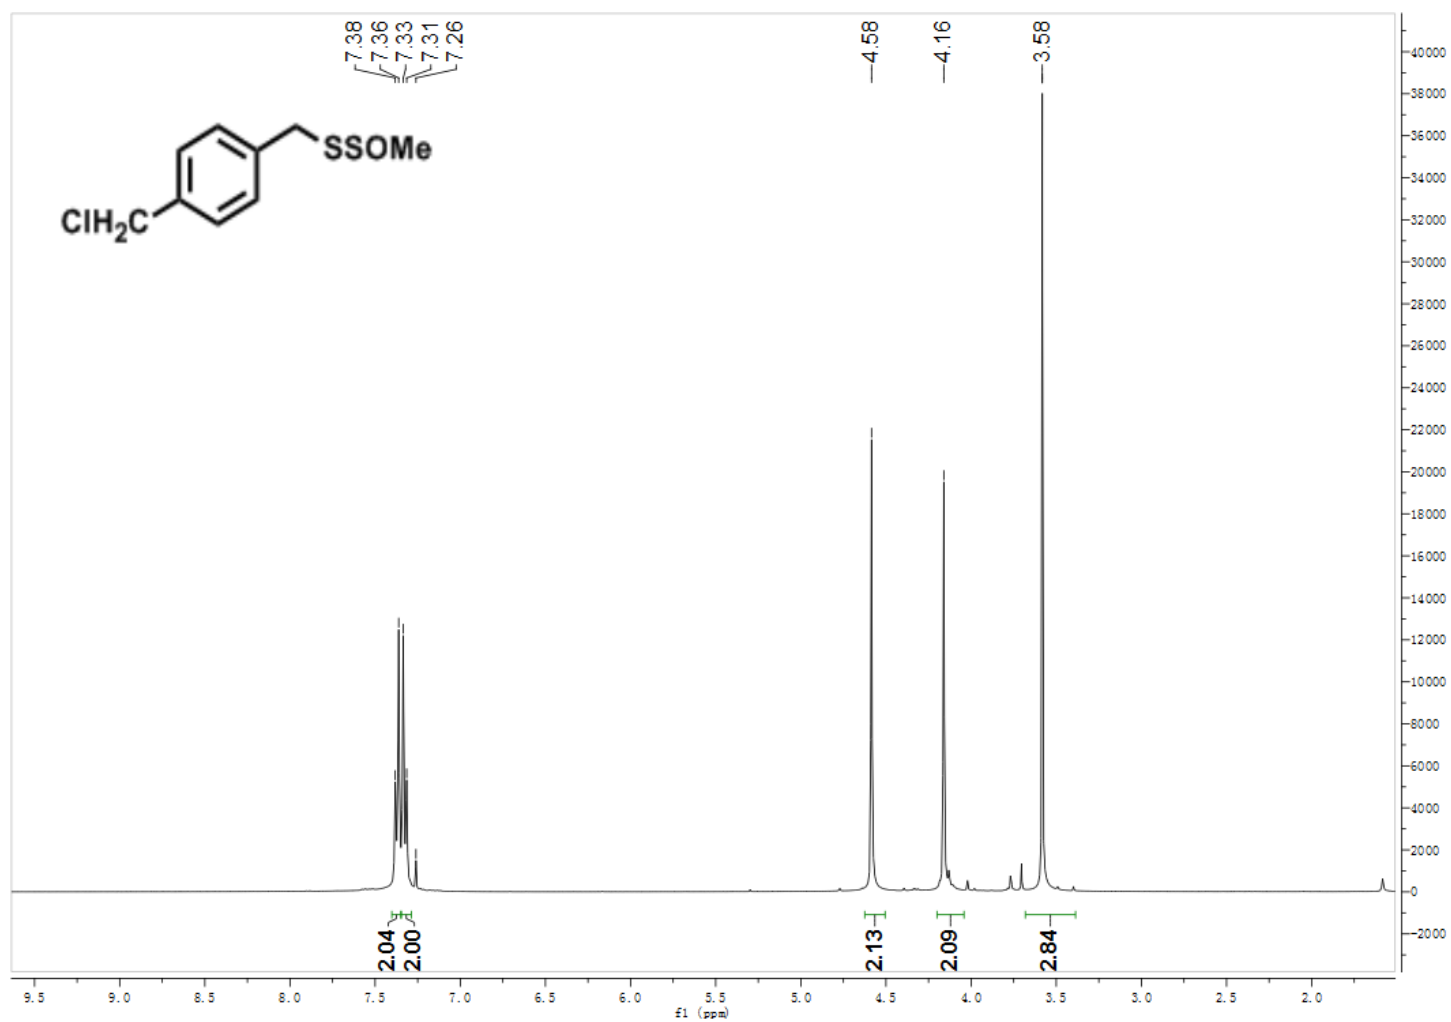

Supplementary Figure 13. <sup>1</sup>H NMR spectra for Compound 2e.

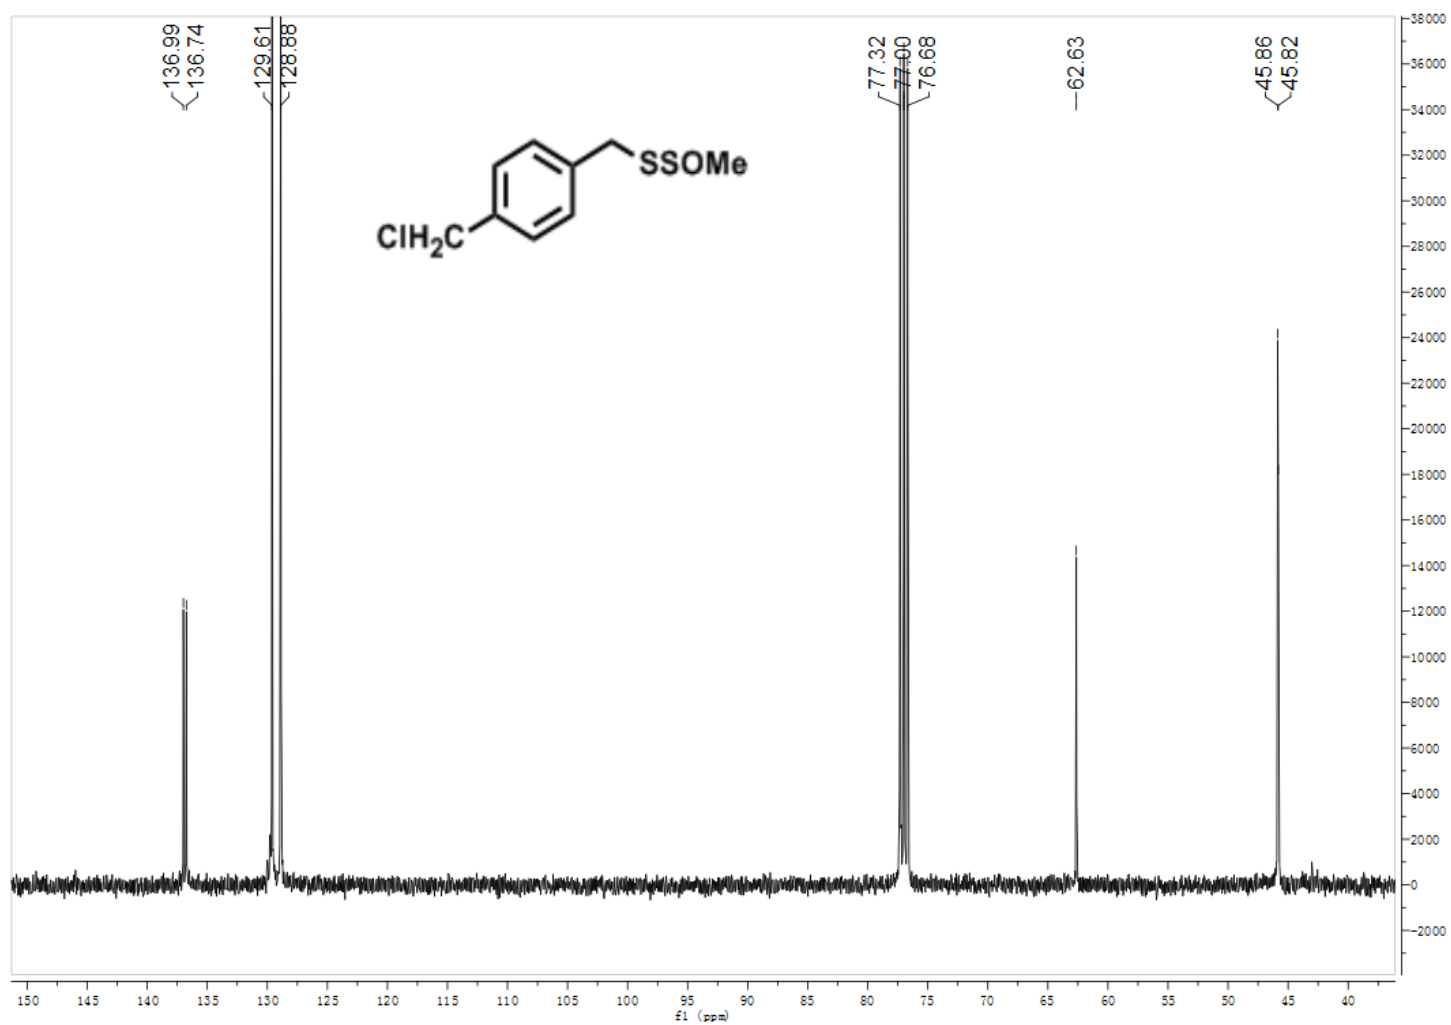

Supplementary Figure 14.  $^{13}\text{C}$  NMR spectra for Compound **2e**.

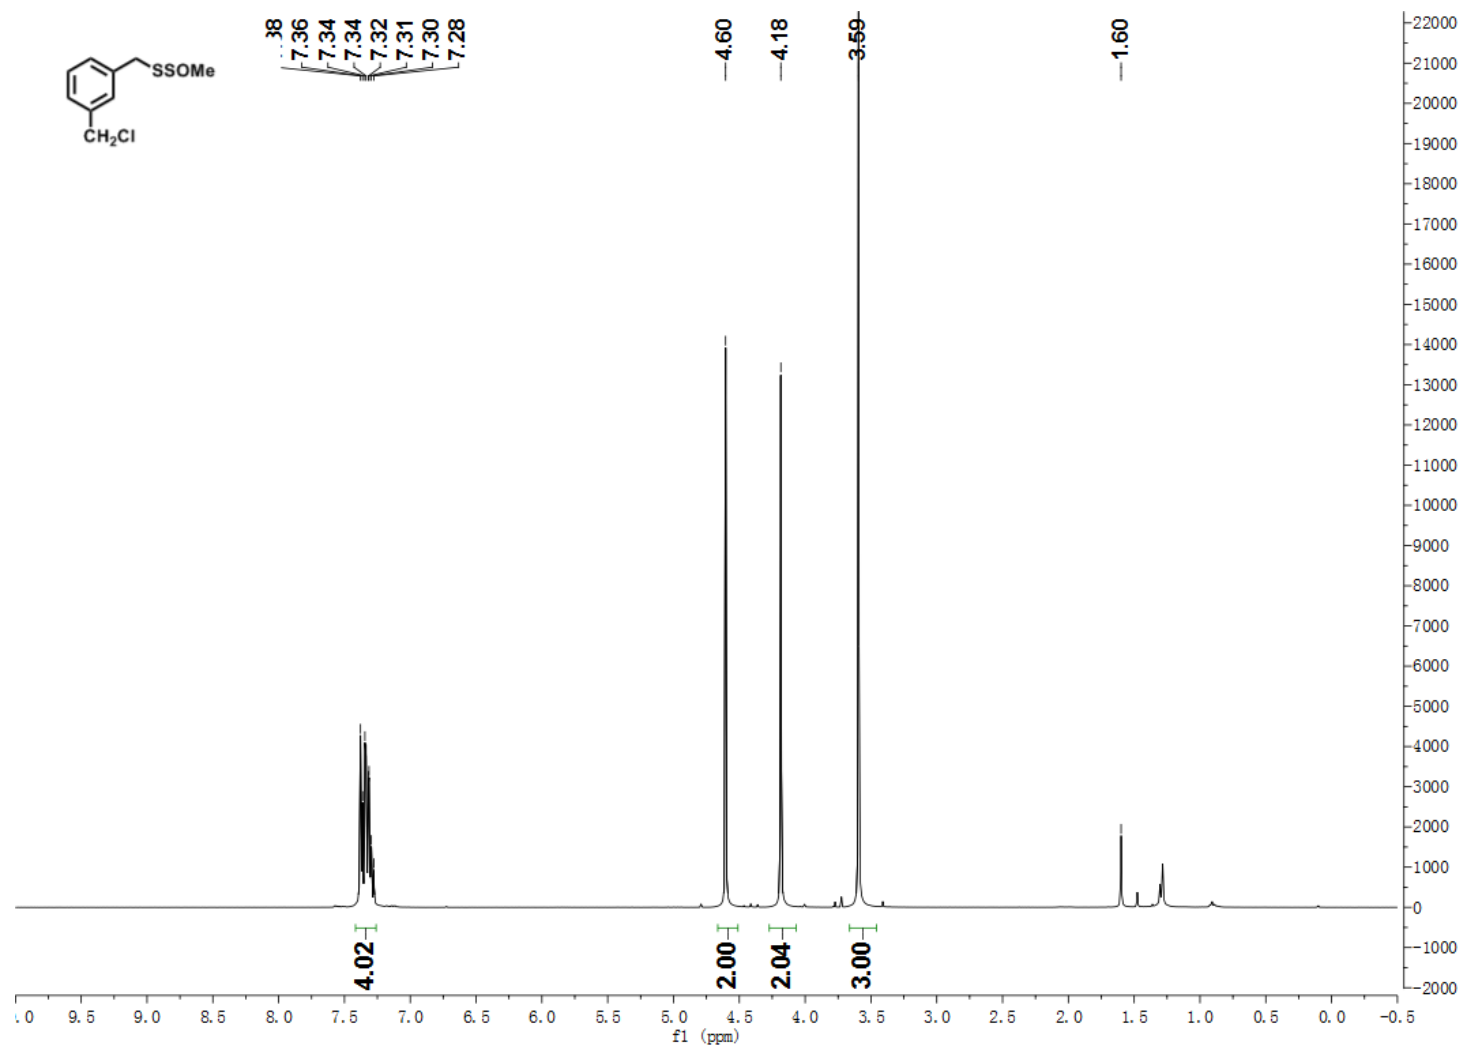

Supplementary Figure 15. <sup>1</sup>H NMR spectra for Compound 2f.

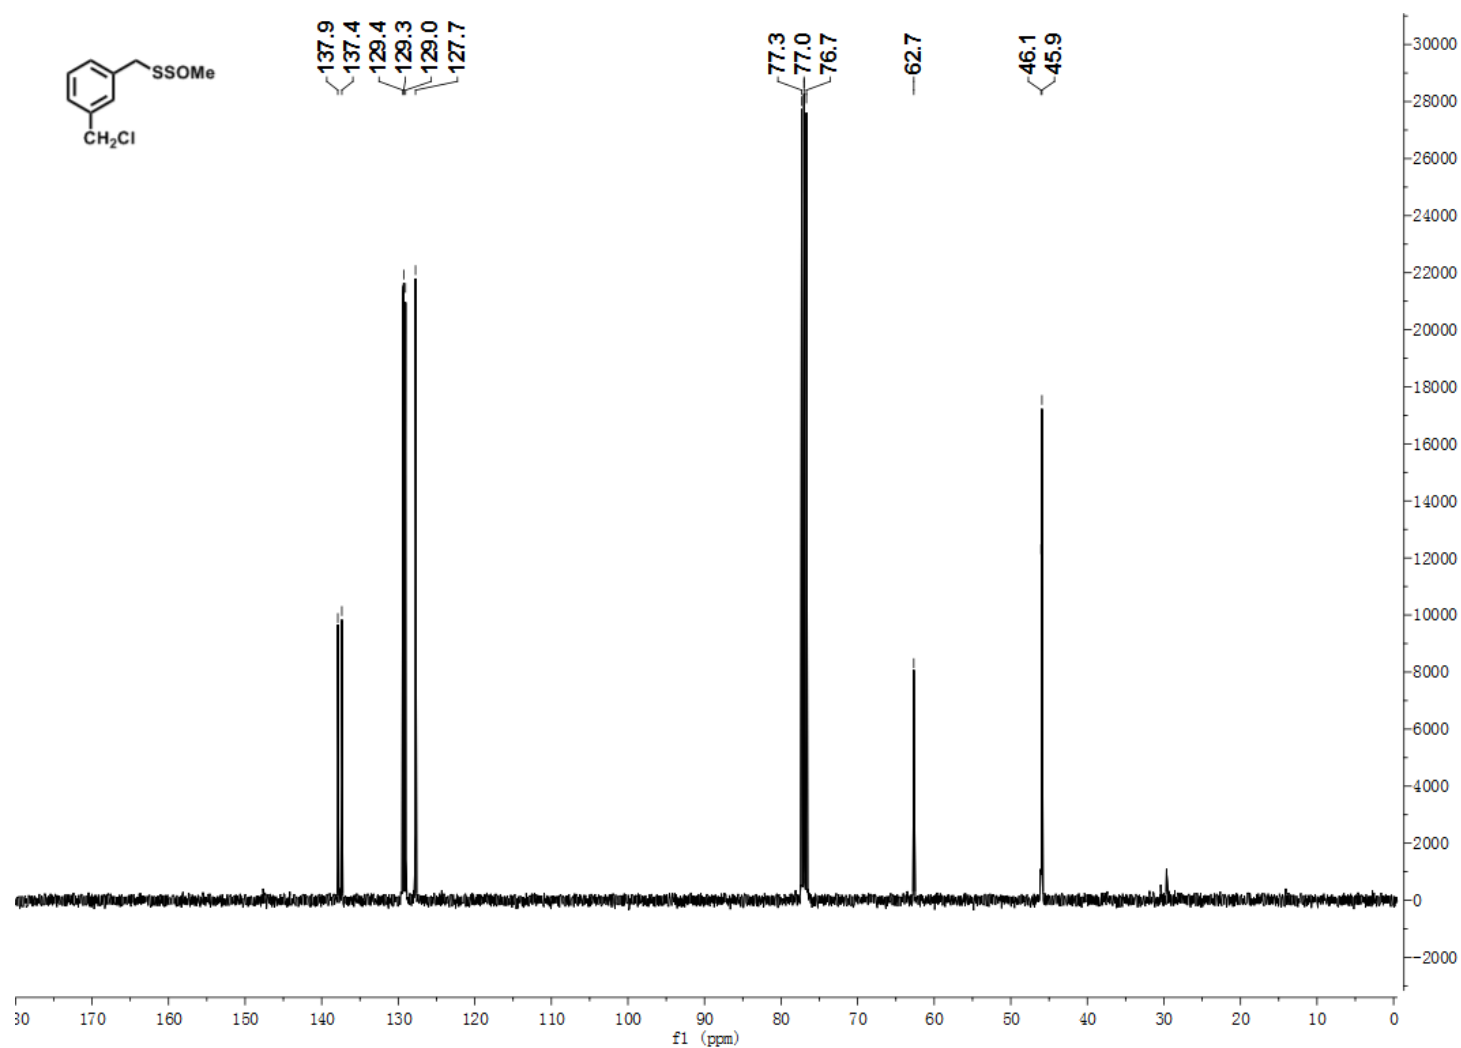

Supplementary Figure 16. <sup>13</sup>C NMR spectra for Compound 2f.

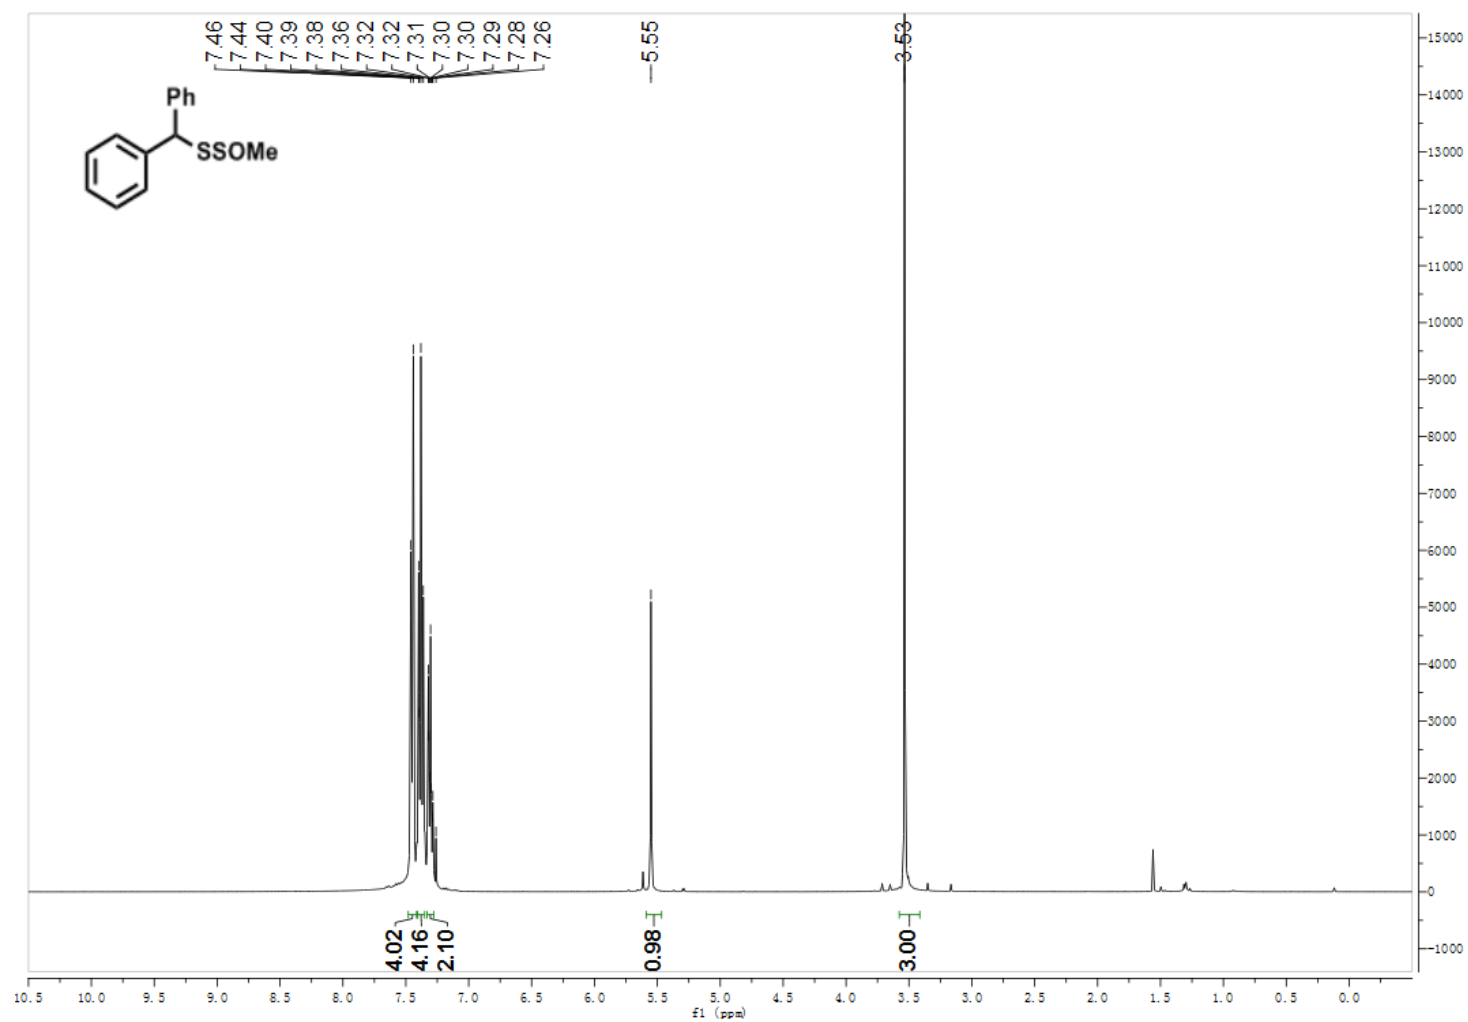

Supplementary Figure 17. <sup>1</sup>H NMR spectra for Compound **2g**.

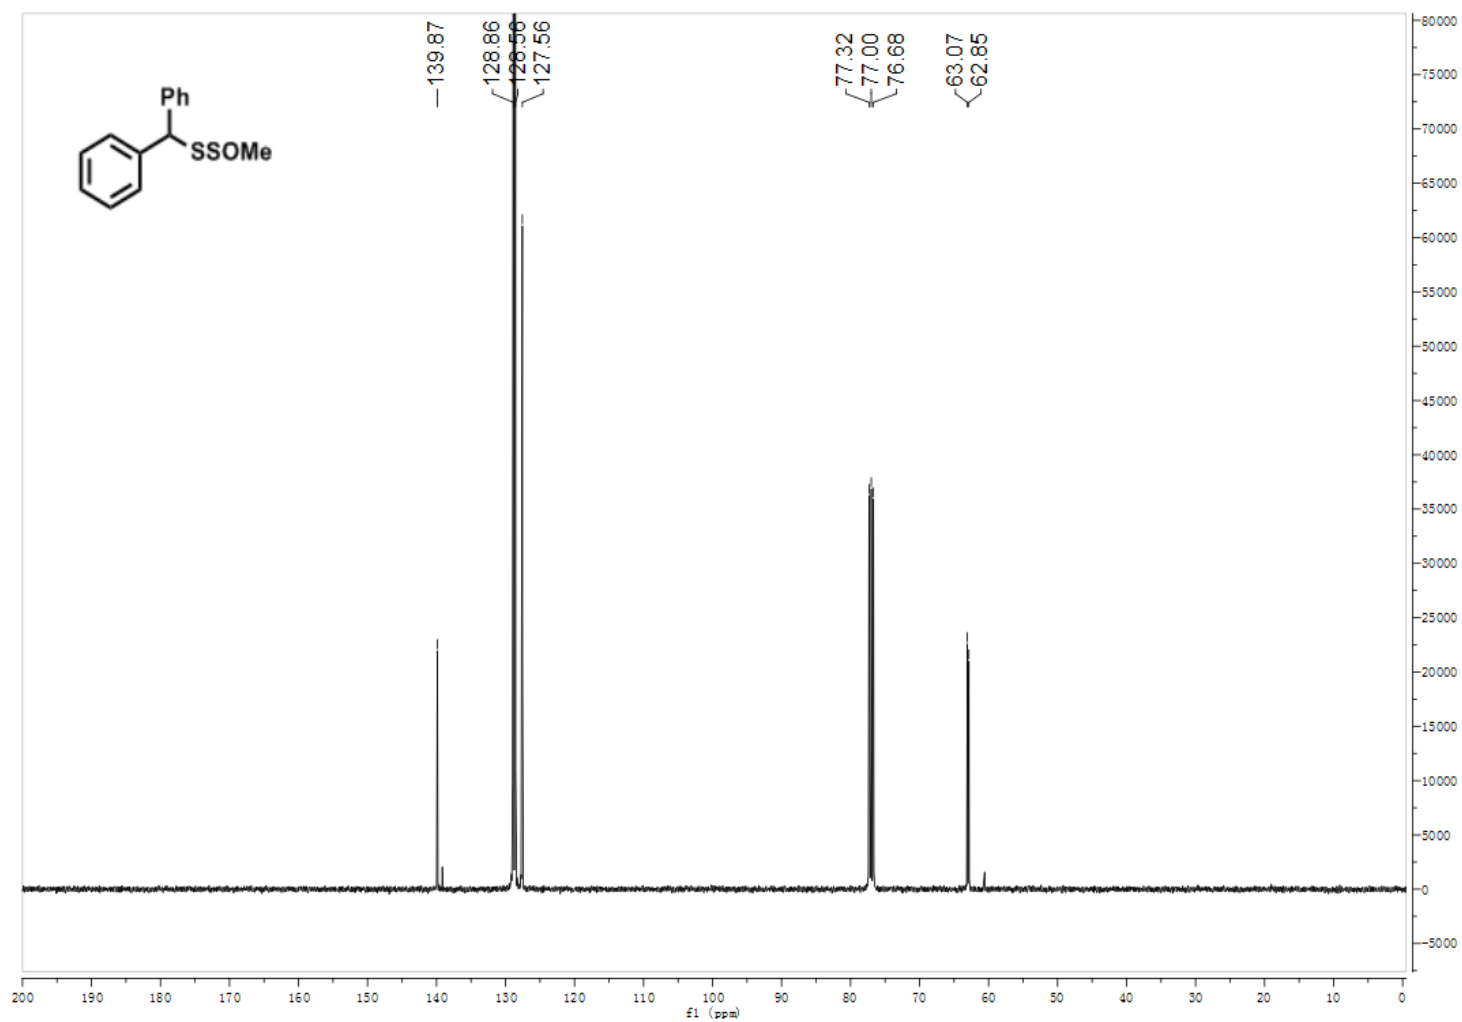

**Supplementary Figure 18.** <sup>13</sup>C NMR spectra for Compound **2g**.

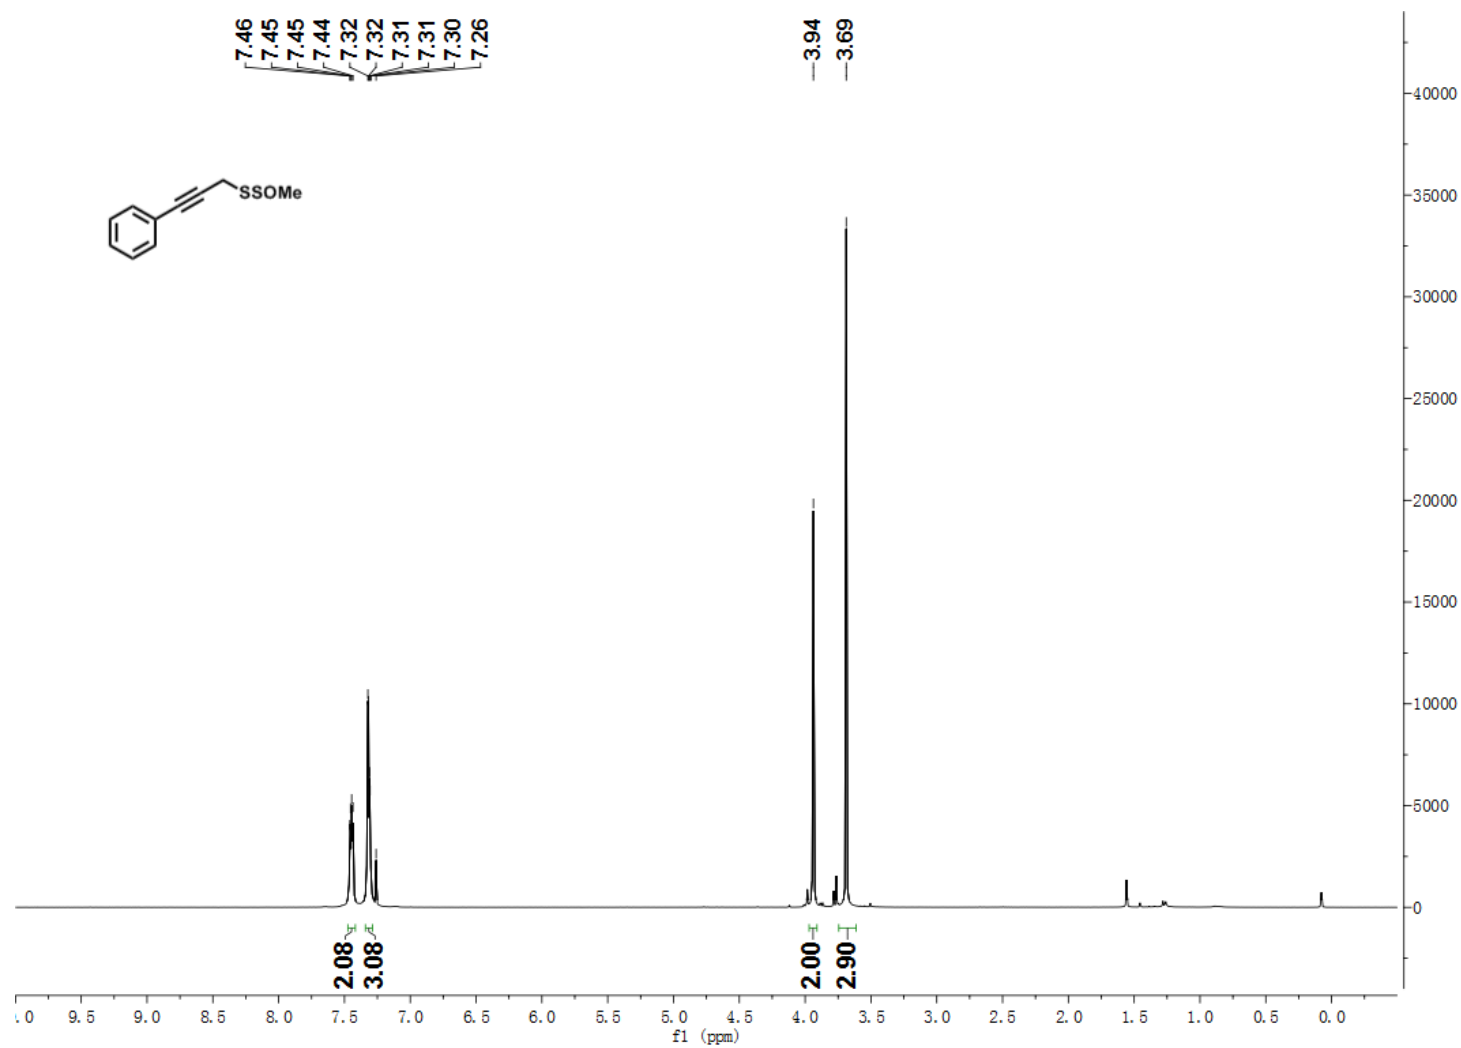

**Supplementary Figure 19.** <sup>1</sup>H NMR spectra for Compound **2h**.

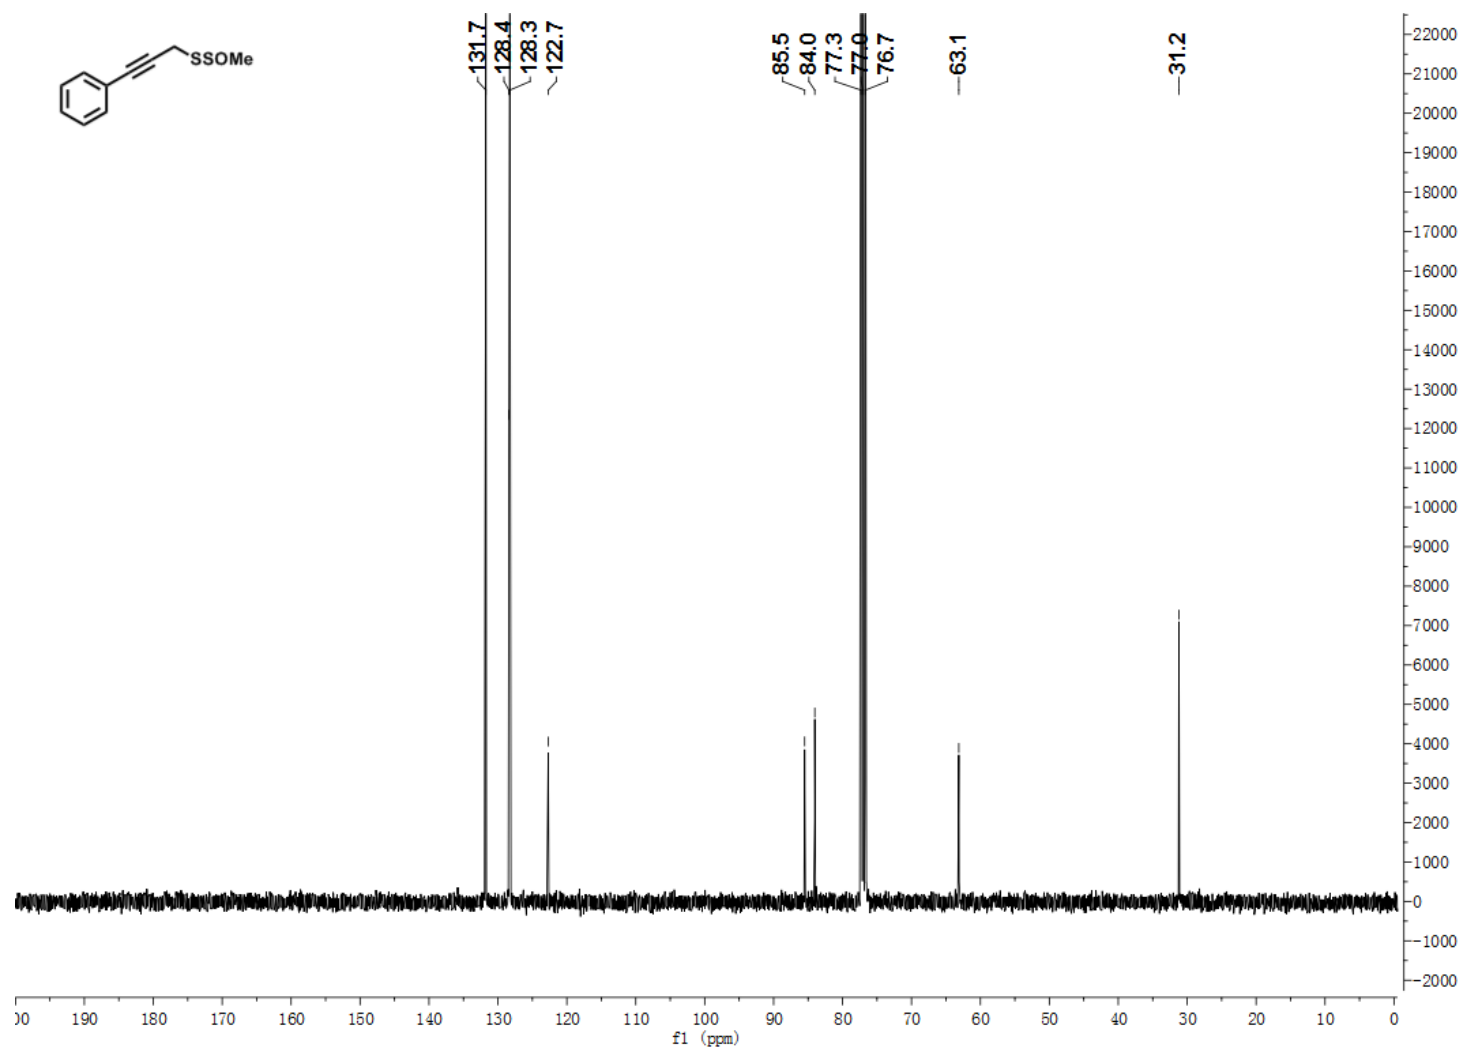

Supplementary Figure 20. <sup>13</sup>C NMR spectra for Compound 2h.

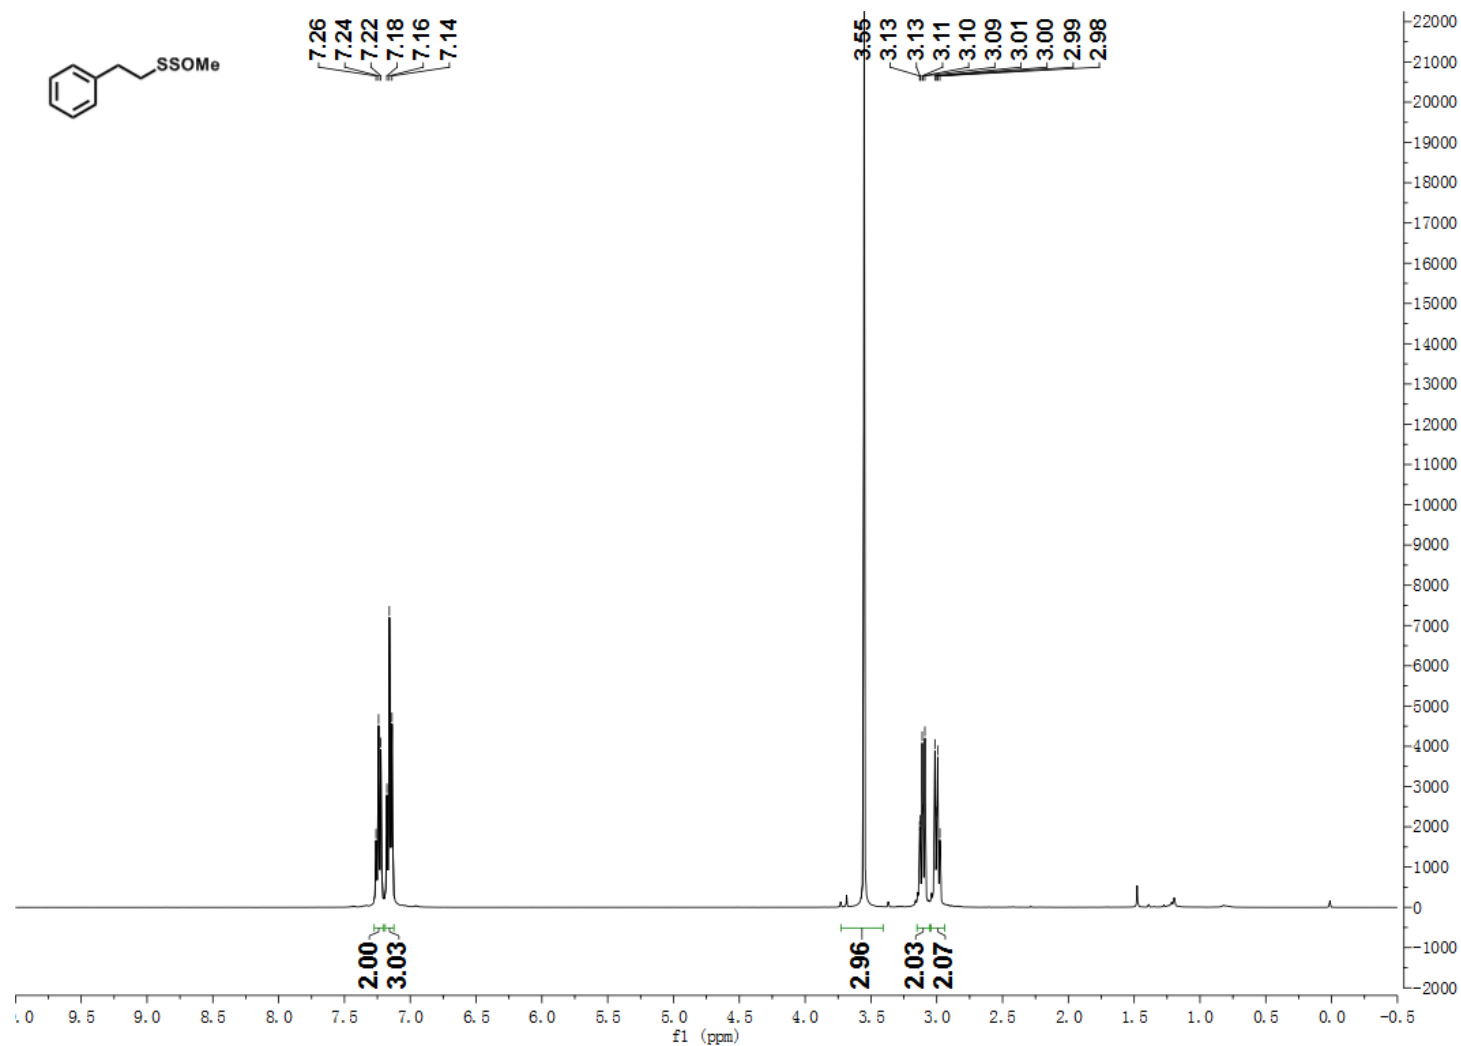

**Supplementary Figure 21.** <sup>1</sup>H NMR spectra for Compound 2i.

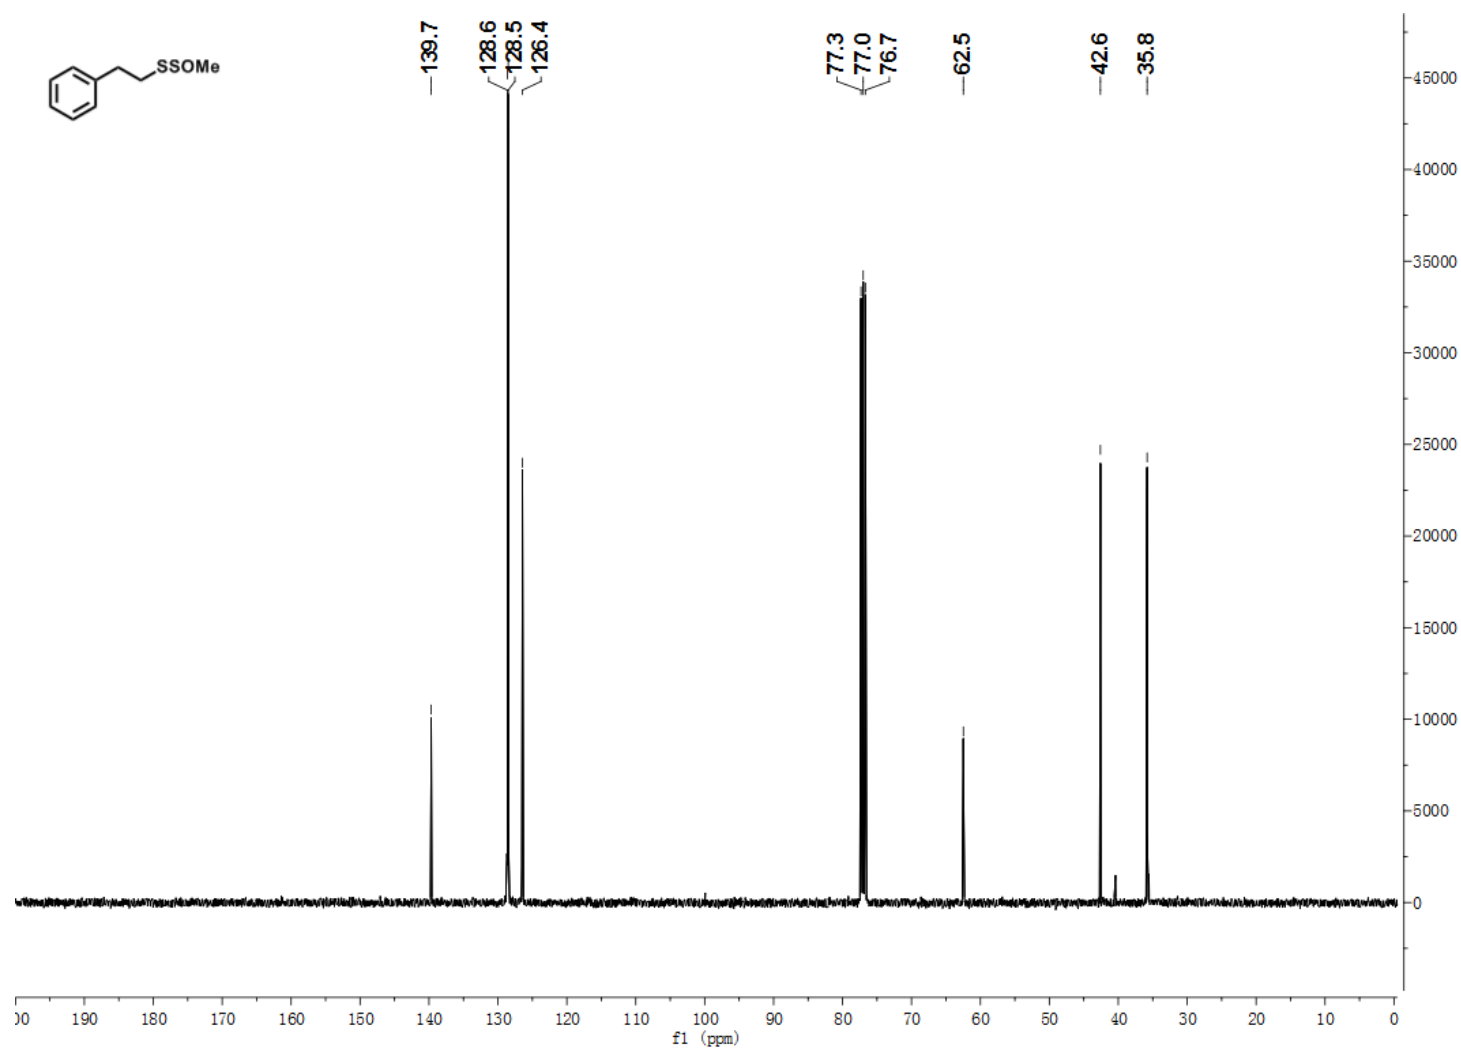

Supplementary Figure 22.  $^{13}\text{C}$  NMR spectra for Compound 2i.

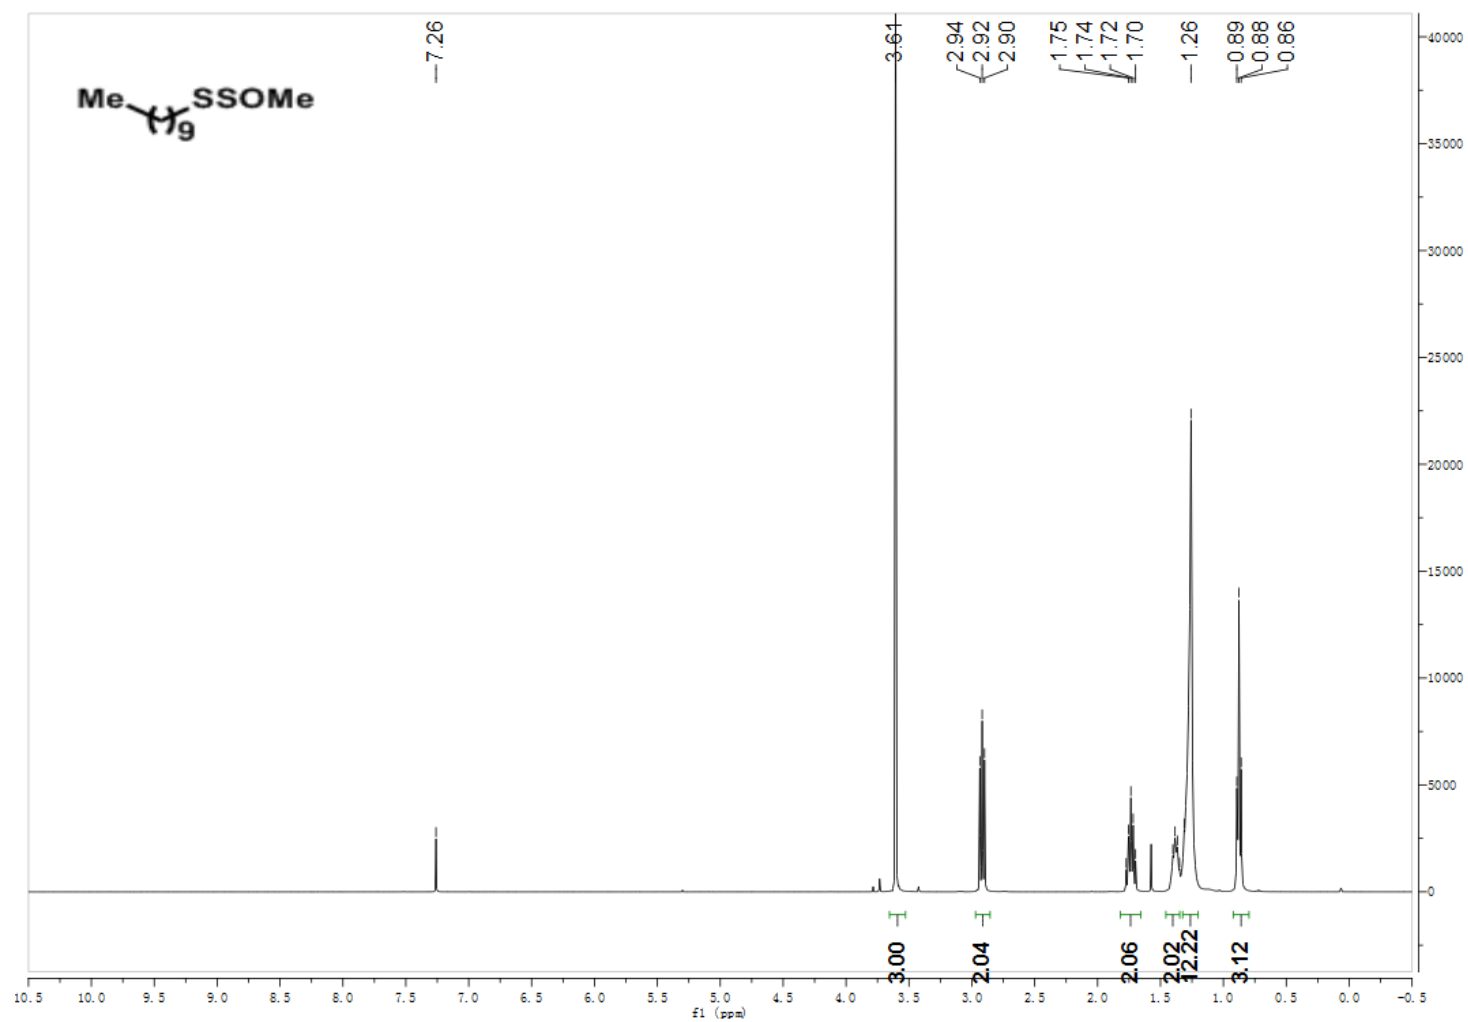

Supplementary Figure 23.  $^1\text{H}$  NMR spectra for Compound 2j.

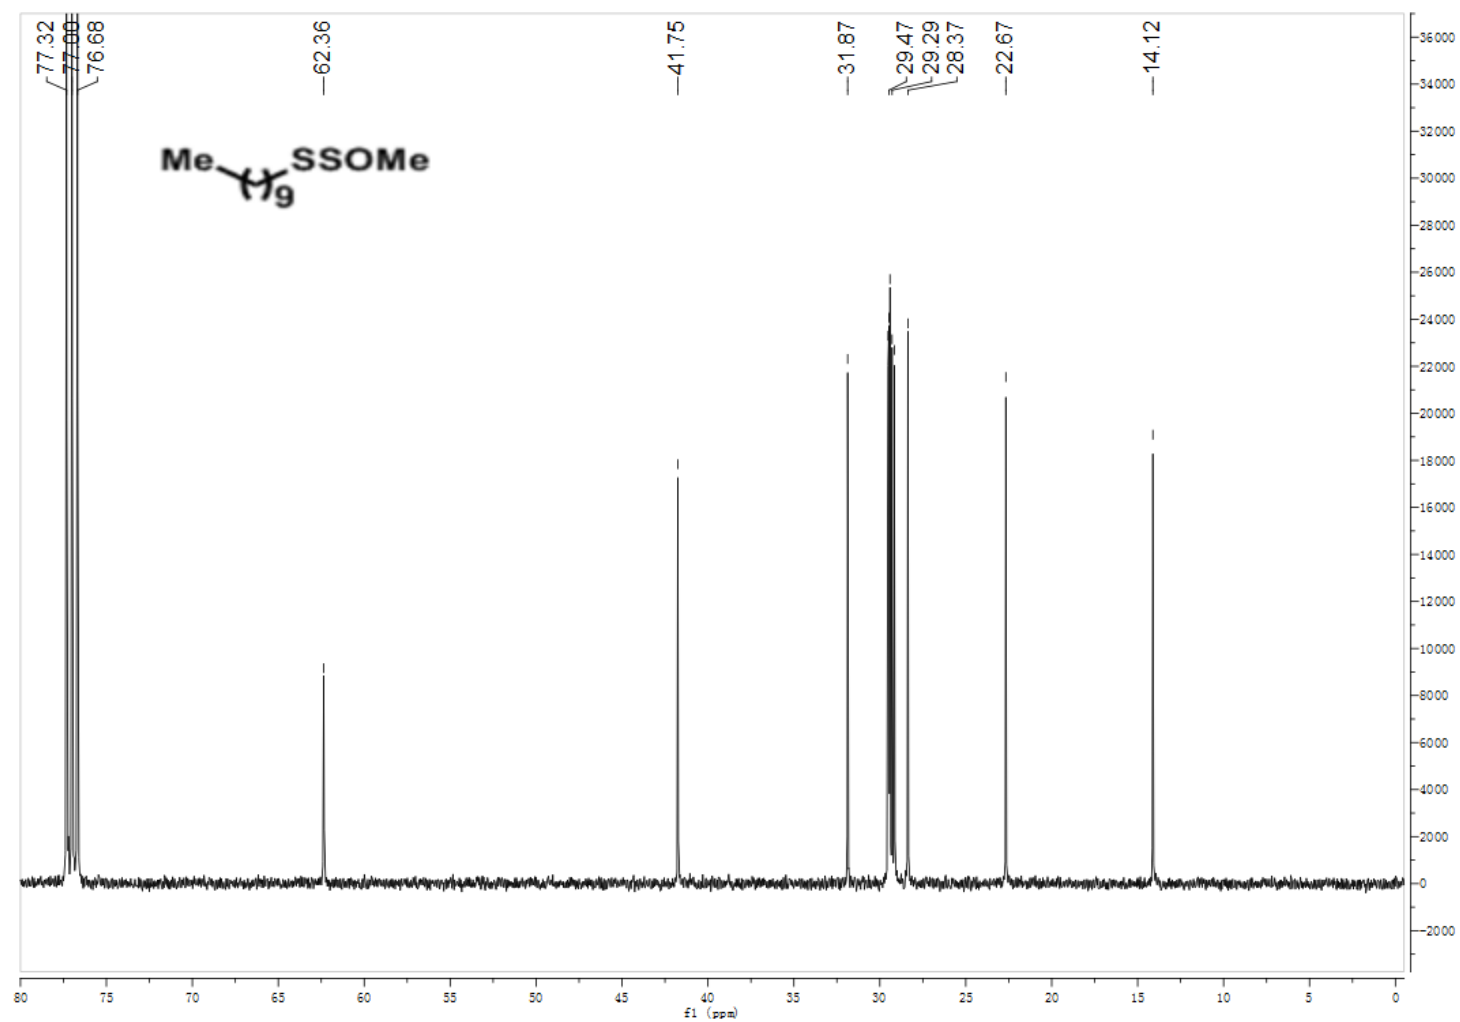

Supplementary Figure 24.  $^{13}\text{C}$  NMR spectra for Compound 2j.

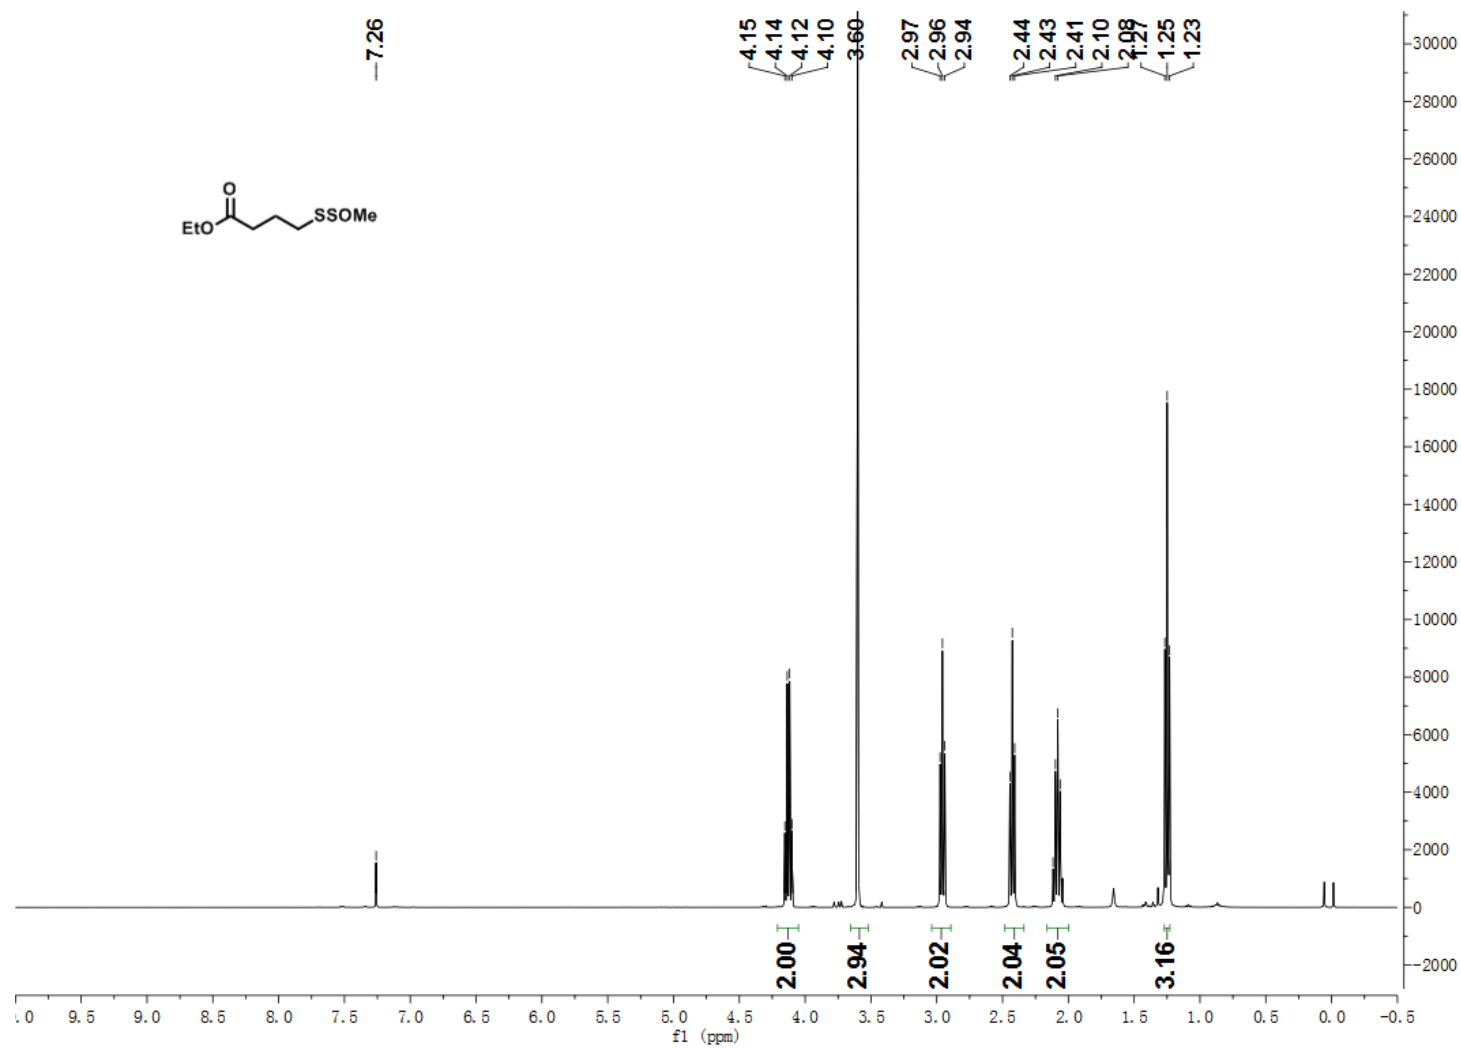

Supplementary Figure 25.  $^1\text{H}$  NMR spectra for Compound 2k.

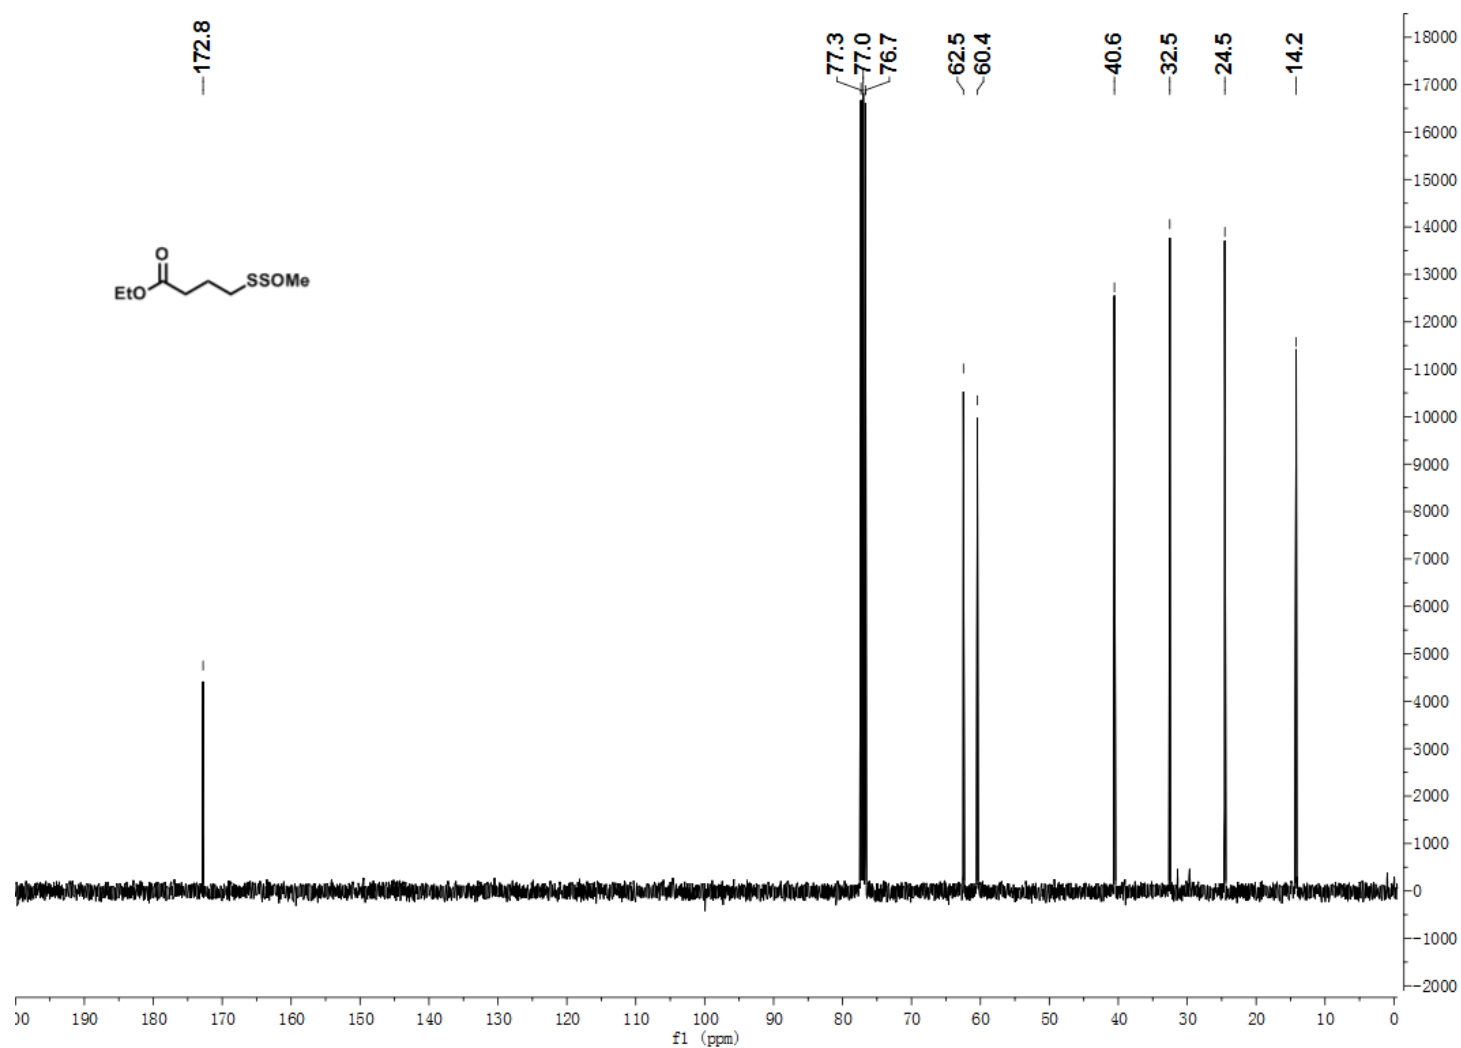

Supplementary Figure 26. <sup>13</sup>C NMR spectra for Compound 2k.

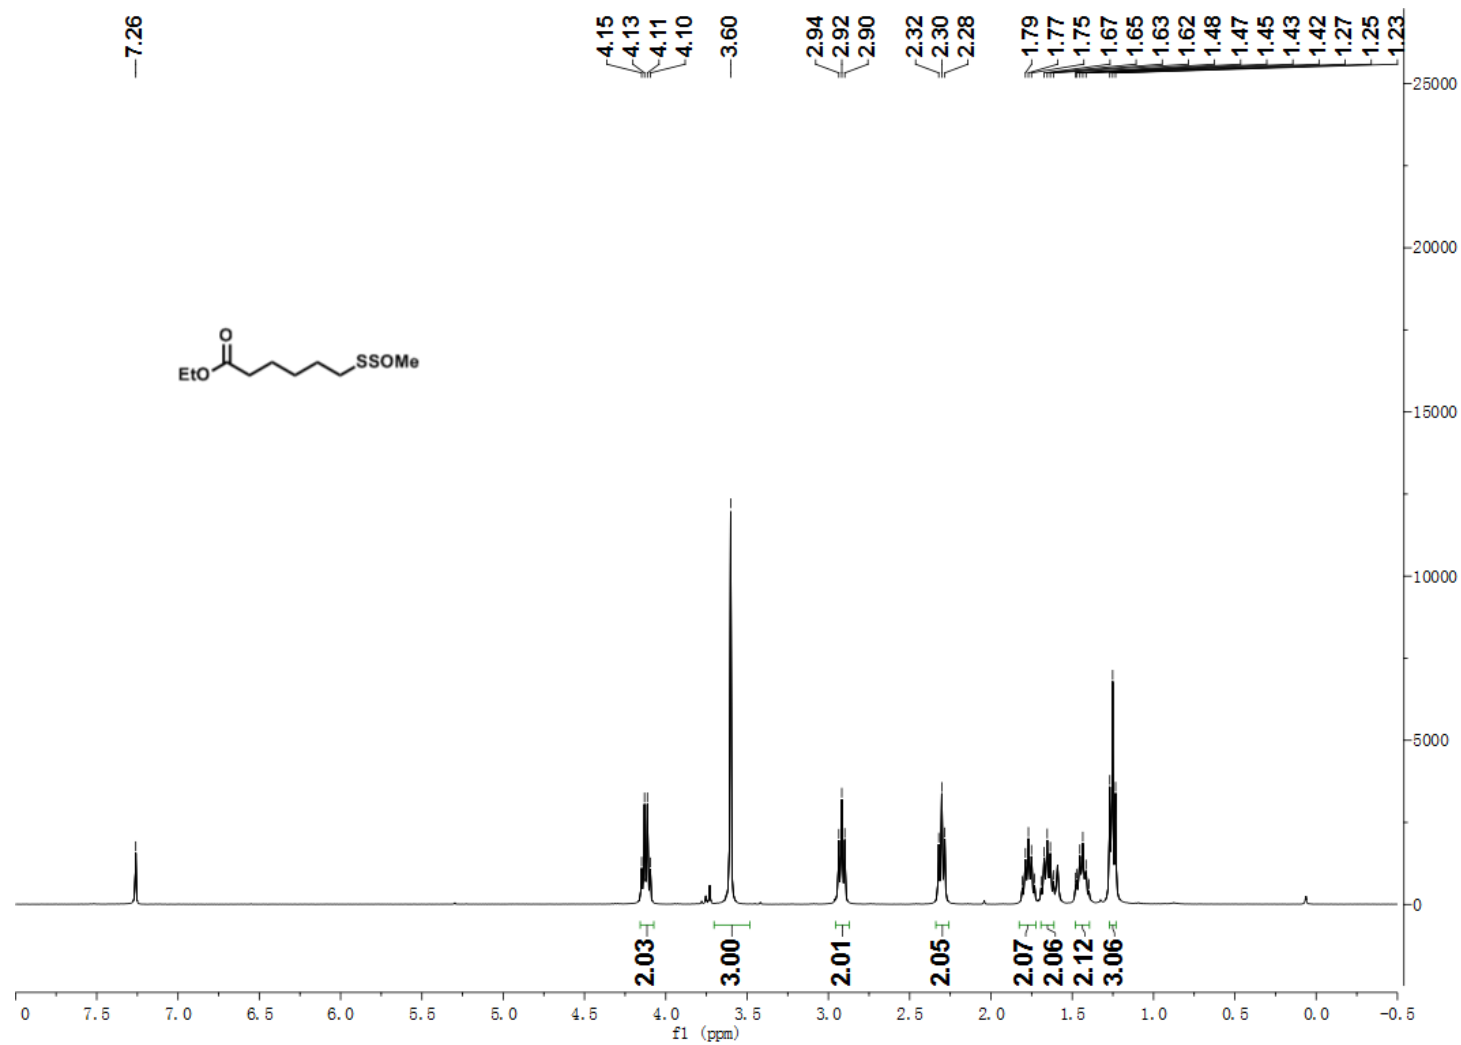

Supplementary Figure 27. <sup>1</sup>H NMR spectra for Compound 2l.

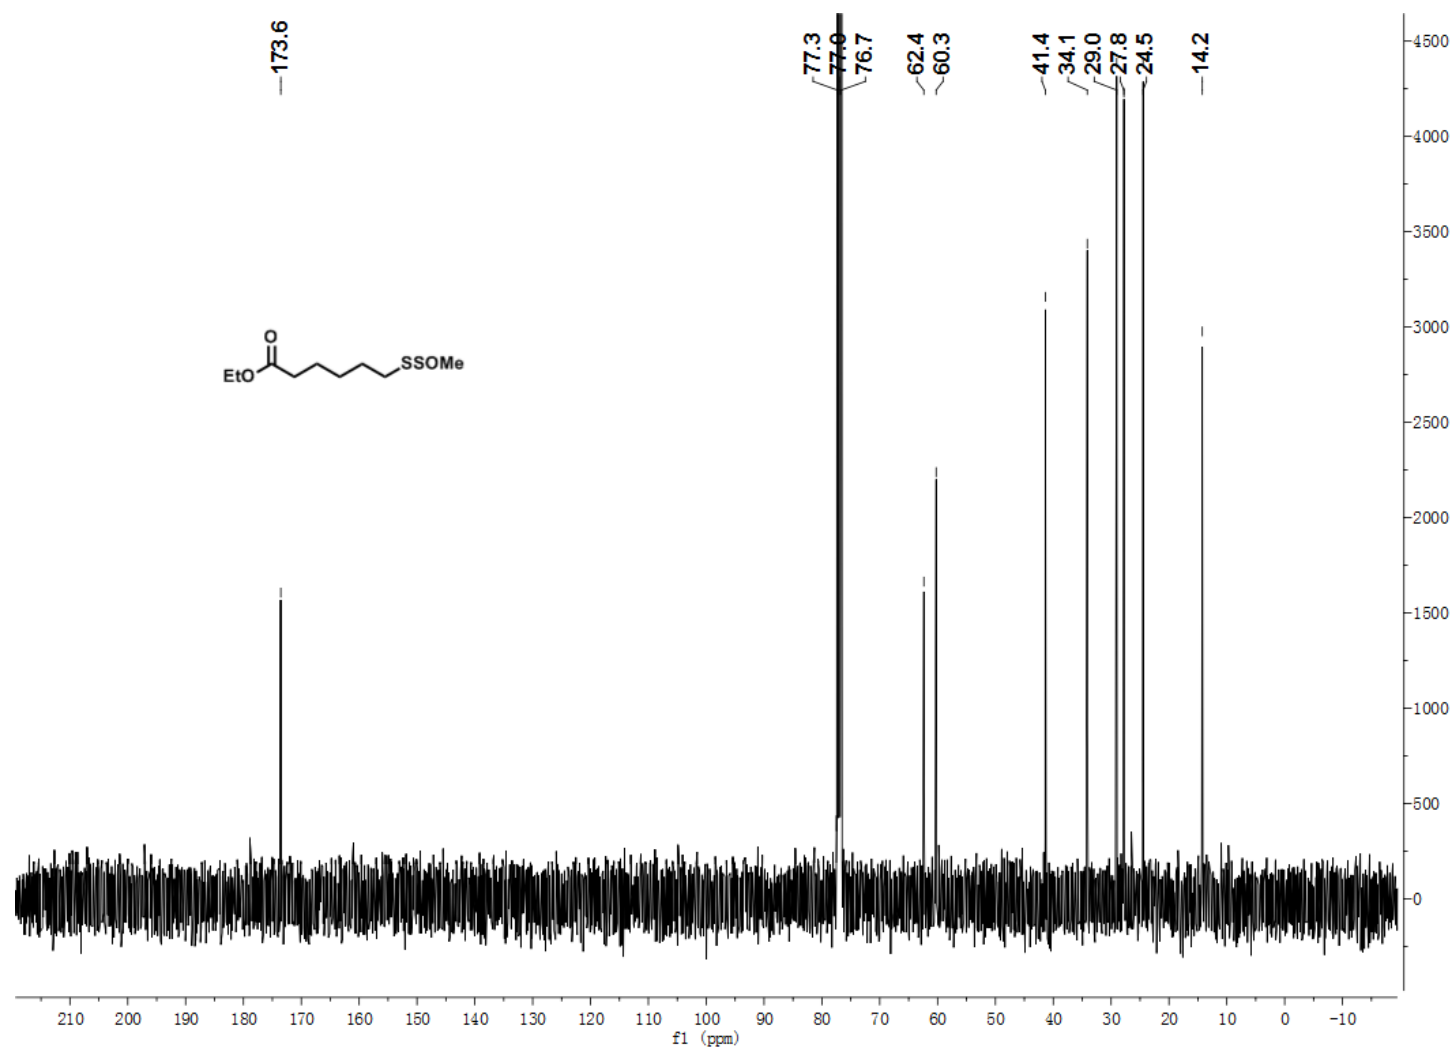

Supplementary Figure 28.  $^{13}\text{C}$  NMR spectra for Compound 21.

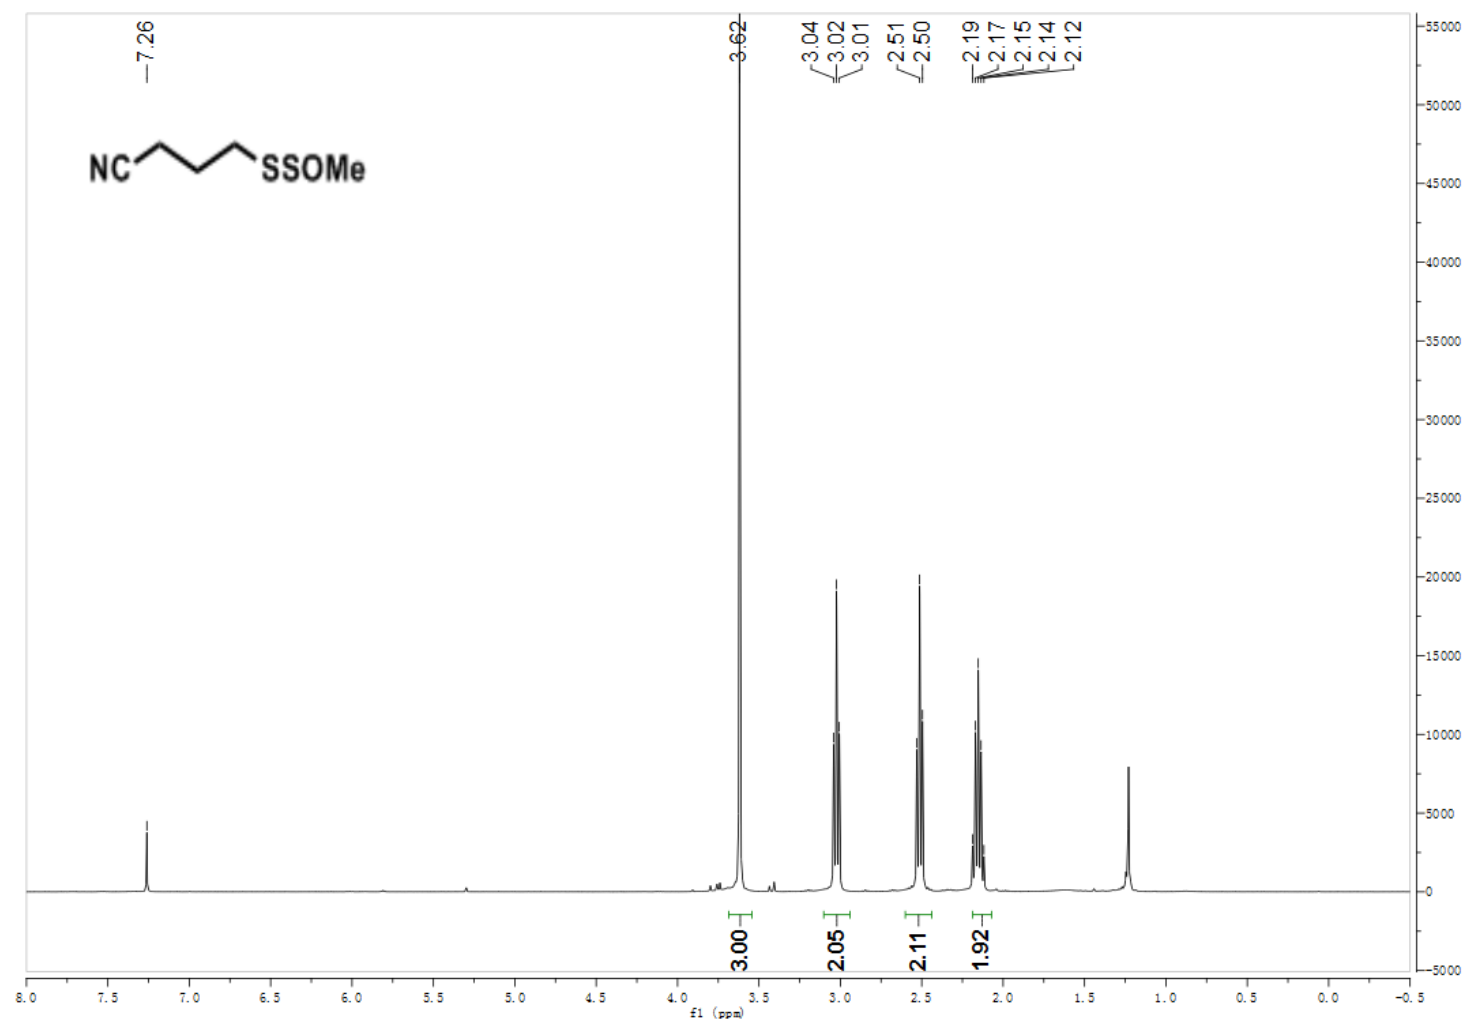

Supplementary Figure 29.  $^1\text{H}$  NMR spectra for Compound 2m.

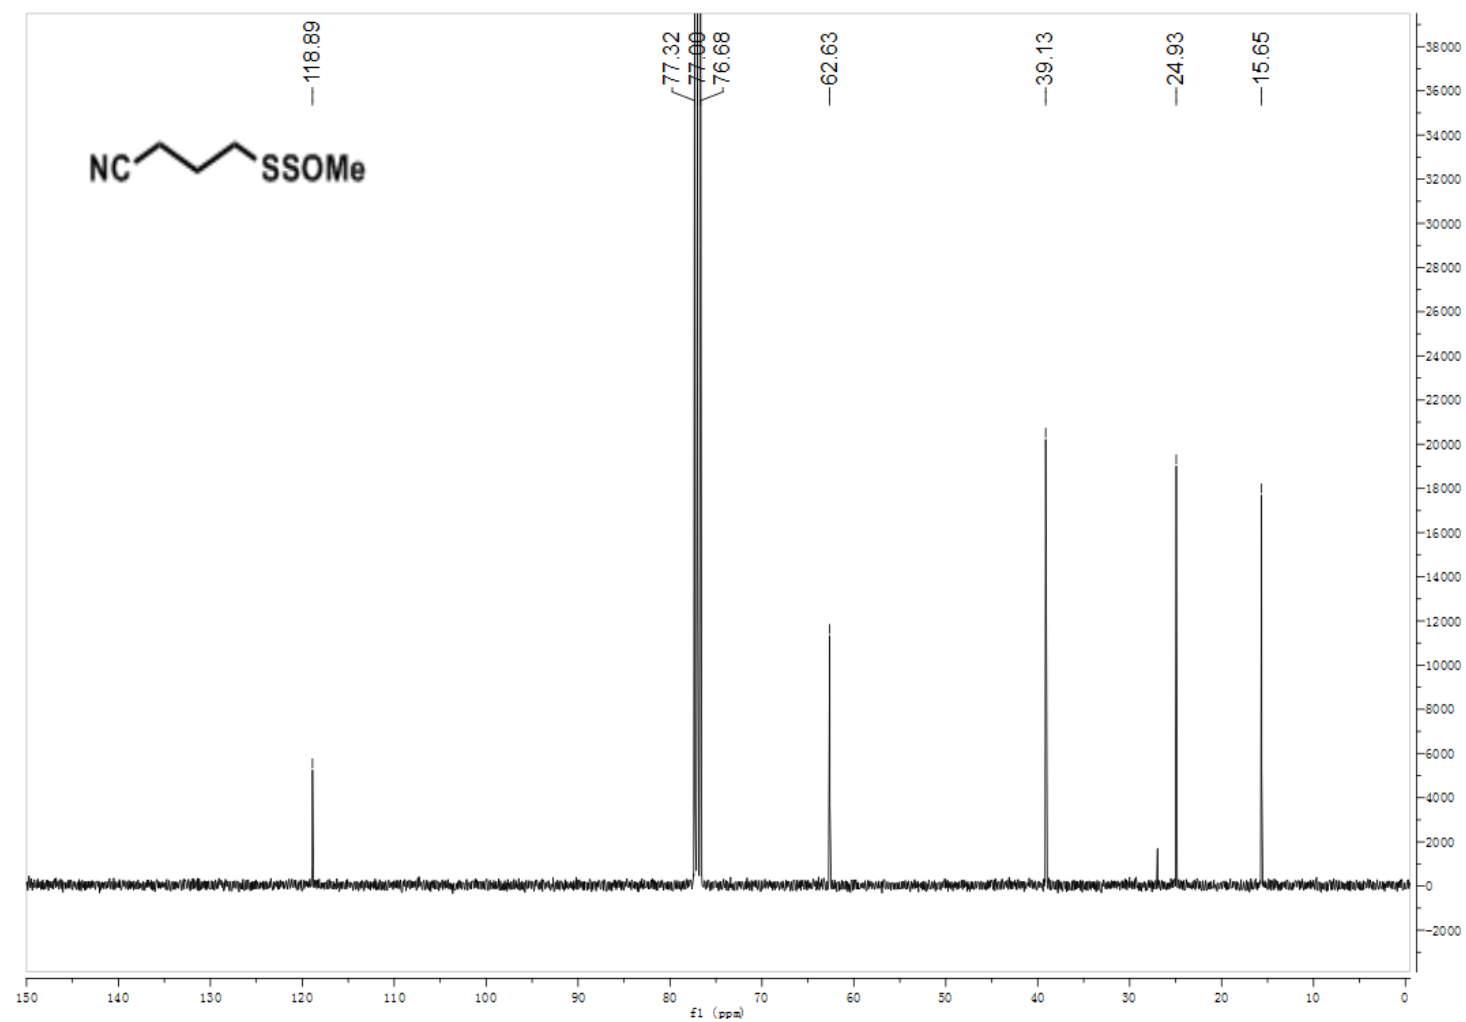

Supplementary Figure 30.  $^{13}\text{C}$  NMR spectra for Compound **2m**.

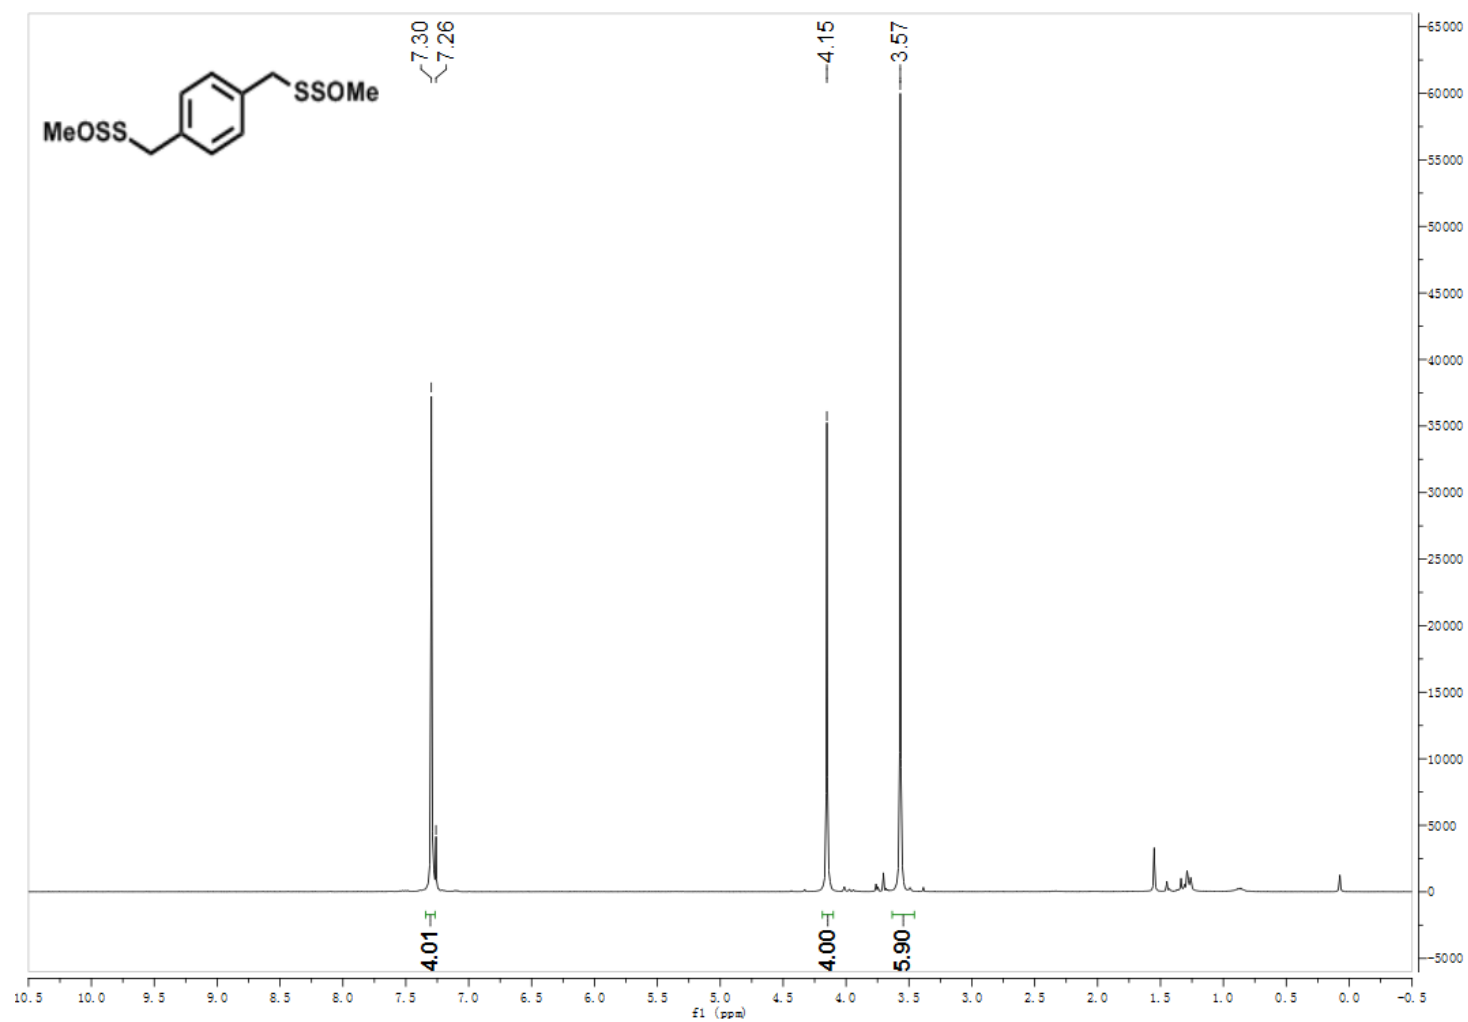

Supplementary Figure 31. <sup>1</sup>H NMR spectra for Compound 2n.

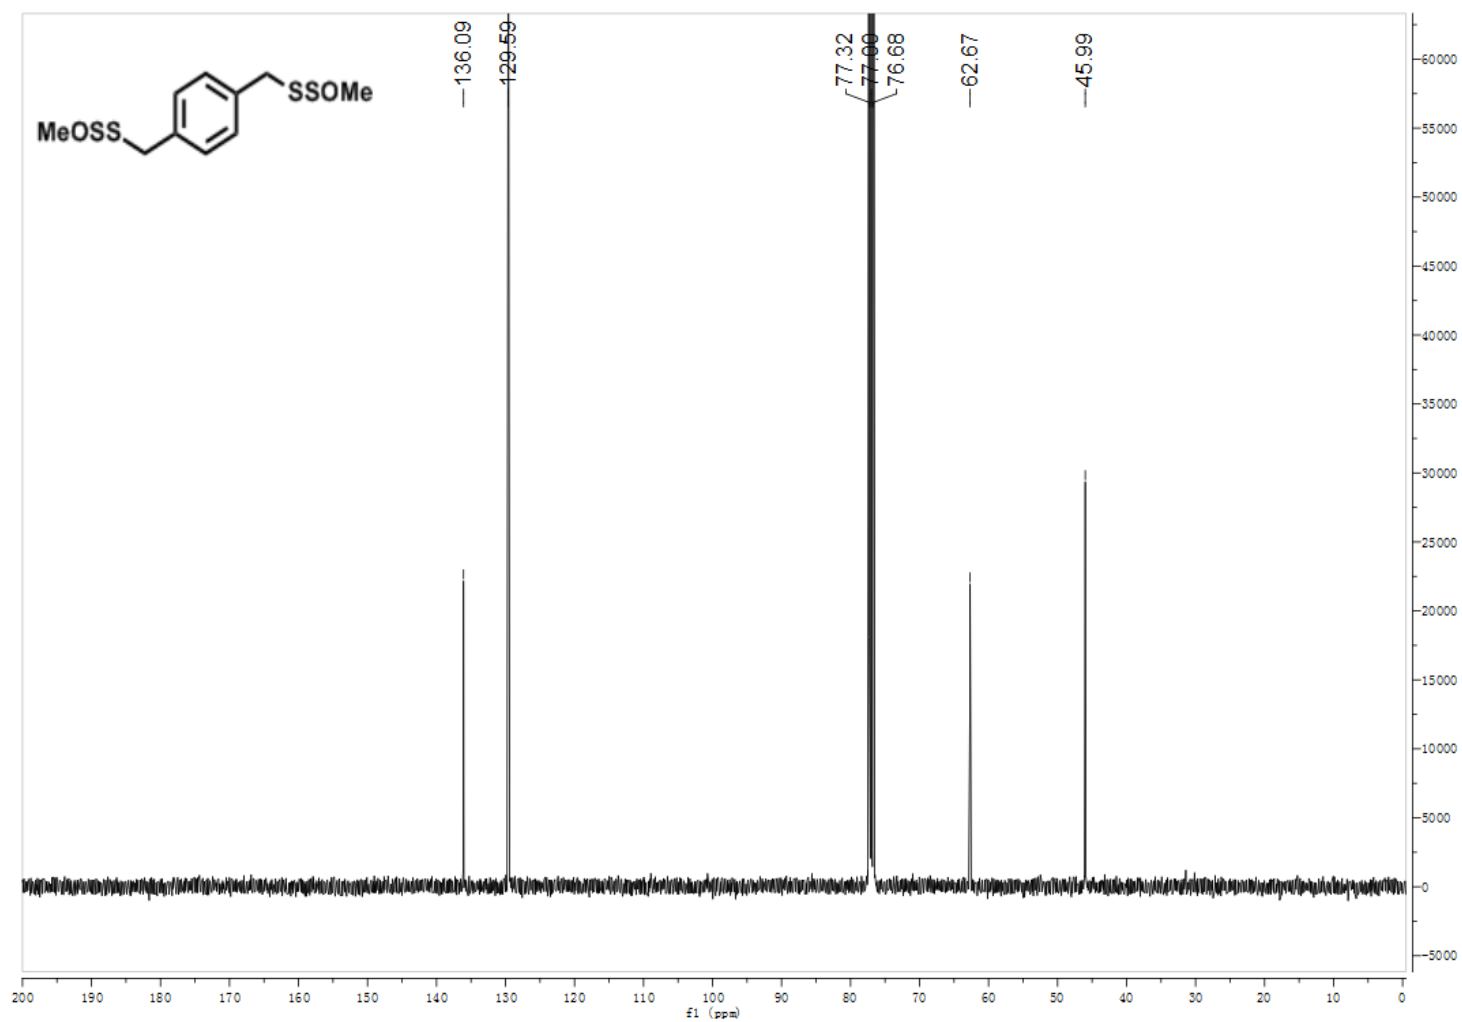

Supplementary Figure 32. <sup>13</sup>C NMR spectra for Compound 2n.

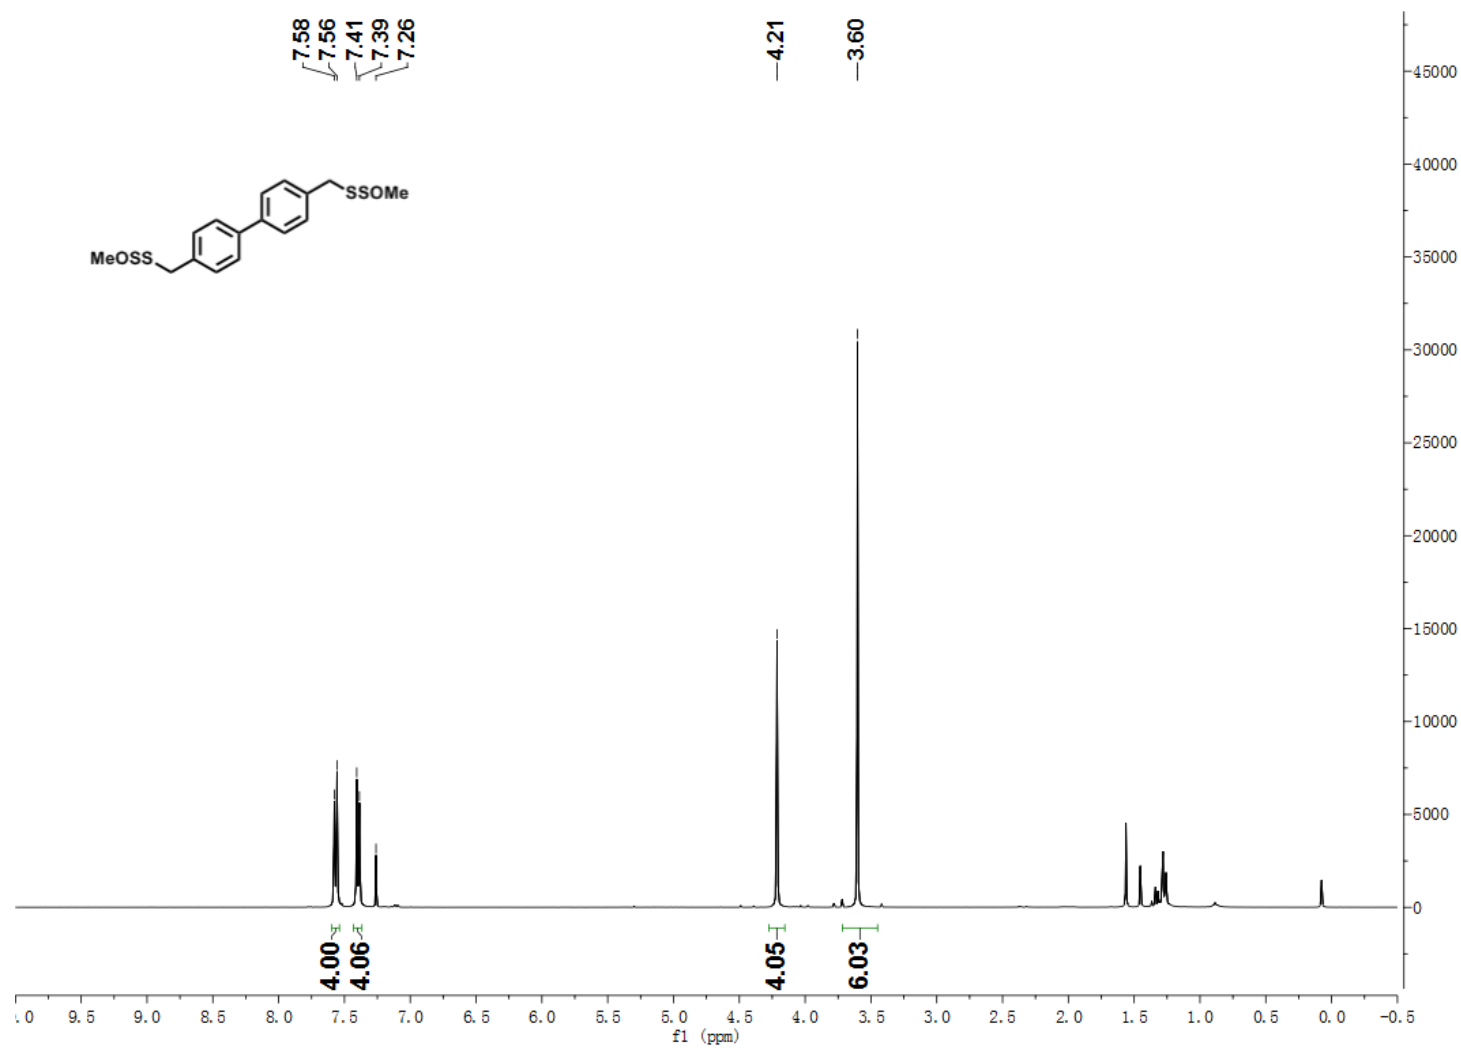

Supplementary Figure 33. <sup>1</sup>H NMR spectra for Compound 2o.

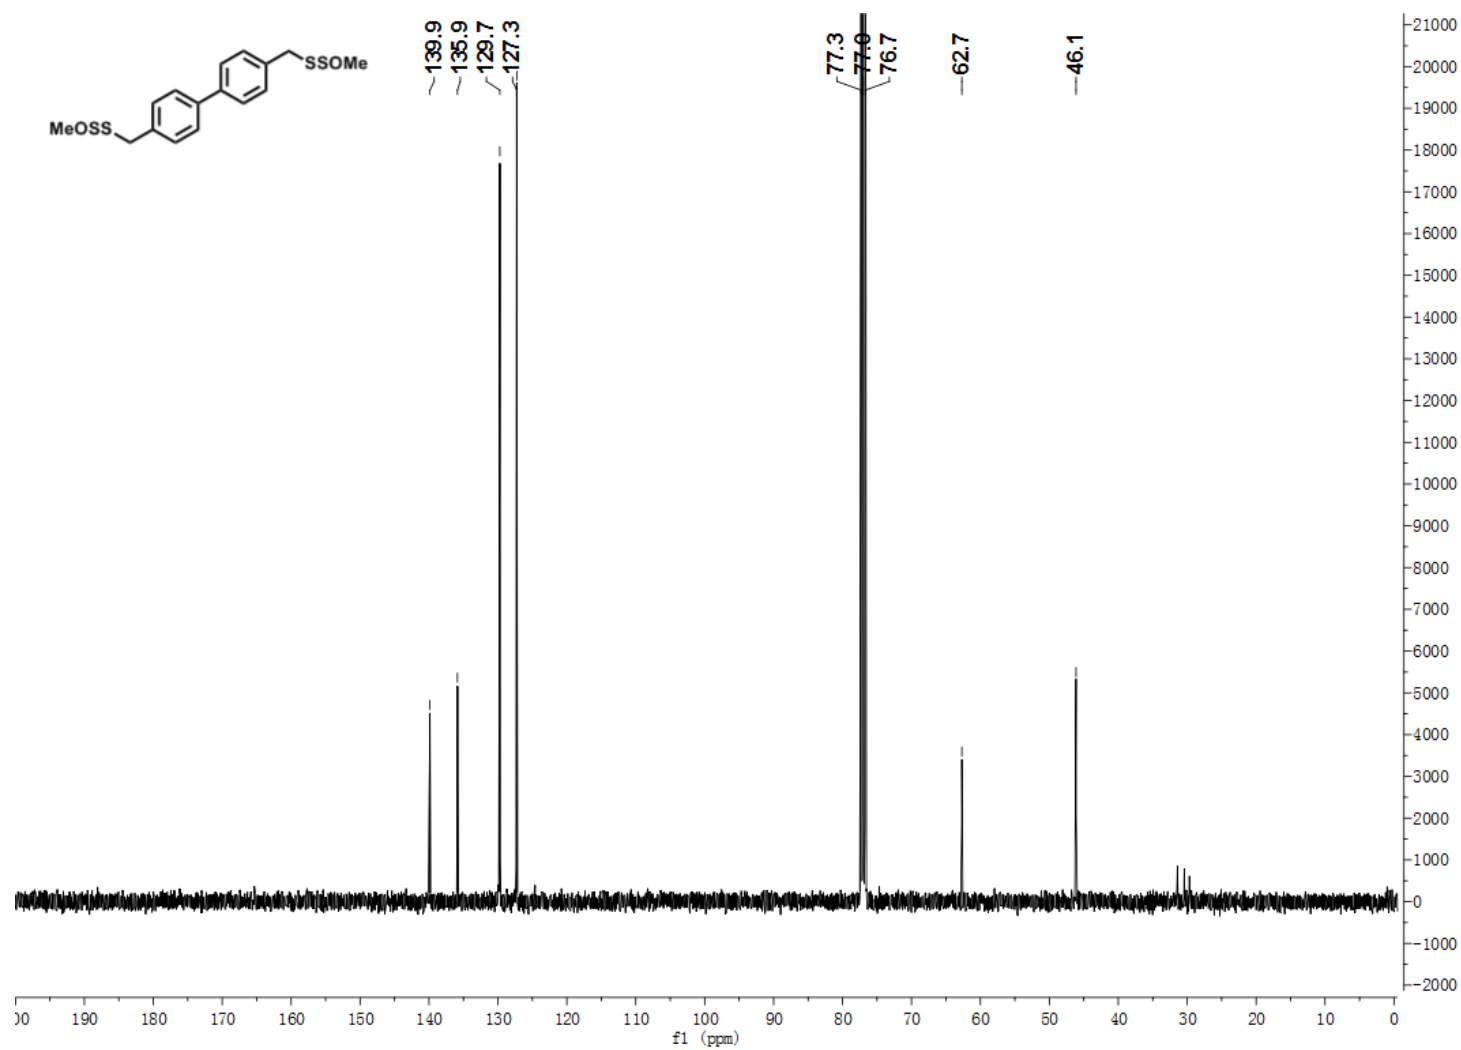

Supplementary Figure 34. <sup>13</sup>C NMR spectra for Compound 2o.

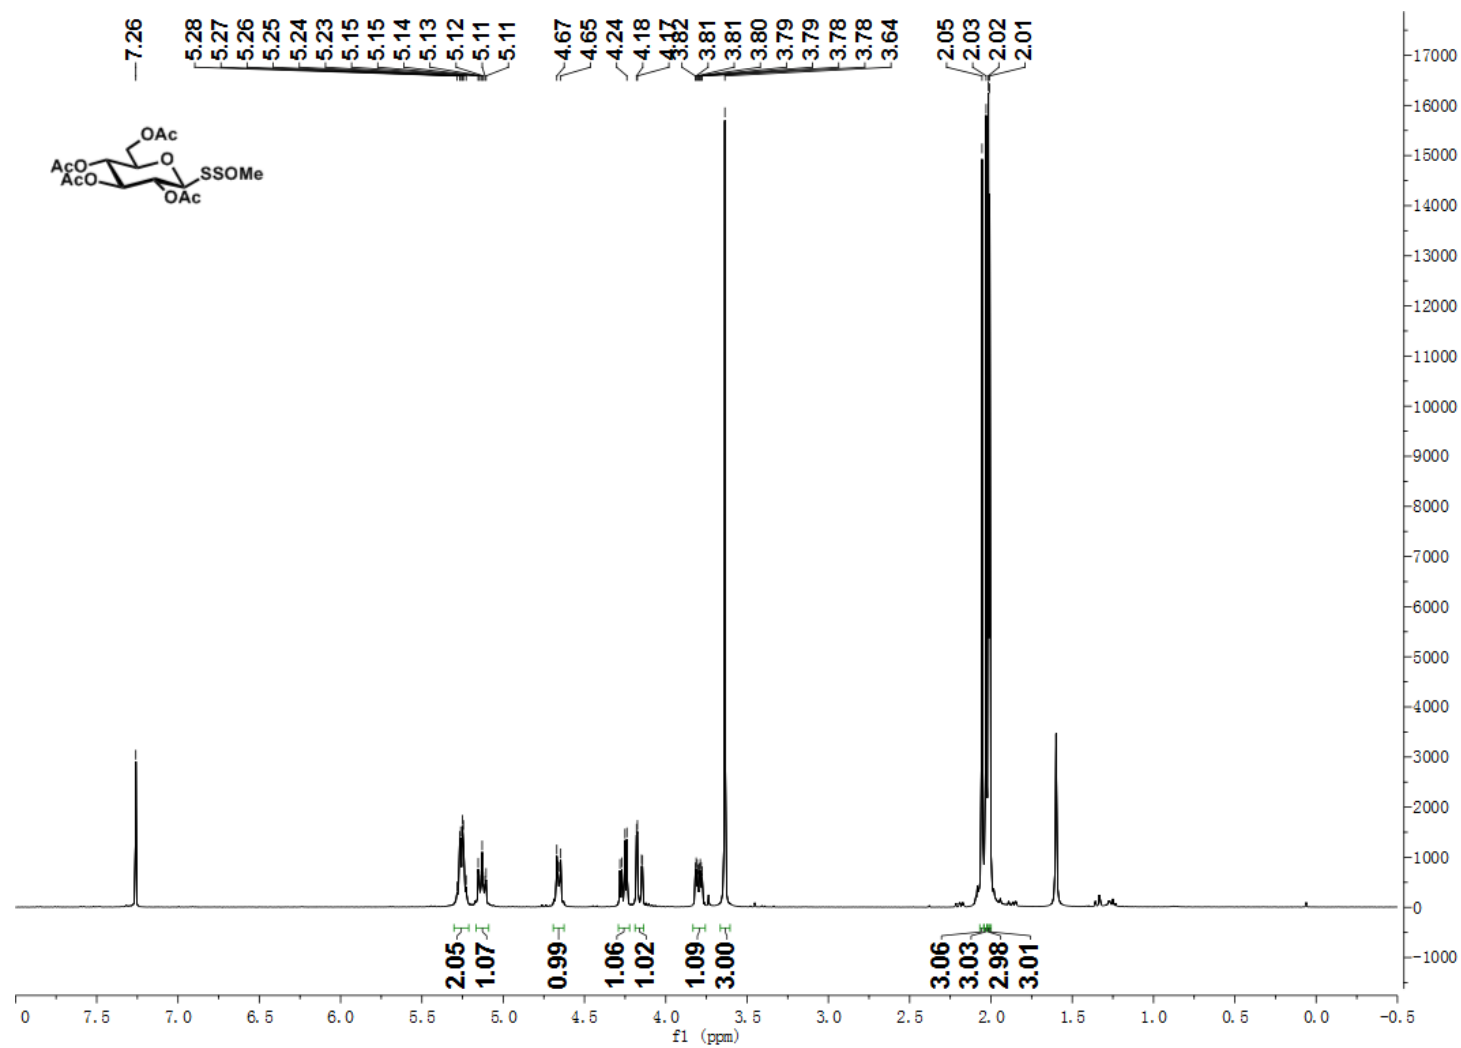

Supplementary Figure 35.  $^1\text{H}$  NMR spectra for Compound 2p.

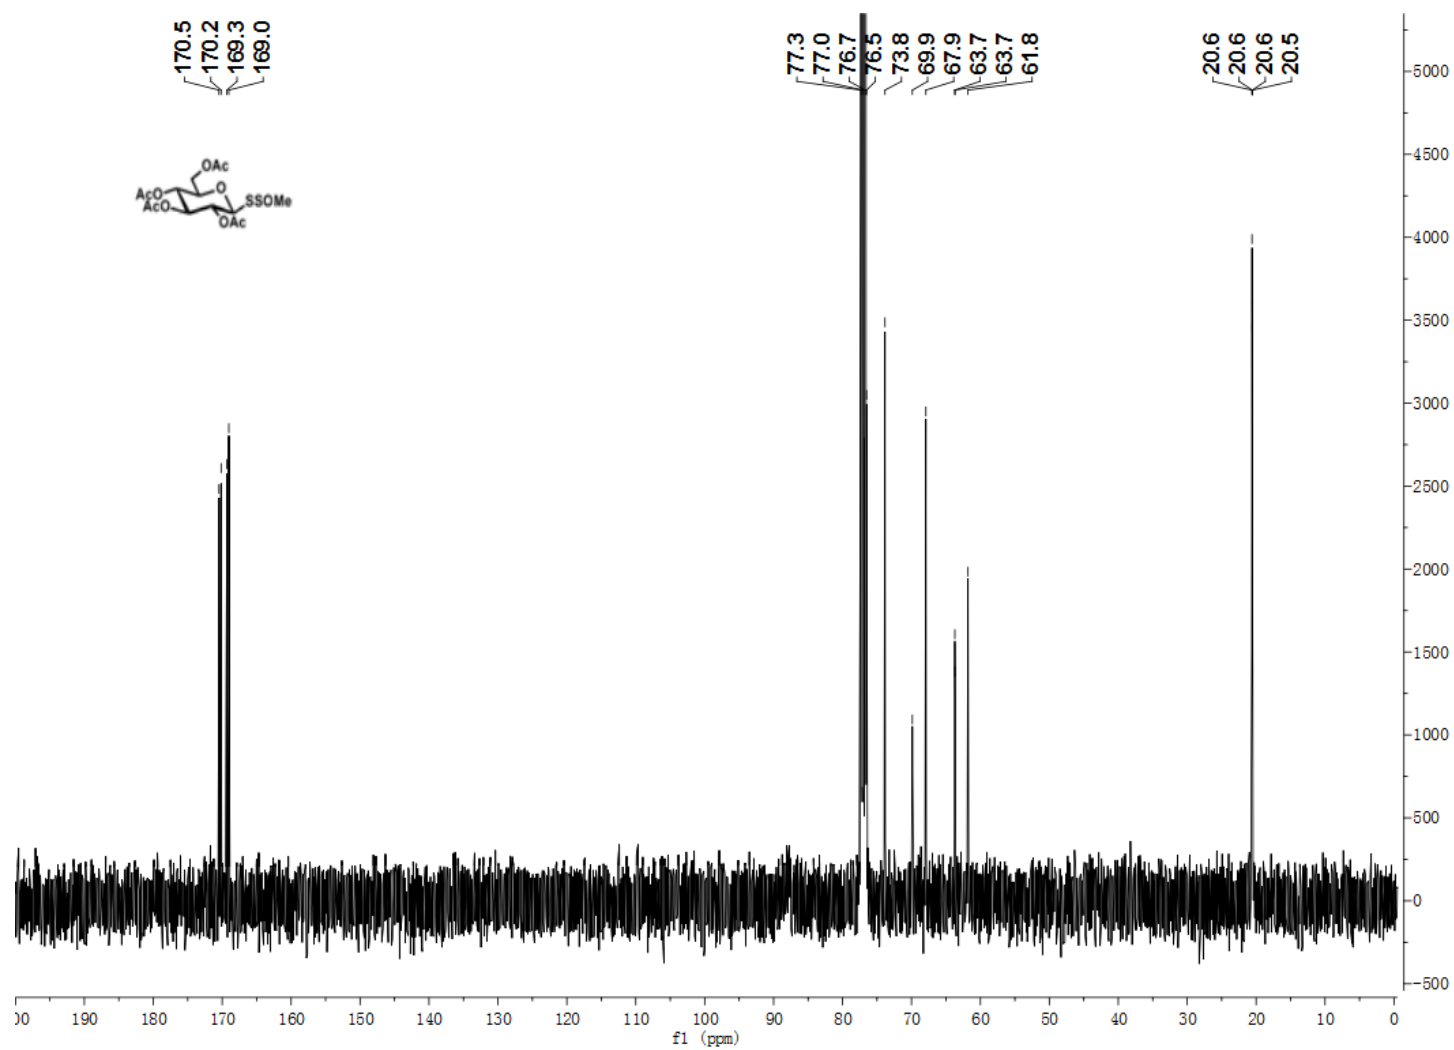

Supplementary Figure 36. <sup>13</sup>C NMR spectra for Compound 2p.

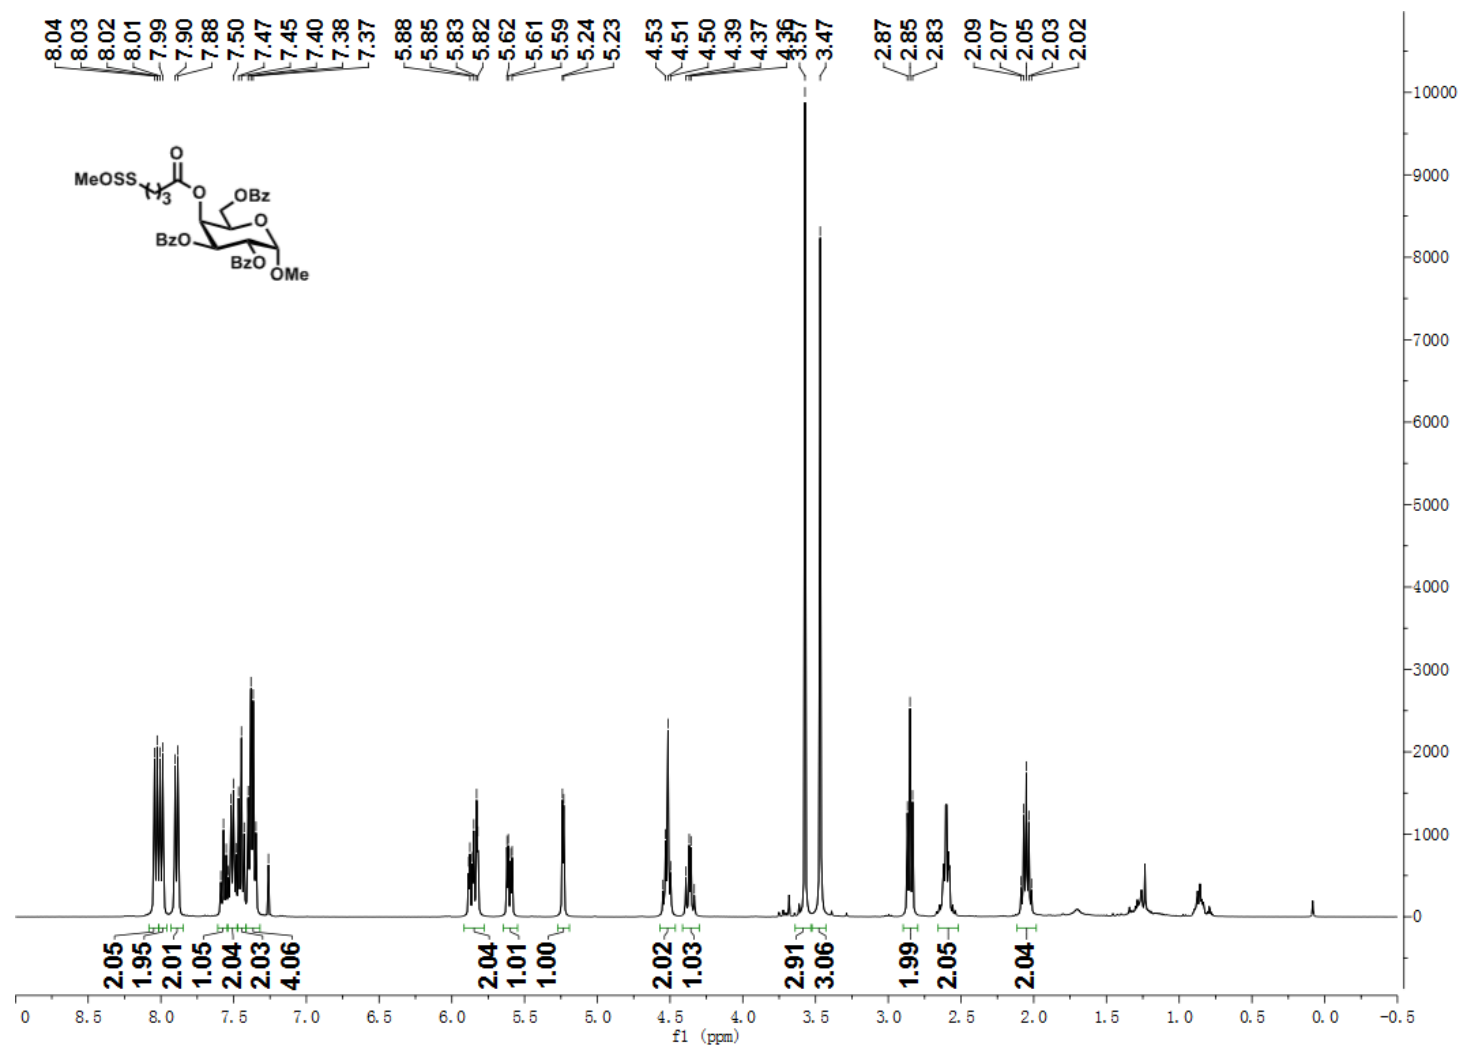

Supplementary Figure 37. <sup>1</sup>H NMR spectra for Compound 2q.

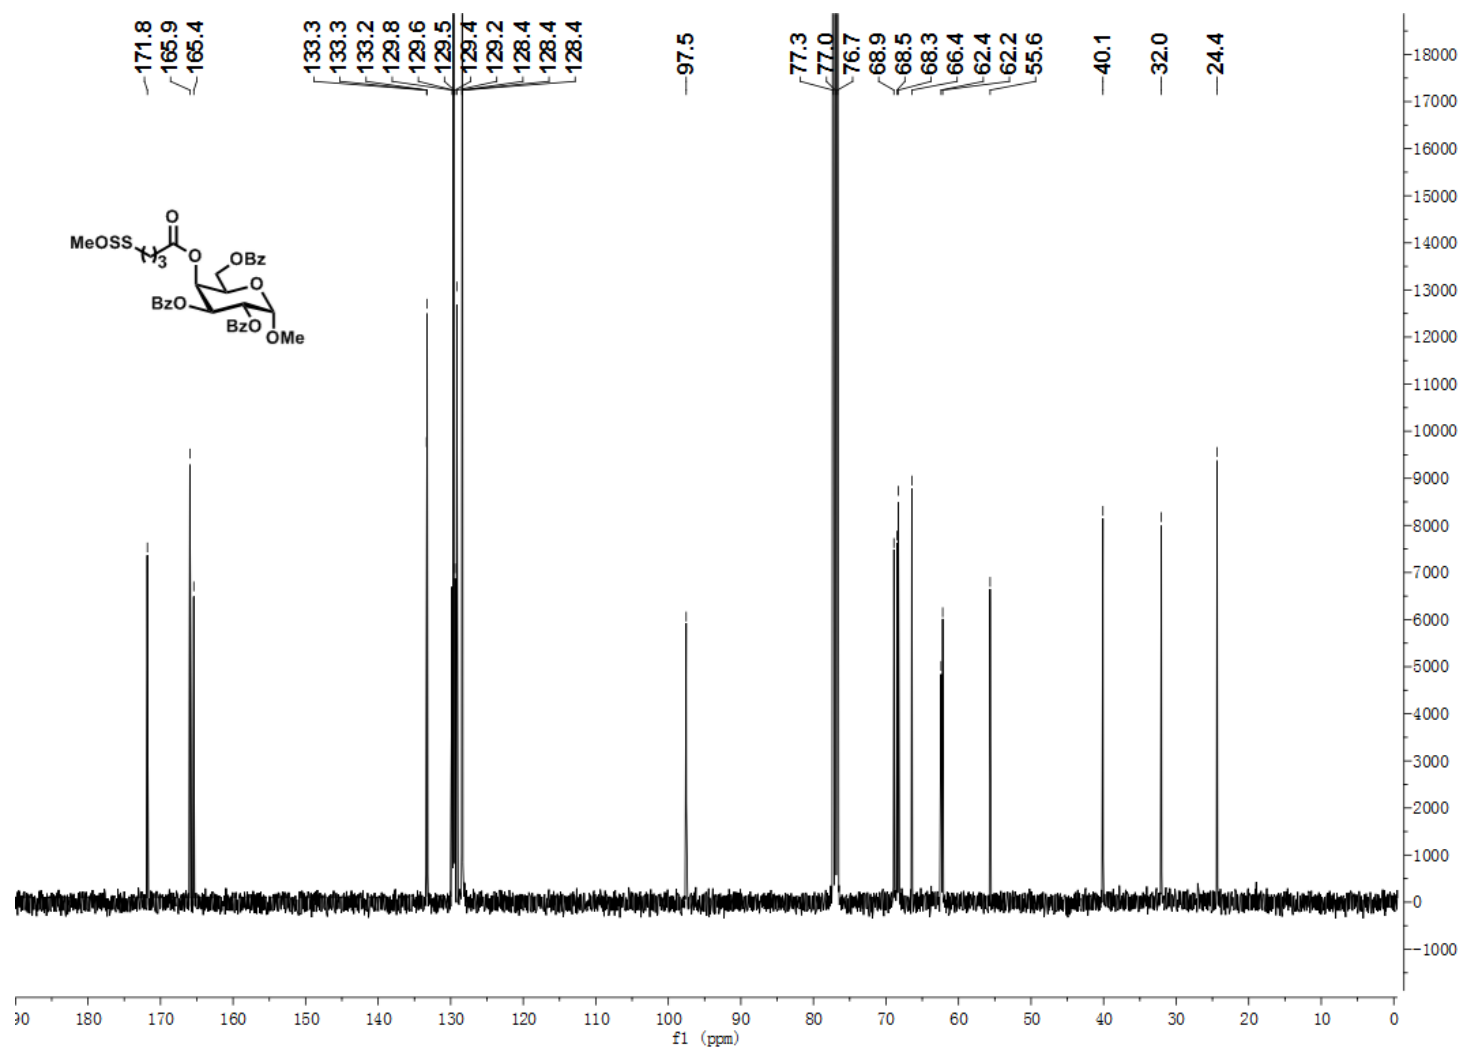

Supplementary Figure 38. <sup>13</sup>C NMR spectra for Compound 2q.

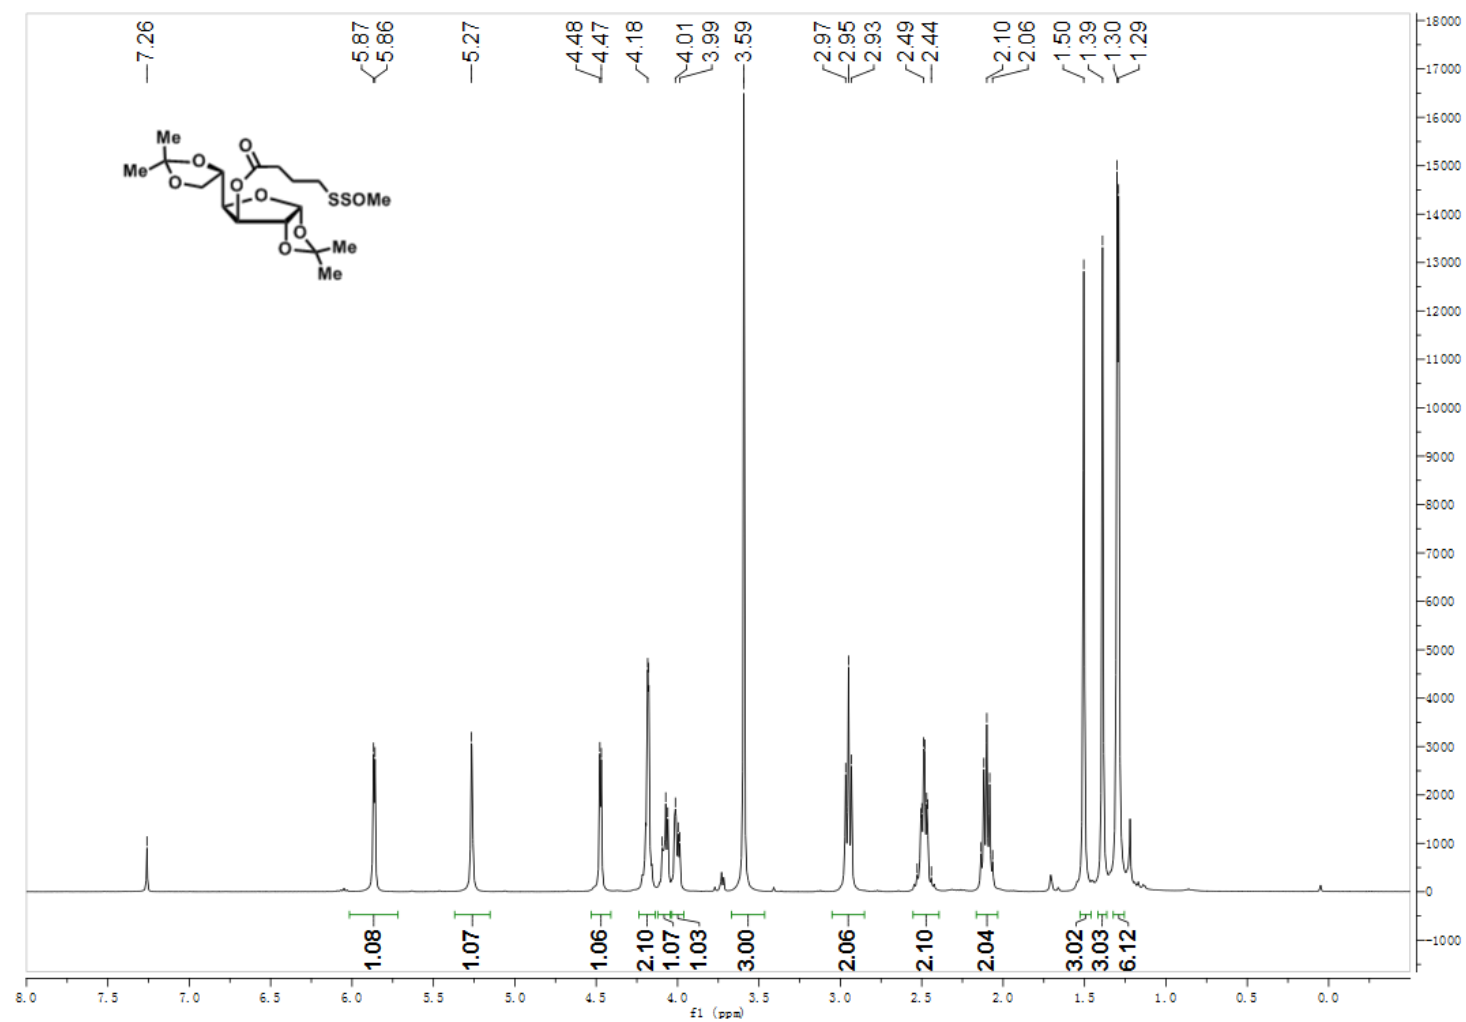

Supplementary Figure 39.  $^1\text{H}$  NMR spectra for Compound 2r.

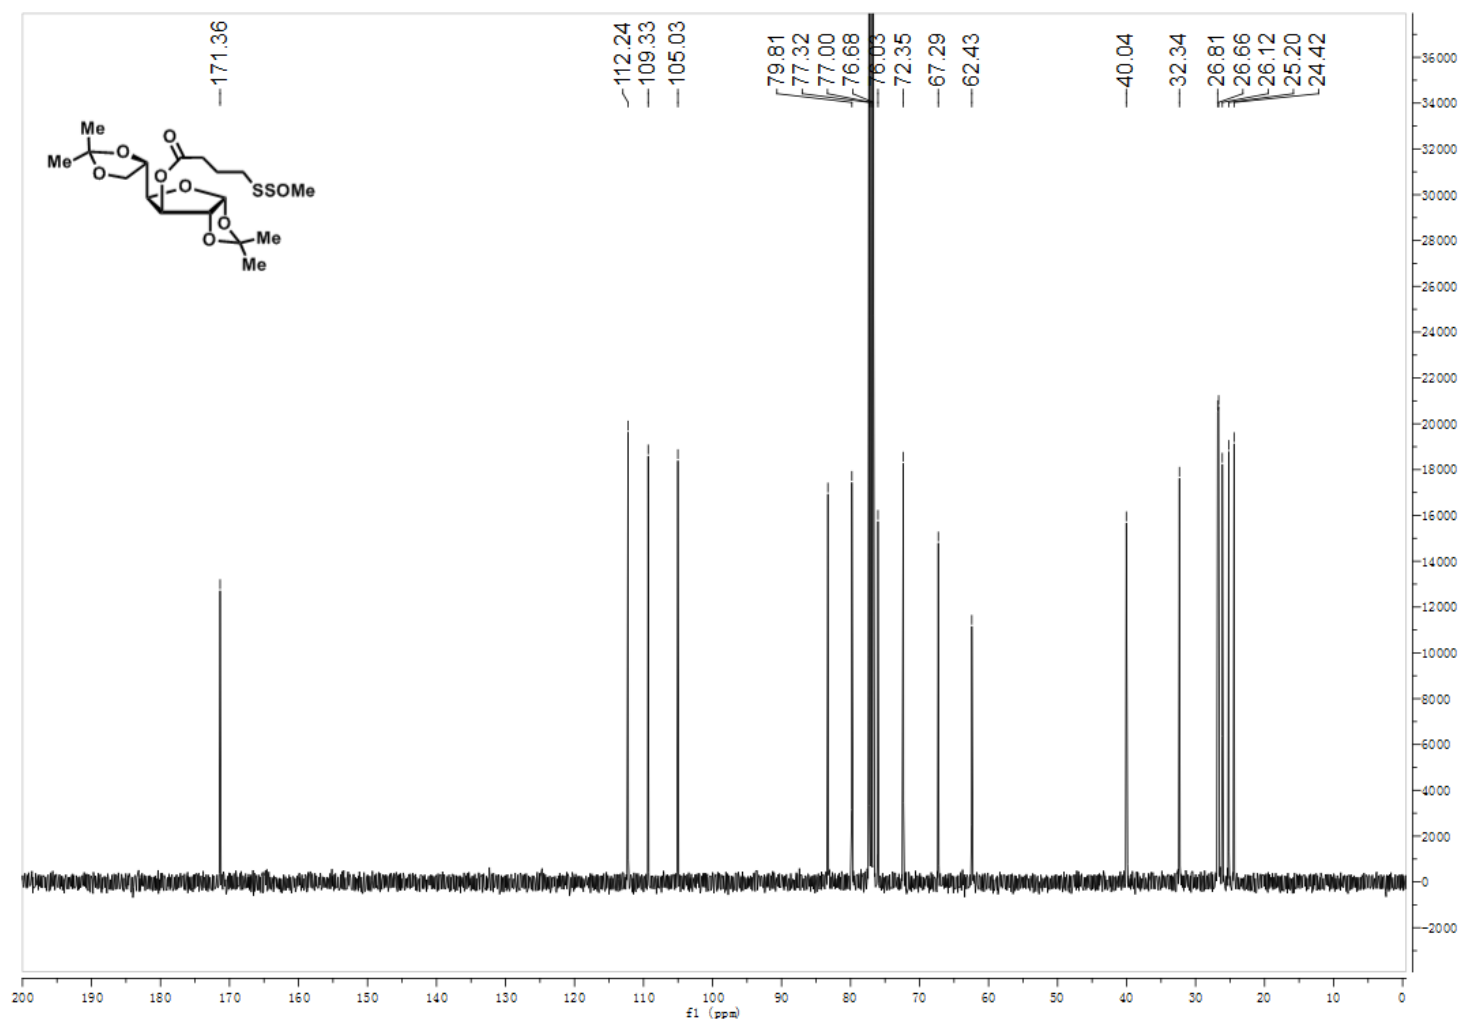

Supplementary Figure 40.  $^{13}\text{C}$  NMR spectra for Compound 2r.

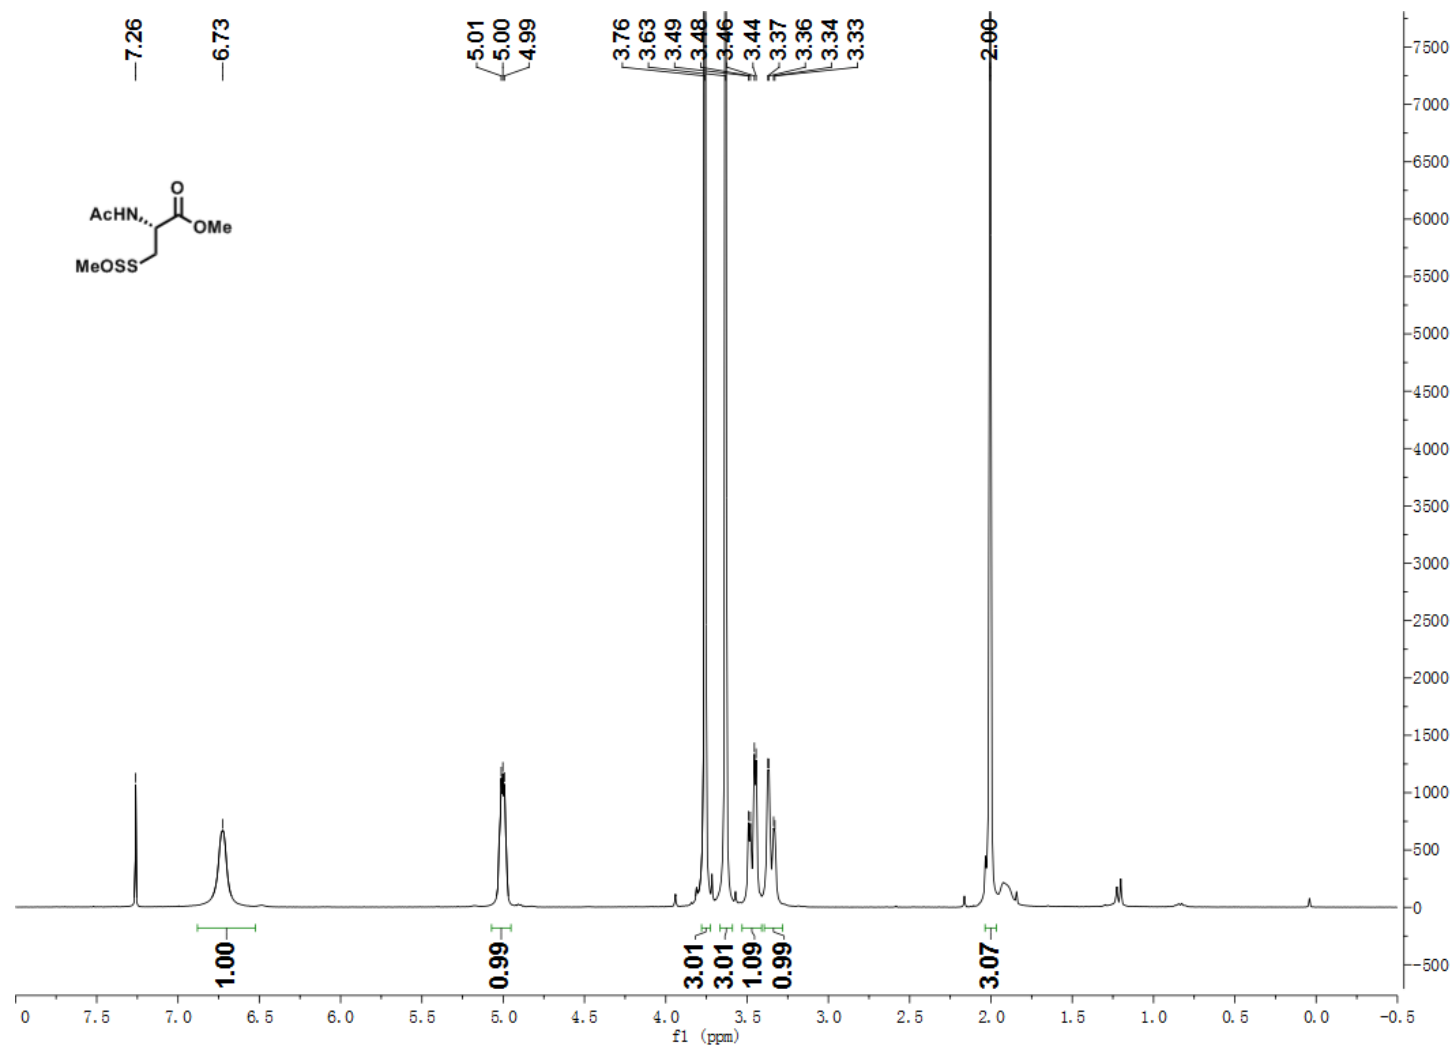

Supplementary Figure 41. <sup>1</sup>H NMR spectra for Compound 2s.

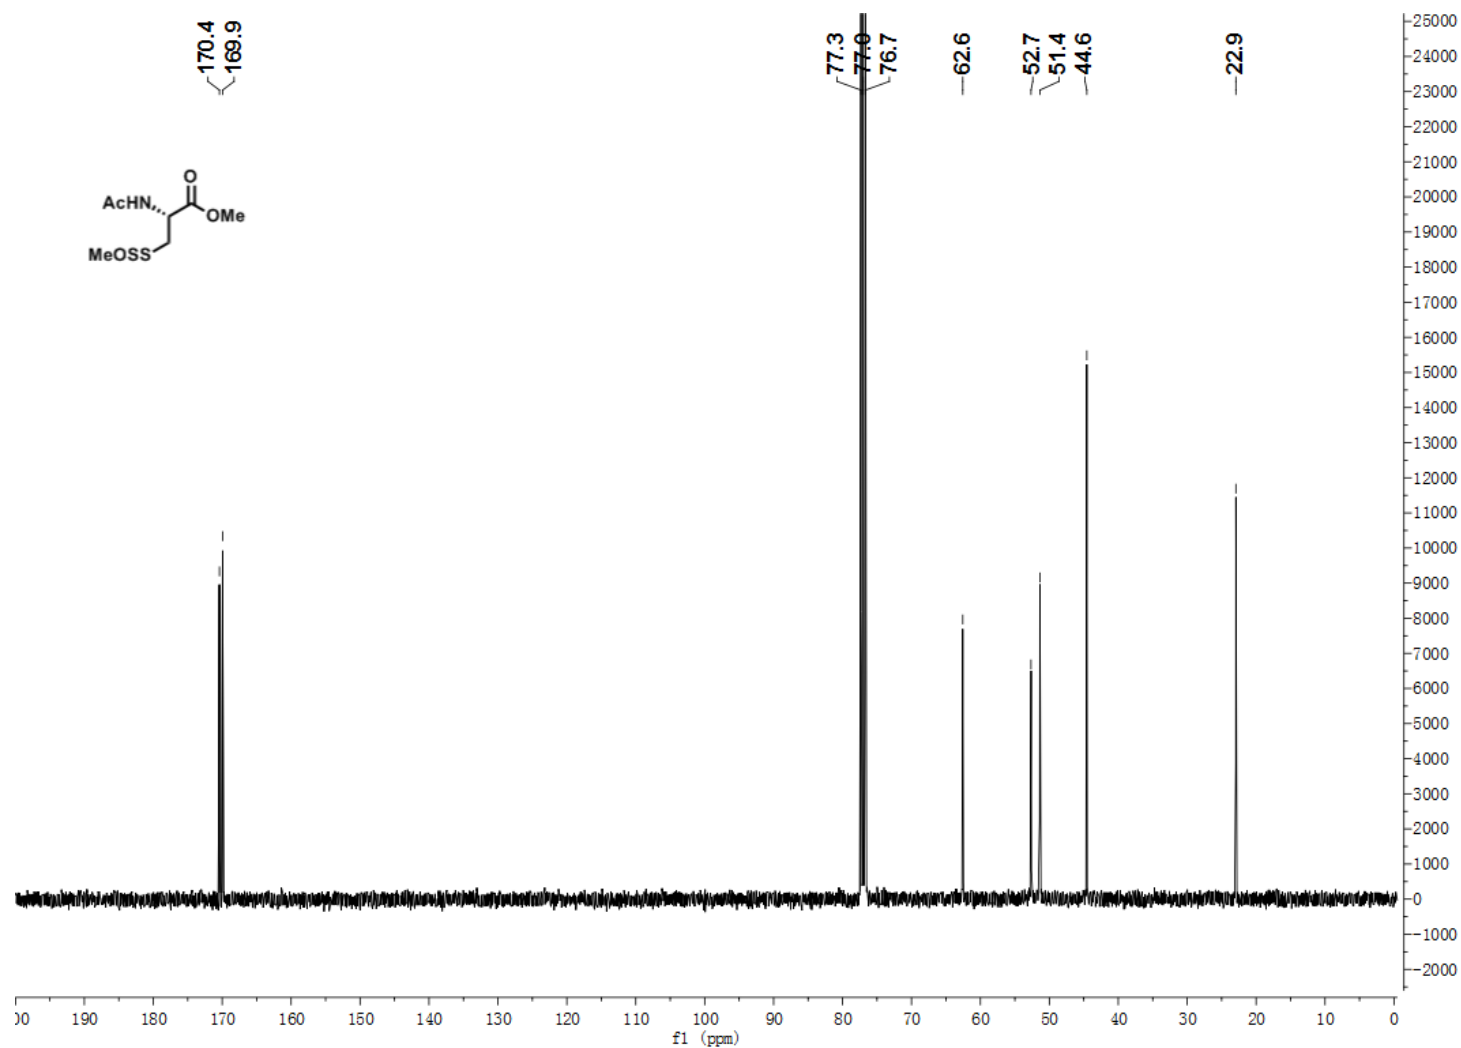

Supplementary Figure 42.  $^{13}\text{C}$  NMR spectra for Compound 2s.

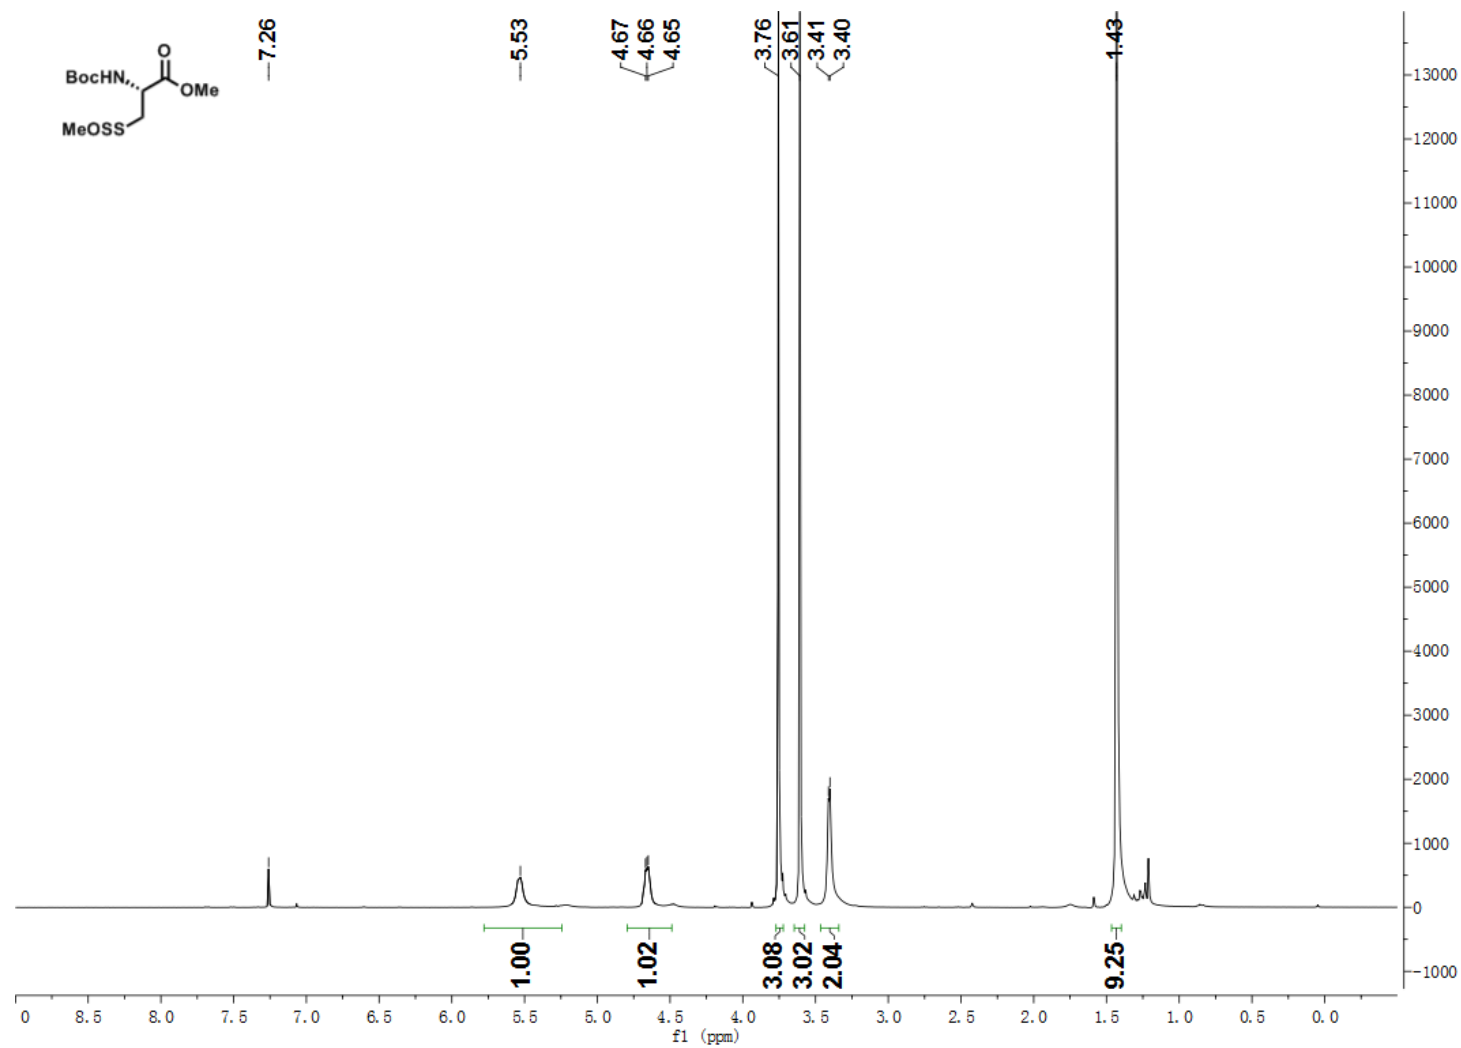

Supplementary Figure 43. <sup>1</sup>H NMR spectra for Compound 2t.

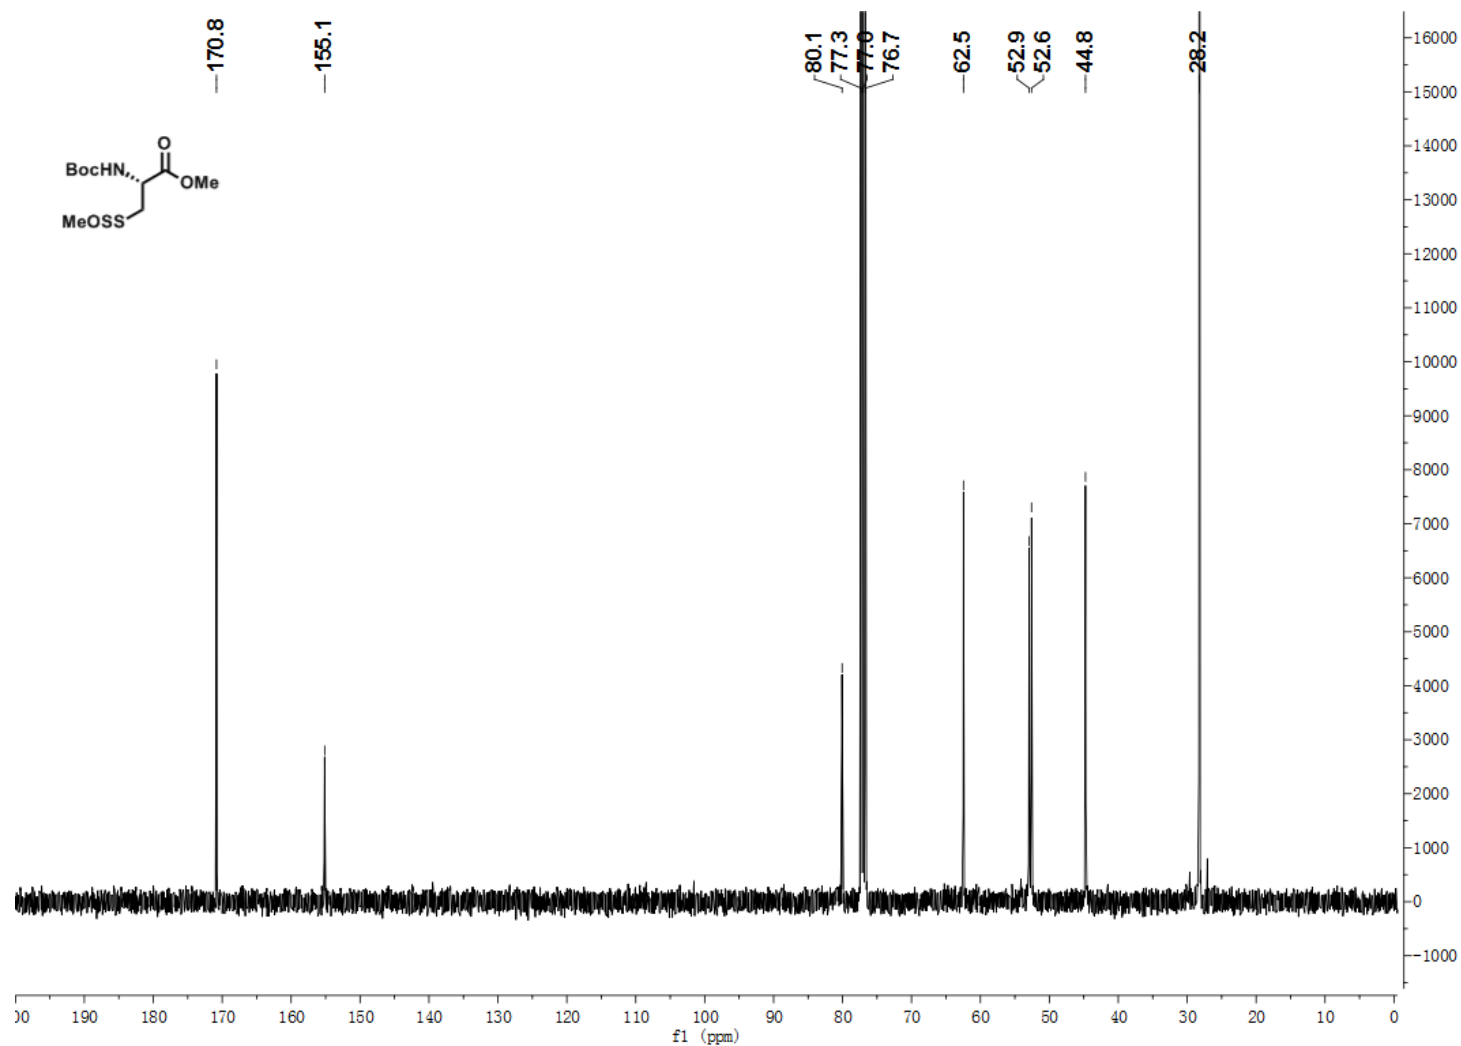

Supplementary Figure 44.  $^{13}\text{C}$  NMR spectra for Compound 2t.

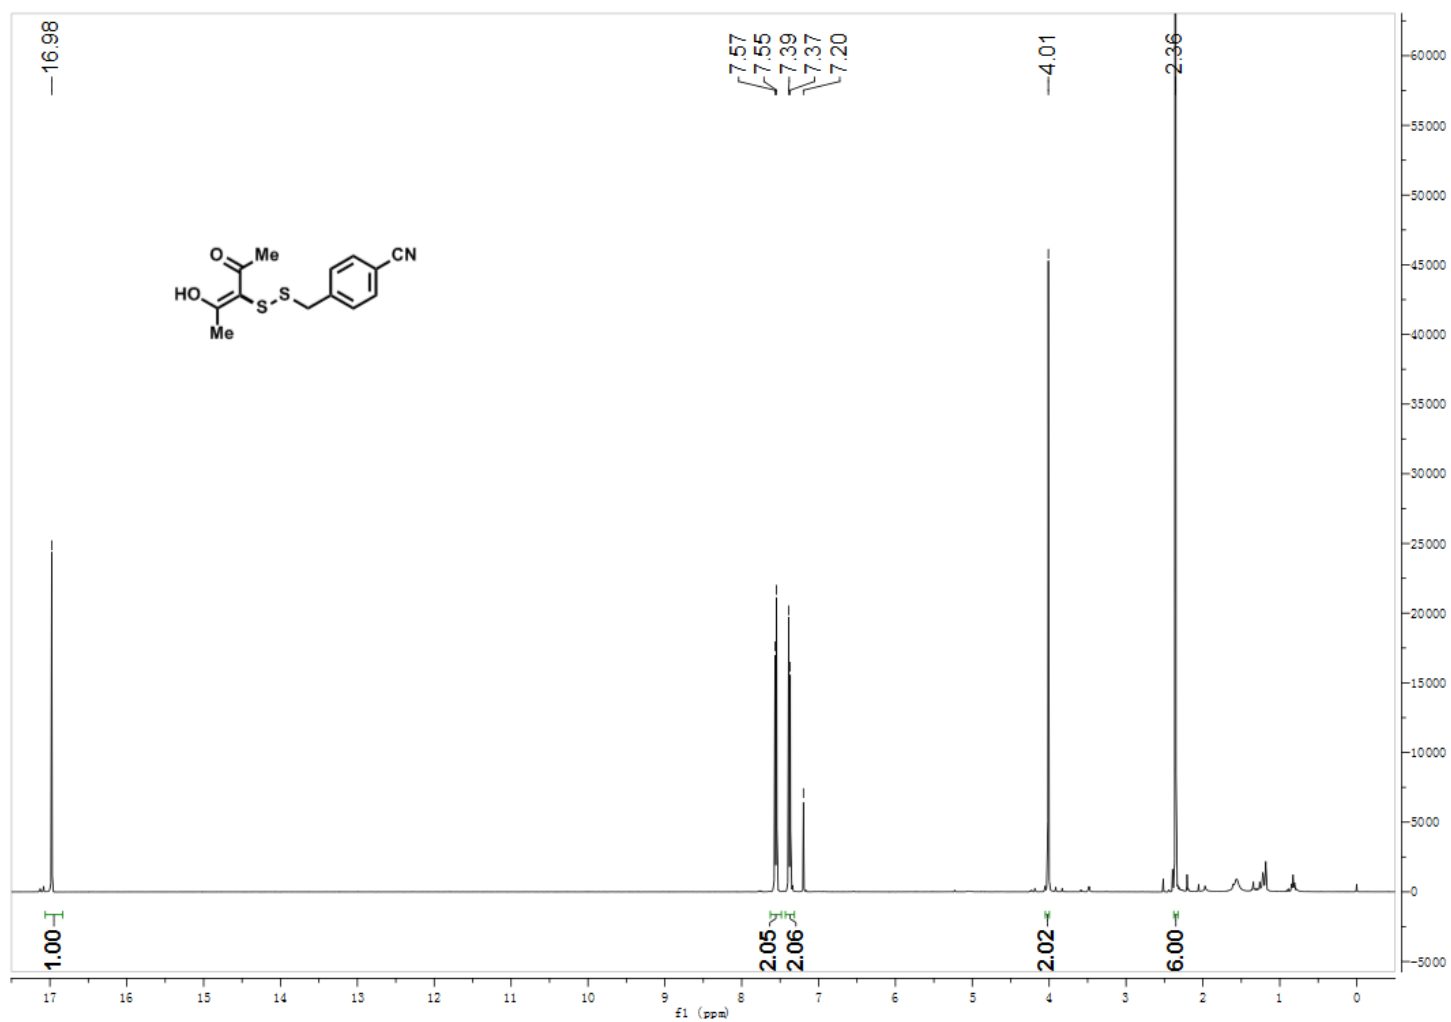

Supplementary Figure 45. <sup>1</sup>H NMR spectra for Compound 3a.

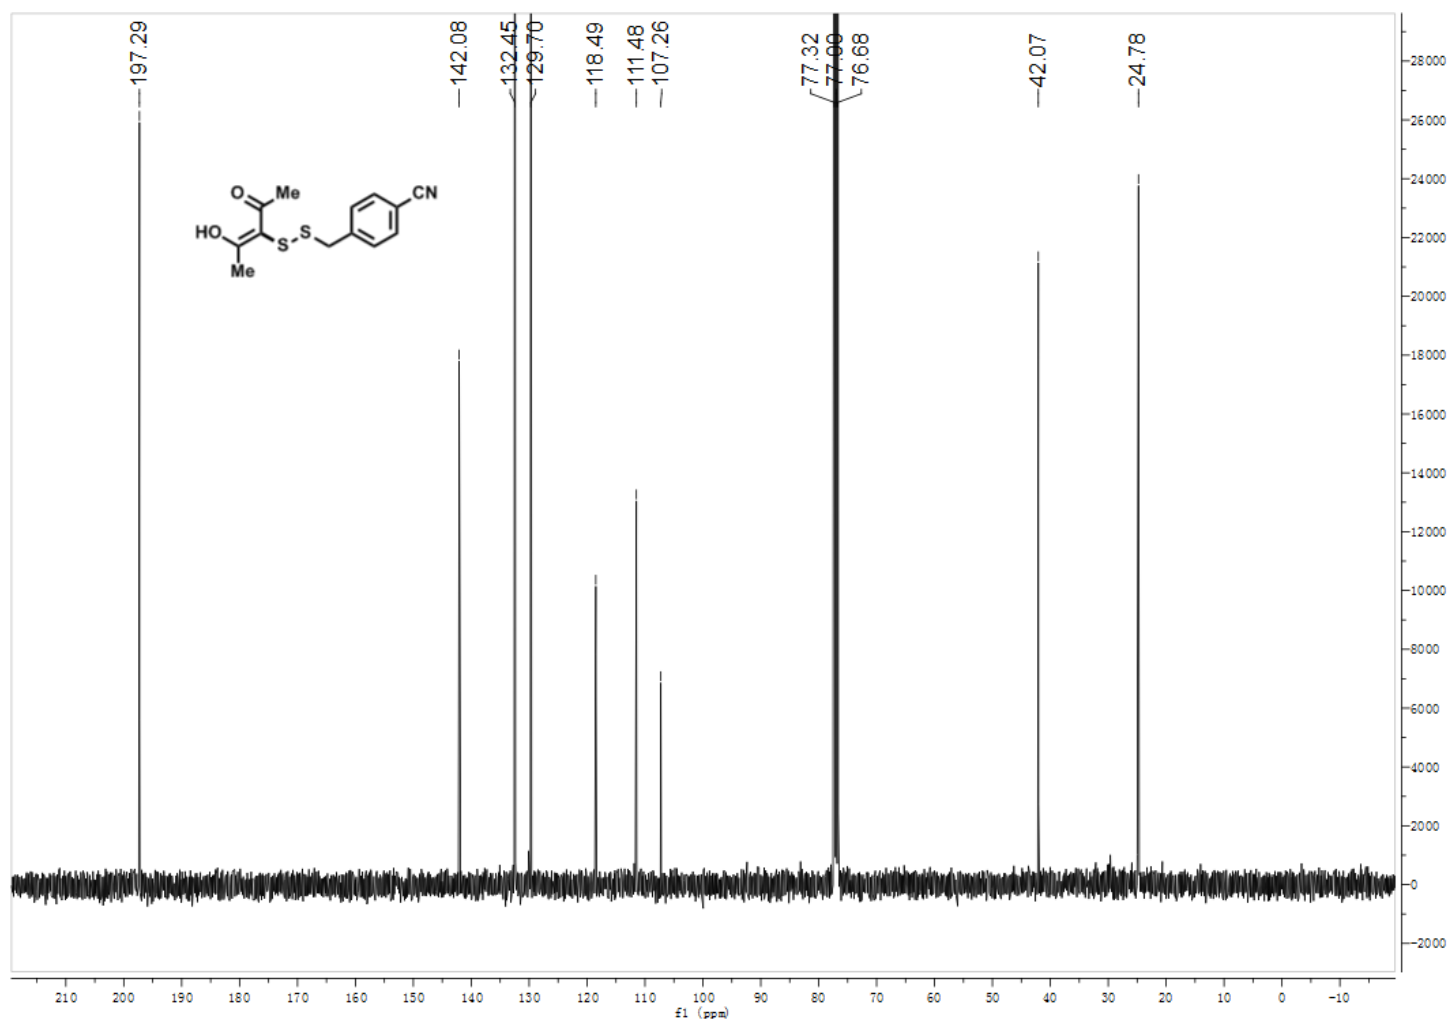

Supplementary Figure 46. <sup>13</sup>C NMR spectra for Compound 3a.

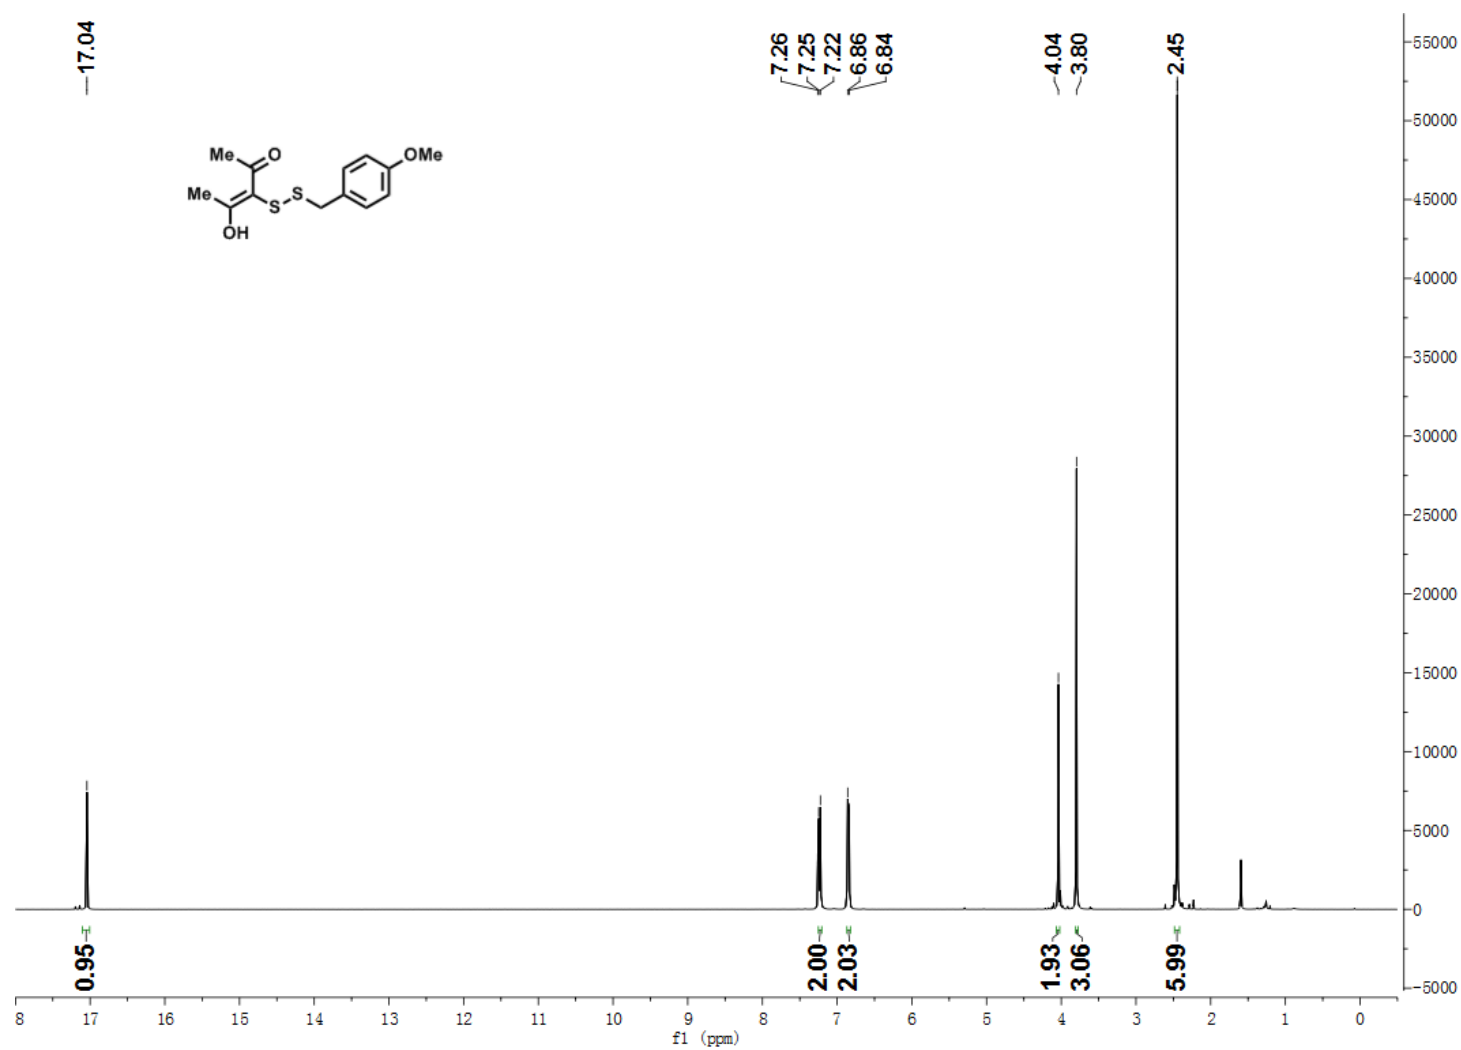

Supplementary Figure 47. <sup>1</sup>H NMR spectra for Compound 3b.

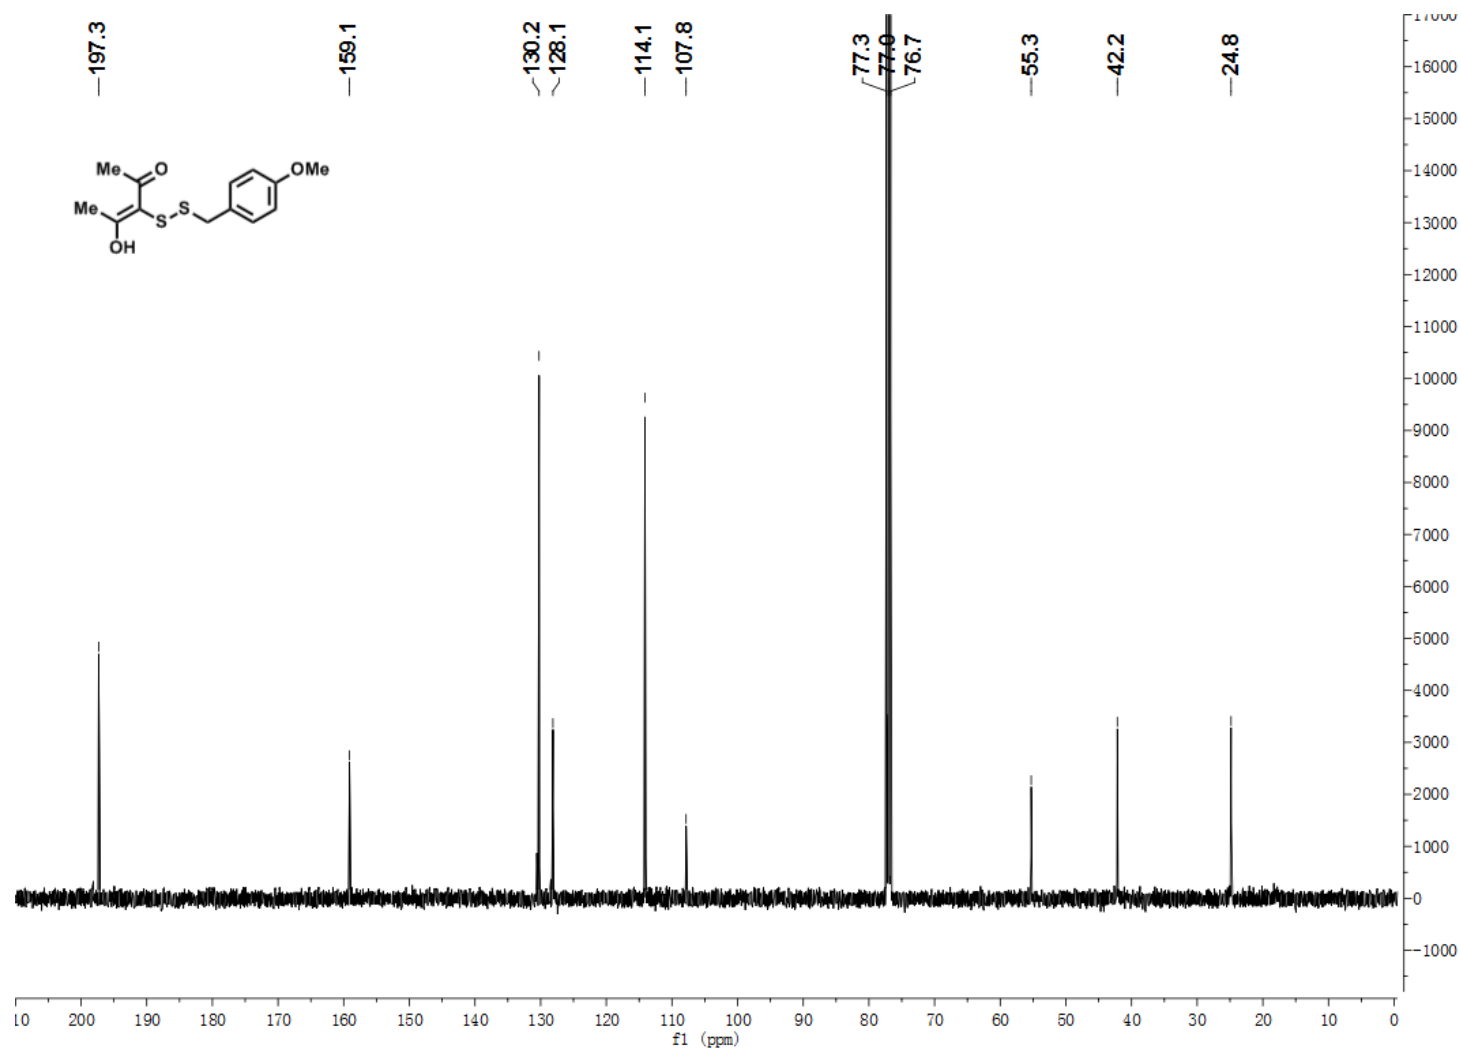

Supplementary Figure 48. <sup>13</sup>C NMR spectra for Compound 3b.

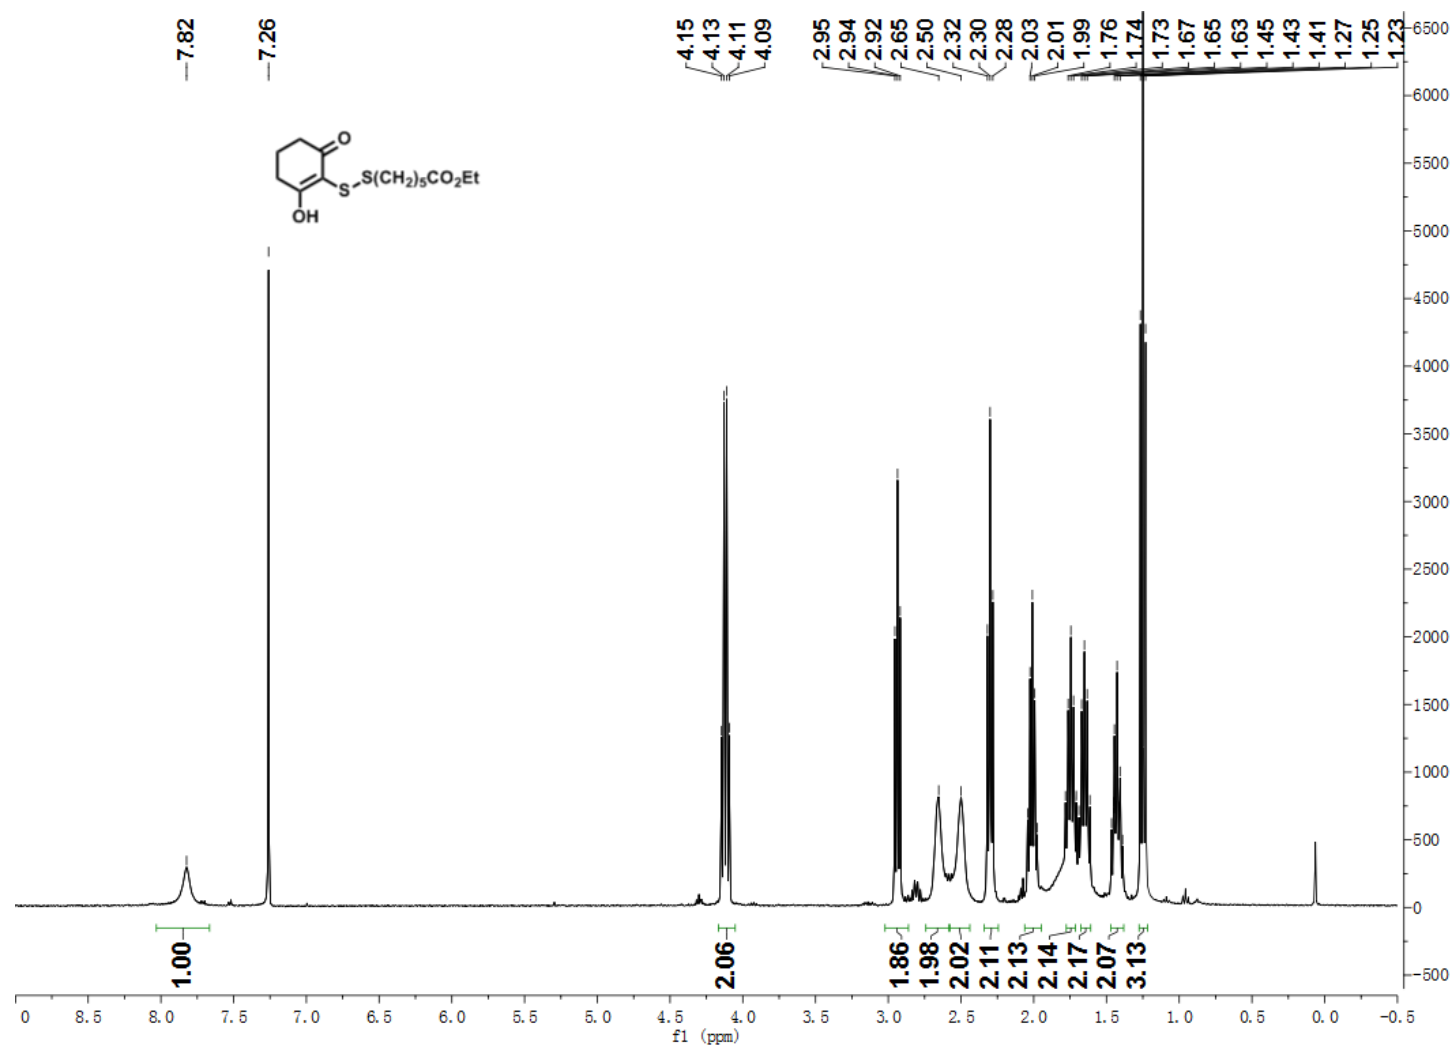

Supplementary Figure 49. <sup>1</sup>H NMR spectra for Compound 3c.

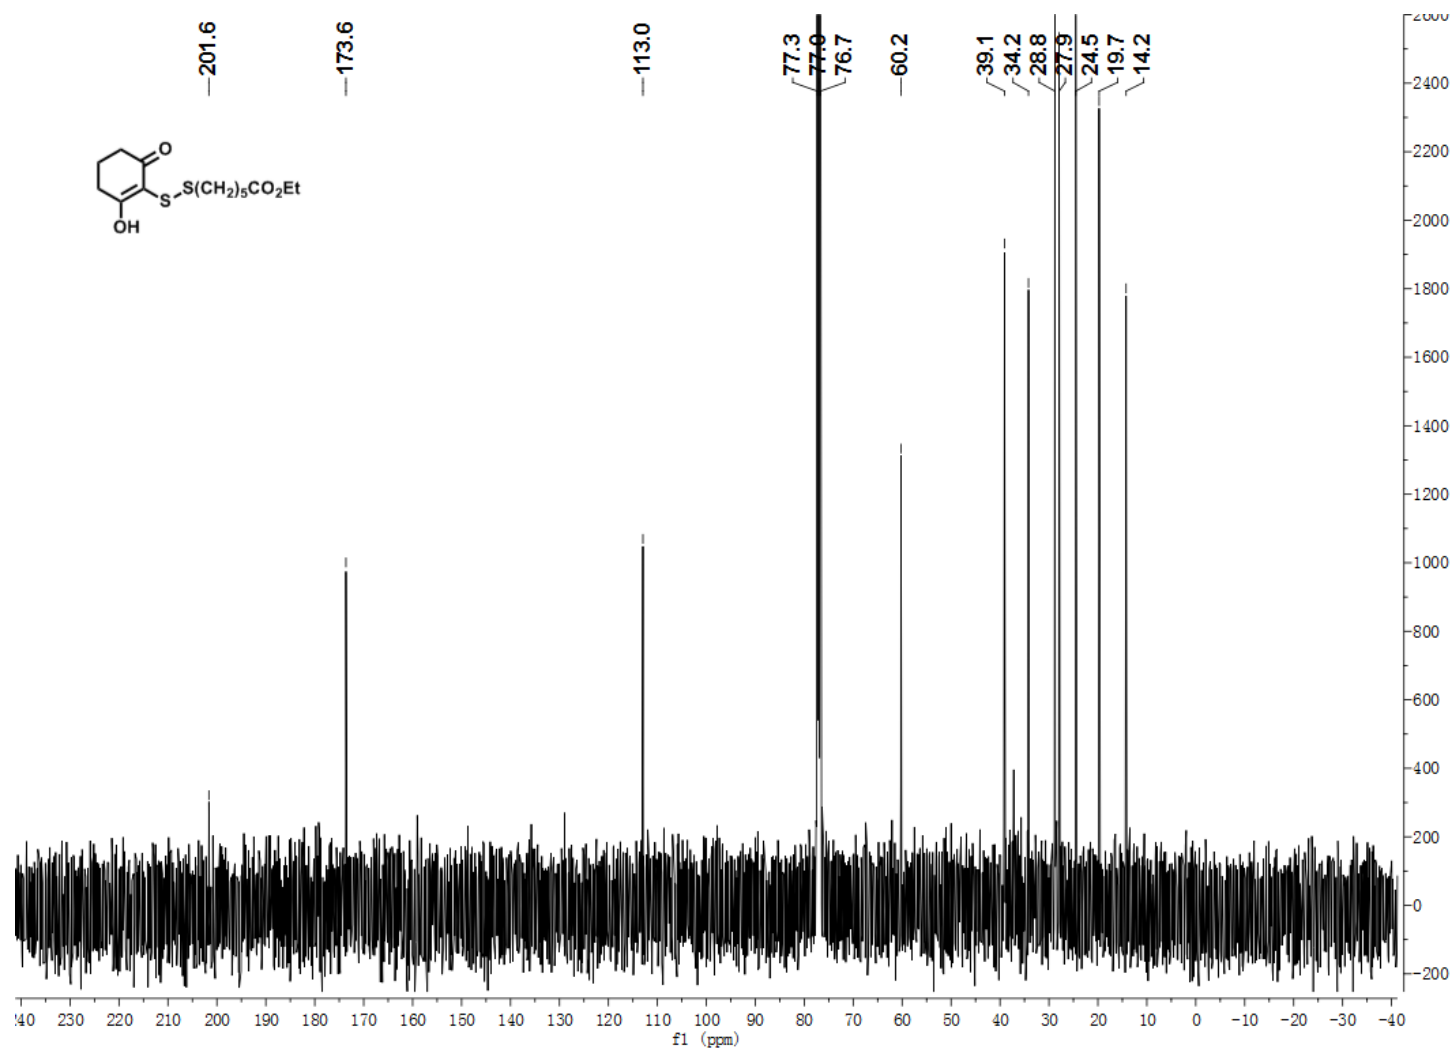

Supplementary Figure 50. <sup>13</sup>C NMR spectra for Compound 3c.

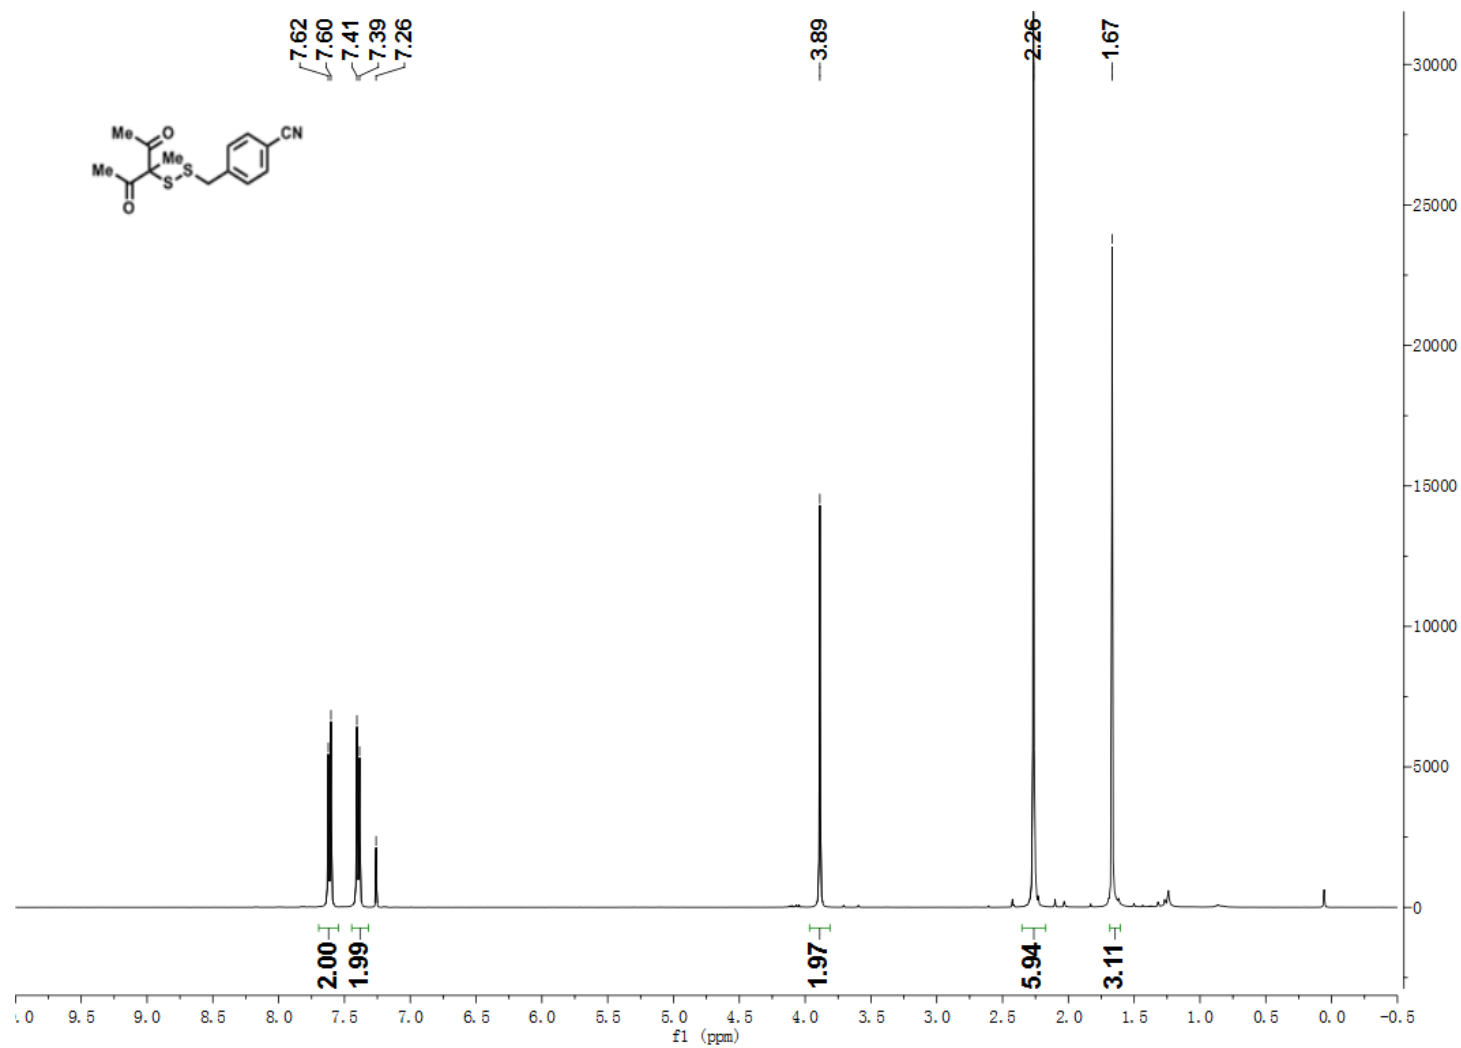

Supplementary Figure 51. <sup>1</sup>H NMR spectra for Compound 3d.

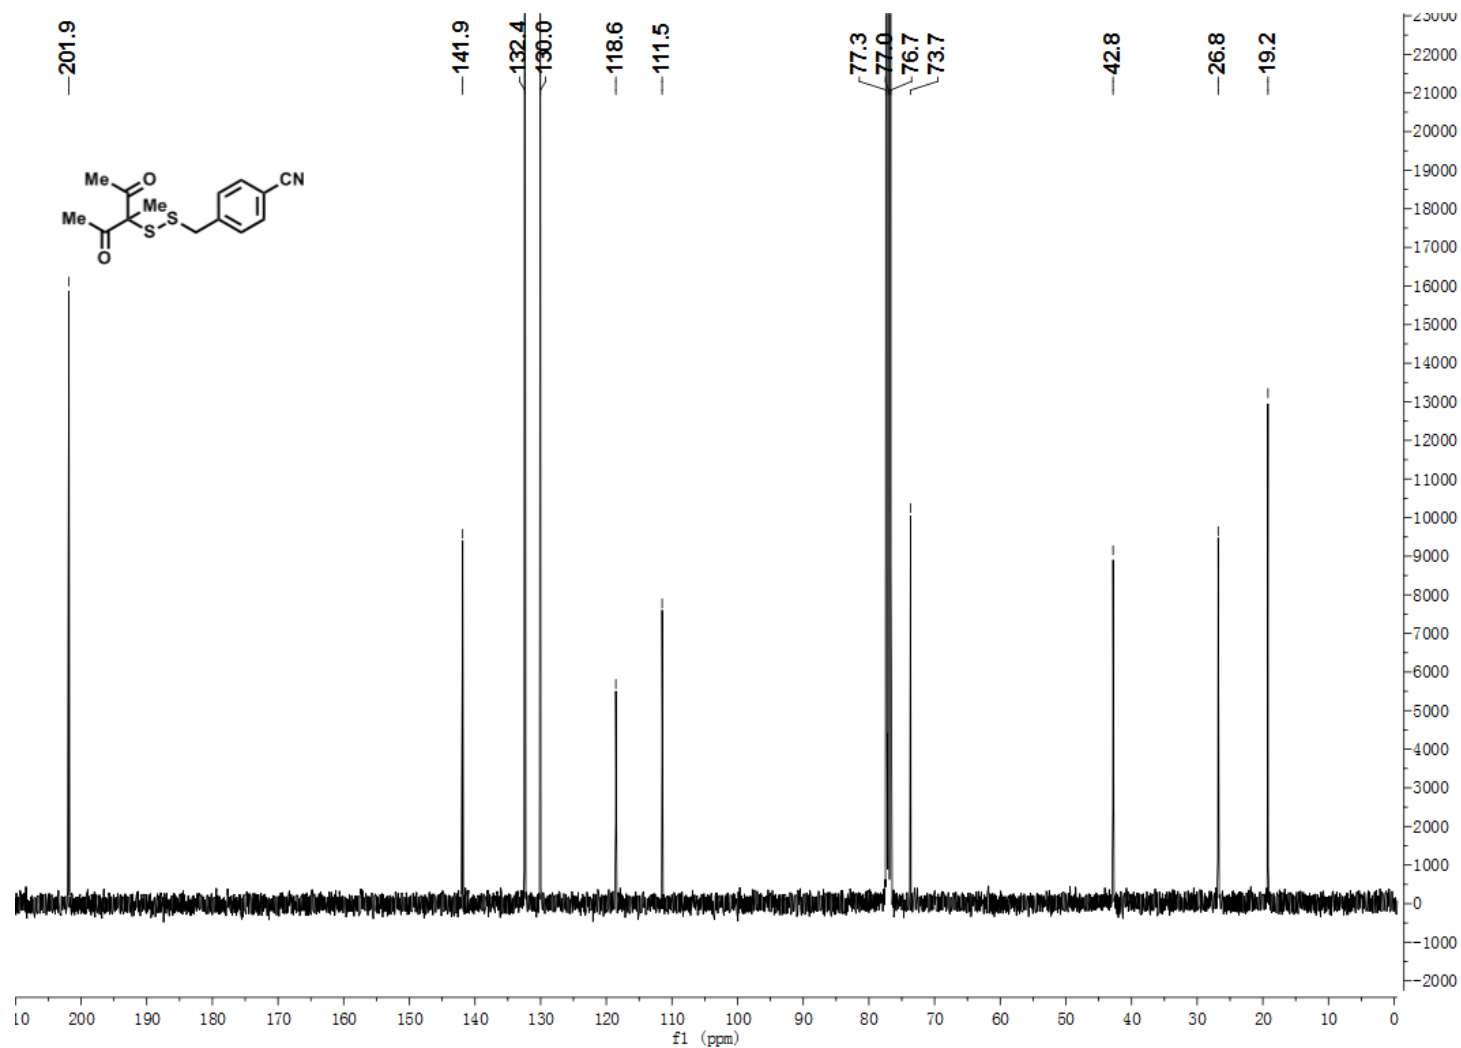

Supplementary Figure 52. <sup>13</sup>C NMR spectra for Compound 3d.

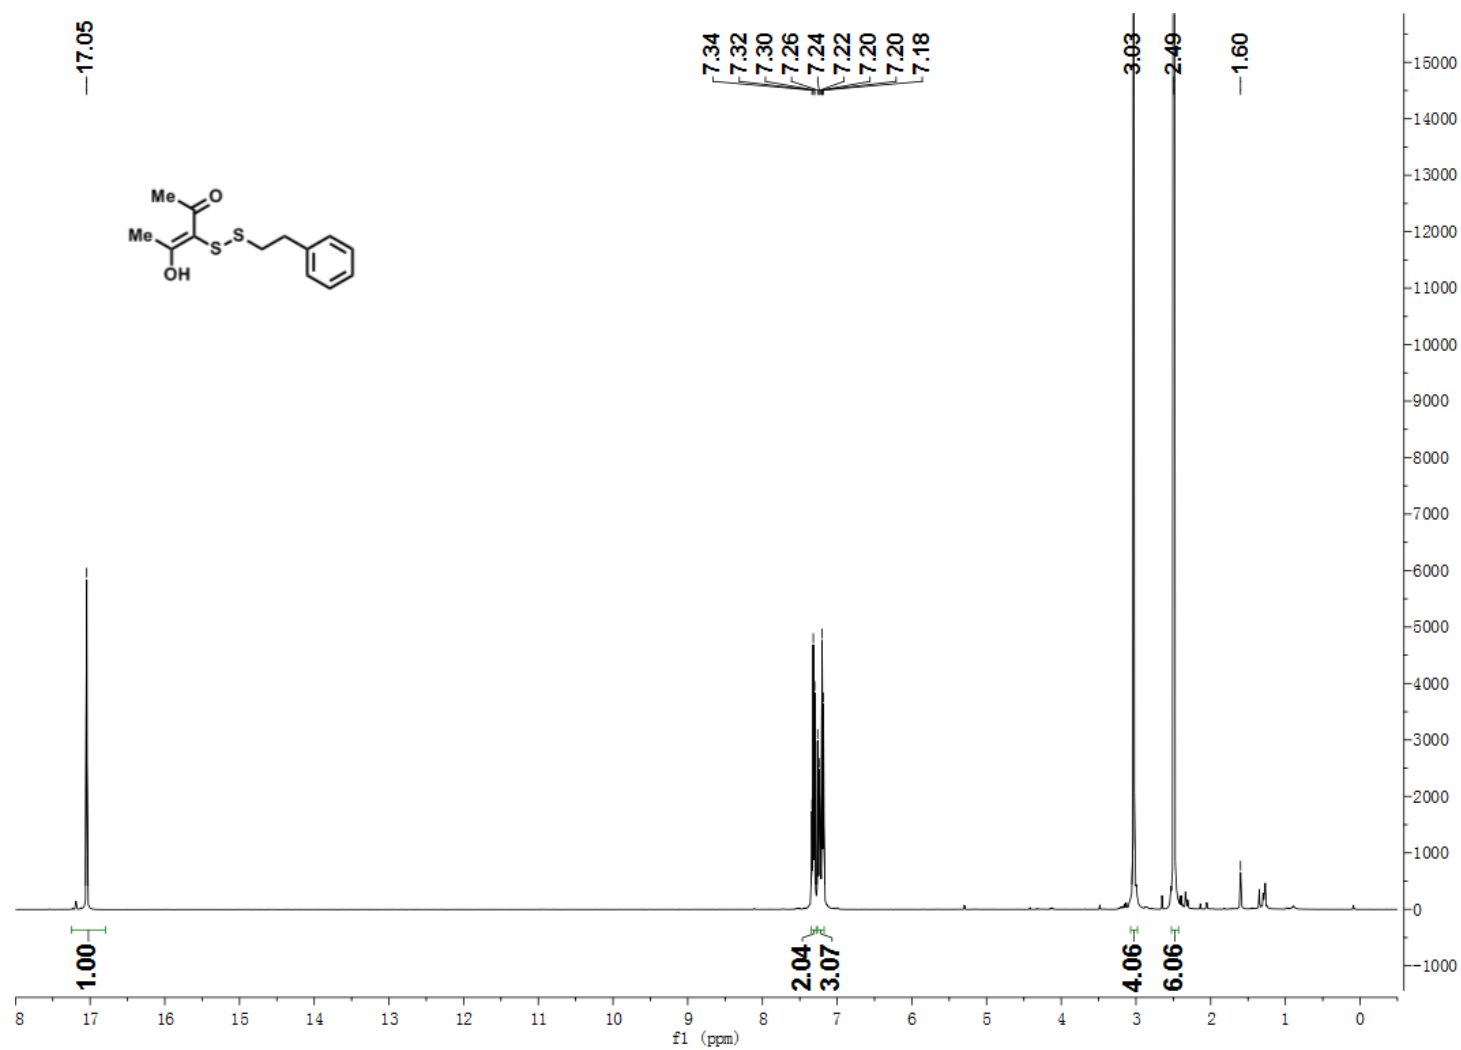

Supplementary Figure 53. <sup>1</sup>H NMR spectra for Compound 3e.

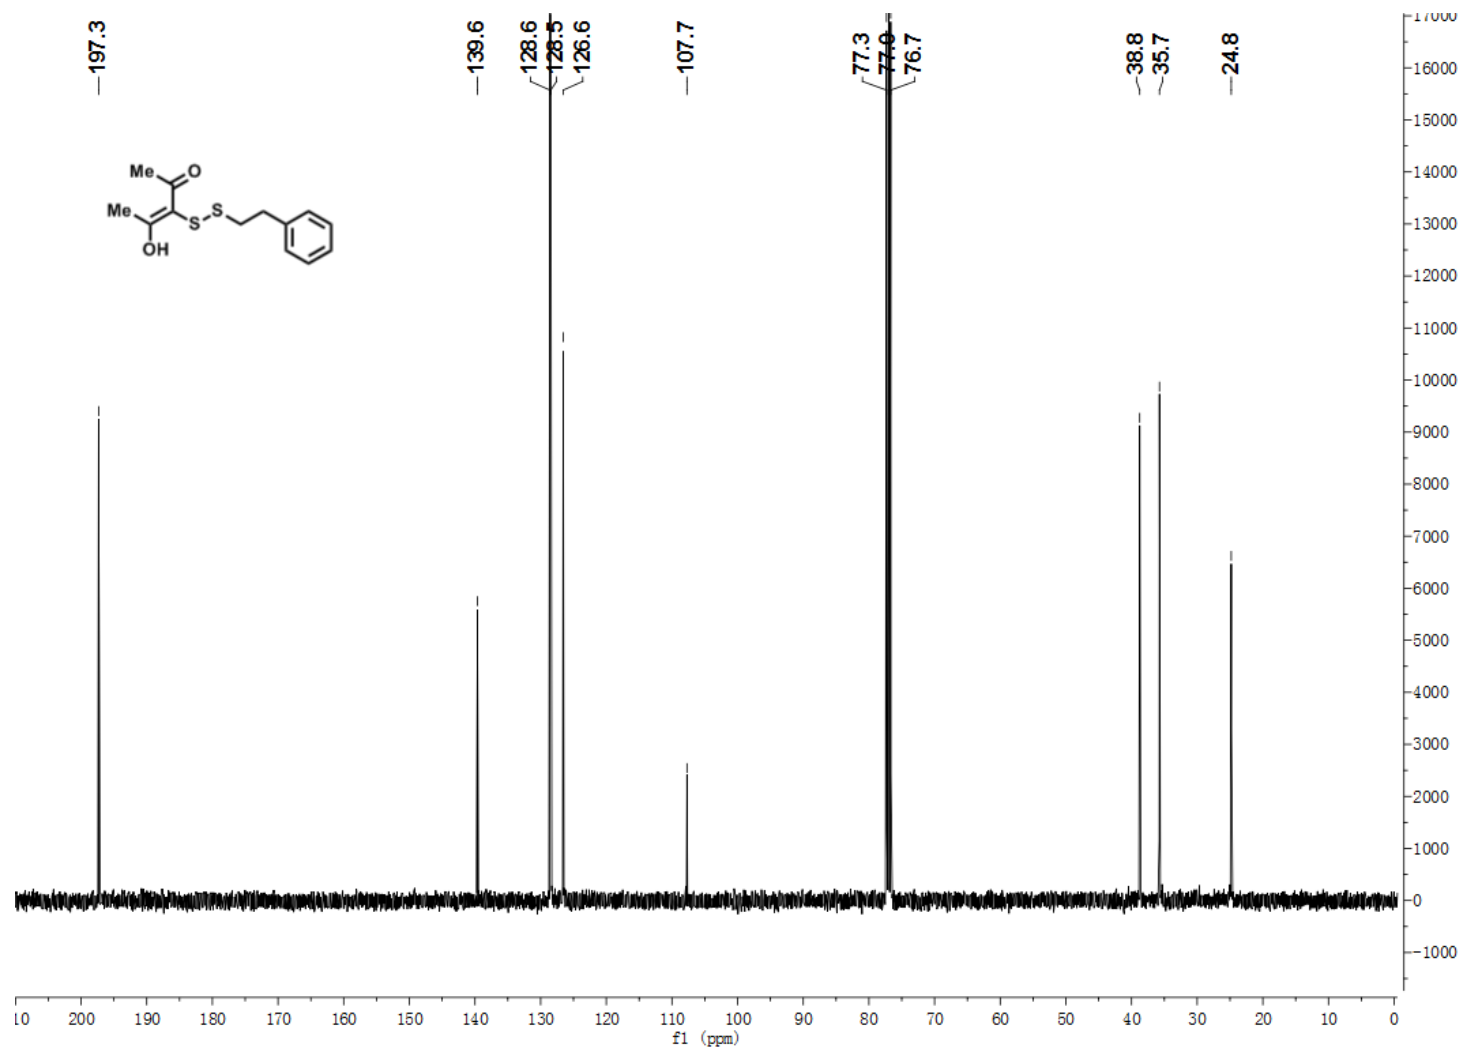

Supplementary Figure 54. <sup>13</sup>C NMR spectra for Compound 3e.

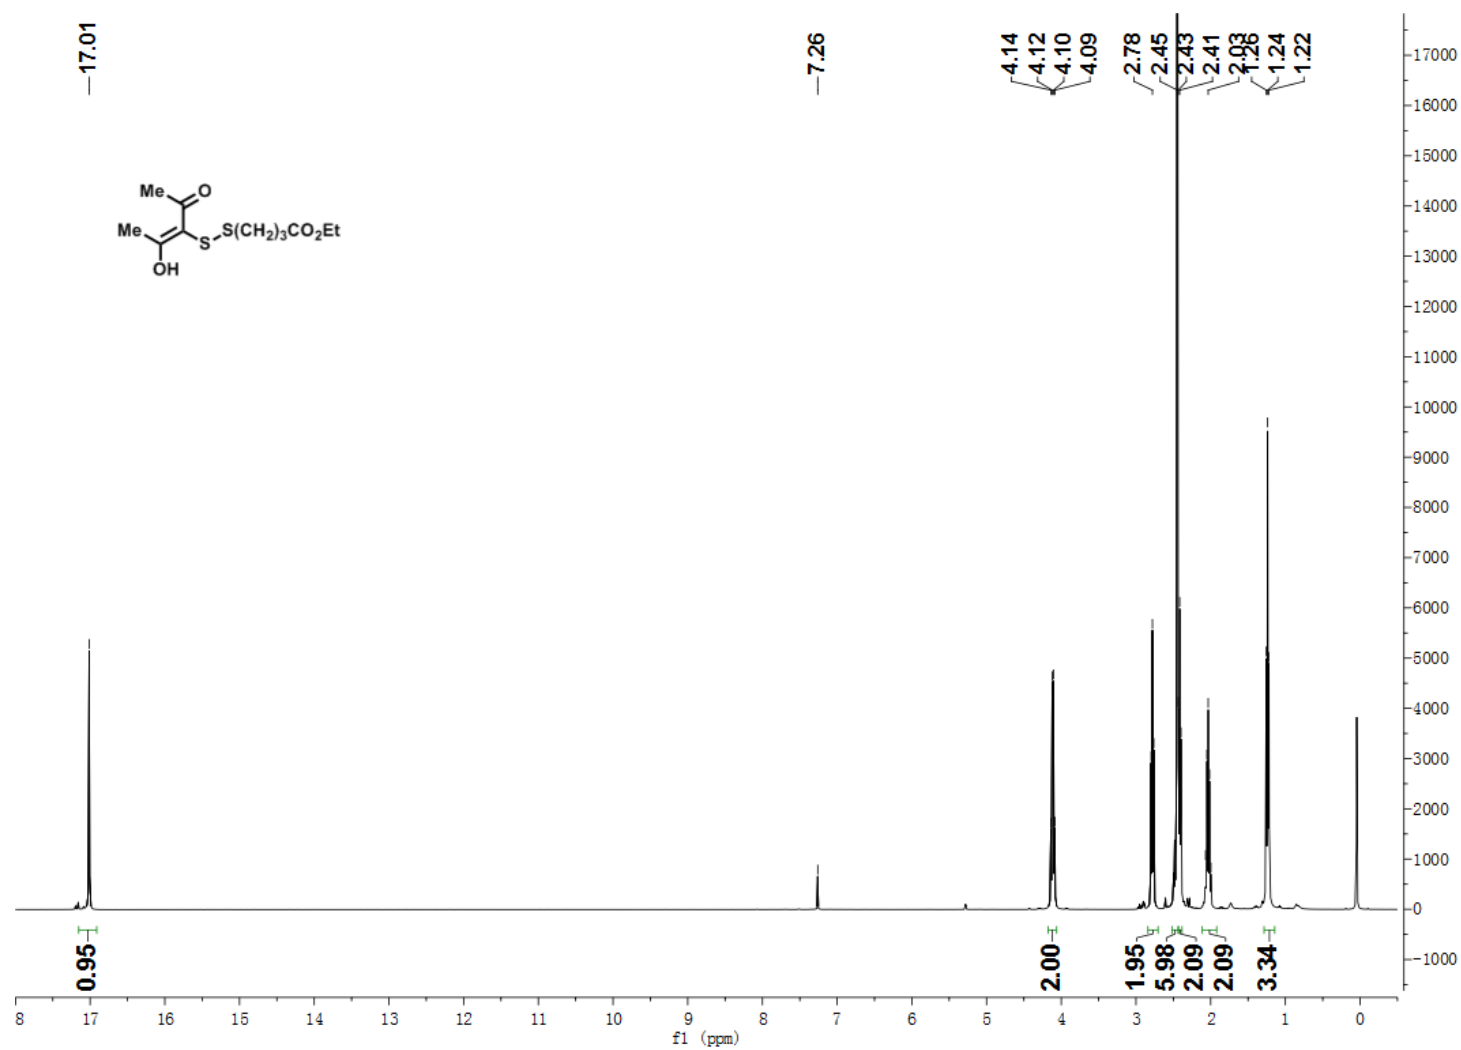

Supplementary Figure 55. <sup>1</sup>H NMR spectra for Compound 3f.

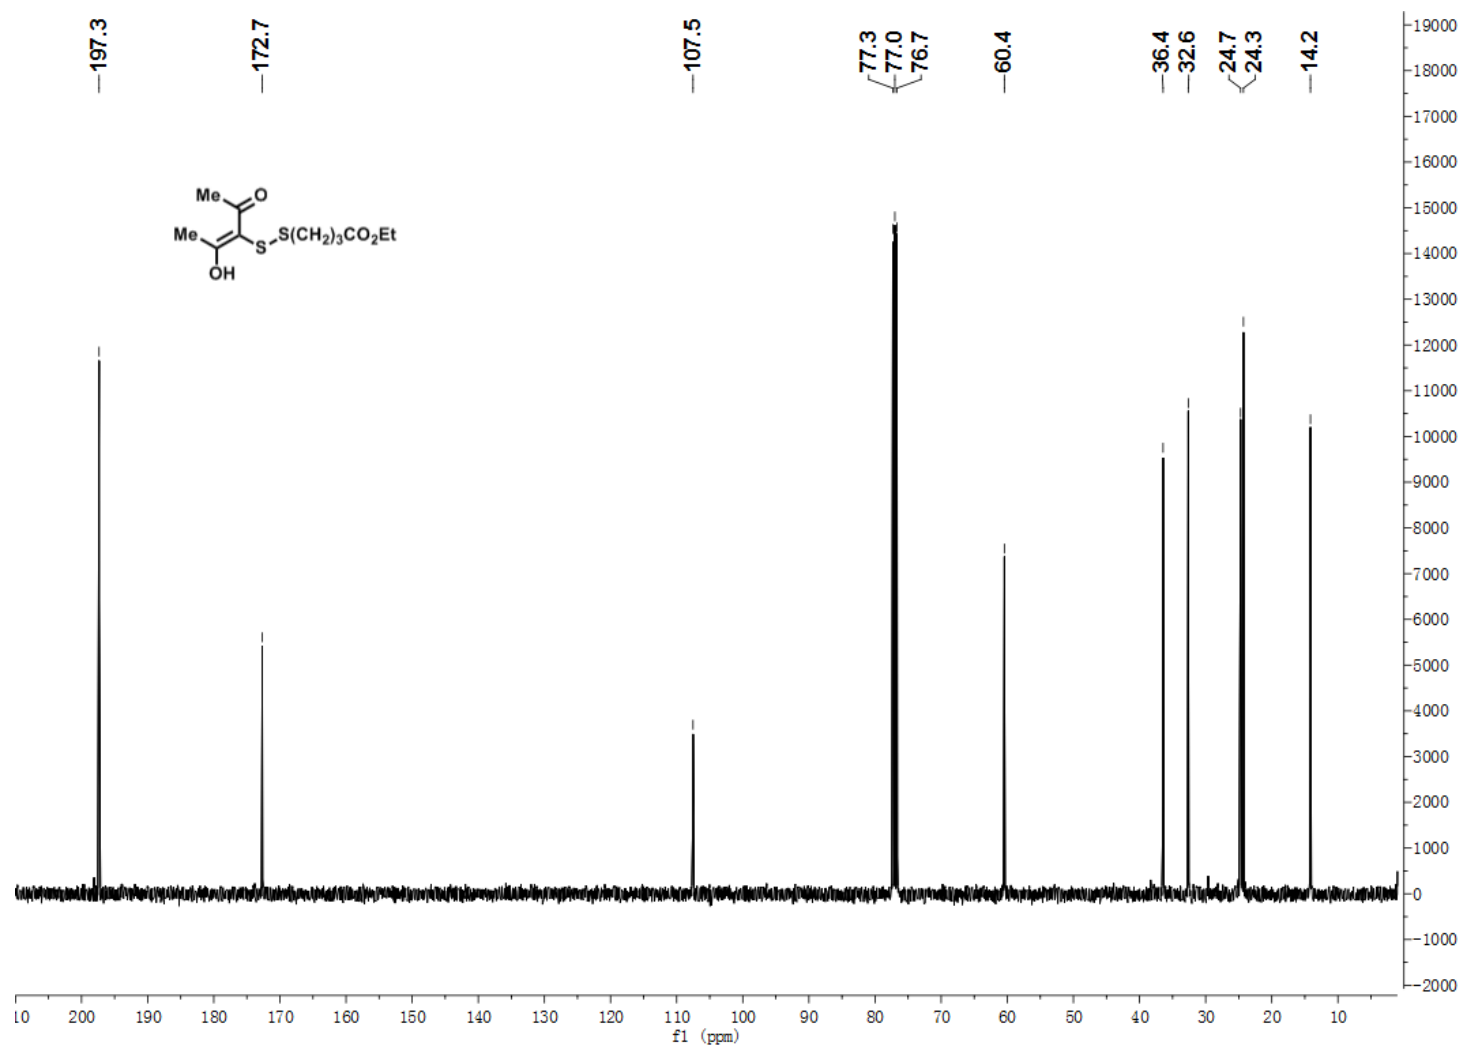

Supplementary Figure 56. <sup>13</sup>C NMR spectra for Compound 3f.

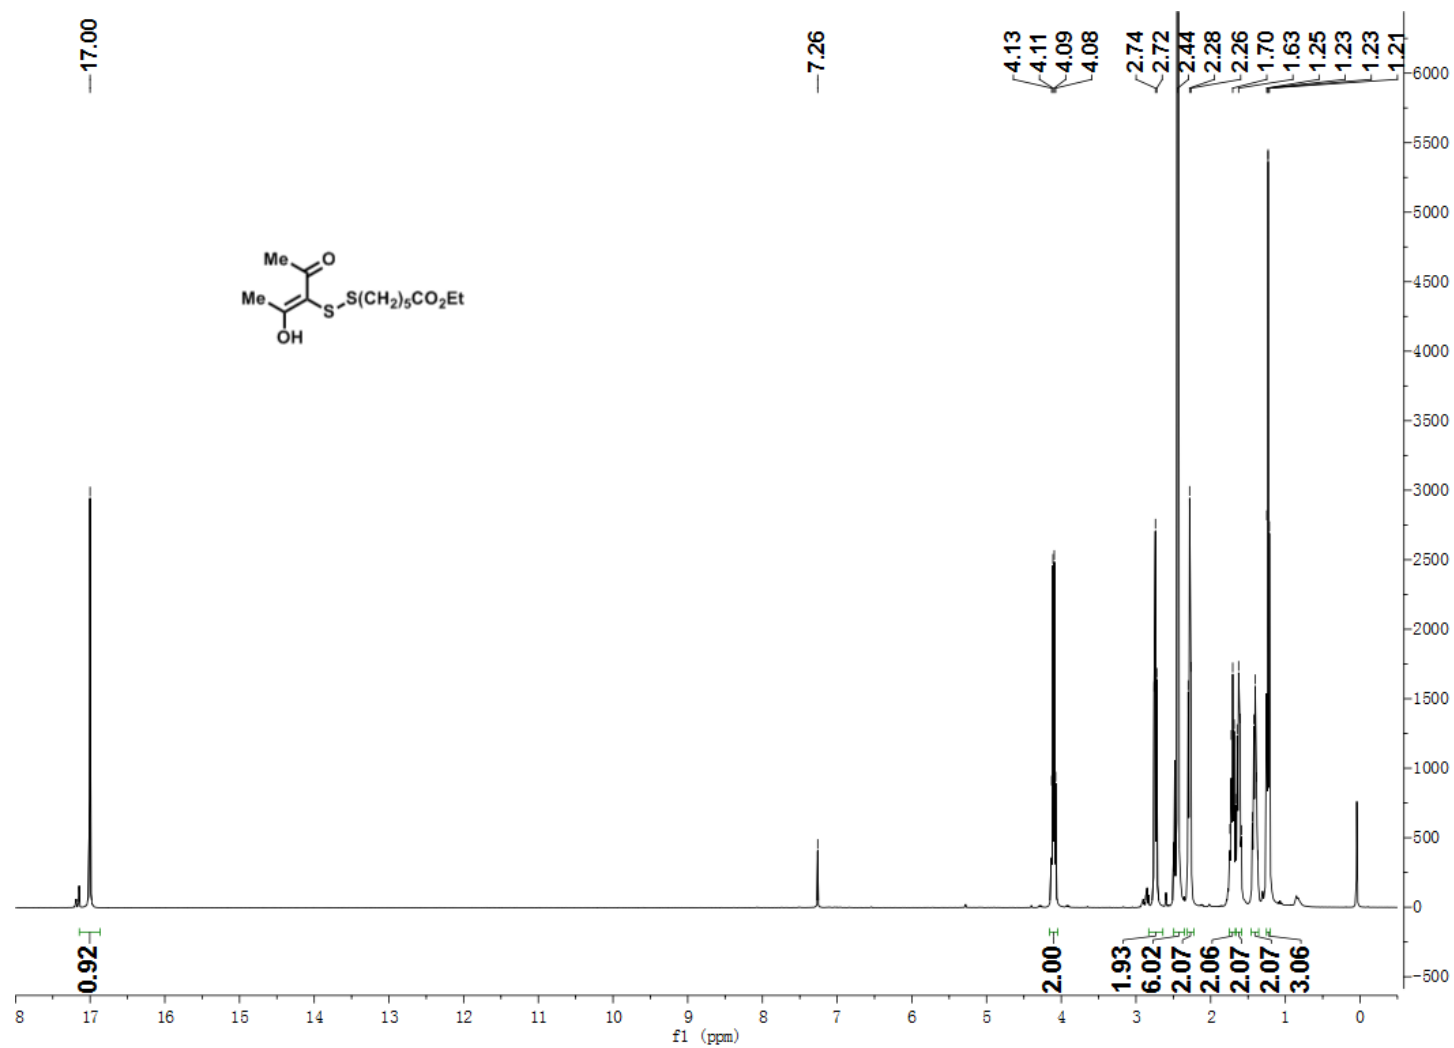

Supplementary Figure 57. <sup>1</sup>H NMR spectra for Compound 3g.

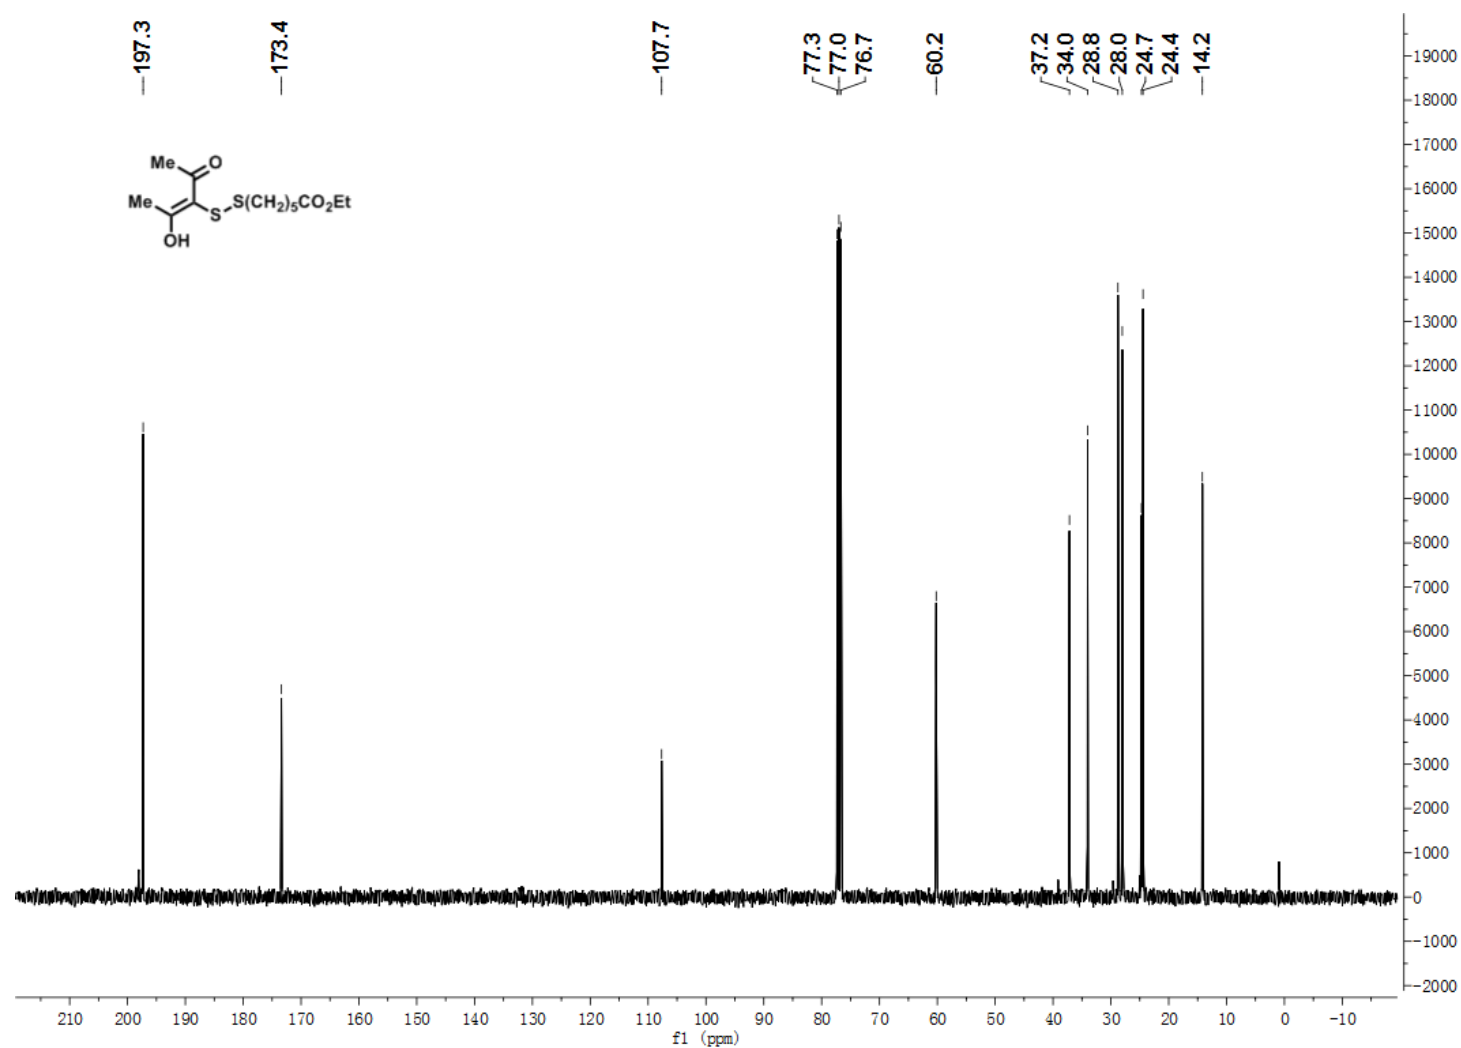

Supplementary Figure 58. <sup>13</sup>C NMR spectra for Compound 3g.

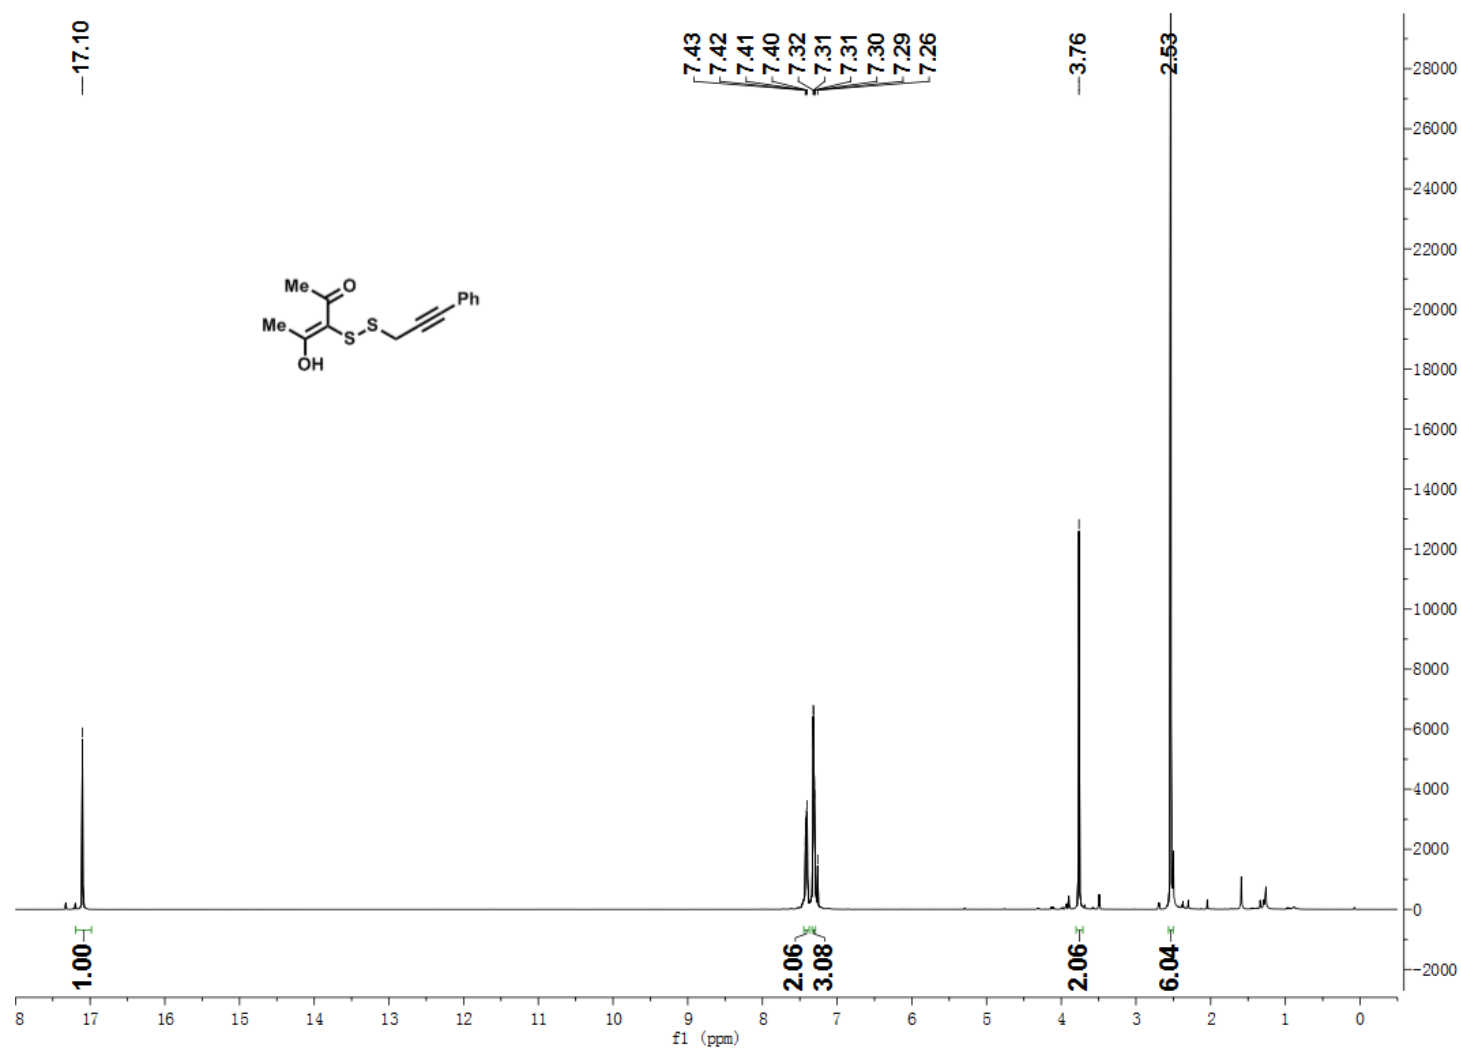

Supplementary Figure 59. <sup>1</sup>H NMR spectra for Compound 3h.

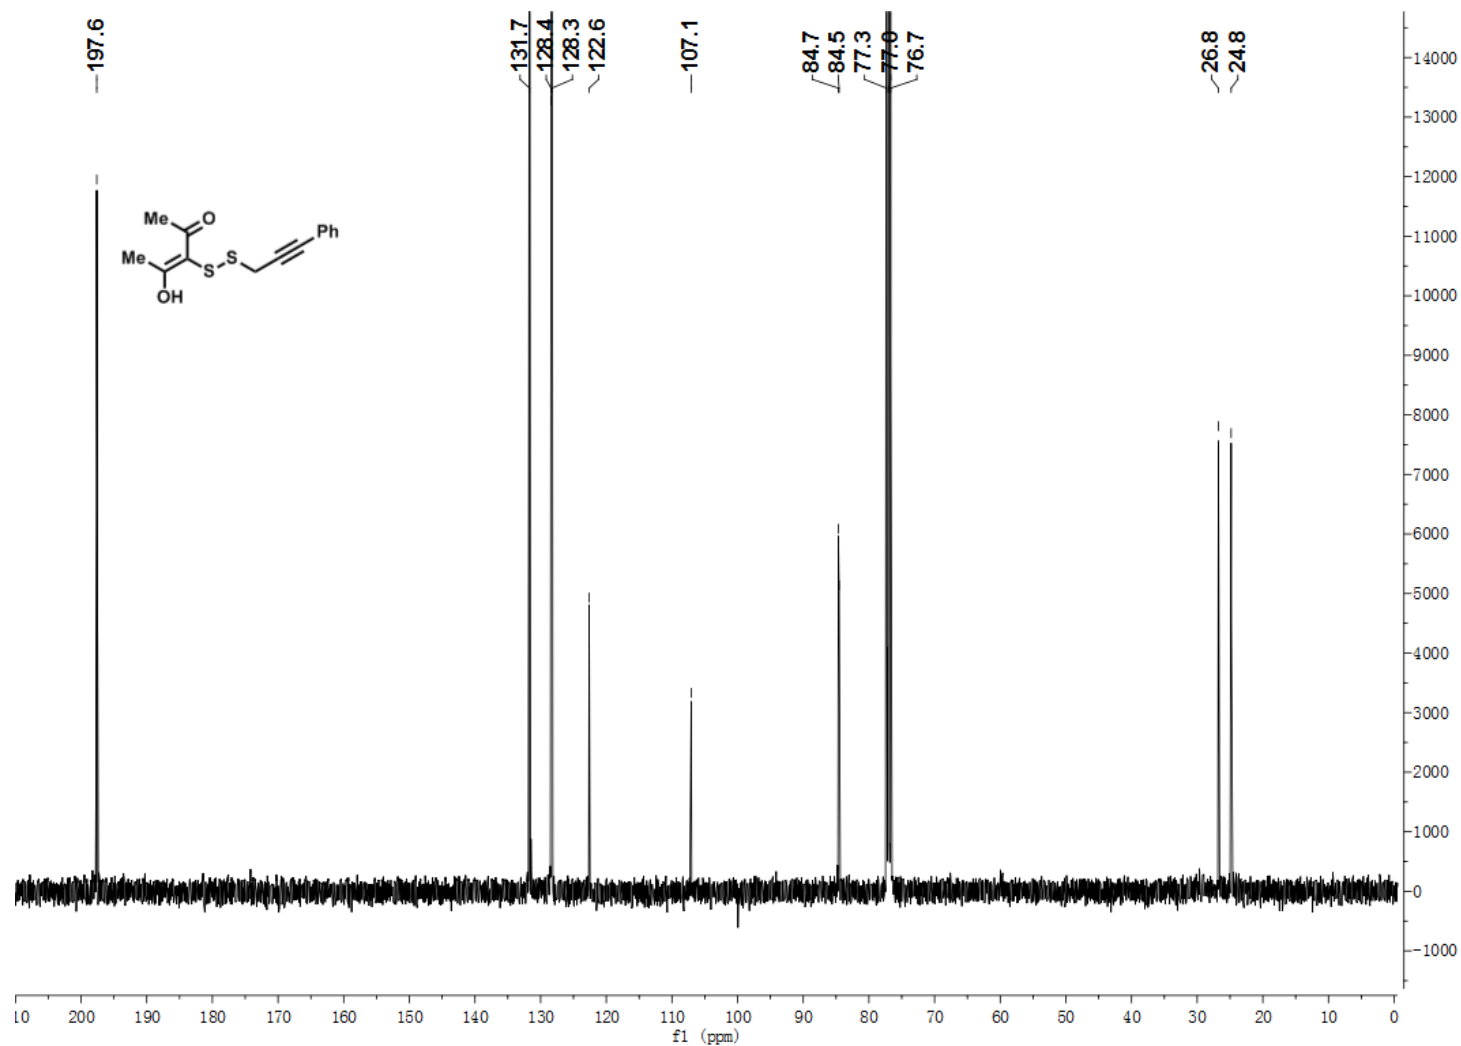

Supplementary Figure 60. <sup>13</sup>C NMR spectra for Compound 3h.

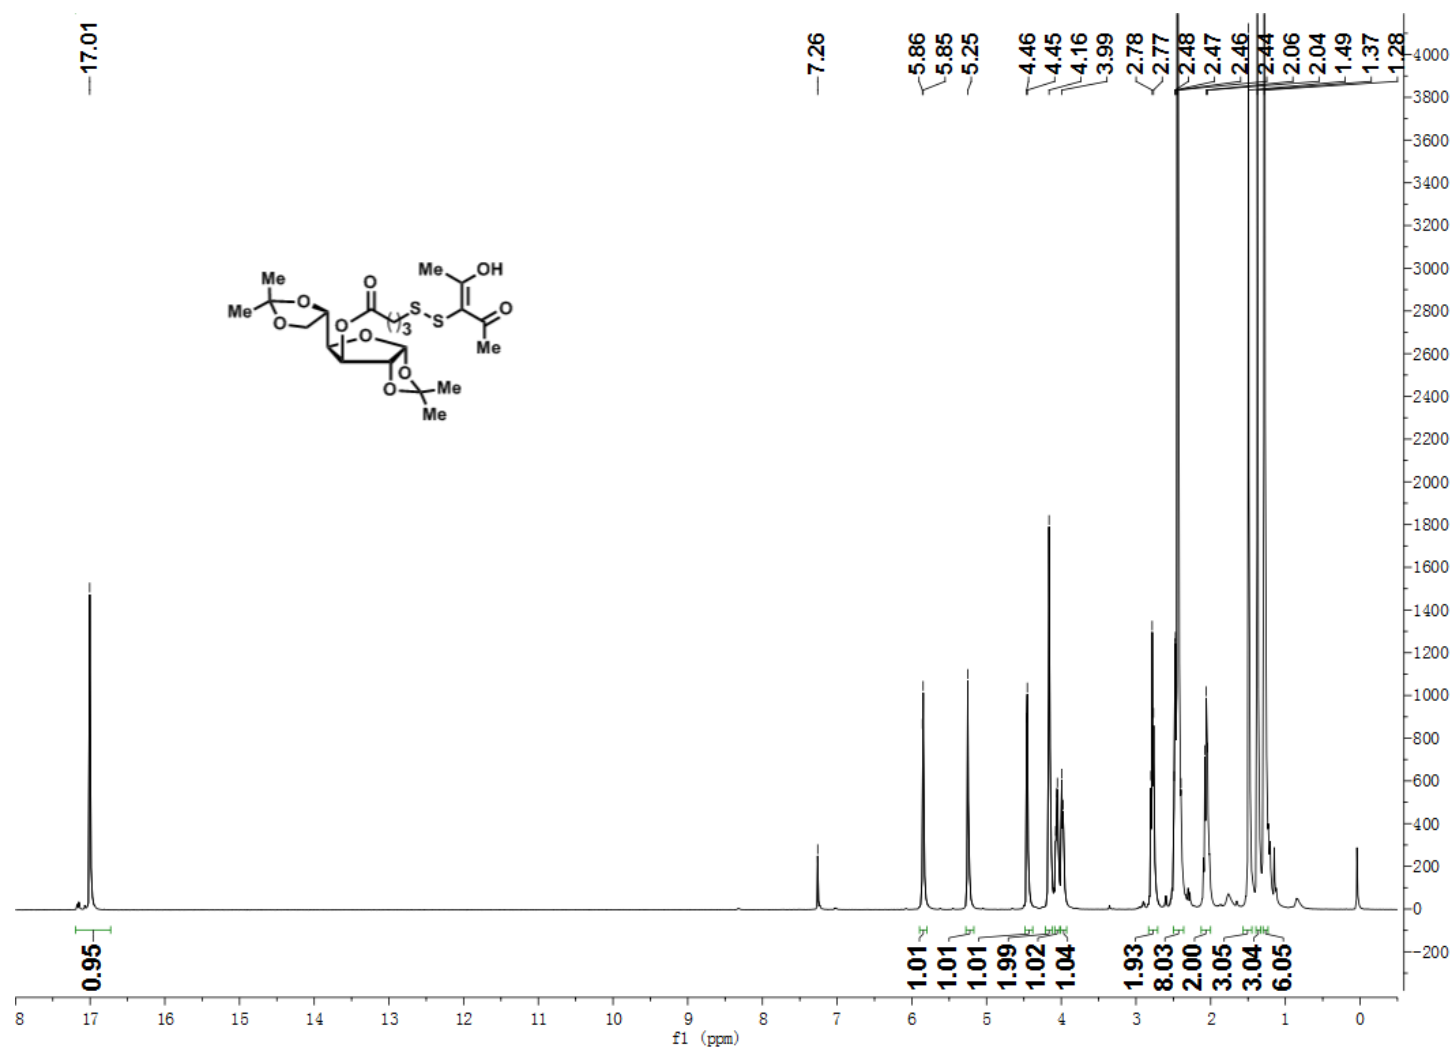

**Supplementary Figure 61.**  $^1\text{H}$  NMR spectra for Compound 3i.



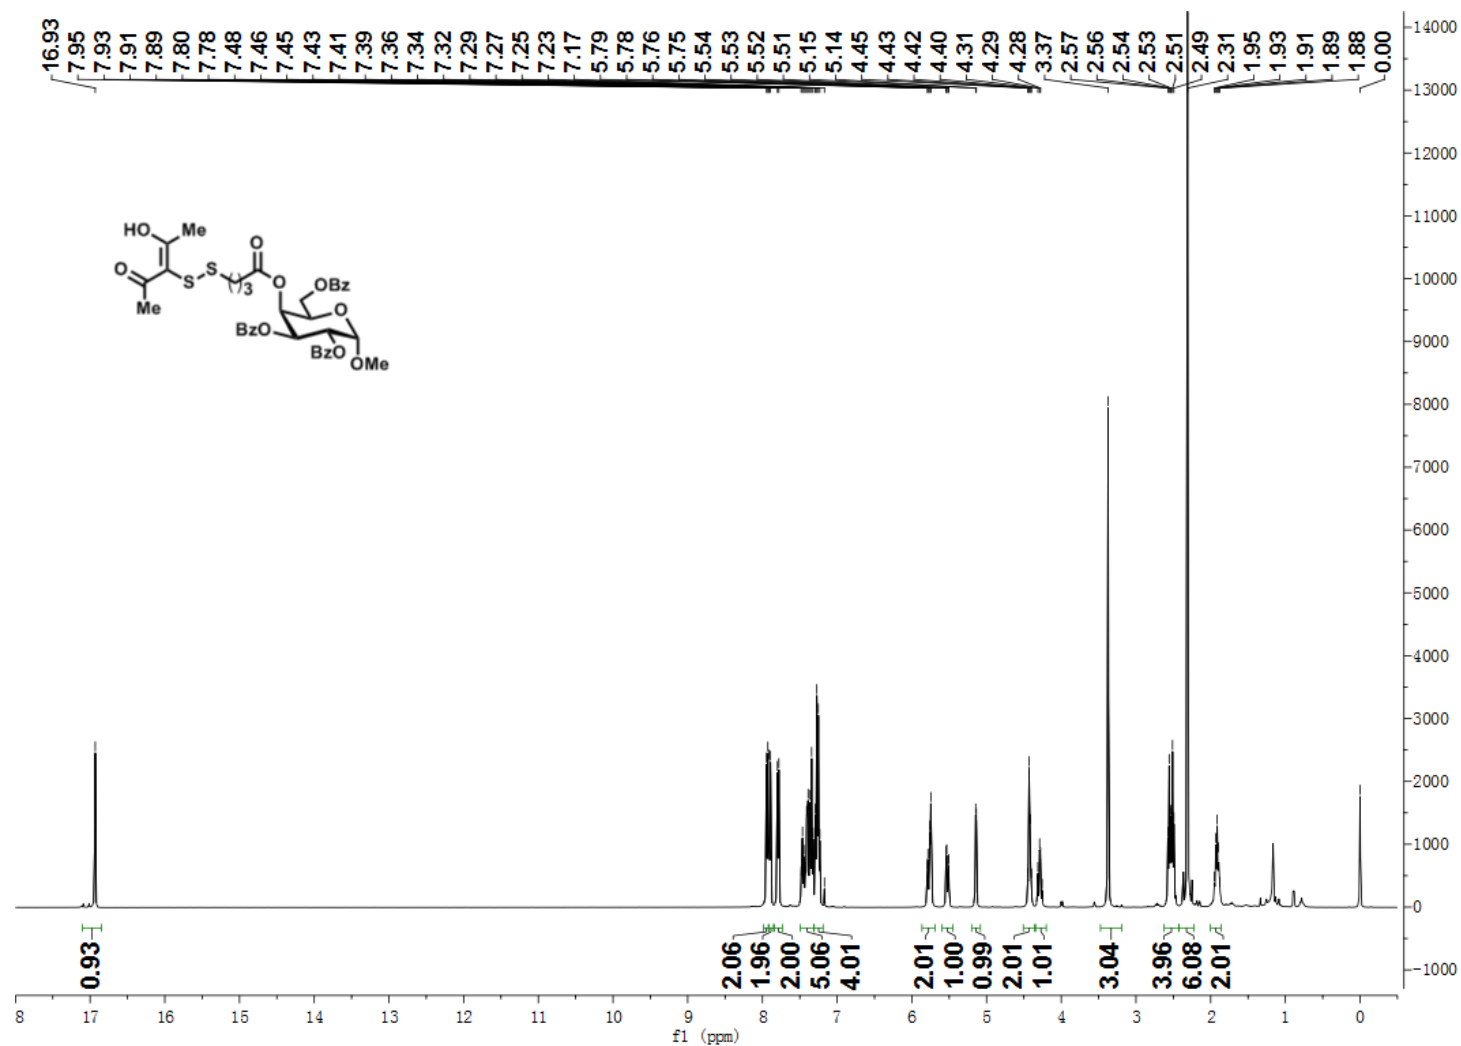

Supplementary Figure 63. <sup>1</sup>H NMR spectra for Compound 3j.

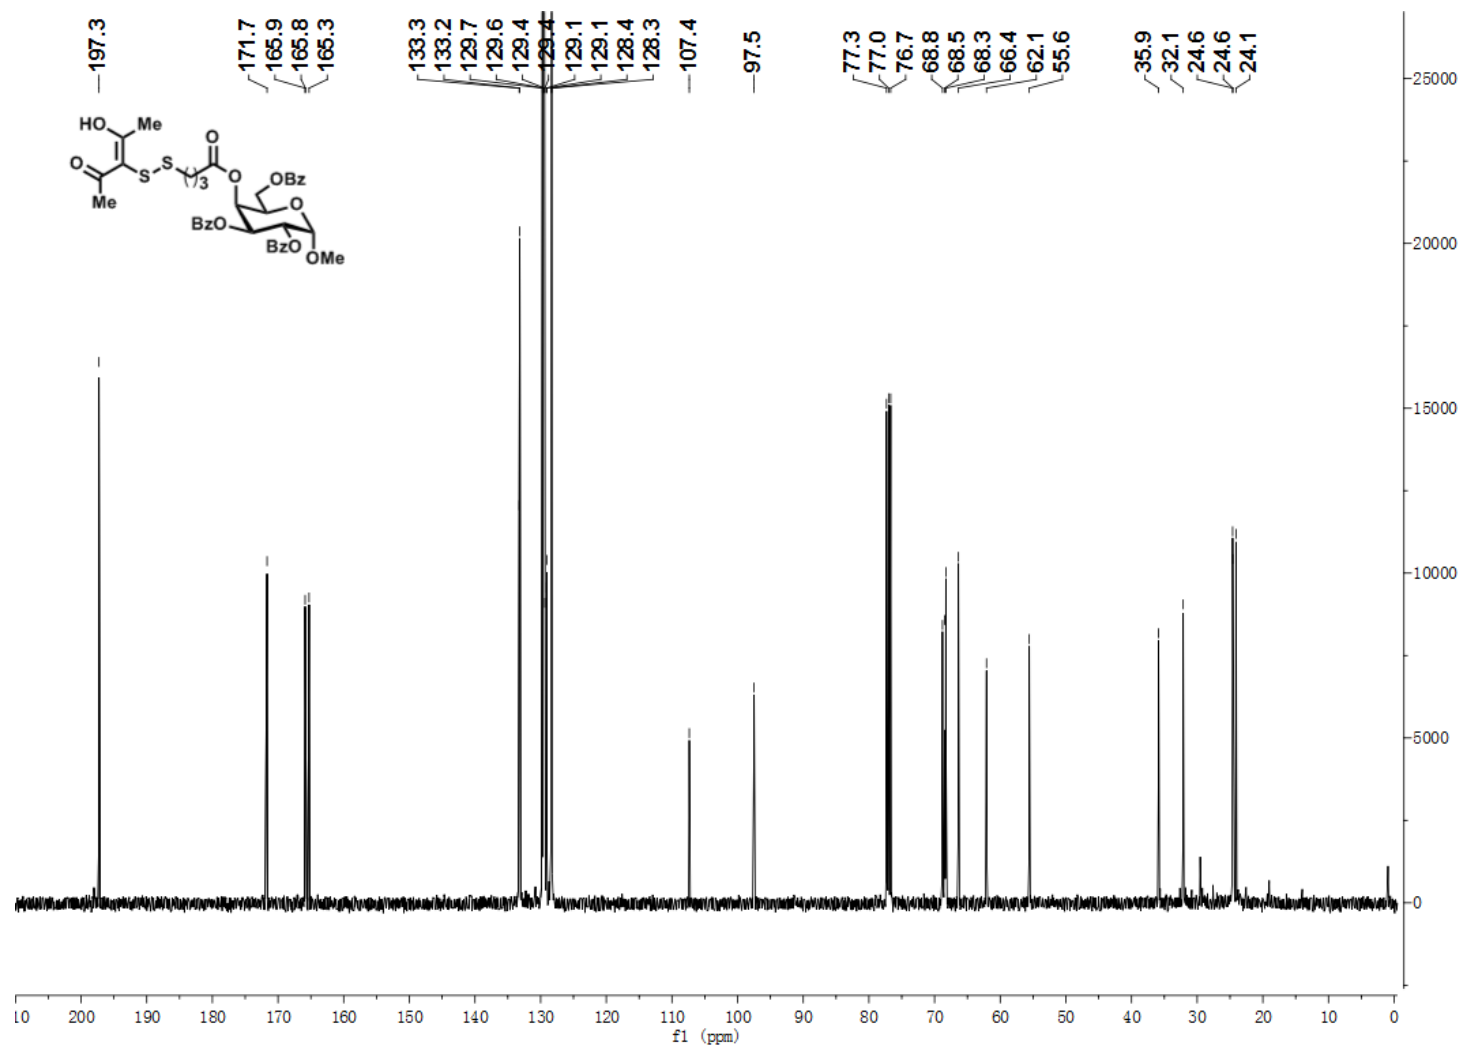

Supplementary Figure 64.  $^{13}\text{C}$  NMR spectra for Compound 3j.

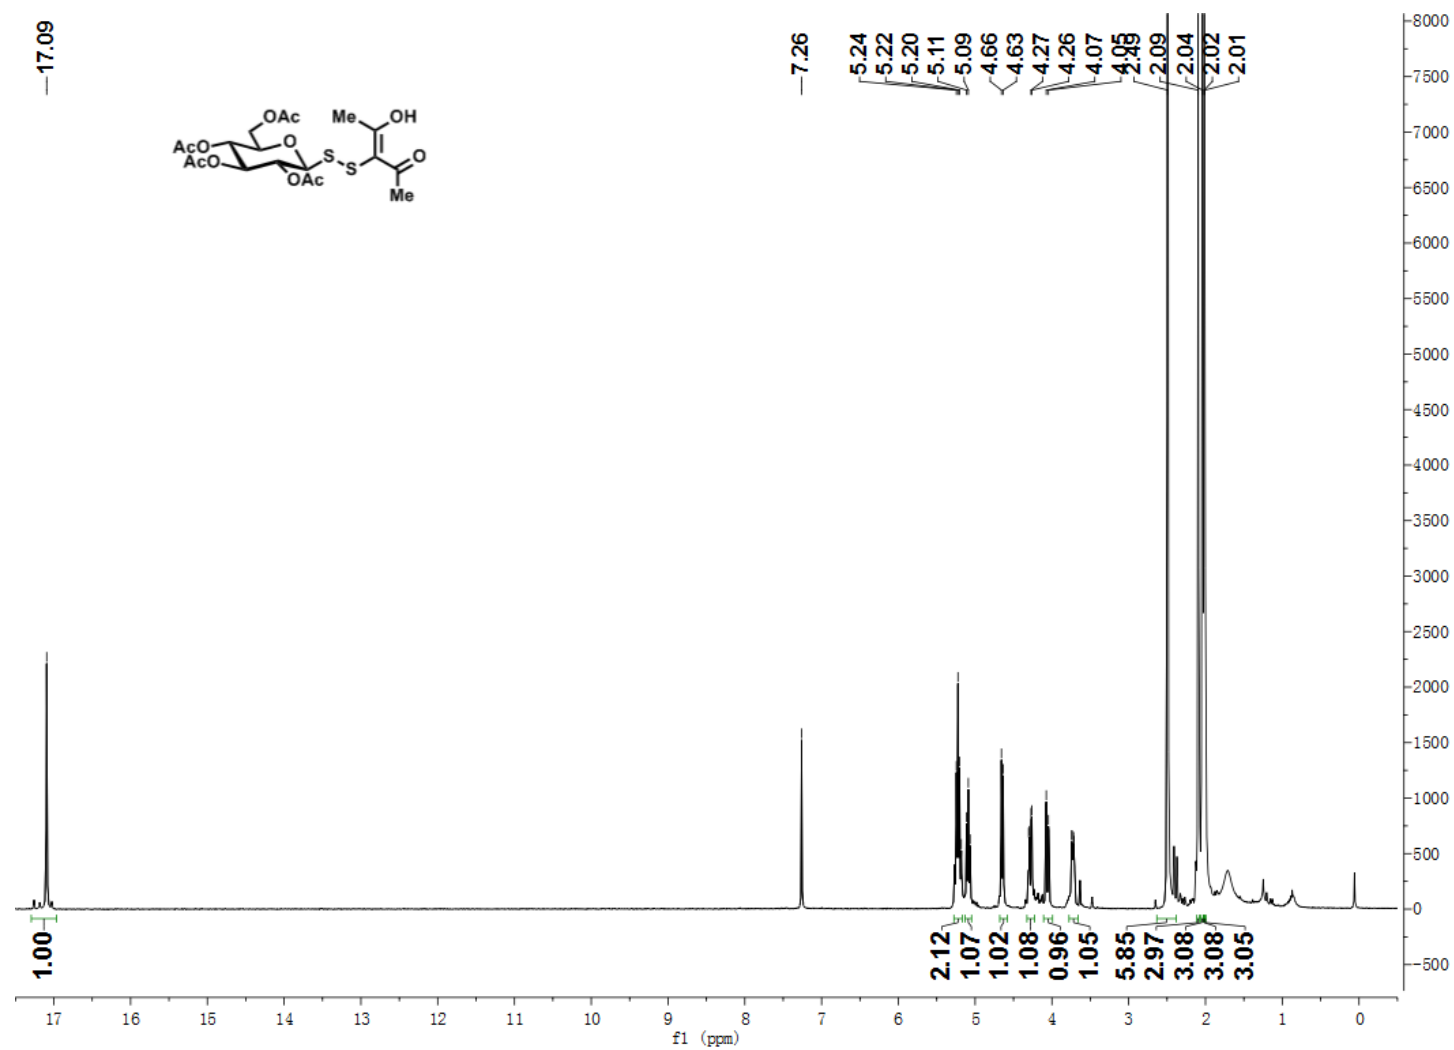

Supplementary Figure 65. <sup>1</sup>H NMR spectra for Compound 3k.

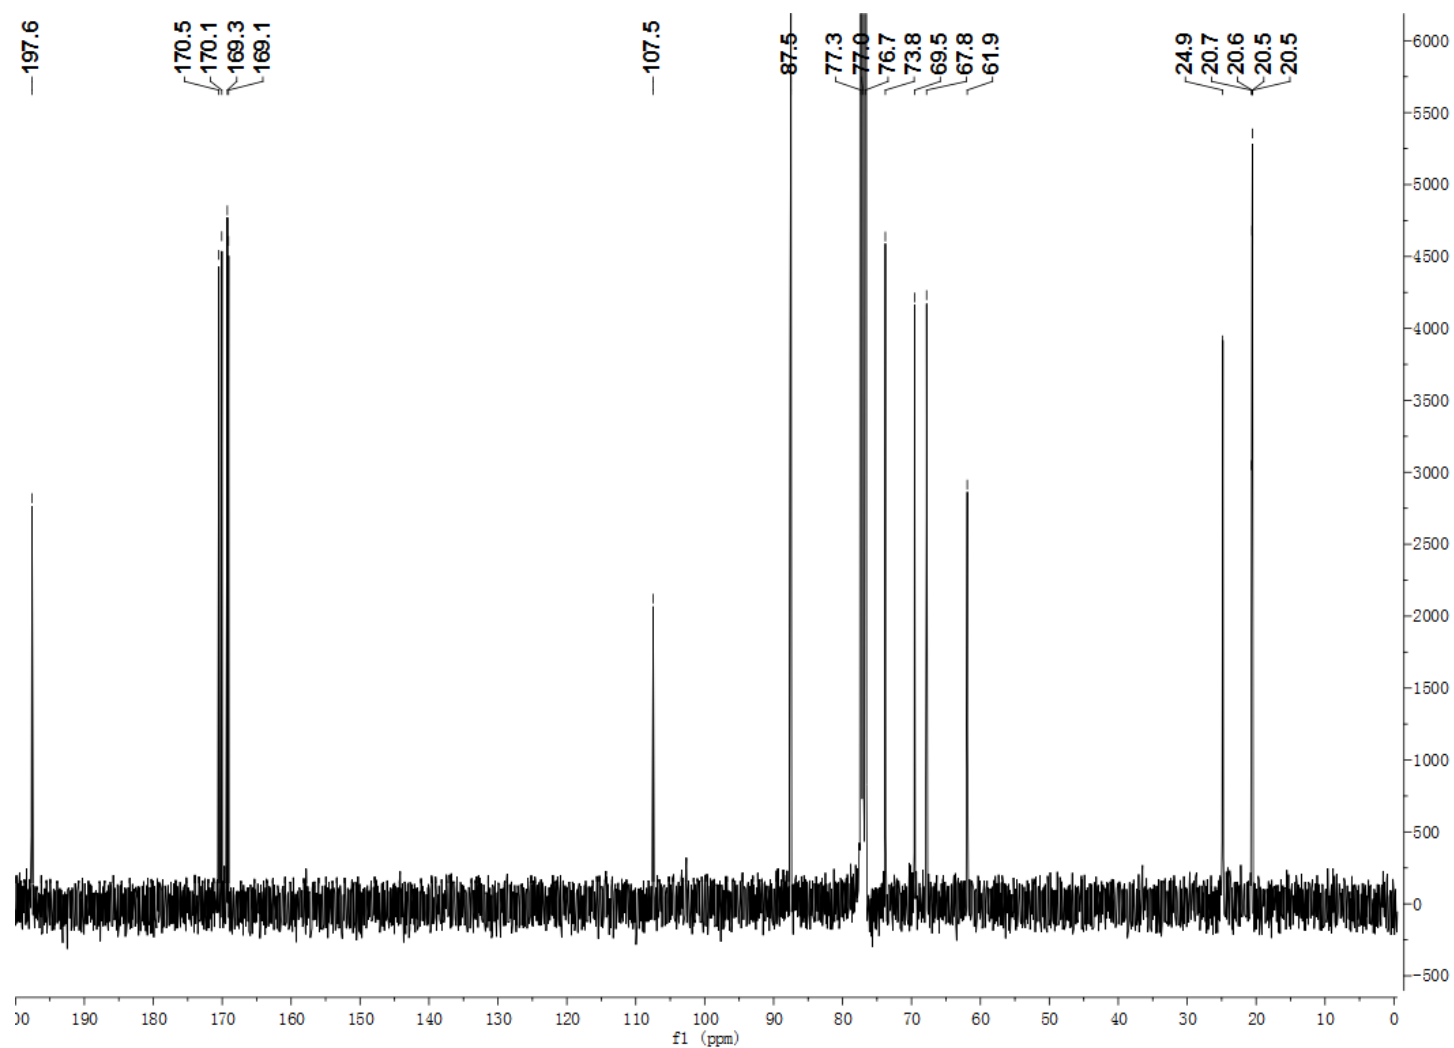

**Supplementary Figure 66.**  $^{13}\text{C}$  NMR spectra for Compound 3k.

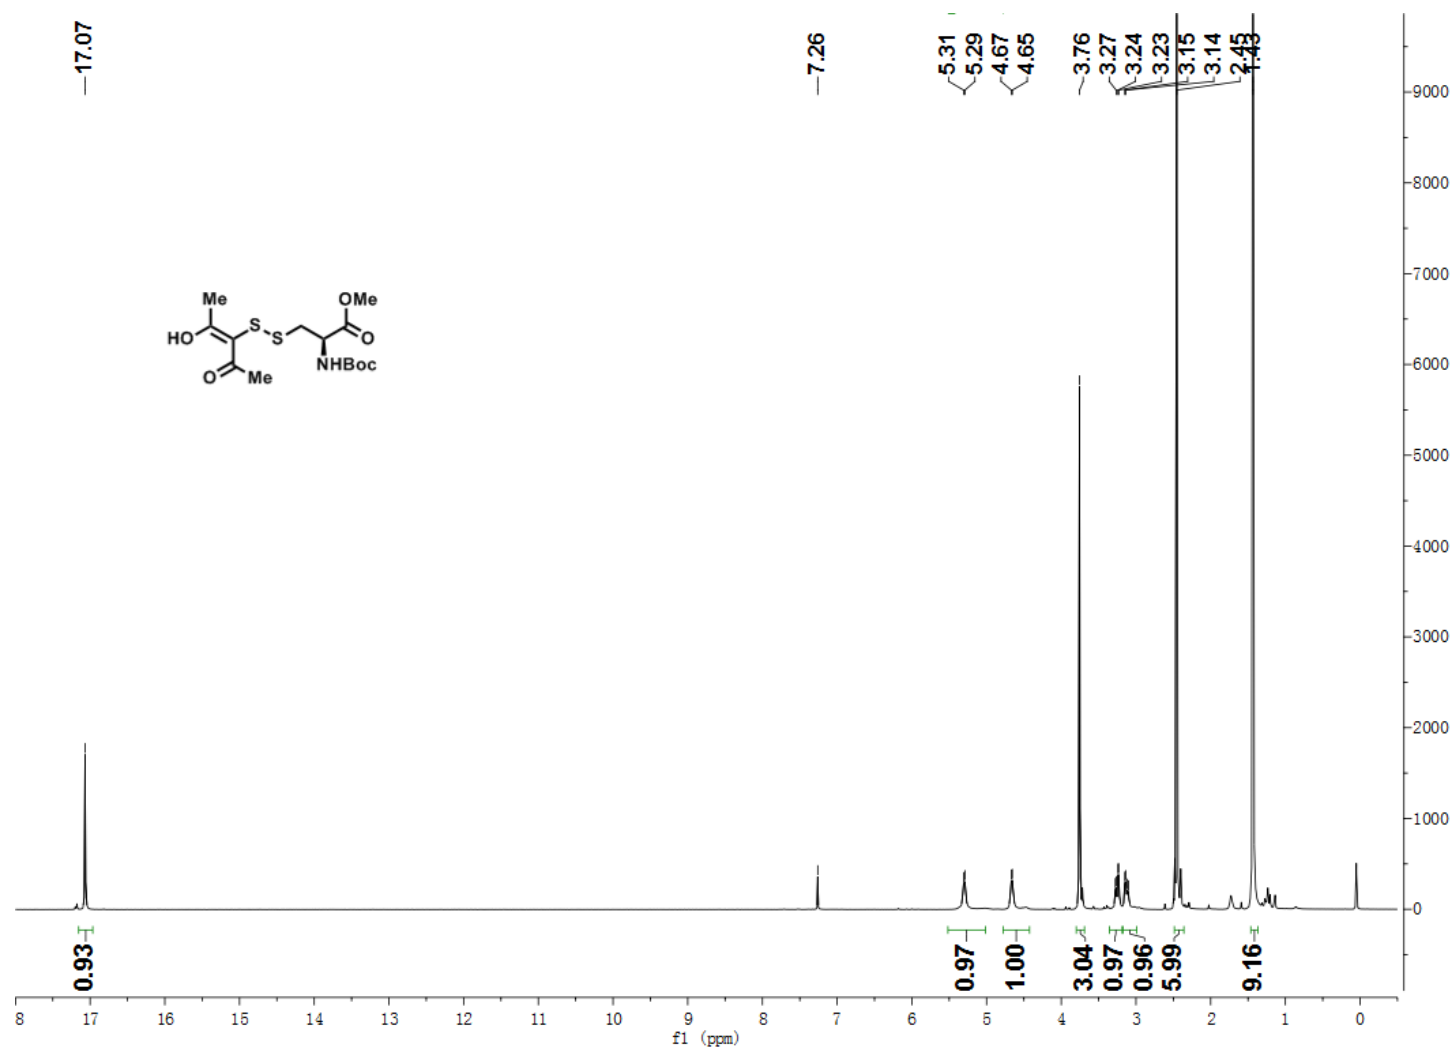

Supplementary Figure 67. <sup>1</sup>H NMR spectra for Compound 3l.

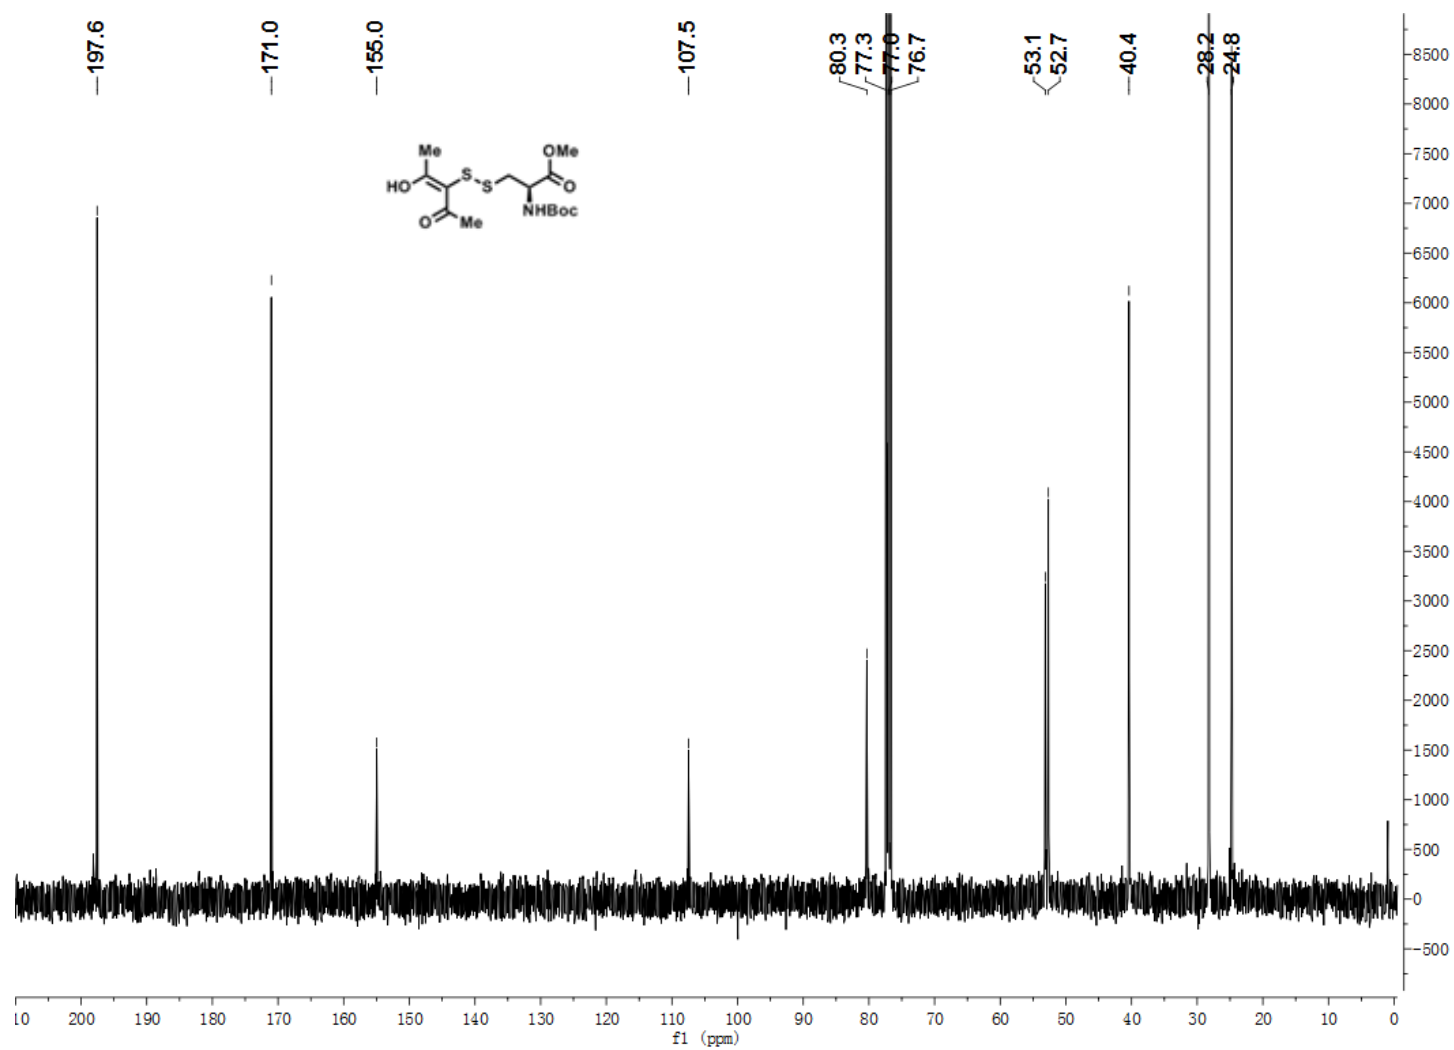

Supplementary Figure 68. <sup>13</sup>C NMR spectra for Compound 31.

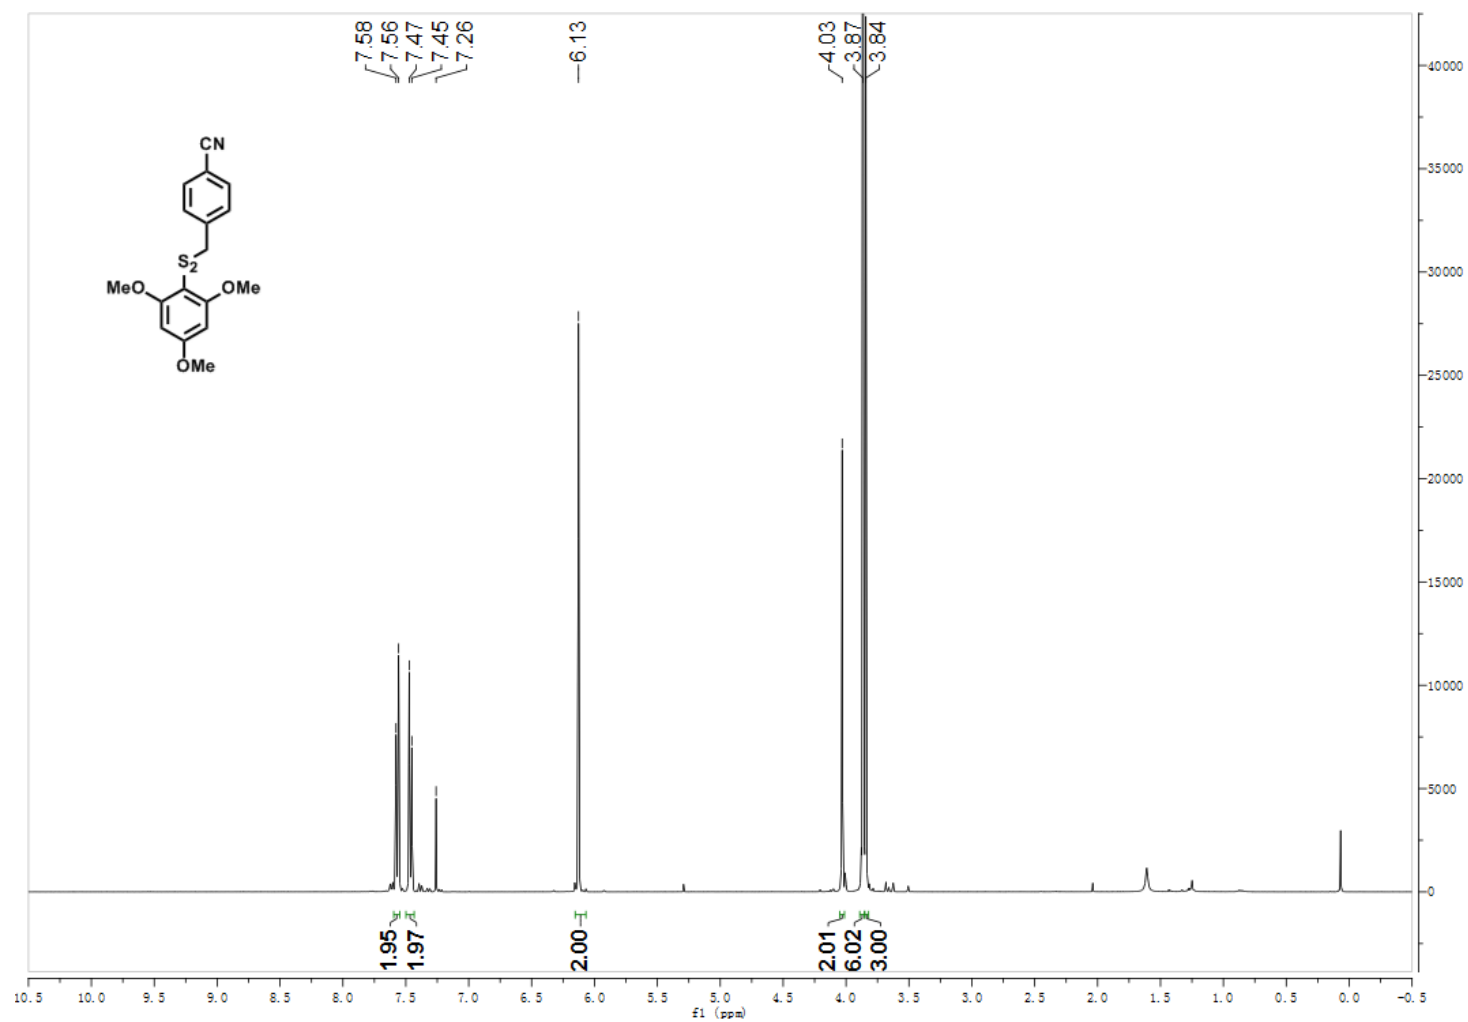

Supplementary Figure 69. <sup>1</sup>H NMR spectra for Compound 4a.

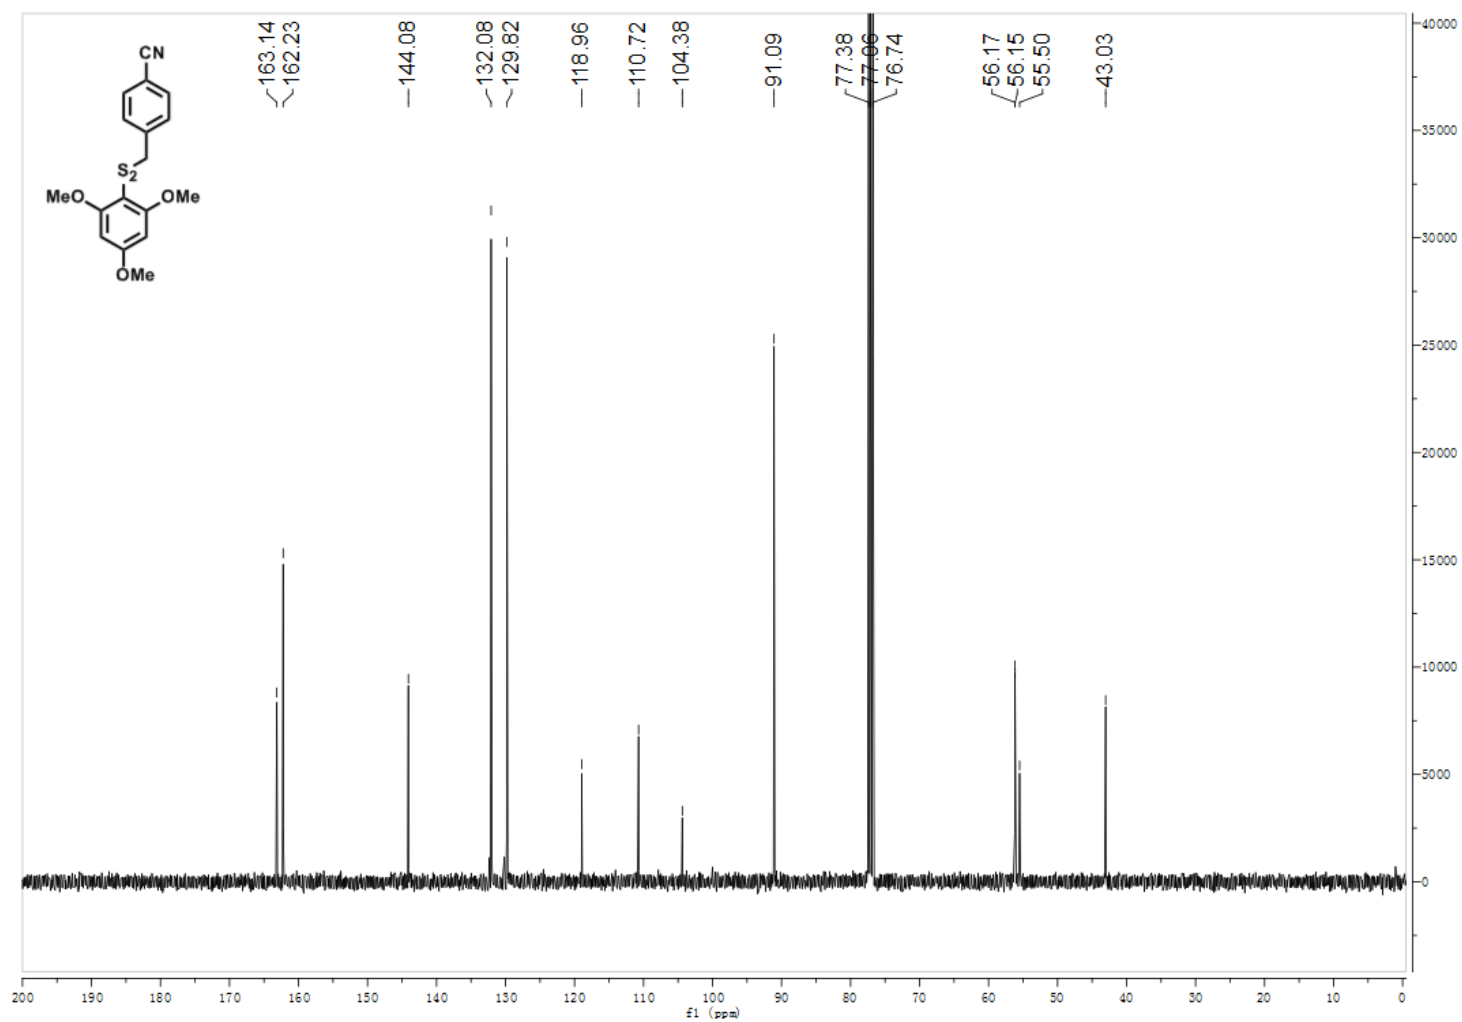

Supplementary Figure 70. <sup>13</sup>C NMR spectra for Compound 4a.

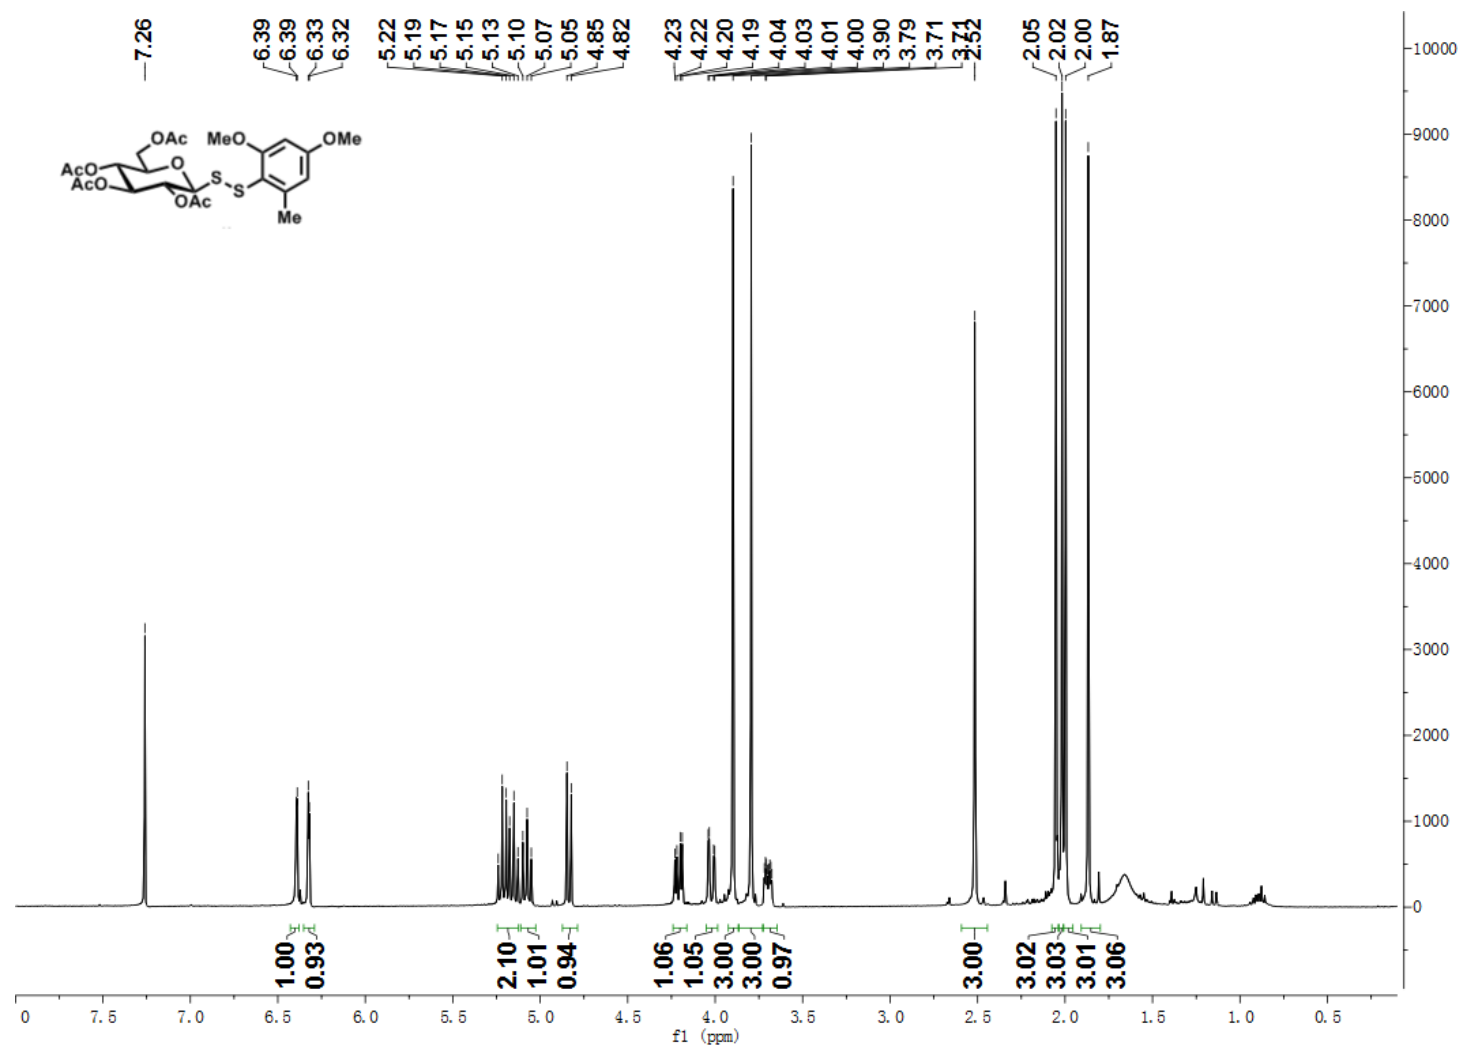

Supplementary Figure 71. <sup>1</sup>H NMR spectra for Compound 4b.

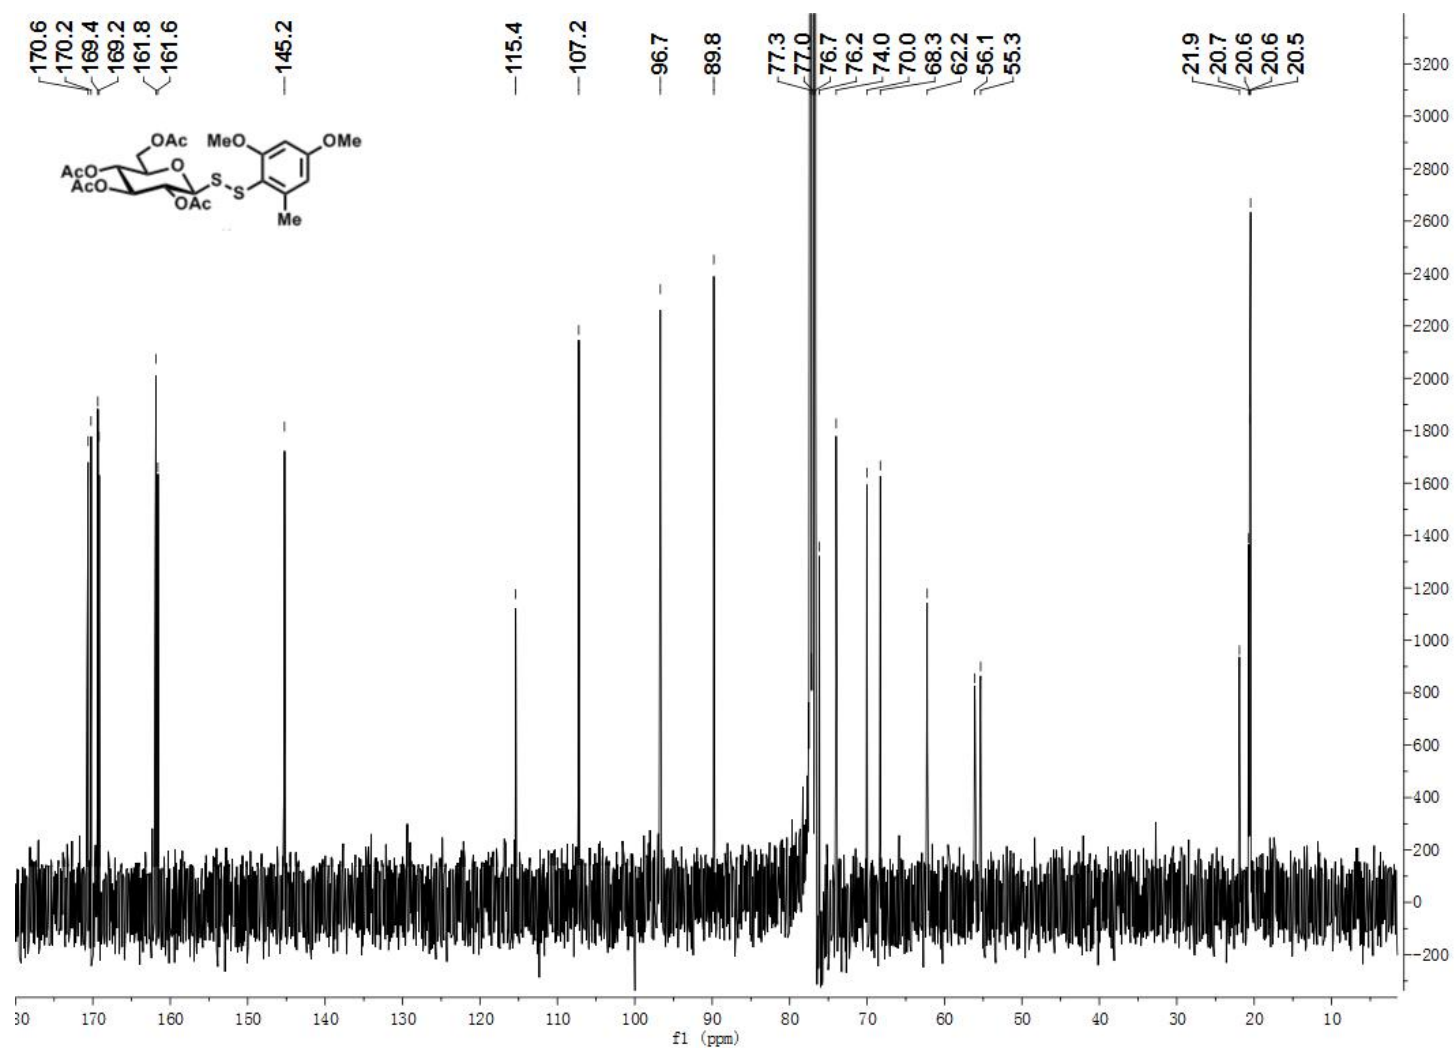

Supplementary Figure 72.  $^{13}\text{C}$  NMR spectra for Compound **4b**.

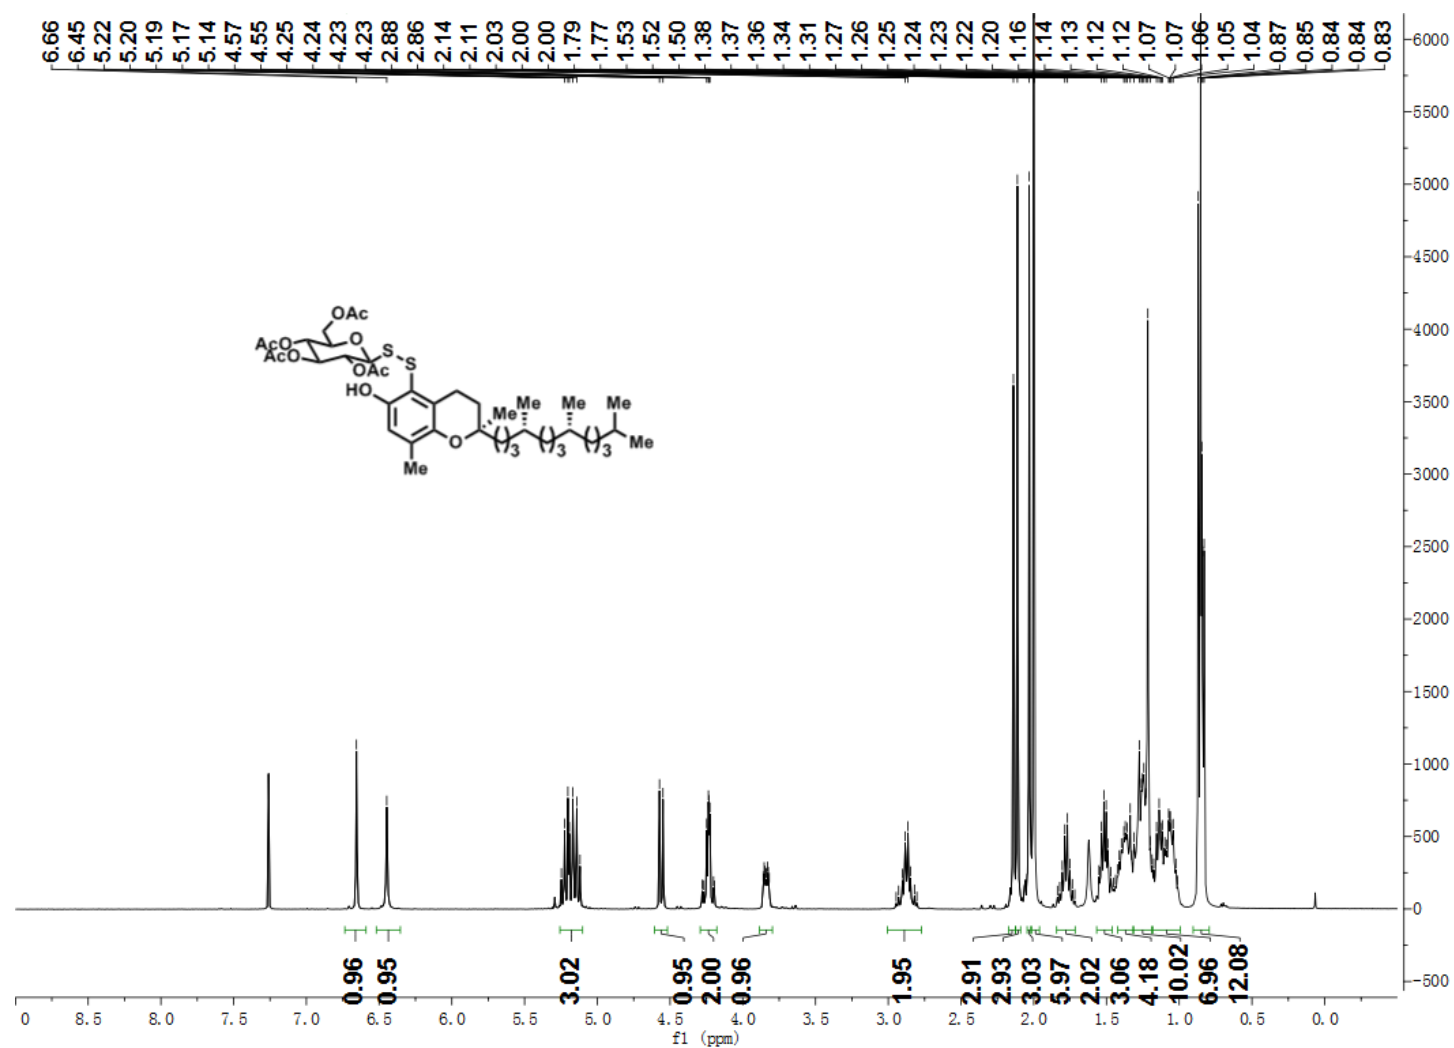

Supplementary Figure 73. <sup>1</sup>H NMR spectra for Compound 4c.

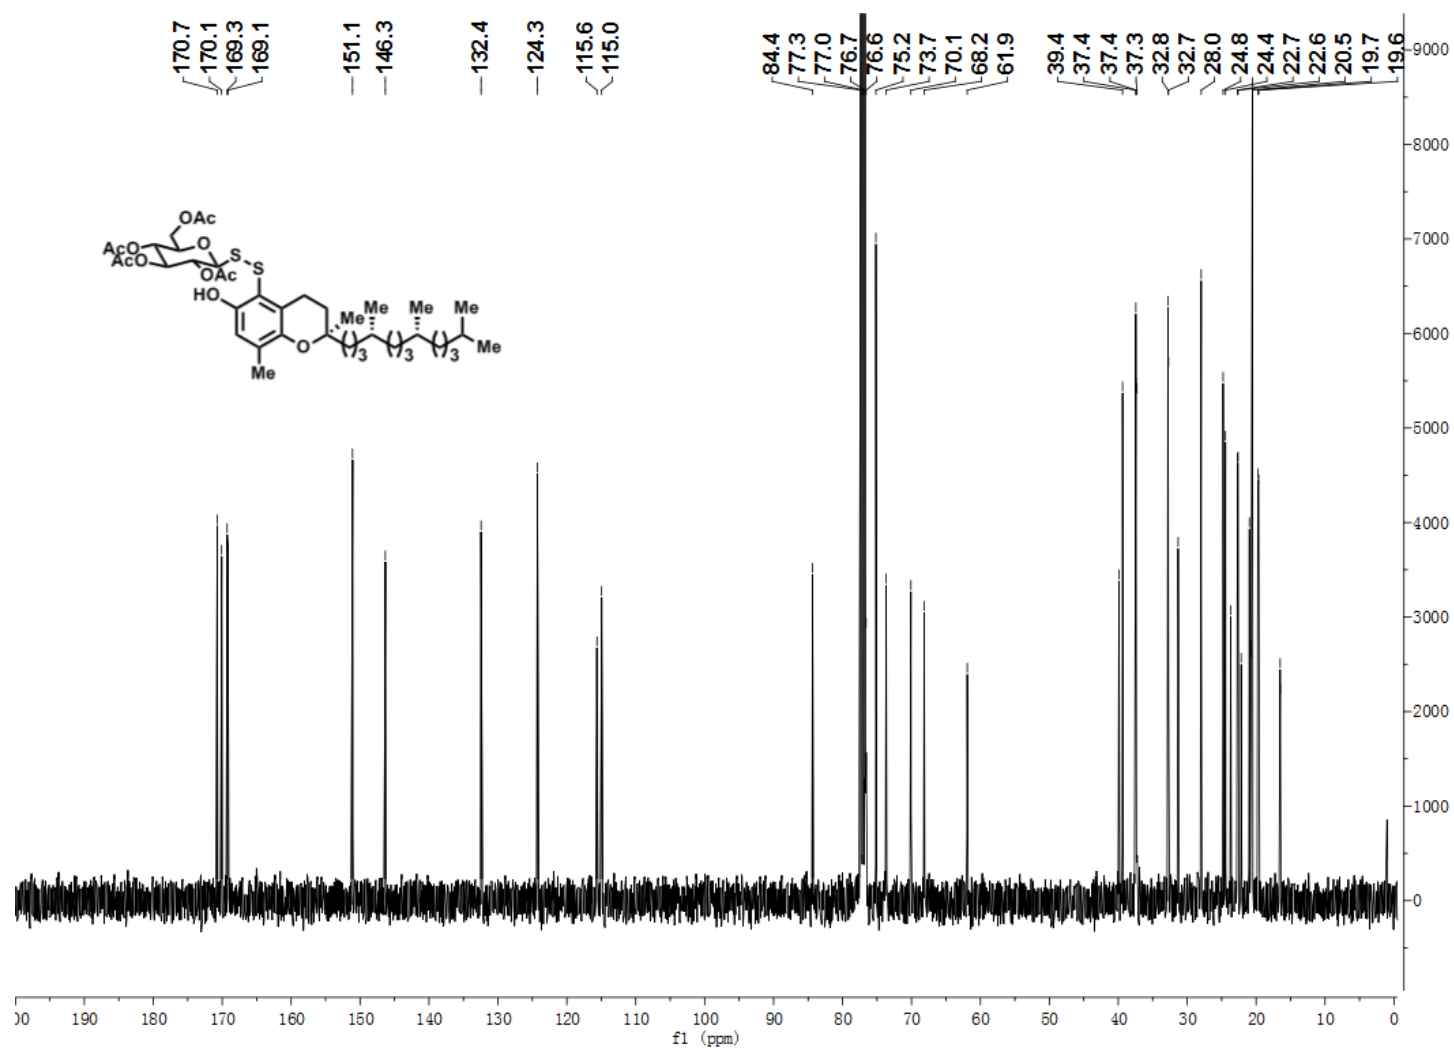

Supplementary Figure 74. <sup>13</sup>C NMR spectra for Compound 4c.



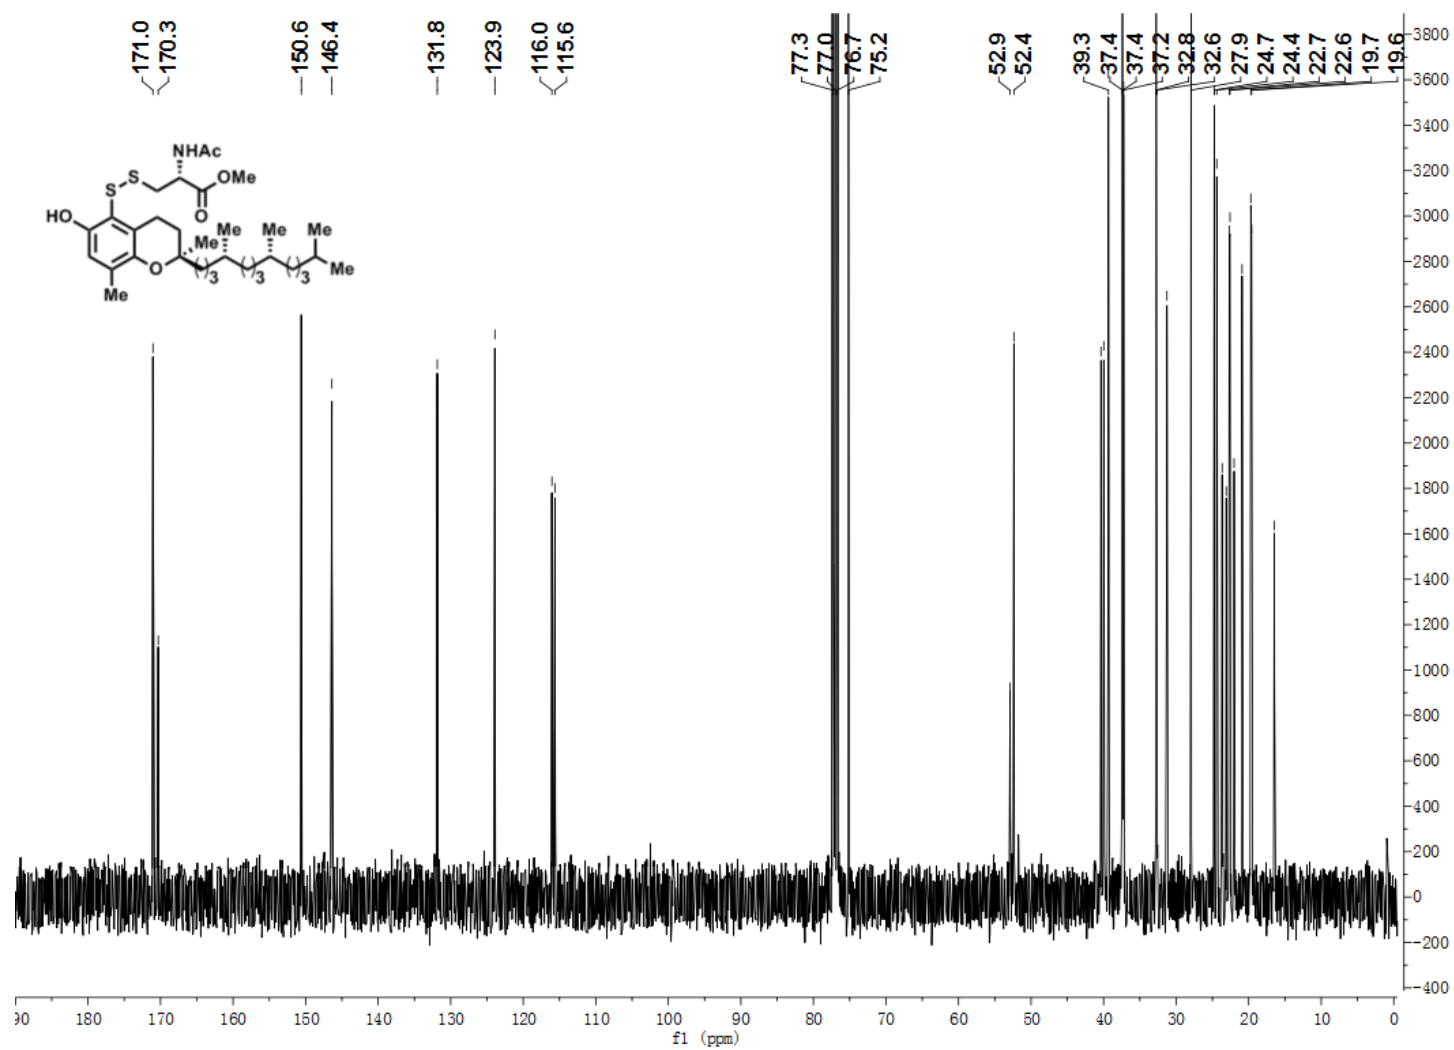

Supplementary Figure 76.  $^{13}\text{C}$  NMR spectra for Compound 4d.

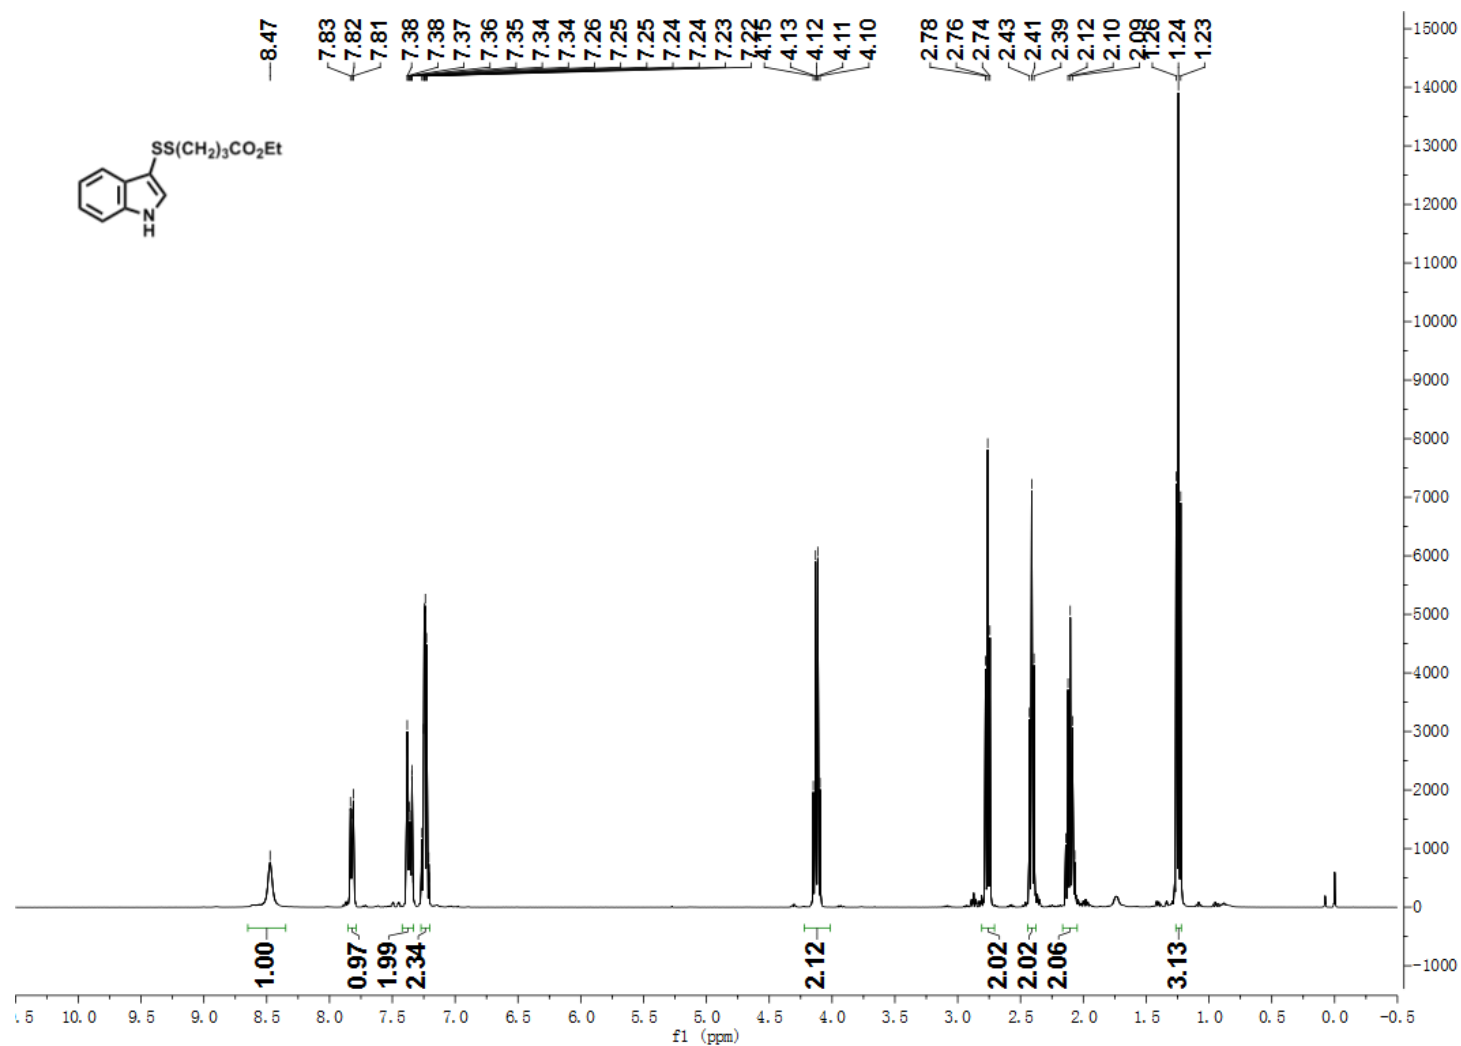

Supplementary Figure 77.  $^1\text{H}$  NMR spectra for Compound 5a.

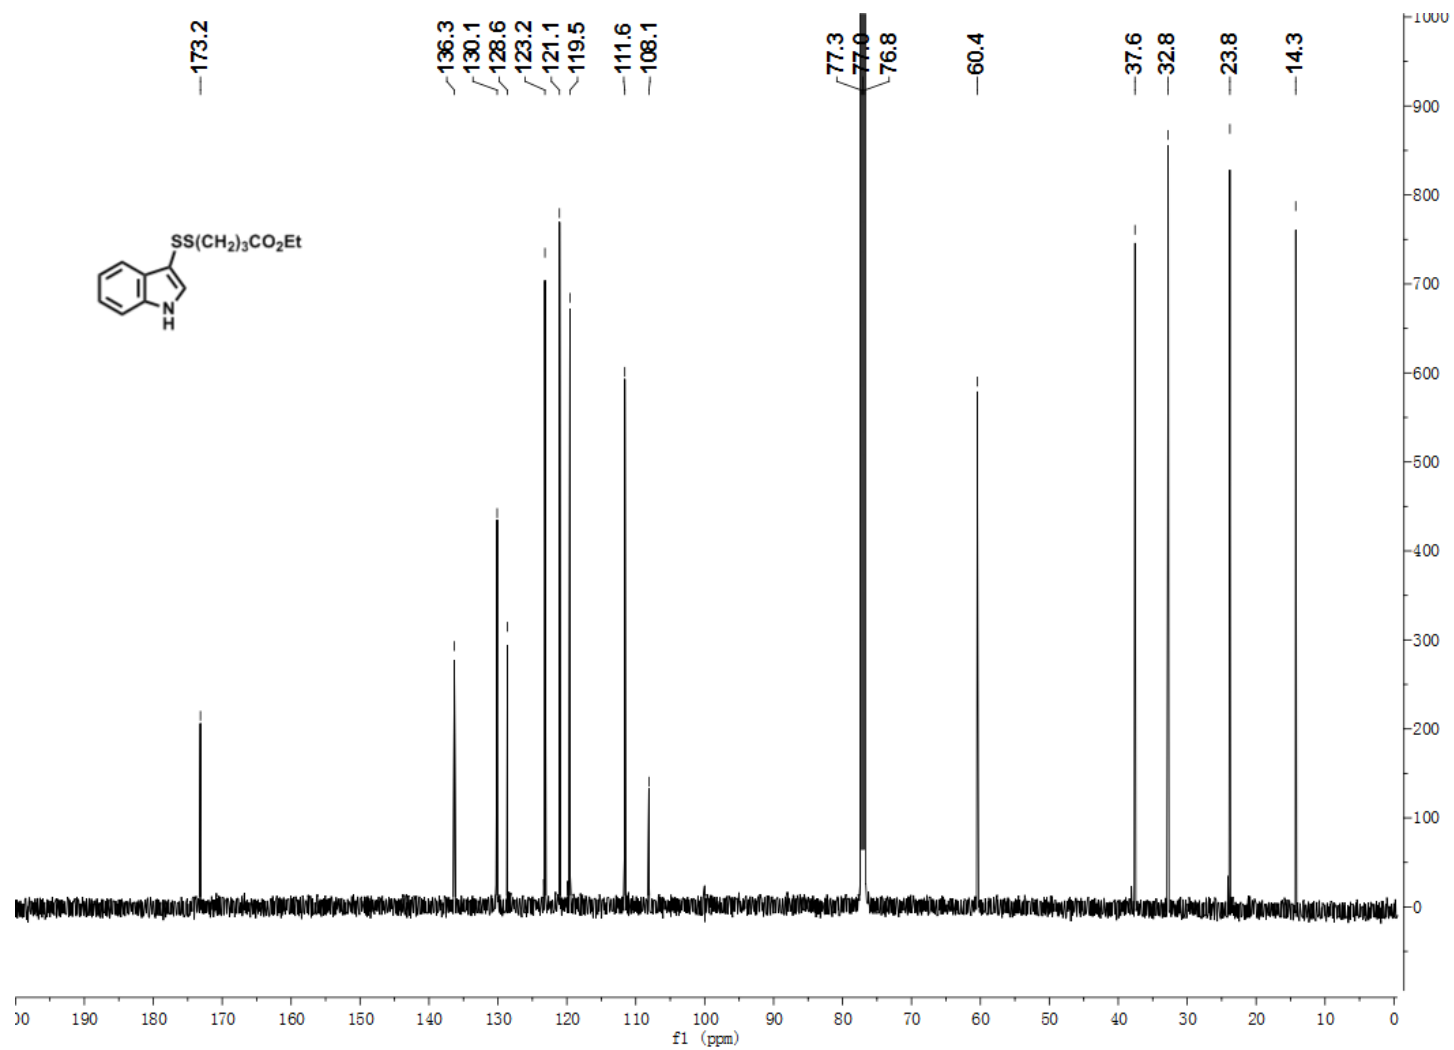

Supplementary Figure 78. <sup>13</sup>C NMR spectra for Compound 5a.

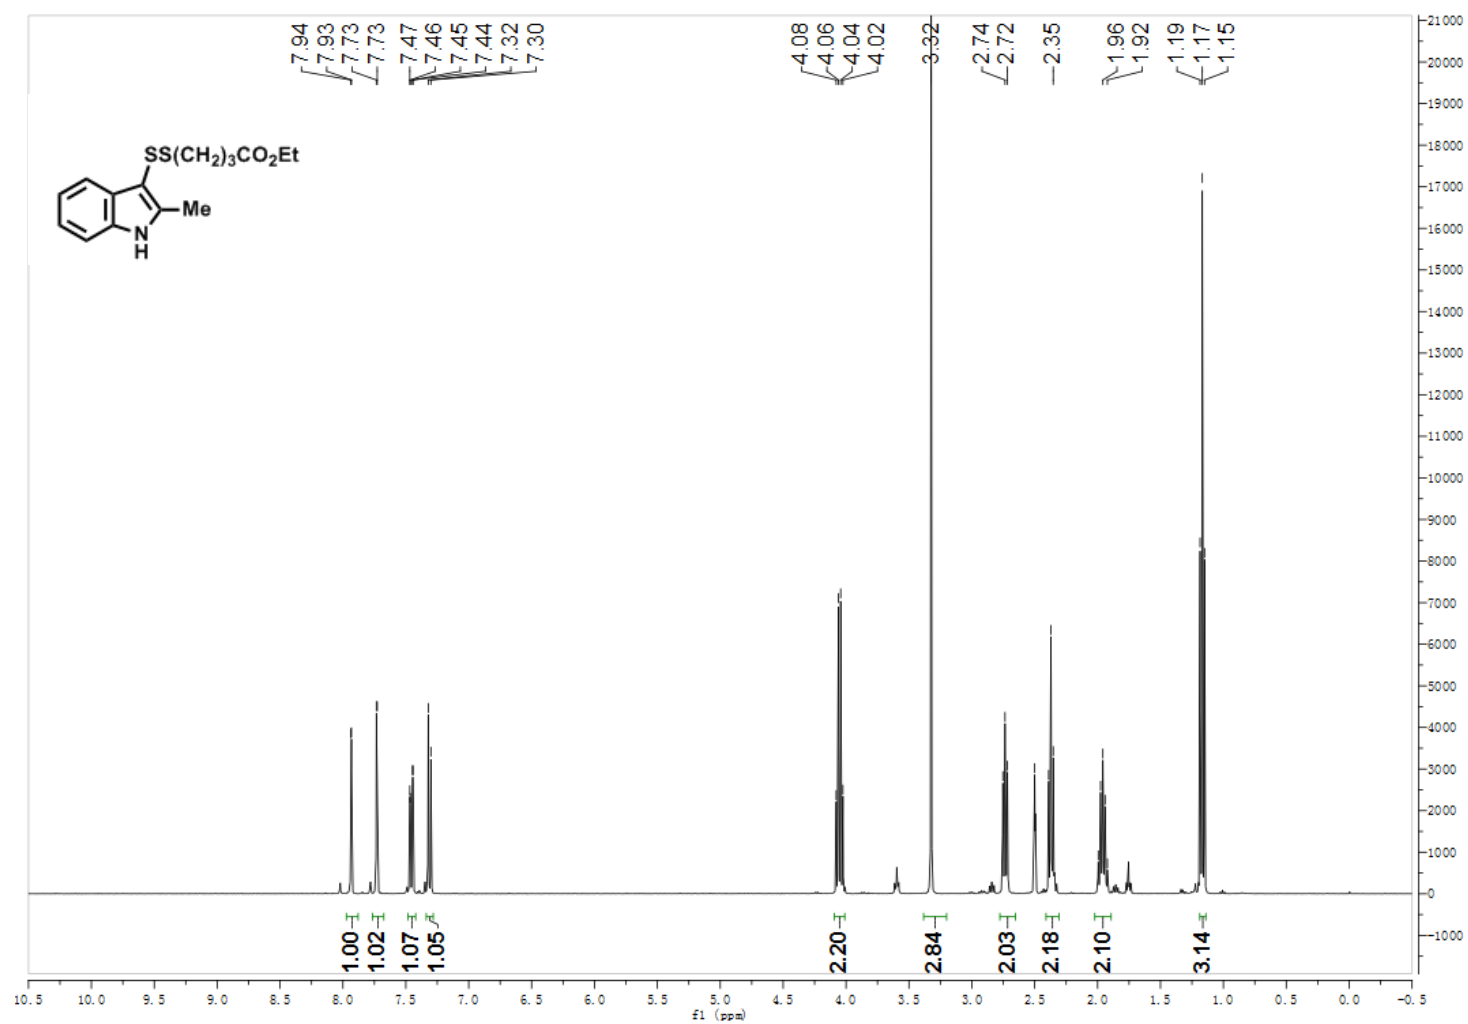

Supplementary Figure 79. <sup>1</sup>H NMR spectra for Compound 5b.

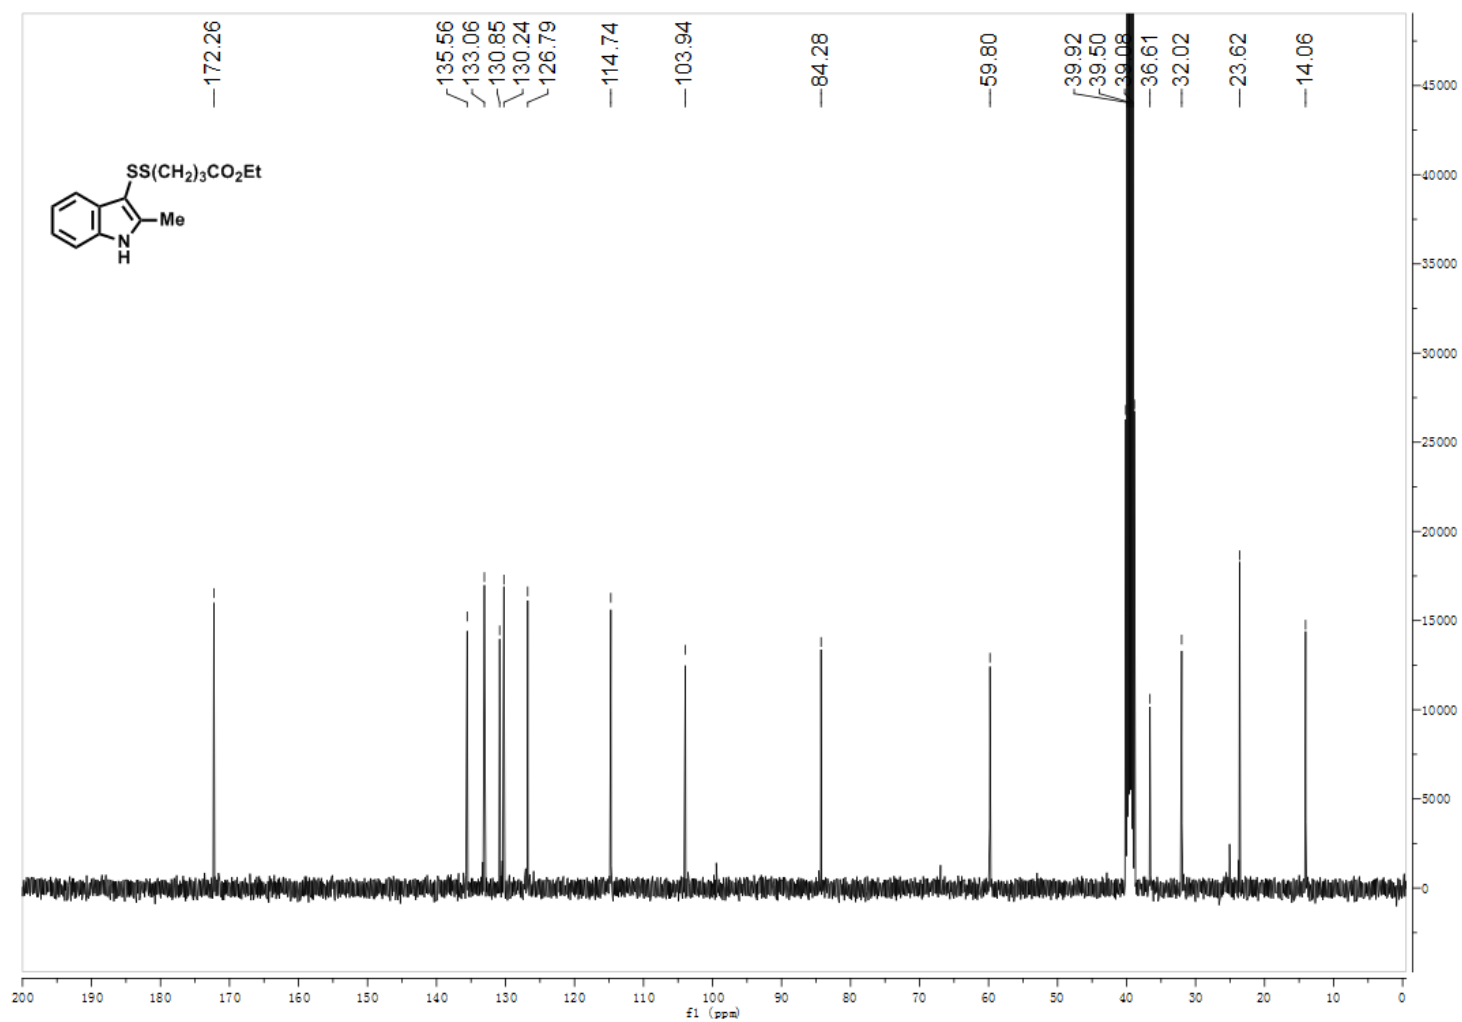

Supplementary Figure 80. <sup>13</sup>C NMR spectra for Compound 5b.

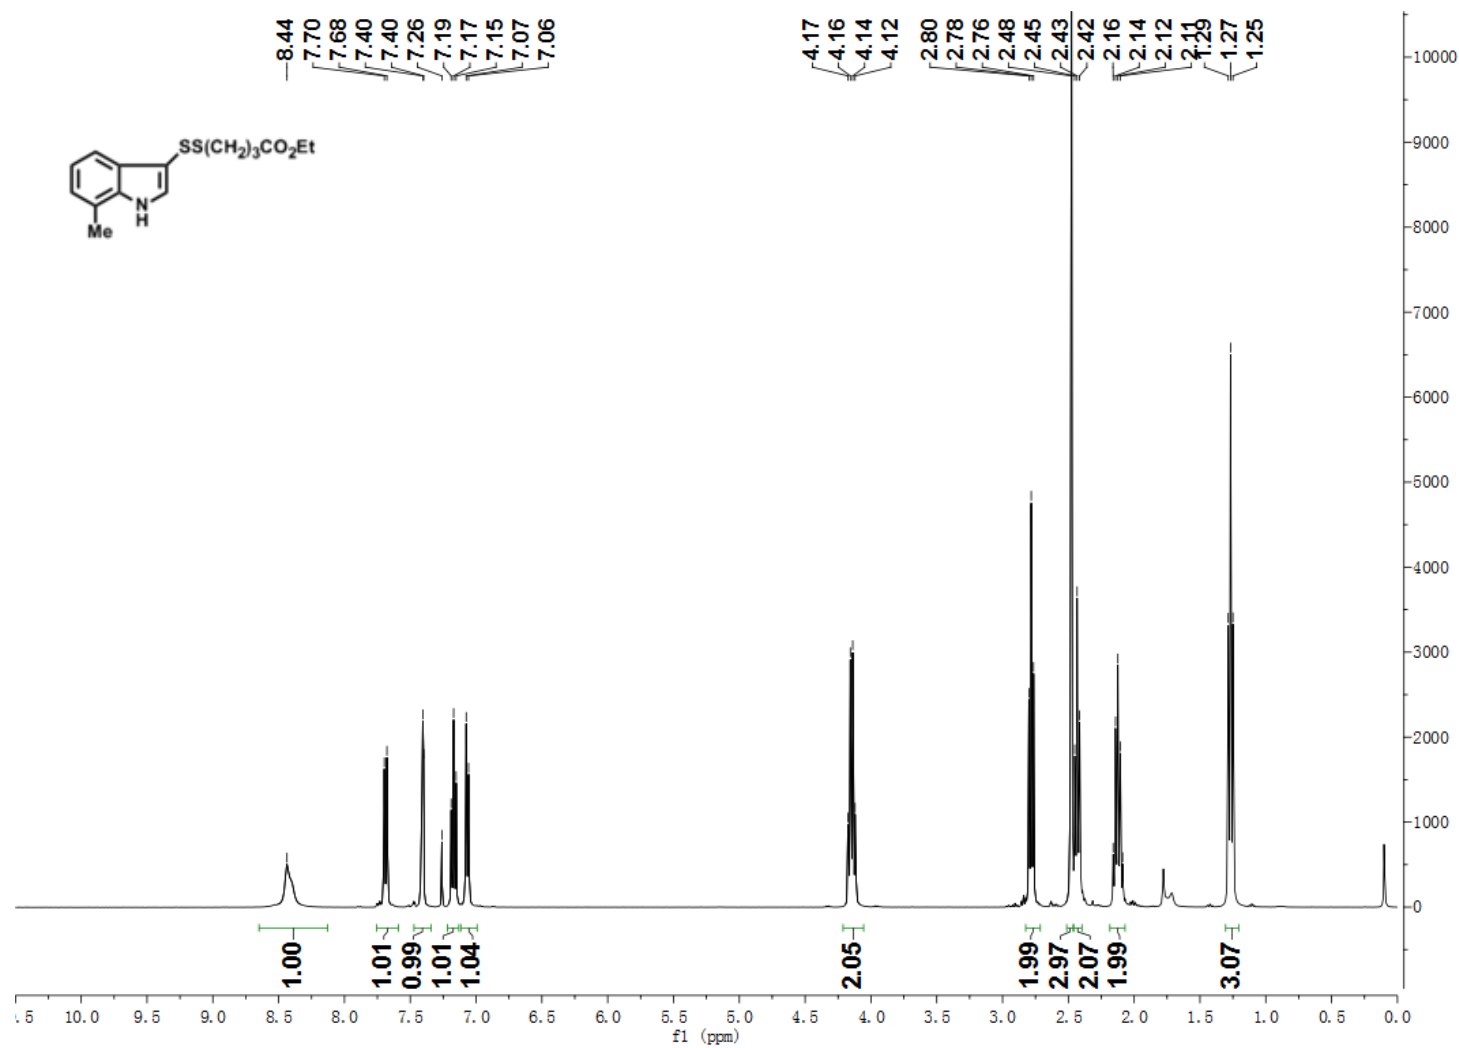

Supplementary Figure 81. <sup>1</sup>H NMR spectra for Compound 5c.

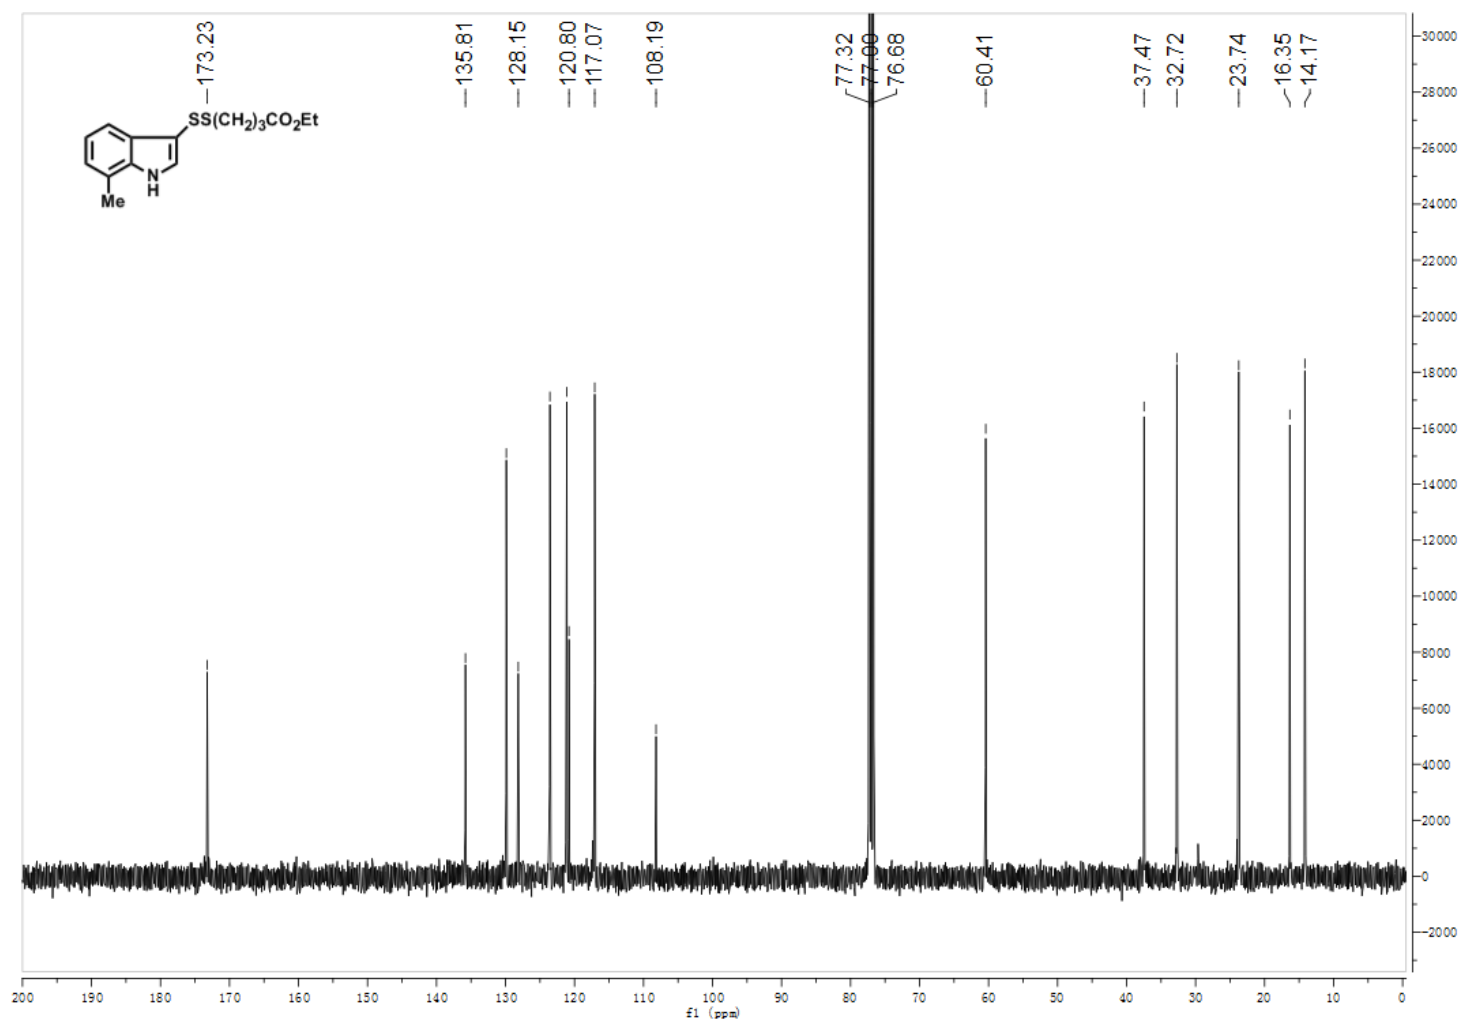

Supplementary Figure 82. <sup>13</sup>C NMR spectra for Compound 5c.

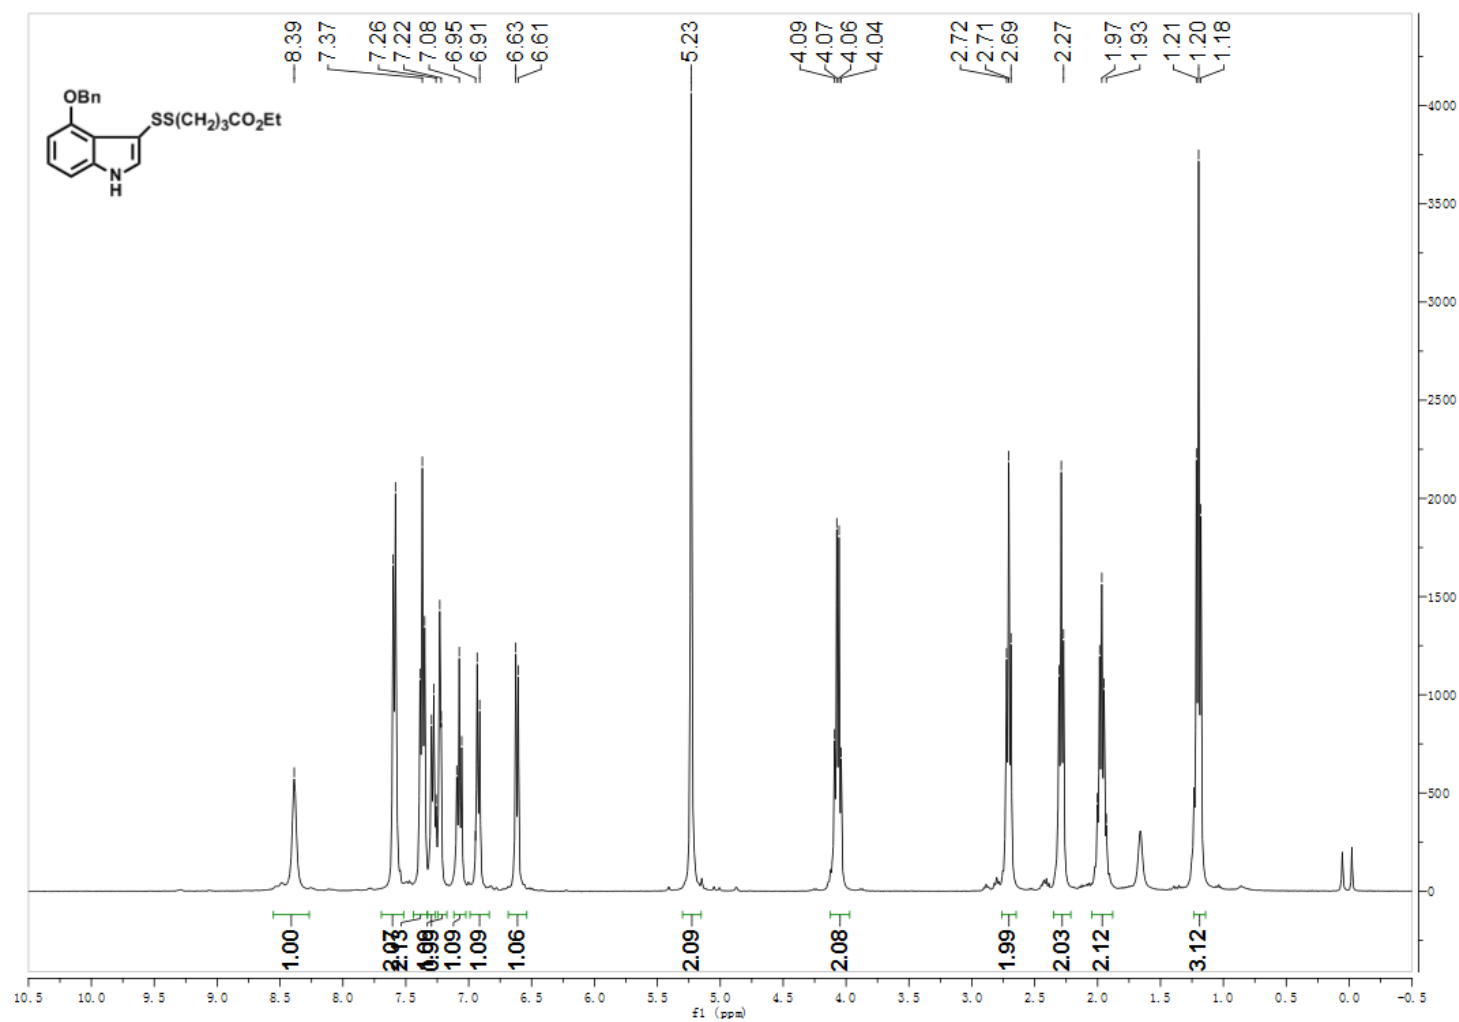

Supplementary Figure 83. <sup>1</sup>H NMR spectra for Compound 5d.

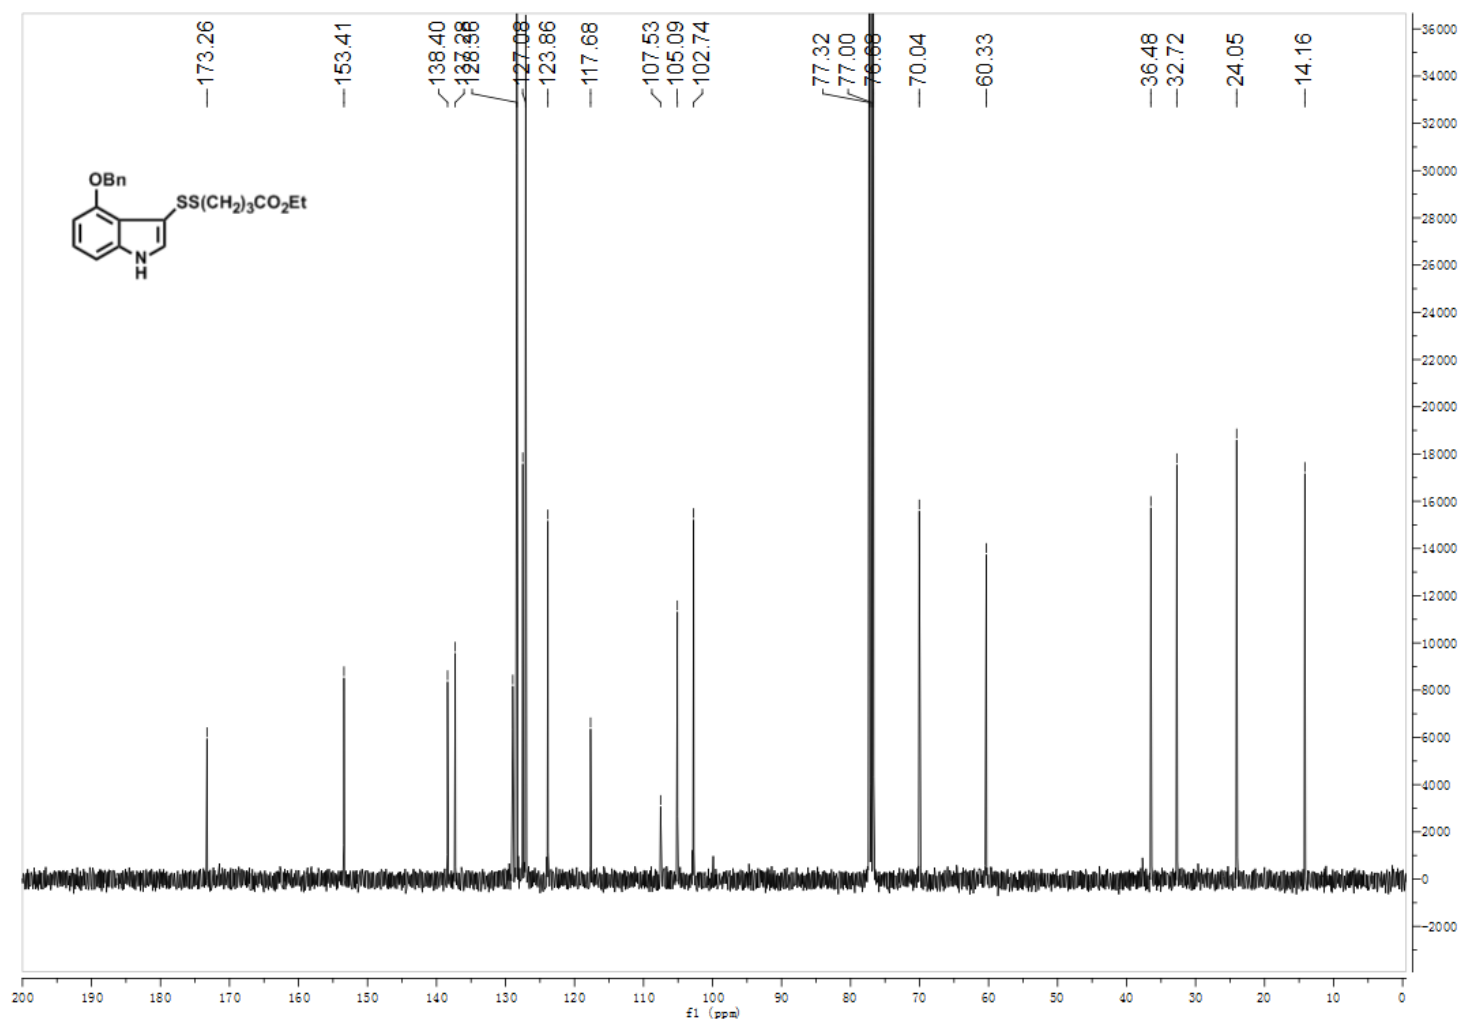

Supplementary Figure 84. <sup>1</sup>H NMR spectra for Compound 5d.

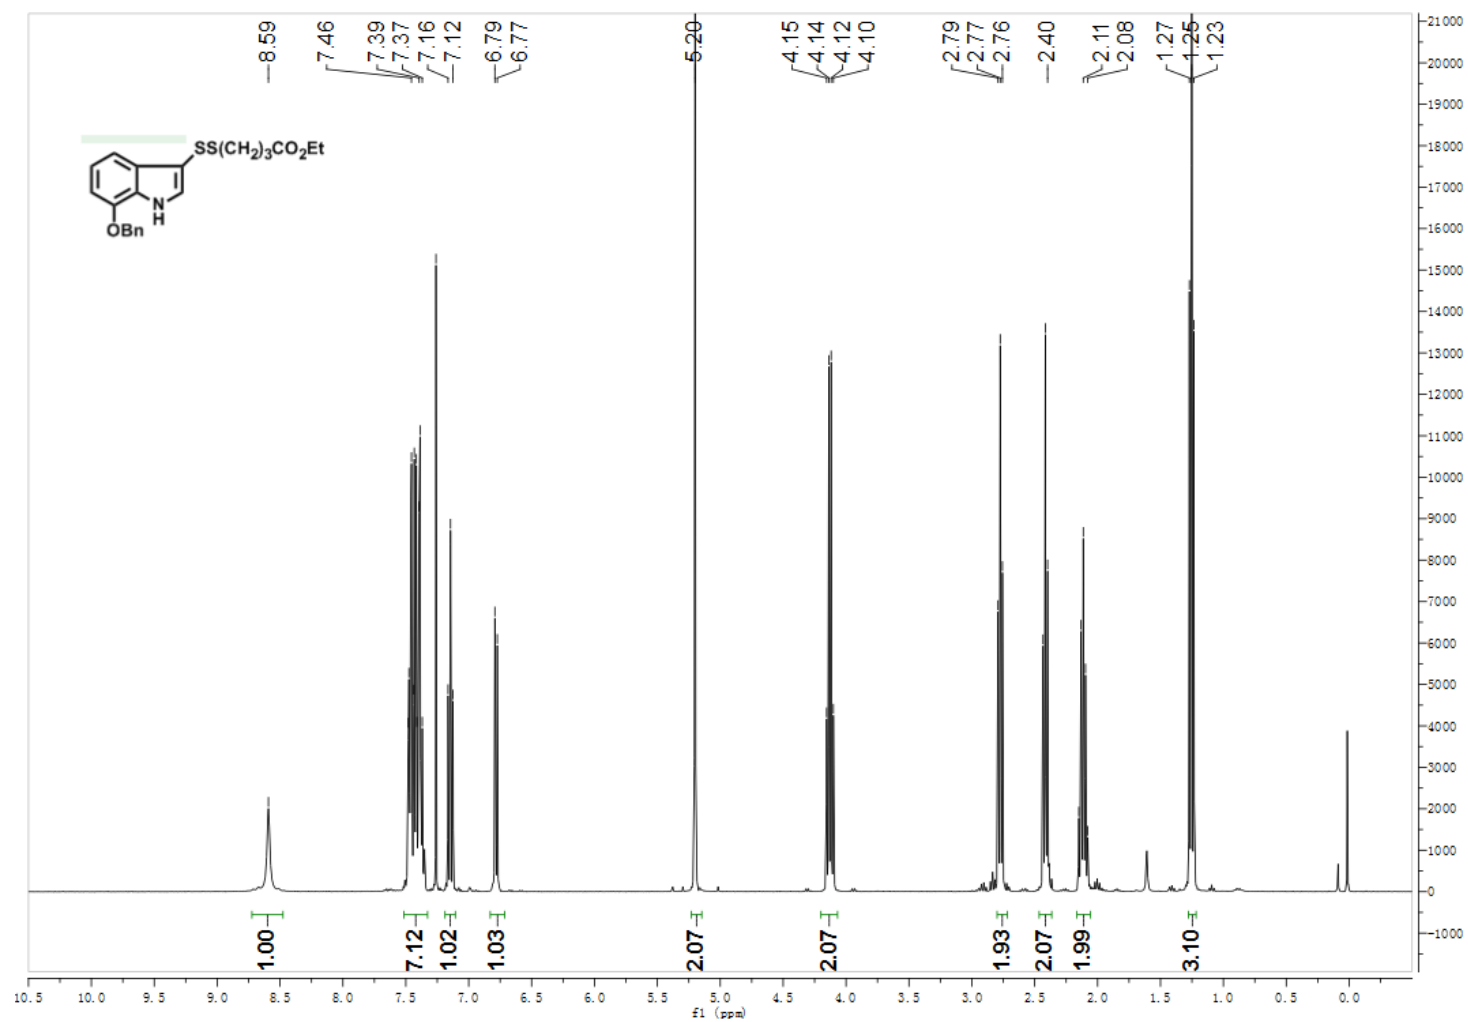

Supplementary Figure 85. <sup>1</sup>H NMR spectra for Compound 5e.

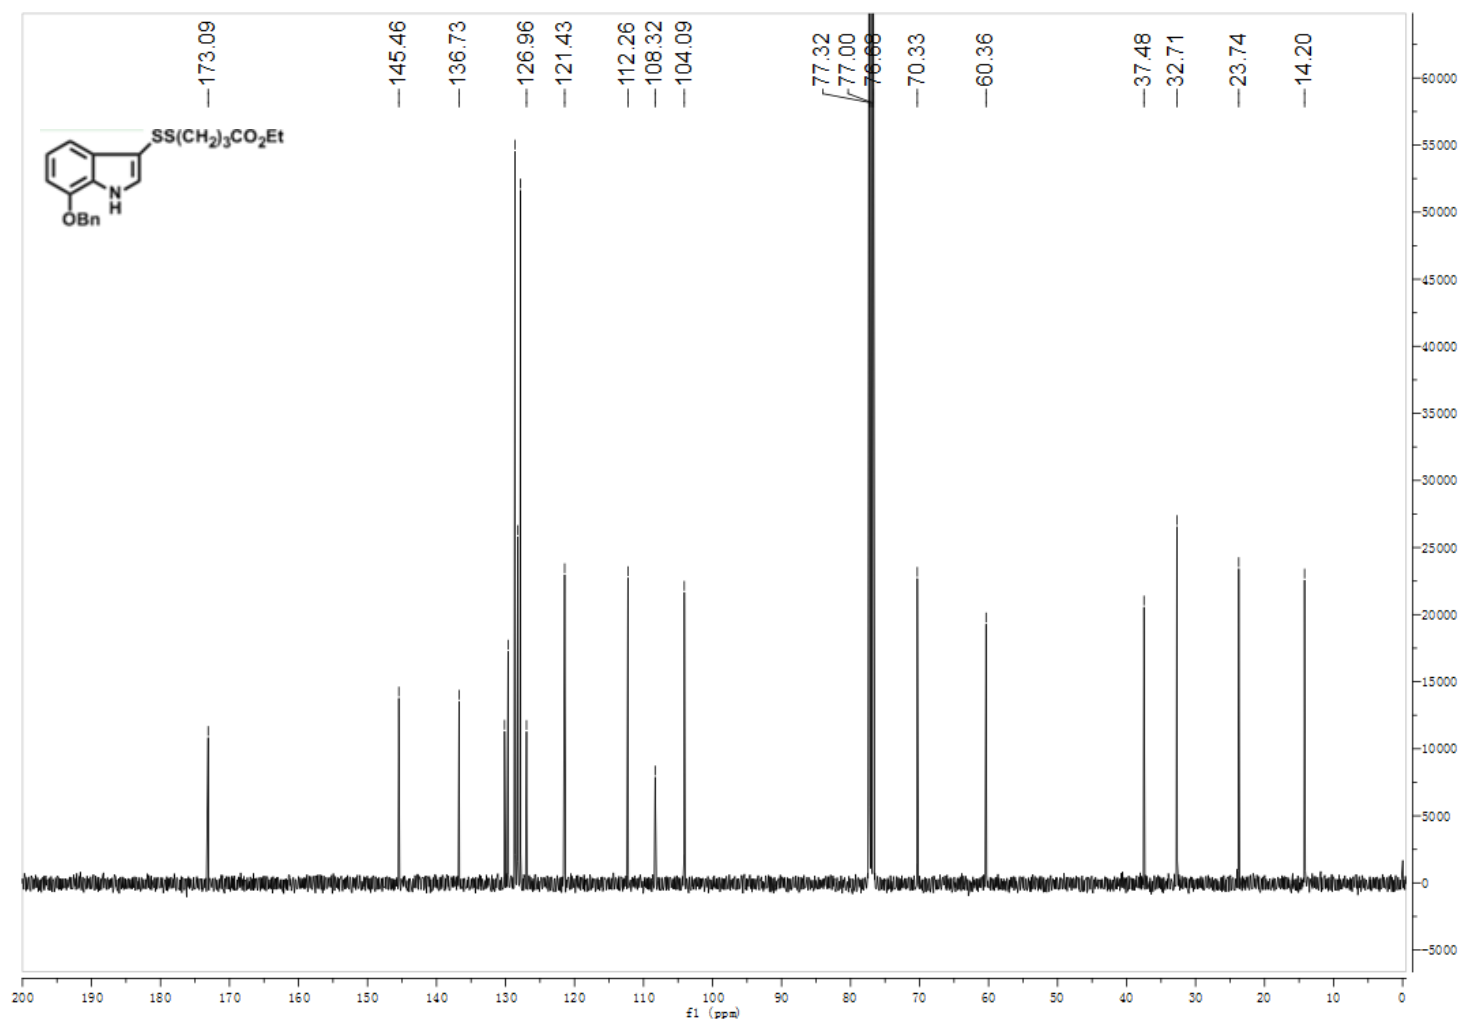

Supplementary Figure 86. <sup>13</sup>C NMR spectra for Compound 5e.

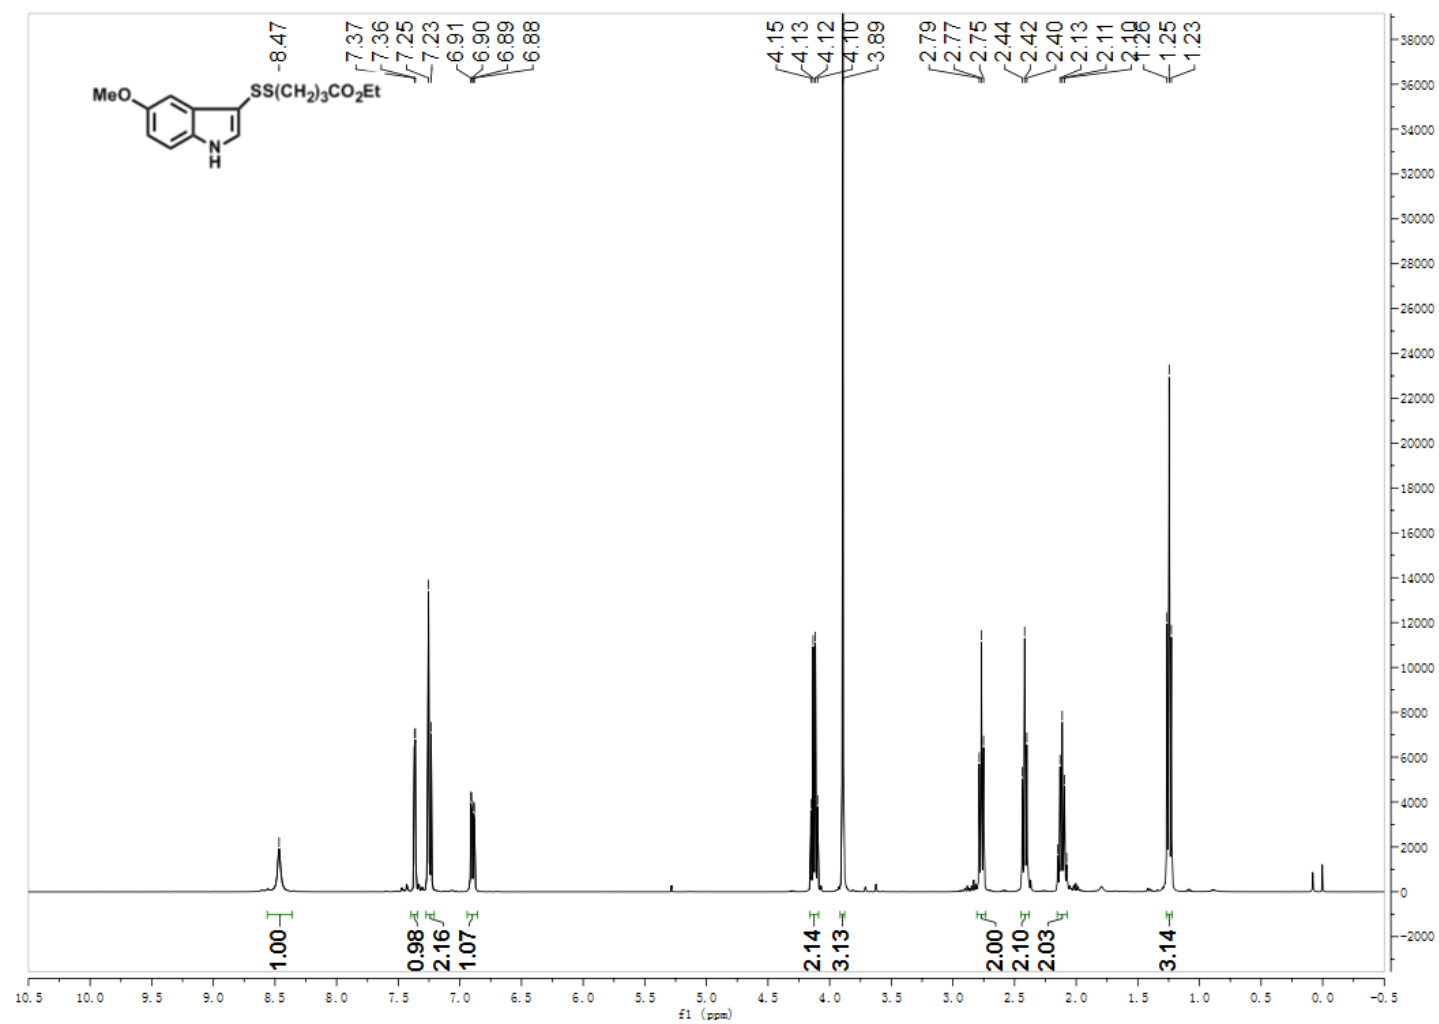

Supplementary Figure 87. <sup>1</sup>H NMR spectra for Compound 5f.

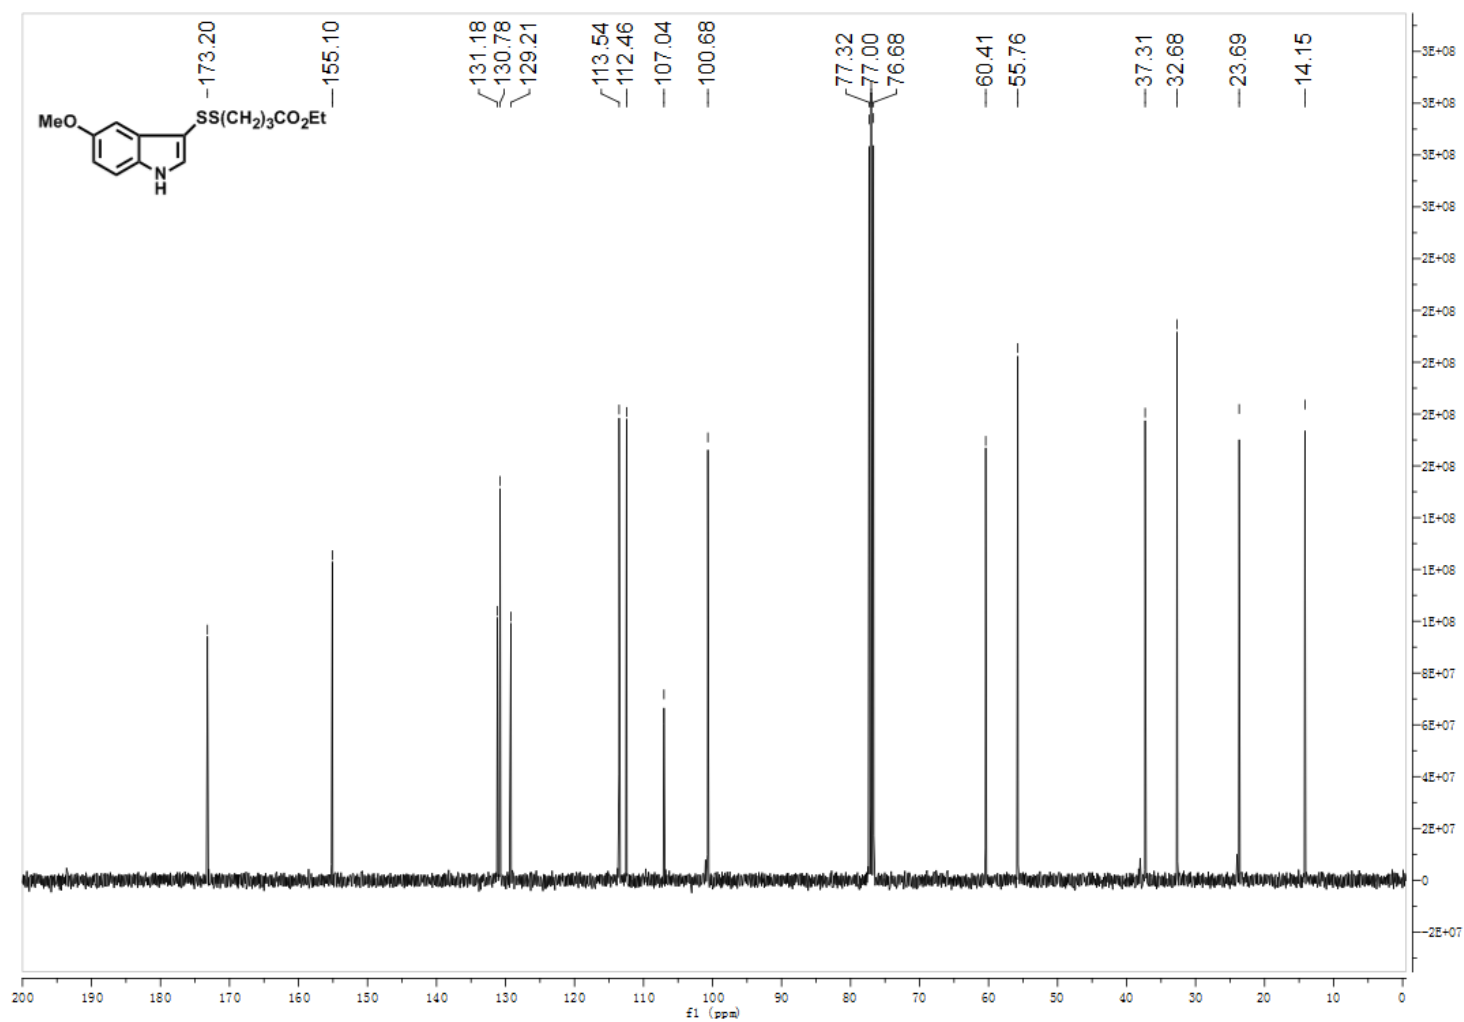

Supplementary Figure 88.  $^{13}\text{C}$  NMR spectra for Compound **5f**.

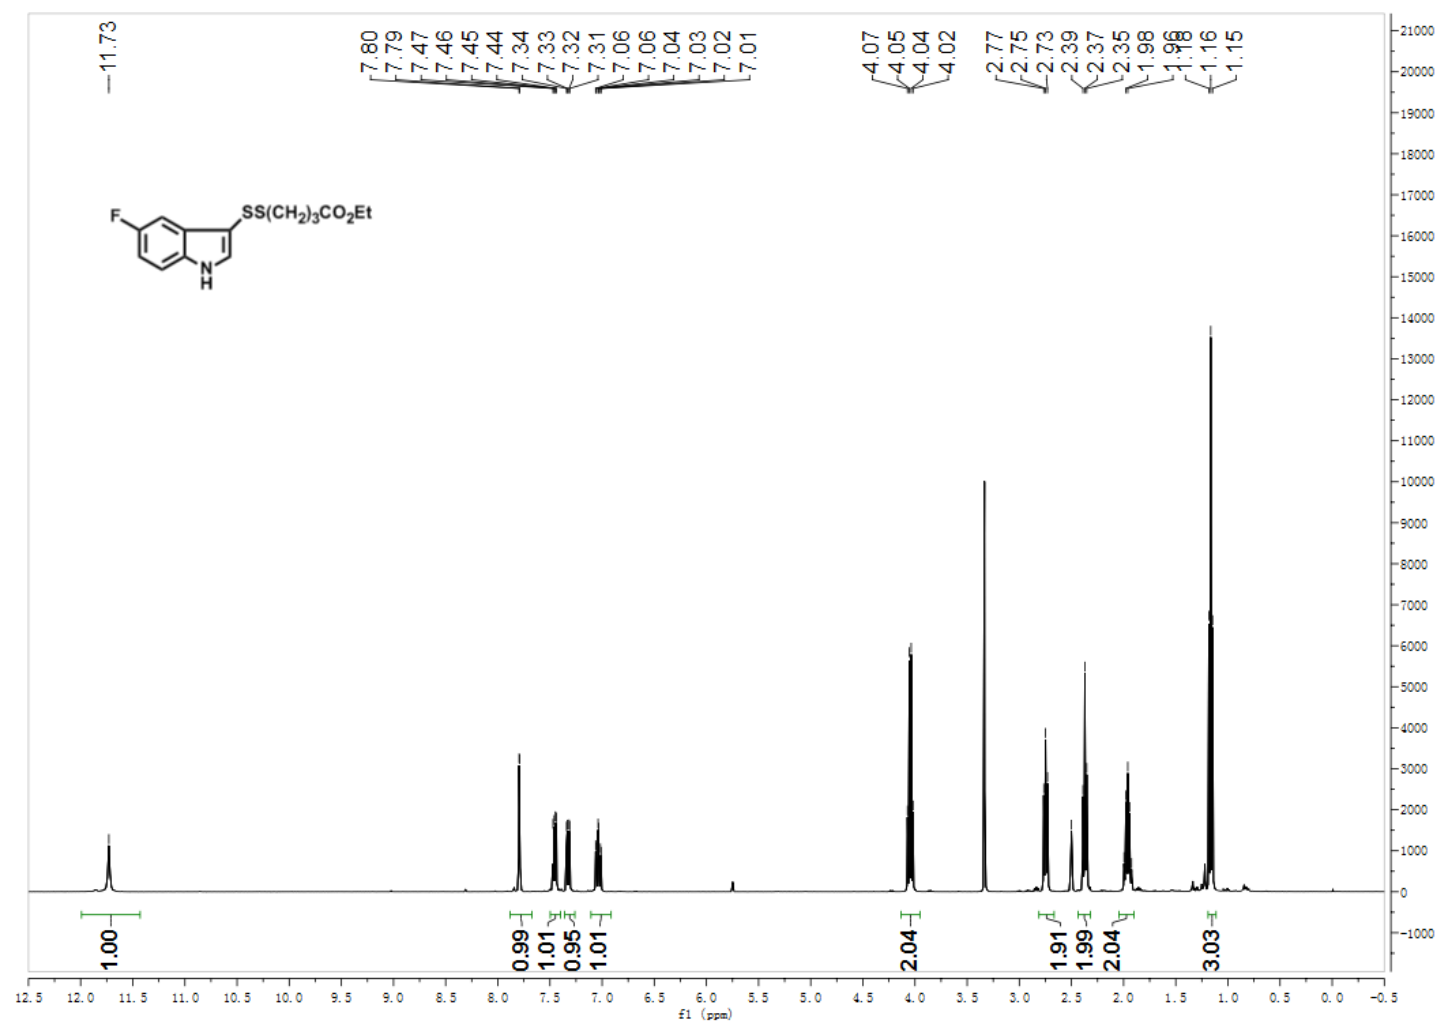

Supplementary Figure 89. <sup>1</sup>H NMR spectra for Compound 5g.

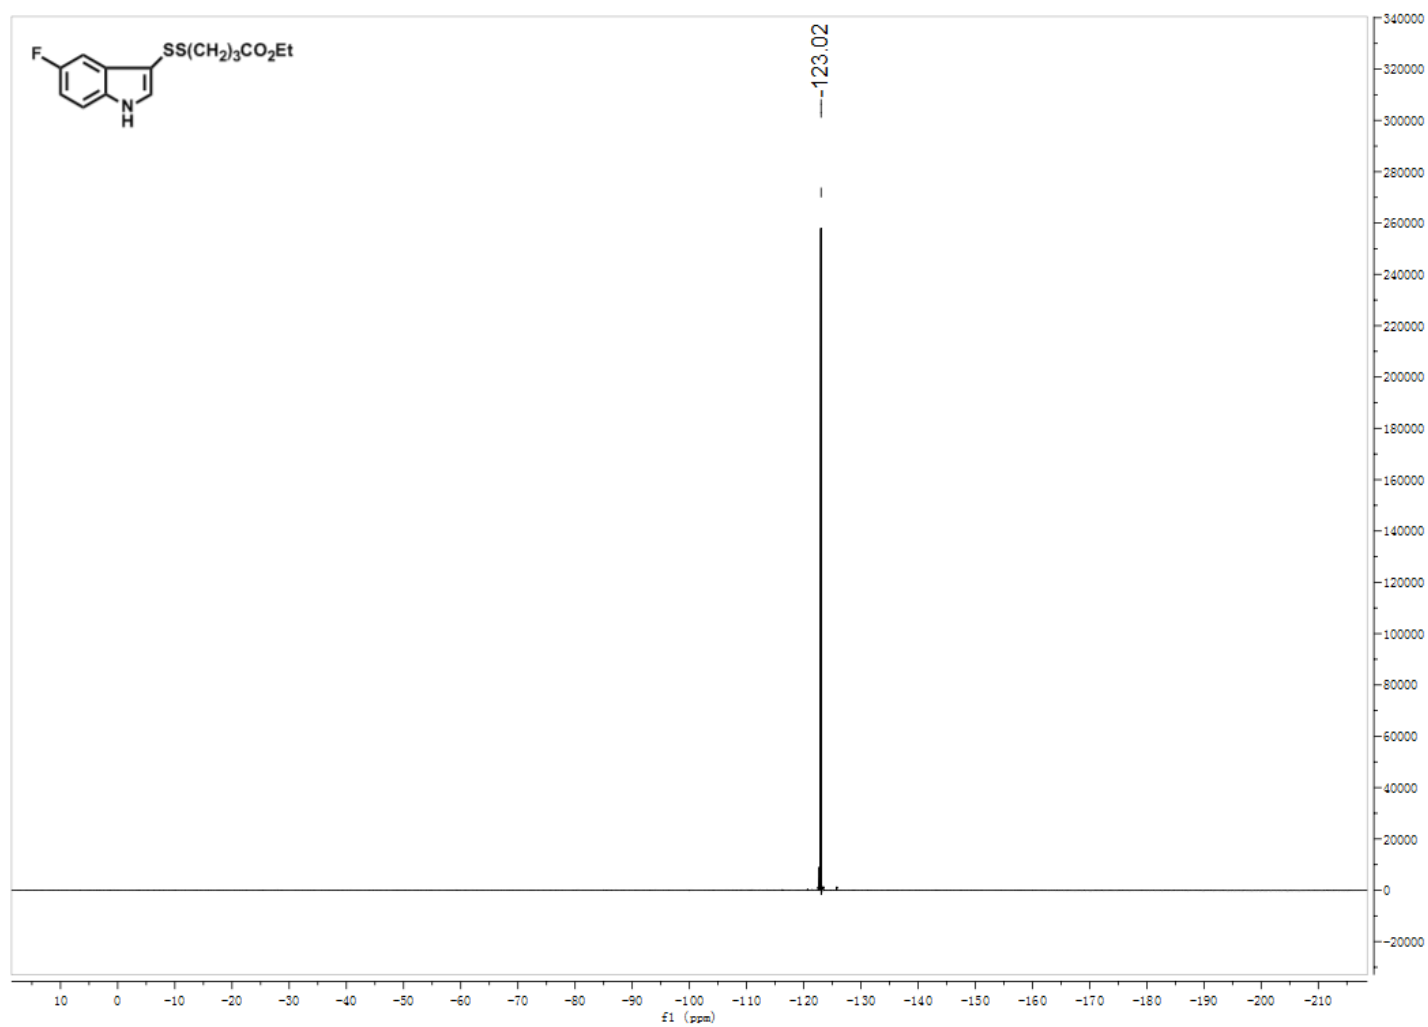

**Supplementary Figure 90.**  $^{19}\text{F}$  NMR spectra for Compound **5g**.

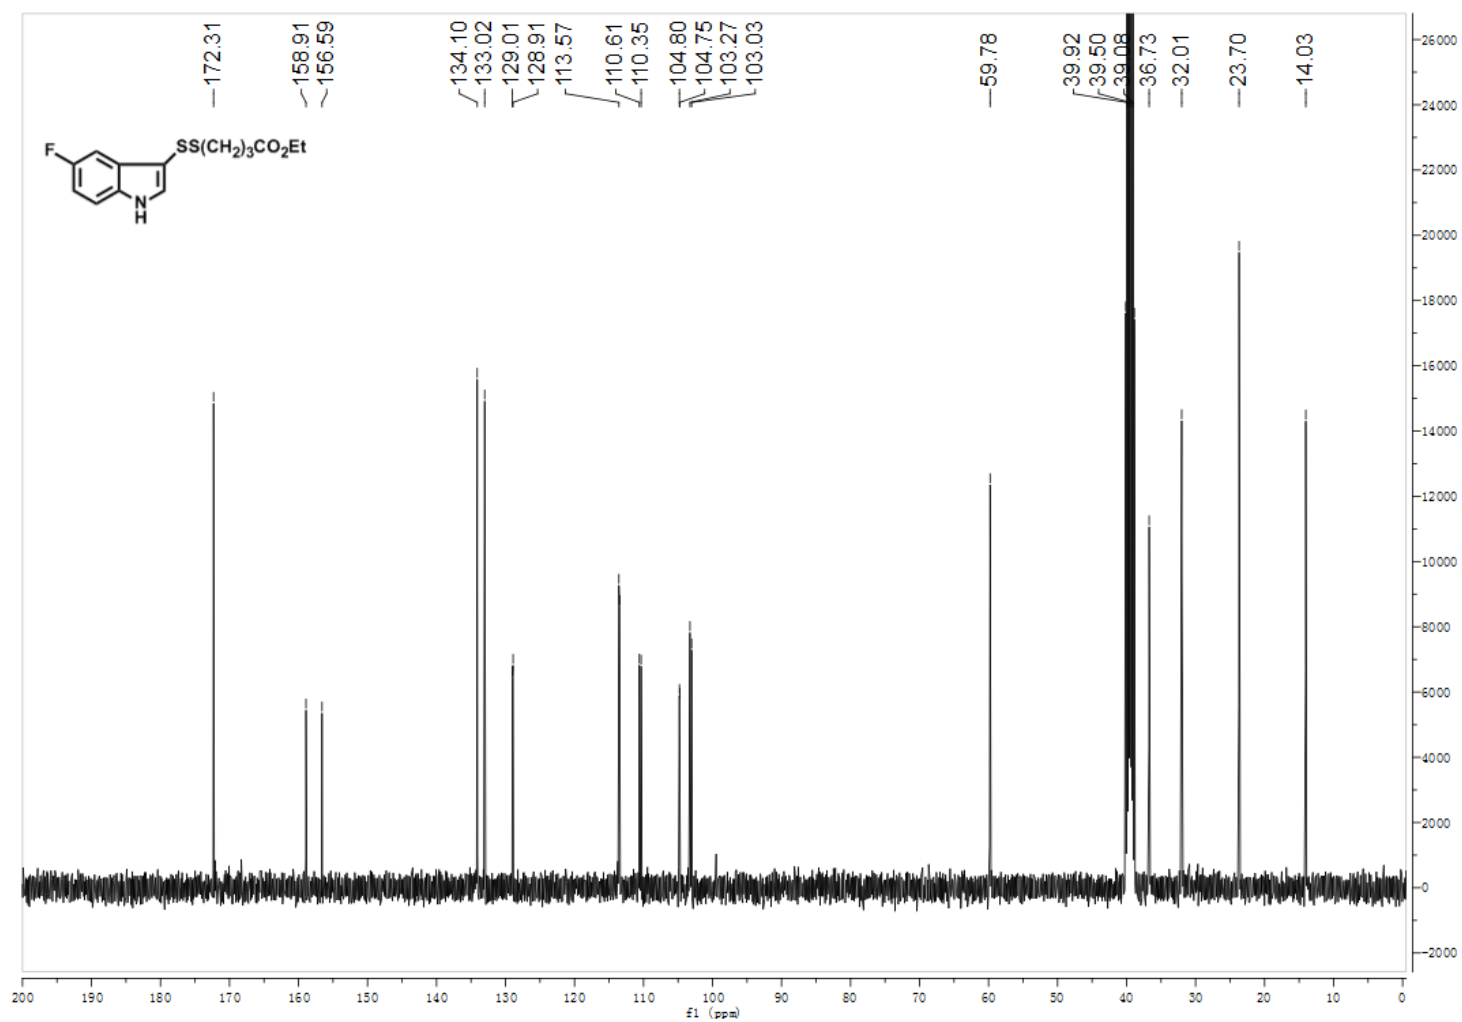

**Supplementary Figure 91.** <sup>13</sup>C NMR spectra for Compound **5g**.

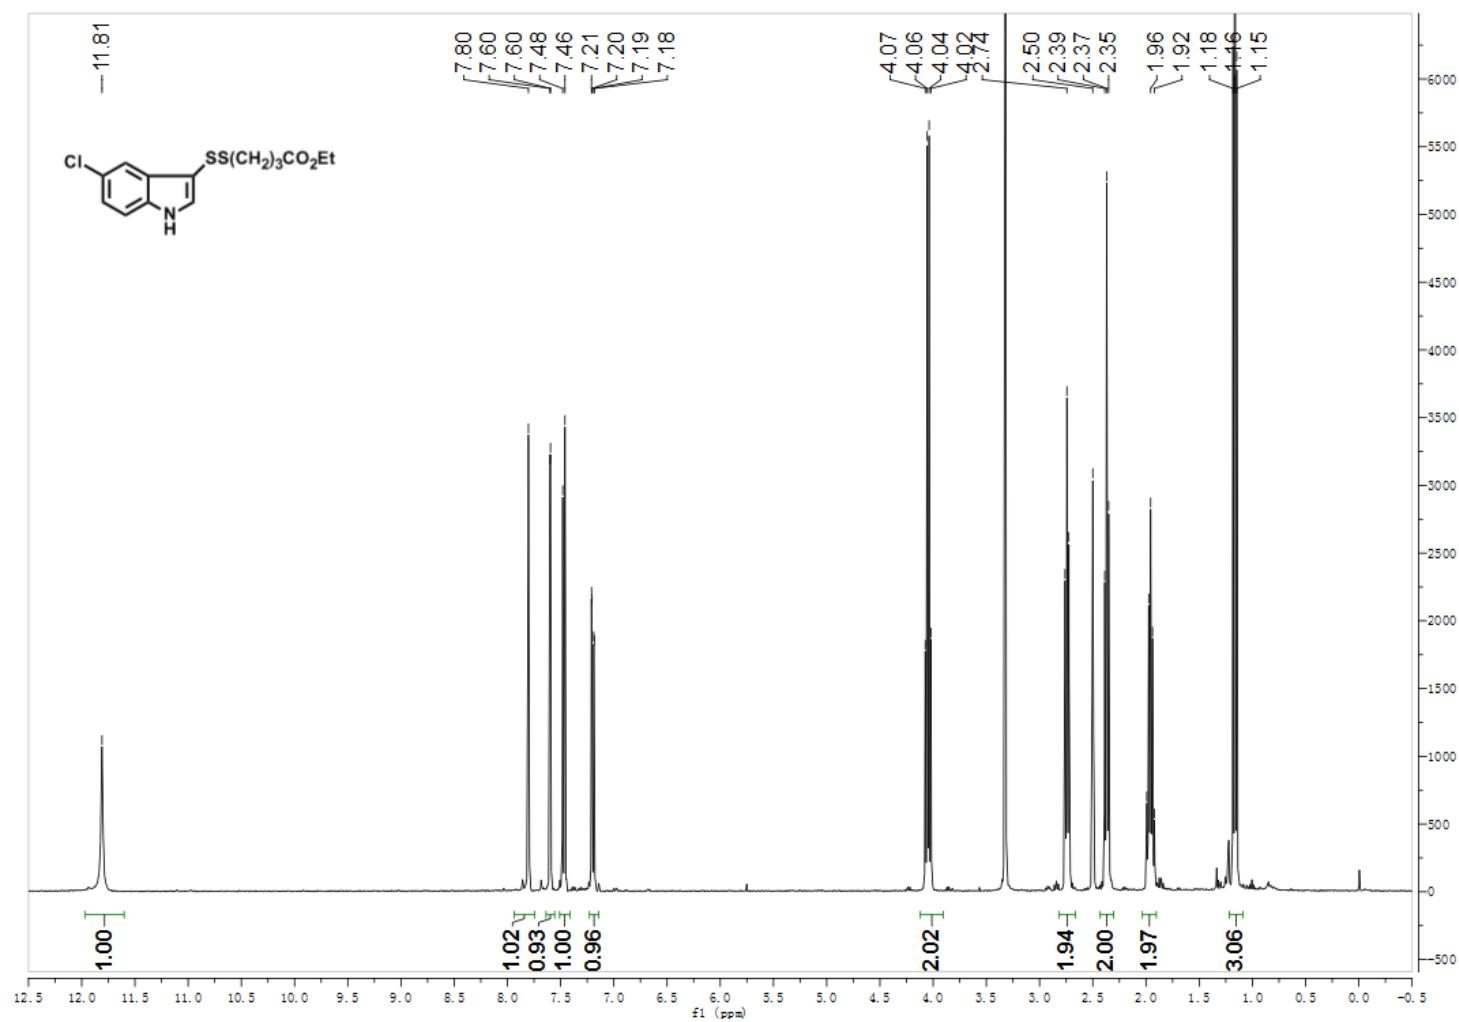

Supplementary Figure 92. <sup>1</sup>H NMR spectra for Compound 5h.

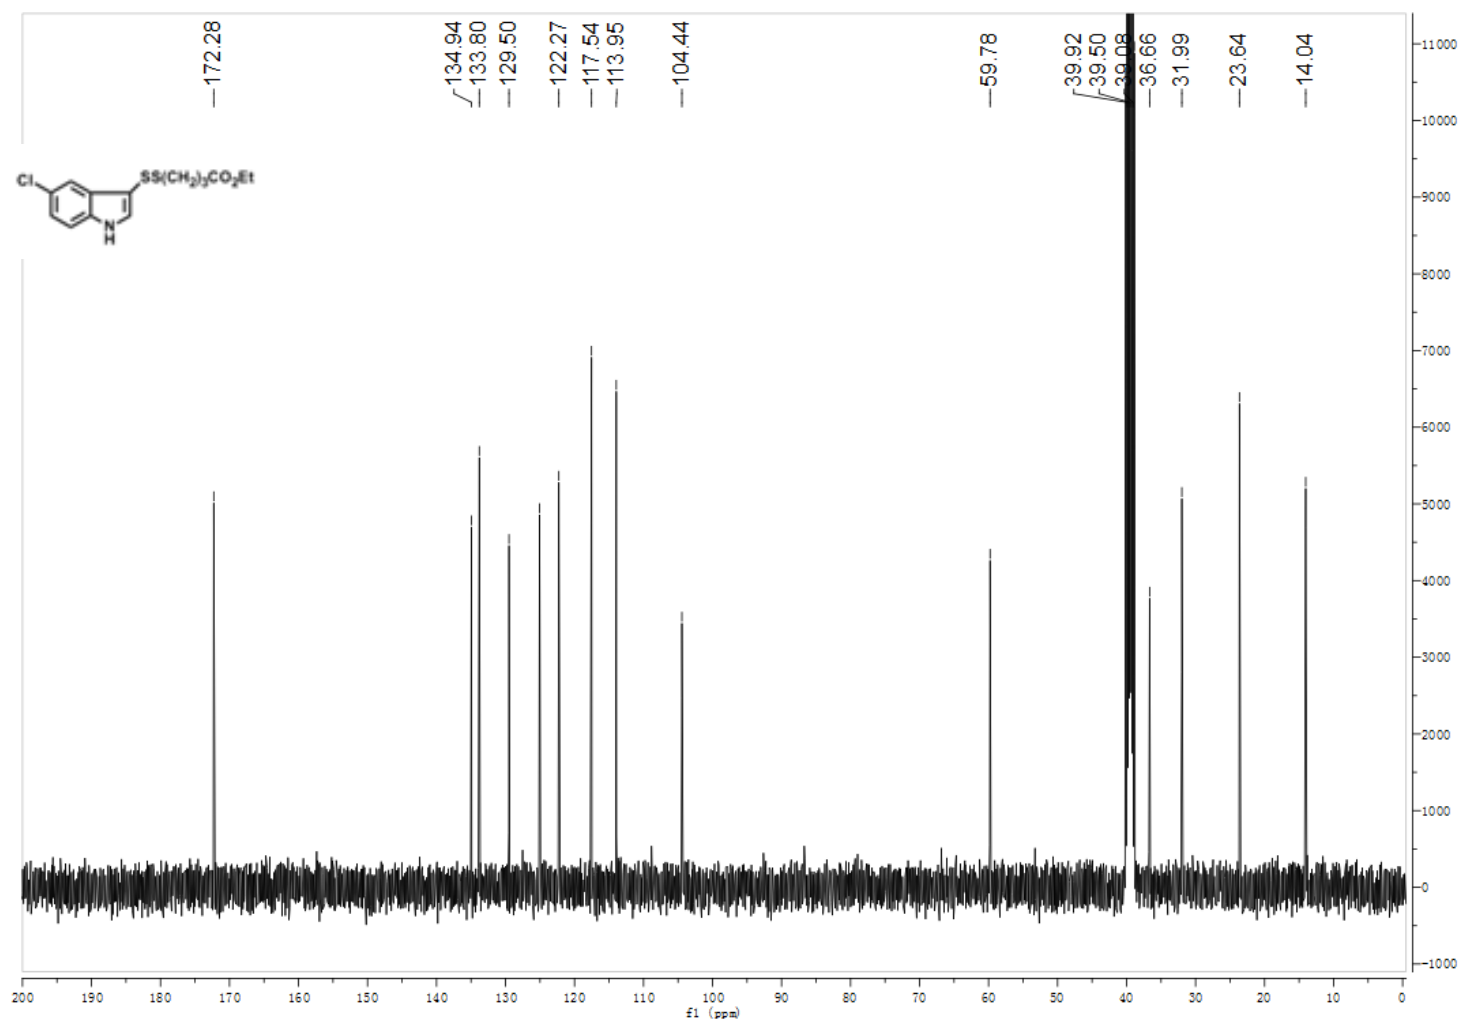

**Supplementary Figure 93.** <sup>13</sup>C NMR spectra for Compound **5h**.

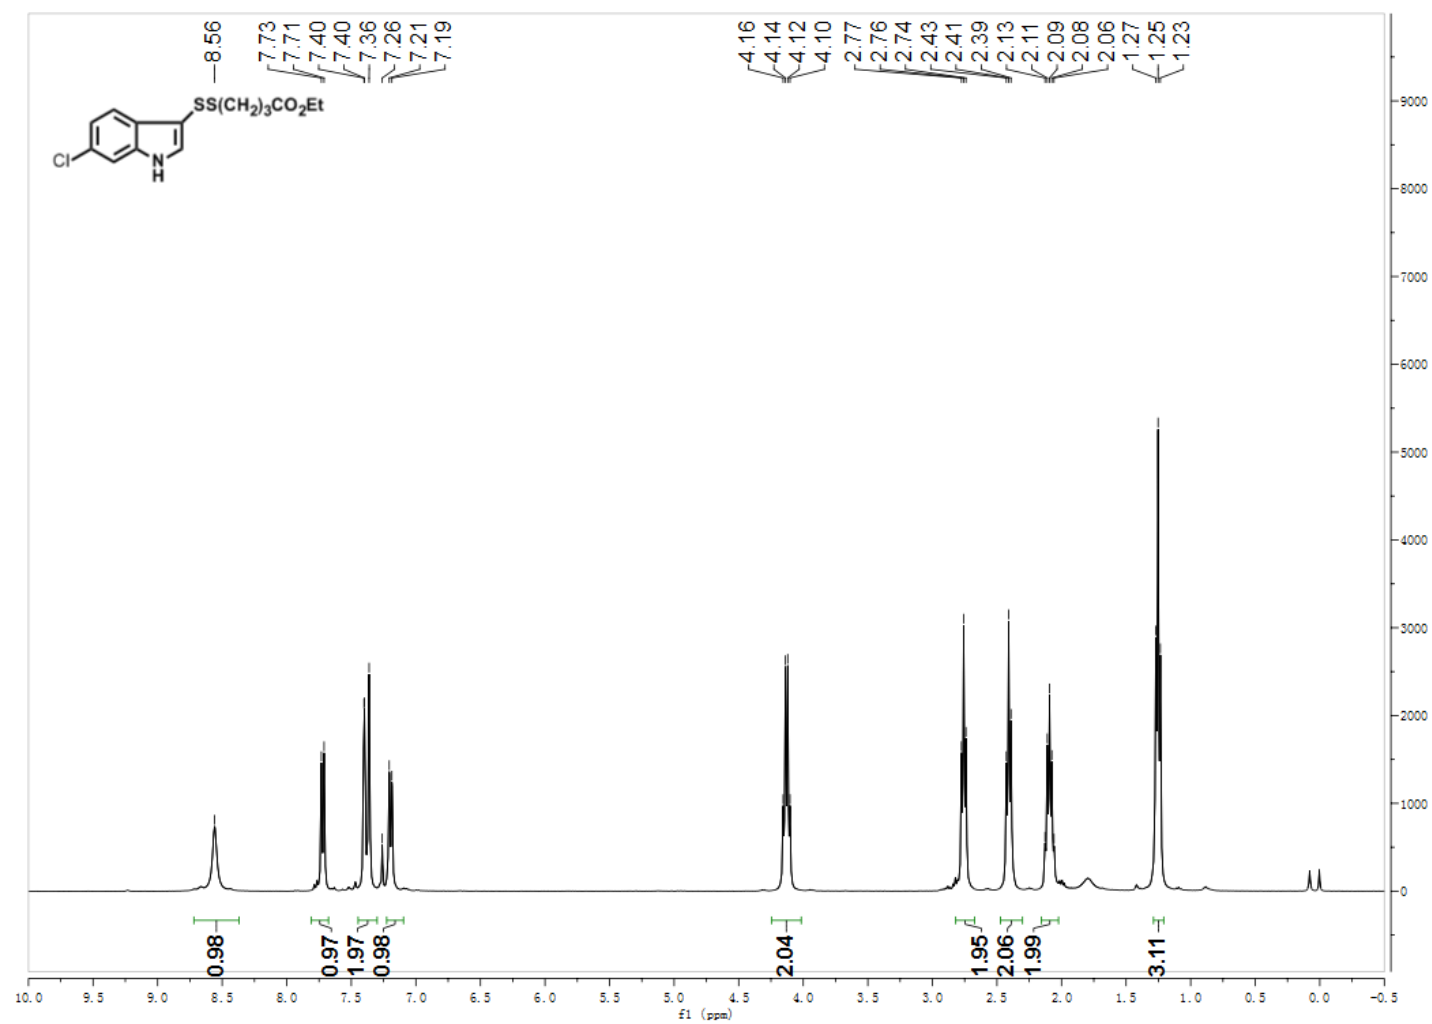

Supplementary Figure 94. <sup>1</sup>H NMR spectra for Compound 5i.

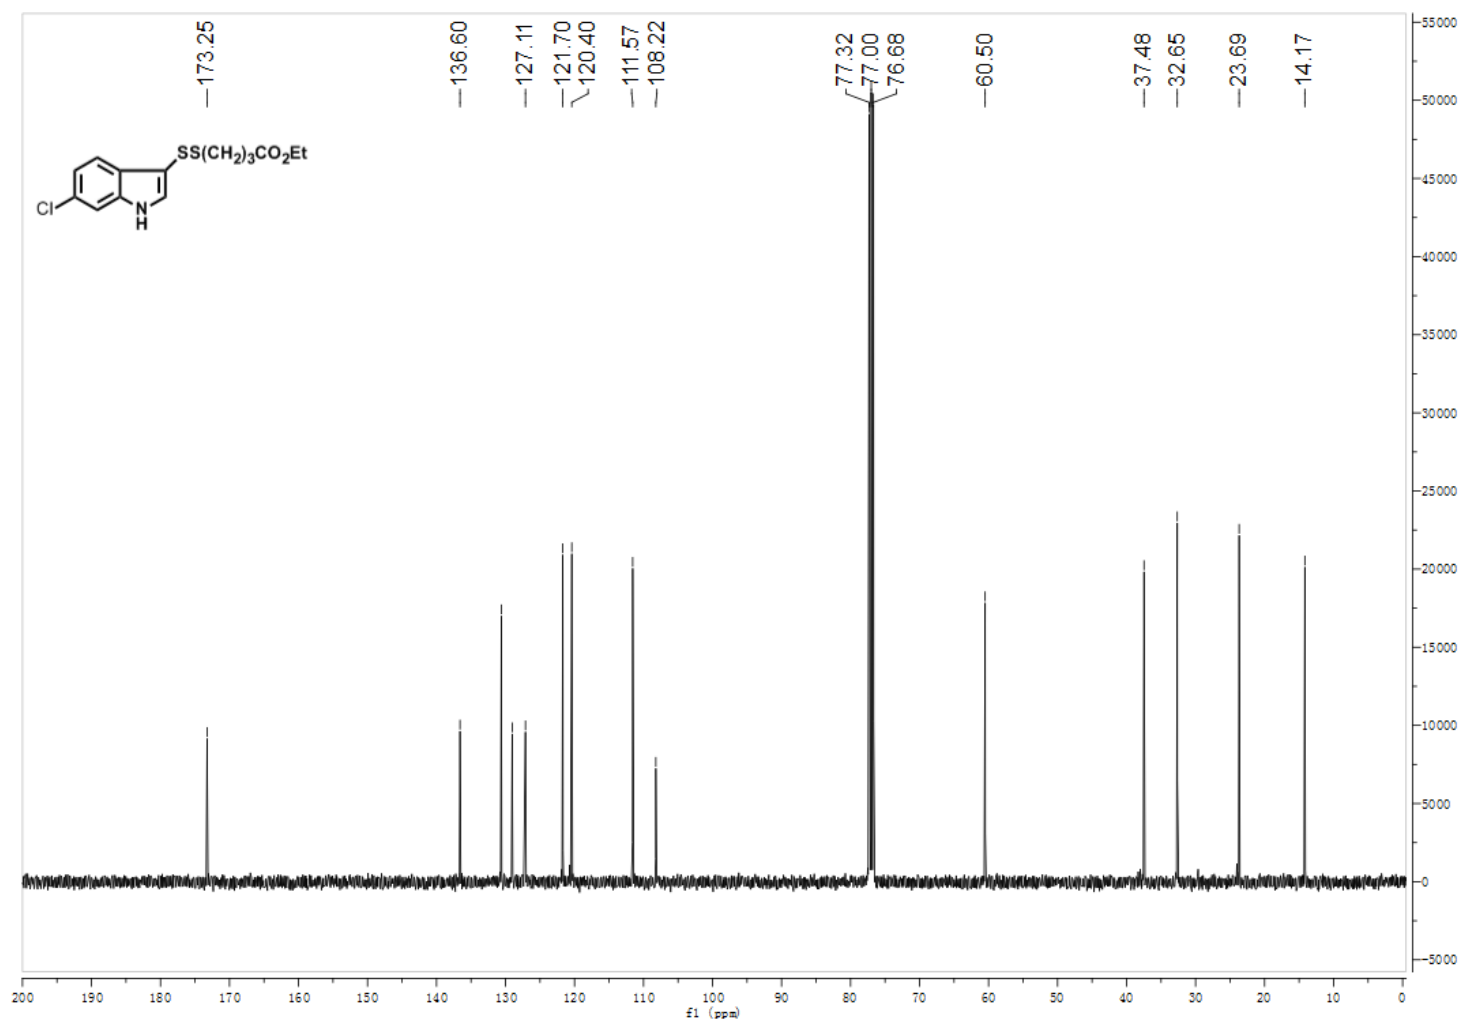

Supplementary Figure 95. <sup>13</sup>C NMR spectra for Compound 5i.

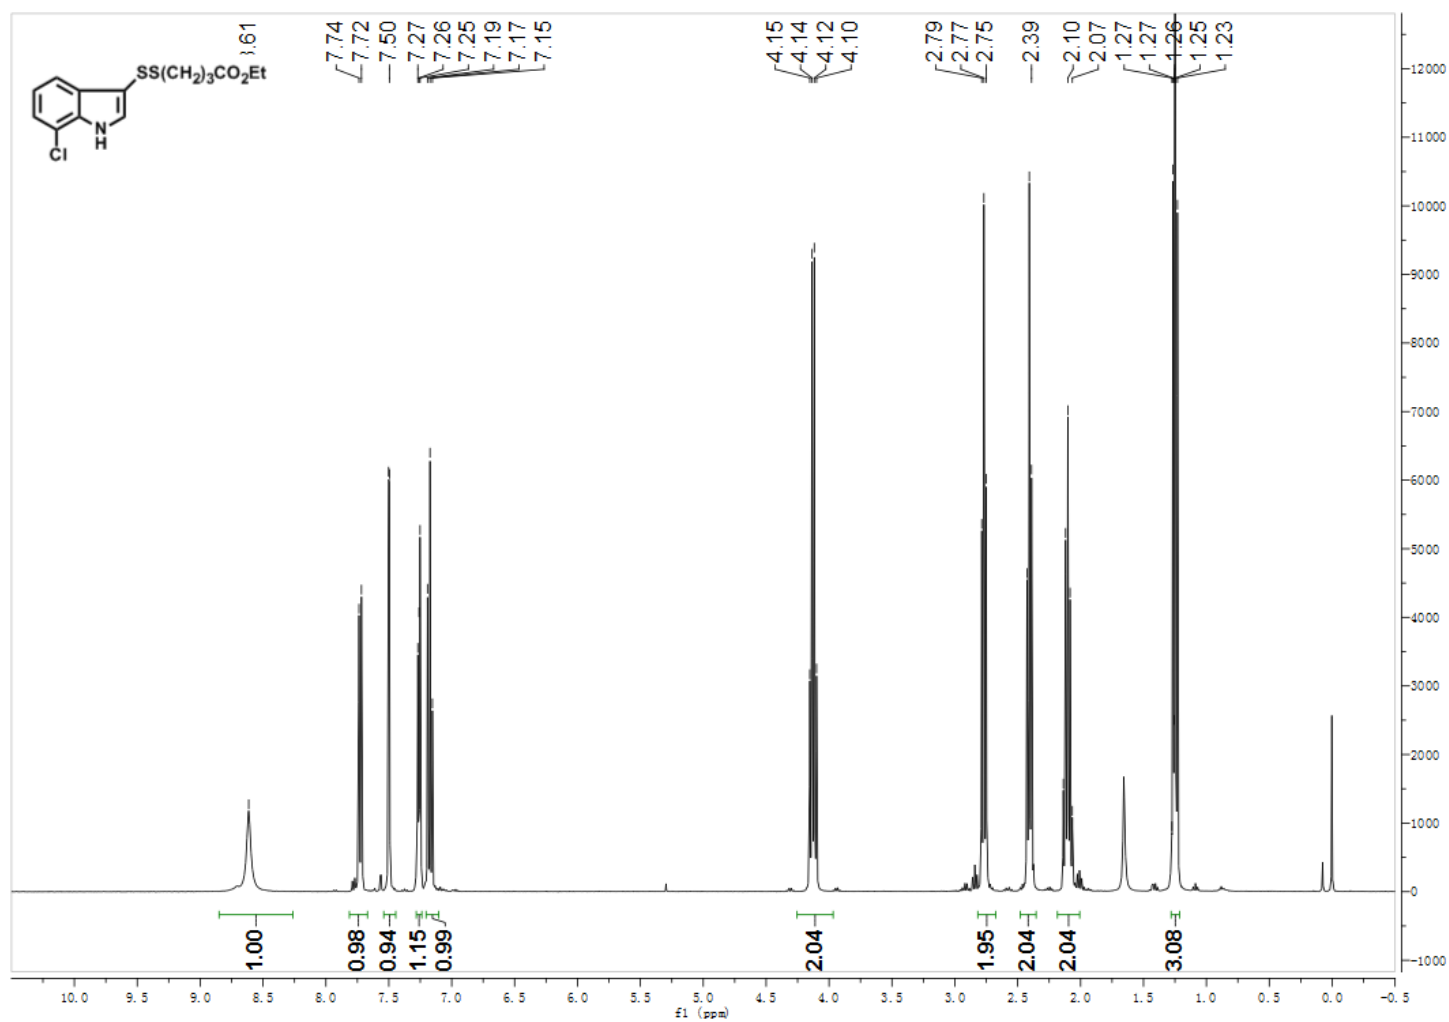

Supplementary Figure 96. <sup>1</sup>H NMR spectra for Compound 5j.

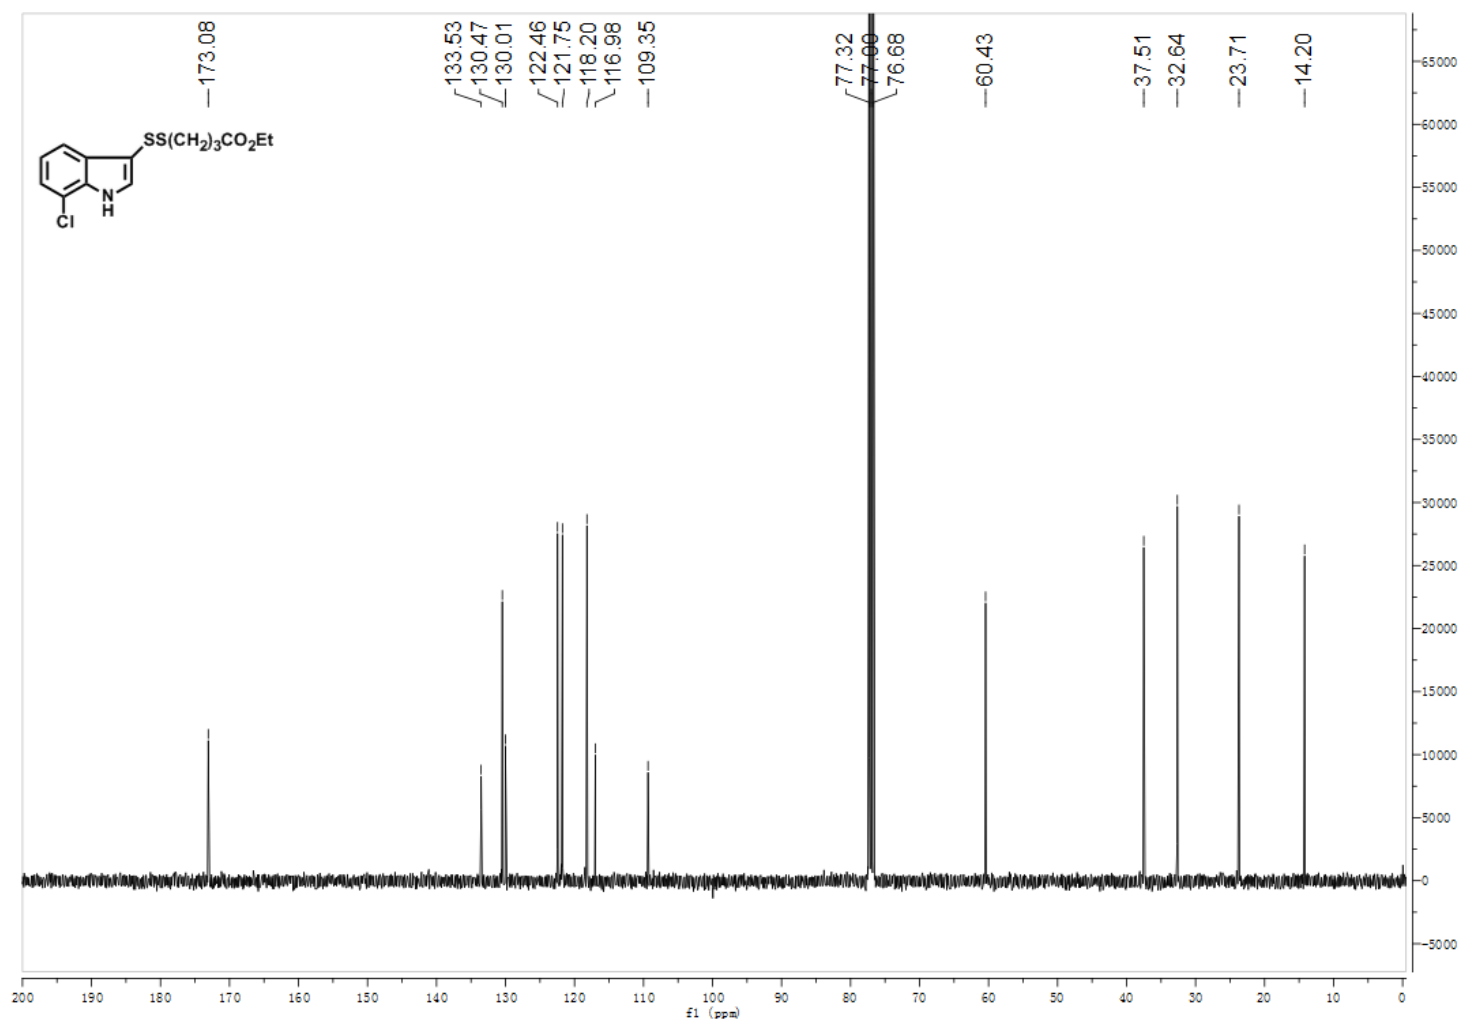

Supplementary Figure 97. <sup>13</sup>C NMR spectra for Compound 5j.

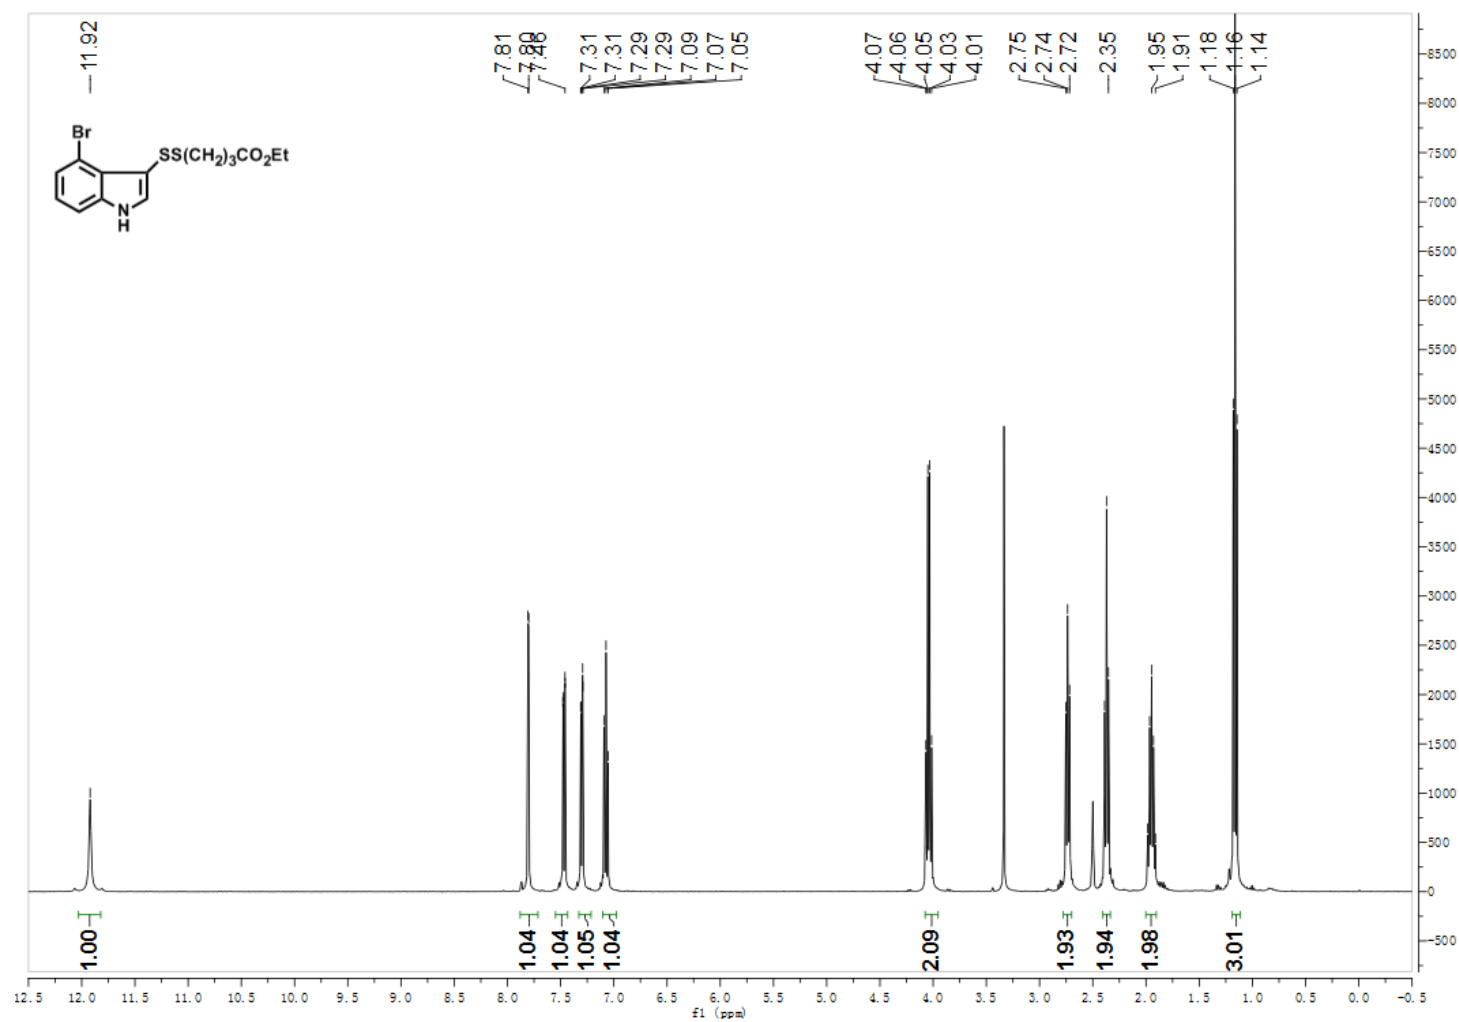

Supplementary Figure 98. <sup>1</sup>H NMR spectra for Compound 5k.

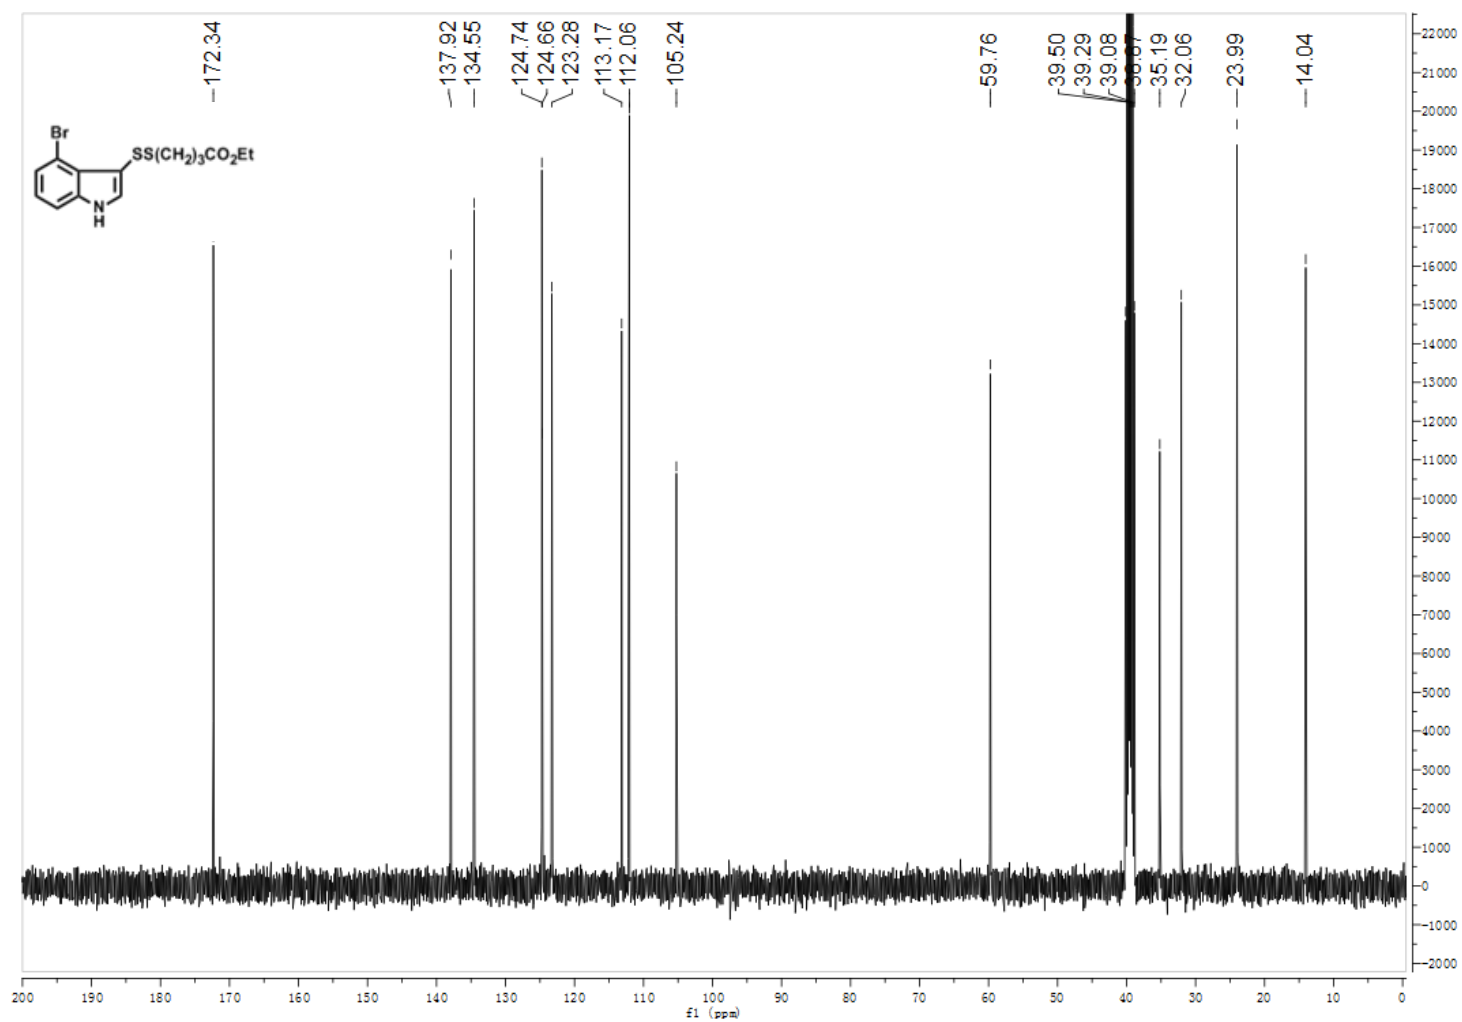

Supplementary Figure 99. <sup>13</sup>C NMR spectra for Compound 5k.

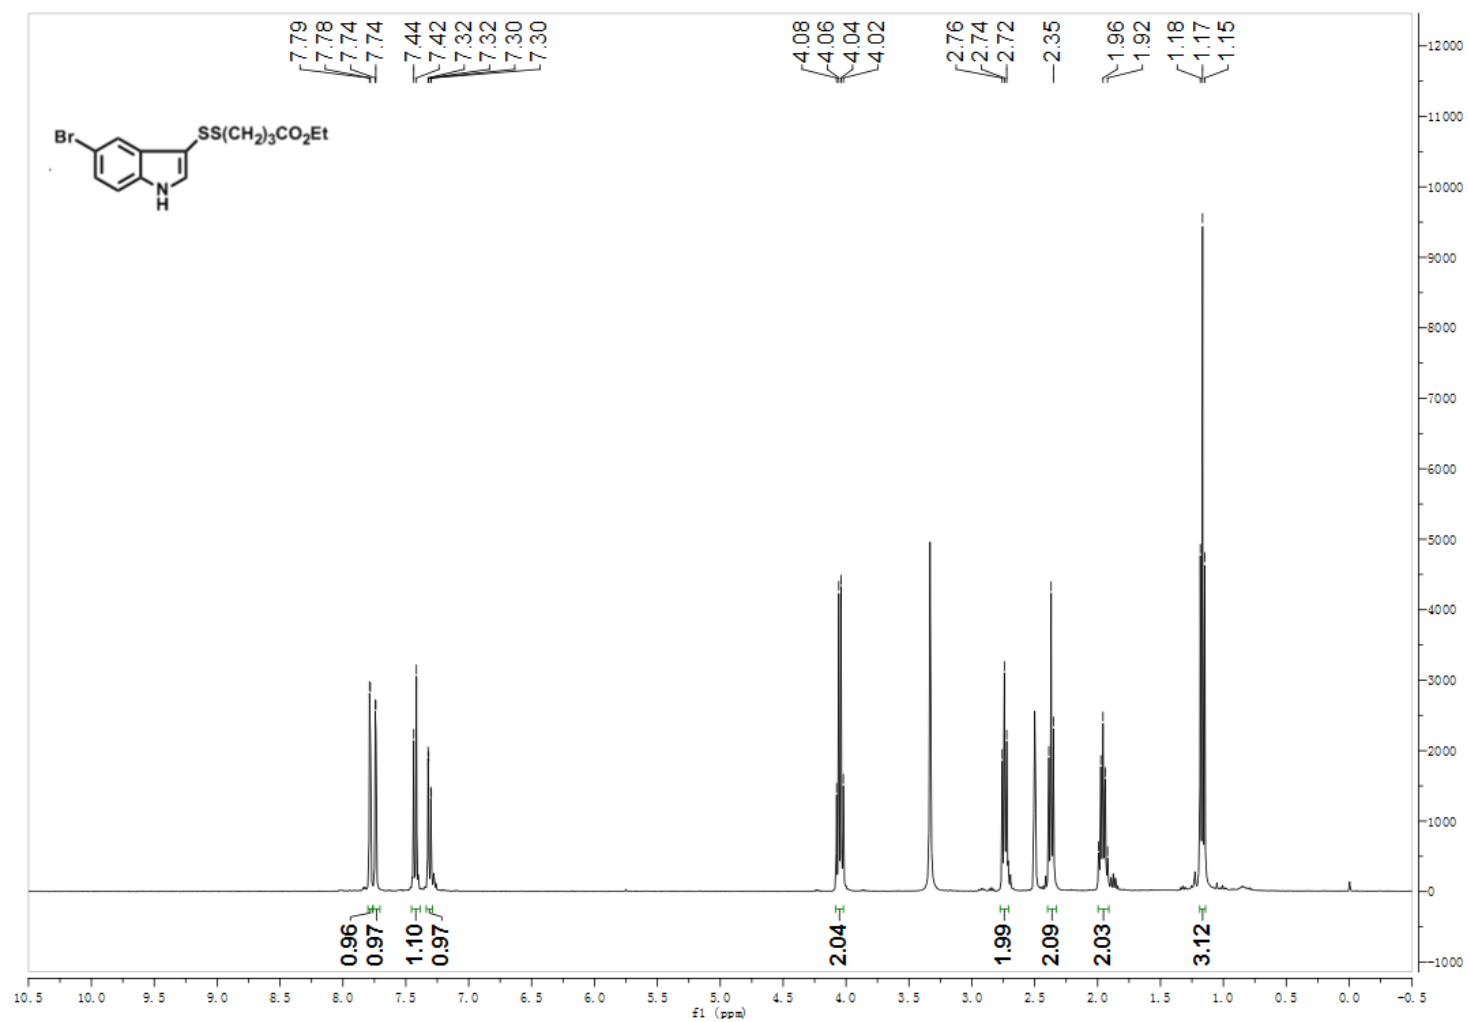

Supplementary Figure 100.  $^1\text{H}$  NMR spectra for Compound 5l.

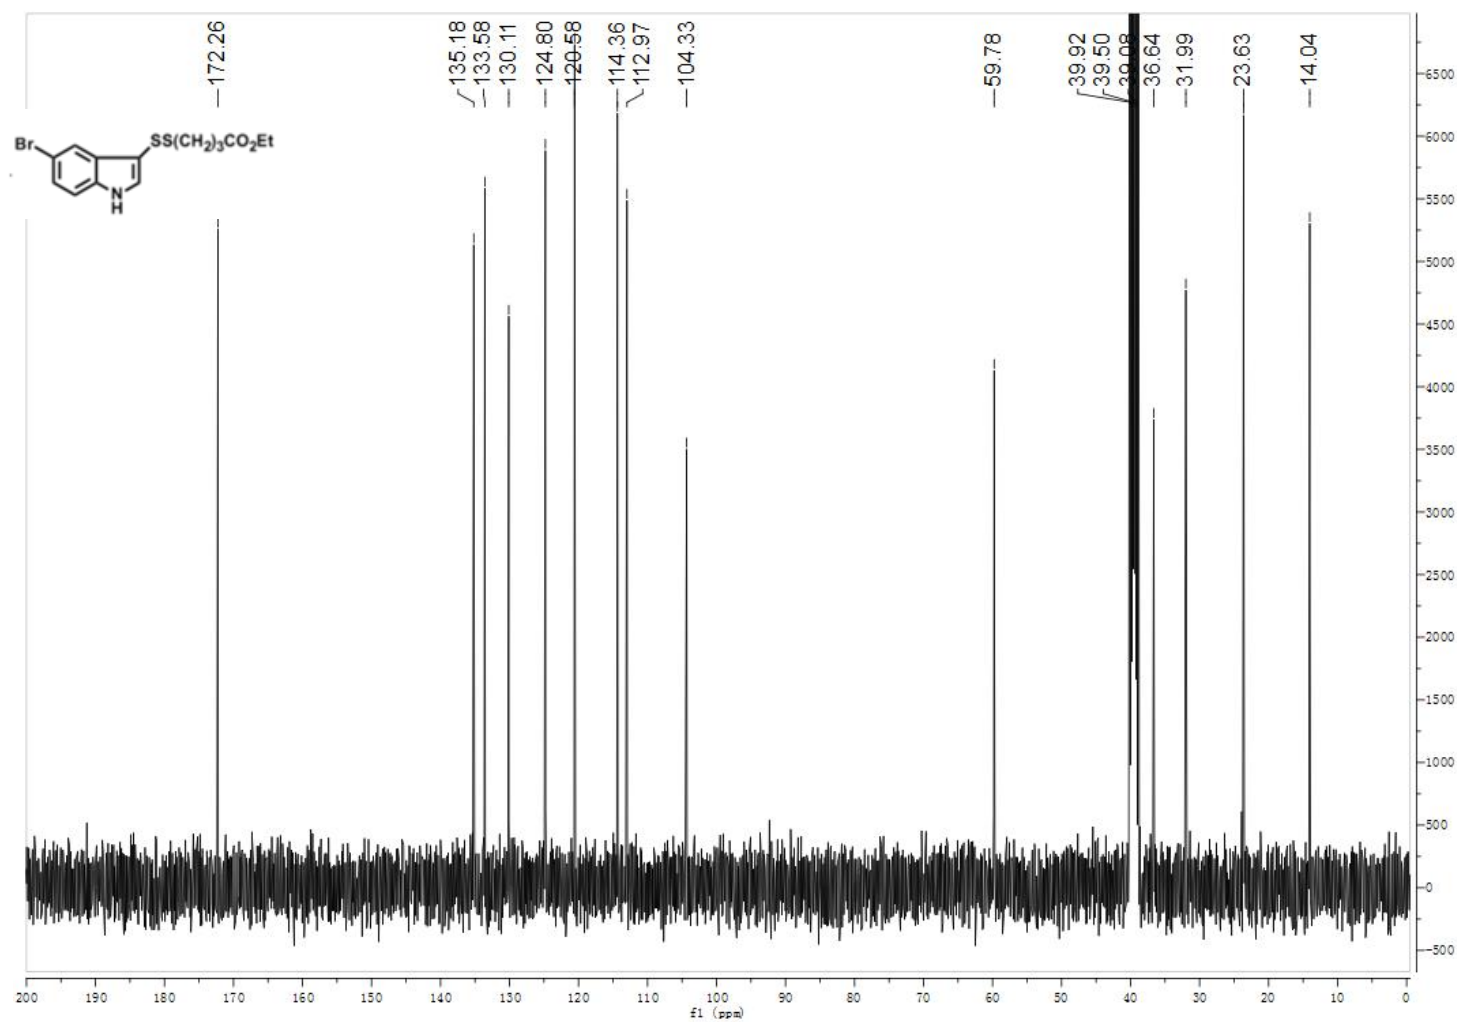

**Supplementary Figure 101.** <sup>13</sup>C NMR spectra for Compound 5l.

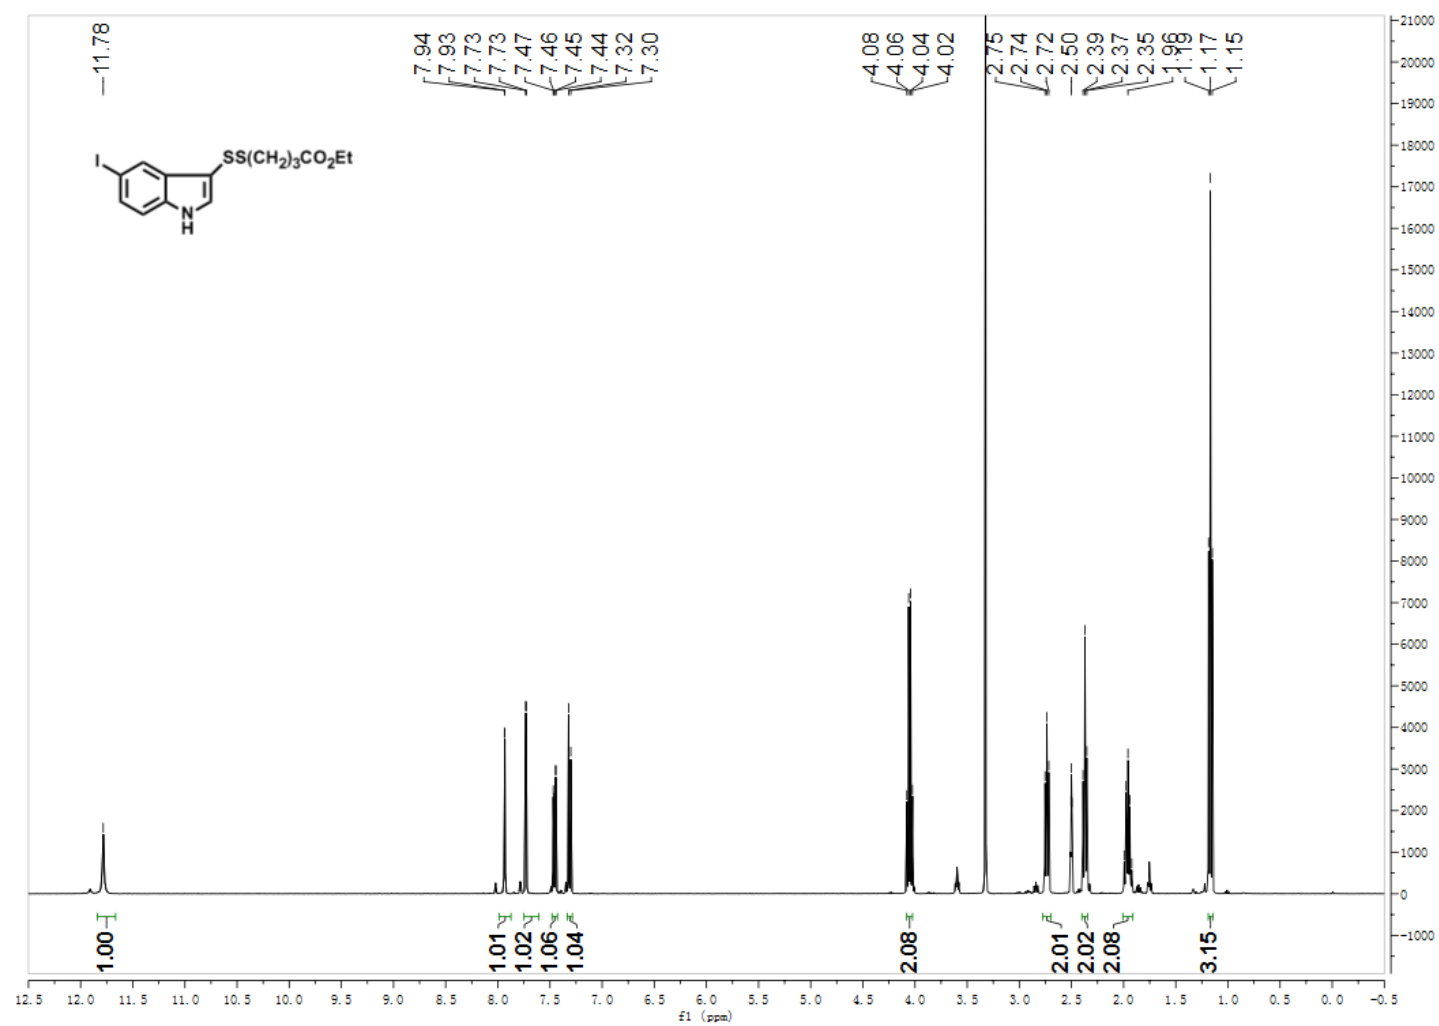

Supplementary Figure 102. <sup>1</sup>H NMR spectra for Compound 5m.

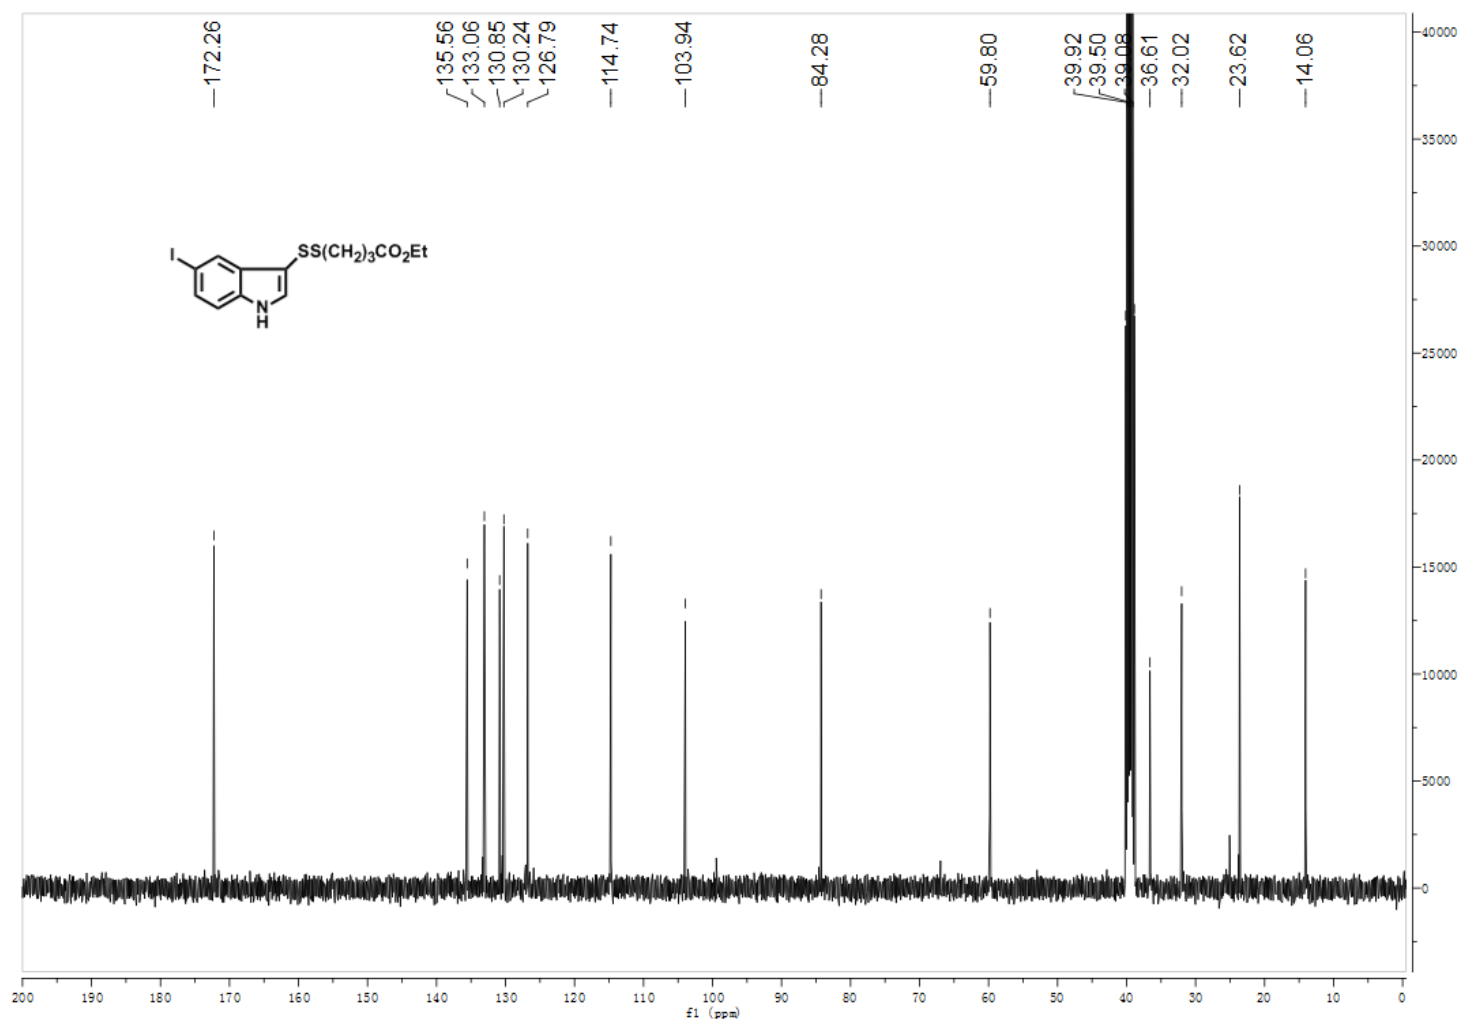

Supplementary Figure 103.  $^{13}\text{C}$  NMR spectra for Compound **5m**.

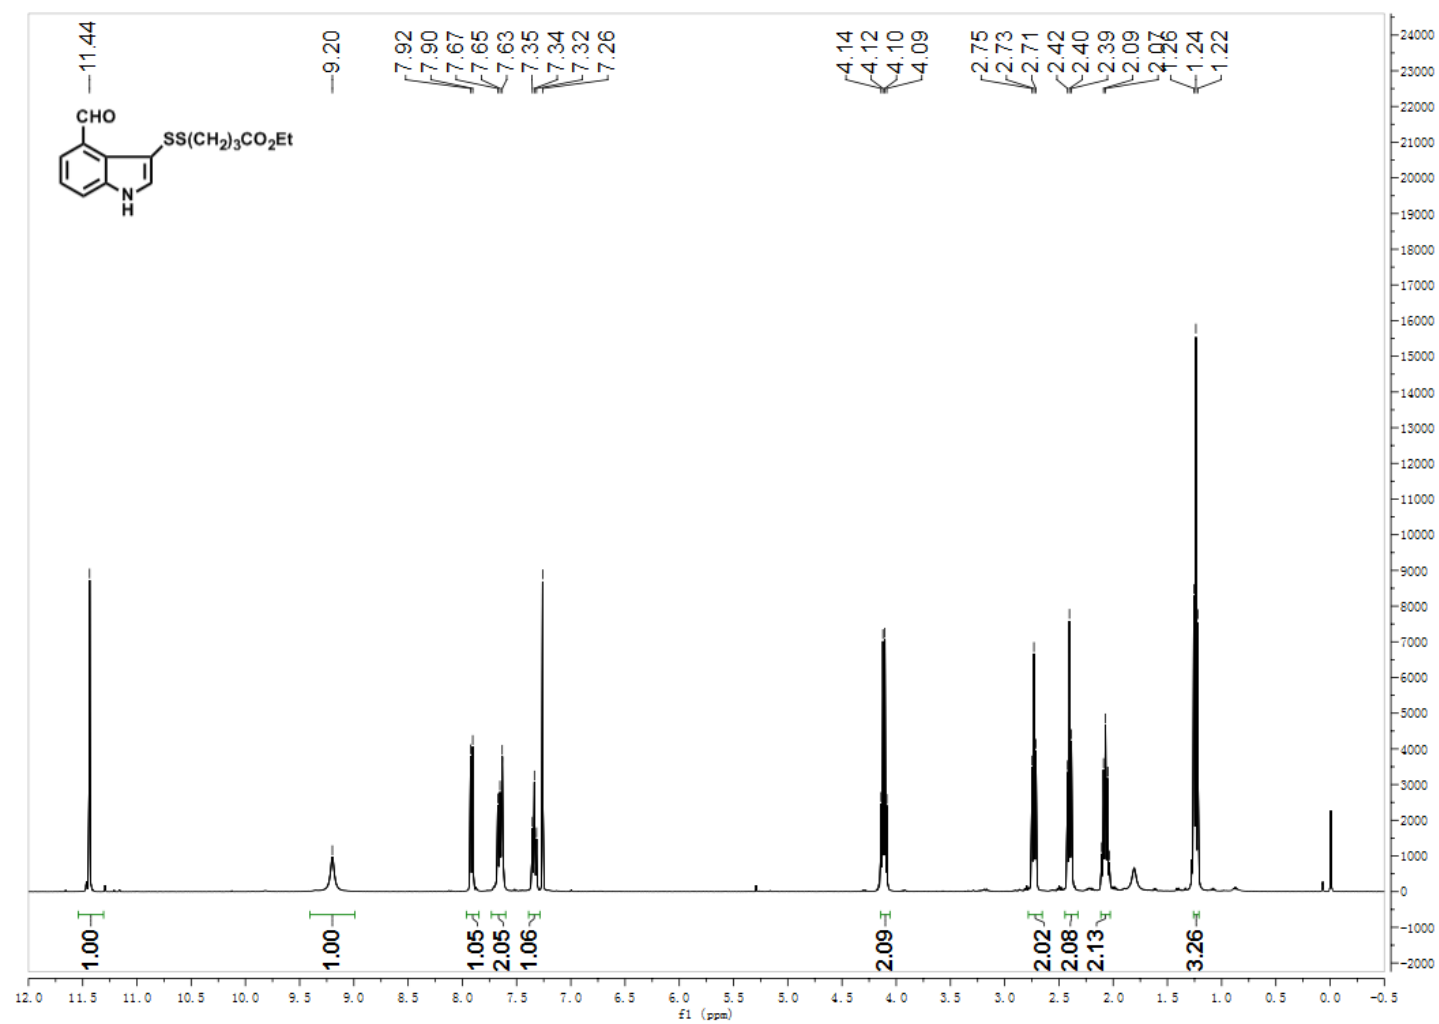

Supplementary Figure 104. <sup>1</sup>H NMR spectra for Compound **5n**.

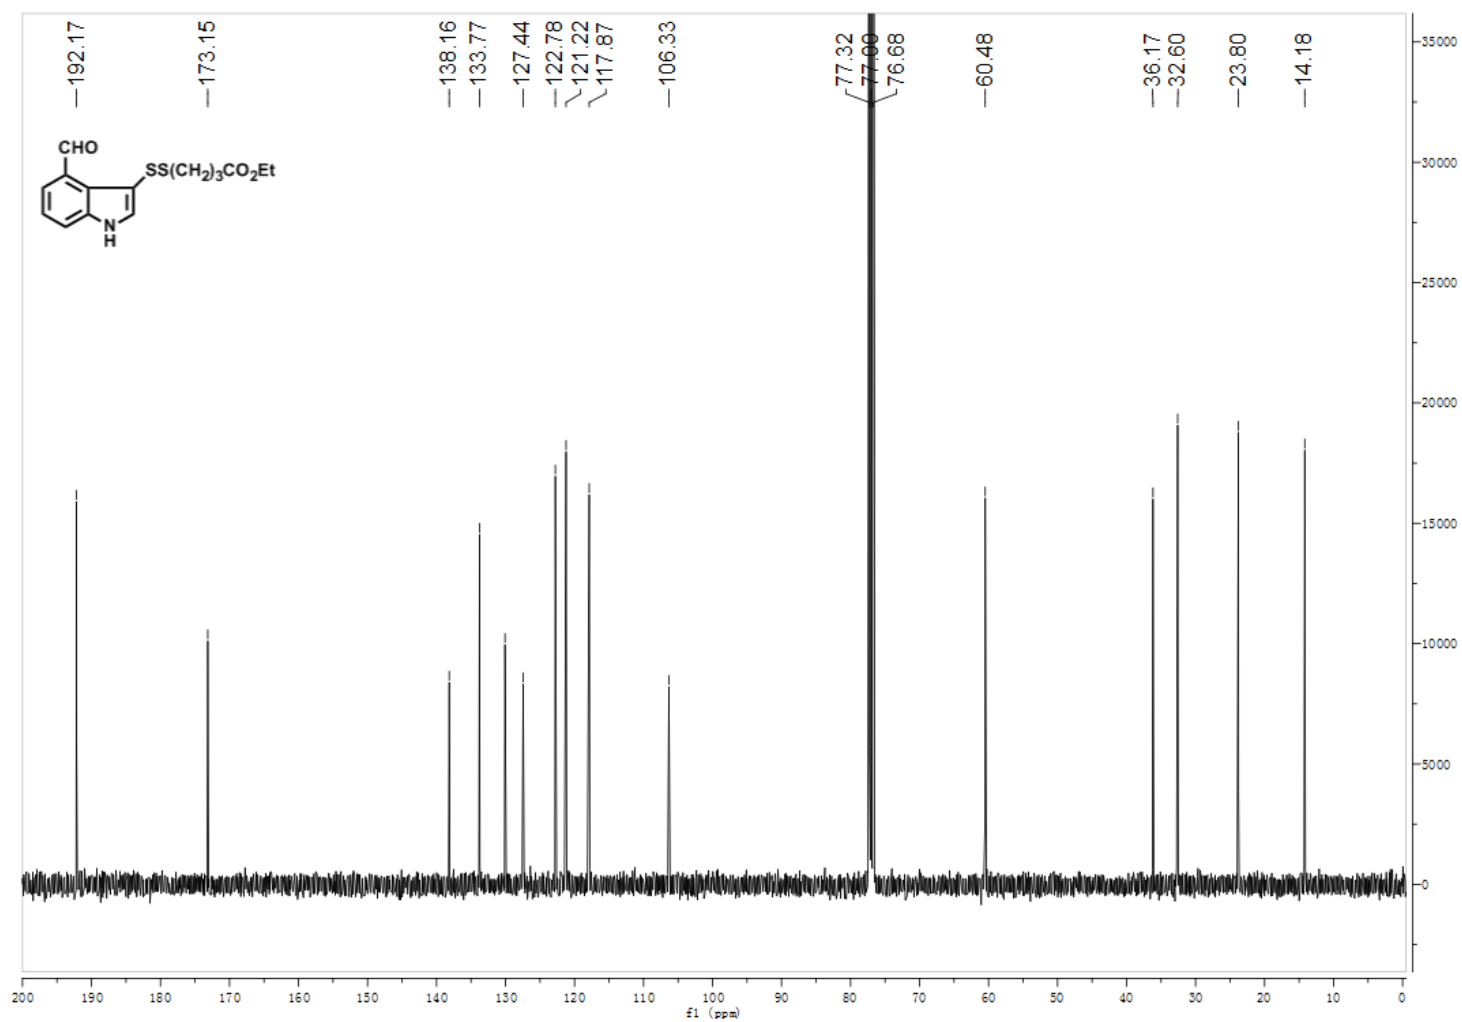

Supplementary Figure 105.  $^{13}\text{C}$  NMR spectra for Compound 5n.

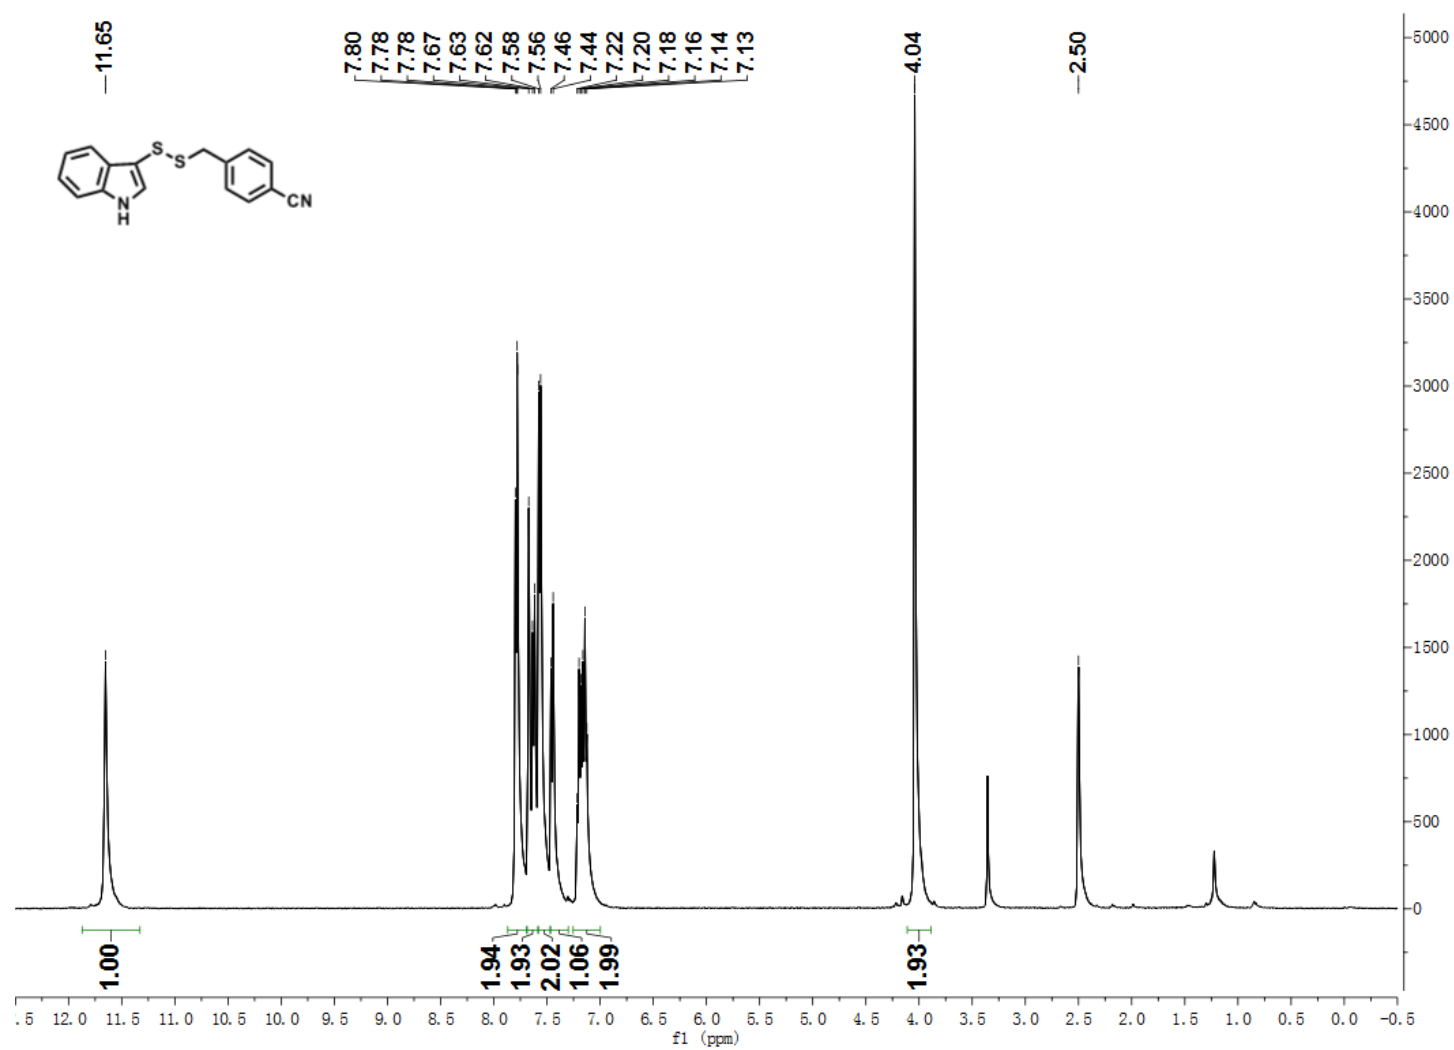

Supplementary Figure 106. <sup>1</sup>H NMR spectra for Compound 5o.

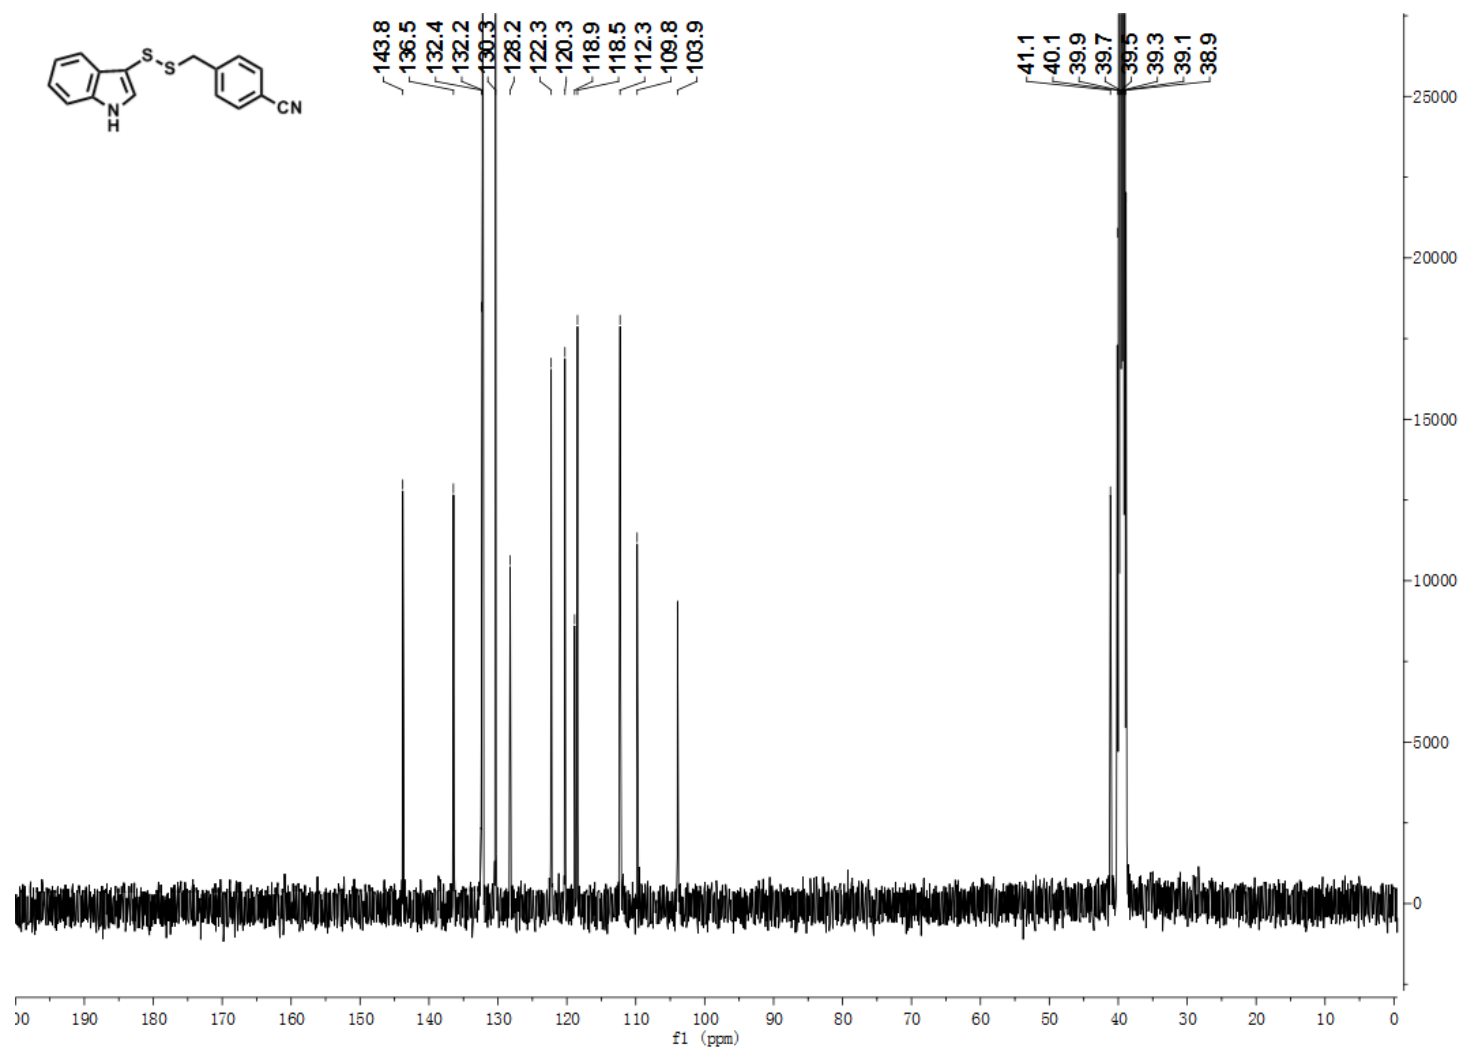

**Supplementary Figure 107.** <sup>13</sup>C NMR spectra for Compound 5o.

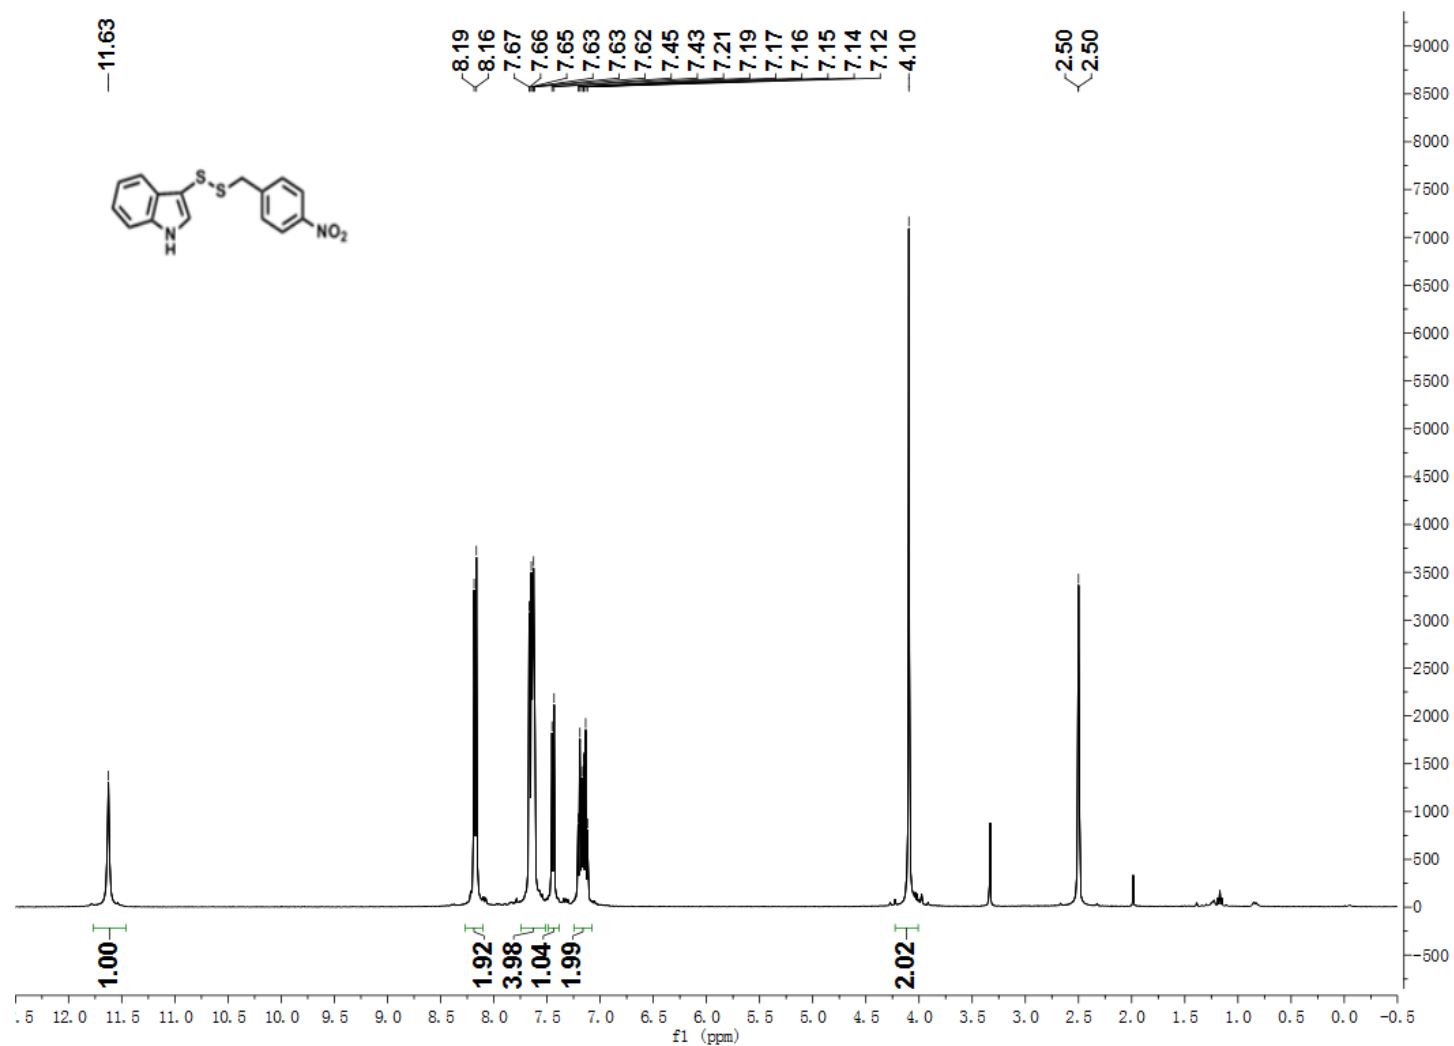

Supplementary Figure 108. <sup>1</sup>H NMR spectra for Compound 5p.

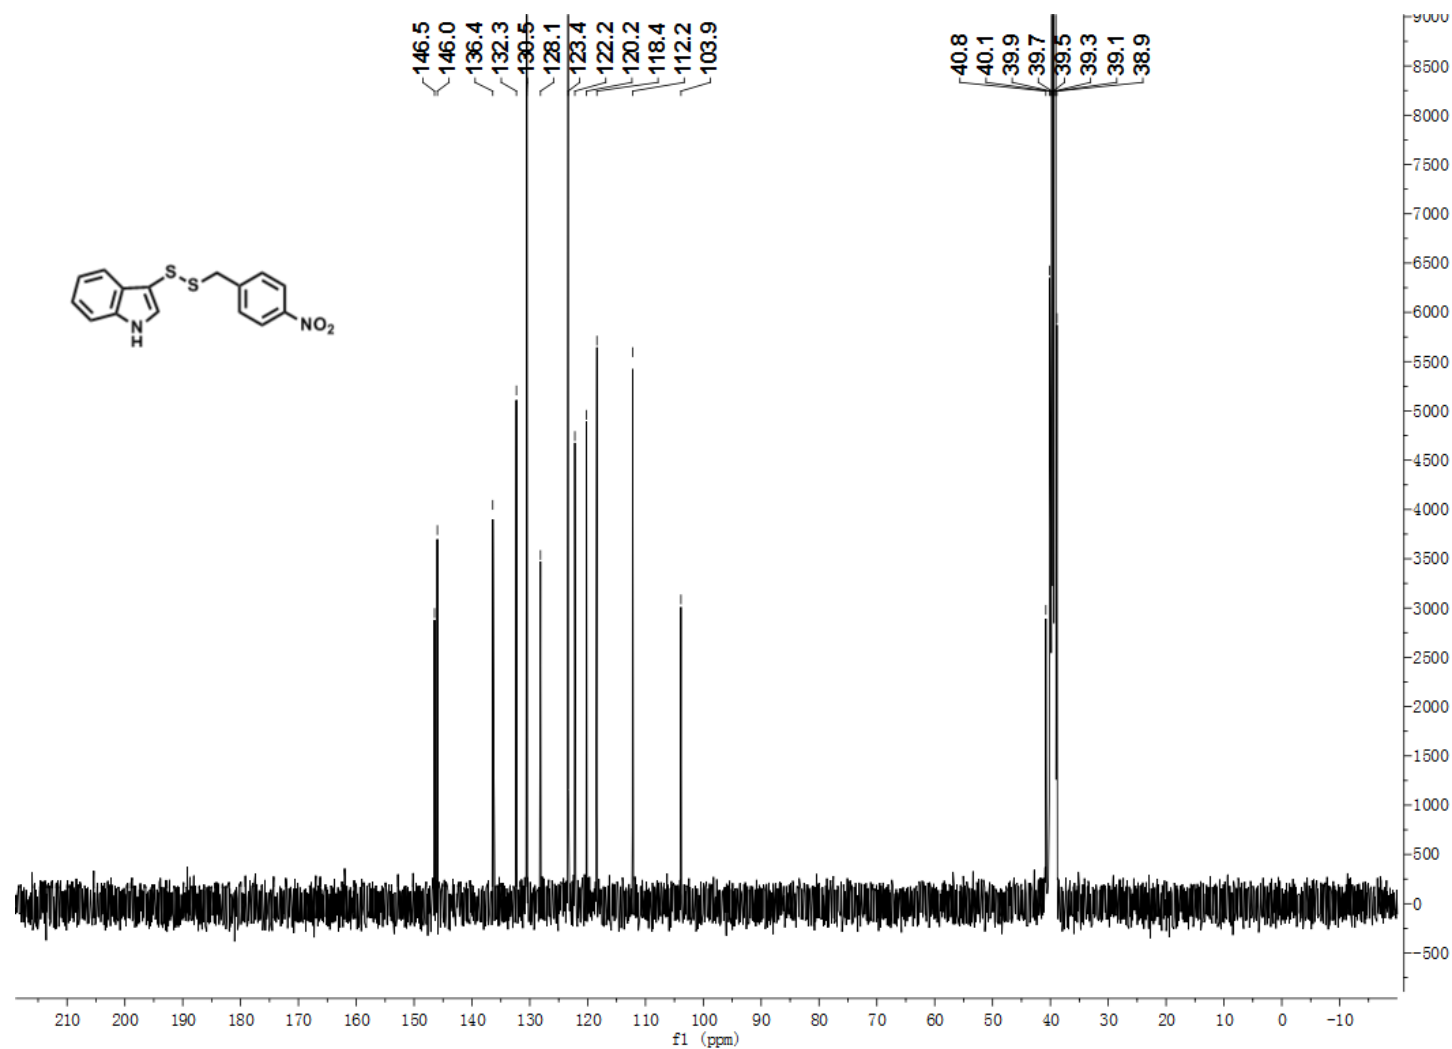

Supplementary Figure 109. <sup>13</sup>C NMR spectra for Compound 5p.

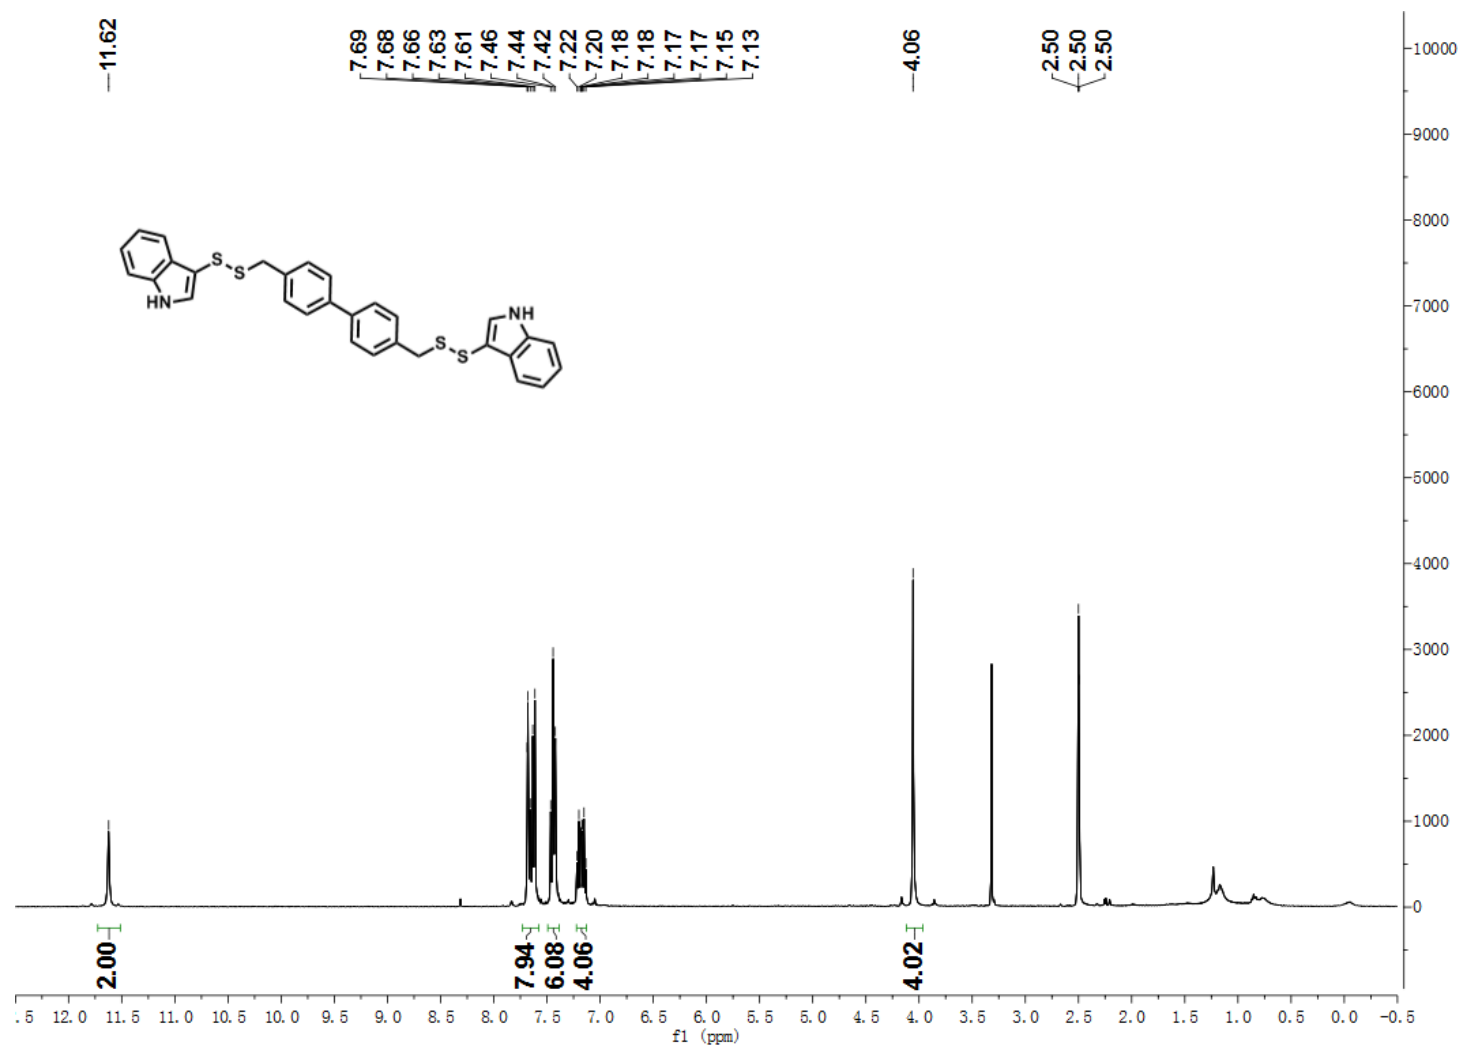

Supplementary Figure 110. <sup>1</sup>H NMR spectra for Compound 5q.

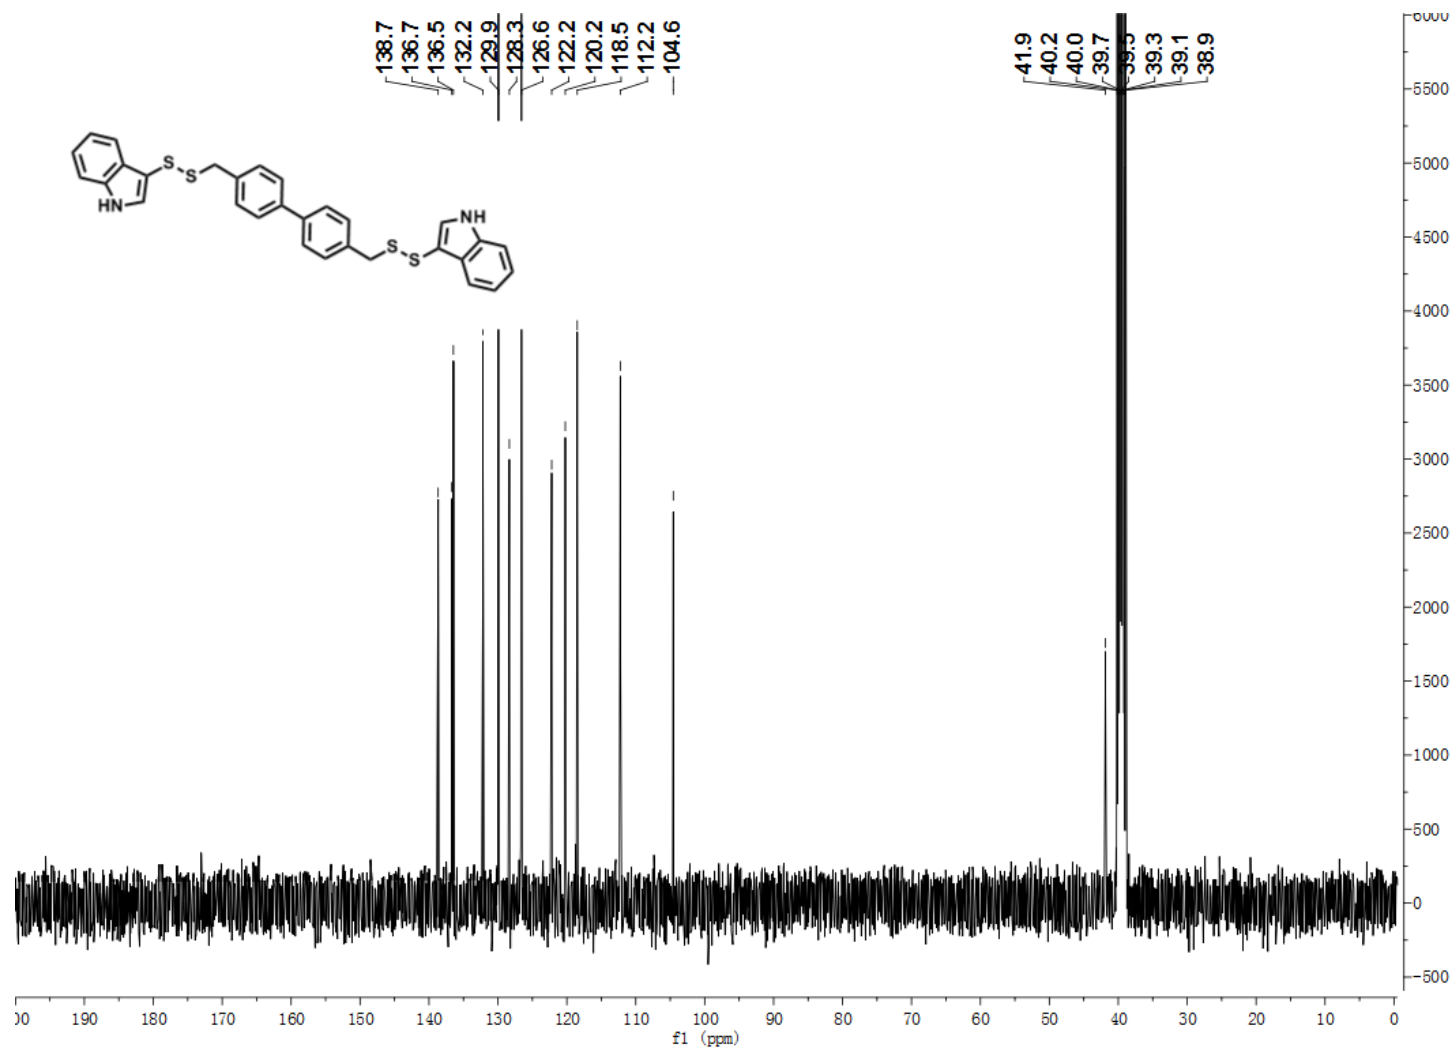

Supplementary Figure 111. <sup>13</sup>C NMR spectra for Compound 5q.

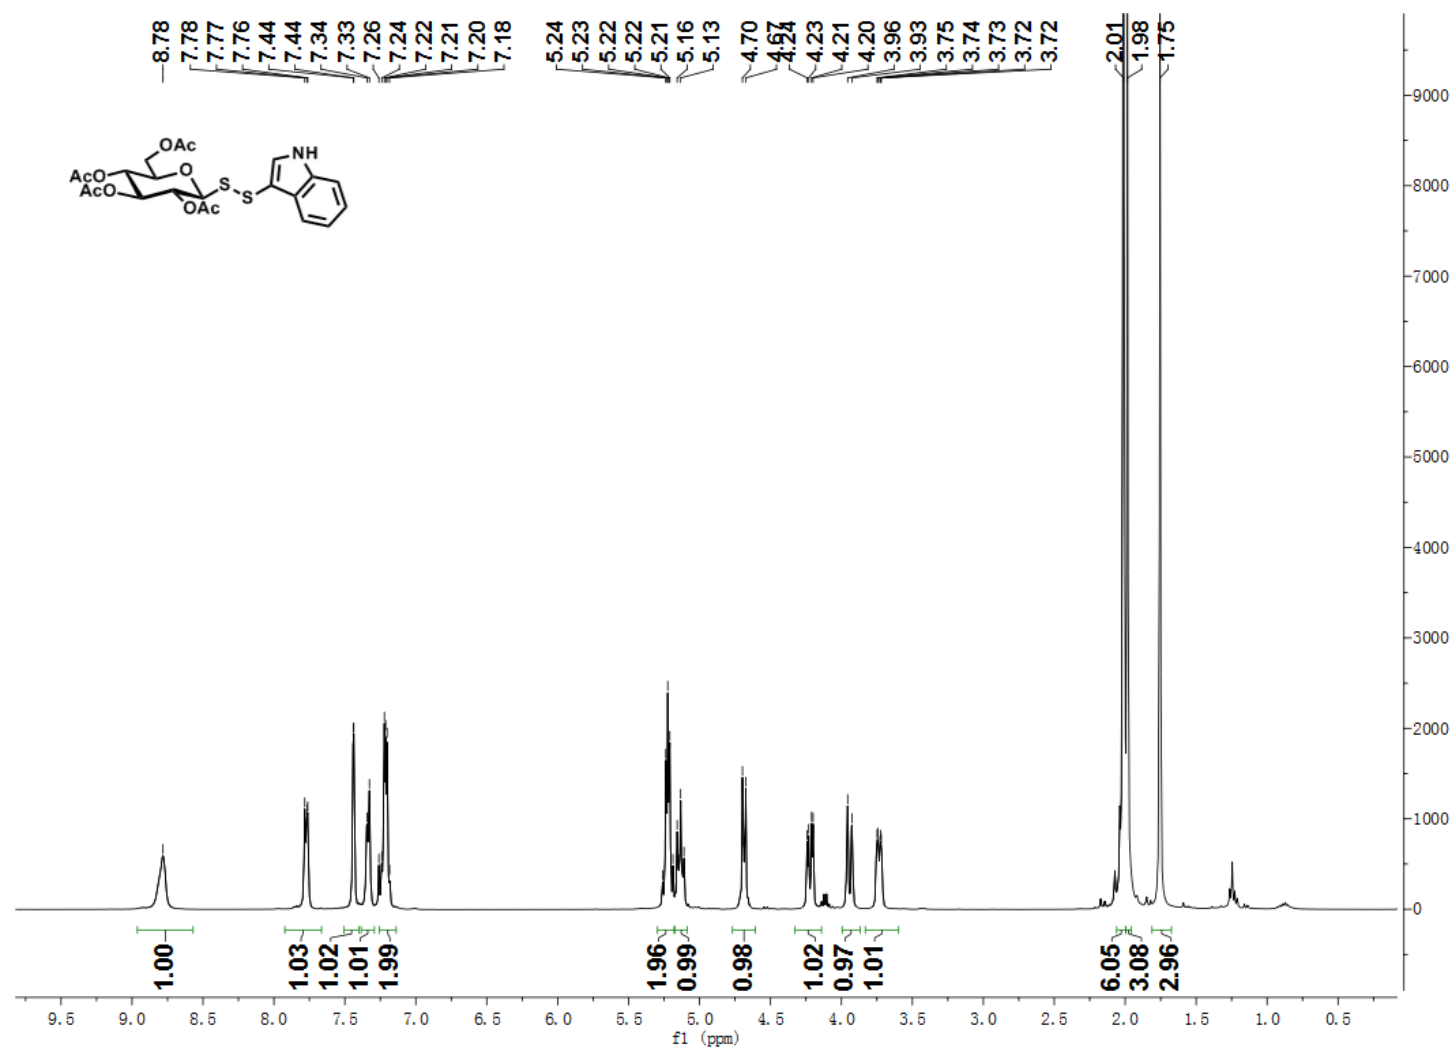

Supplementary Figure 112. <sup>1</sup>H NMR spectra for Compound 5r.

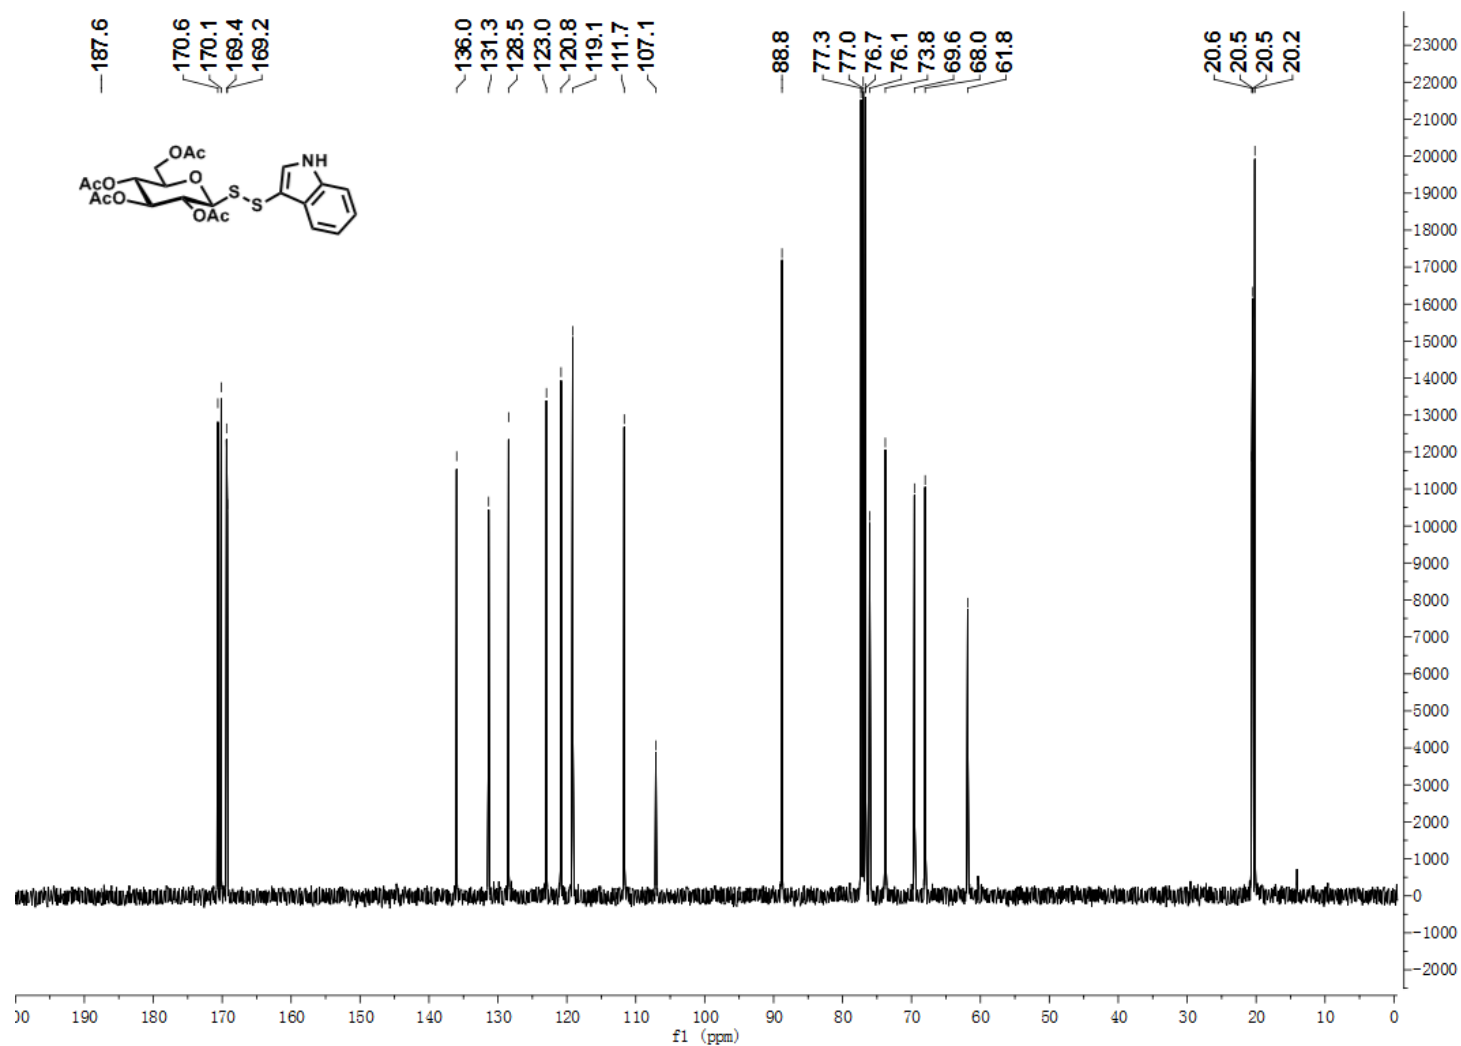

Supplementary Figure 113. <sup>13</sup>C NMR spectra for Compound 5r.

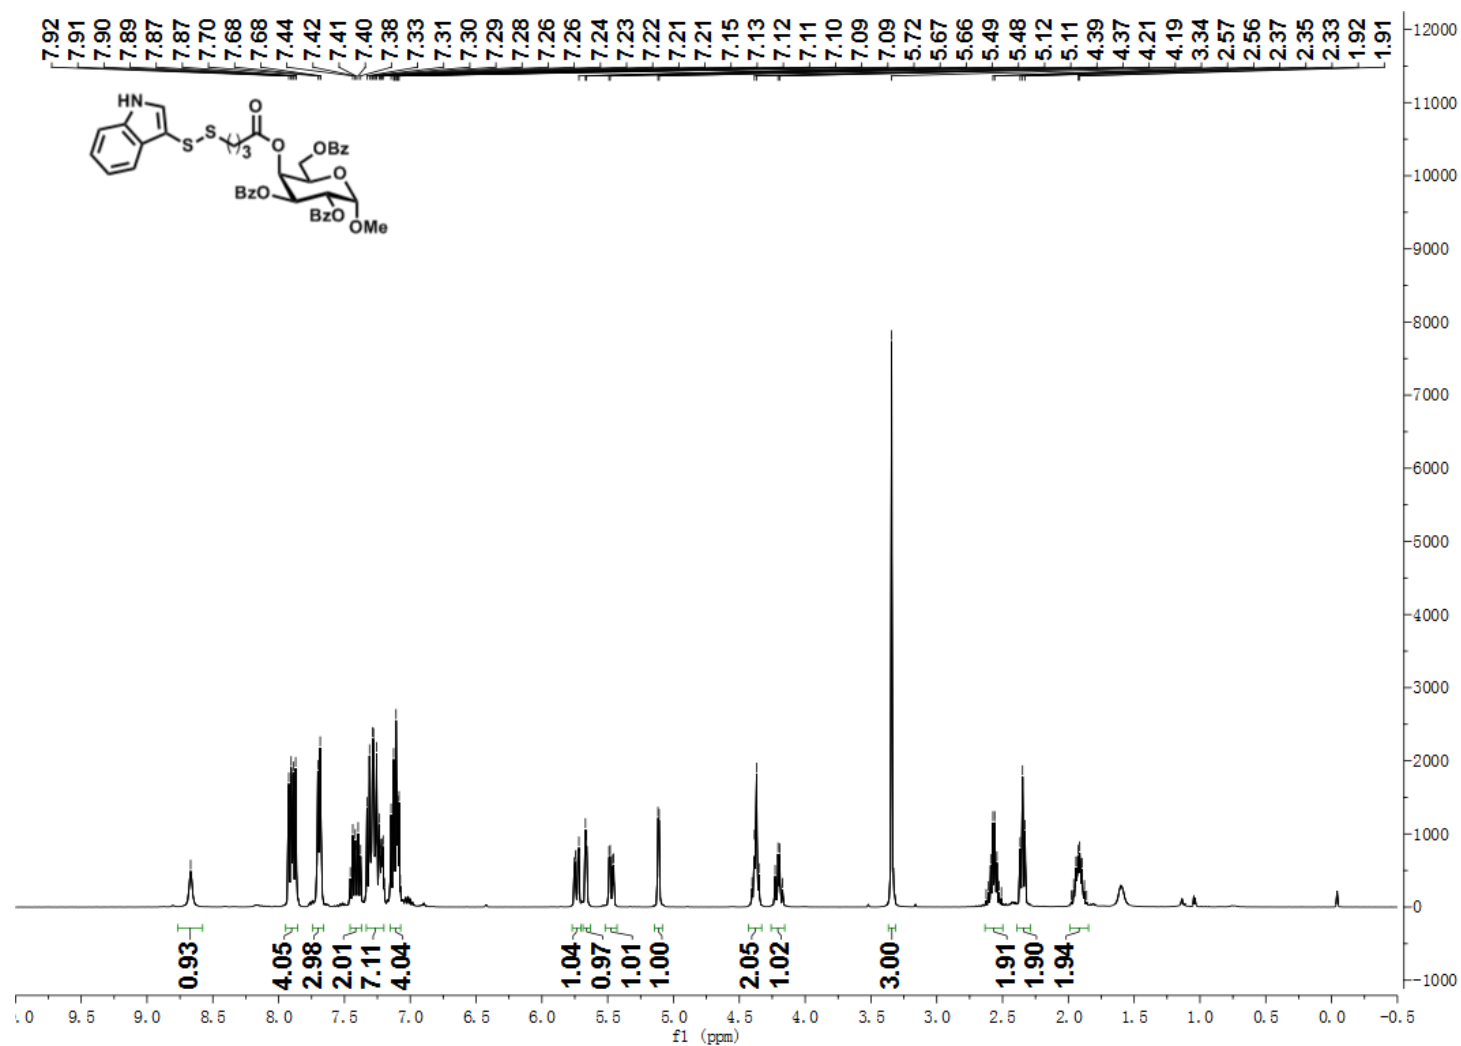

Supplementary Figure 114.  $^1\text{H}$  NMR spectra for Compound 5s.

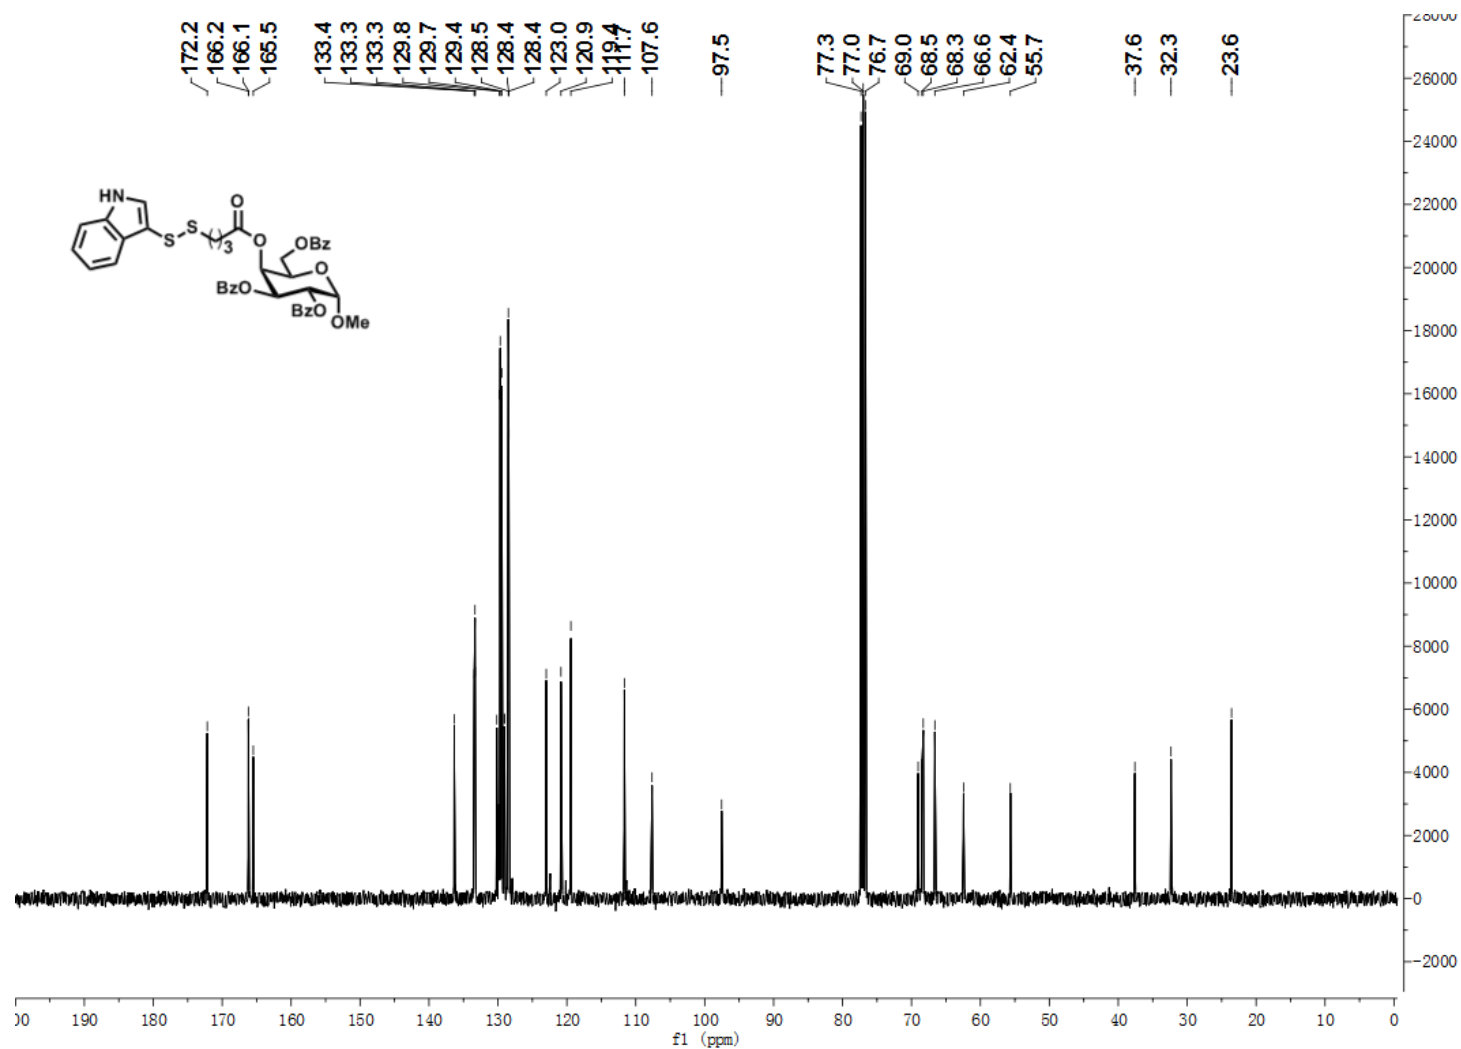

**Supplementary Figure 115.** <sup>13</sup>C NMR spectra for Compound 5s.

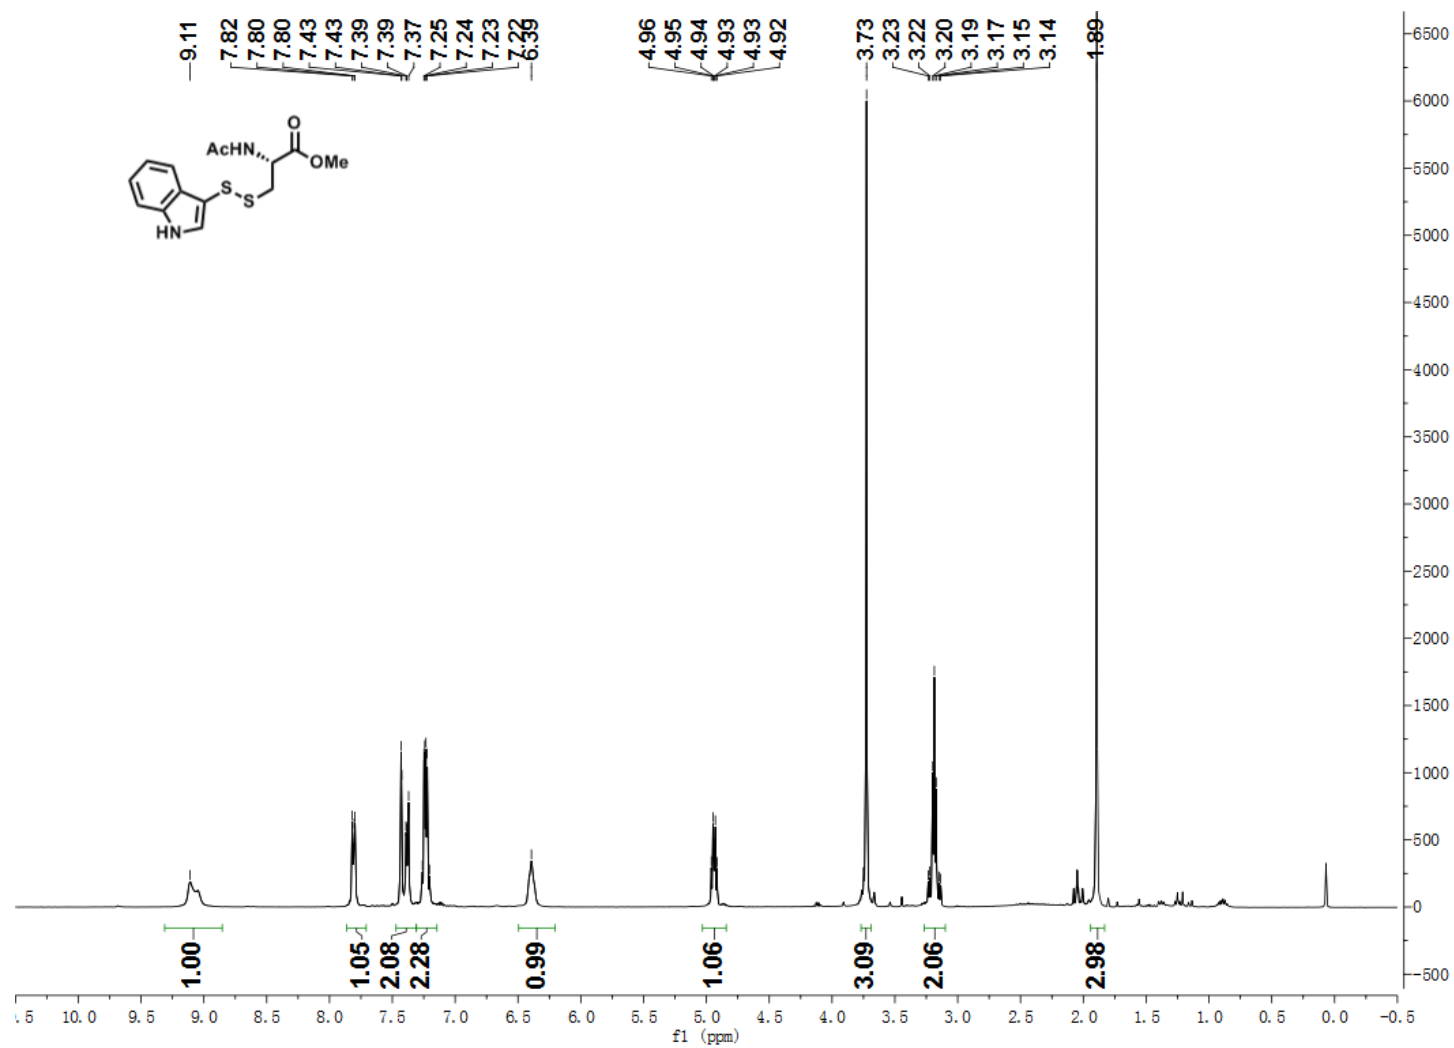

Supplementary Figure 116. <sup>1</sup>H NMR spectra for Compound 5t.

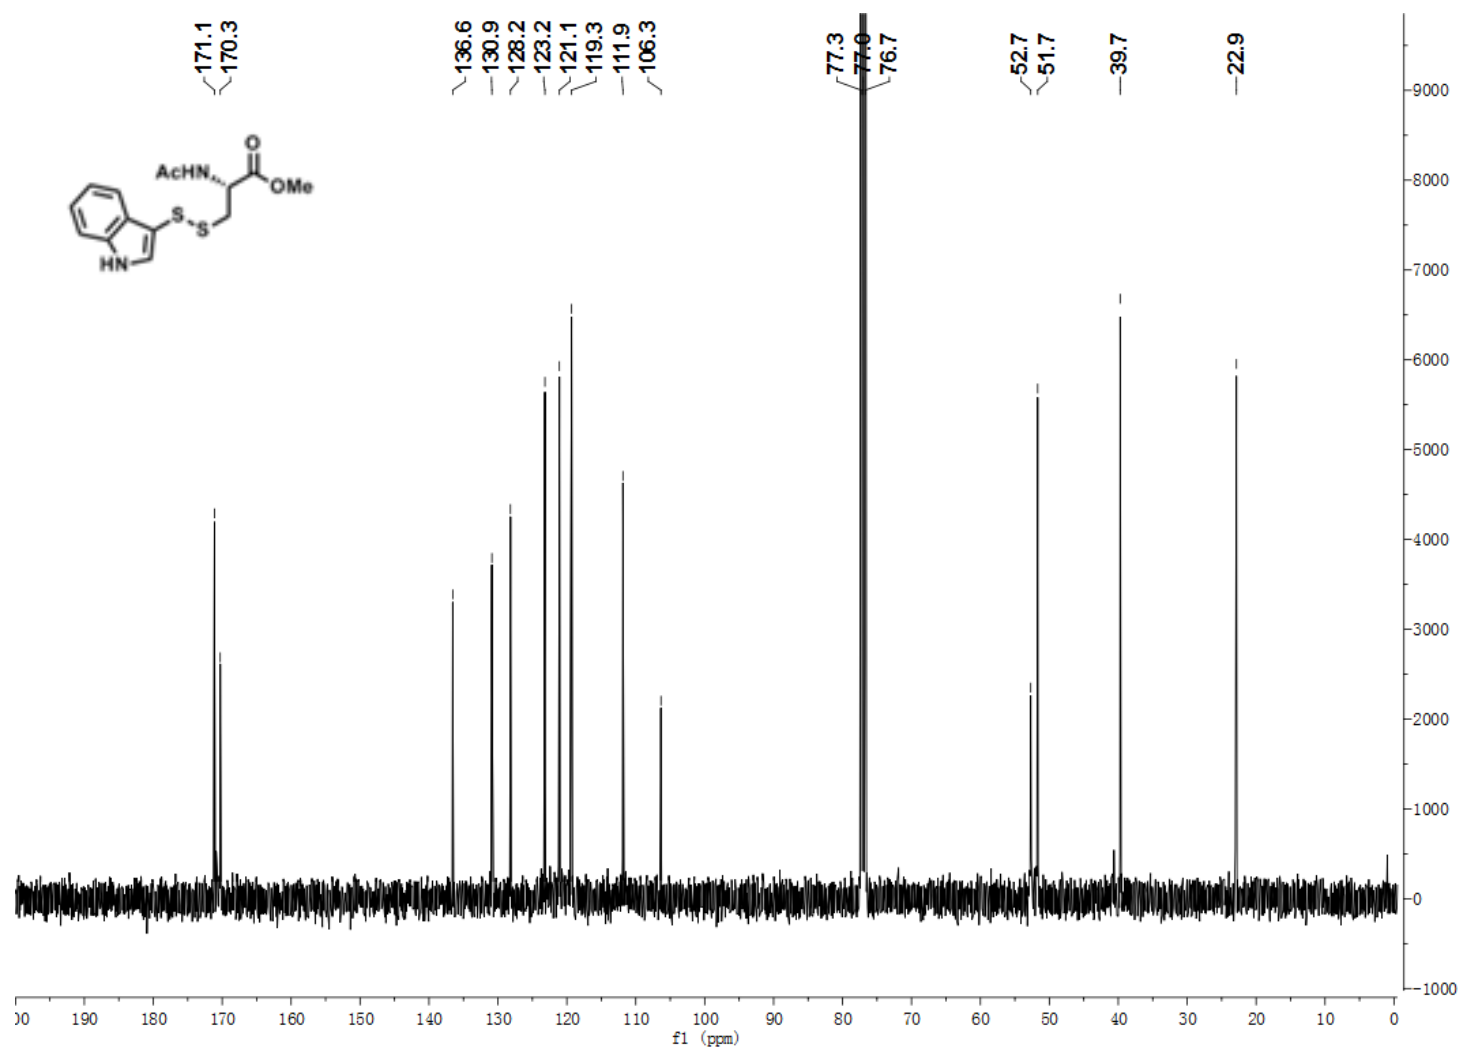

**Supplementary Figure 117.**  $^{13}\text{C}$  NMR spectra for Compound 5t.

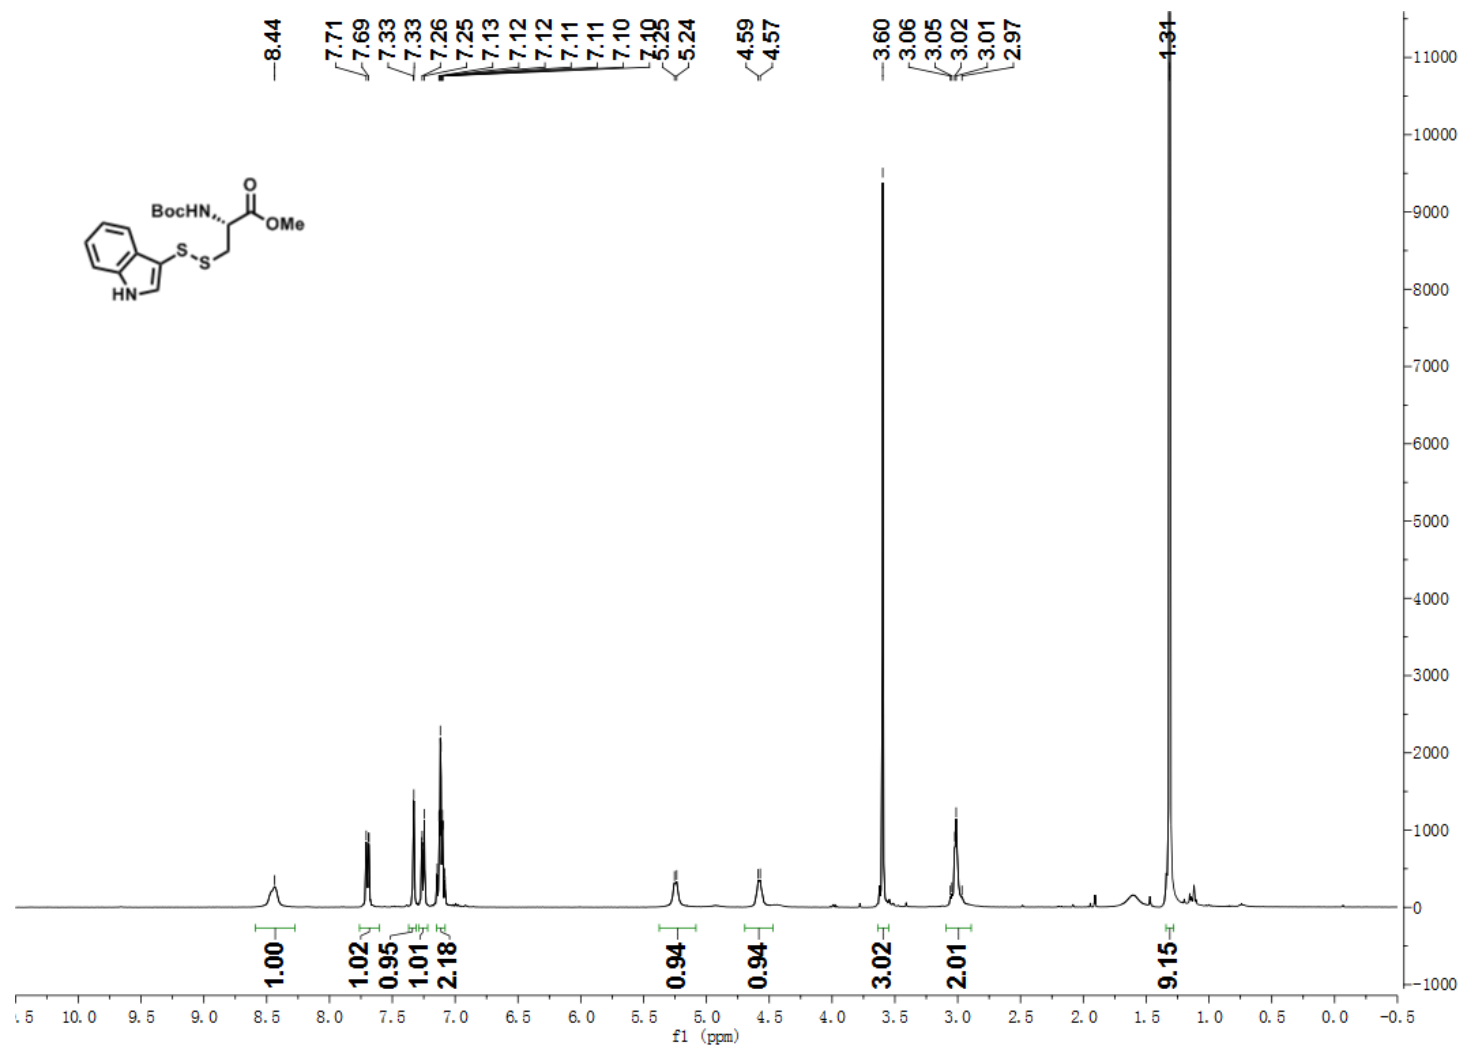

Supplementary Figure 118.  $^1\text{H}$  NMR spectra for Compound 5u.

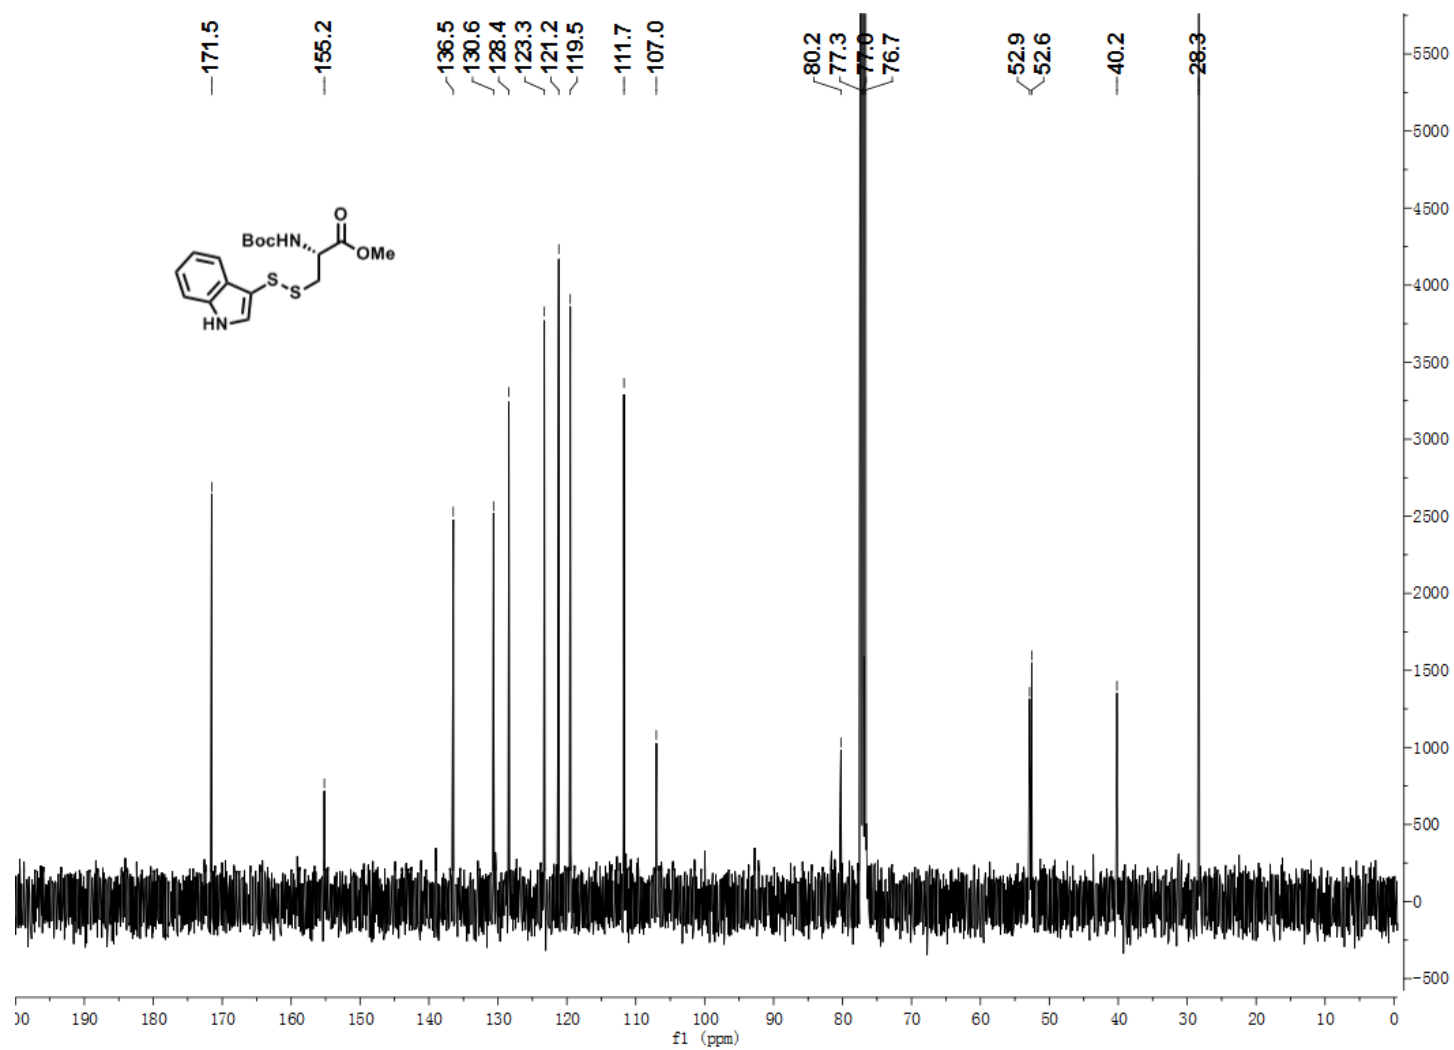

Supplementary Figure 119. <sup>13</sup>C NMR spectra for Compound 5u.

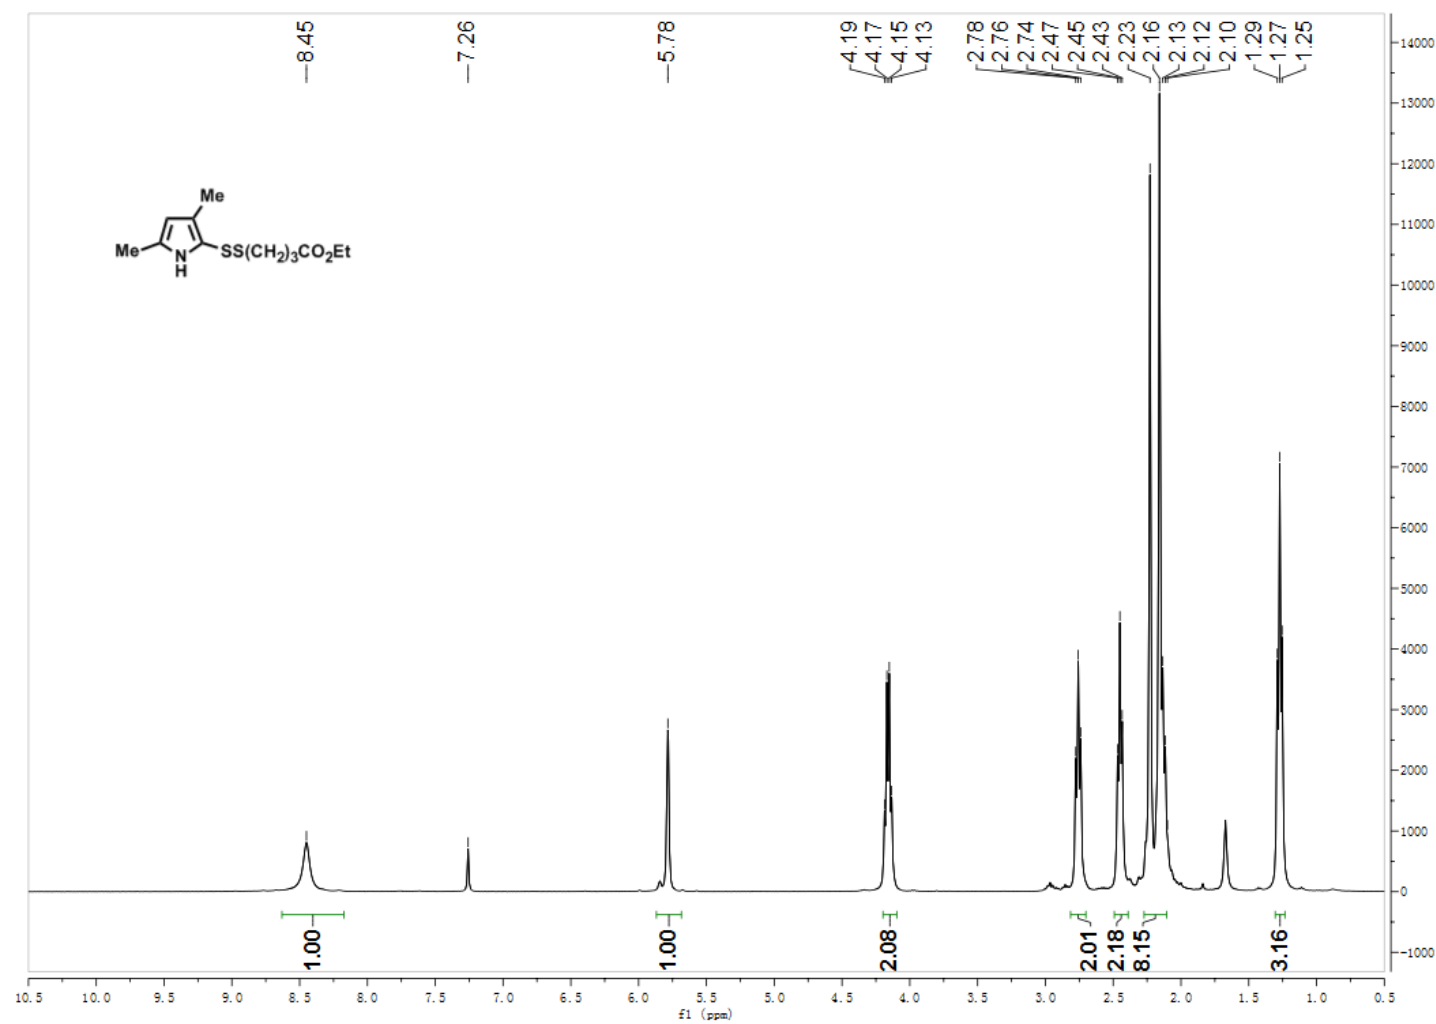

Supplementary Figure 120. <sup>1</sup>H NMR spectra for Compound 5v.

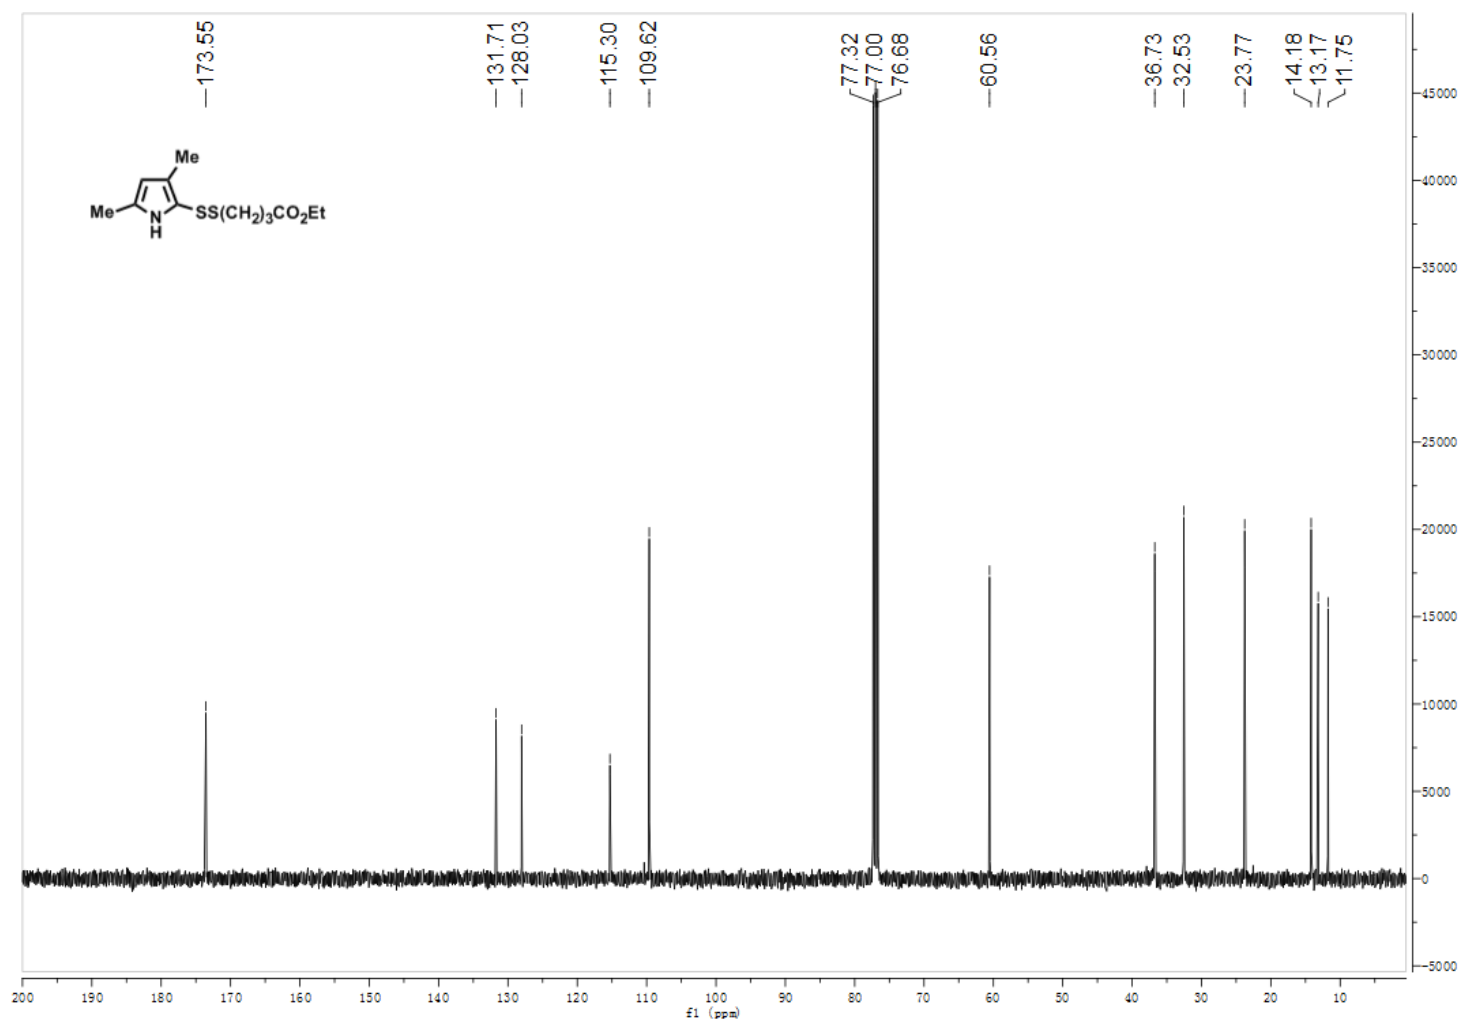

Supplementary Figure 121.  $^{13}\text{C}$  NMR spectra for Compound 5v.

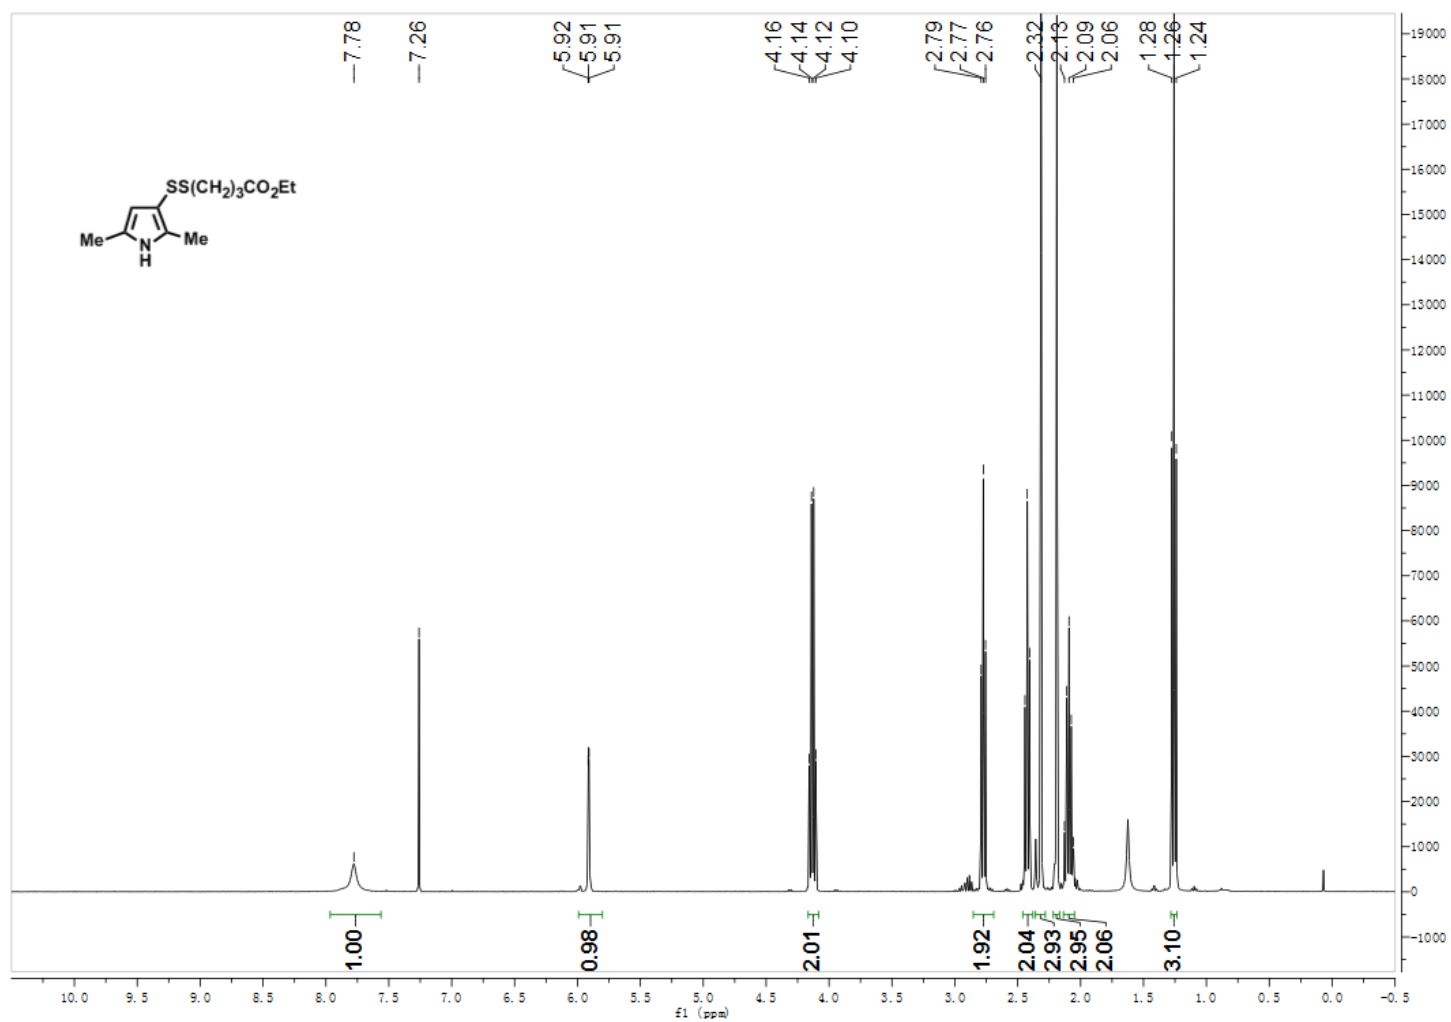

Supplementary Figure 122. <sup>1</sup>H NMR spectra for Compound 5w.

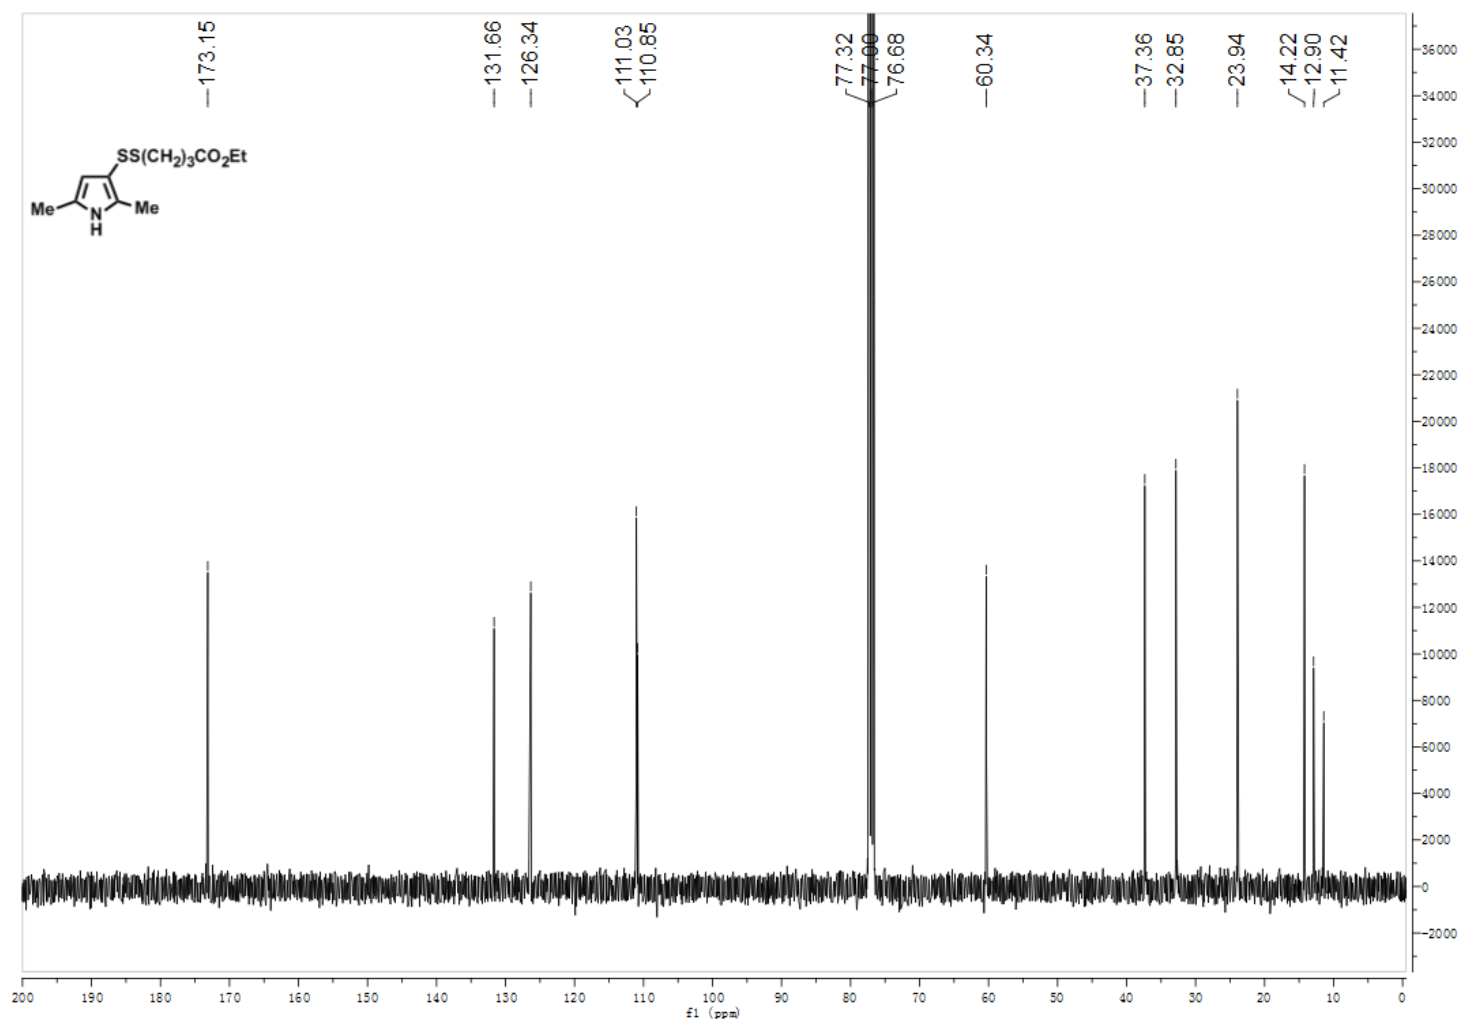

Supplementary Figure 123. <sup>13</sup>C NMR spectra for Compound 5w.

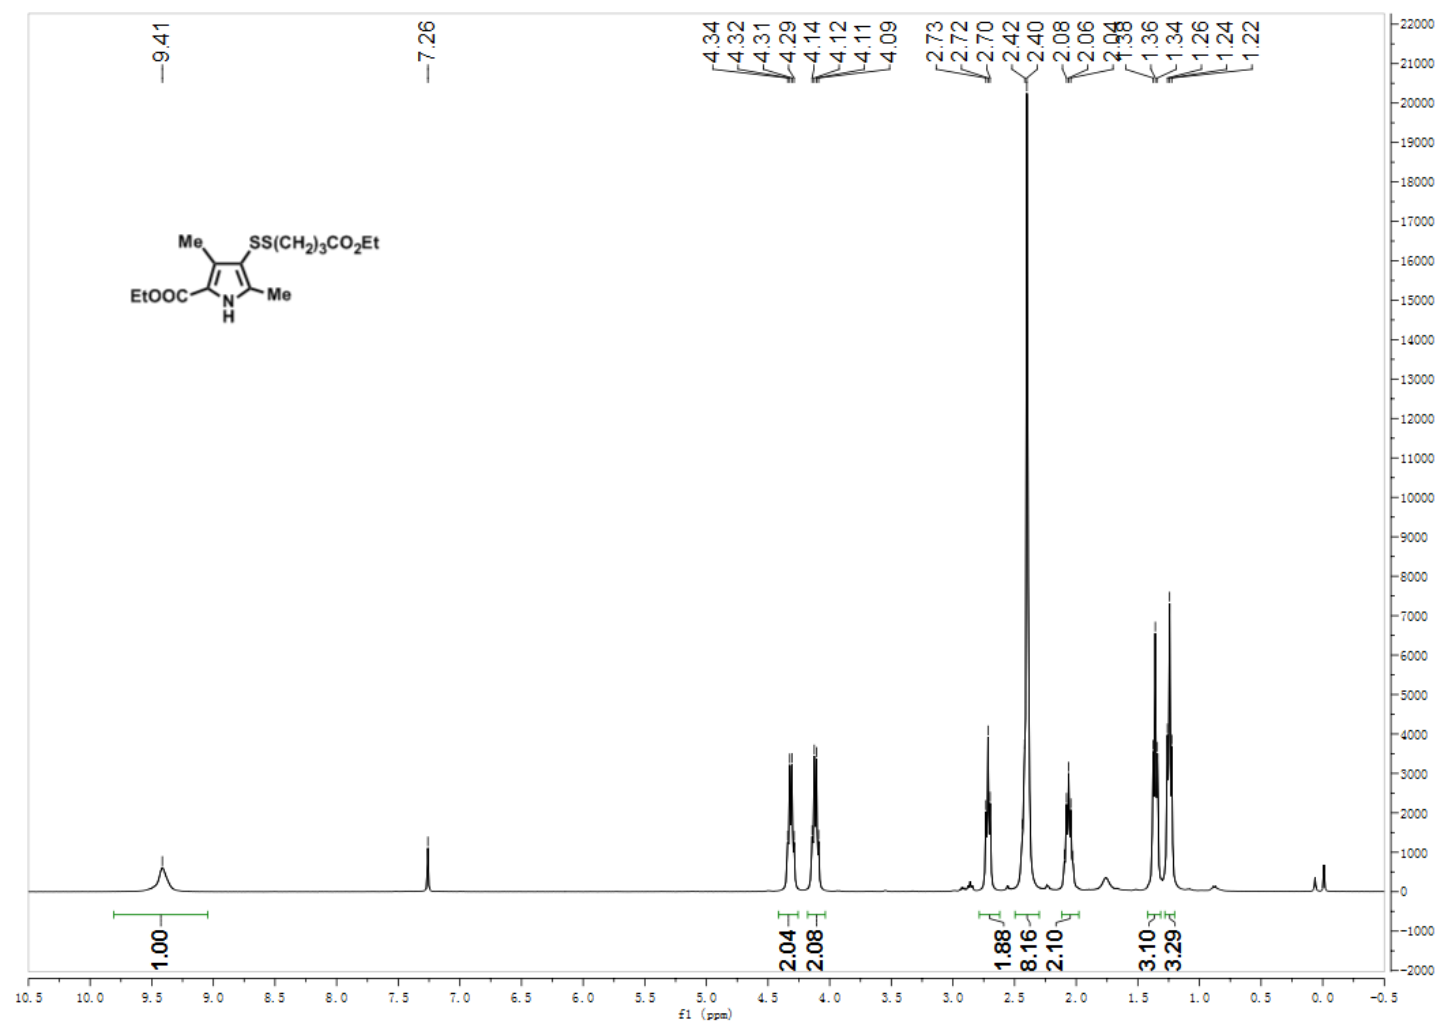

Supplementary Figure 124. <sup>1</sup>H NMR spectra for Compound 5x.

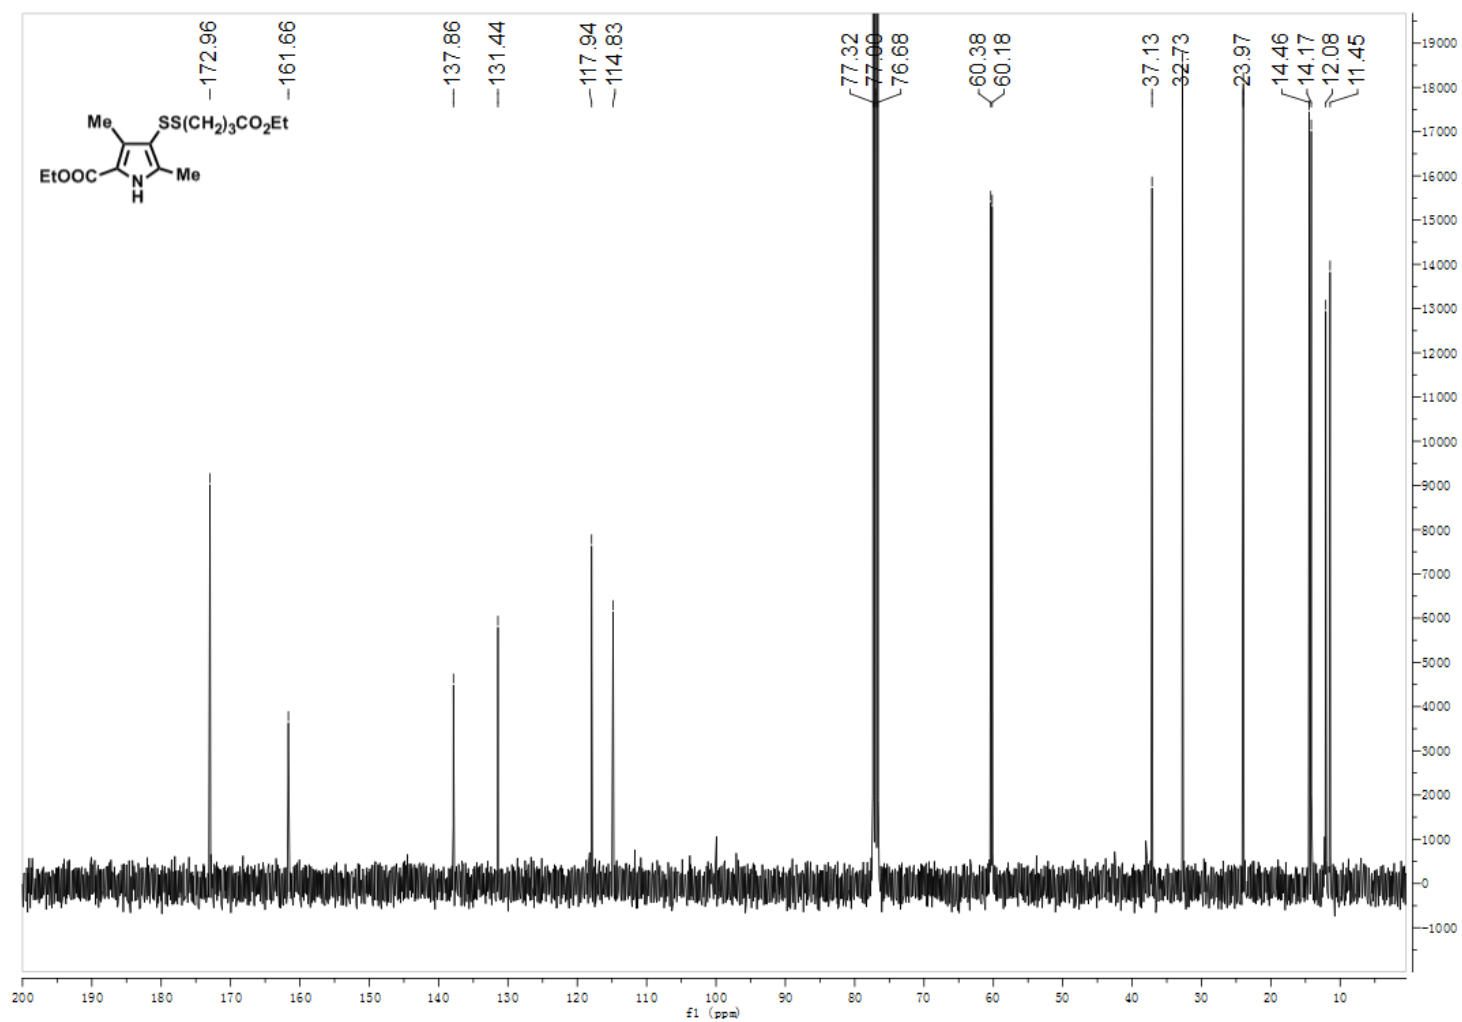

Supplementary Figure 125. <sup>13</sup>C NMR spectra for Compound 5x.

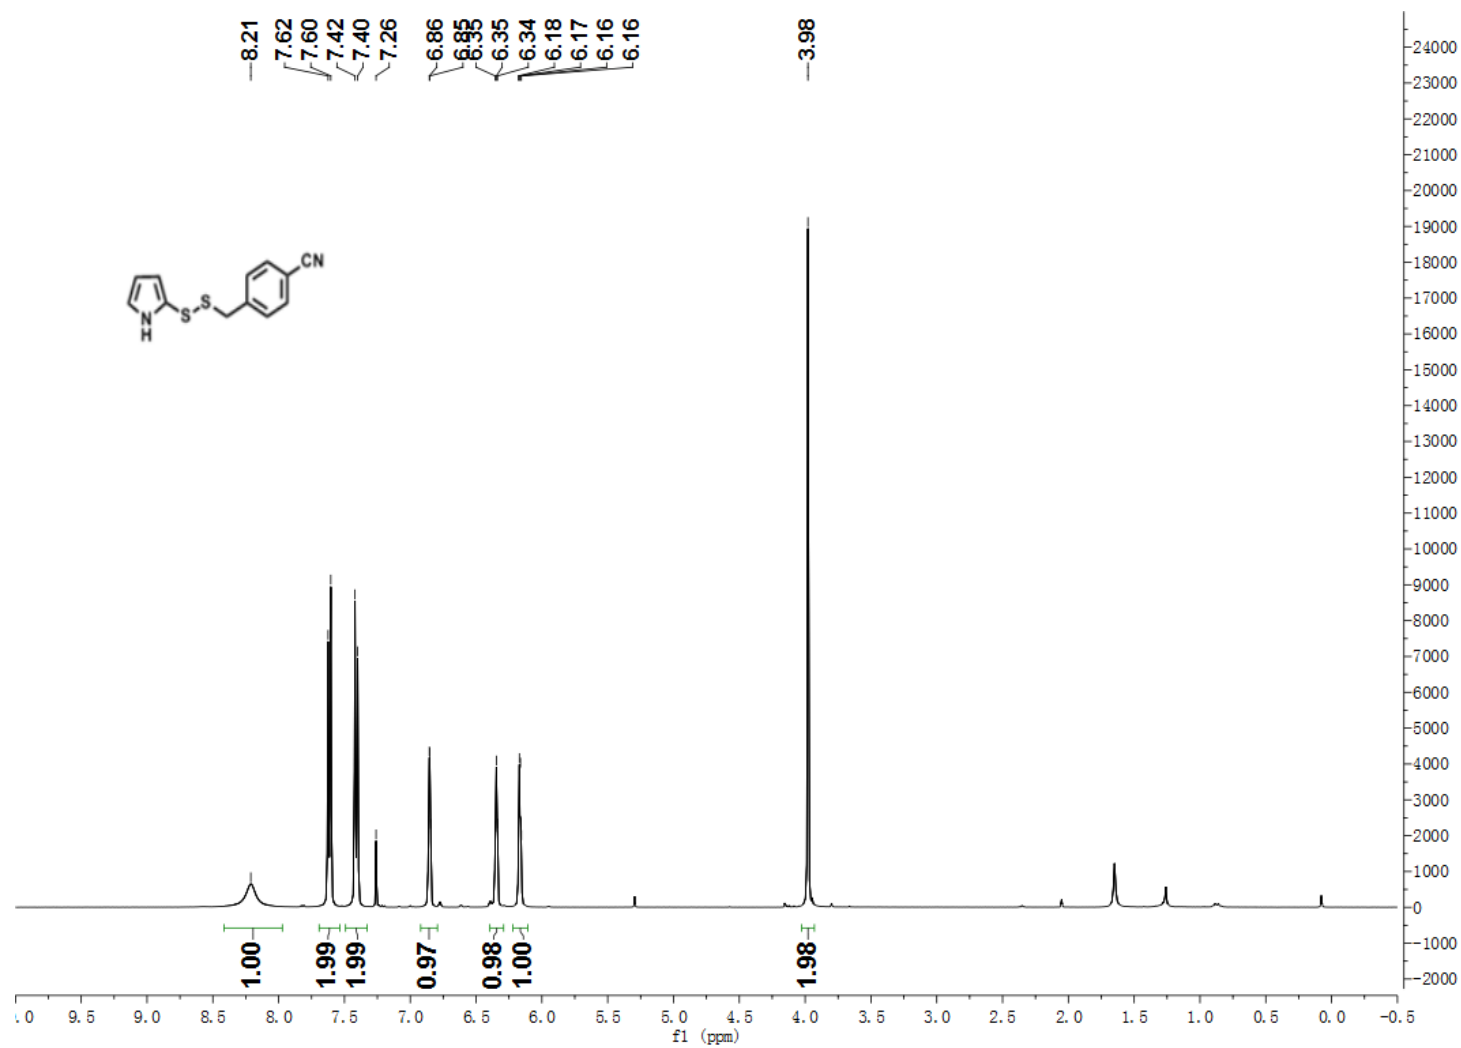

Supplementary Figure 126. <sup>1</sup>H NMR spectra for Compound 5y.

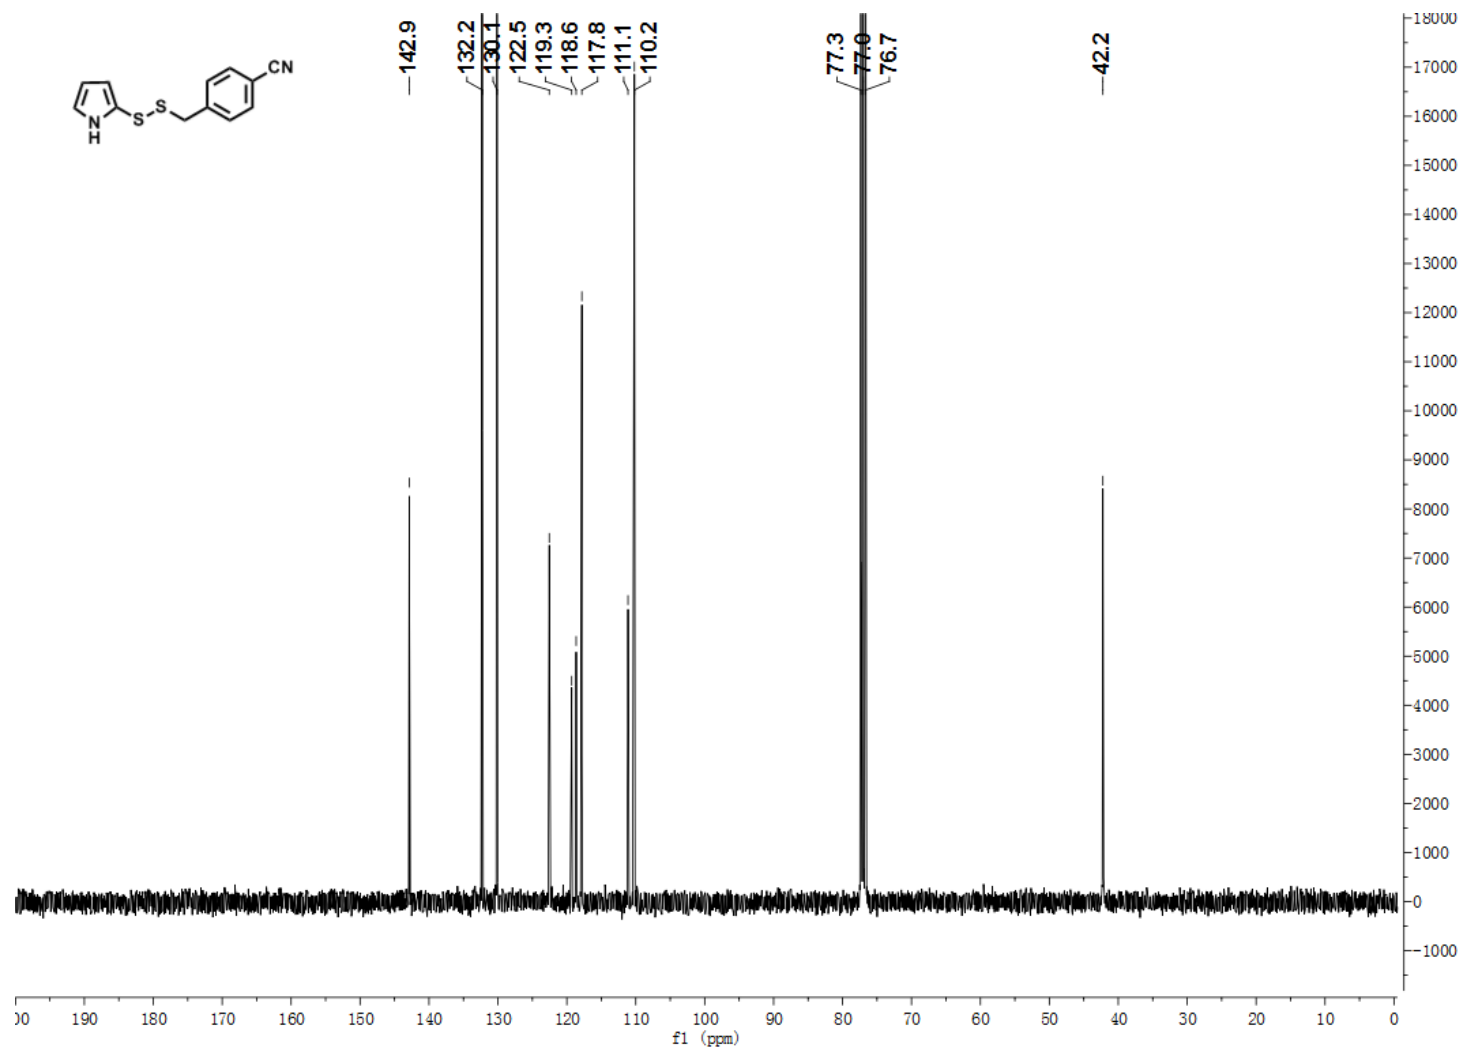

Supplementary Figure 127. <sup>13</sup>C NMR spectra for Compound 5y.

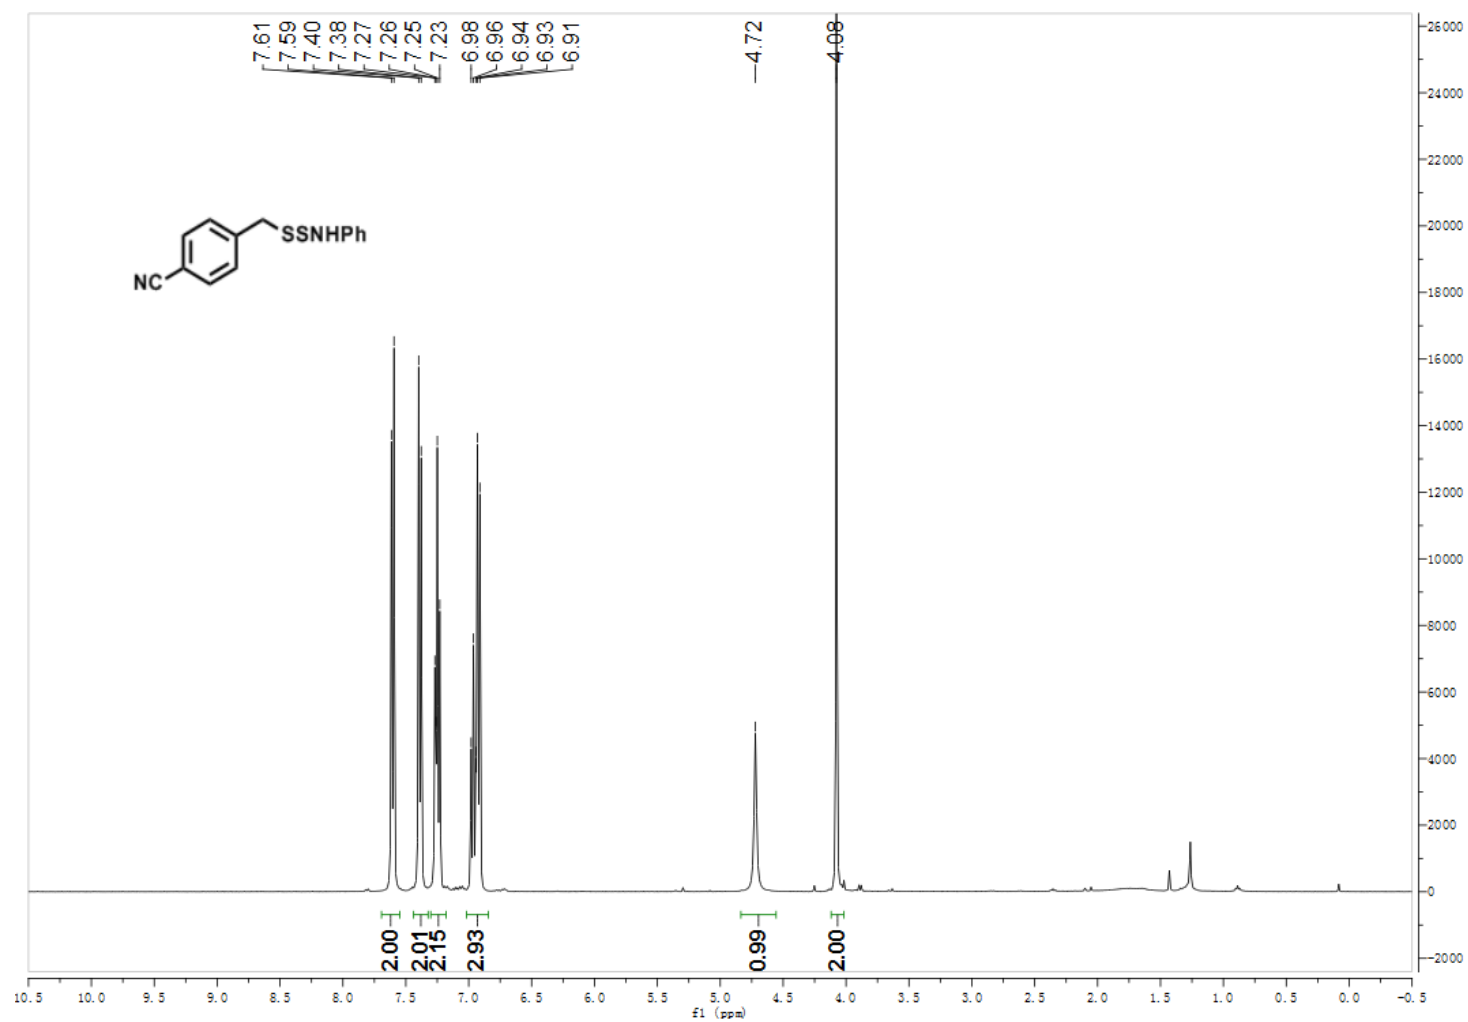

Supplementary Figure 128. <sup>1</sup>H NMR spectra for Compound 6a.

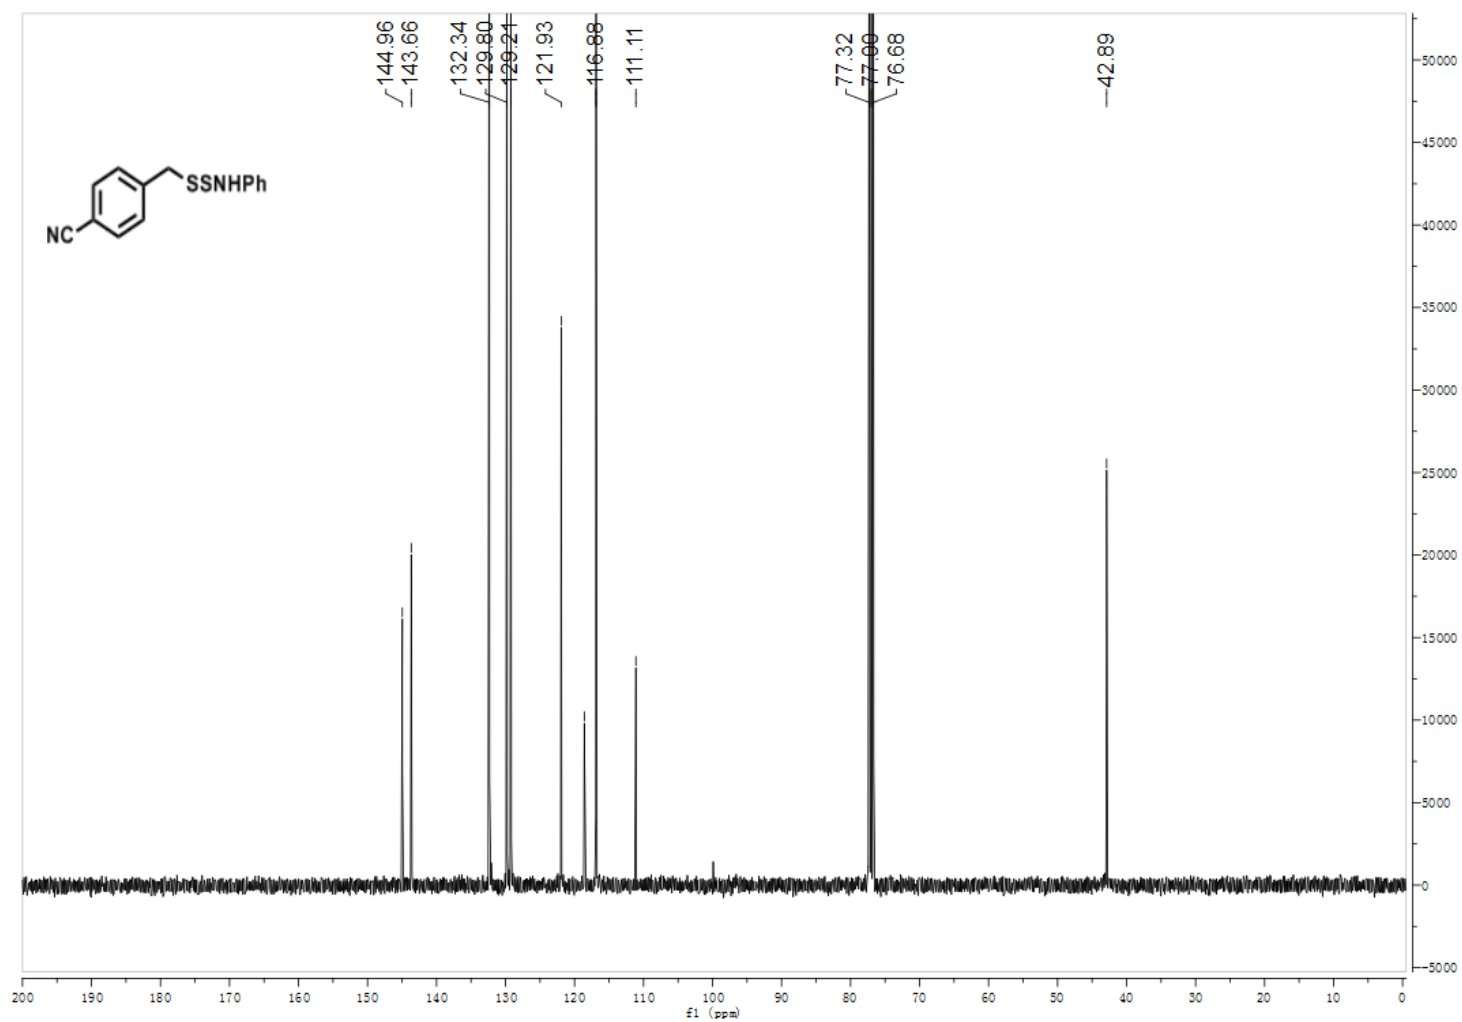

Supplementary Figure 129. <sup>13</sup>C NMR spectra for Compound 6a.

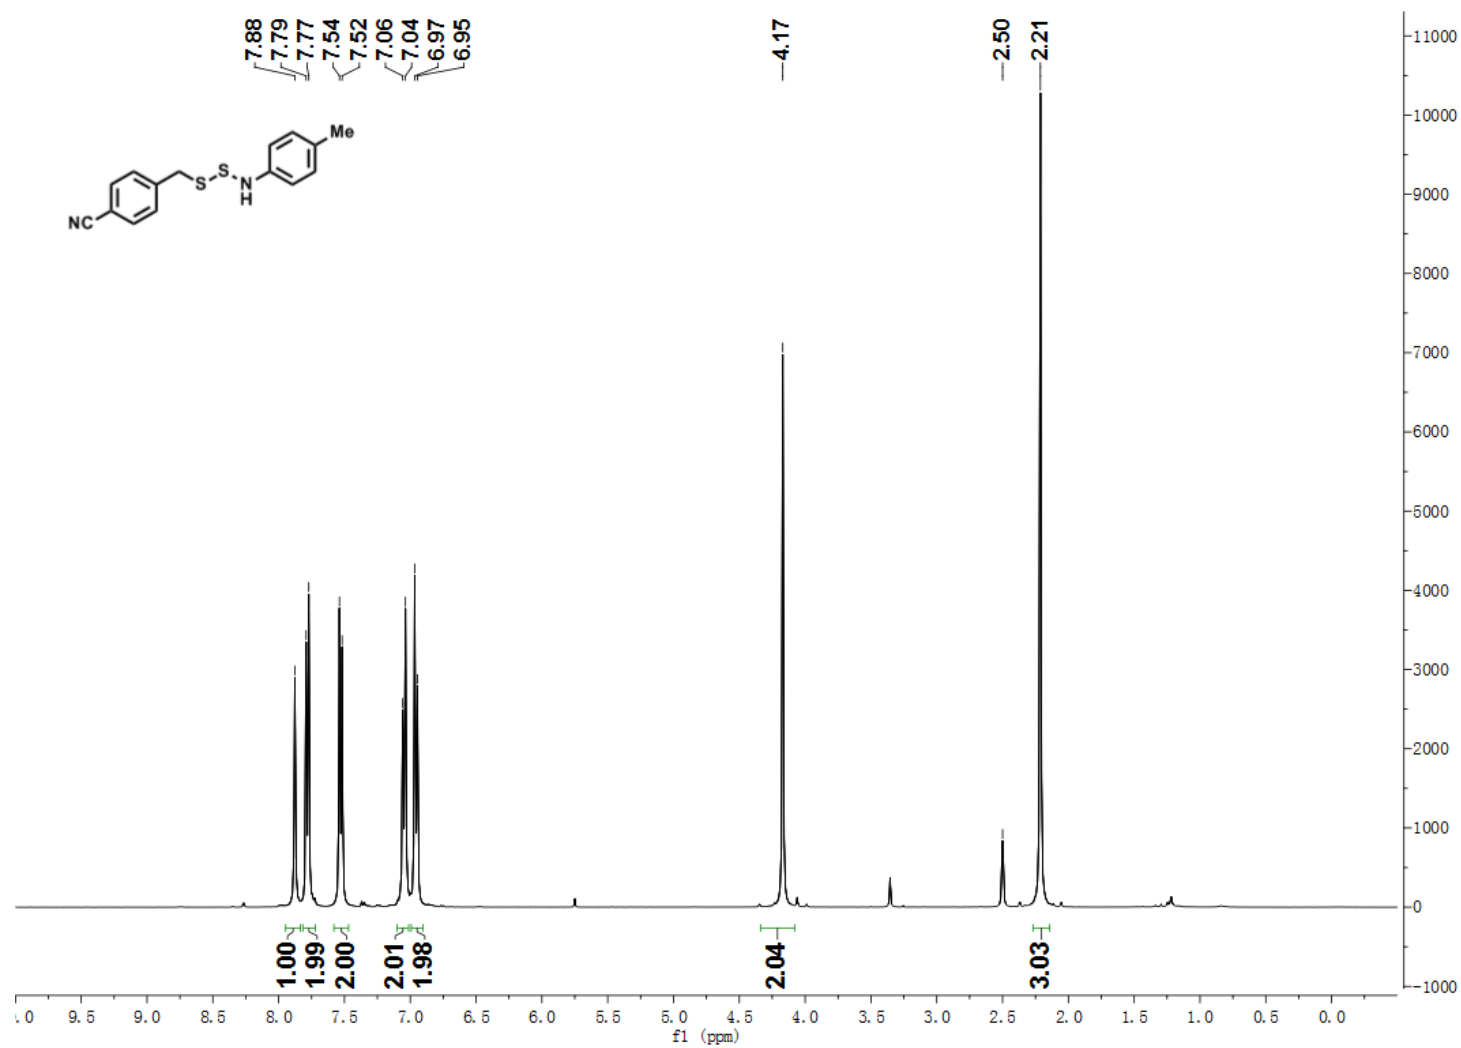

Supplementary Figure 130. <sup>1</sup>H NMR spectra for Compound 6b.

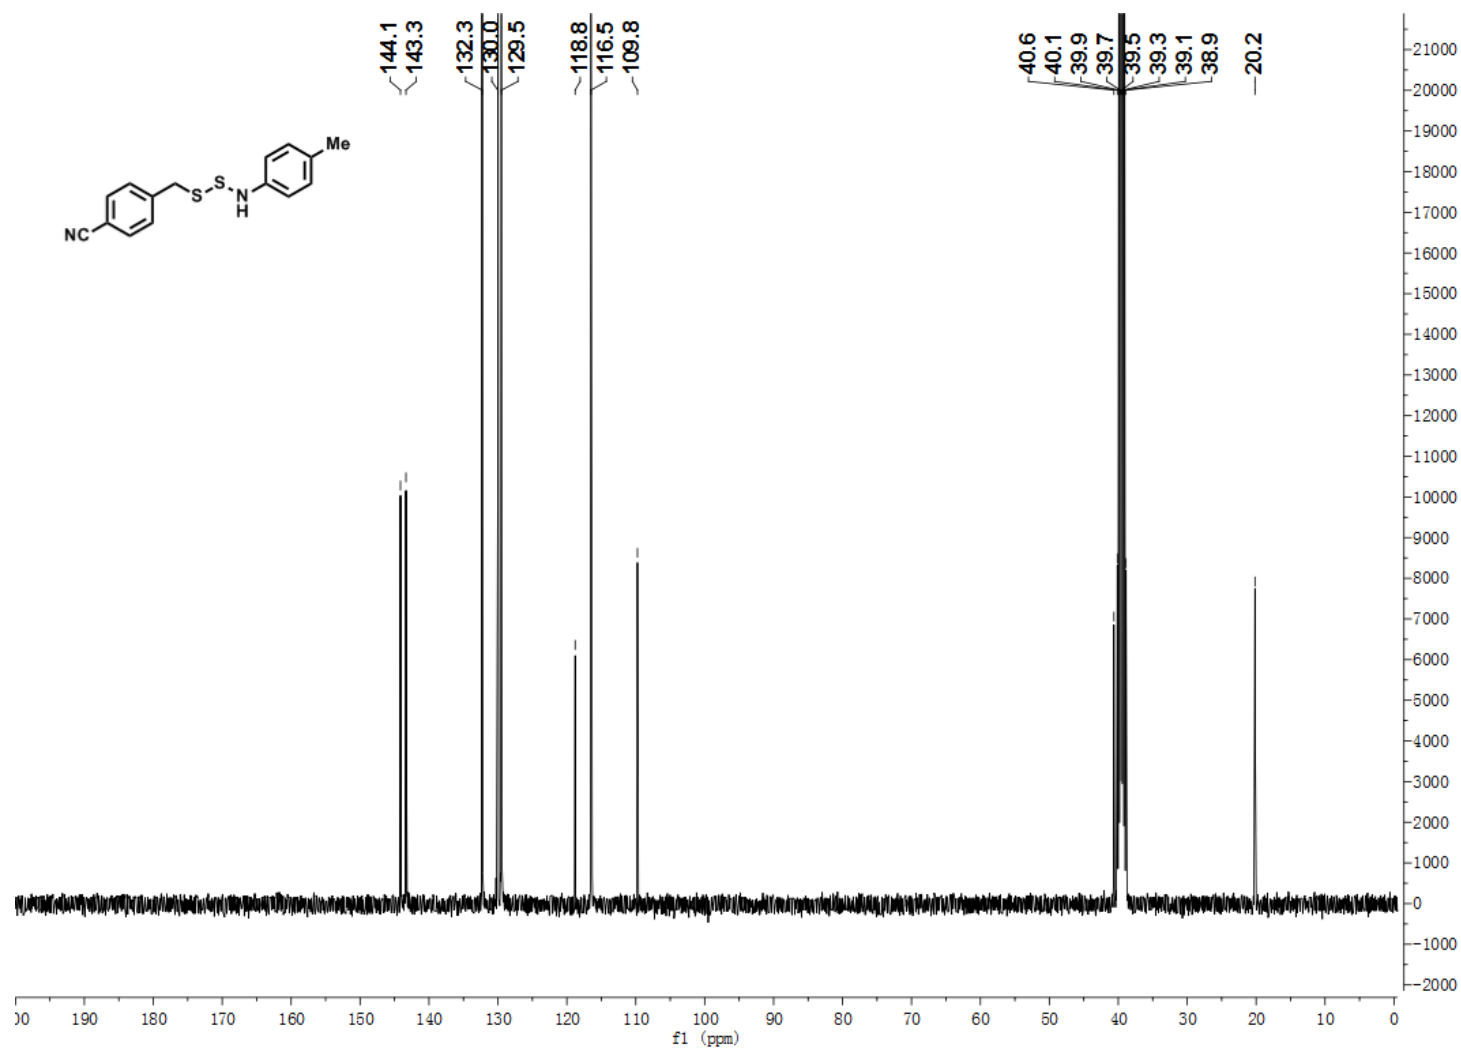

Supplementary Figure 131. <sup>13</sup>C NMR spectra for Compound 6b.

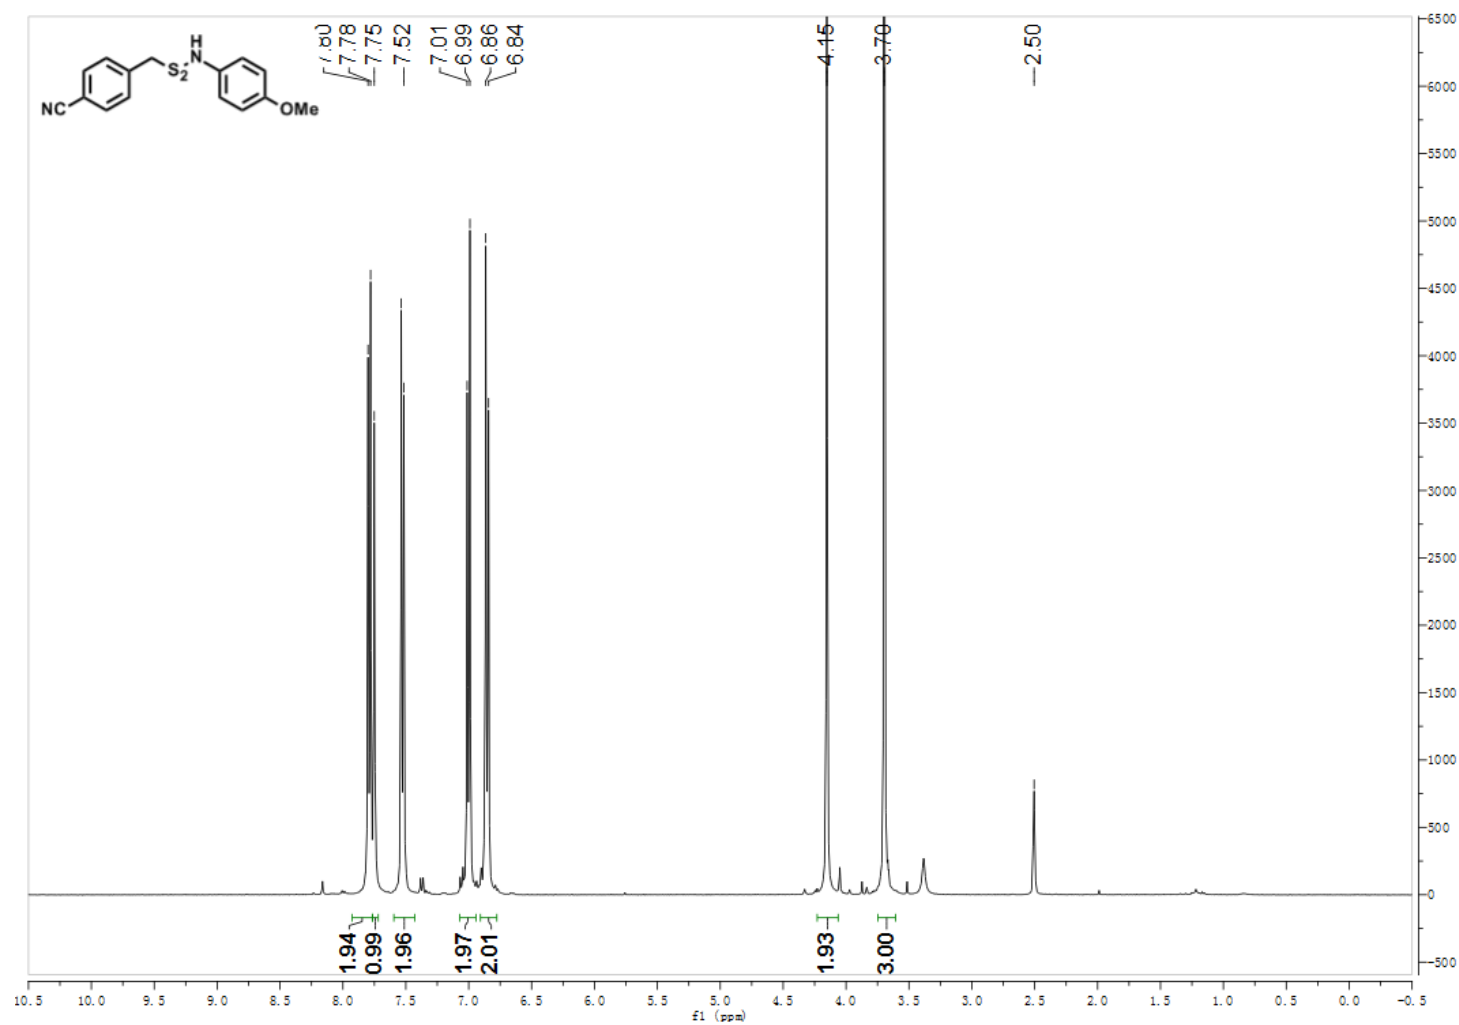

Supplementary Figure 132. <sup>1</sup>H NMR spectra for Compound 6c.

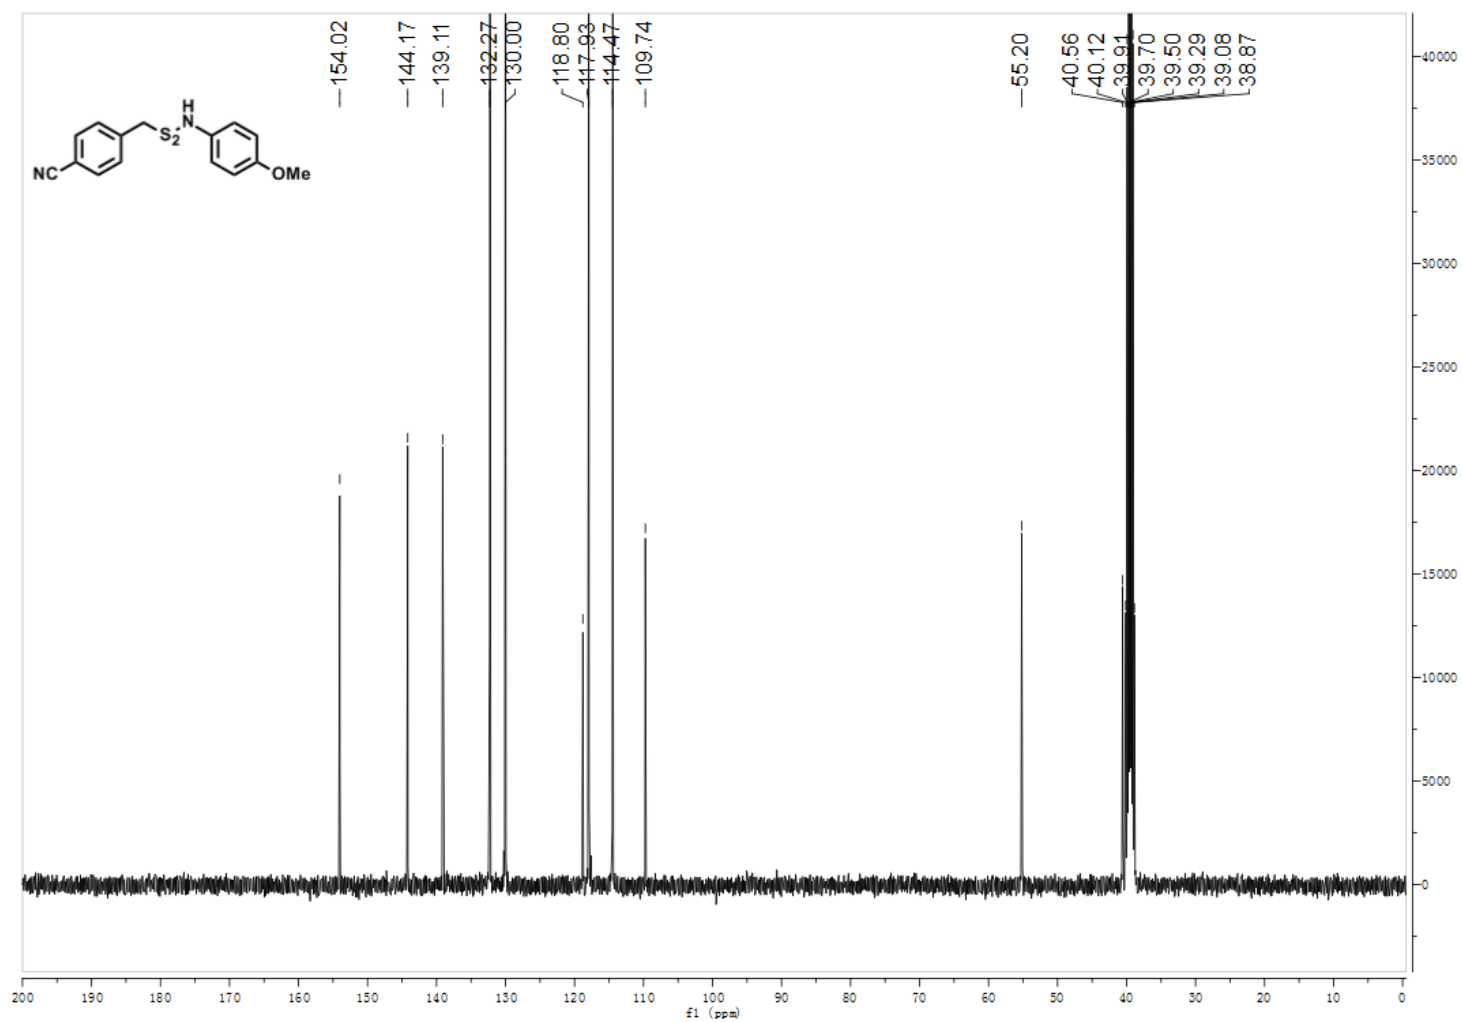

Supplementary Figure 133. <sup>13</sup>C NMR spectra for Compound 6c.

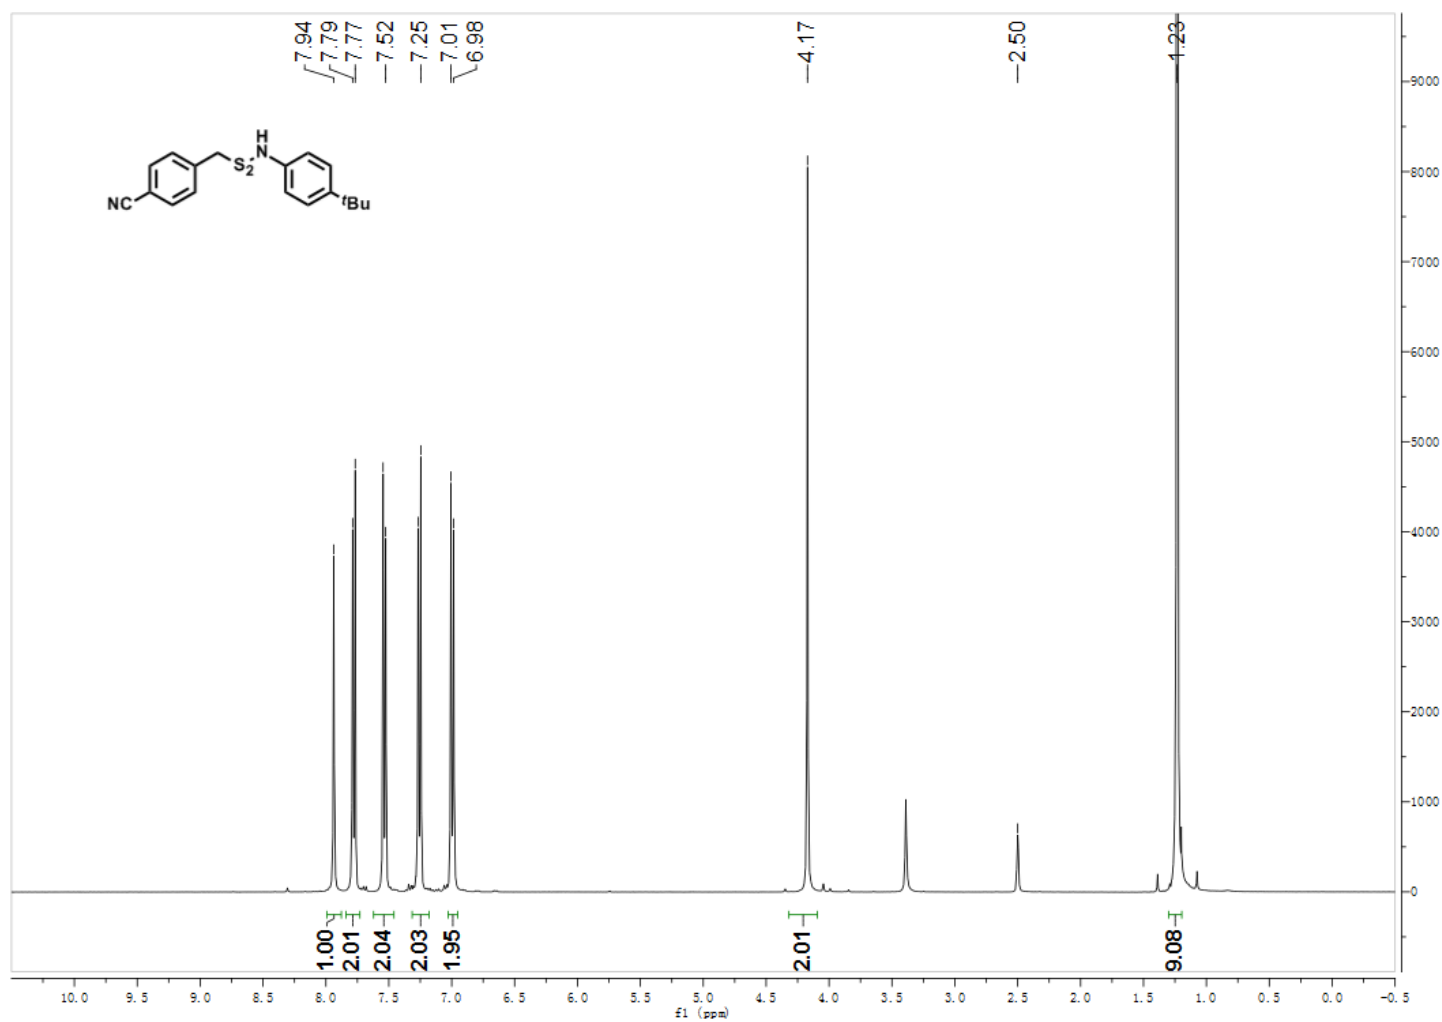

Supplementary Figure 134. <sup>1</sup>H NMR spectra for Compound 6d.

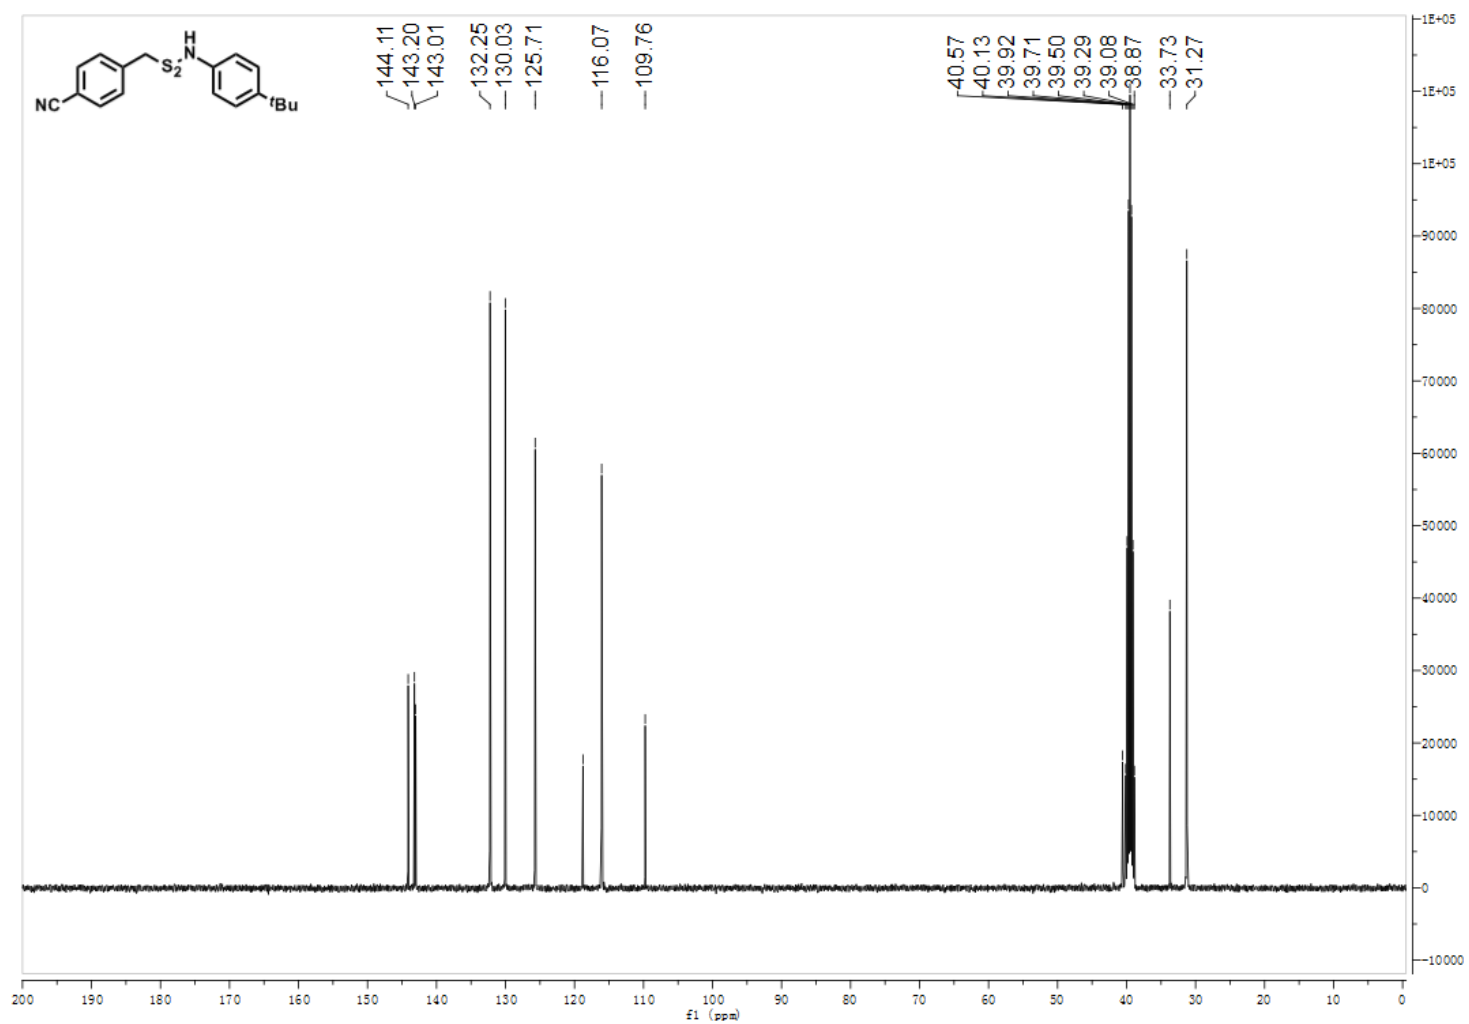

Supplementary Figure 135. <sup>13</sup>C NMR spectra for Compound 6d.

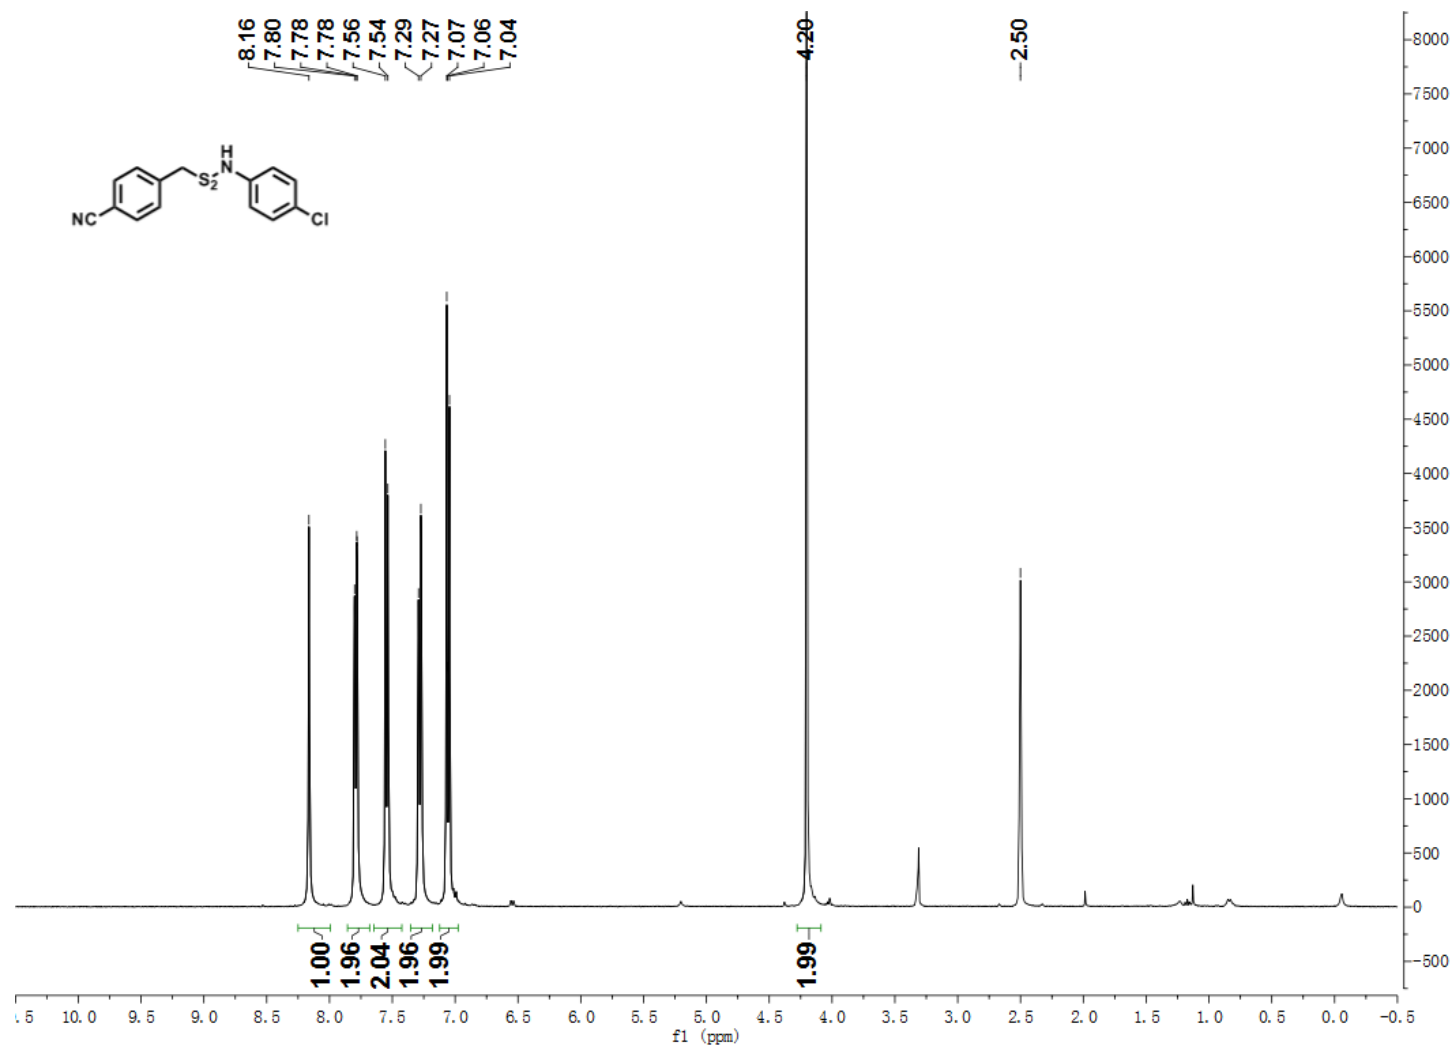

Supplementary Figure 136. <sup>1</sup>H NMR spectra for Compound 6e.

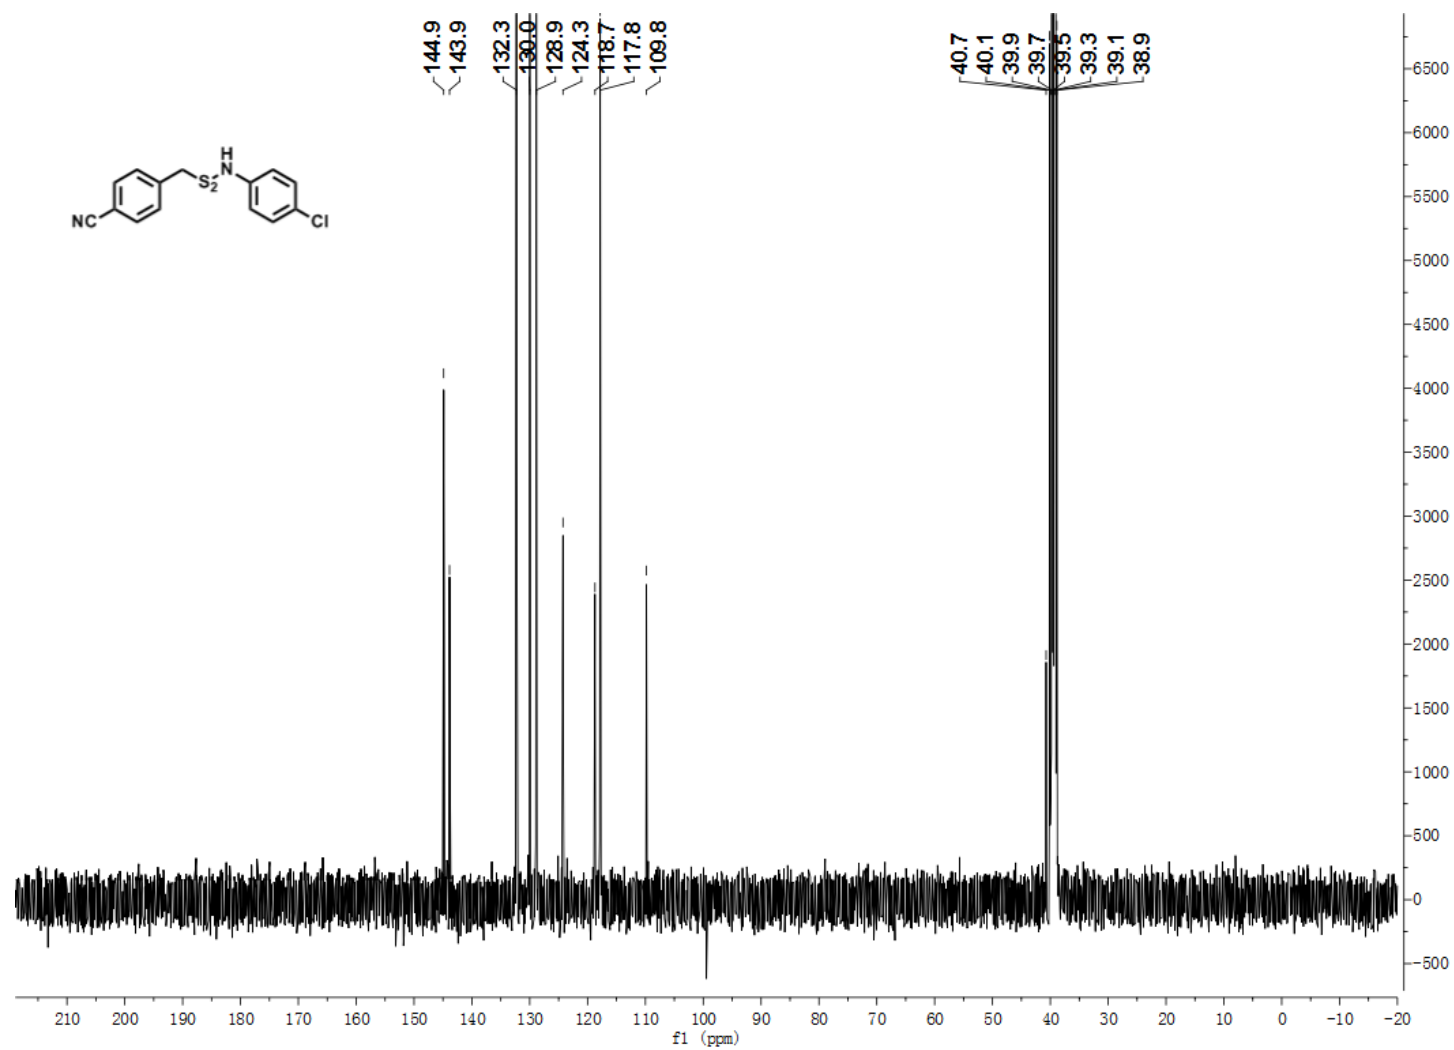

Supplementary Figure 137. <sup>13</sup>C NMR spectra for Compound 6e.

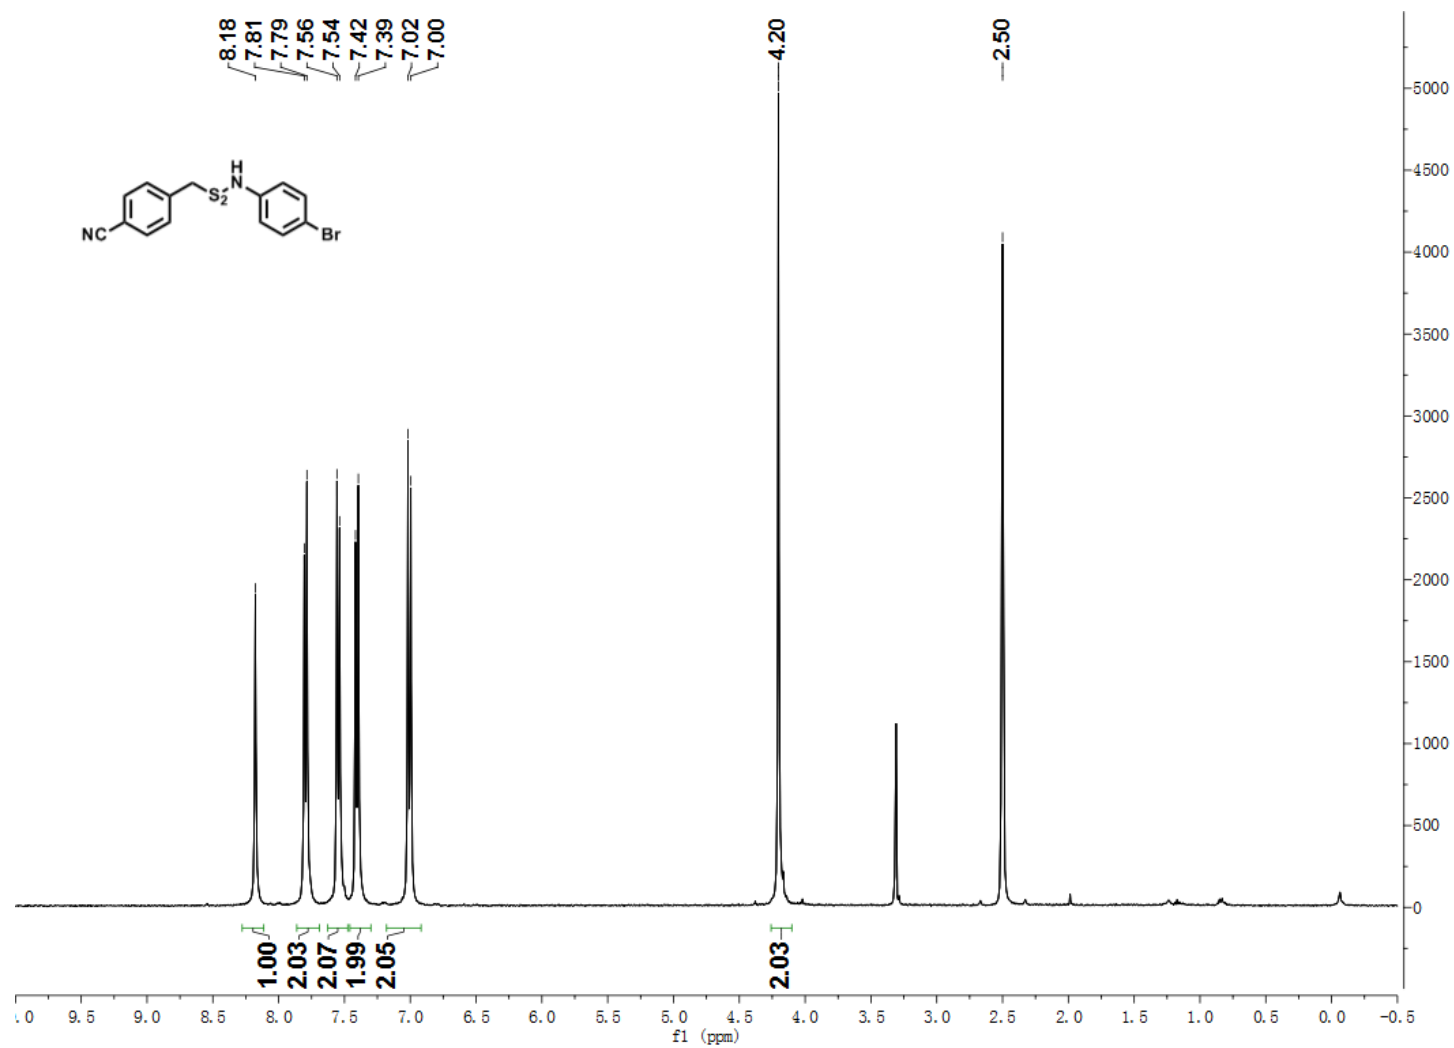

Supplementary Figure 138. <sup>1</sup>H NMR spectra for Compound 6f.

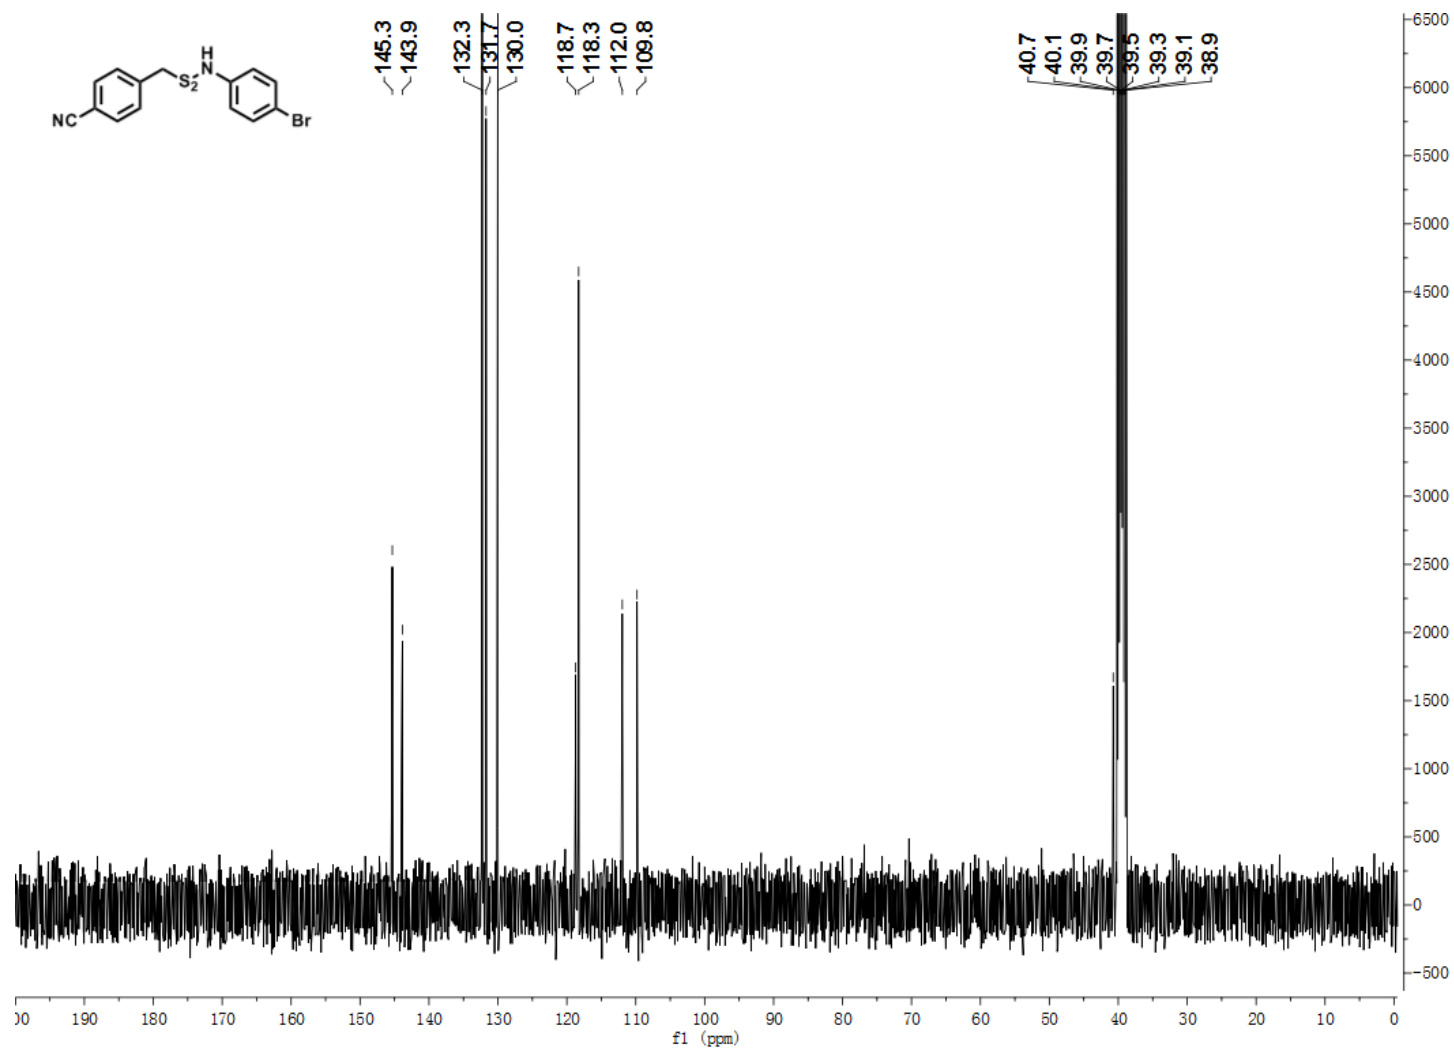

**Supplementary Figure 139.** <sup>13</sup>C NMR spectra for Compound **6f**.

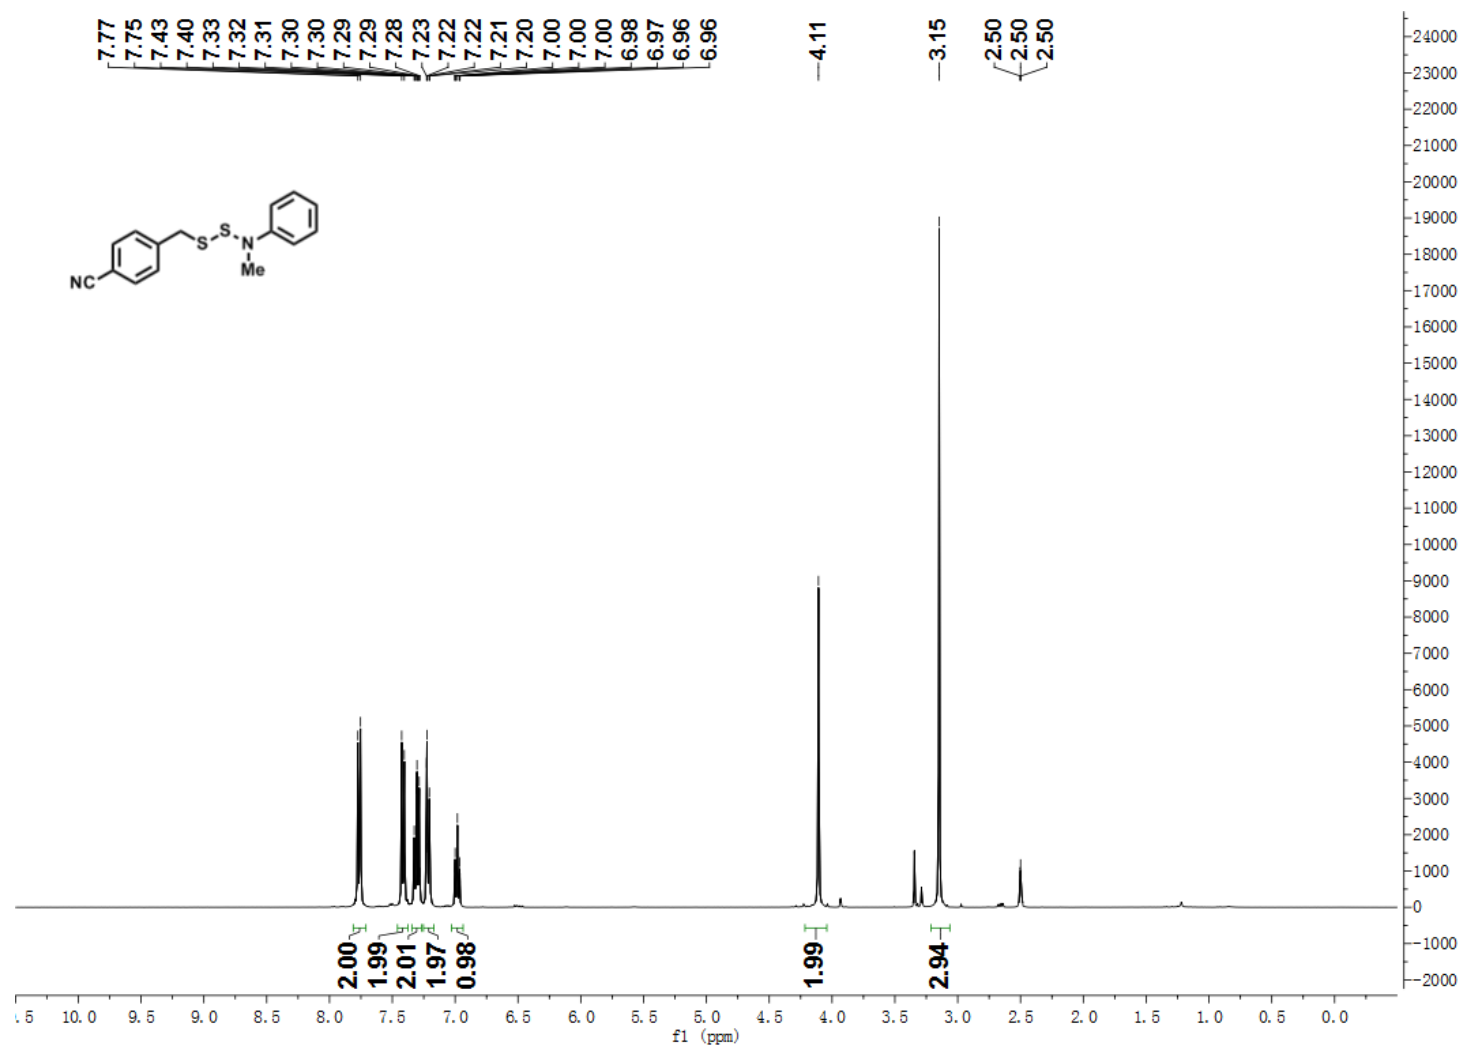

Supplementary Figure 140. <sup>1</sup>H NMR spectra for Compound 6g.

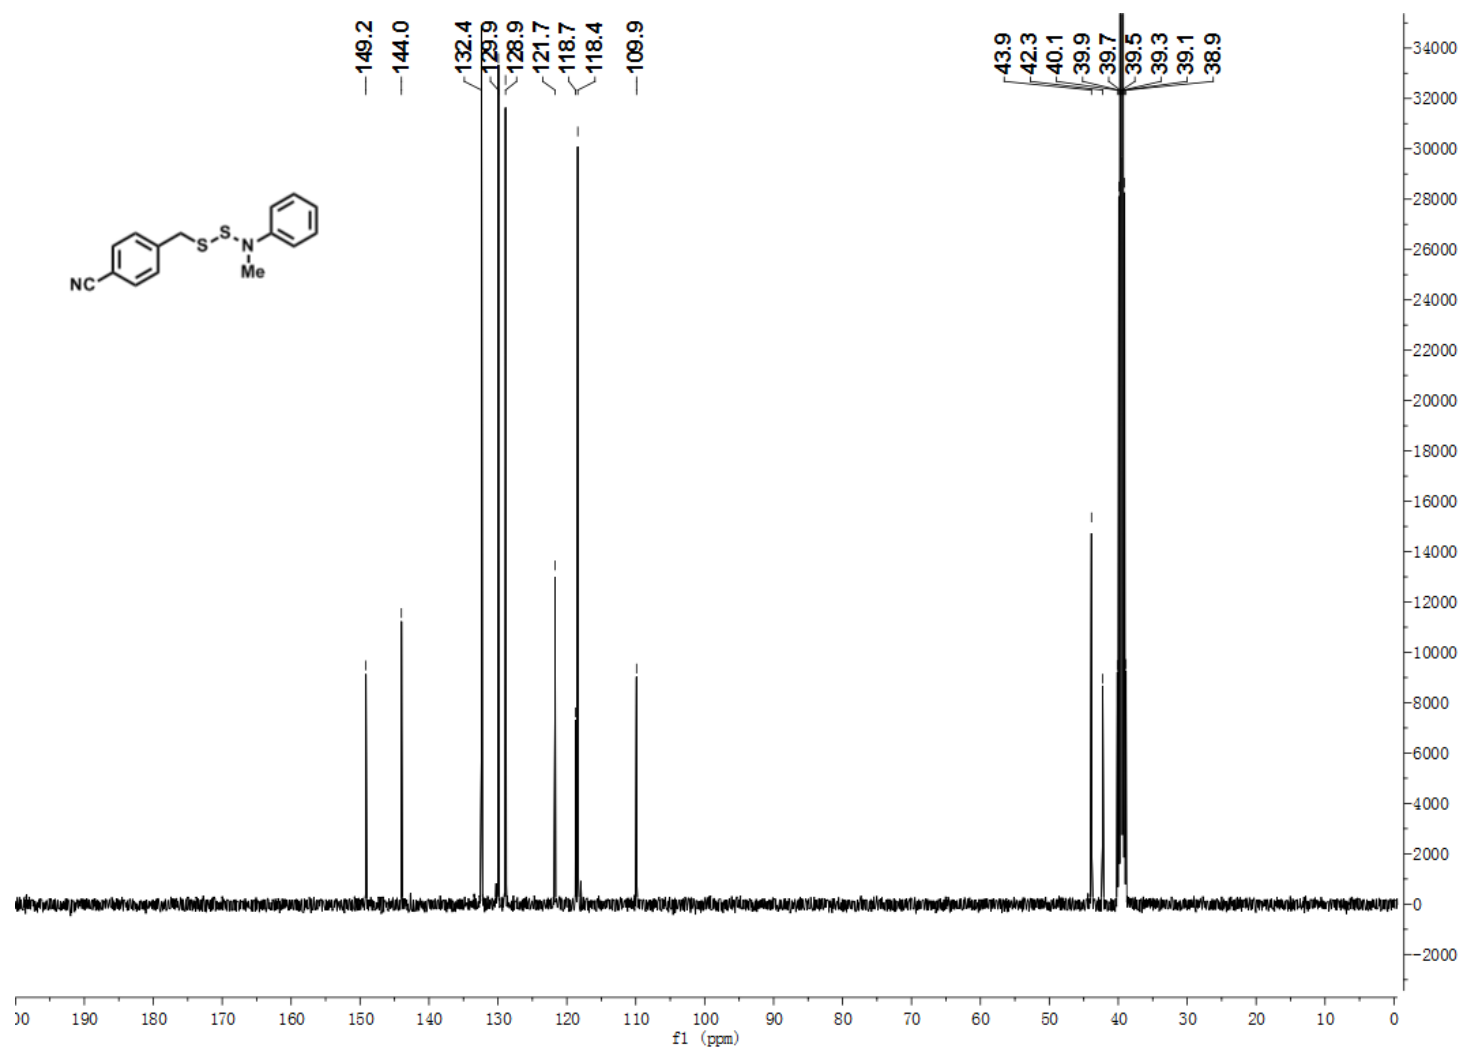

Supplementary Figure 141. <sup>13</sup>C NMR spectra for Compound 6g.

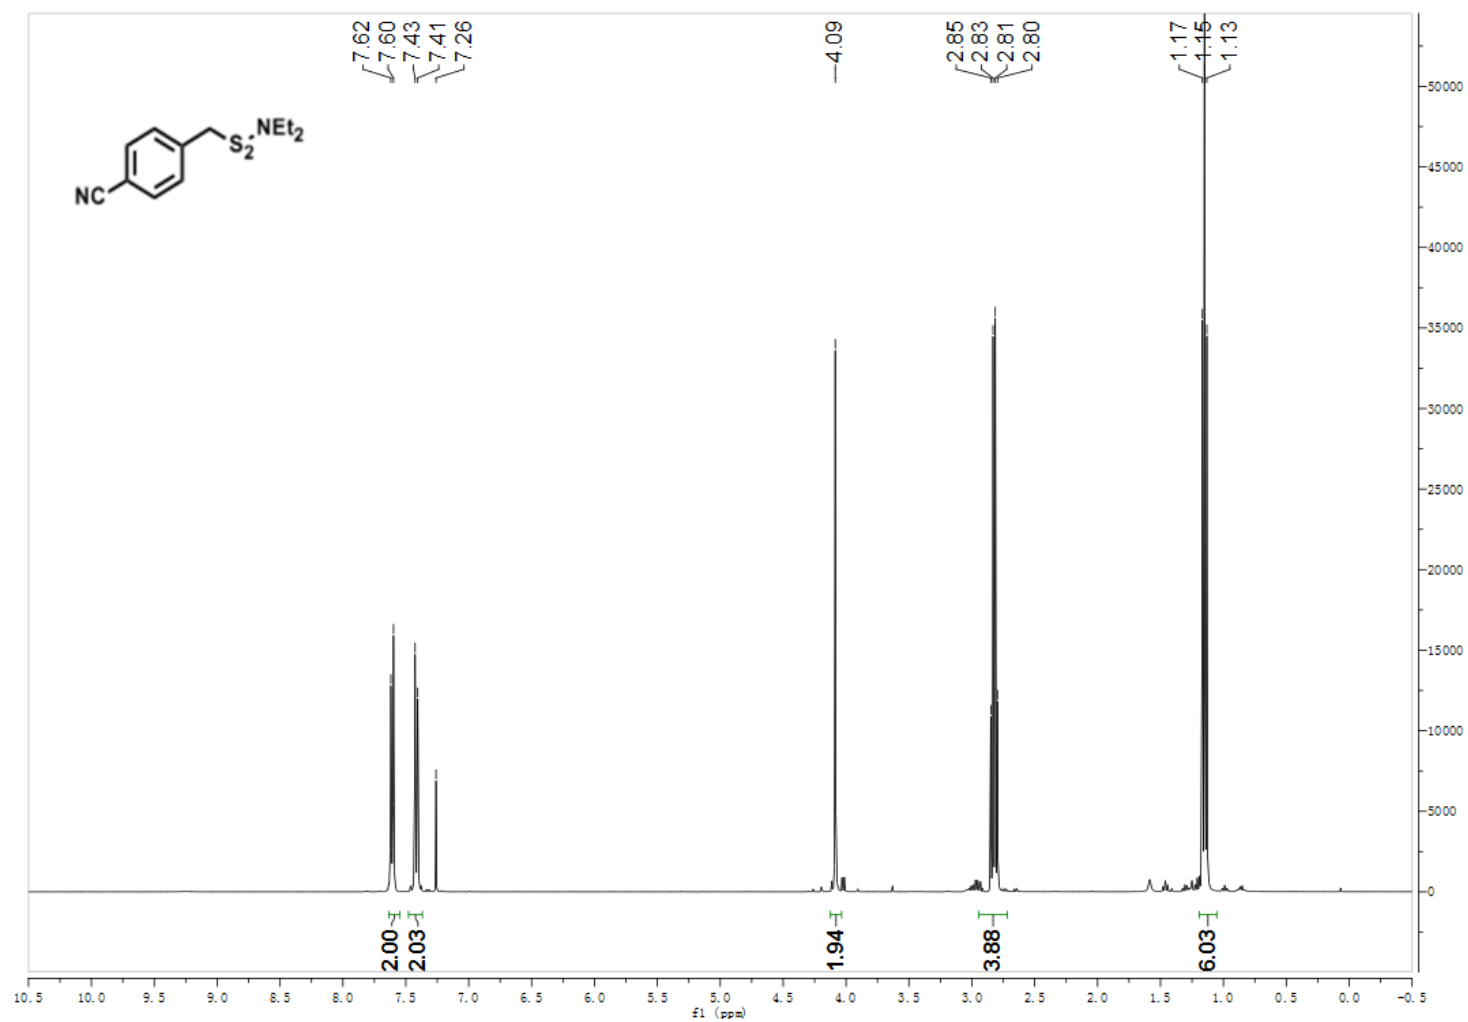

Supplementary Figure 142. <sup>1</sup>H NMR spectra for Compound 6h.

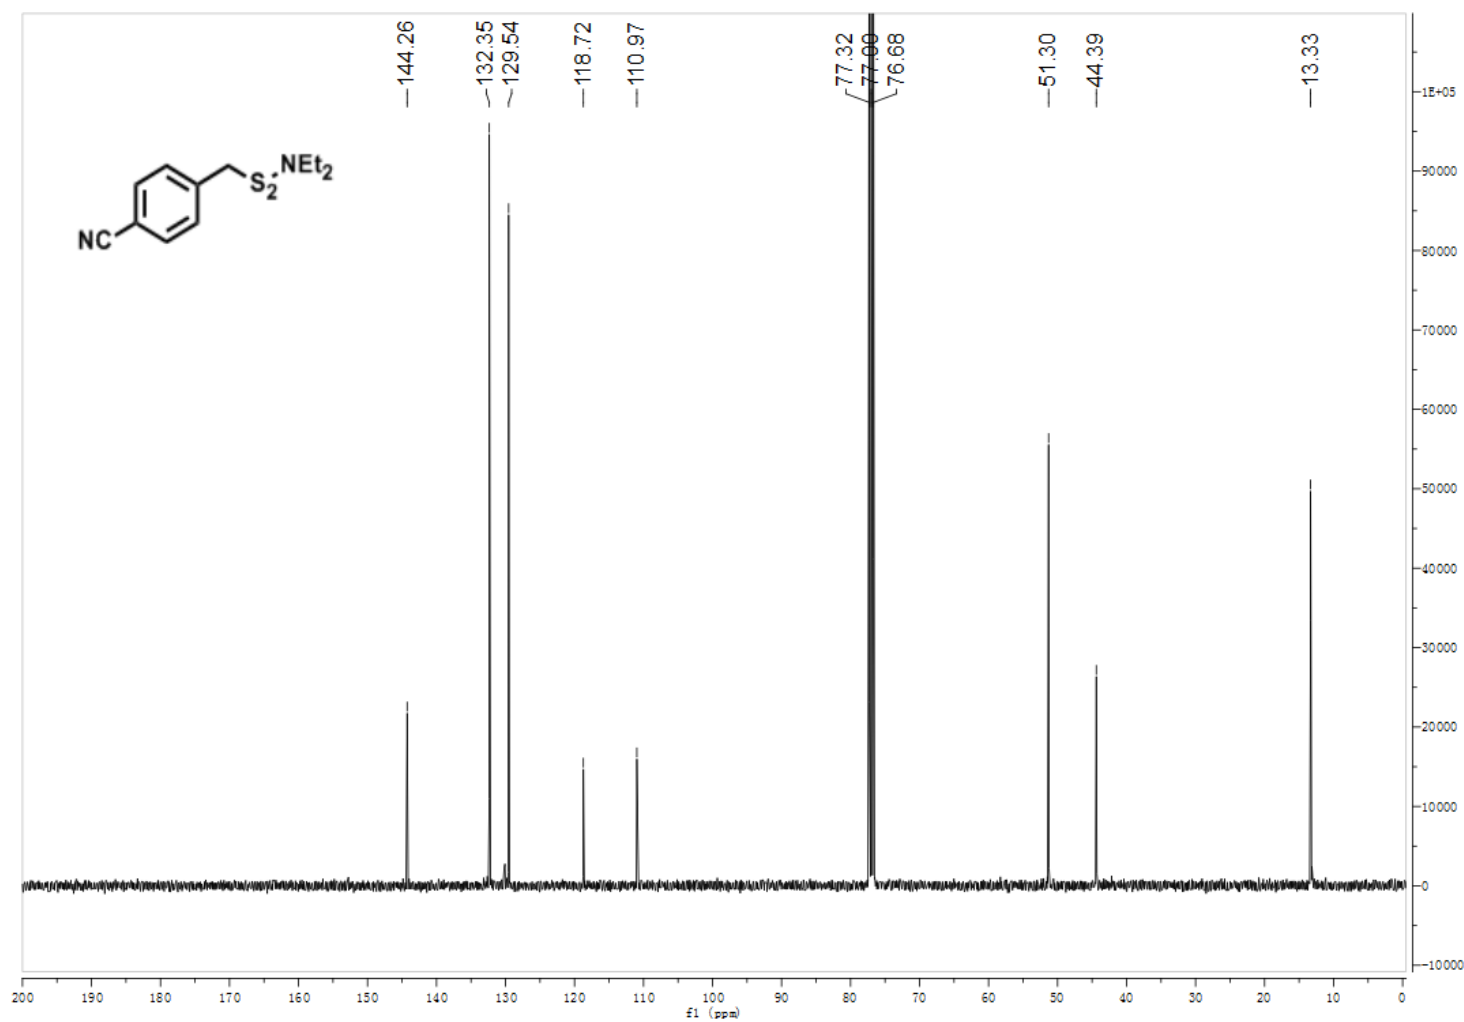

Supplementary Figure 143. <sup>13</sup>C NMR spectra for Compound 6h.

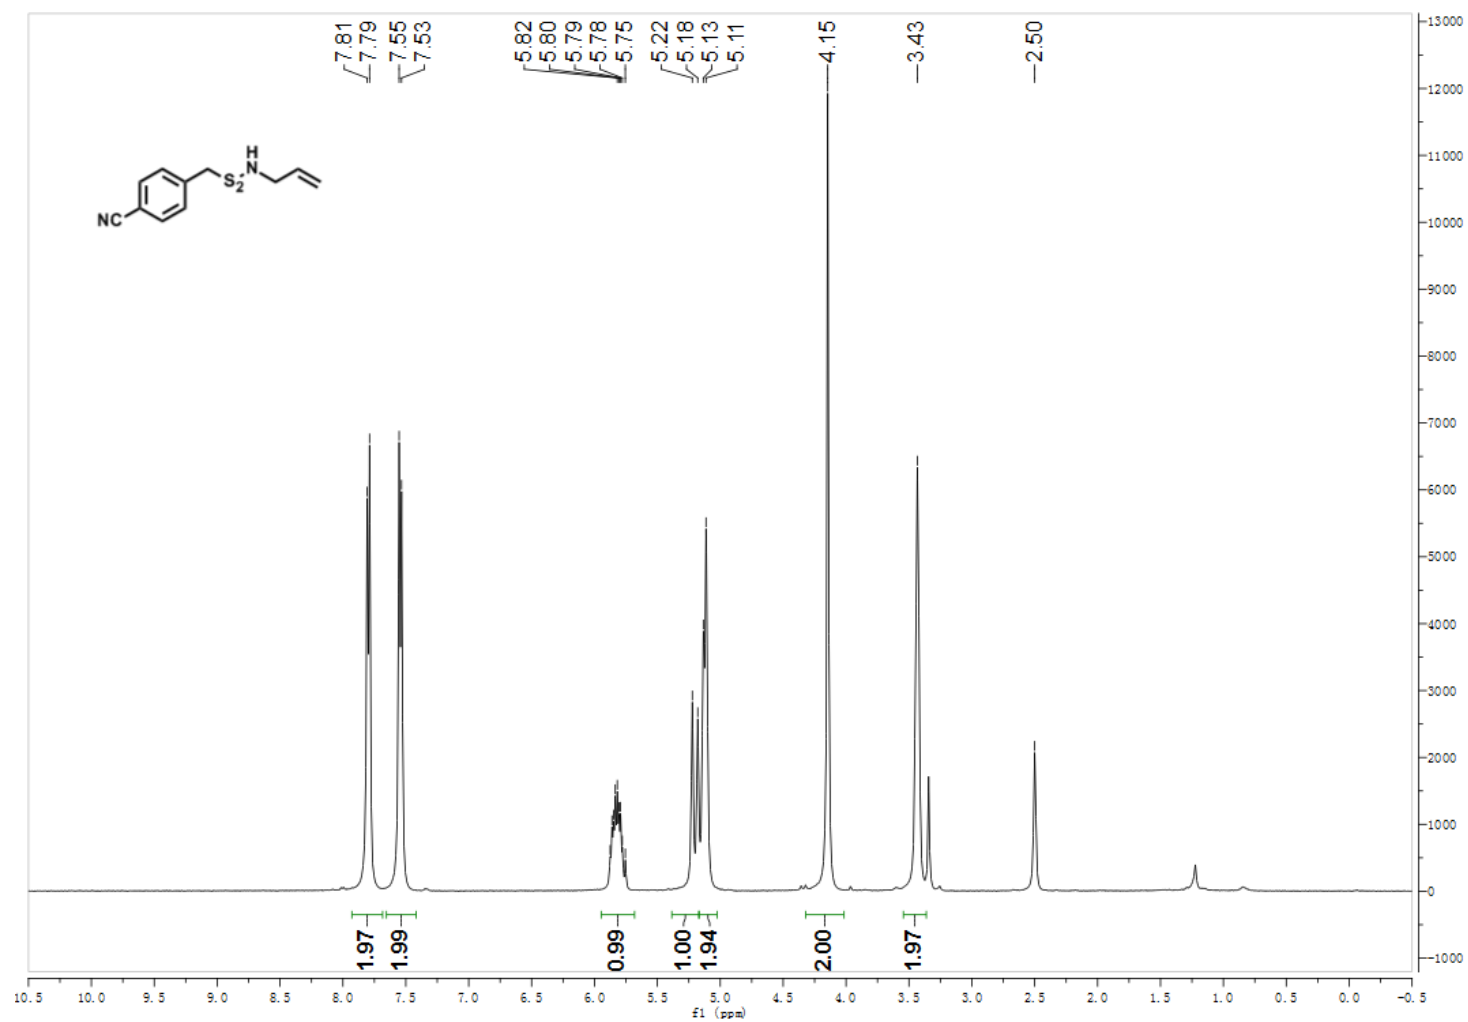

Supplementary Figure 144. <sup>1</sup>H NMR spectra for Compound 6i.

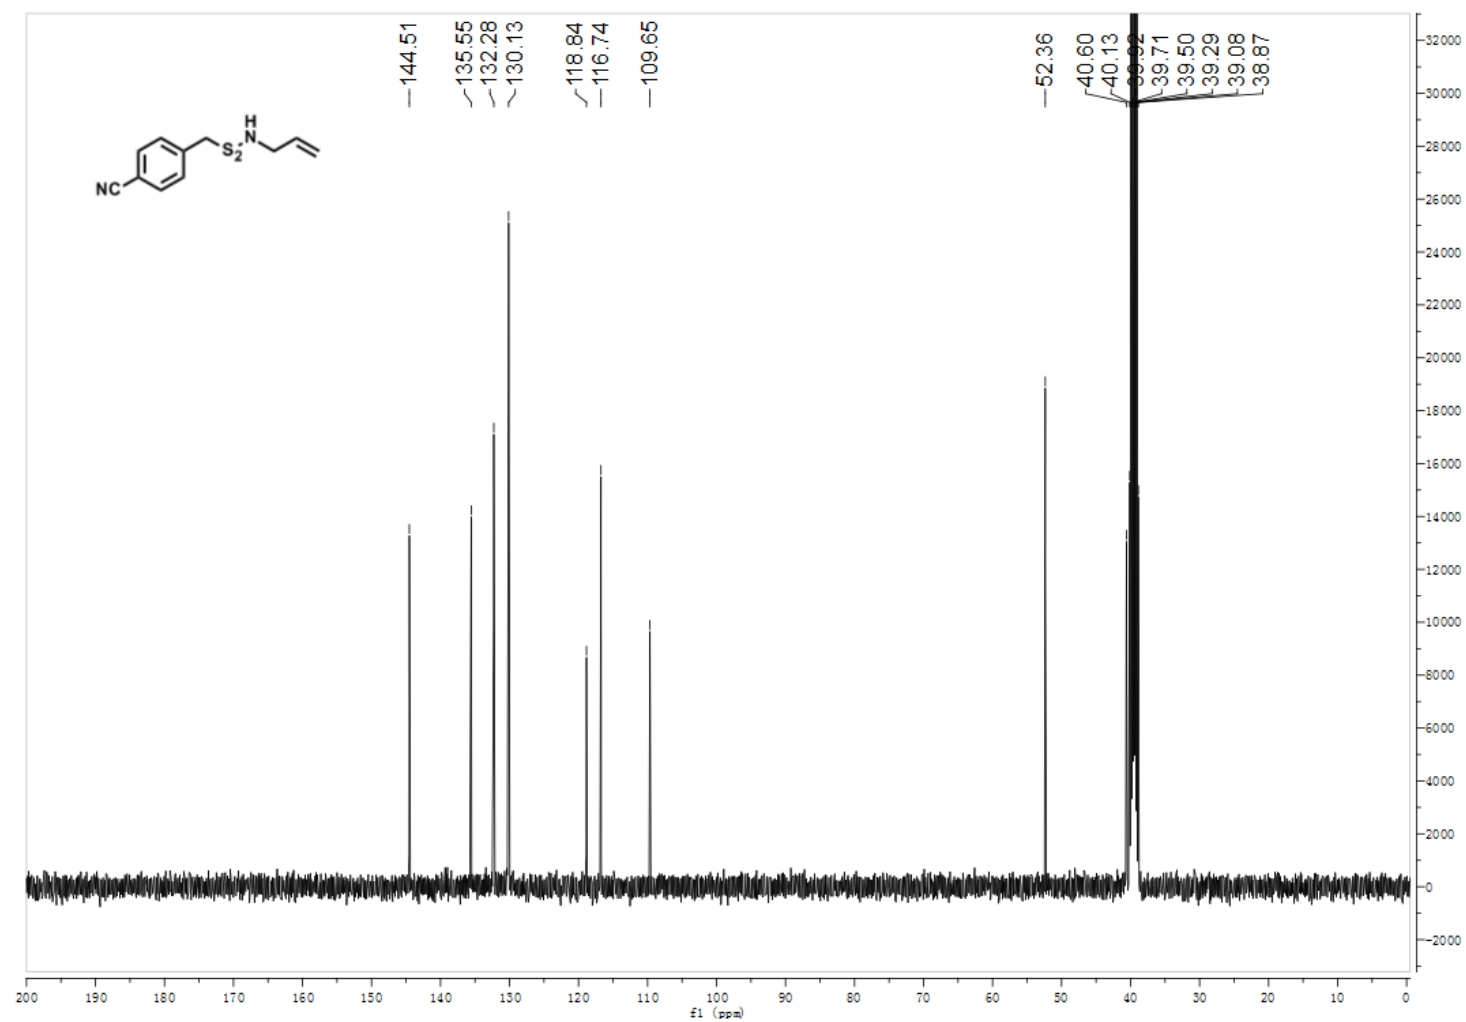

**Supplementary Figure 145.** <sup>13</sup>C NMR spectra for Compound **6i**.

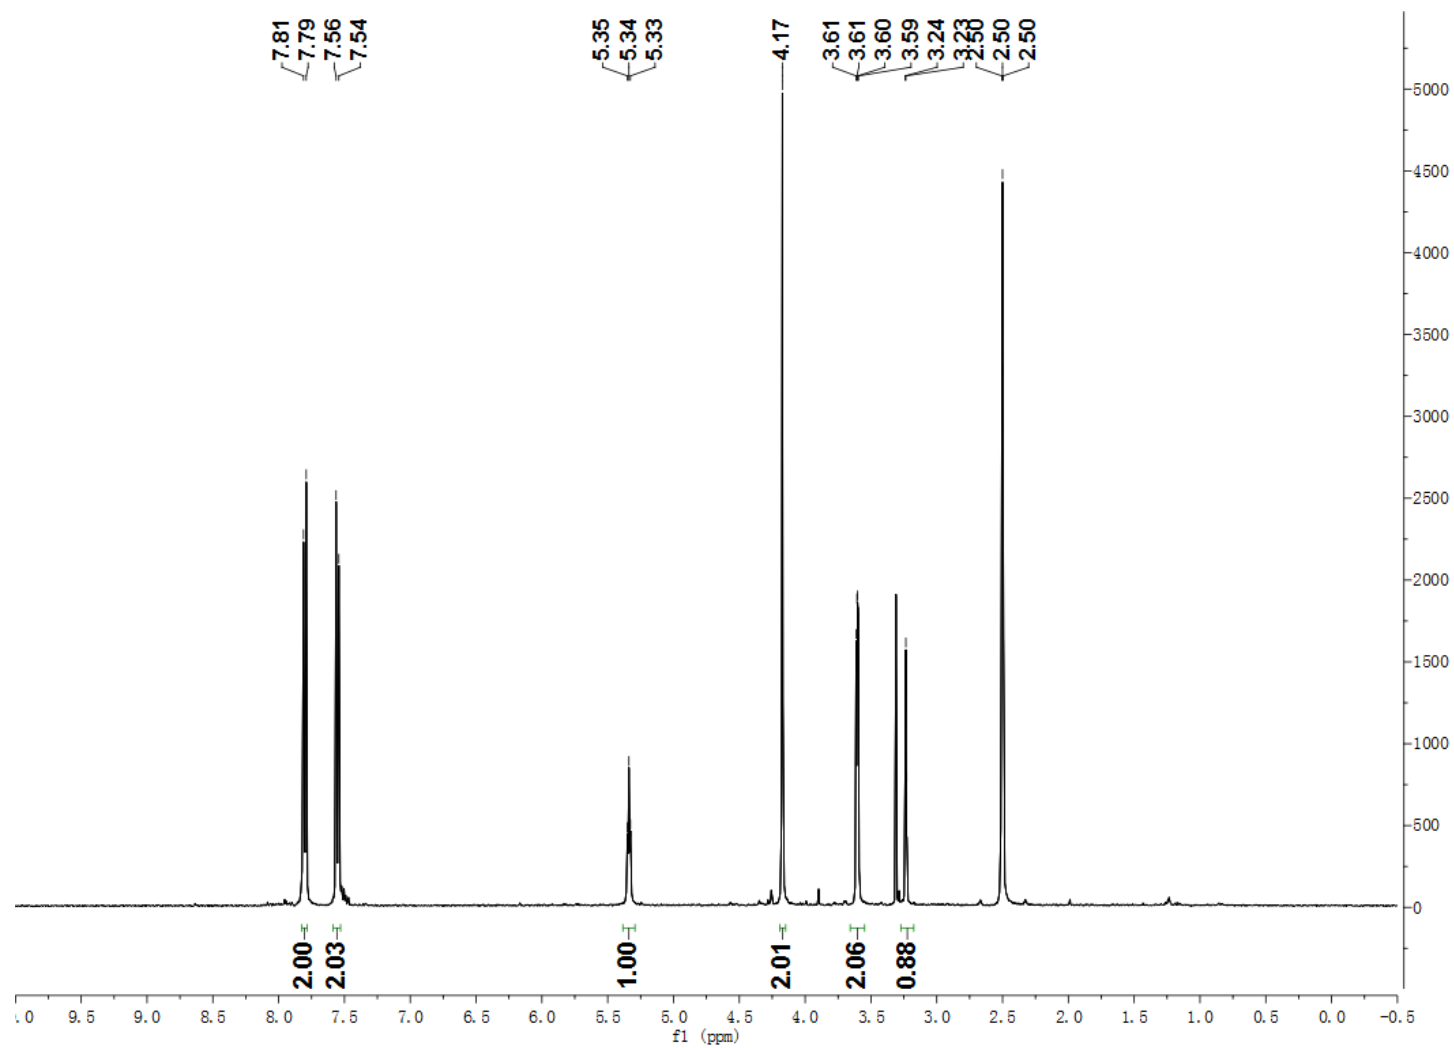

Supplementary Figure 146. <sup>1</sup>H NMR spectra for Compound 6j.

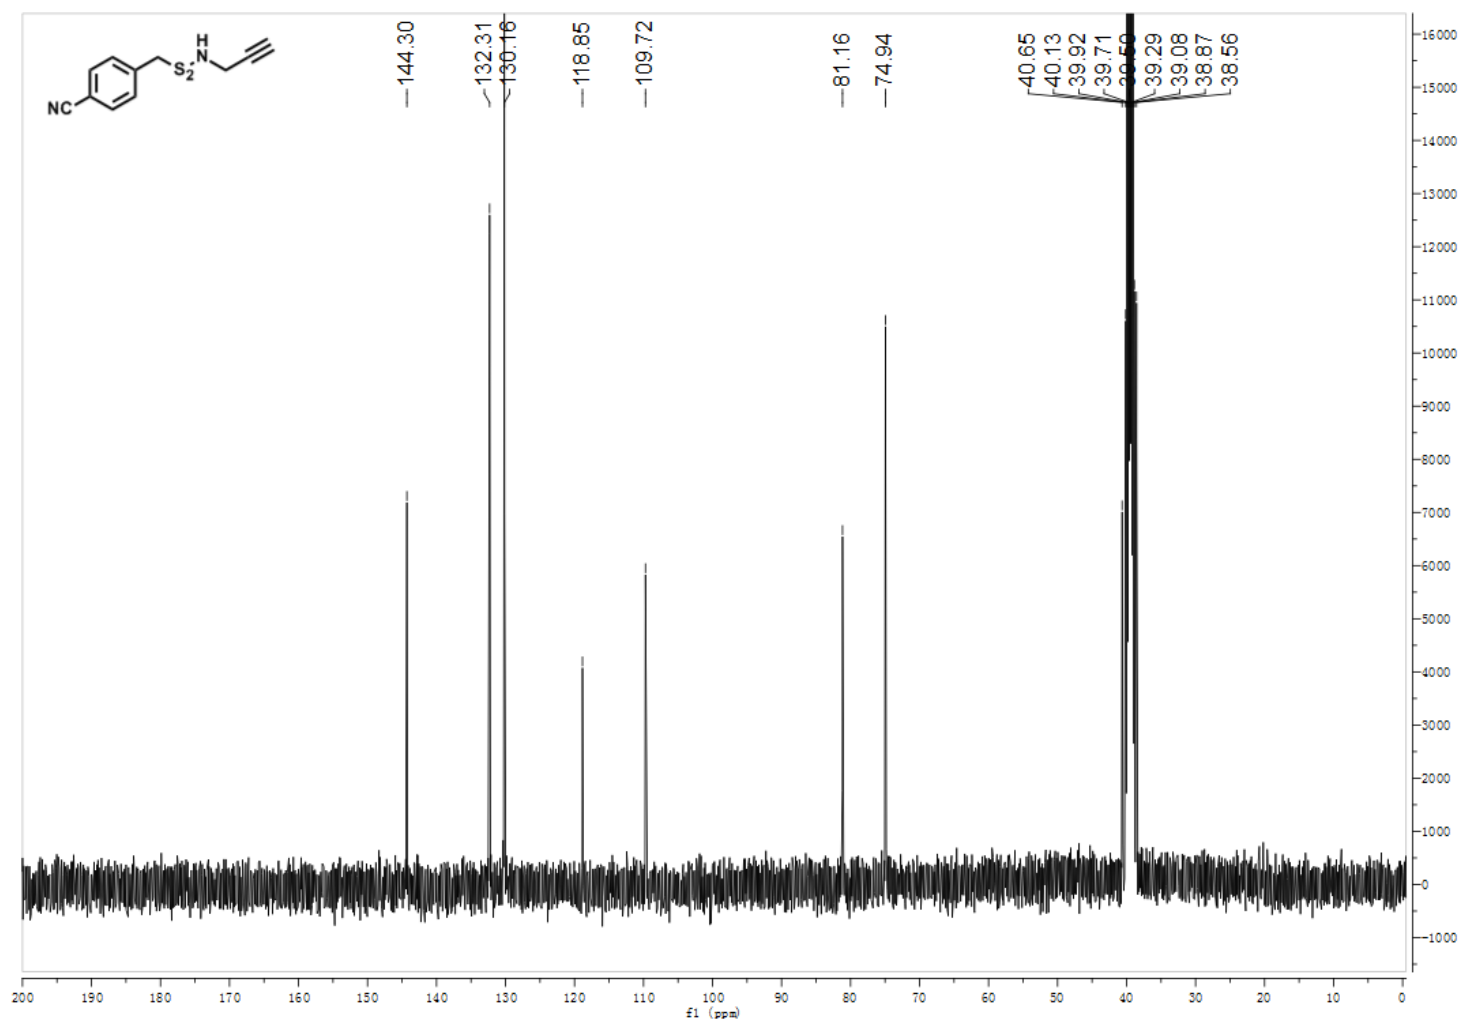

**Supplementary Figure 147.** <sup>13</sup>C NMR spectra for Compound **6j**.

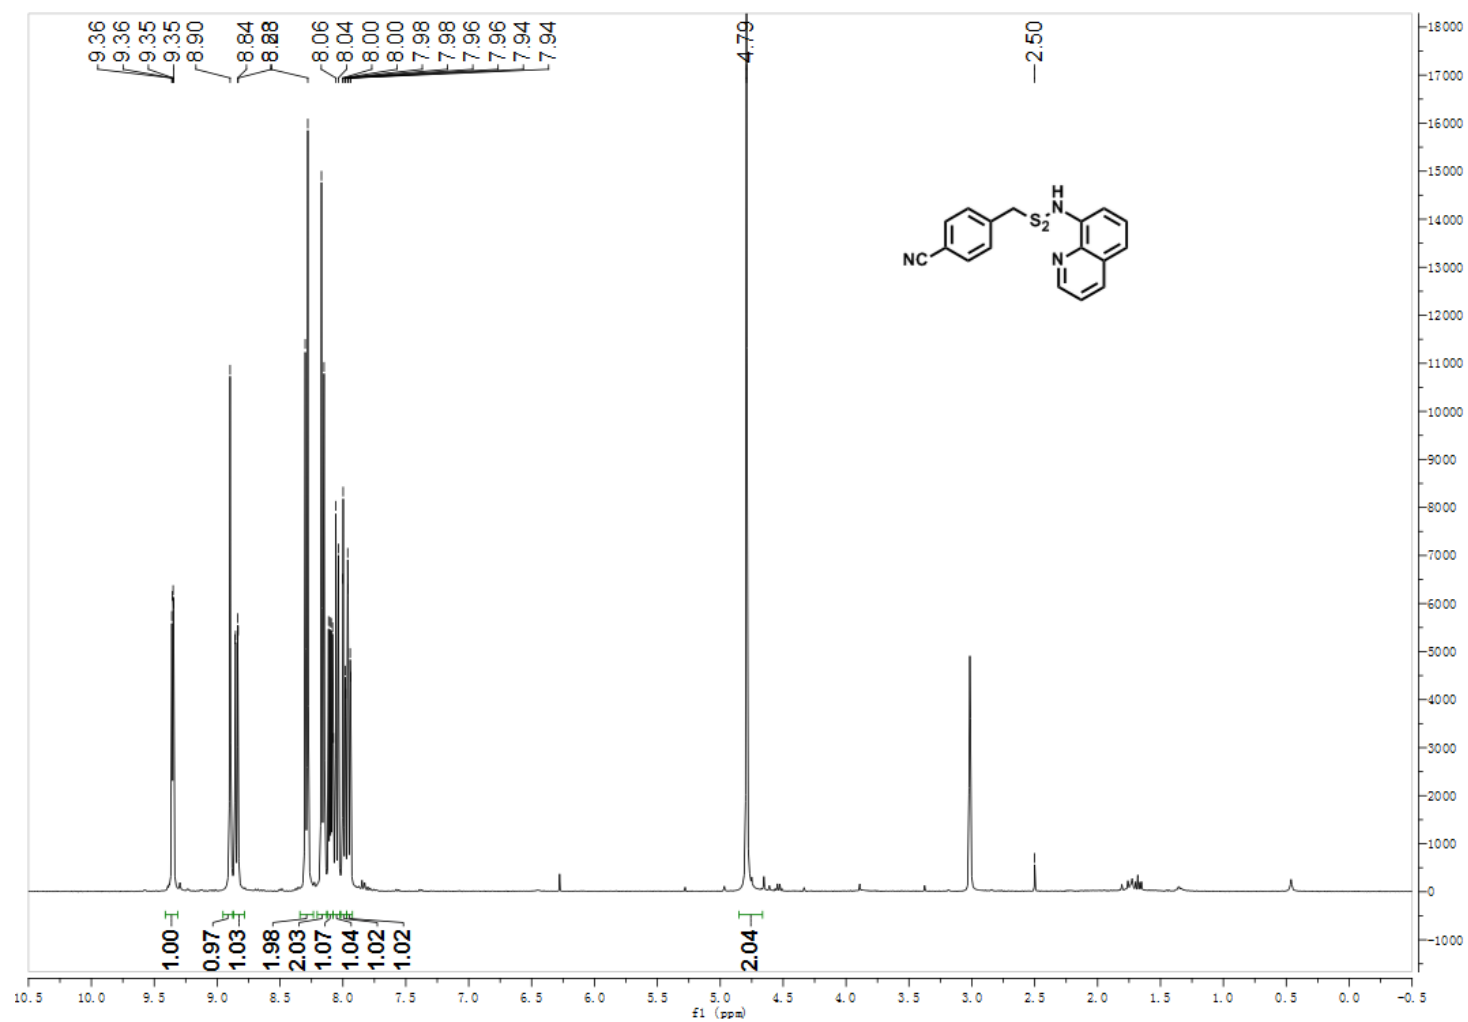

Supplementary Figure 148. <sup>1</sup>H NMR spectra for Compound **6k**.

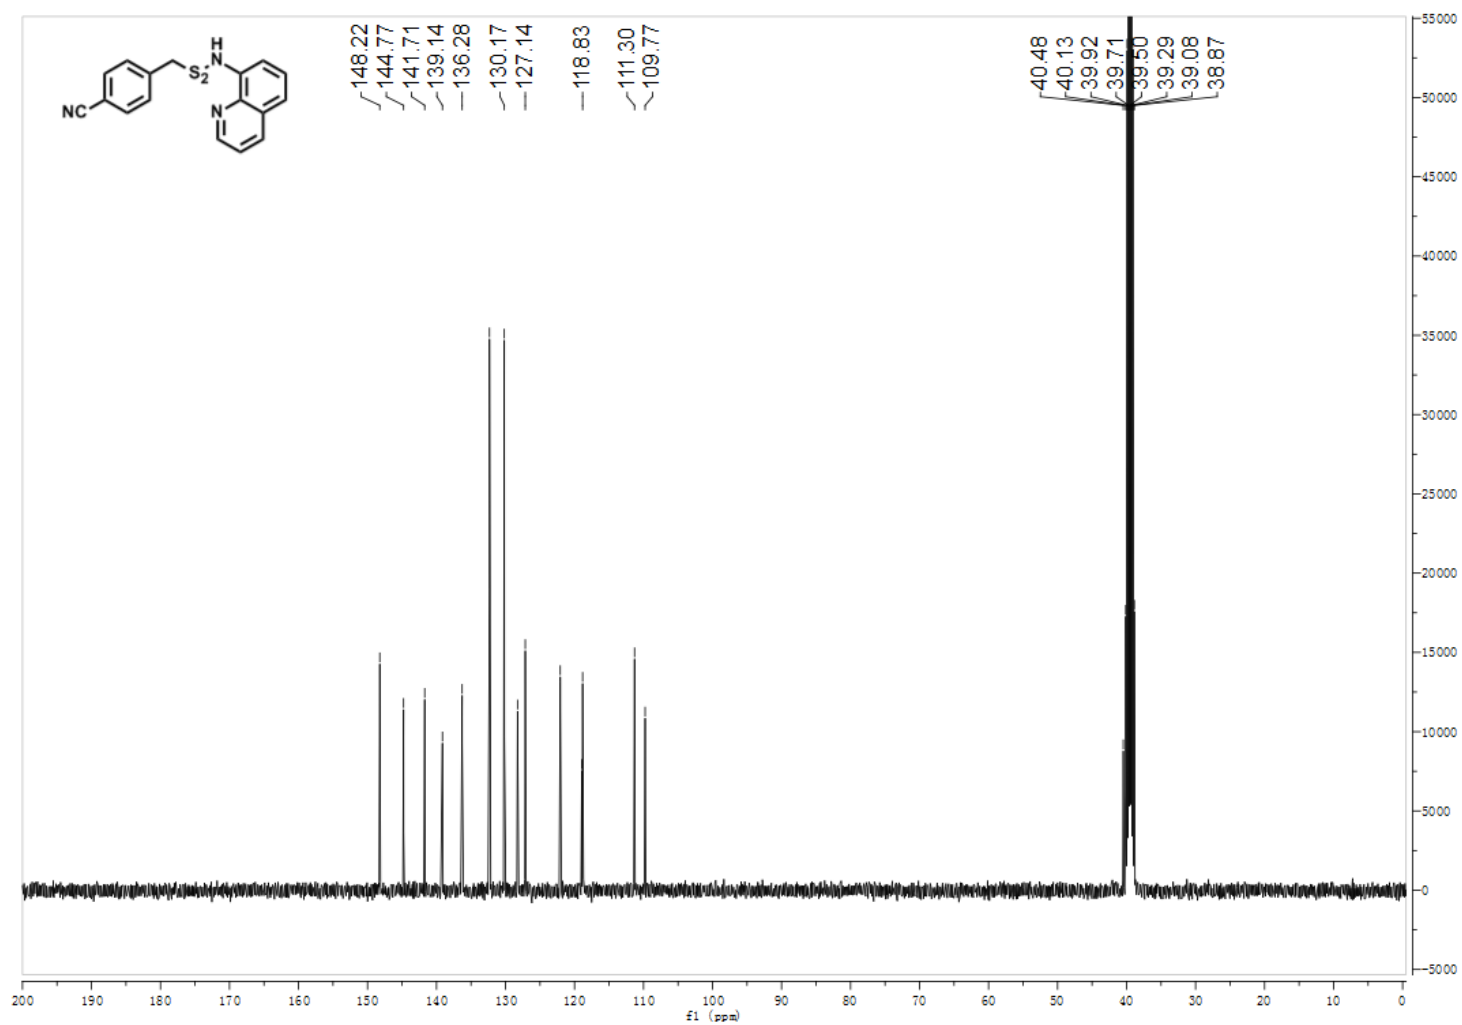

Supplementary Figure 149. <sup>13</sup>C NMR spectra for Compound 6k.

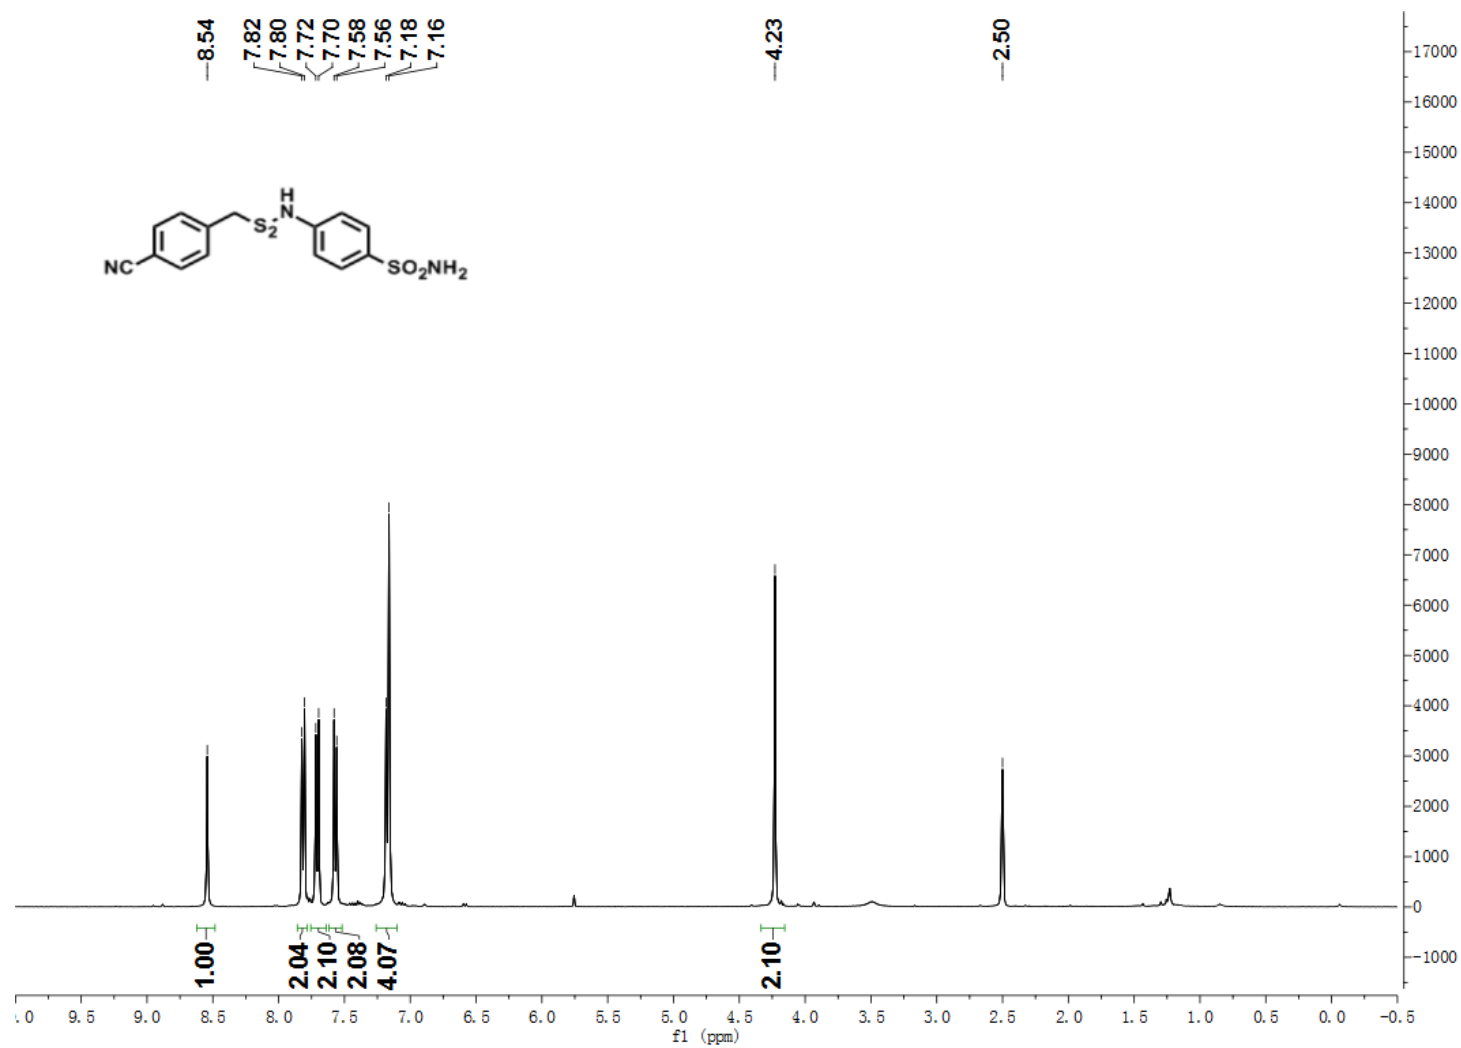

Supplementary Figure 150. <sup>1</sup>H NMR spectra for Compound 6l.

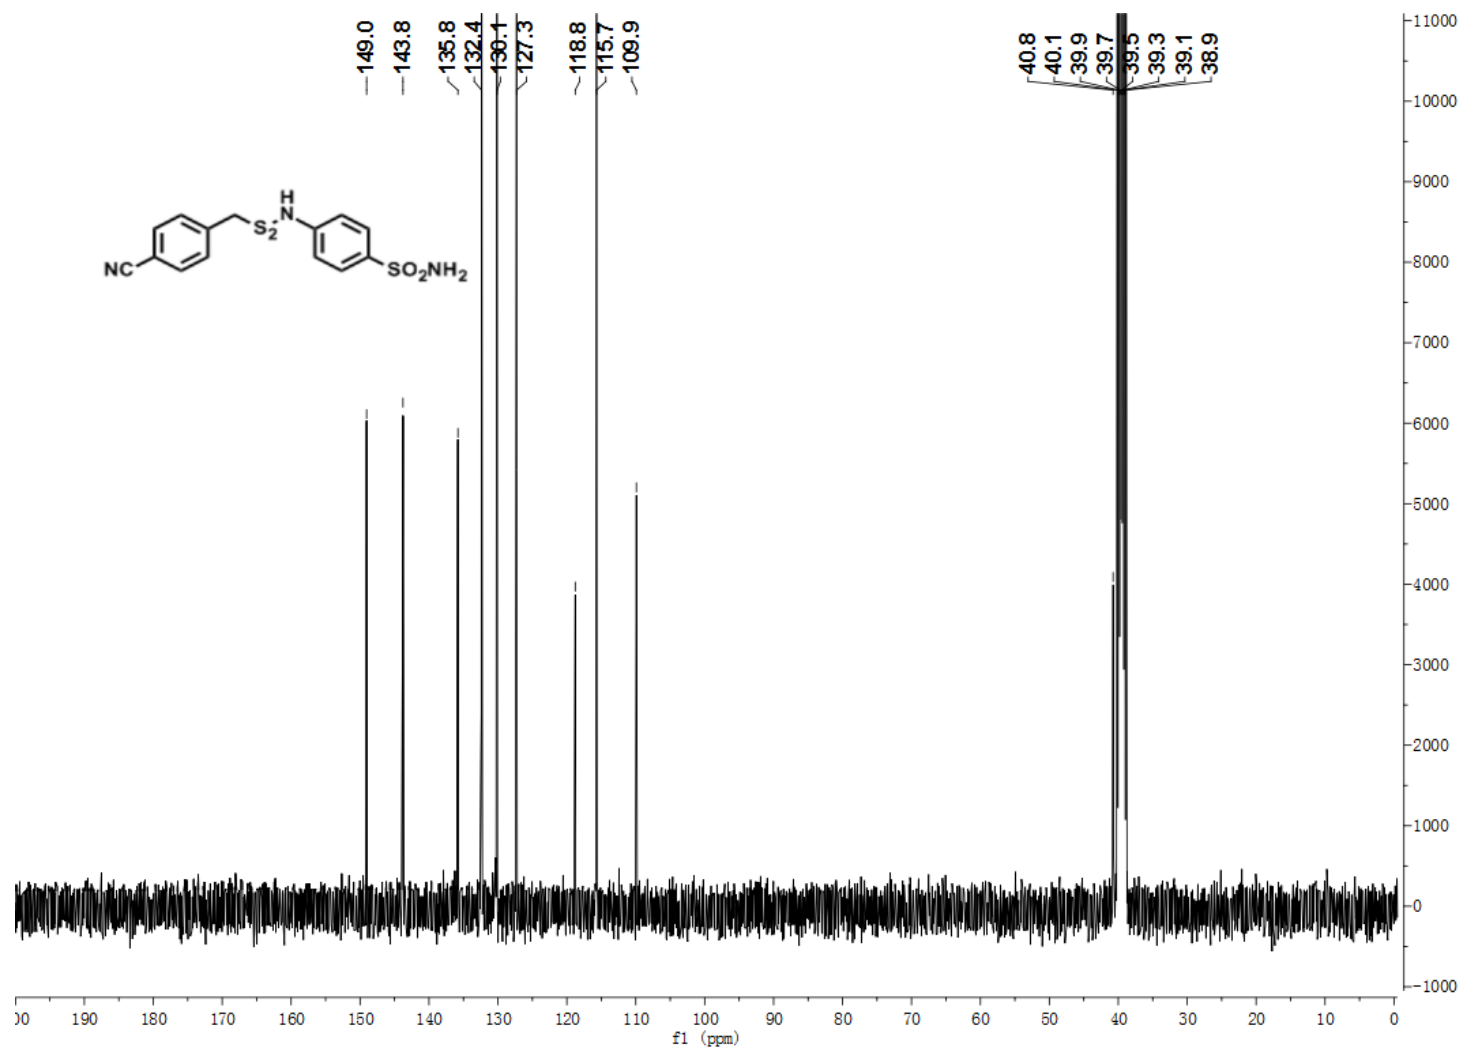

Supplementary Figure 151. <sup>13</sup>C NMR spectra for Compound 6l.

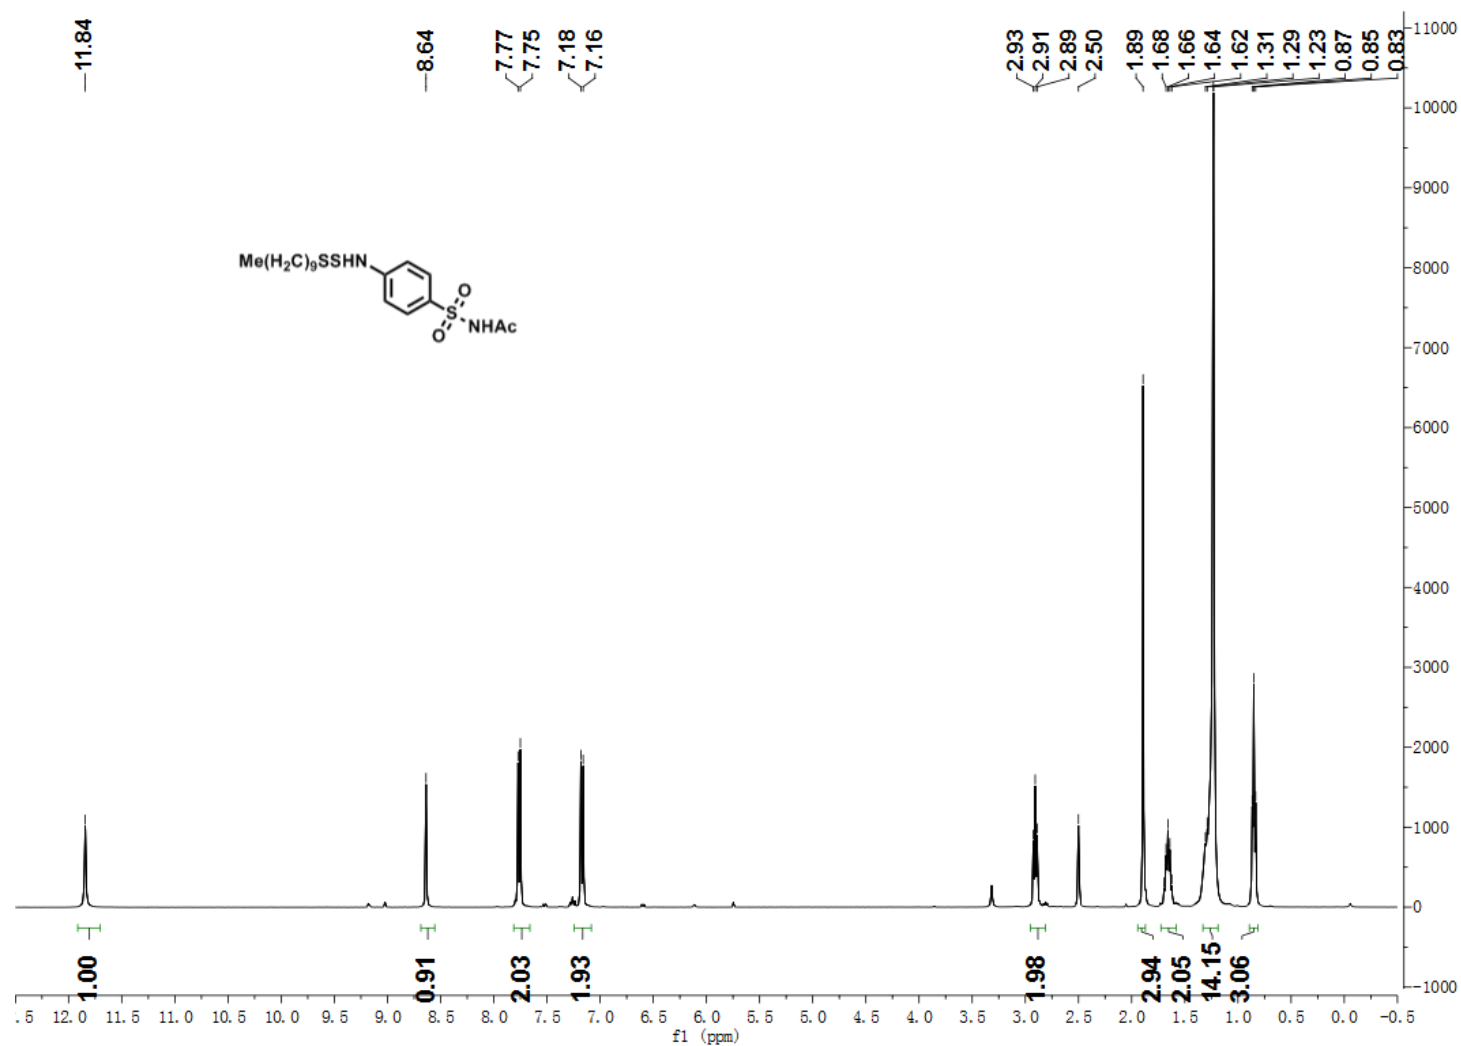

Supplementary Figure 152. <sup>1</sup>H NMR spectra for Compound 6m.

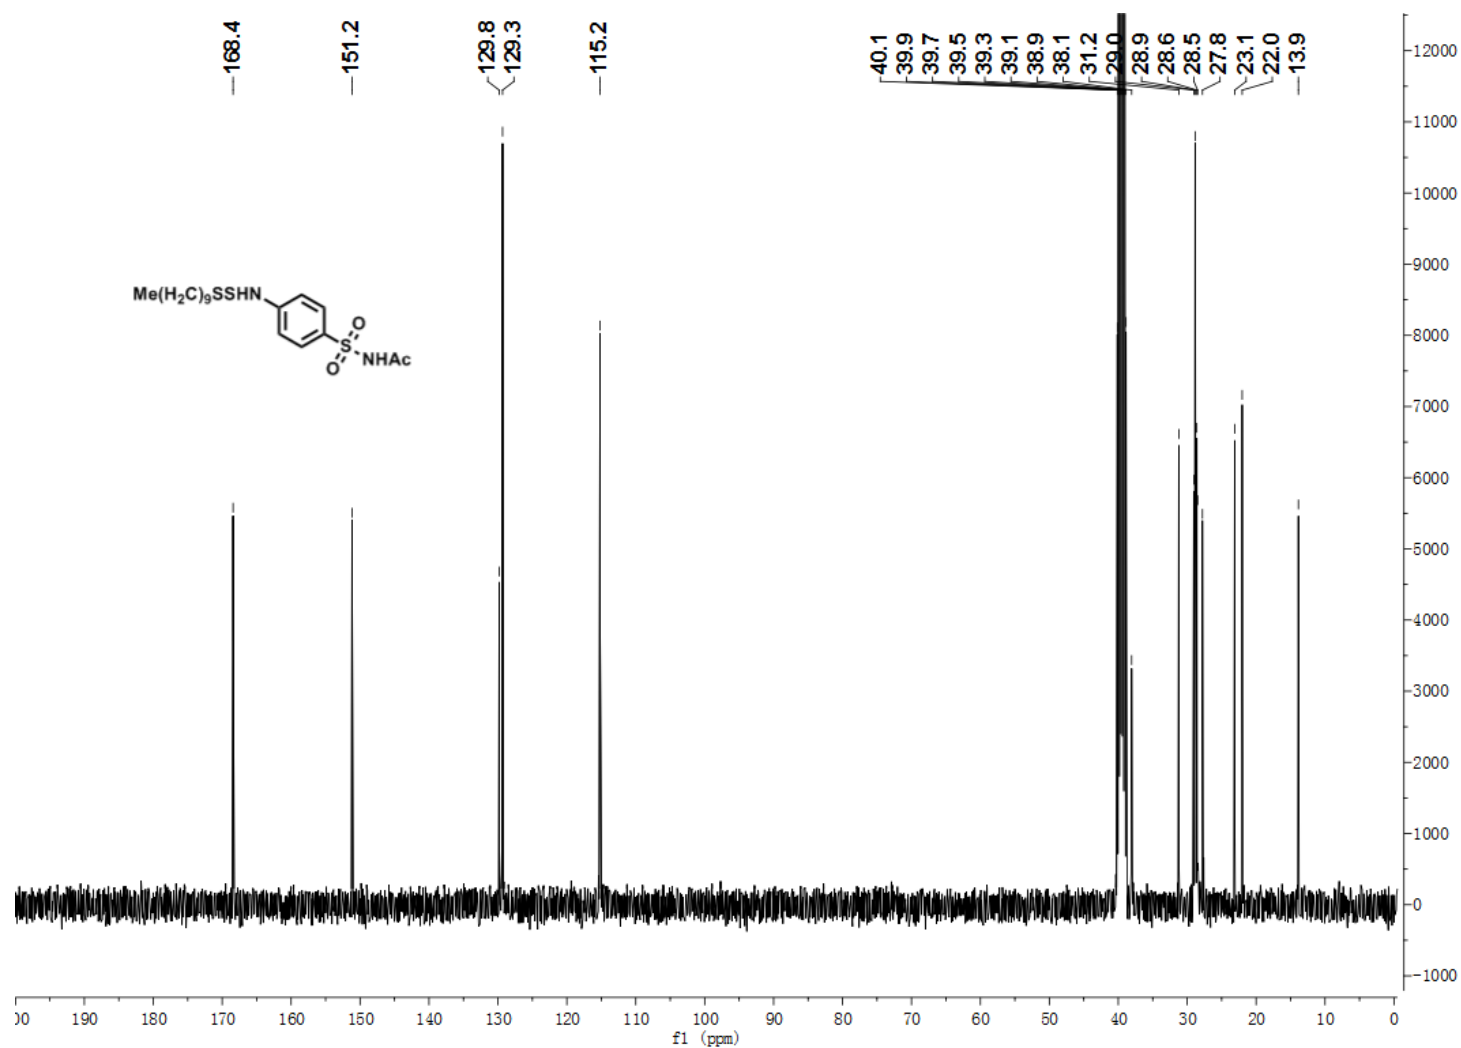

Supplementary Figure 153. <sup>13</sup>C NMR spectra for Compound 6m.

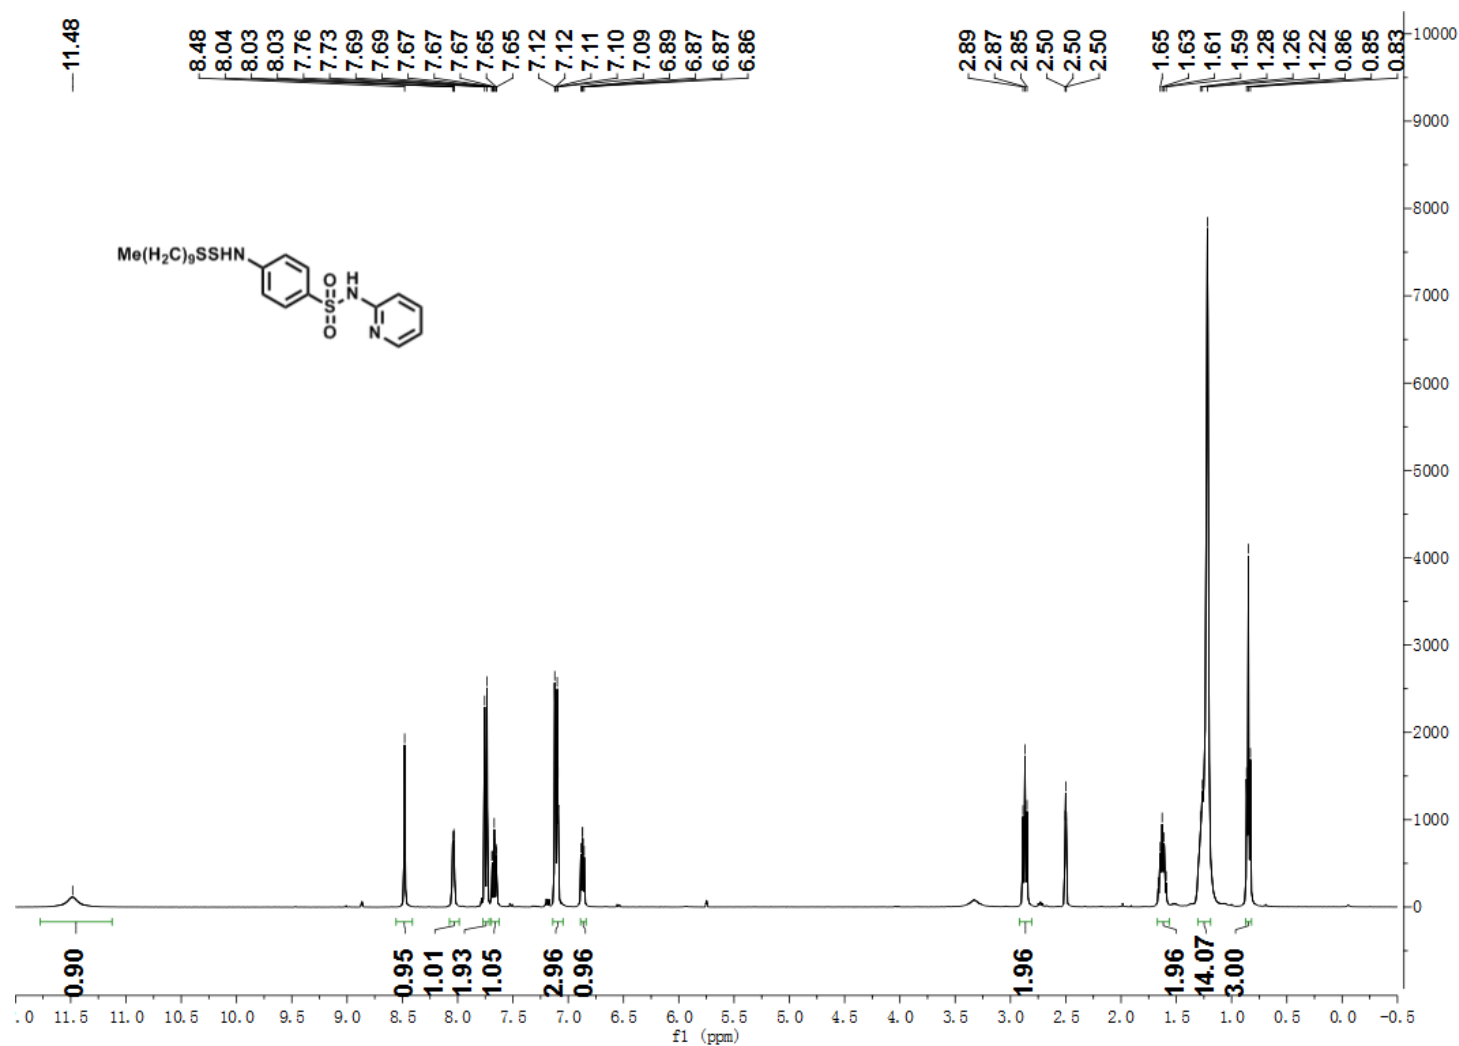

Supplementary Figure 154. <sup>1</sup>H NMR spectra for Compound 6n.

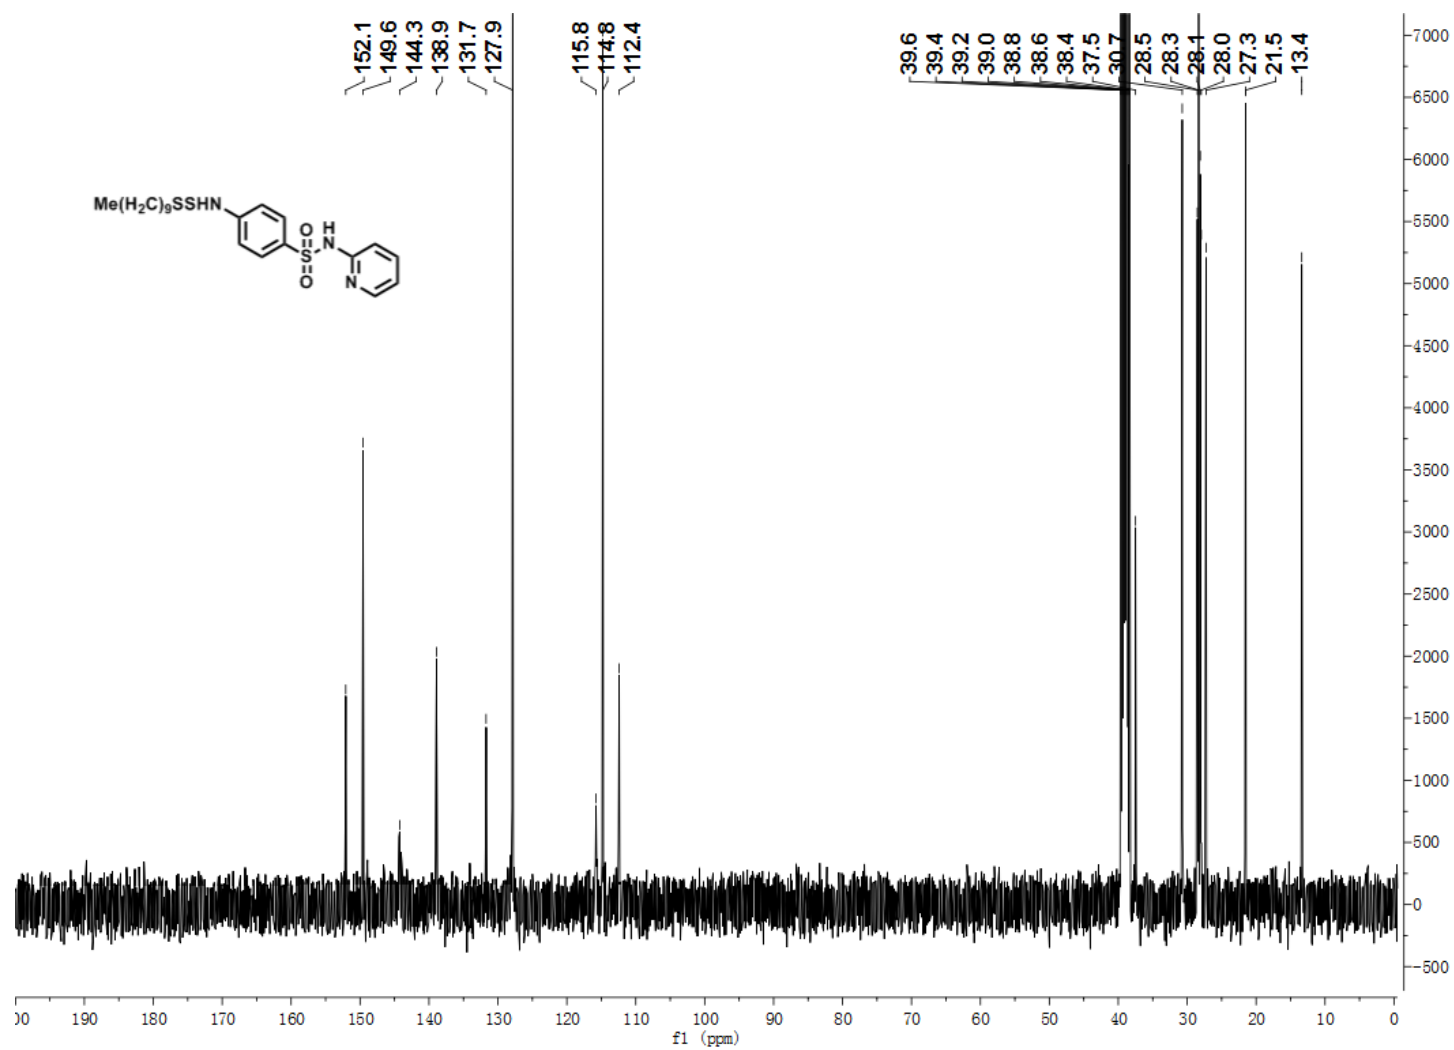

Supplementary Figure 155. <sup>13</sup>C NMR spectra for Compound 6n.

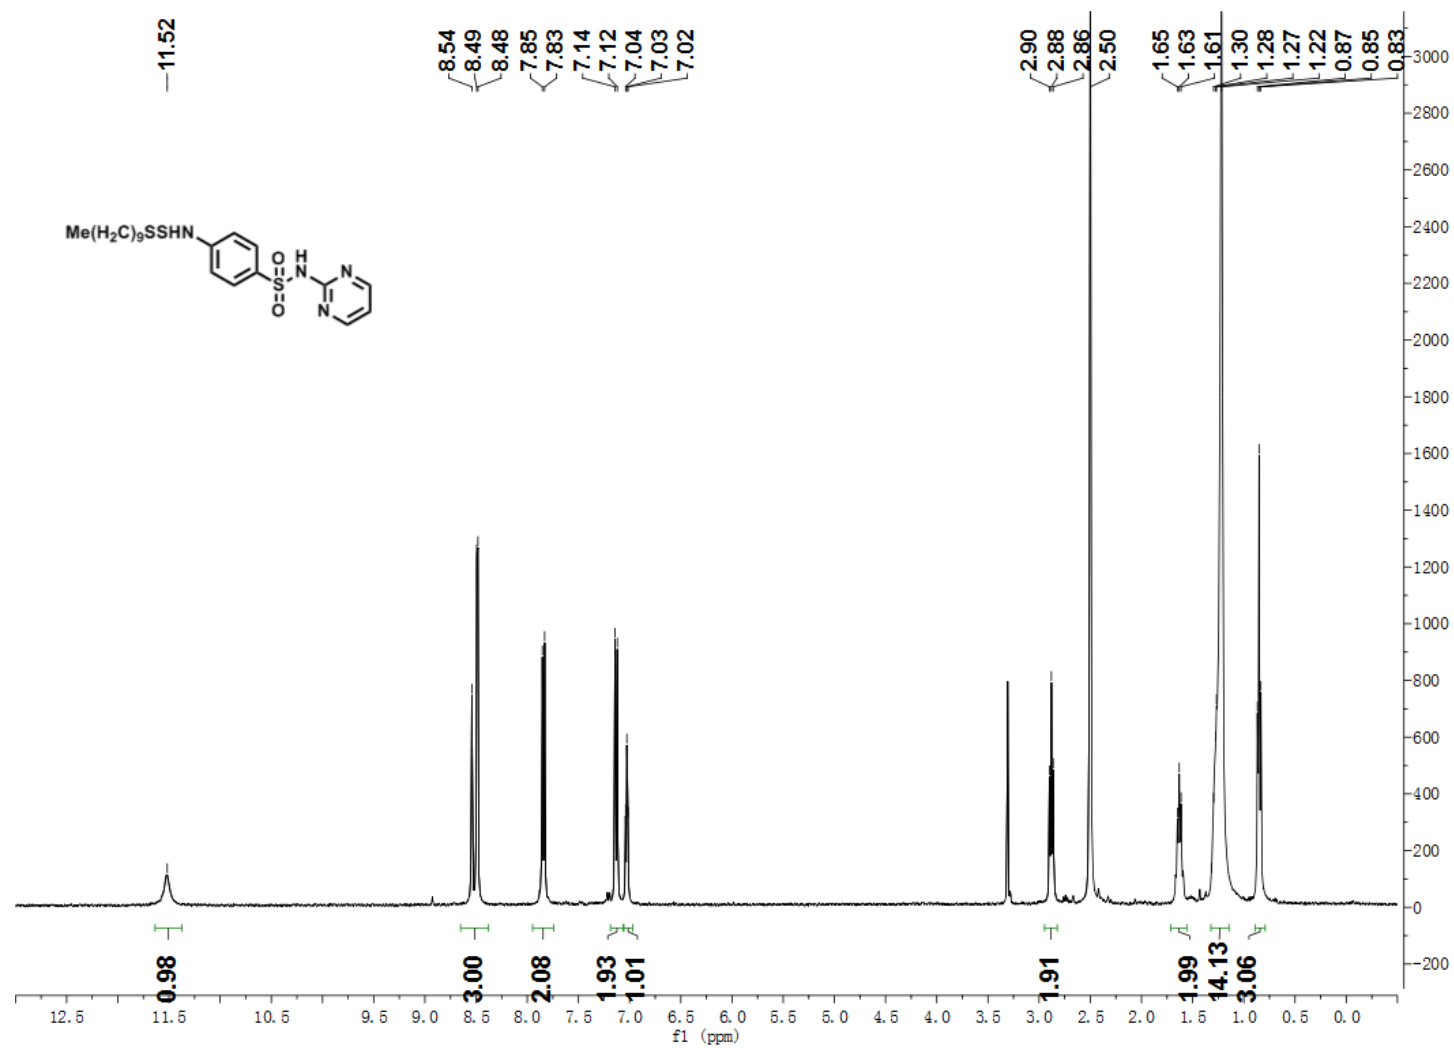

Supplementary Figure 156. <sup>1</sup>H NMR spectra for Compound 60.

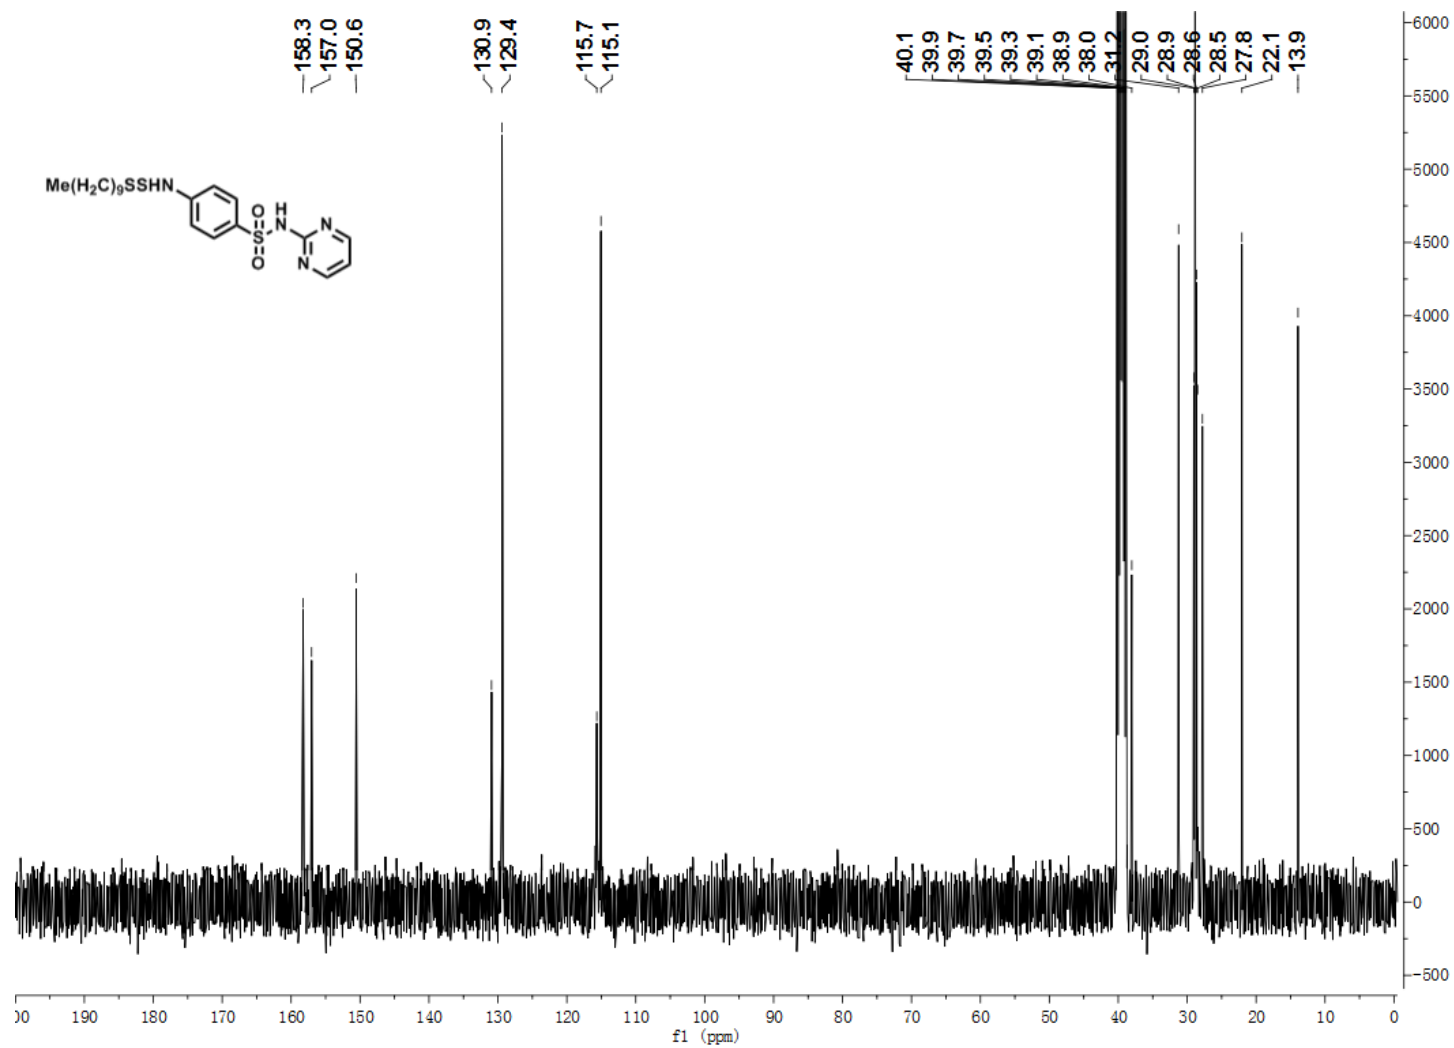

Supplementary Figure 157. <sup>13</sup>C NMR spectra for Compound 6o.

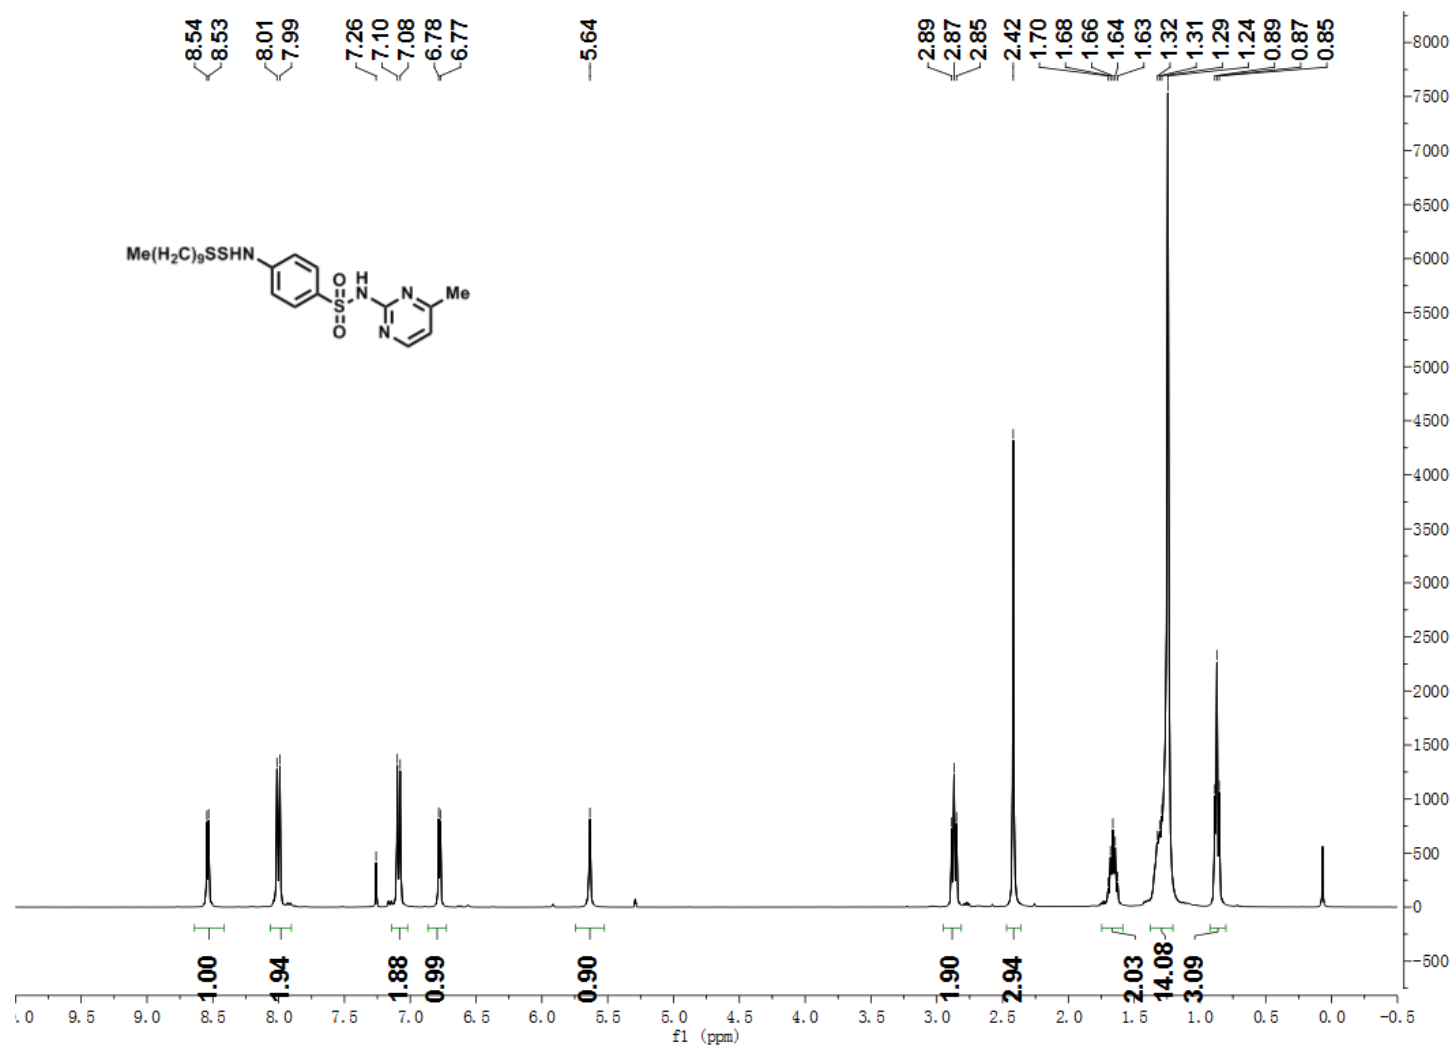

Supplementary Figure 158. <sup>1</sup>H NMR spectra for Compound 6p.

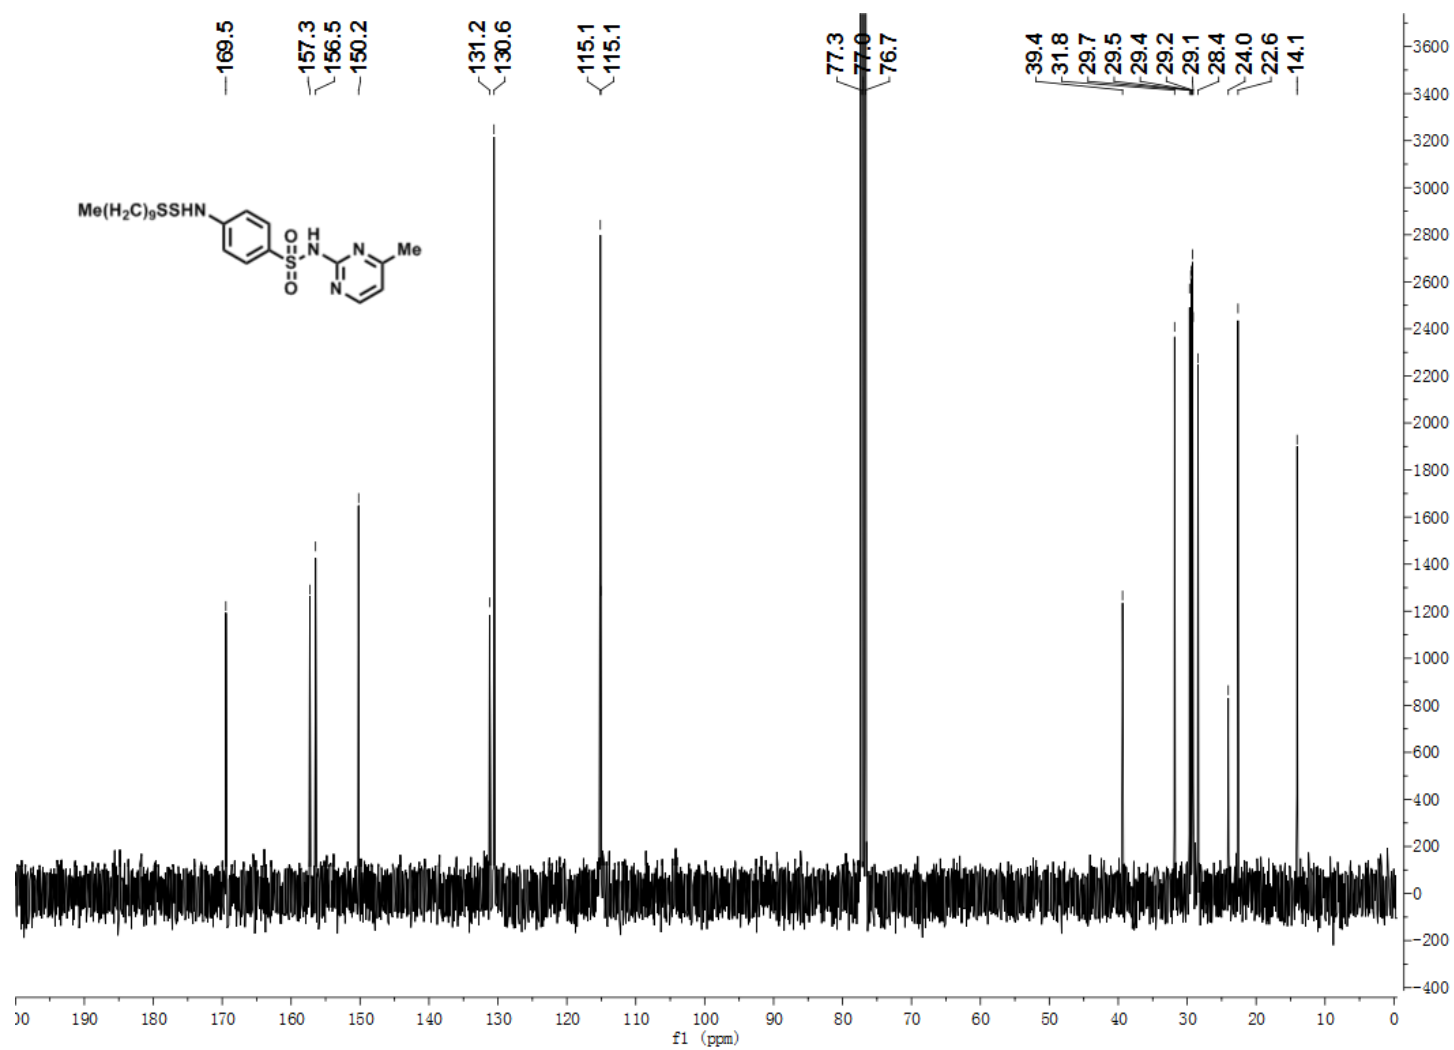

Supplementary Figure 159. <sup>13</sup>C NMR spectra for Compound 6p.

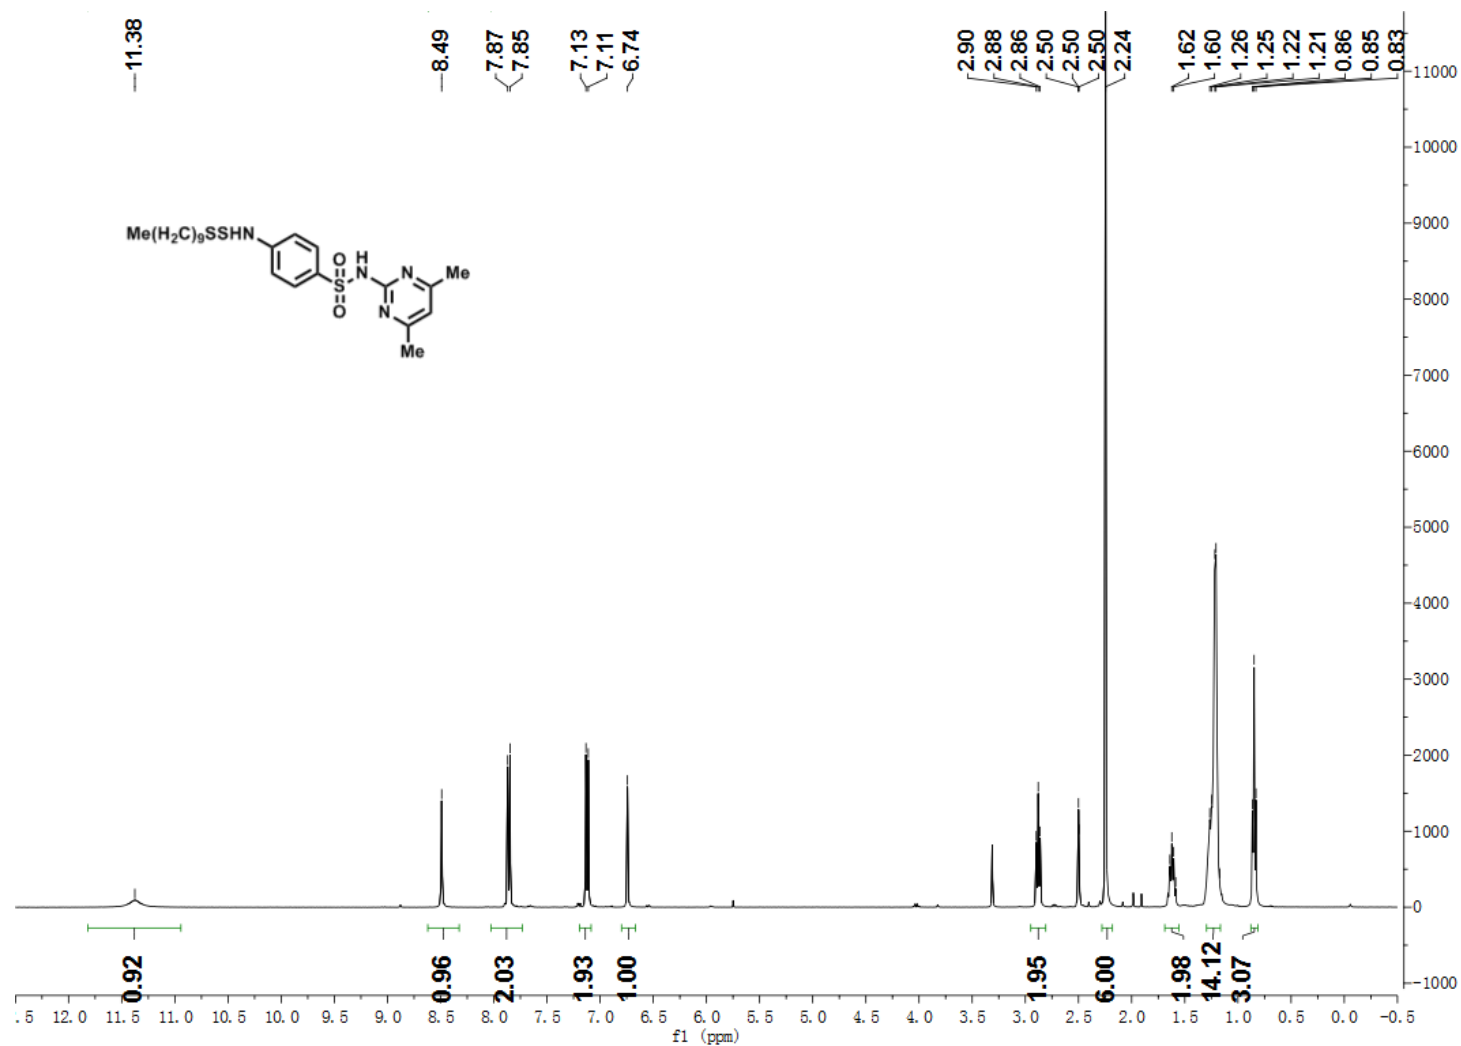

Supplementary Figure 160. <sup>1</sup>H NMR spectra for Compound 6q.

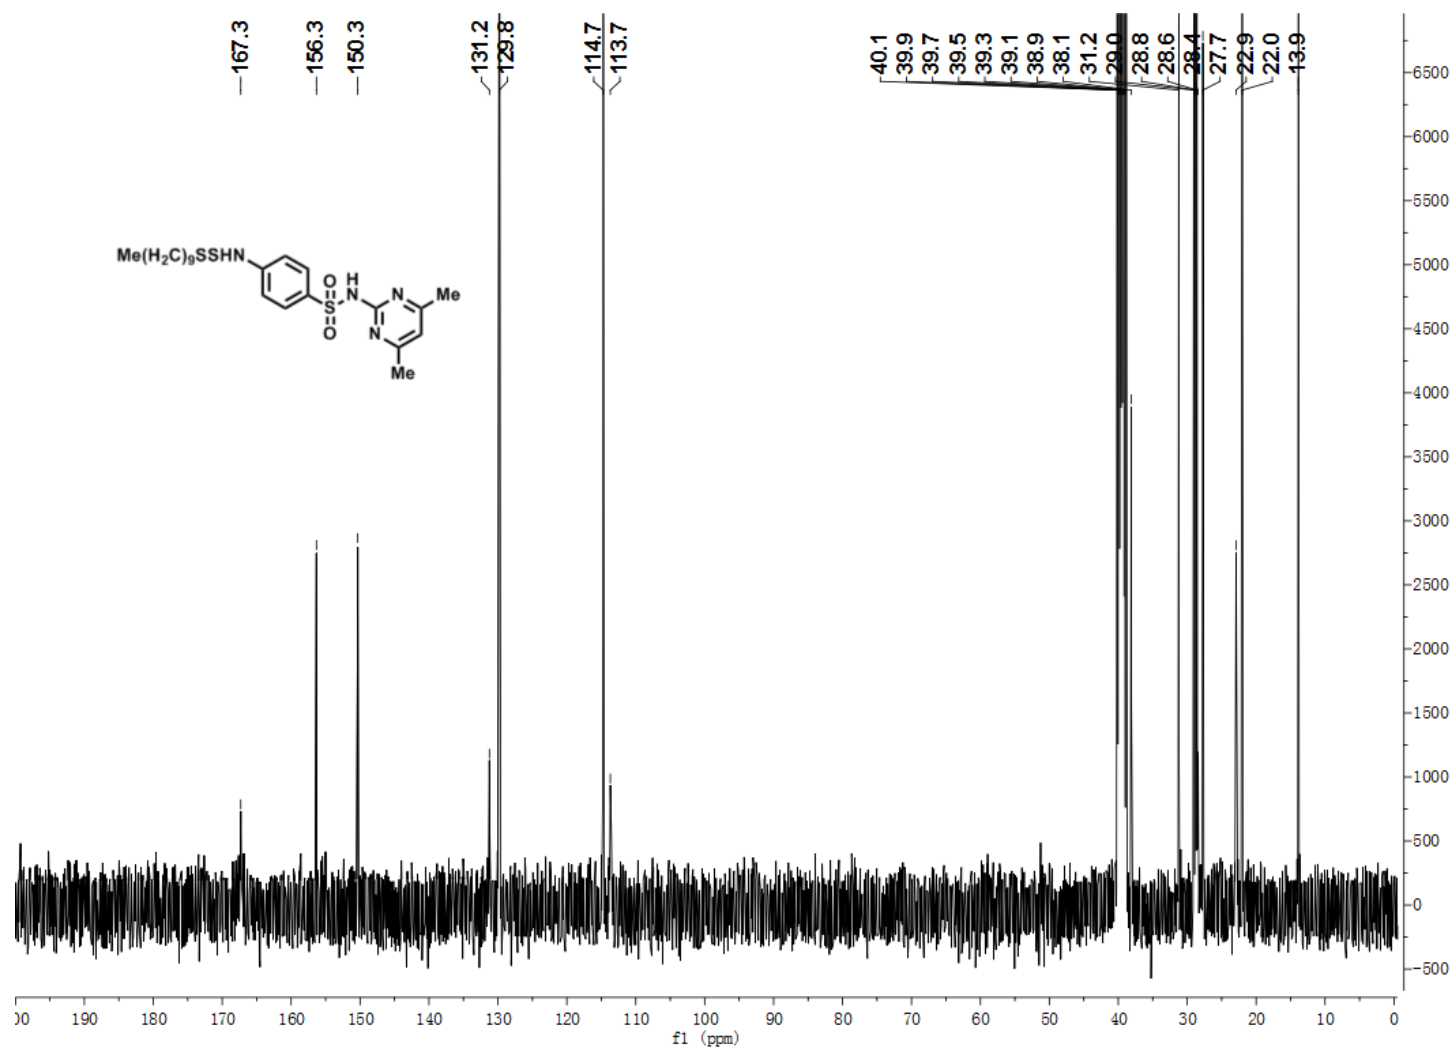

Supplementary Figure 161. <sup>13</sup>C NMR spectra for Compound 6q.

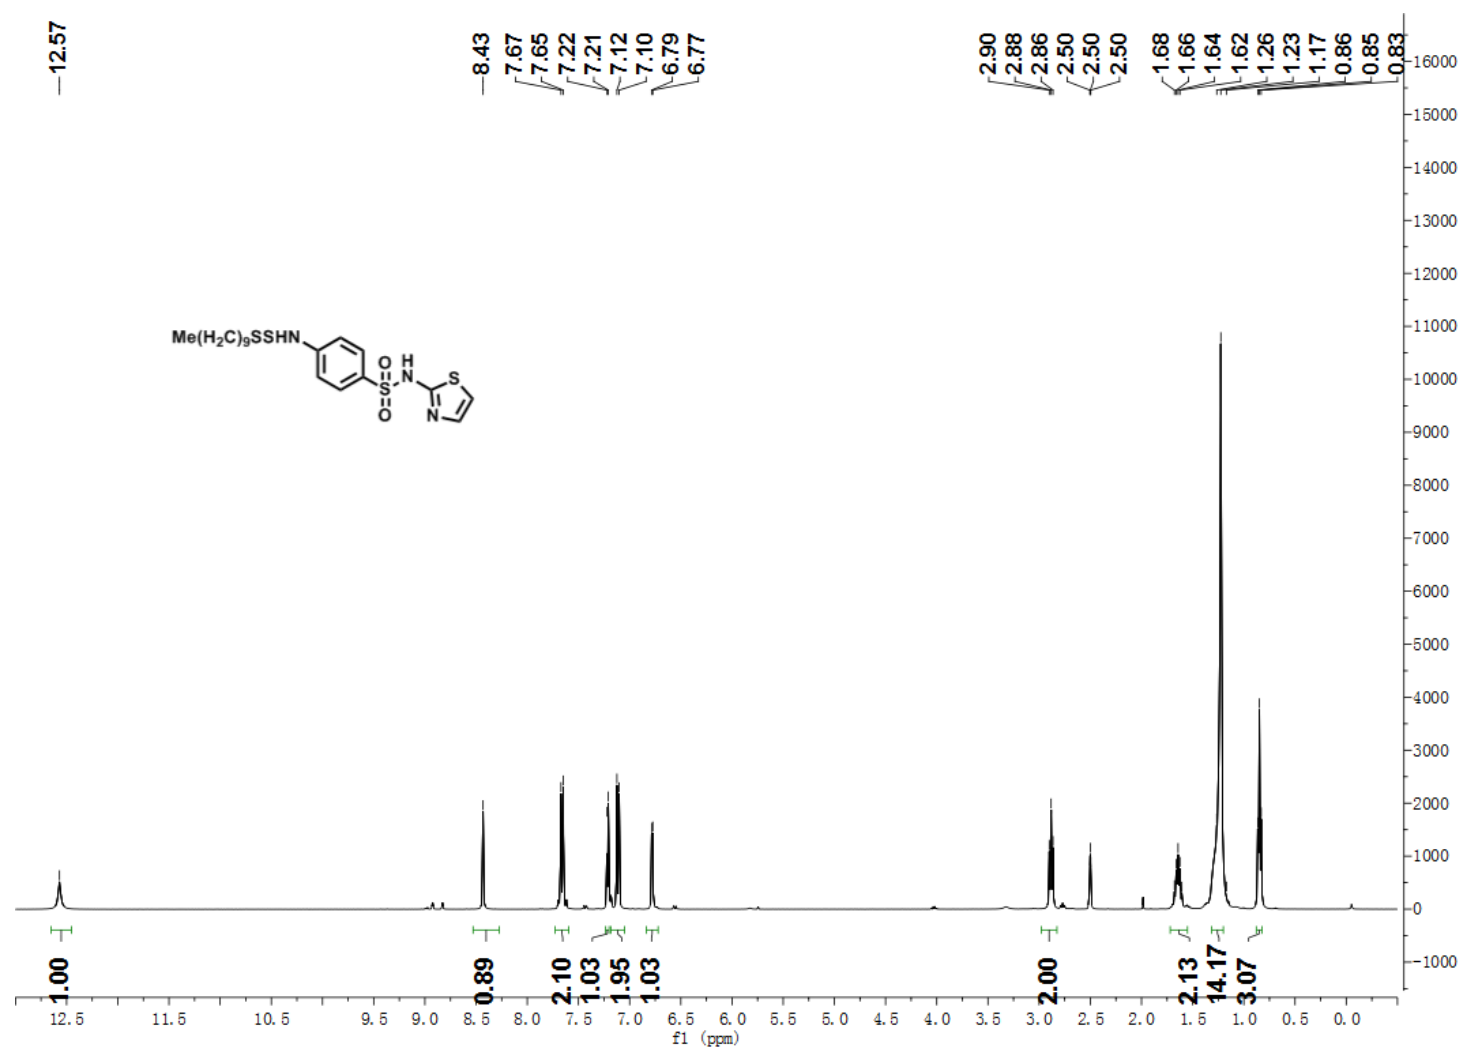

Supplementary Figure 162.  $^1\text{H}$  NMR spectra for Compound 6r.

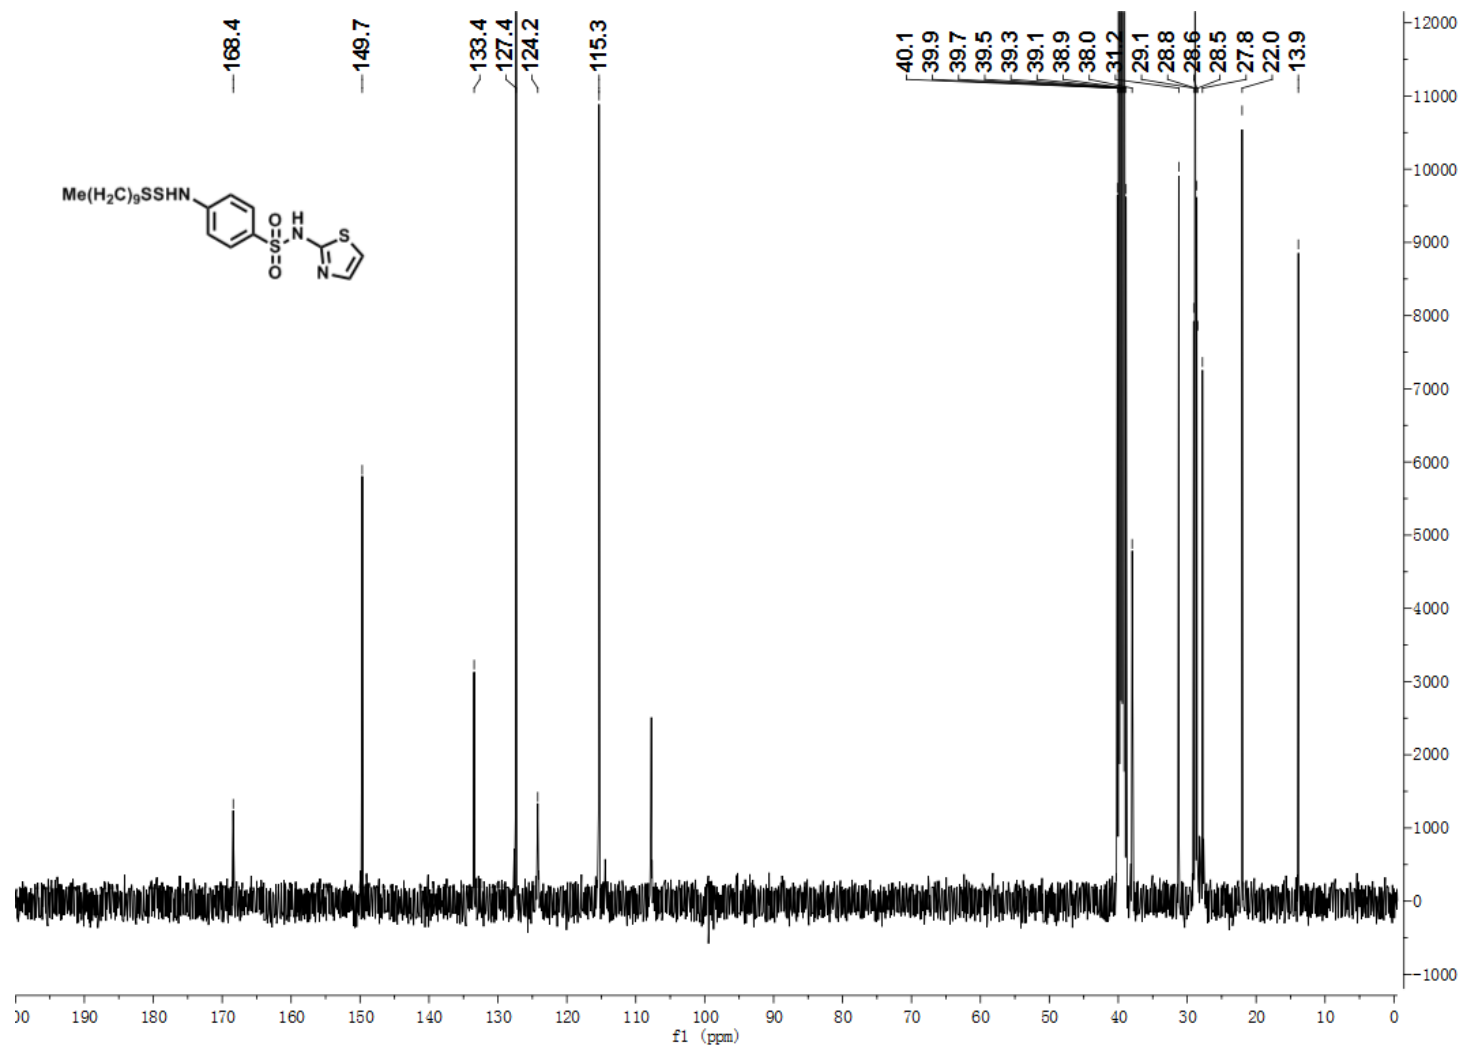

**Supplementary Figure 163.** <sup>13</sup>C NMR spectra for Compound 6r.

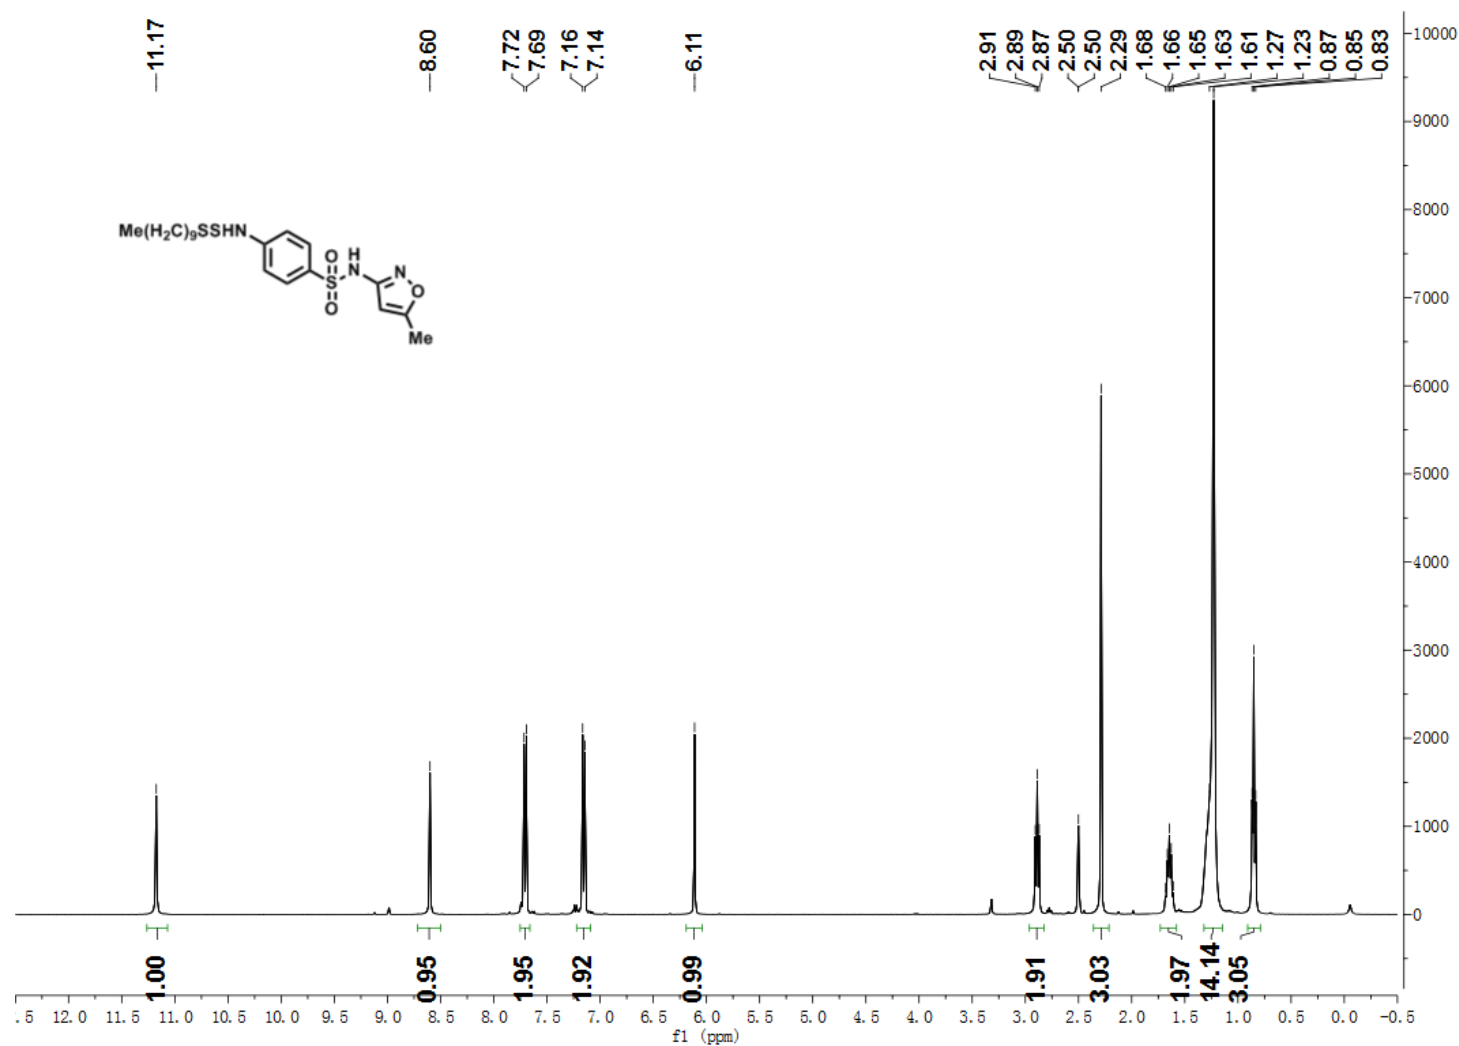

Supplementary Figure 164. <sup>1</sup>H NMR spectra for Compound 6s.

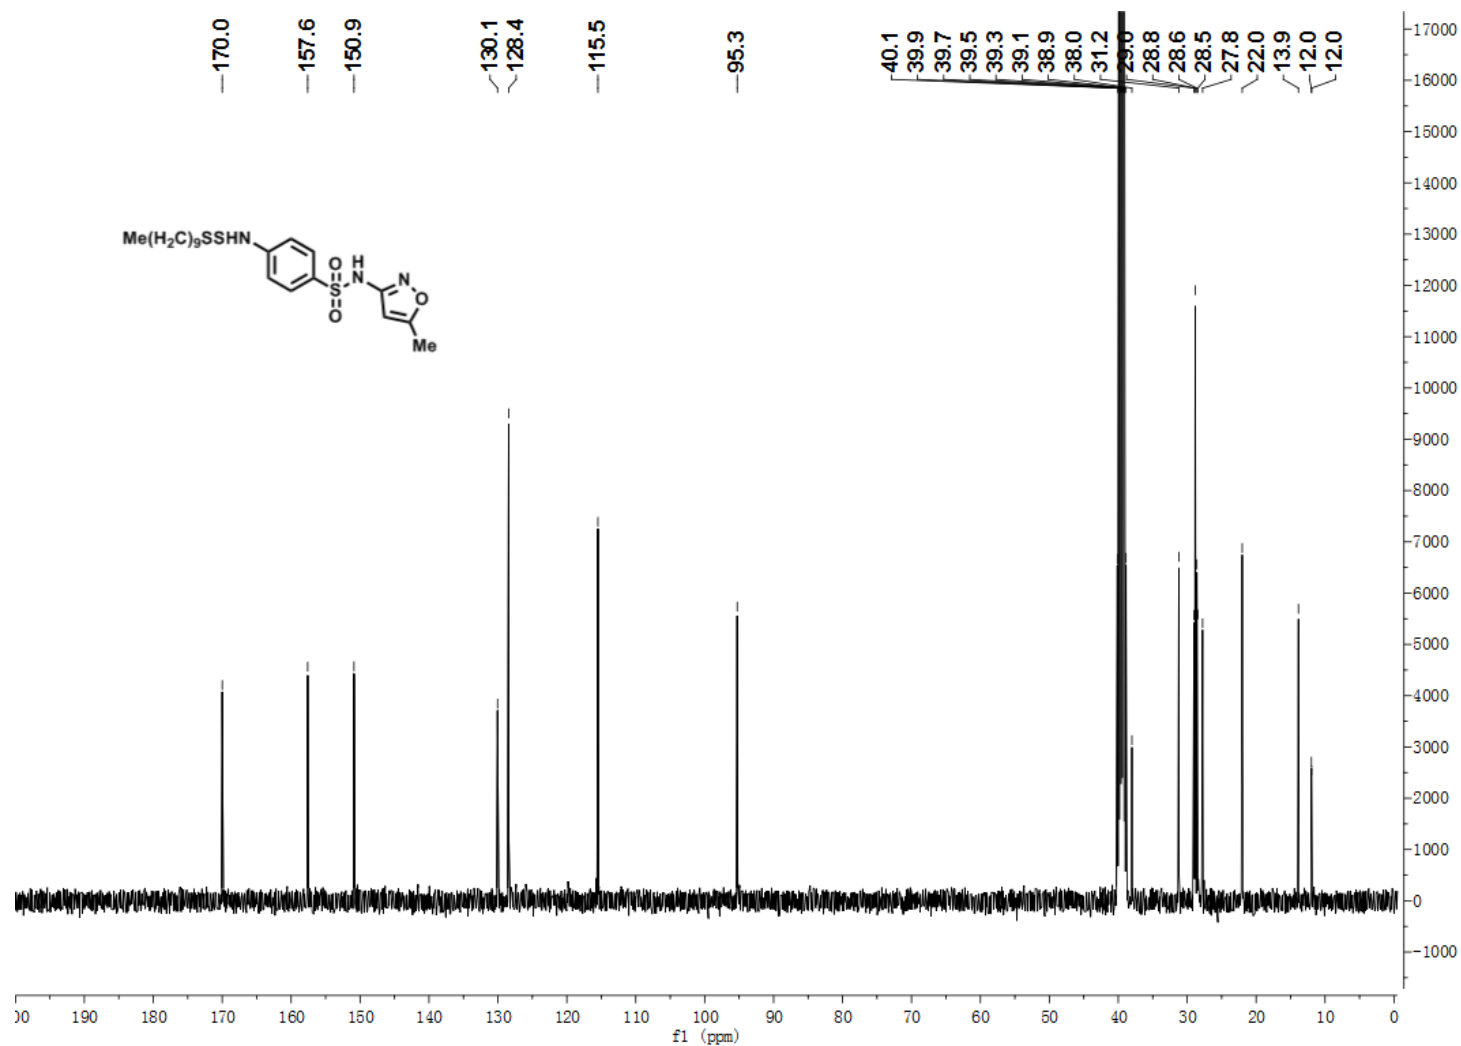

Supplementary Figure 165. <sup>13</sup>C NMR spectra for Compound 6s.

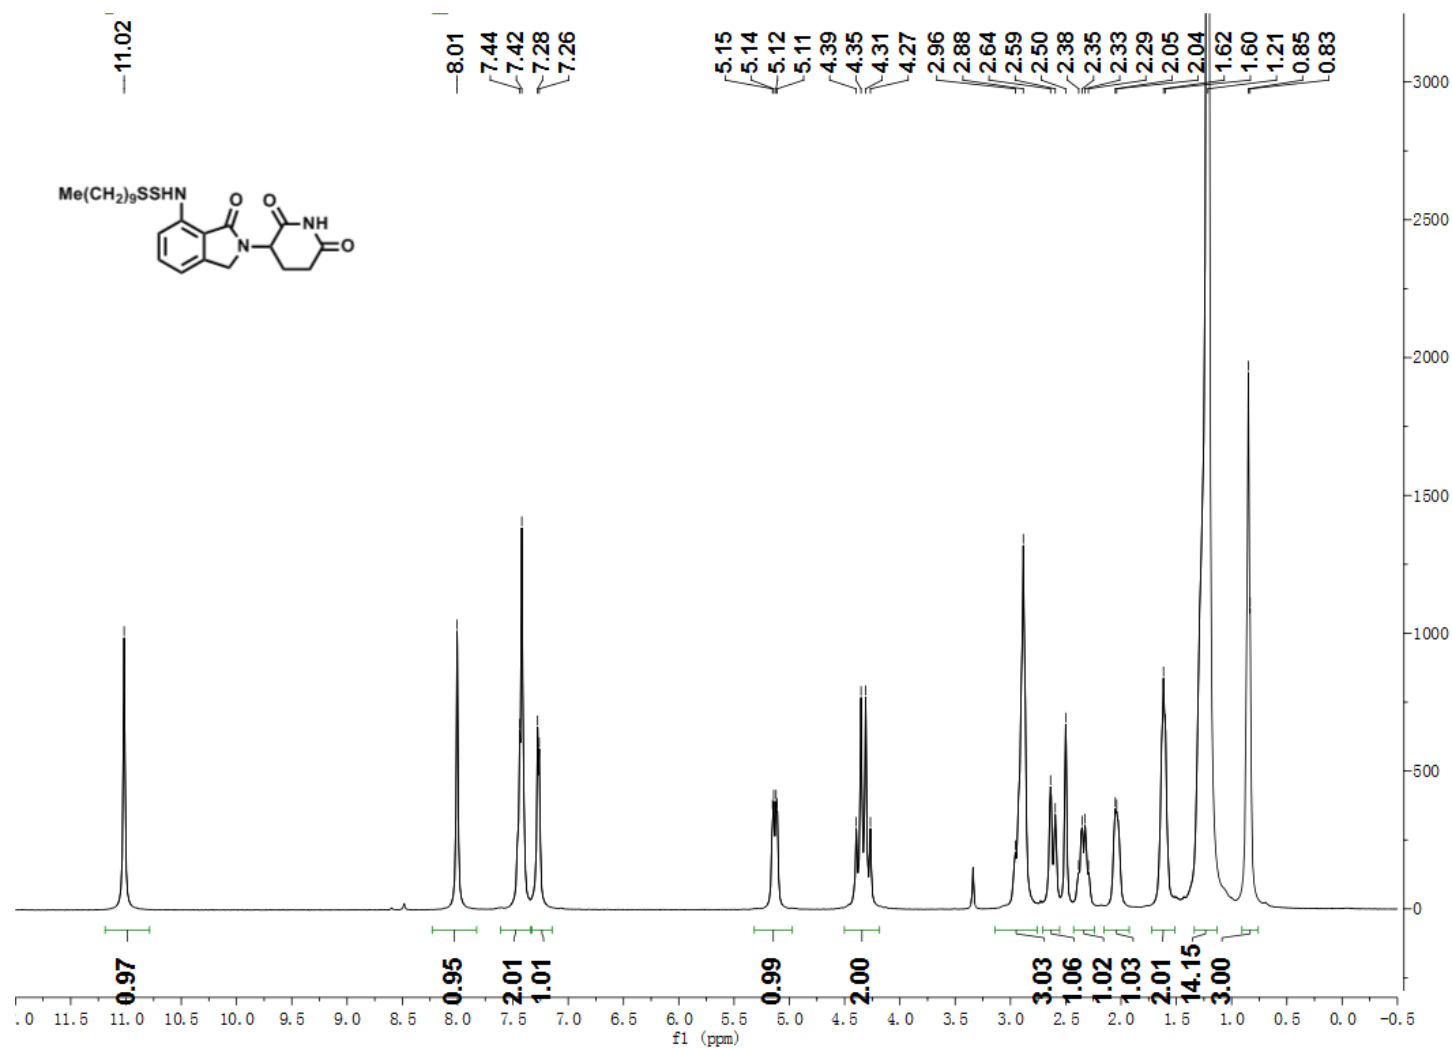

Supplementary Figure 166. <sup>1</sup>H NMR spectra for Compound 6t.

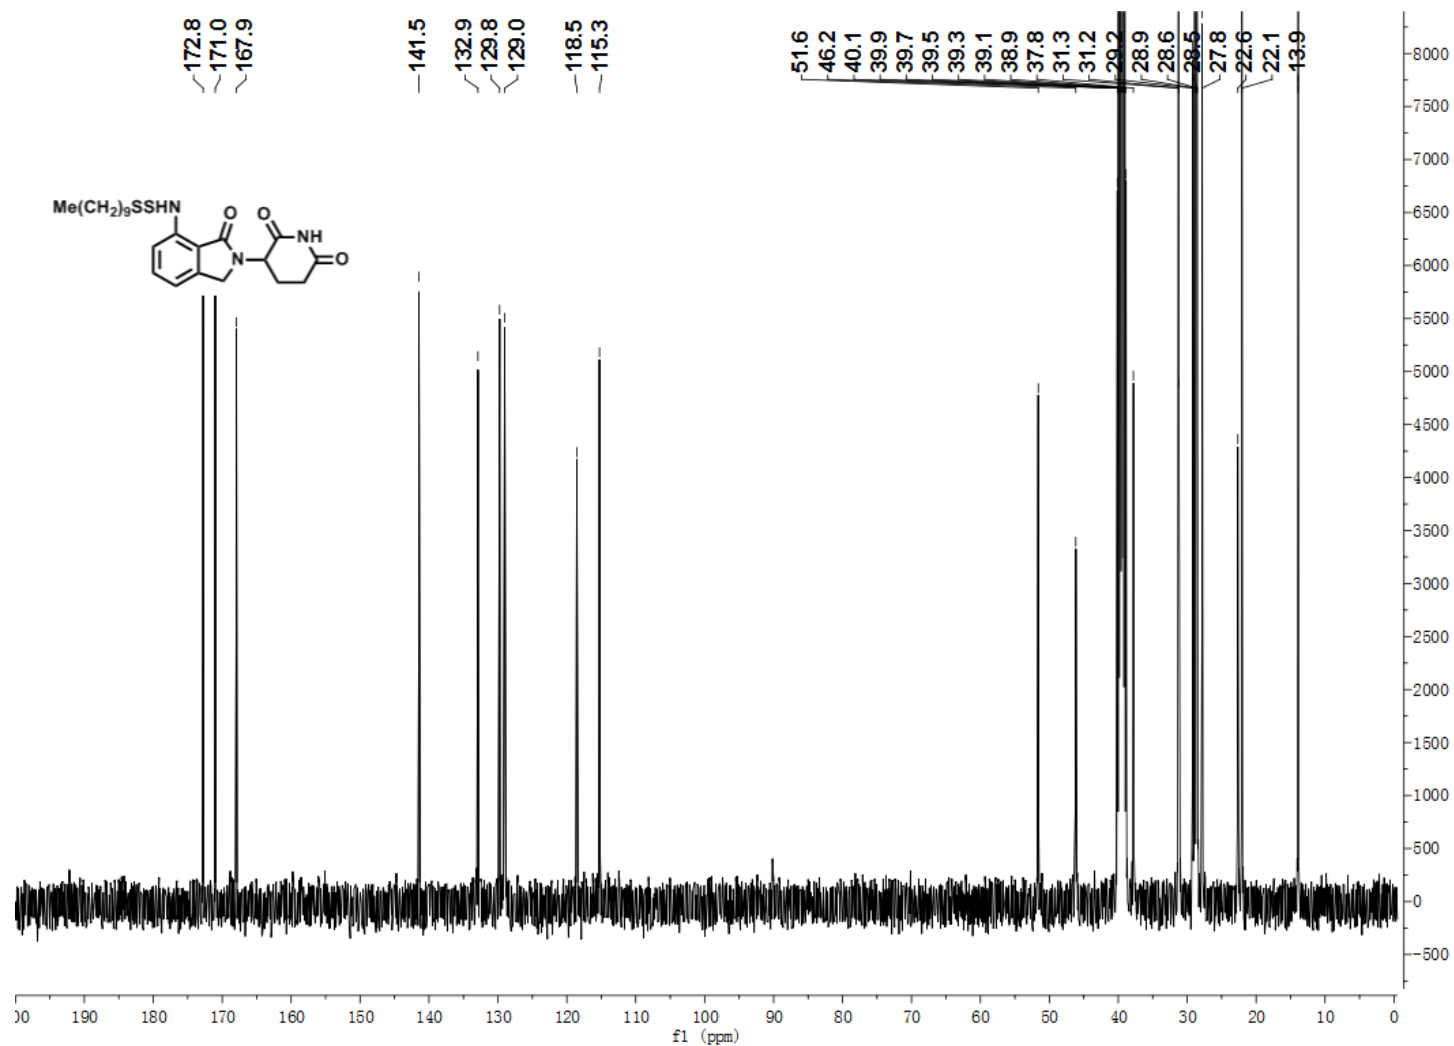

**Supplementary Figure 167.** <sup>13</sup>C NMR spectra for Compound **6t**.

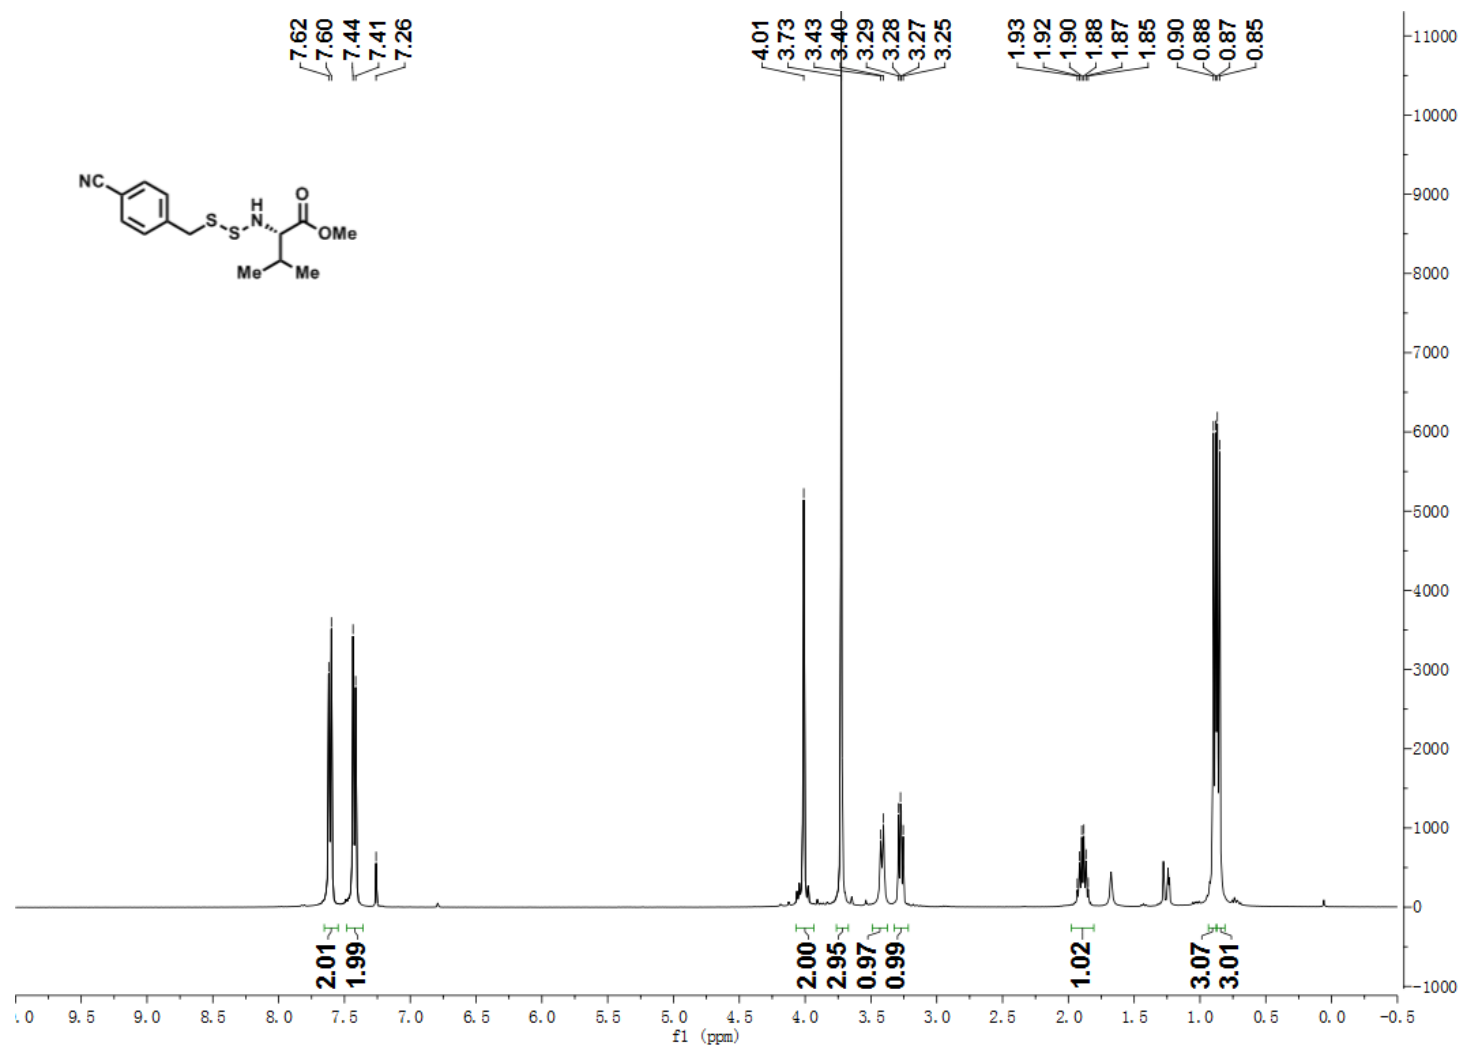

Supplementary Figure 168. <sup>1</sup>H NMR spectra for Compound 6u.

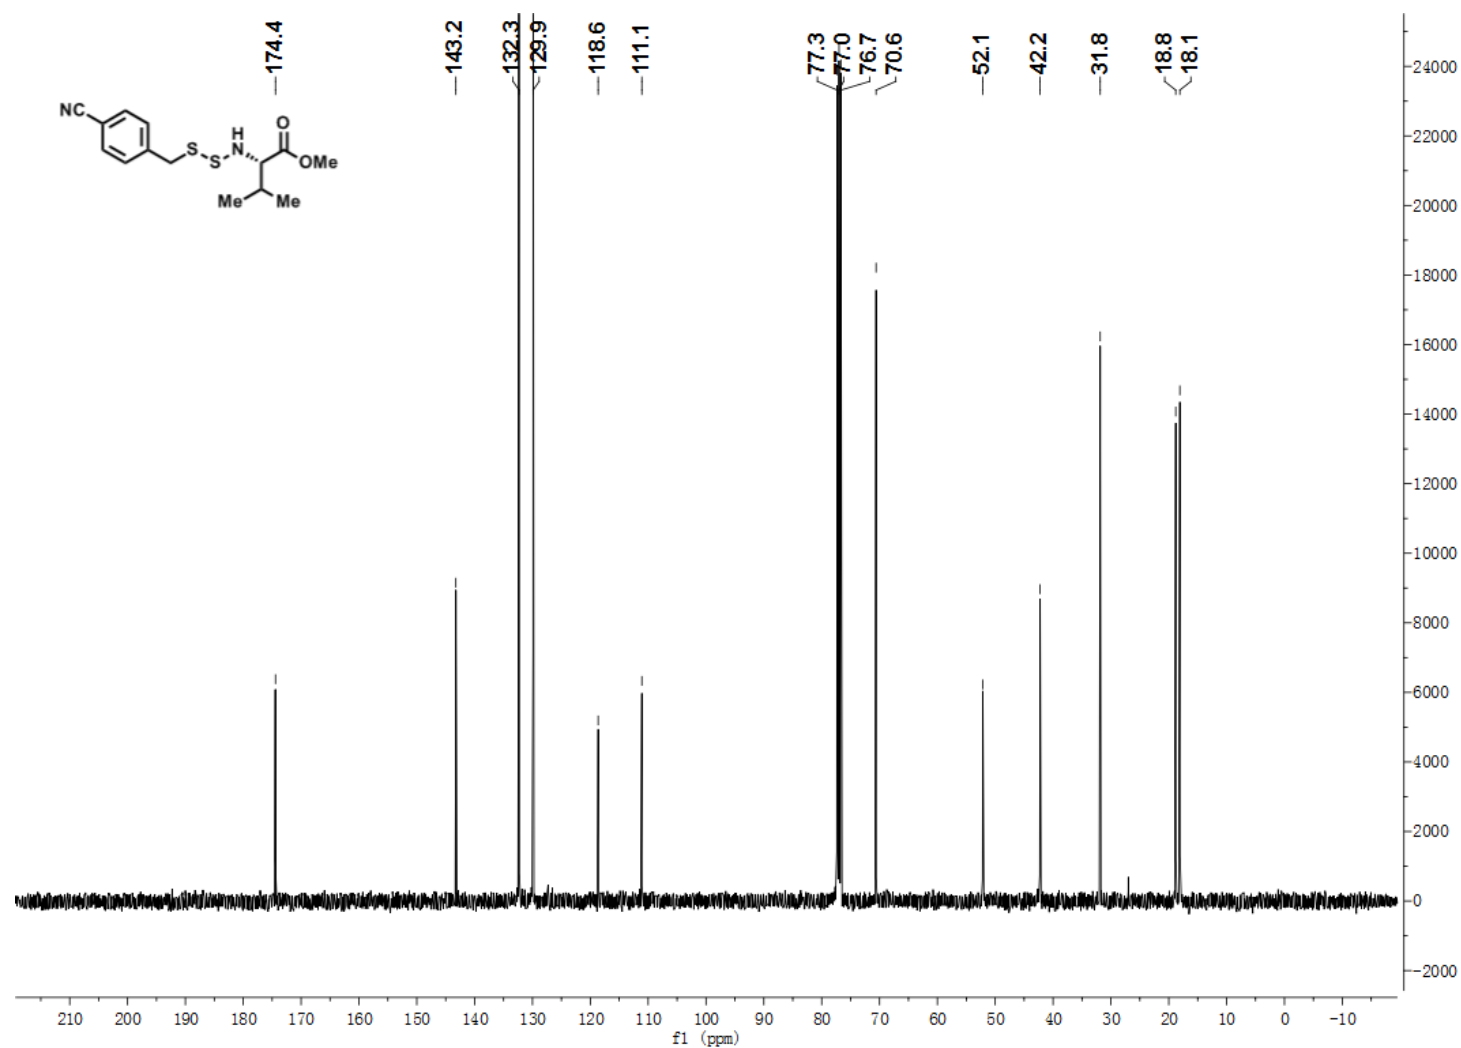

Supplementary Figure 169. <sup>13</sup>C NMR spectra for Compound 6u.

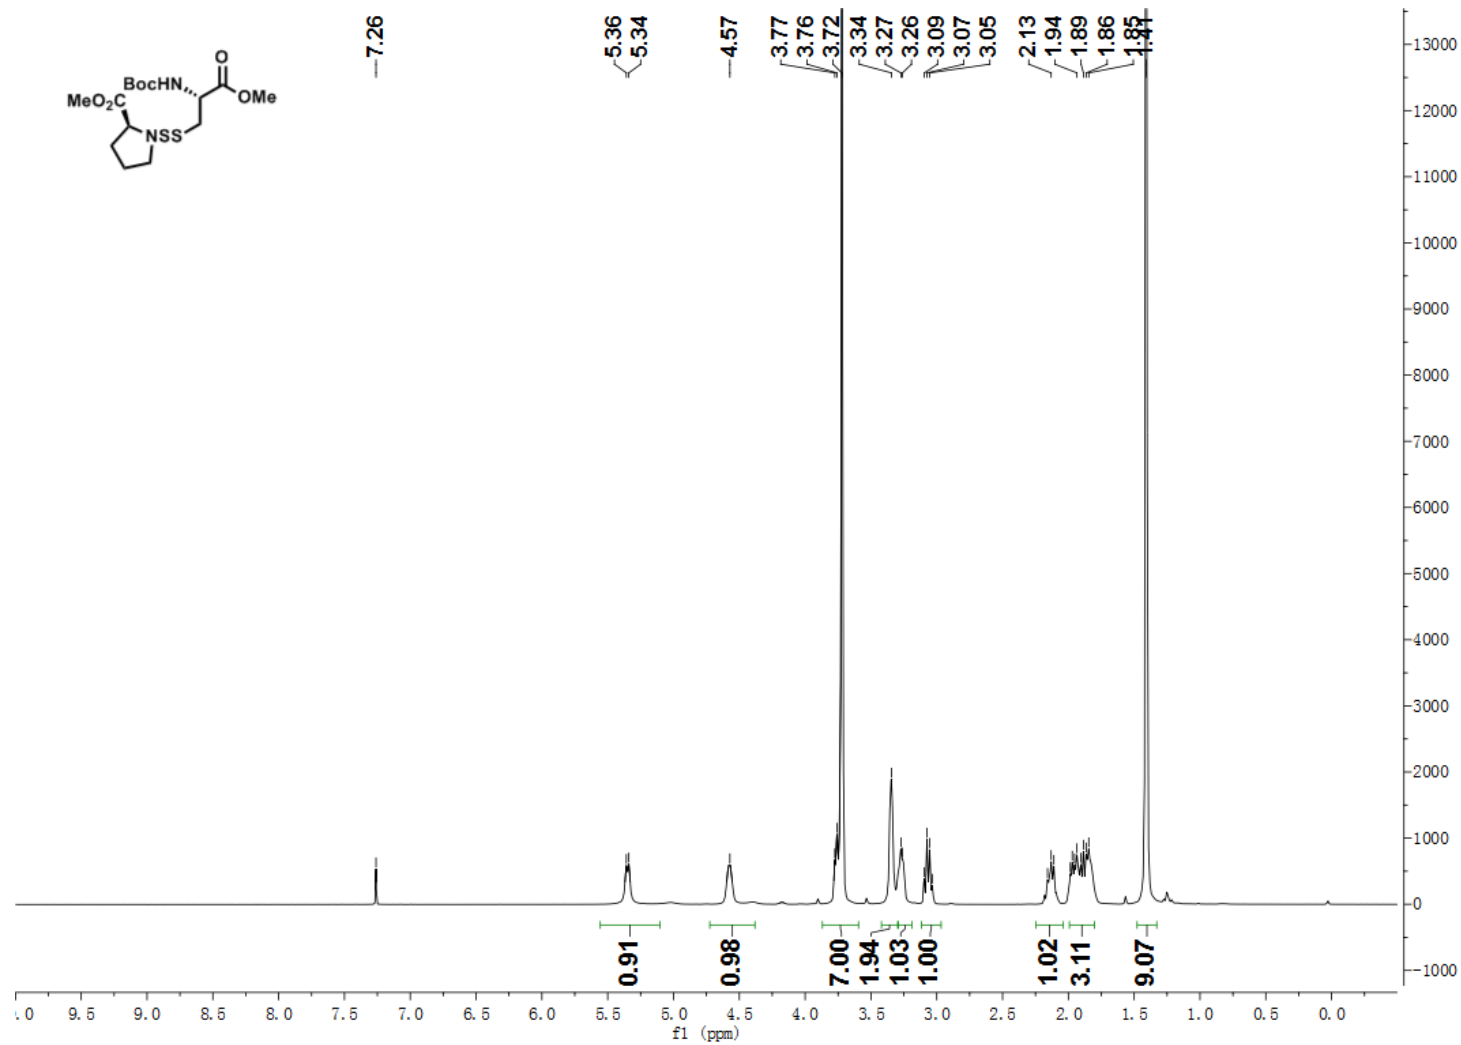

Supplementary Figure 170. <sup>1</sup>H NMR spectra for Compound 6v.

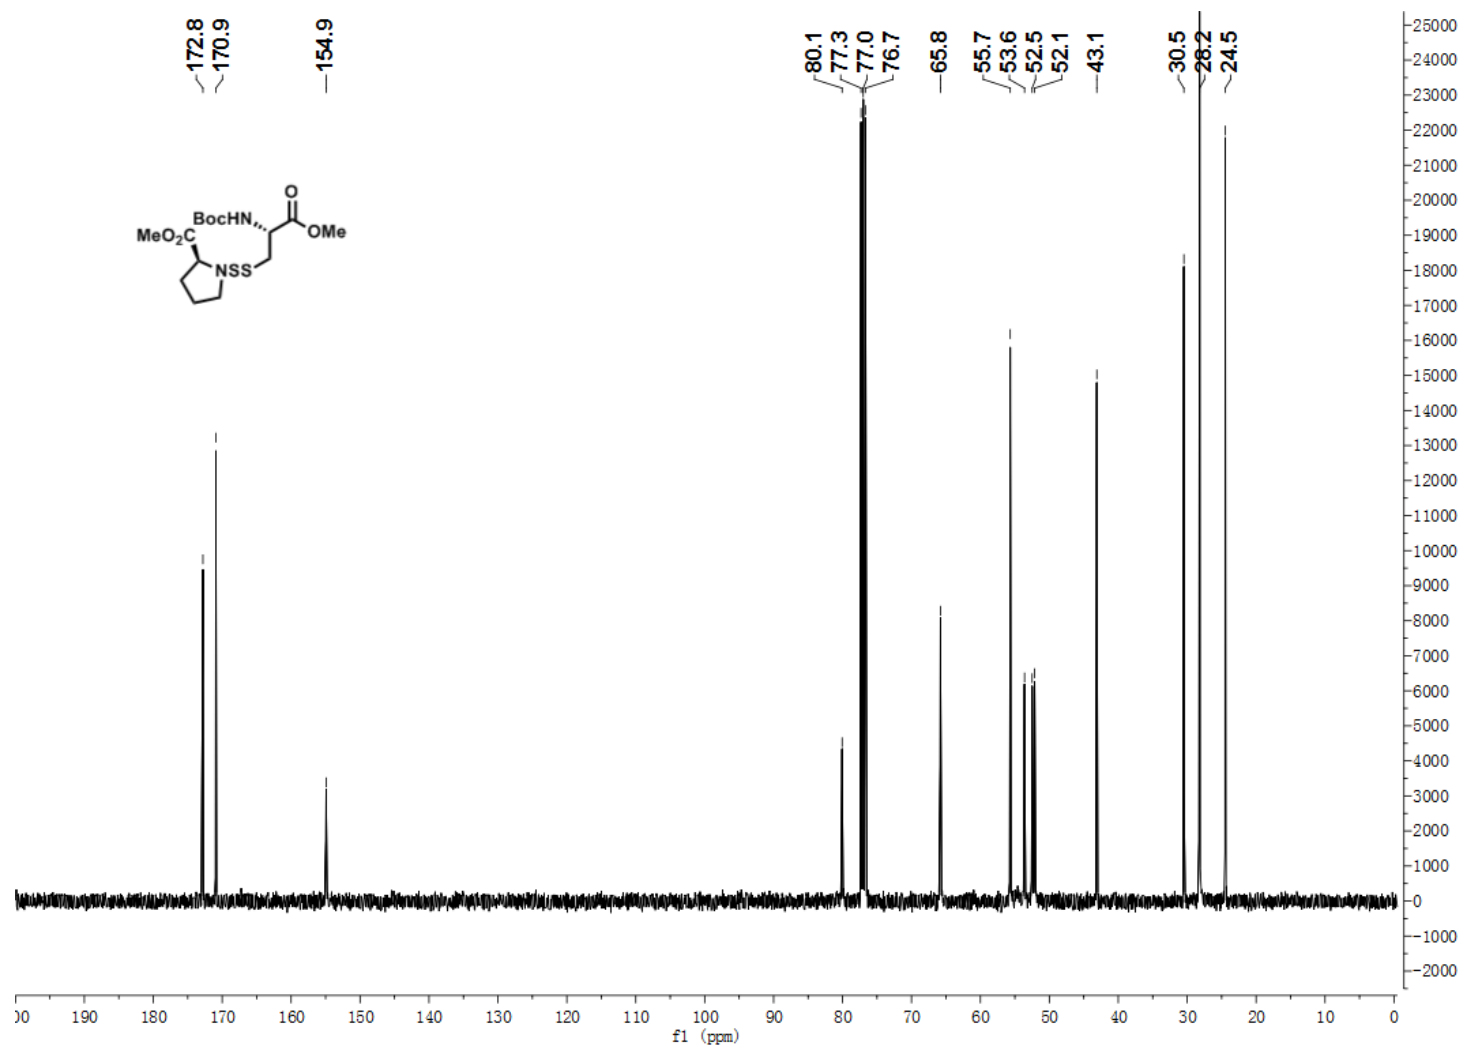

Supplementary Figure 171. <sup>13</sup>C NMR spectra for Compound 6v.

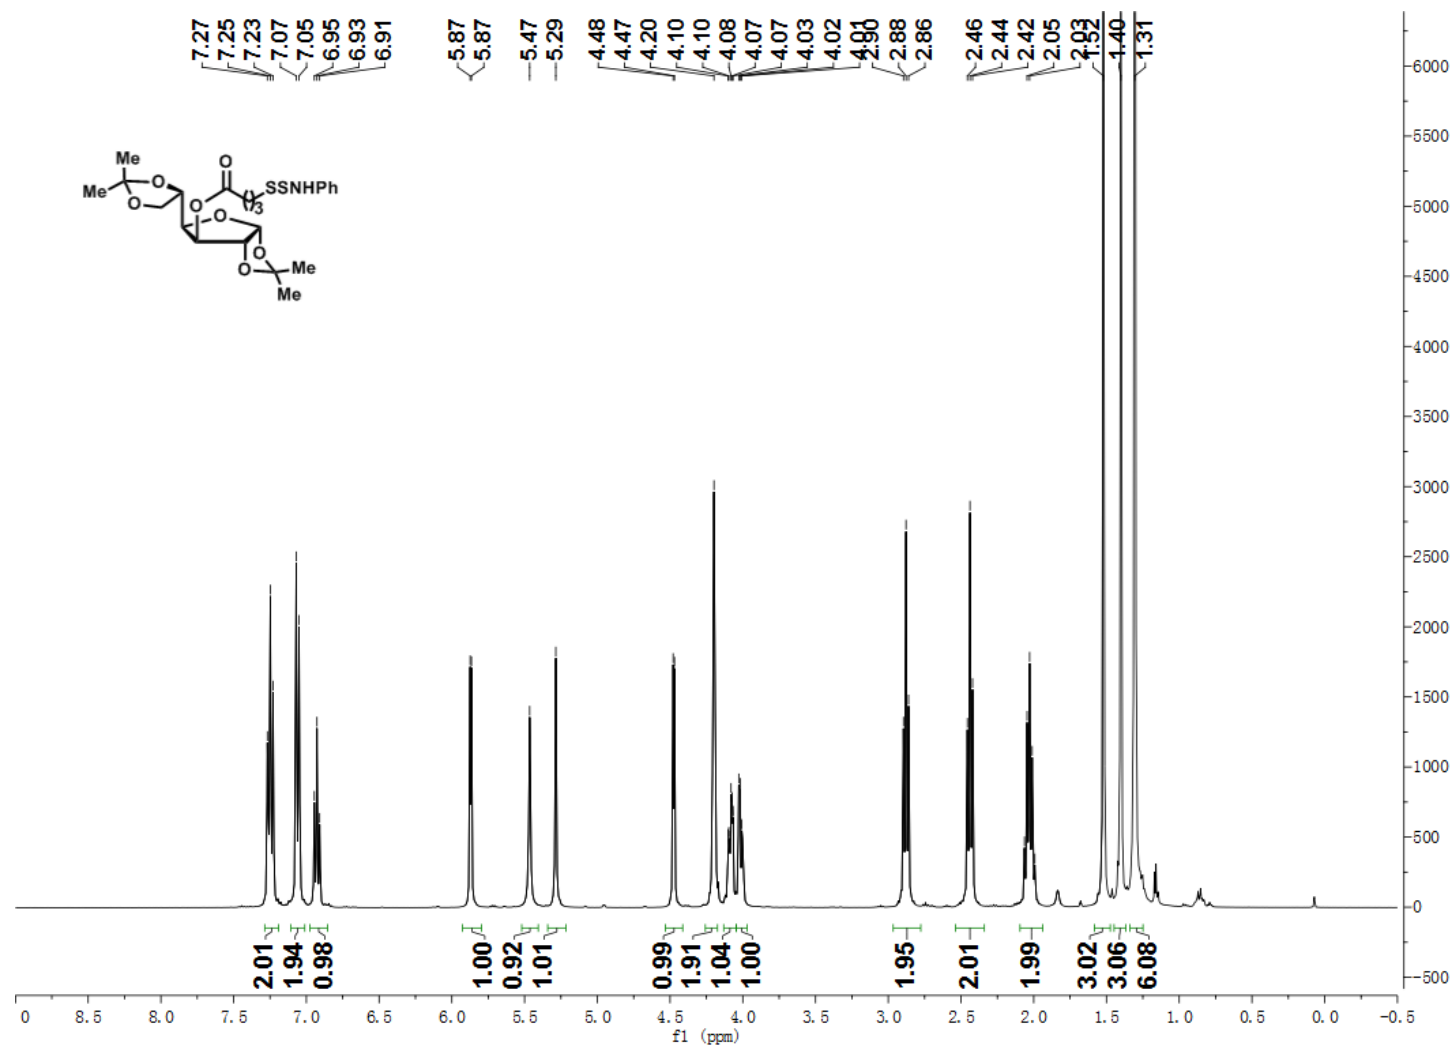

Supplementary Figure 172. <sup>1</sup>H NMR spectra for Compound 6w.

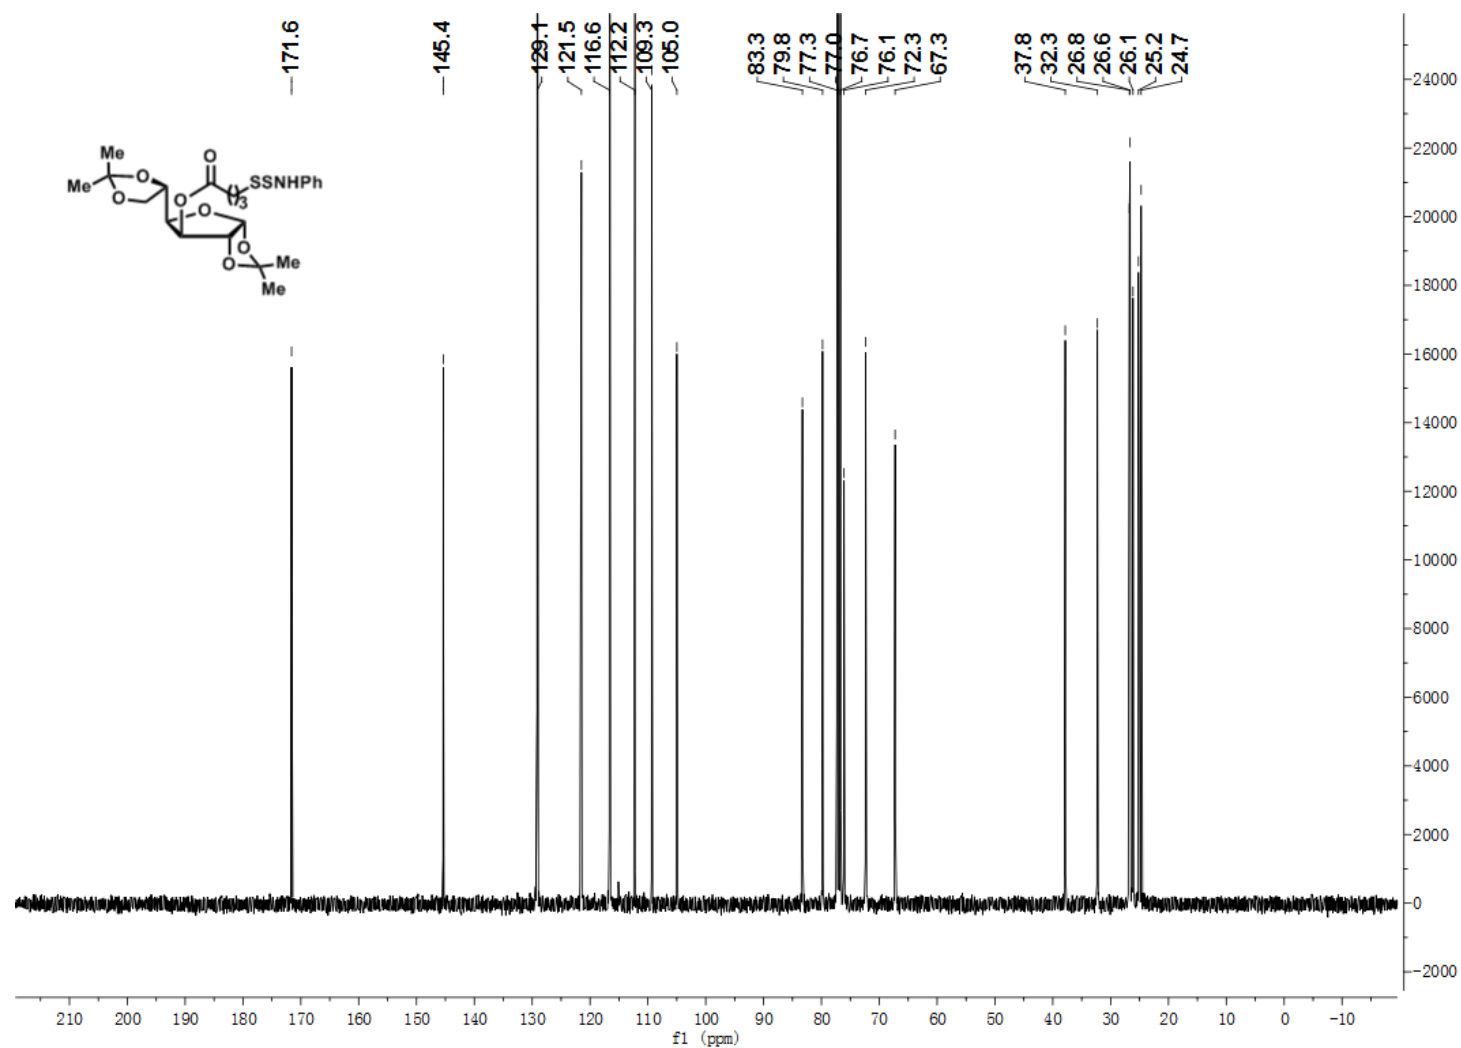

Supplementary Figure 173. <sup>13</sup>C NMR spectra for Compound 6w.

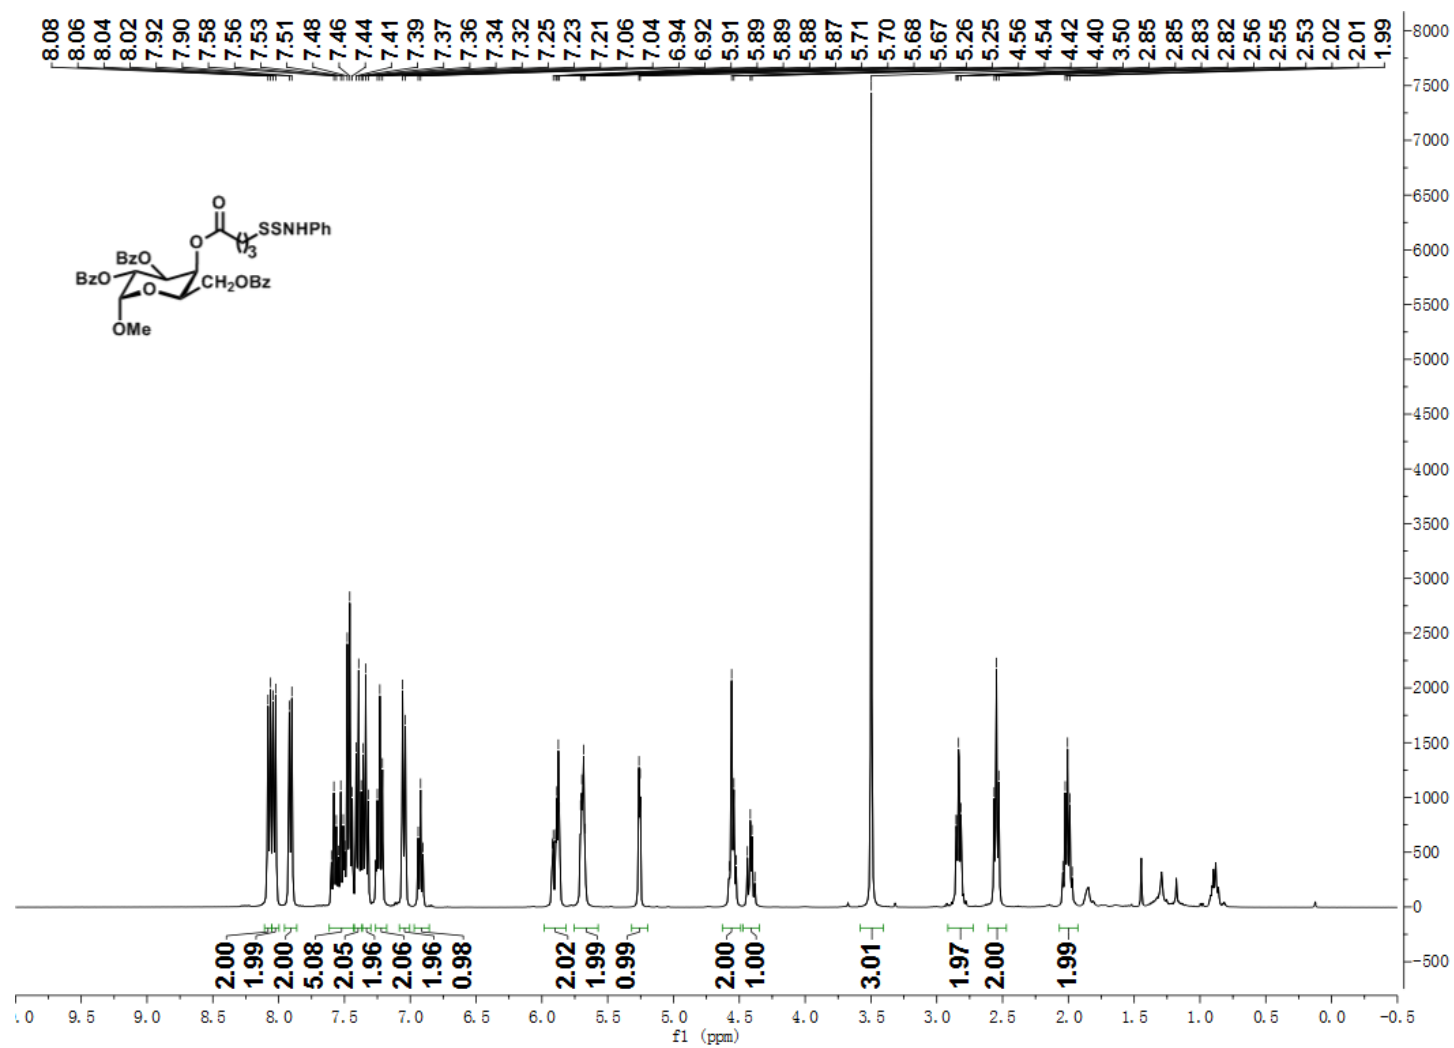

Supplementary Figure 174. <sup>1</sup>H NMR spectra for Compound 6x.

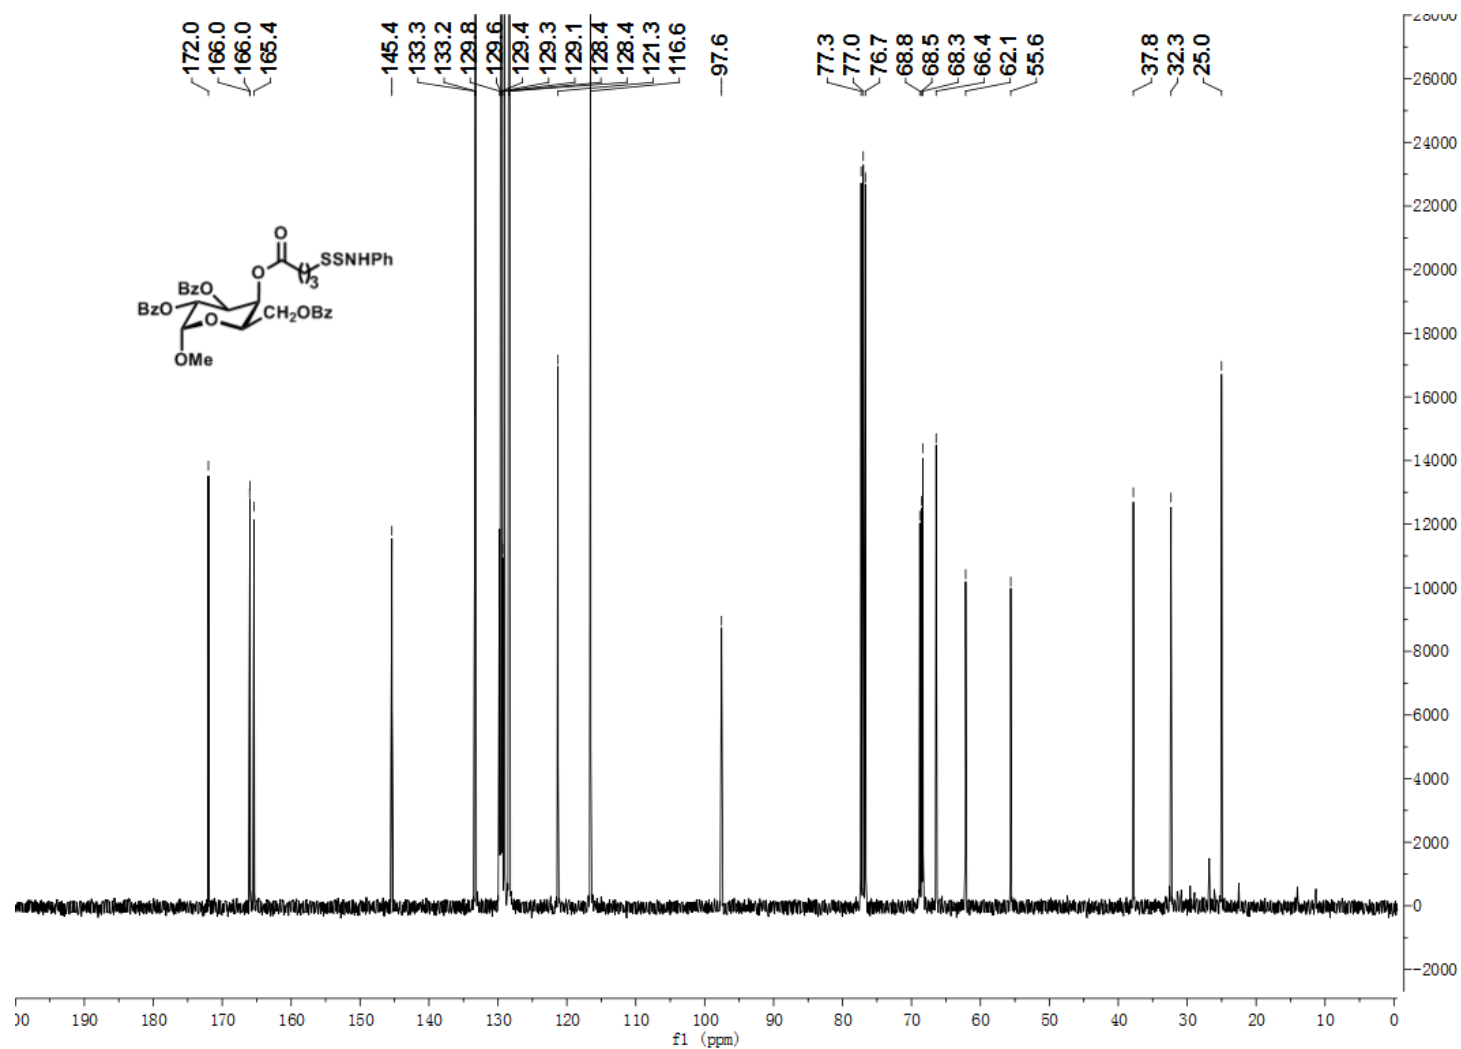

Supplementary Figure 175.  $^{13}\text{C}$  NMR spectra for Compound 6x.

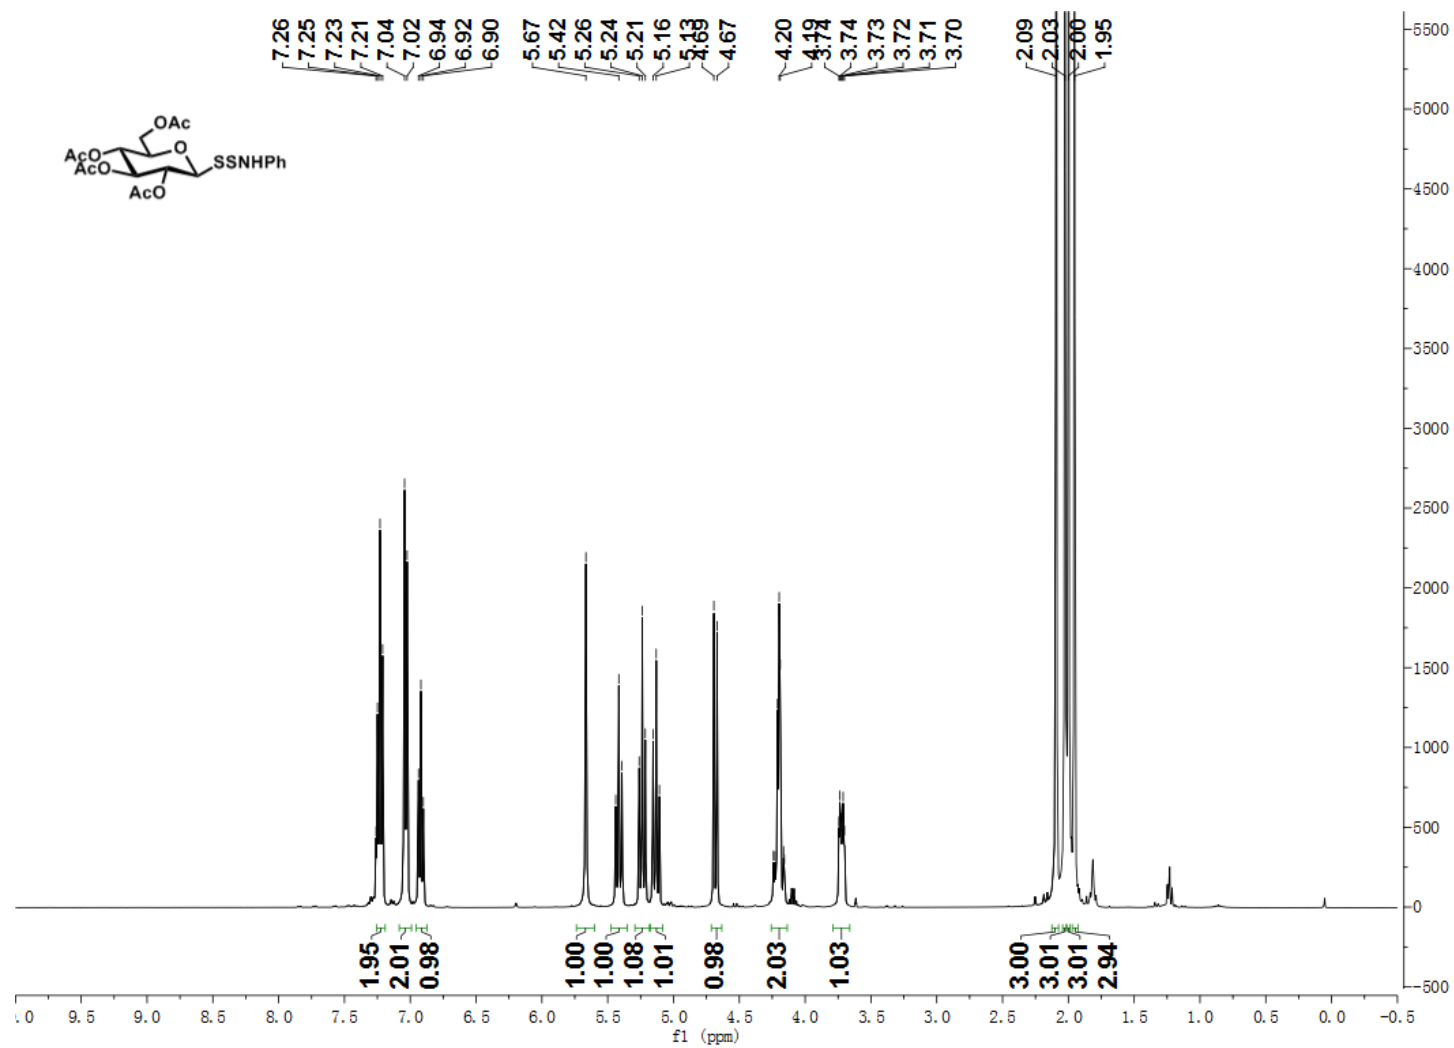

Supplementary Figure 176. <sup>1</sup>H NMR spectra for Compound 6y.

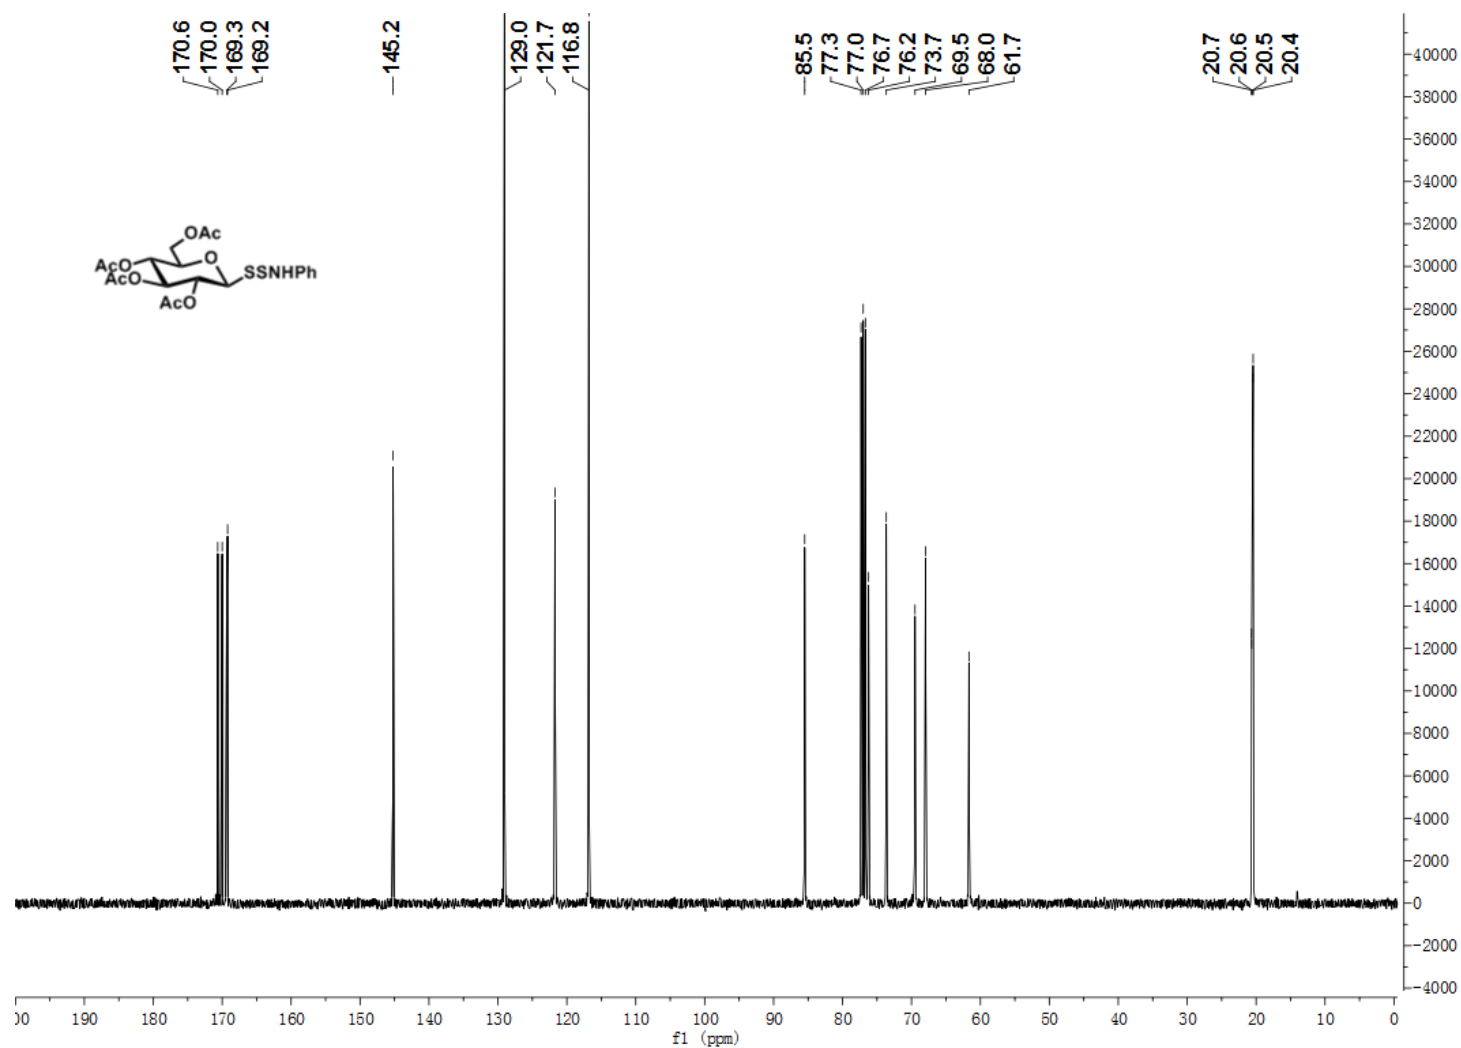

Supplementary Figure 177.  $^{13}\text{C}$  NMR spectra for Compound 6y.

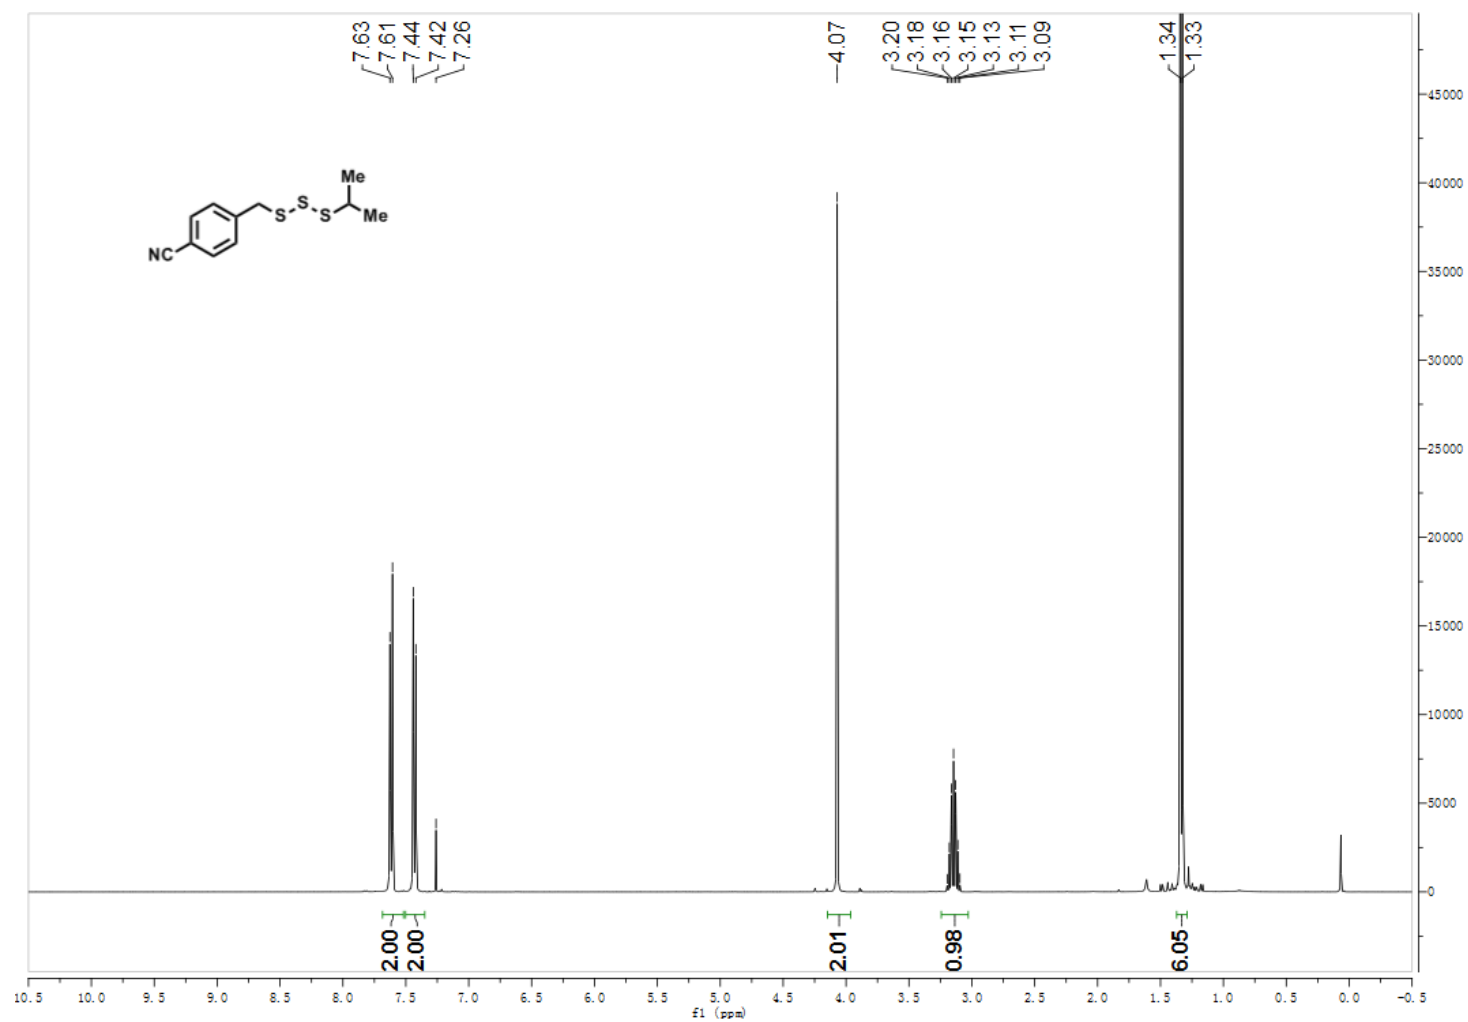

Supplementary Figure 178. <sup>1</sup>H NMR spectra for Compound 7a.

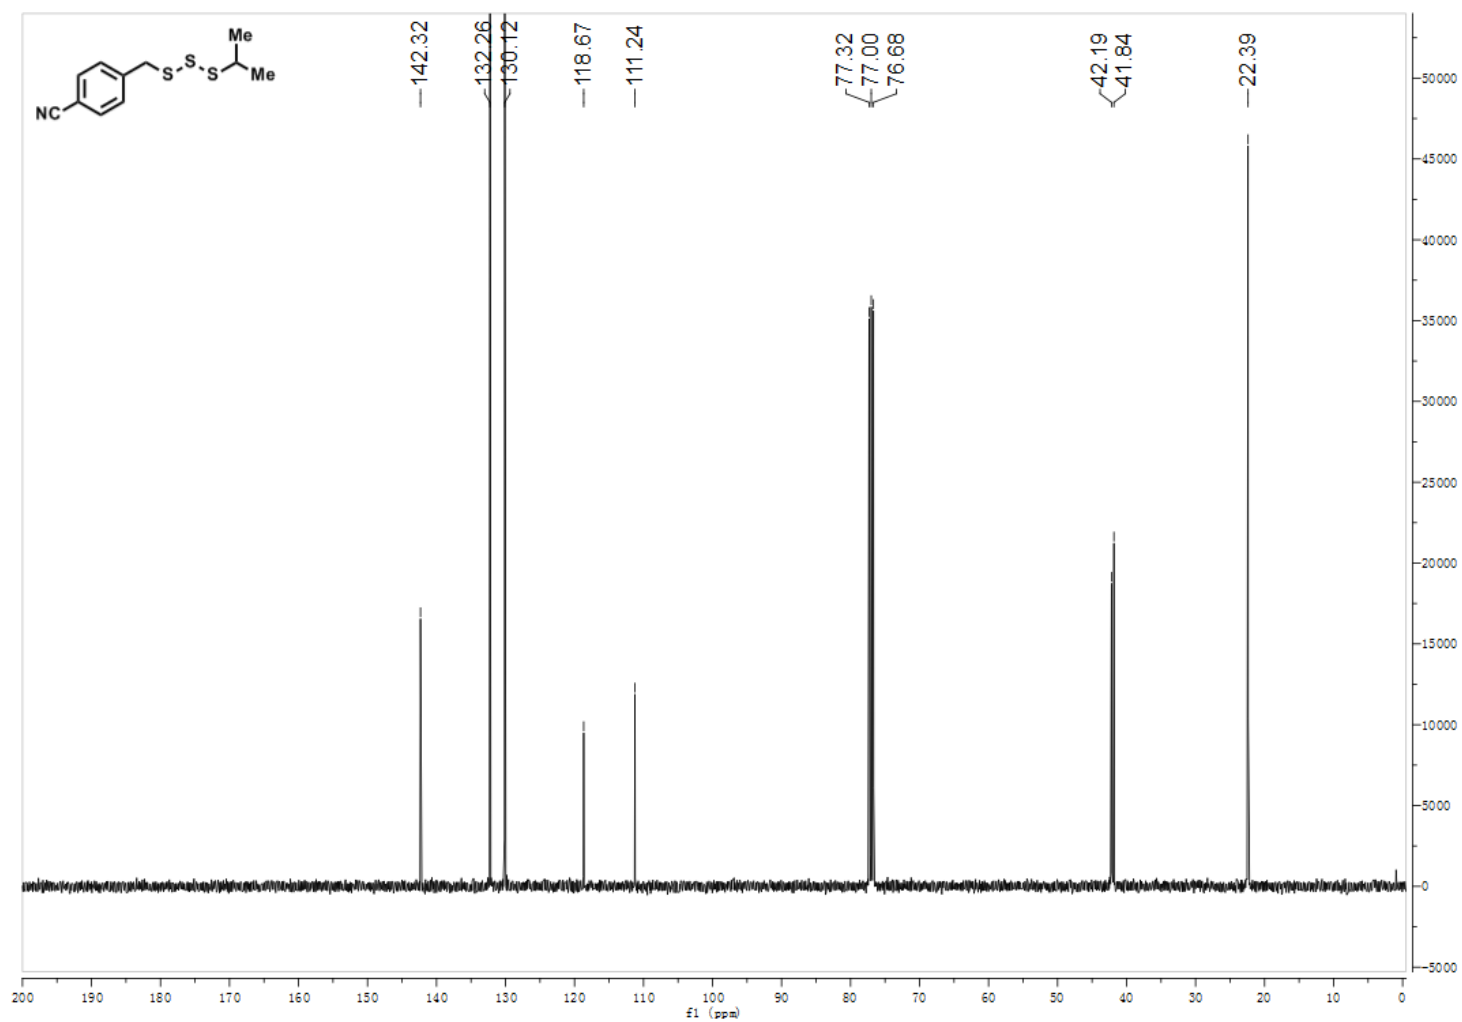

Supplementary Figure 179. <sup>13</sup>C NMR spectra for Compound 7a.

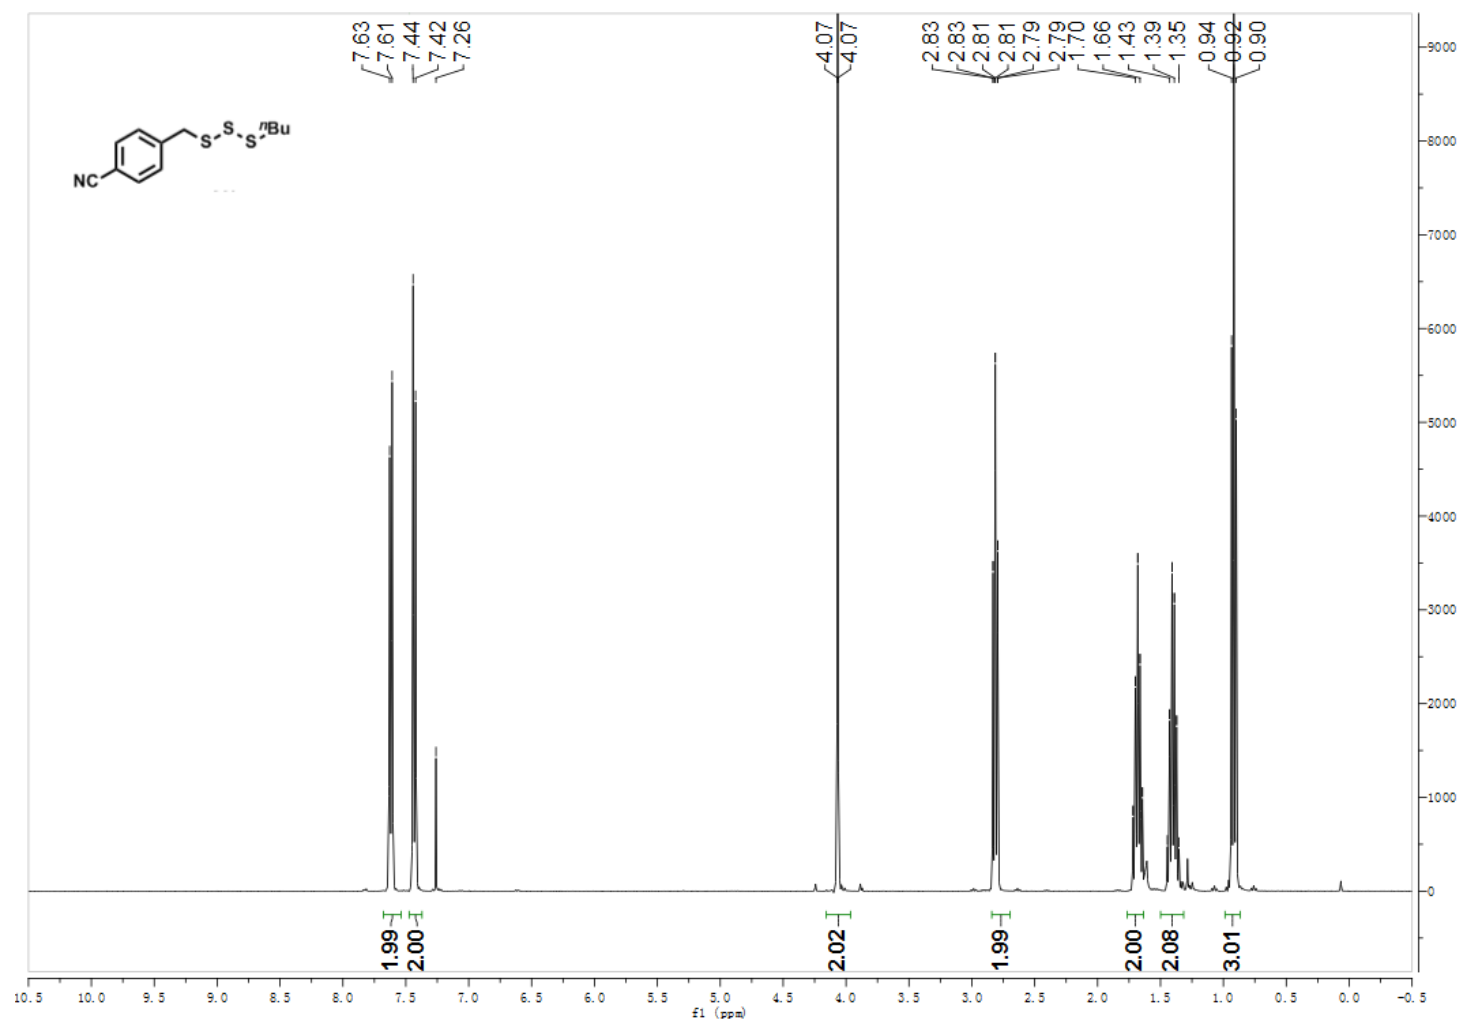

Supplementary Figure 180. <sup>1</sup>H NMR spectra for Compound 7b.

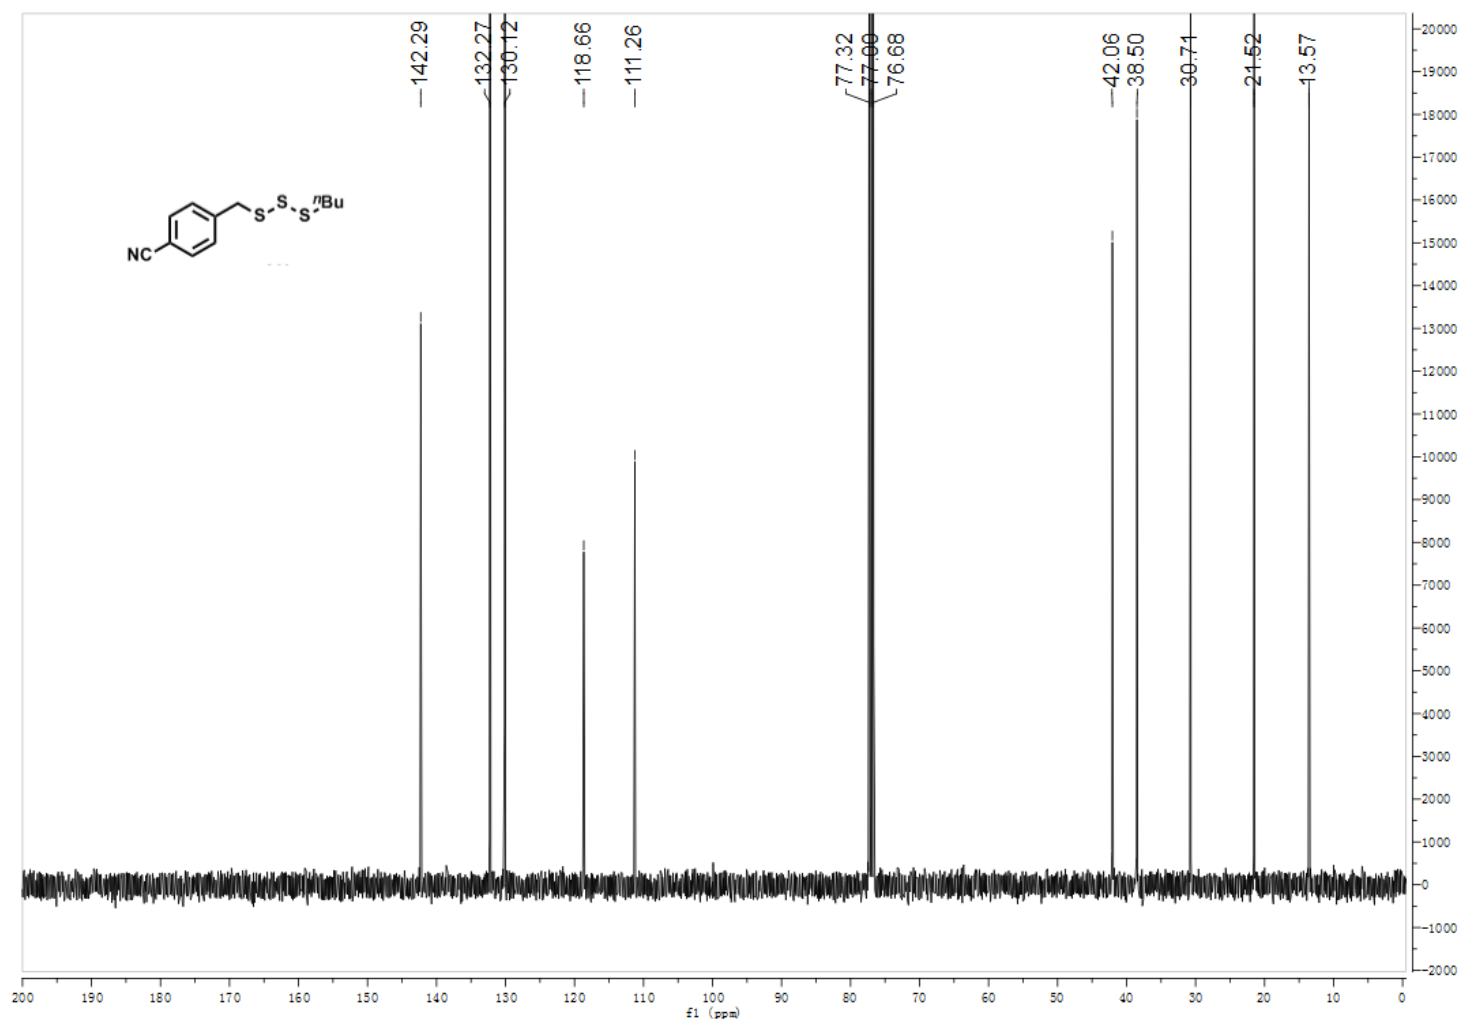

Supplementary Figure 181. <sup>13</sup>C NMR spectra for Compound 7b.

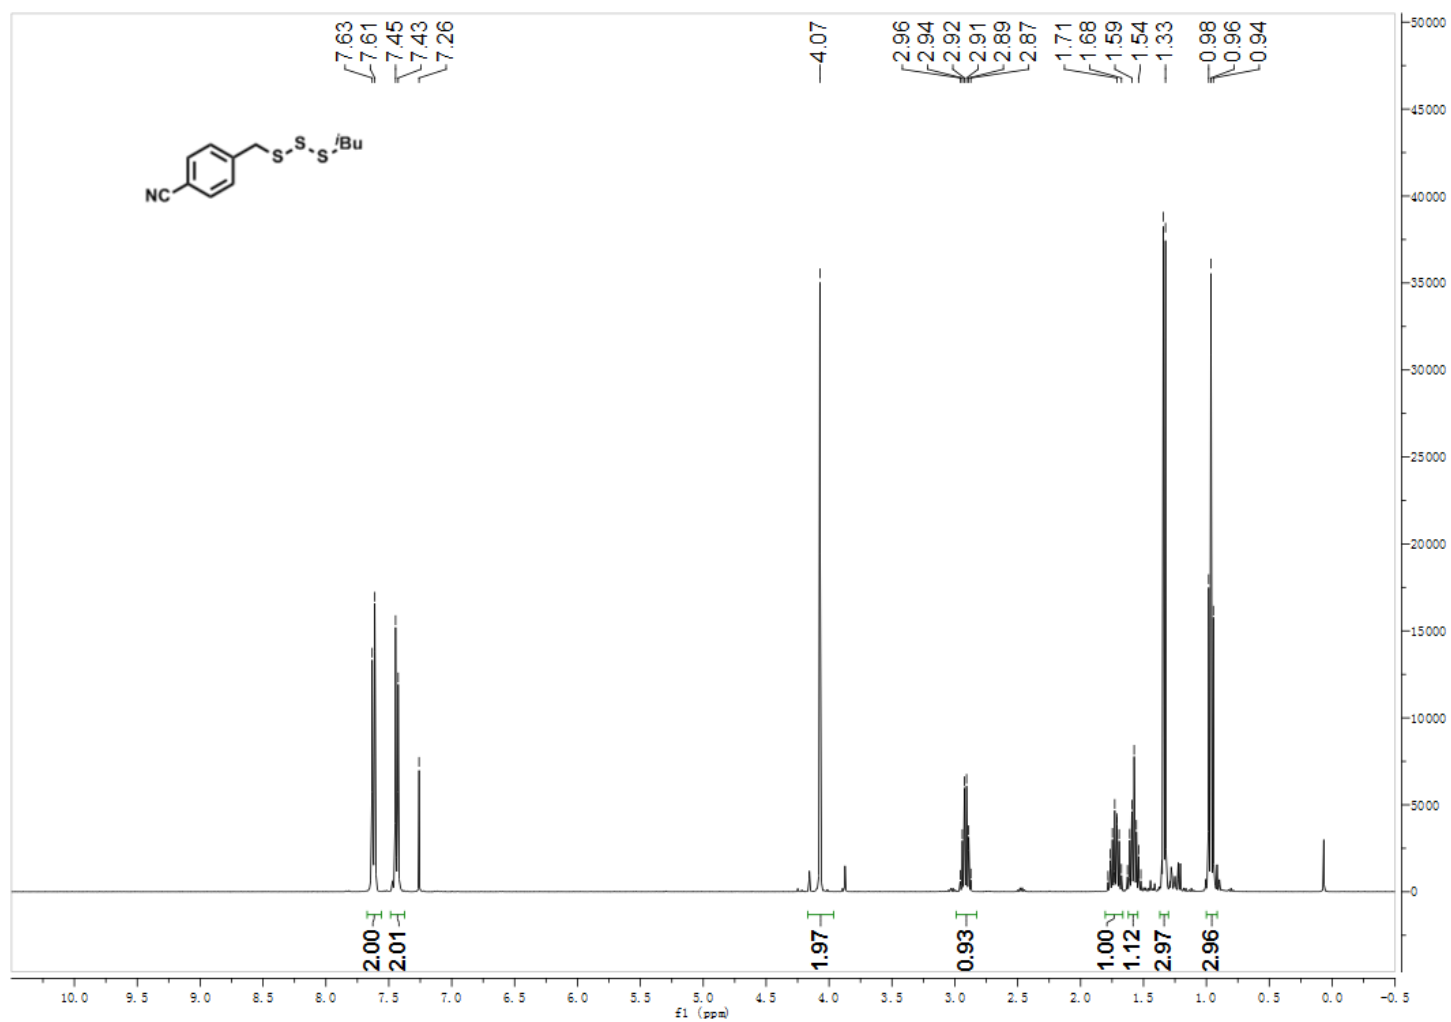

Supplementary Figure 182. <sup>1</sup>H NMR spectra for Compound 7c.

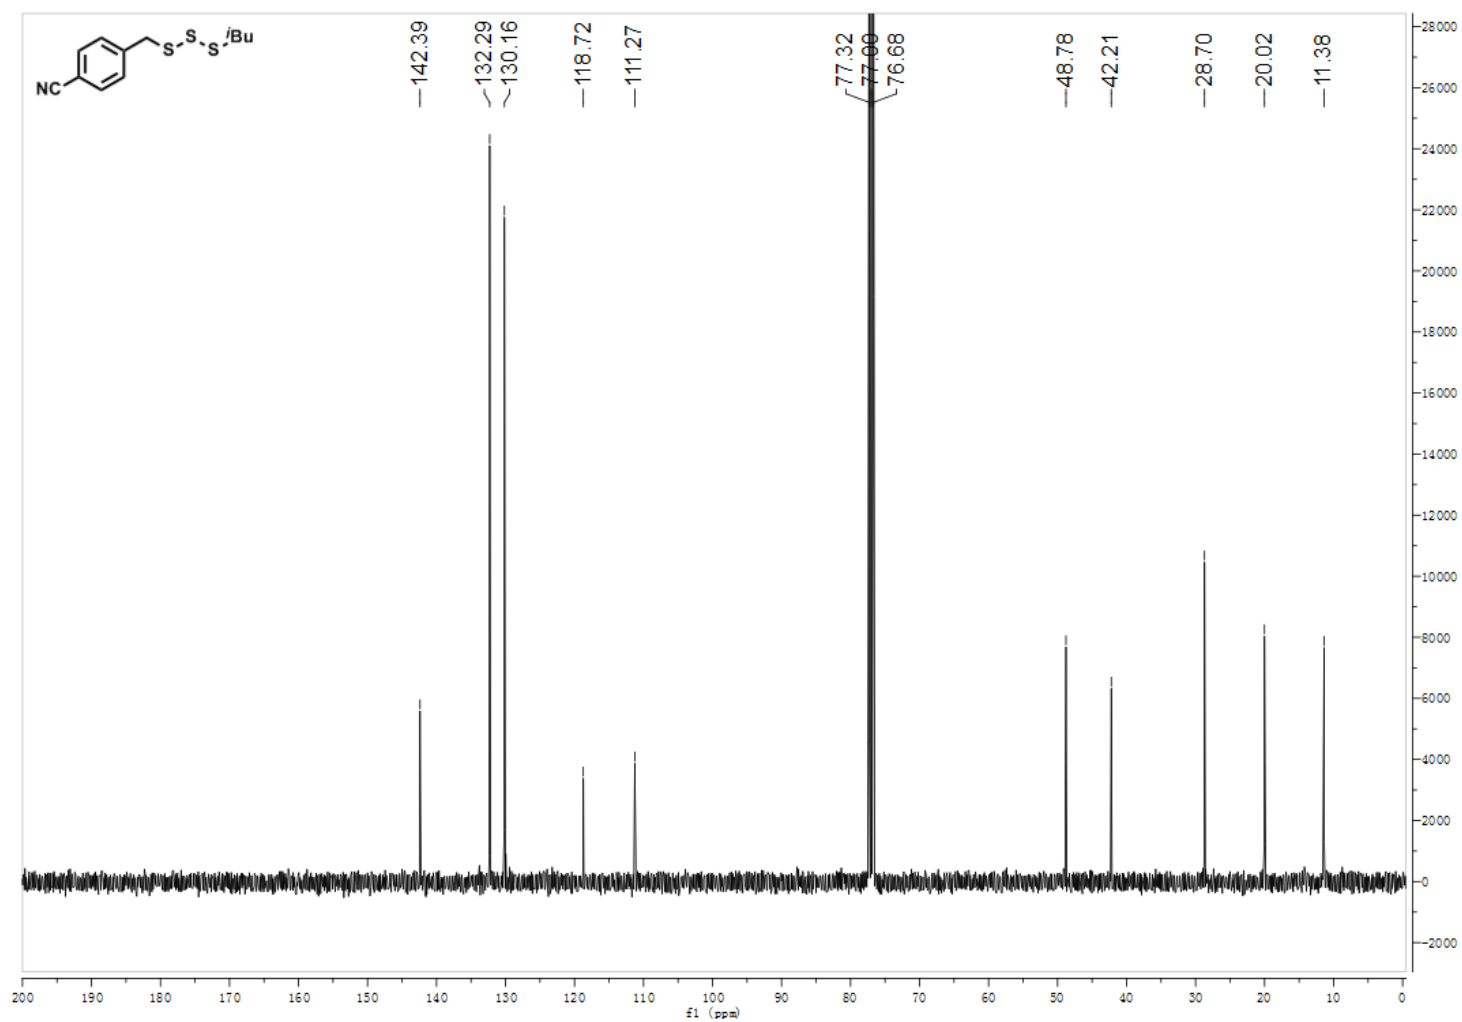

**Supplementary Figure 183.** <sup>13</sup>C NMR spectra for Compound **7c**.

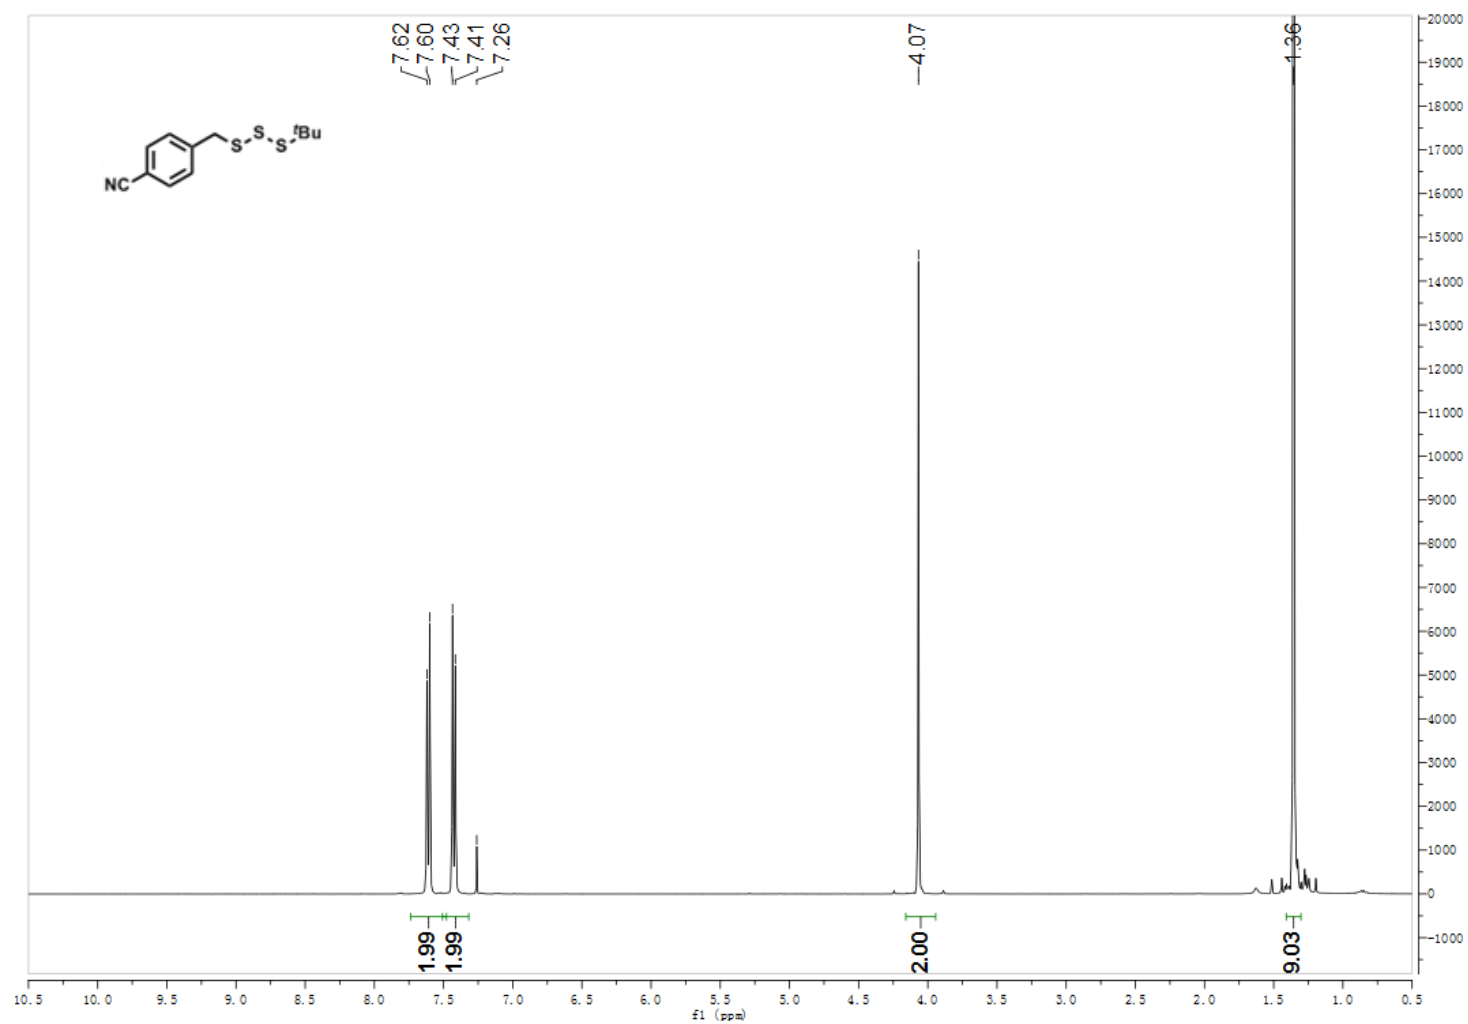

**Supplementary Figure 184.** <sup>1</sup>H NMR spectra for Compound **7d**.

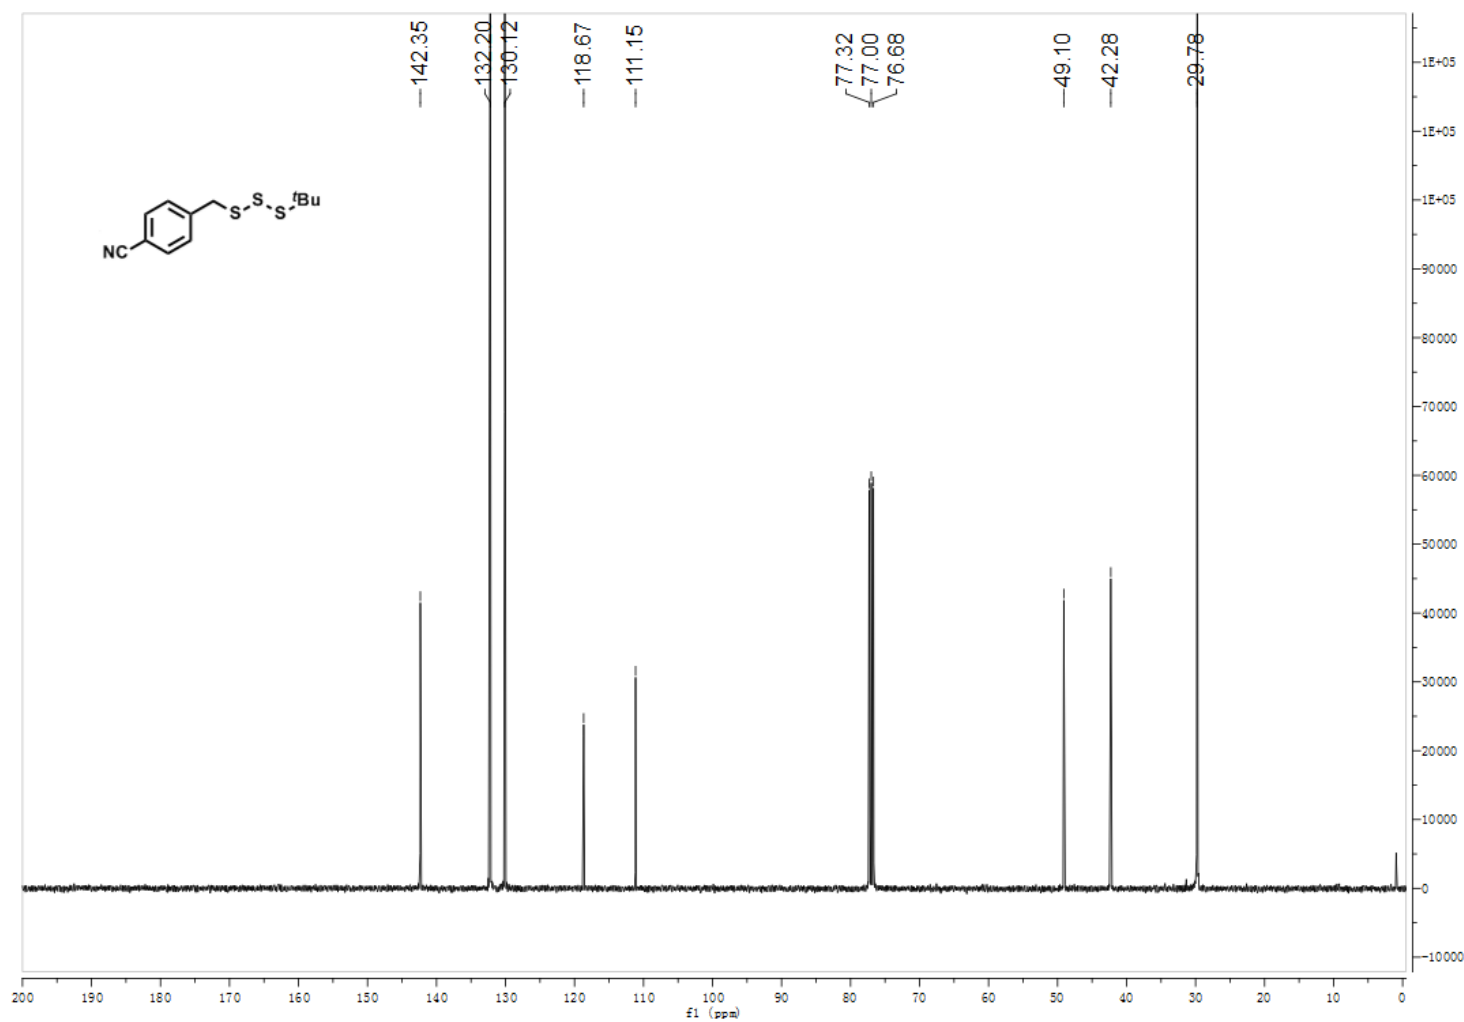

Supplementary Figure 185.  $^{13}\text{C}$  NMR spectra for Compound 7d.

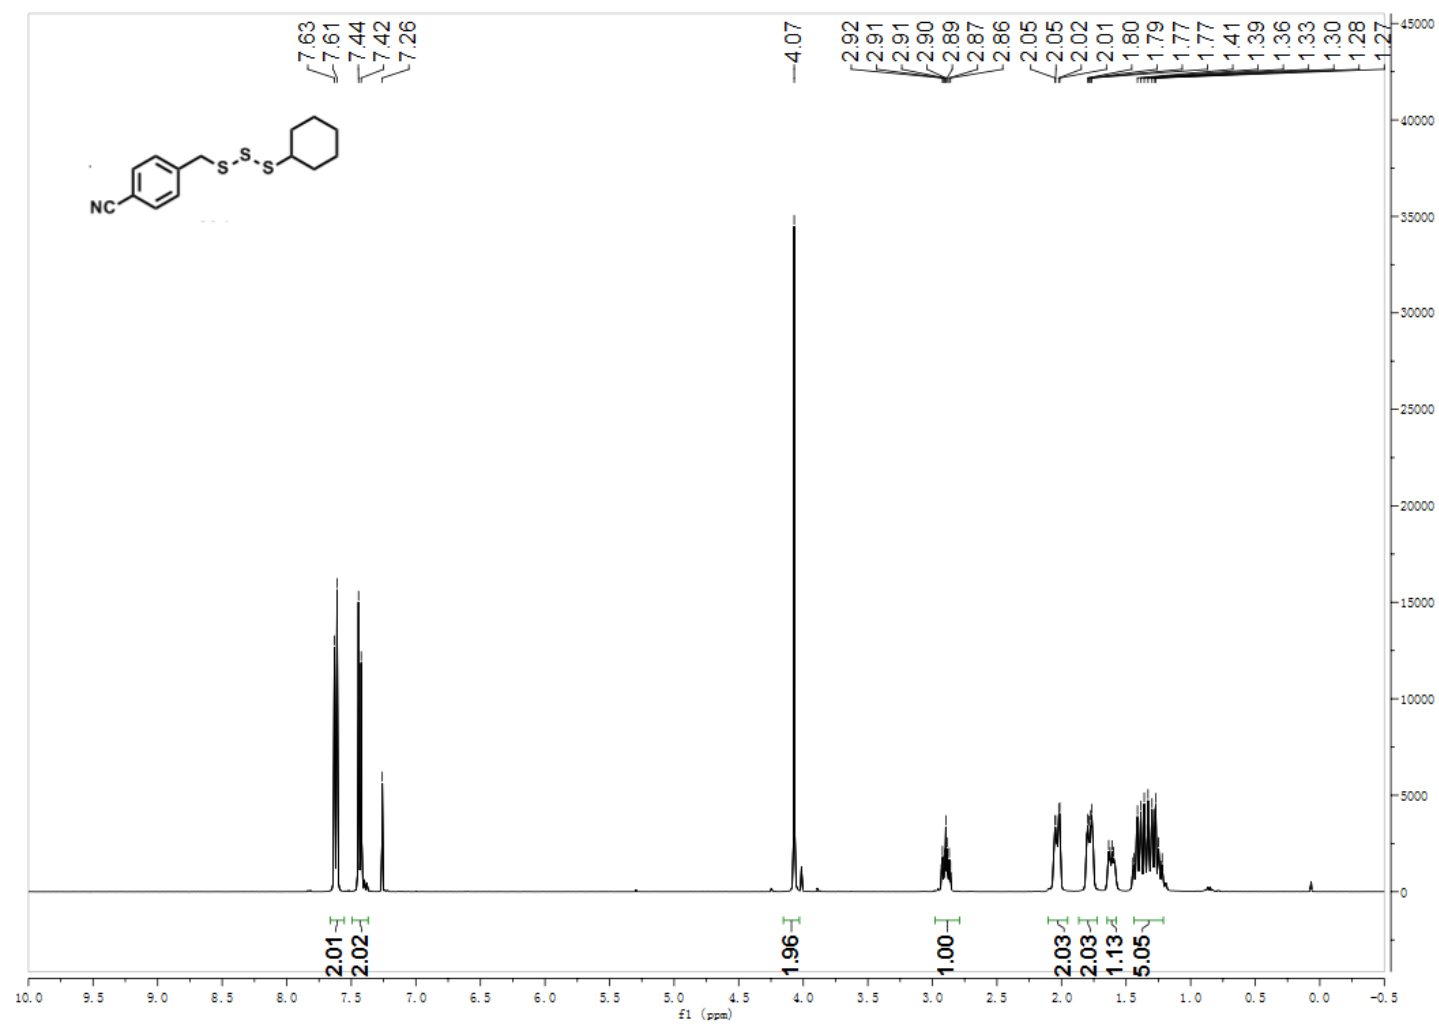

Supplementary Figure 186. <sup>1</sup>H NMR spectra for Compound 7e.

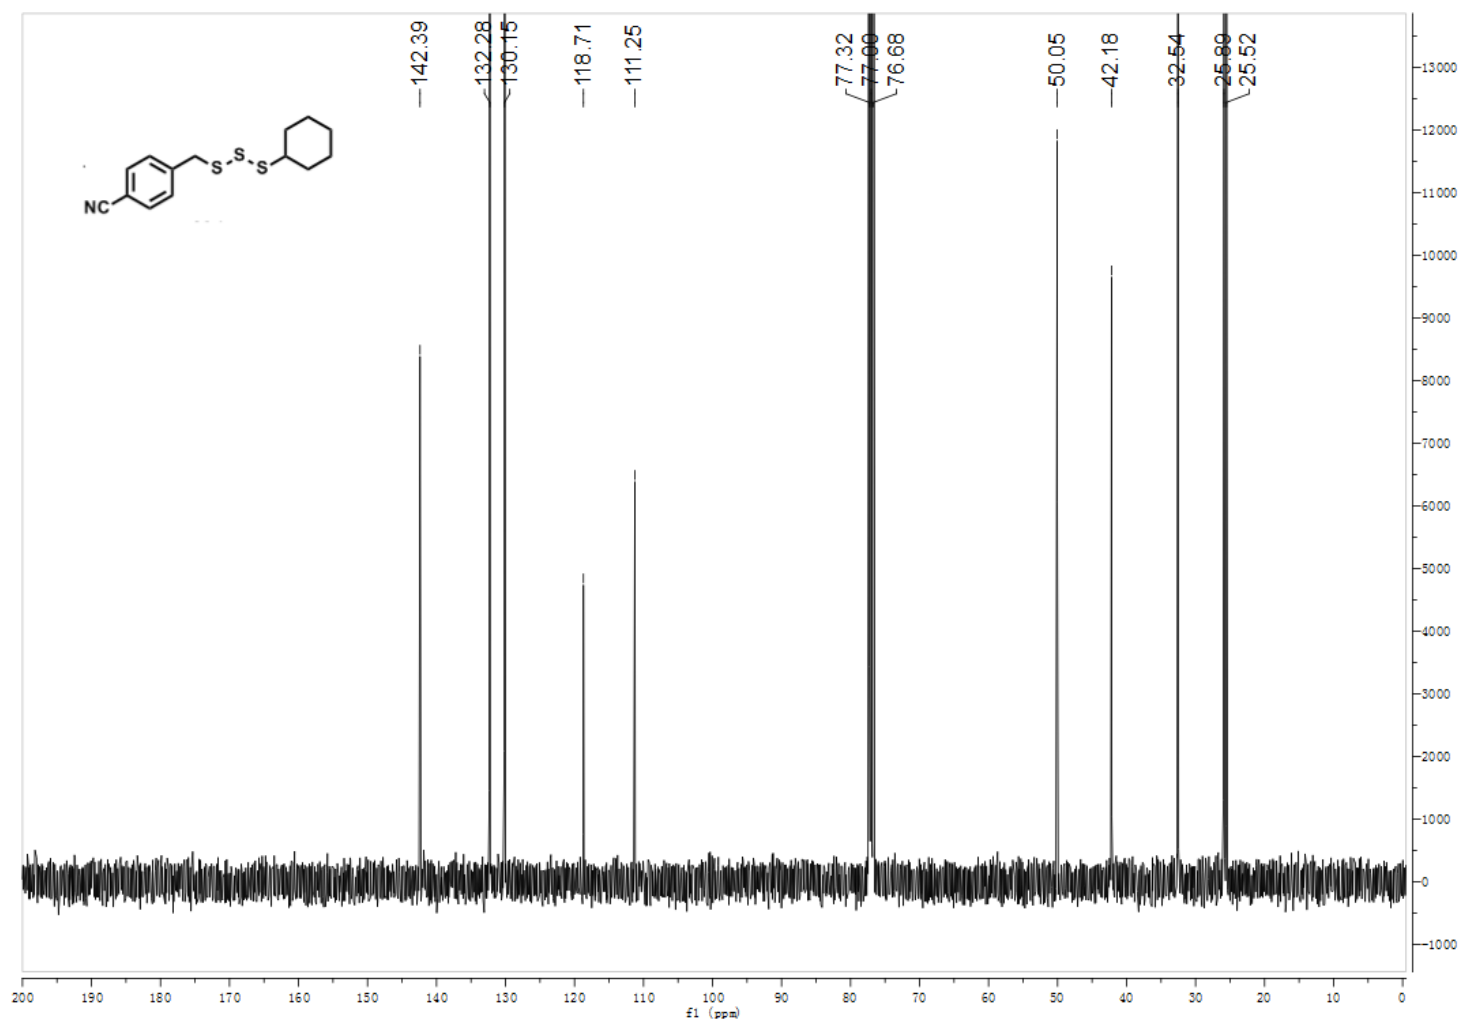

**Supplementary Figure 187.** <sup>13</sup>C NMR spectra for Compound 7e.

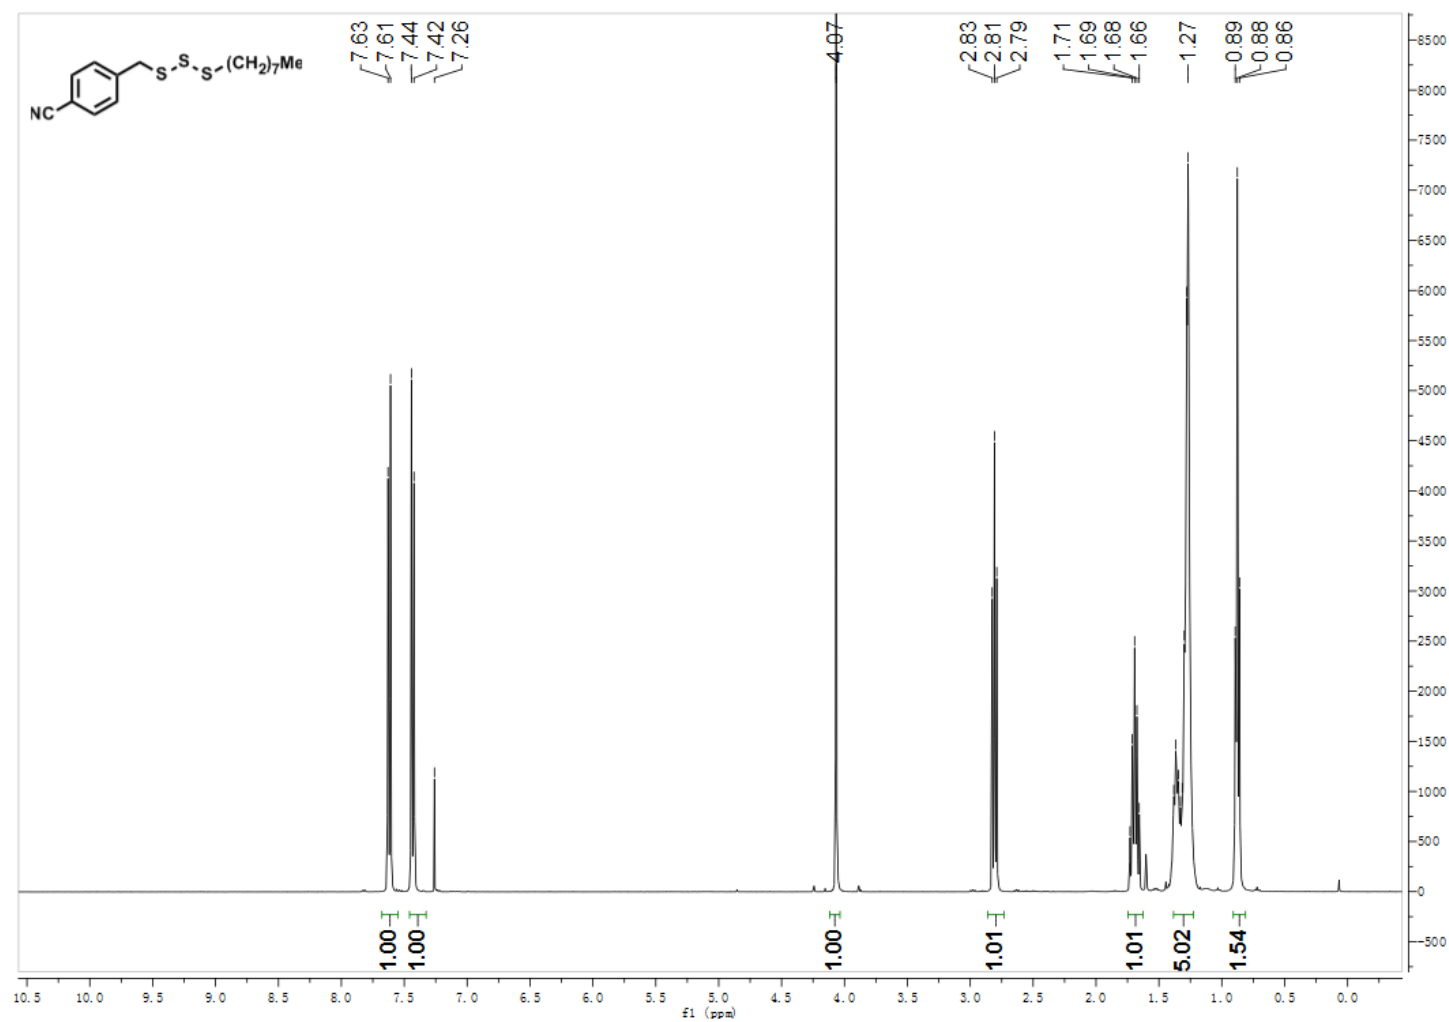

Supplementary Figure 188. <sup>1</sup>H NMR spectra for Compound 7f.

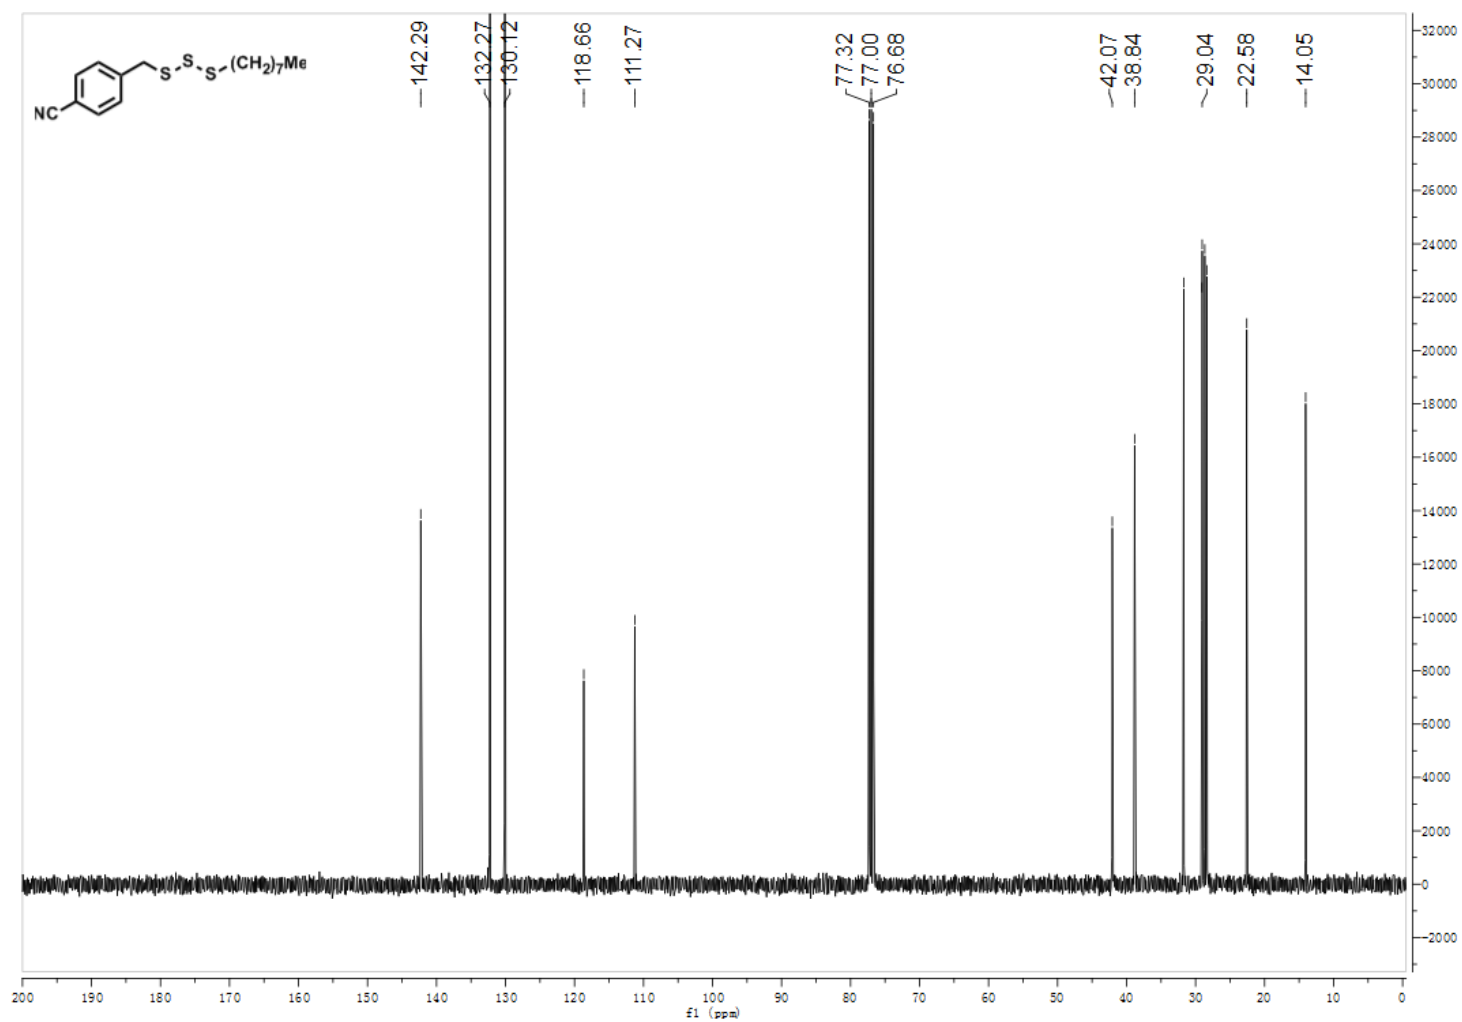

Supplementary Figure 189. <sup>13</sup>C NMR spectra for Compound 7f.

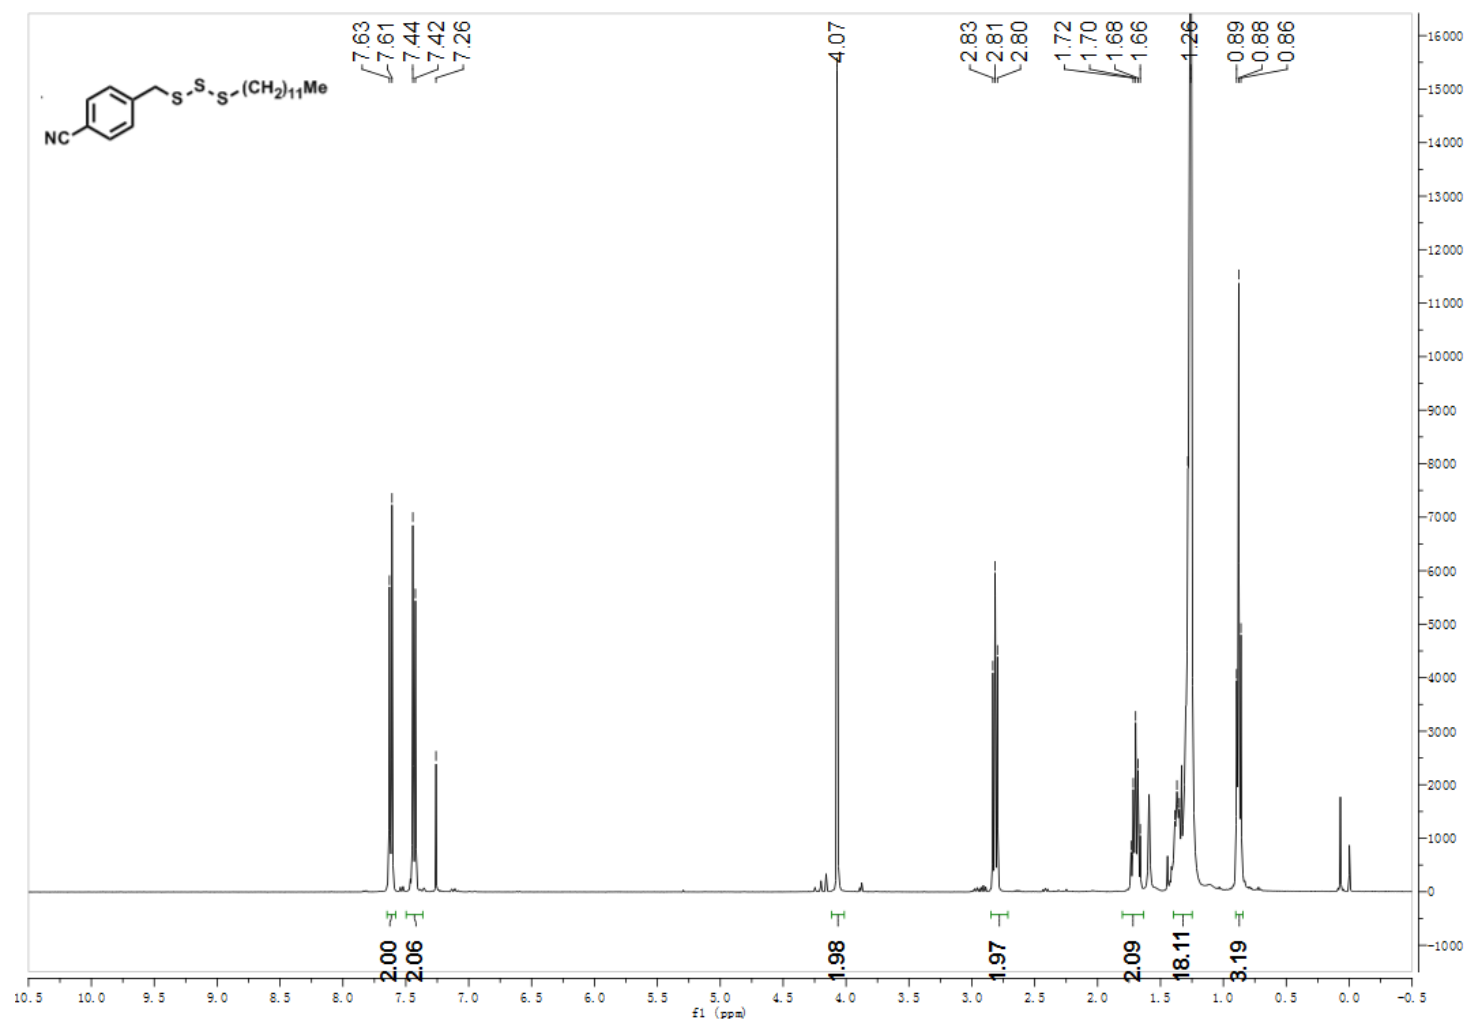

Supplementary Figure 190. <sup>1</sup>H NMR spectra for Compound 7g.

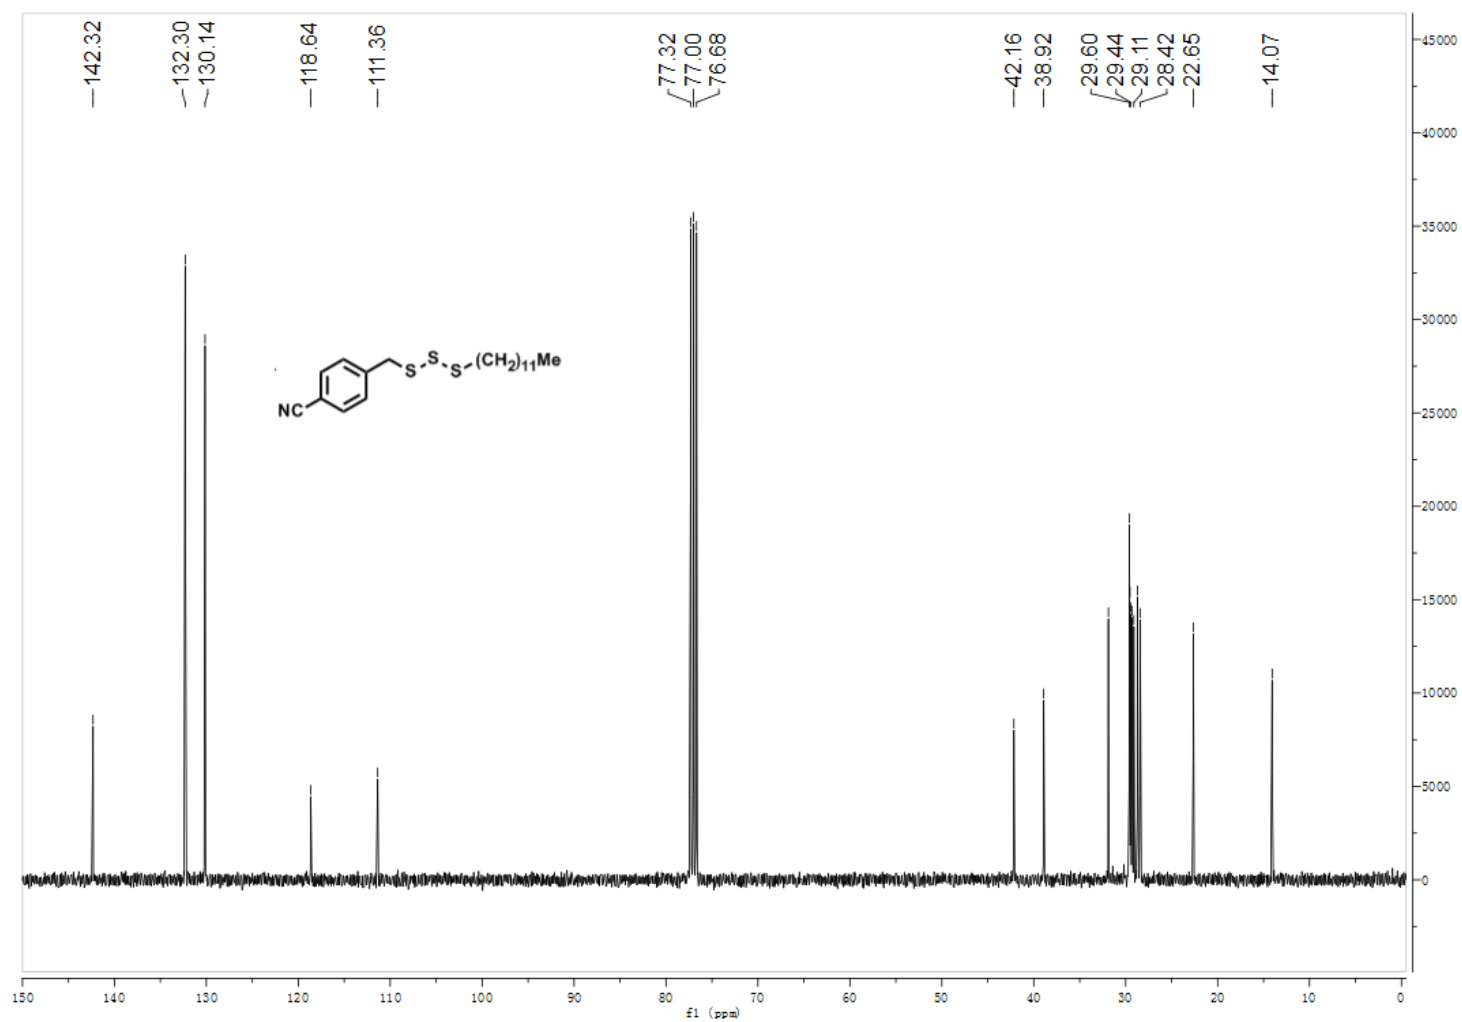

Supplementary Figure 191. <sup>13</sup>C NMR spectra for Compound 7g.

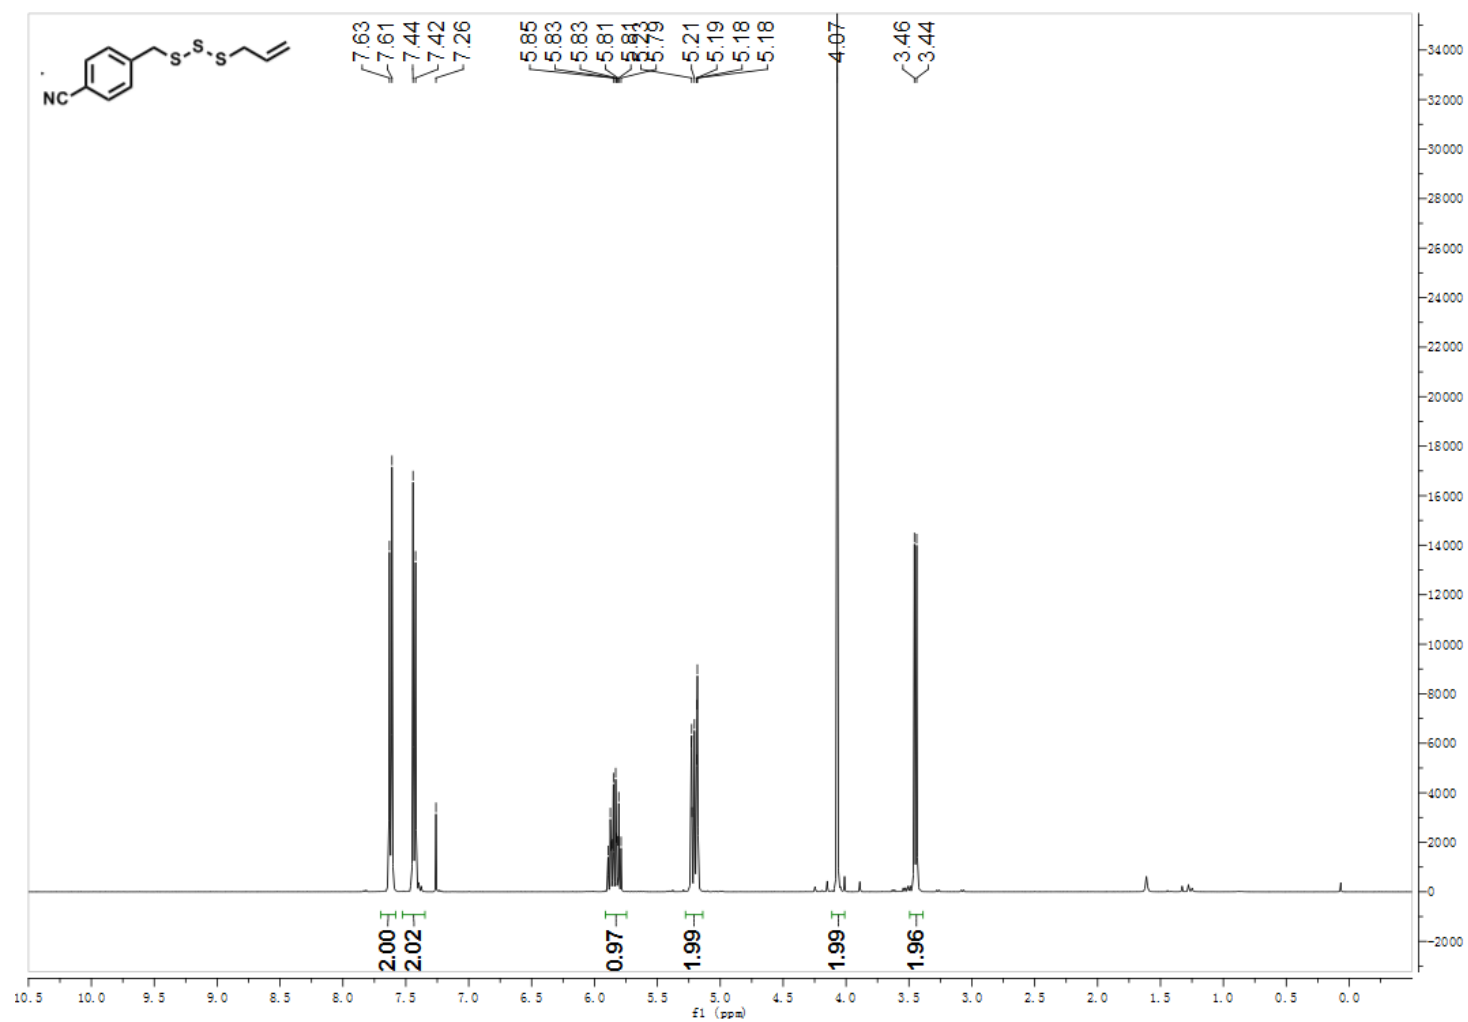

Supplementary Figure 192. <sup>1</sup>H NMR spectra for Compound 7h.

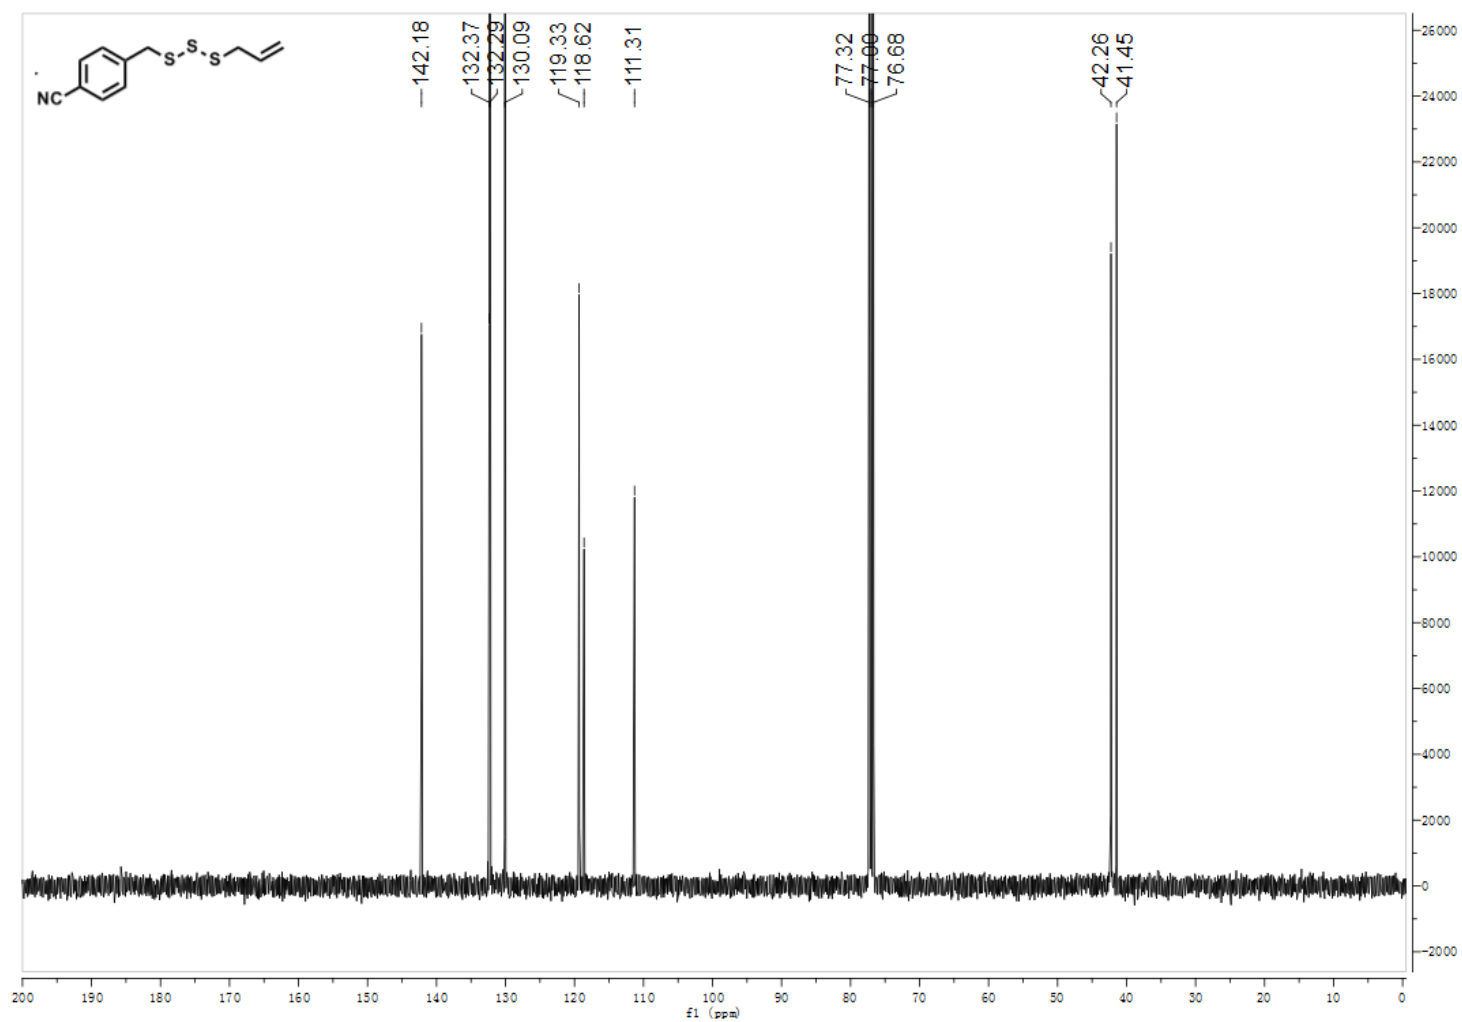

Supplementary Figure 193. <sup>13</sup>C NMR spectra for Compound 7h.

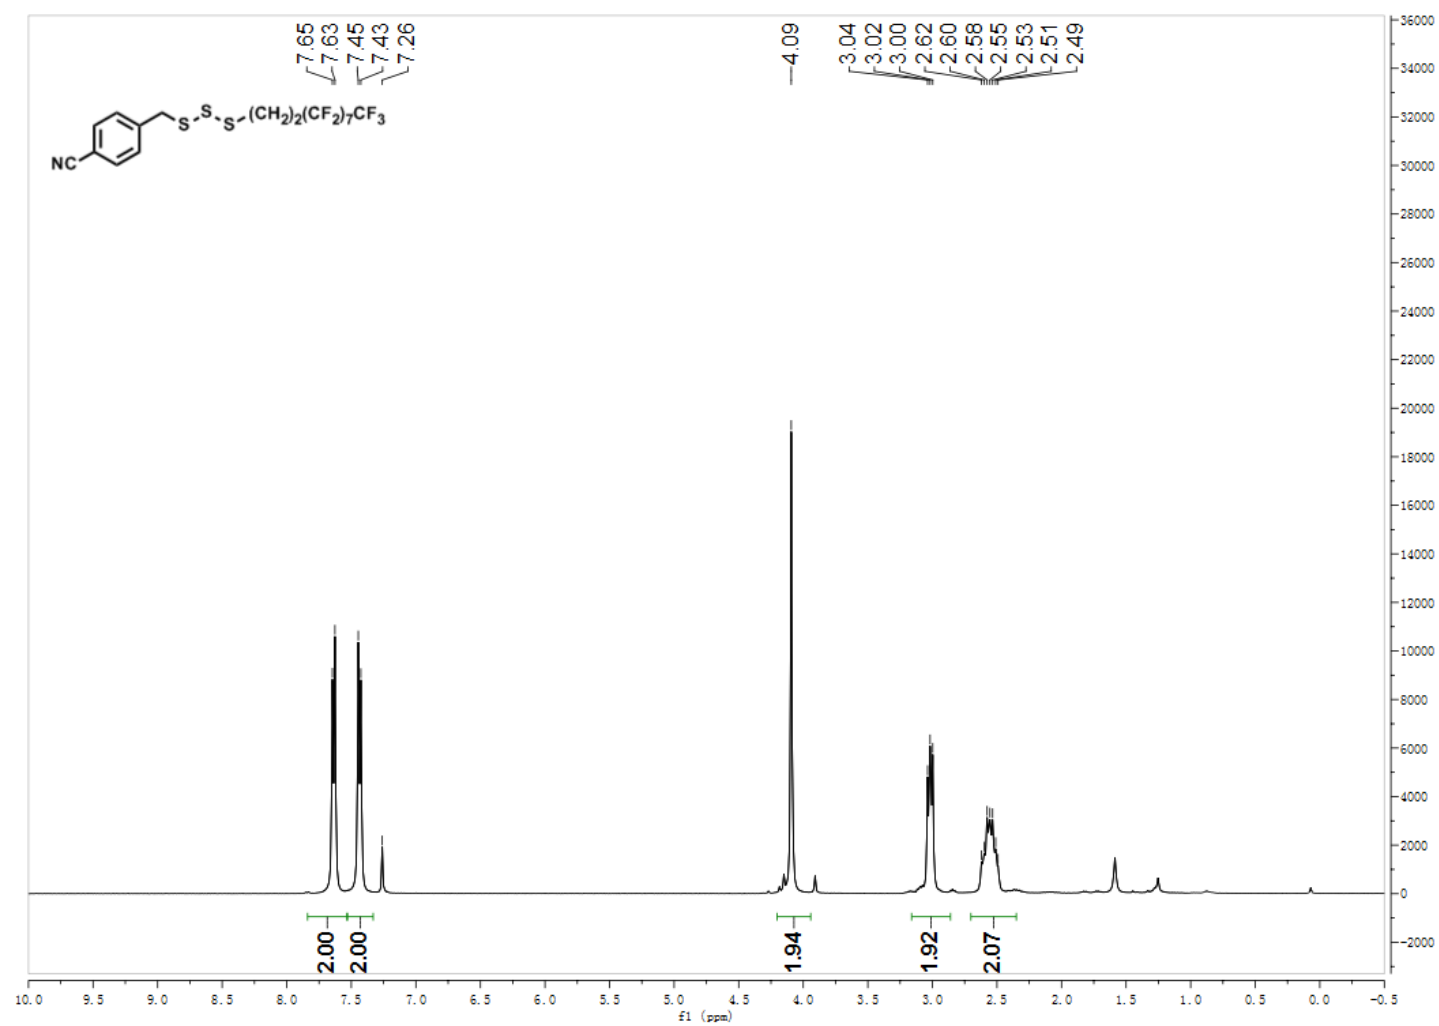

Supplementary Figure 194. <sup>1</sup>H NMR spectra for Compound 7i.

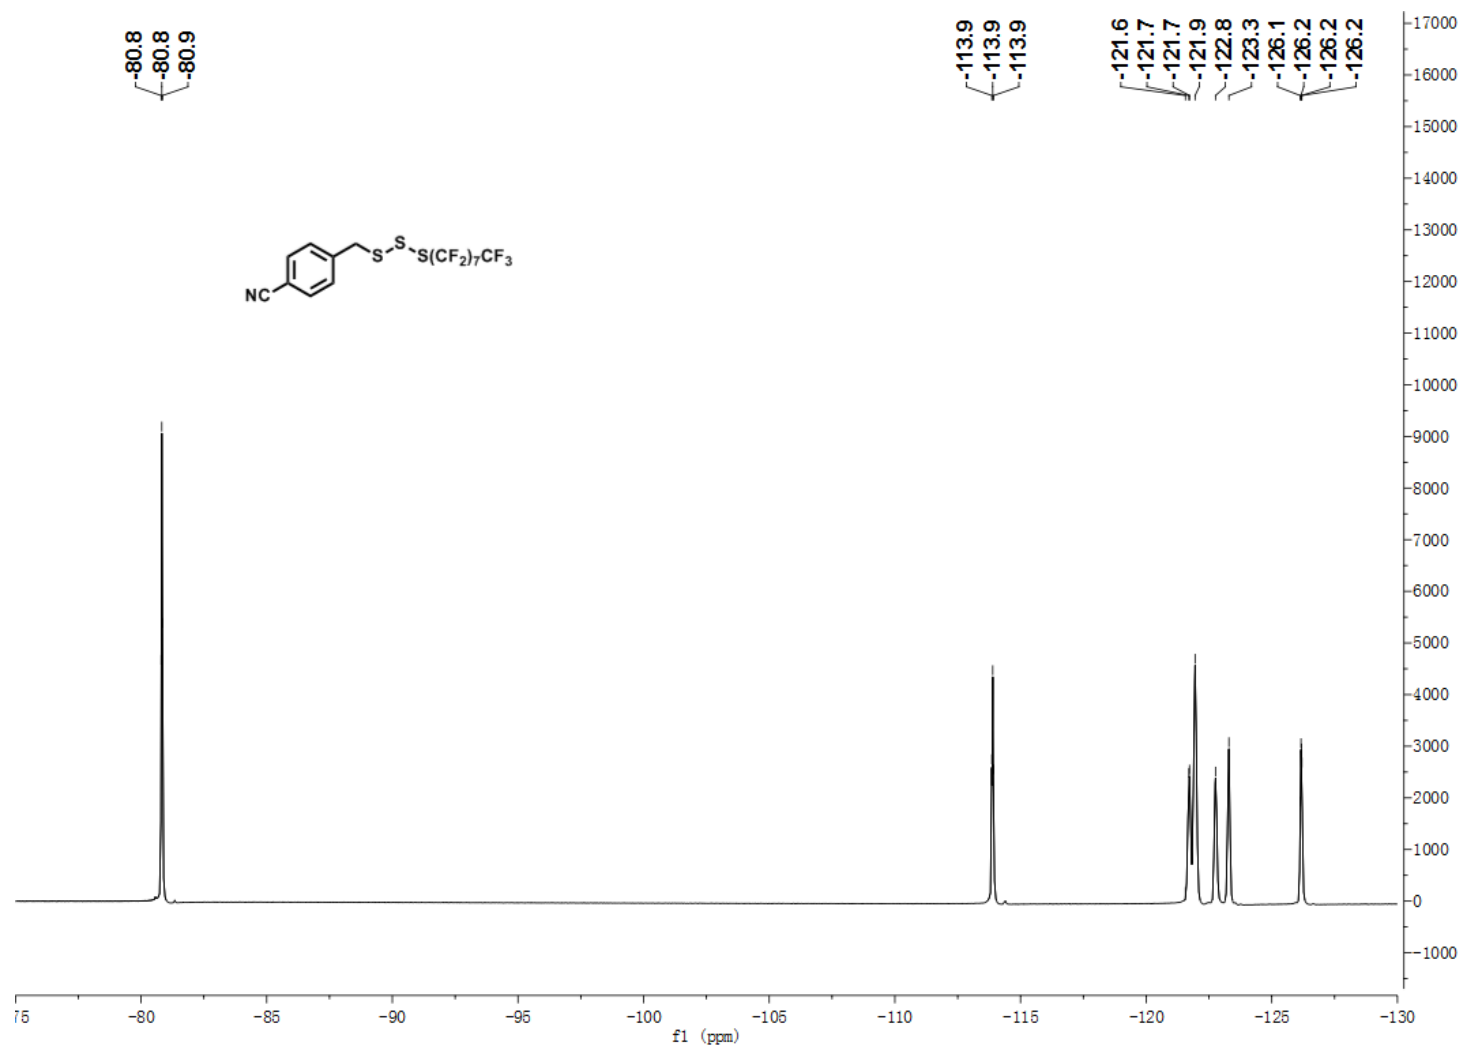

**Supplementary Figure 195.** <sup>19</sup>F NMR spectra for Compound **7i**.

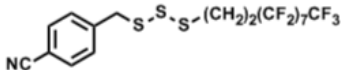

253

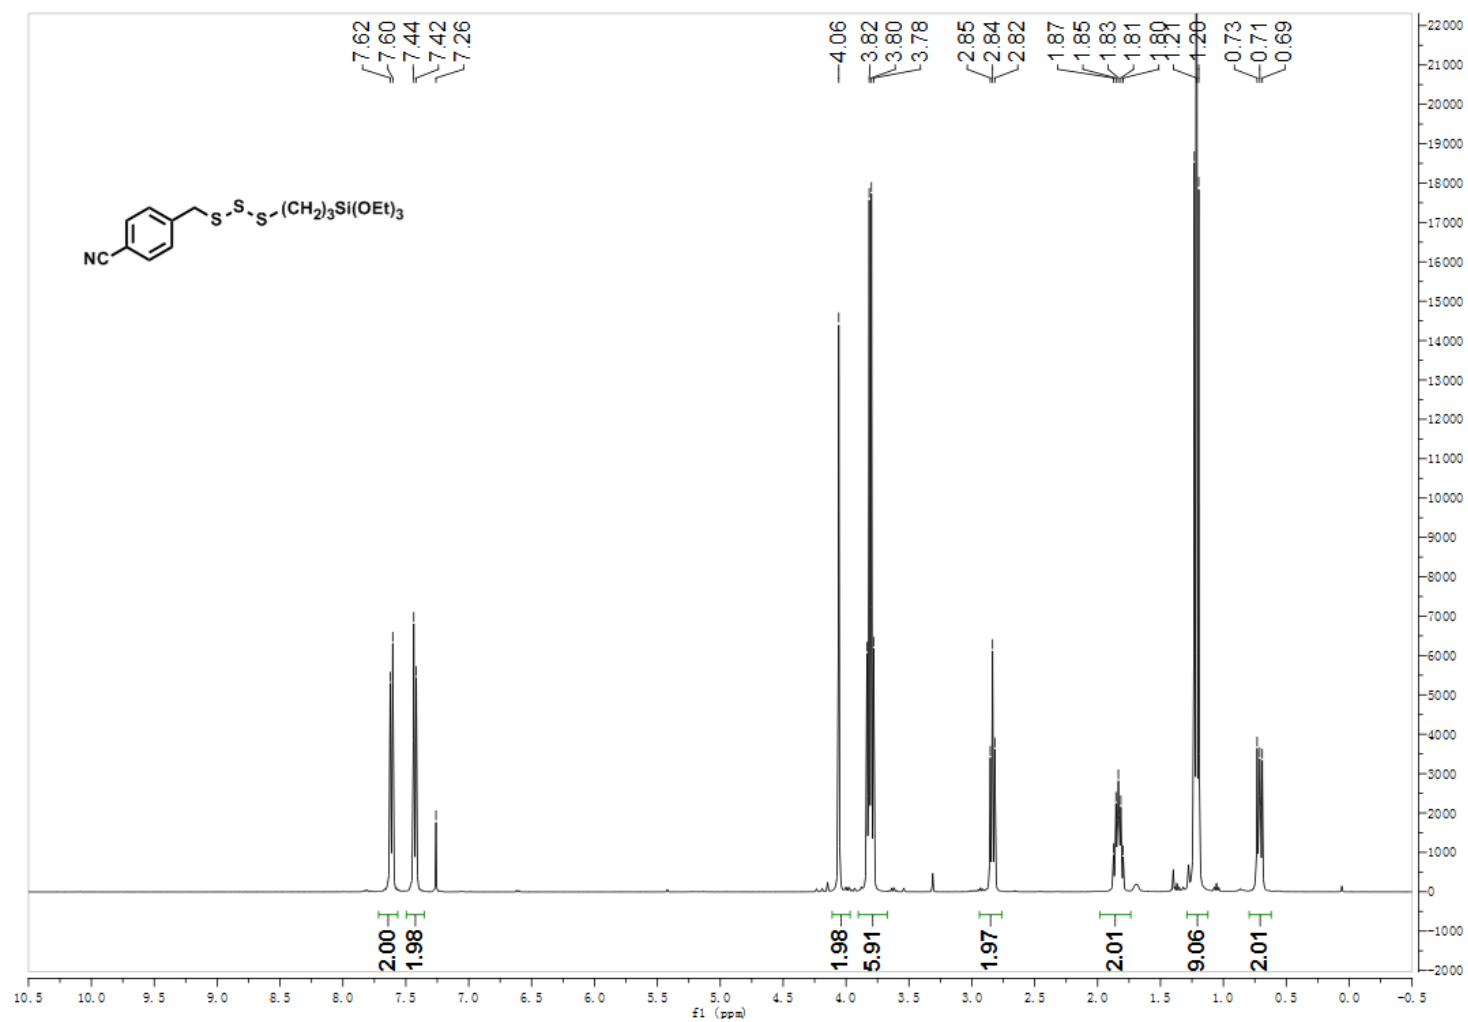

Supplementary Figure 197. <sup>1</sup>H NMR spectra for Compound 7j.

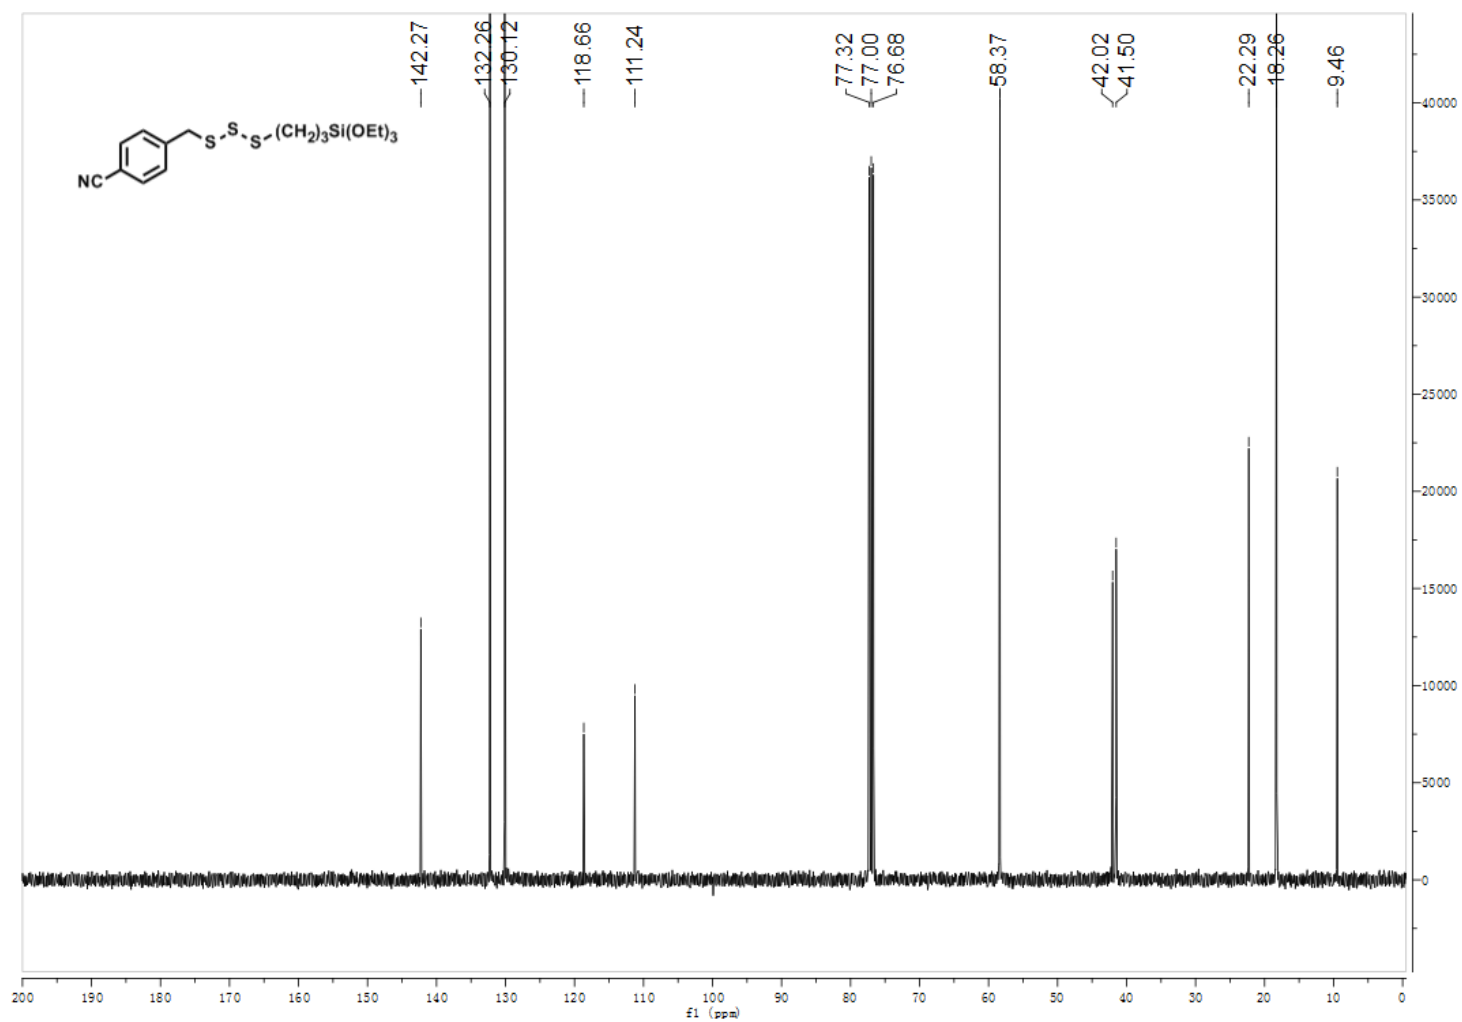

Supplementary Figure 198. <sup>13</sup>C NMR spectra for Compound 7j.

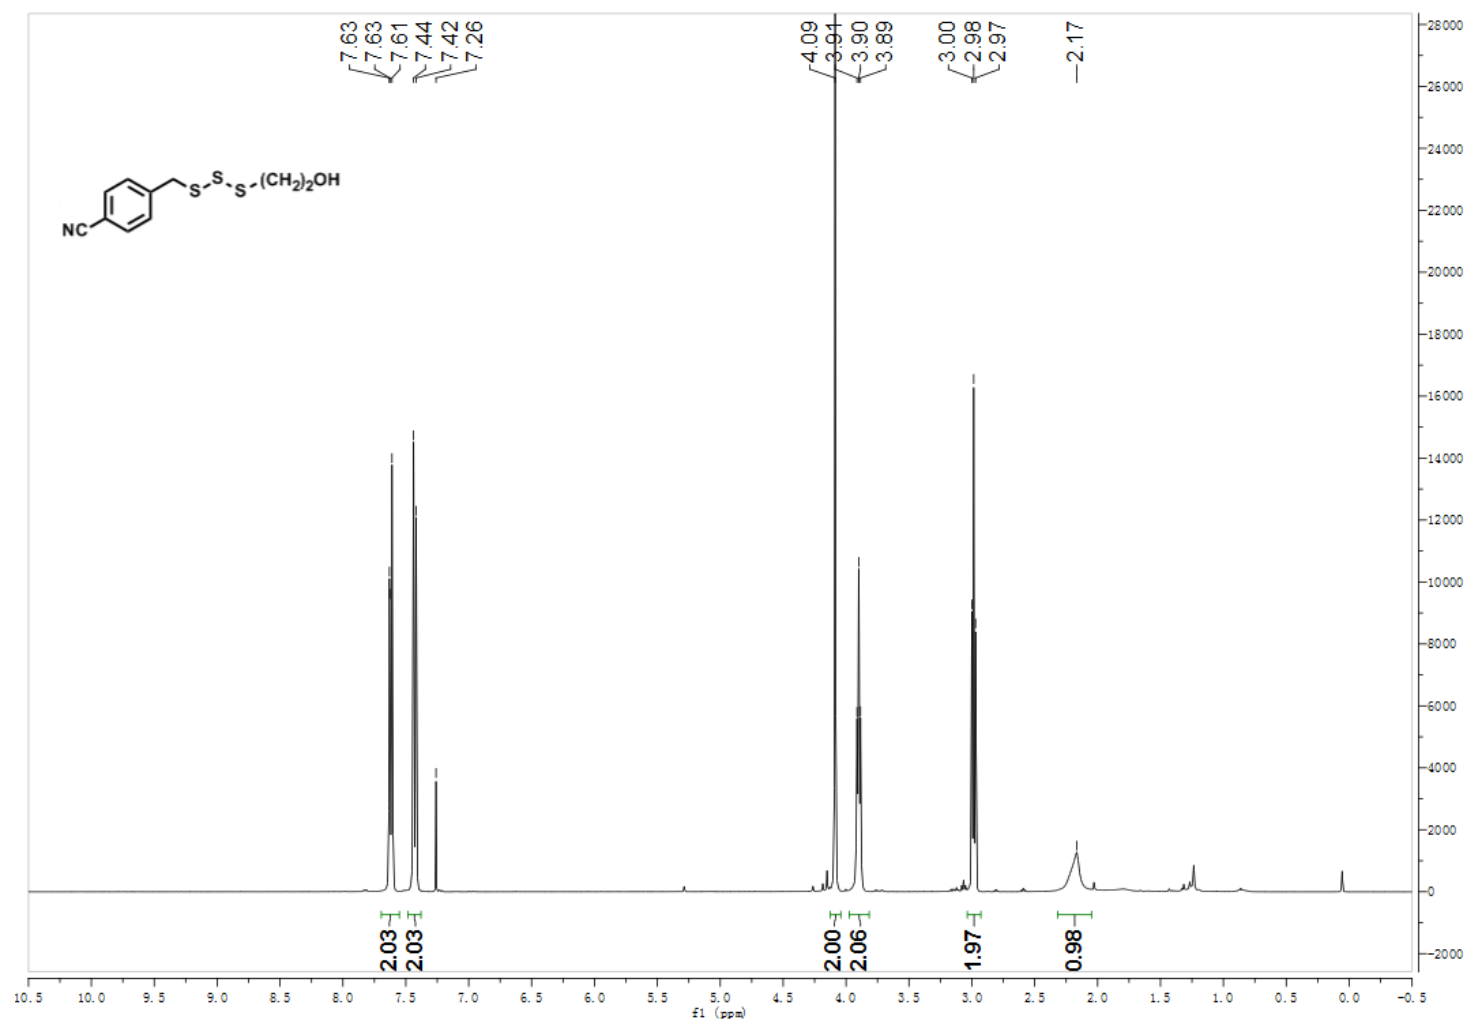

Supplementary Figure 199. <sup>1</sup>H NMR spectra for Compound 7k.

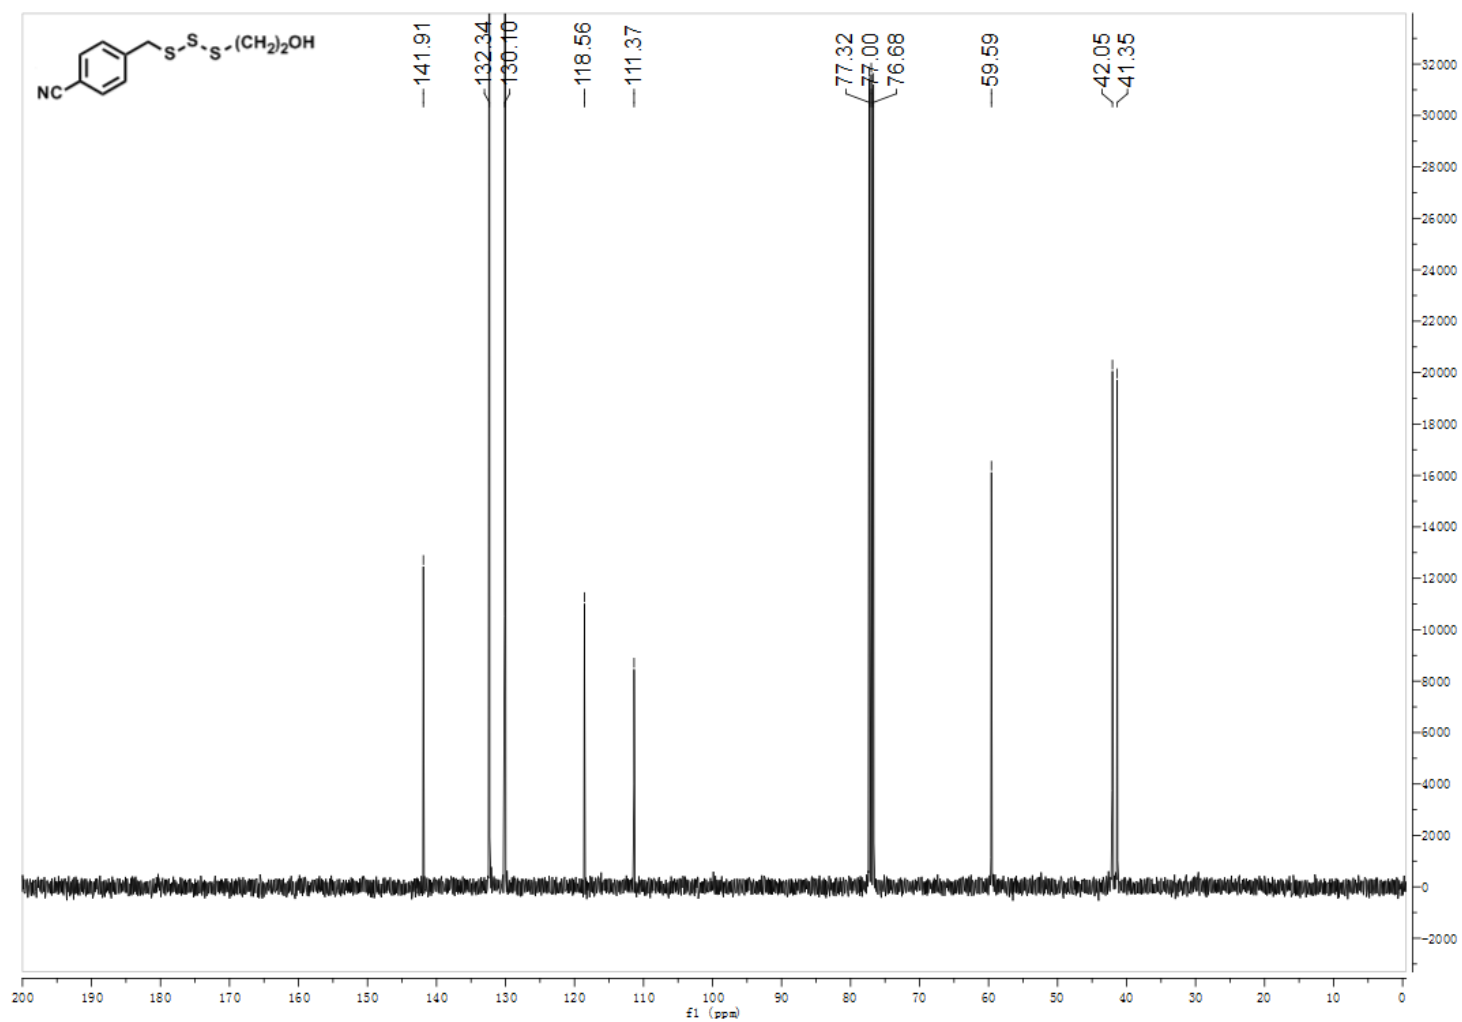

Supplementary Figure 200.  $^{13}\text{C}$  NMR spectra for Compound 7k.

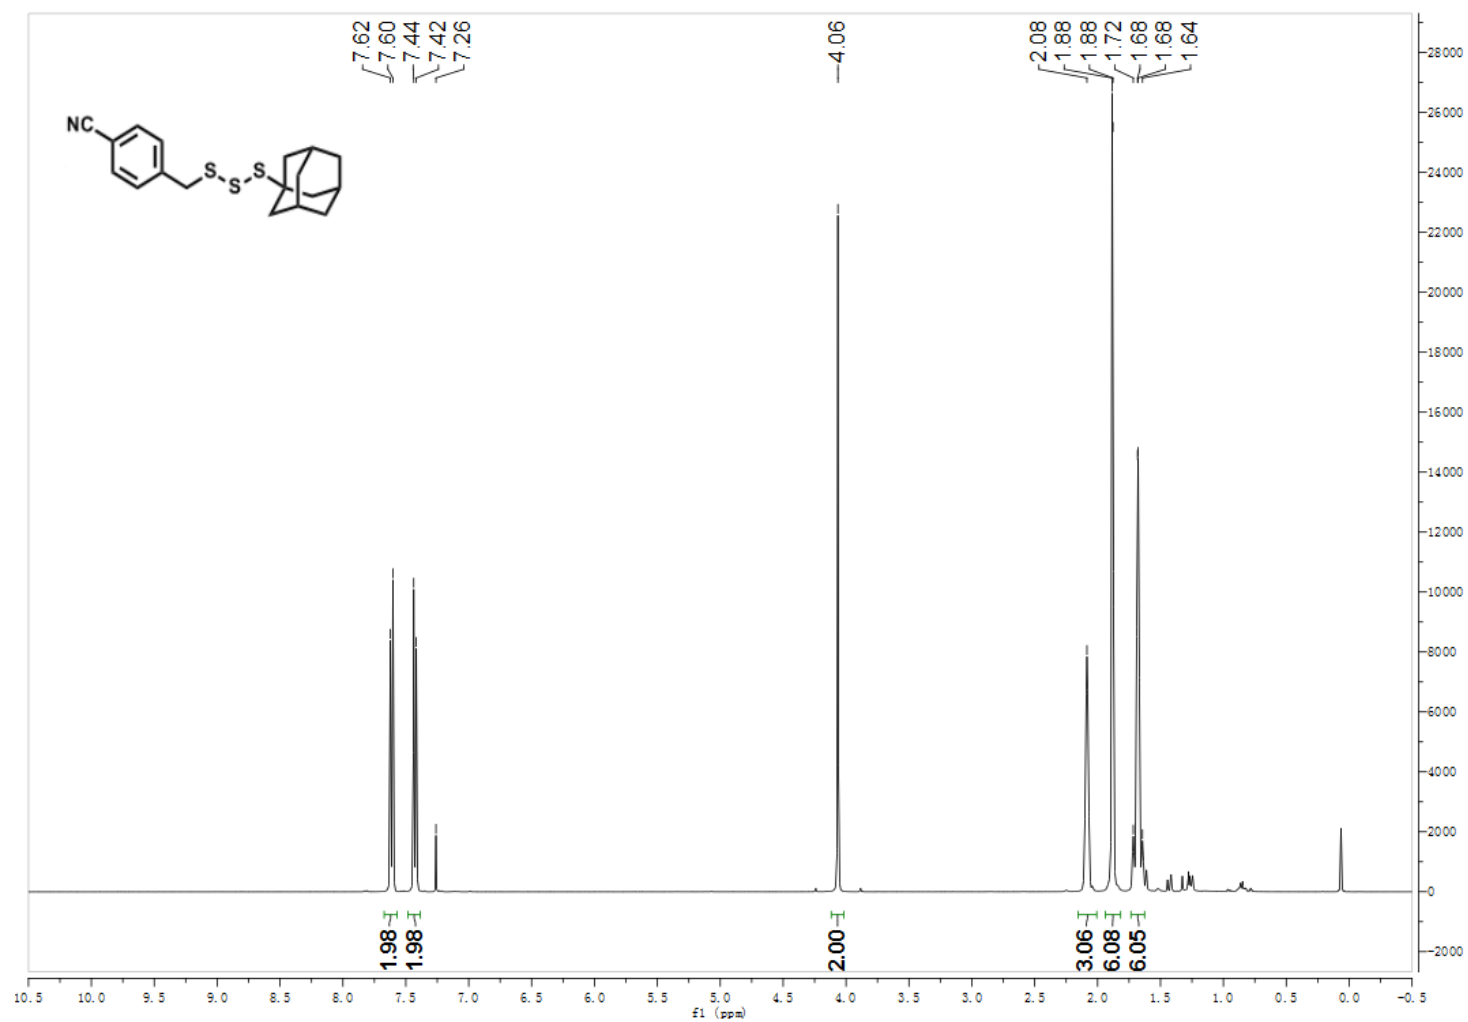

Supplementary Figure 201. <sup>1</sup>H NMR spectra for Compound 71.

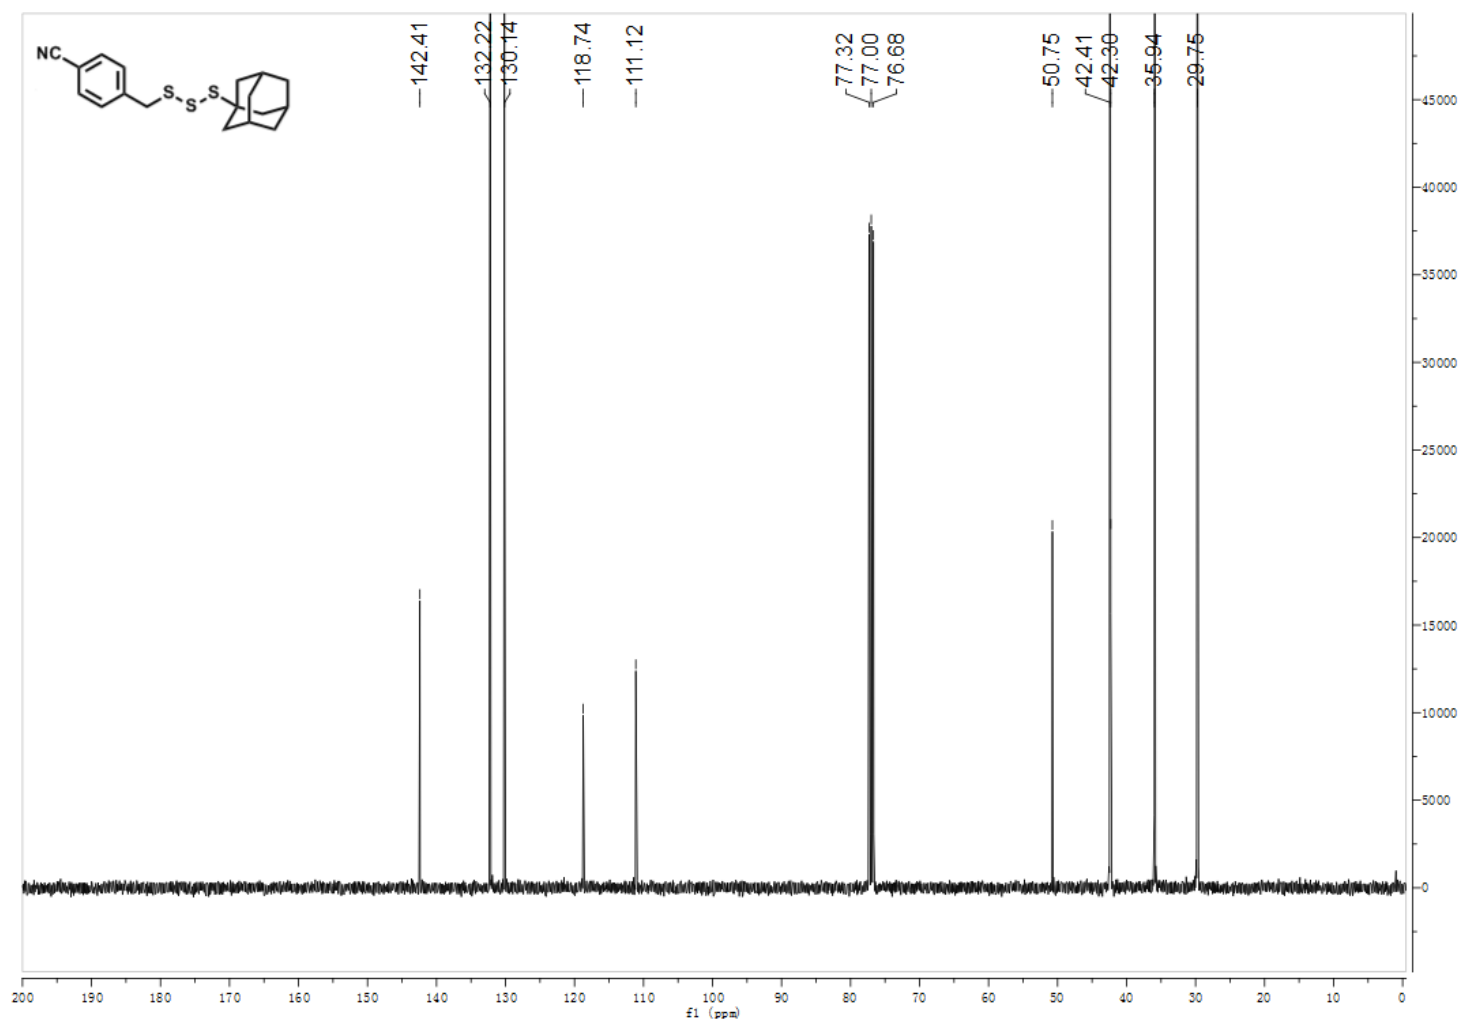

**Supplementary Figure 202.** <sup>13</sup>C NMR spectra for Compound 7I.

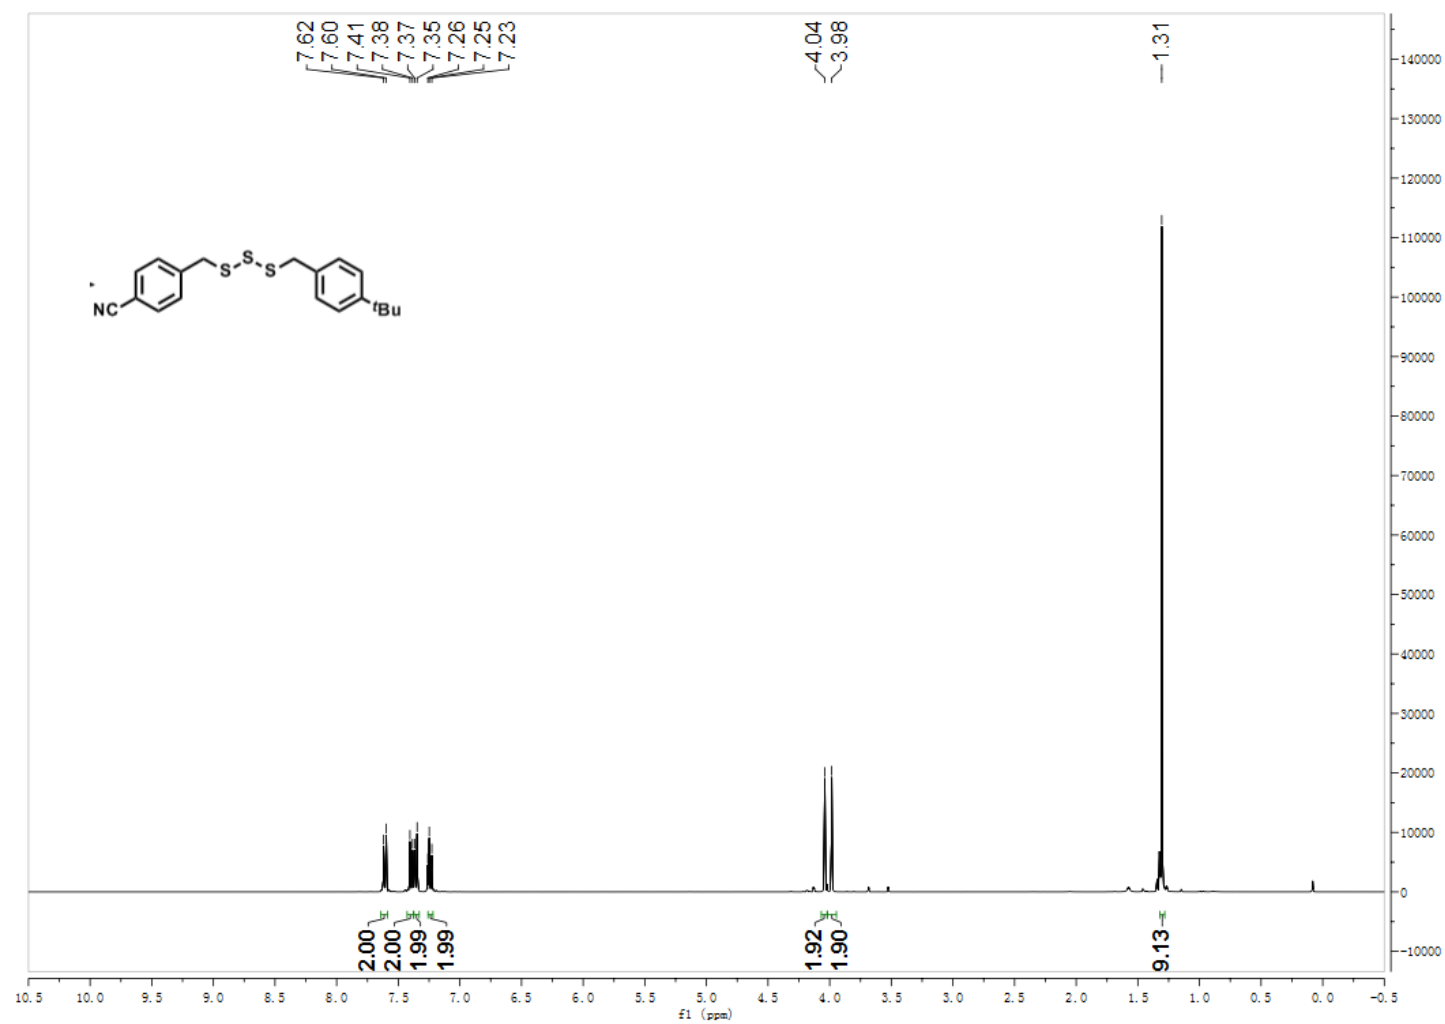

Supplementary Figure 203. <sup>1</sup>H NMR spectra for Compound 7m.

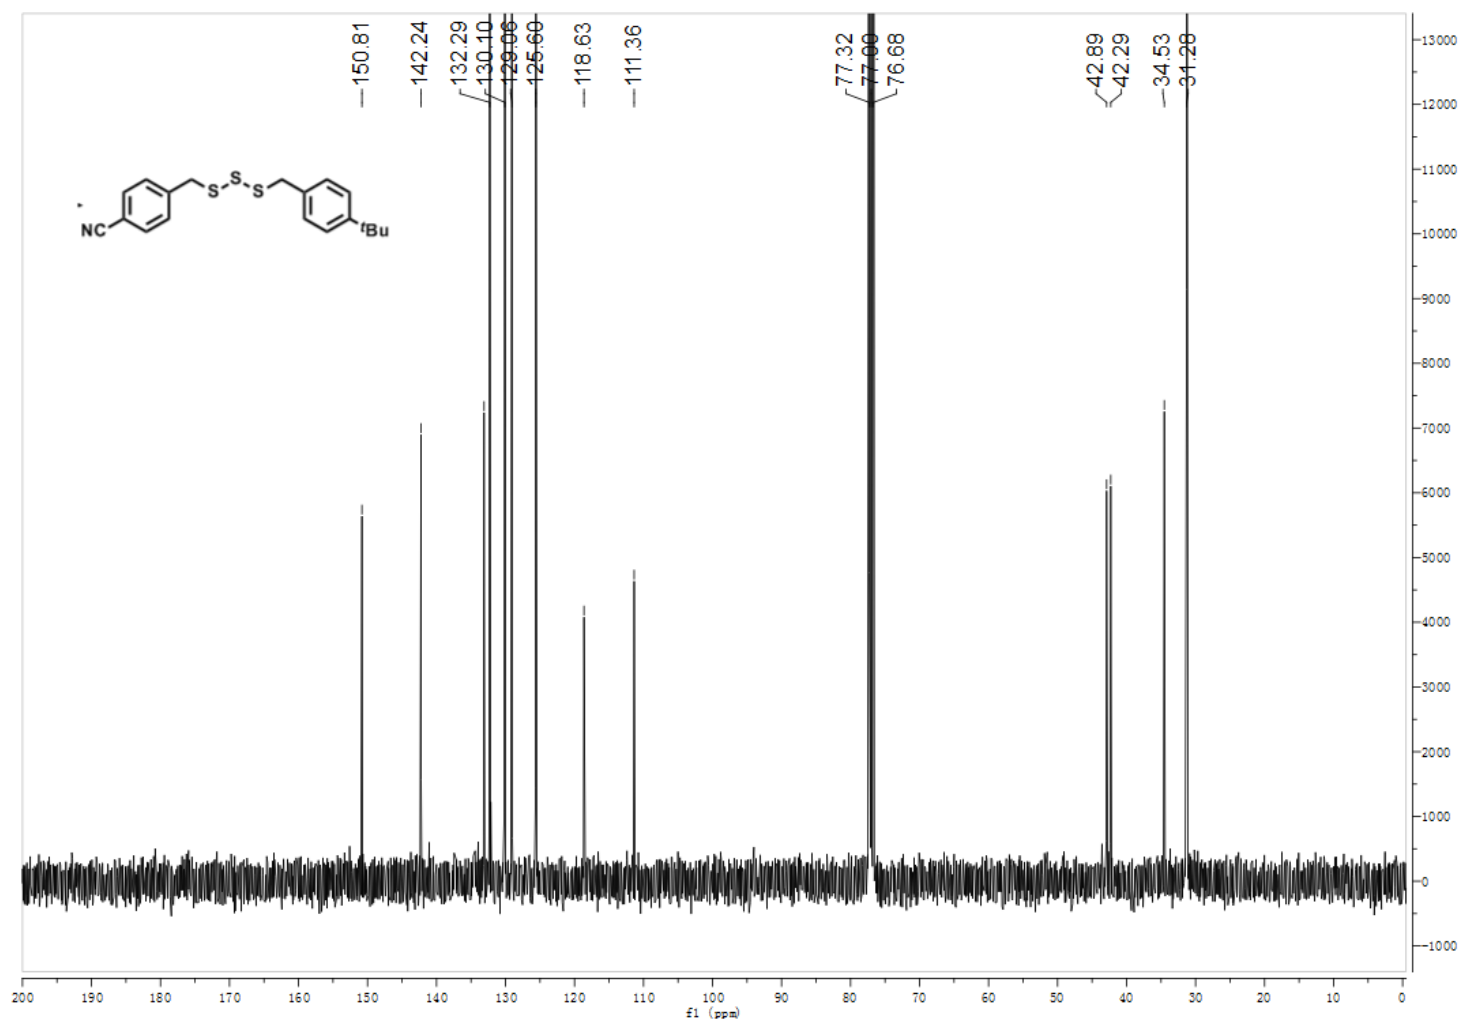

Supplementary Figure 204. <sup>13</sup>C NMR spectra for Compound 7m.

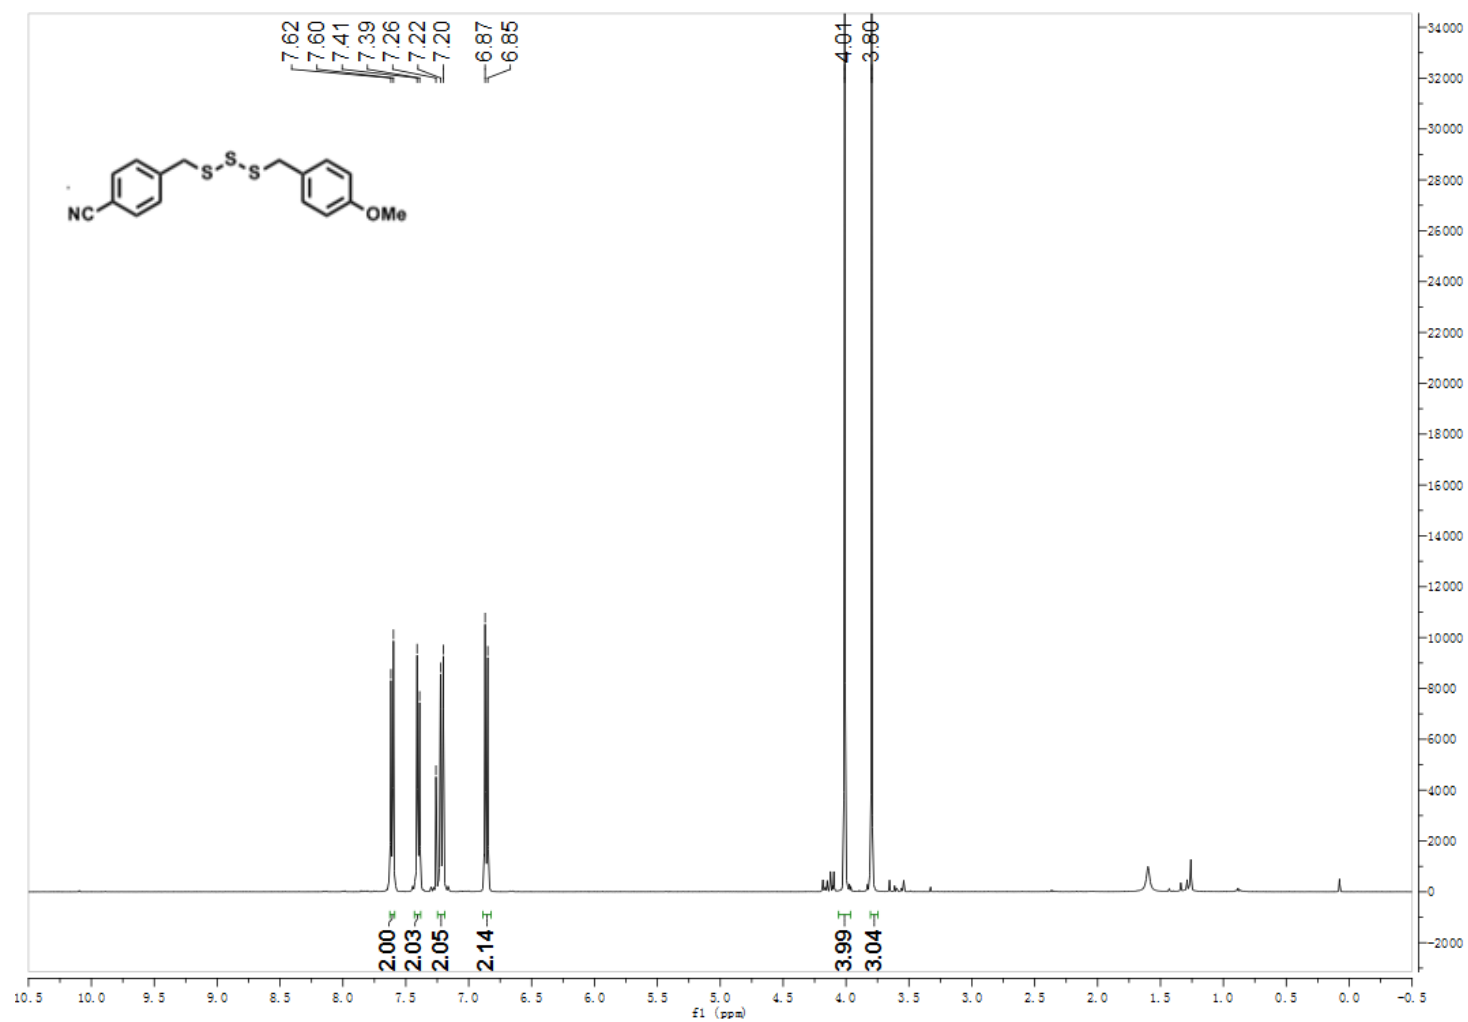

Supplementary Figure 205. <sup>1</sup>H NMR spectra for Compound 7n.

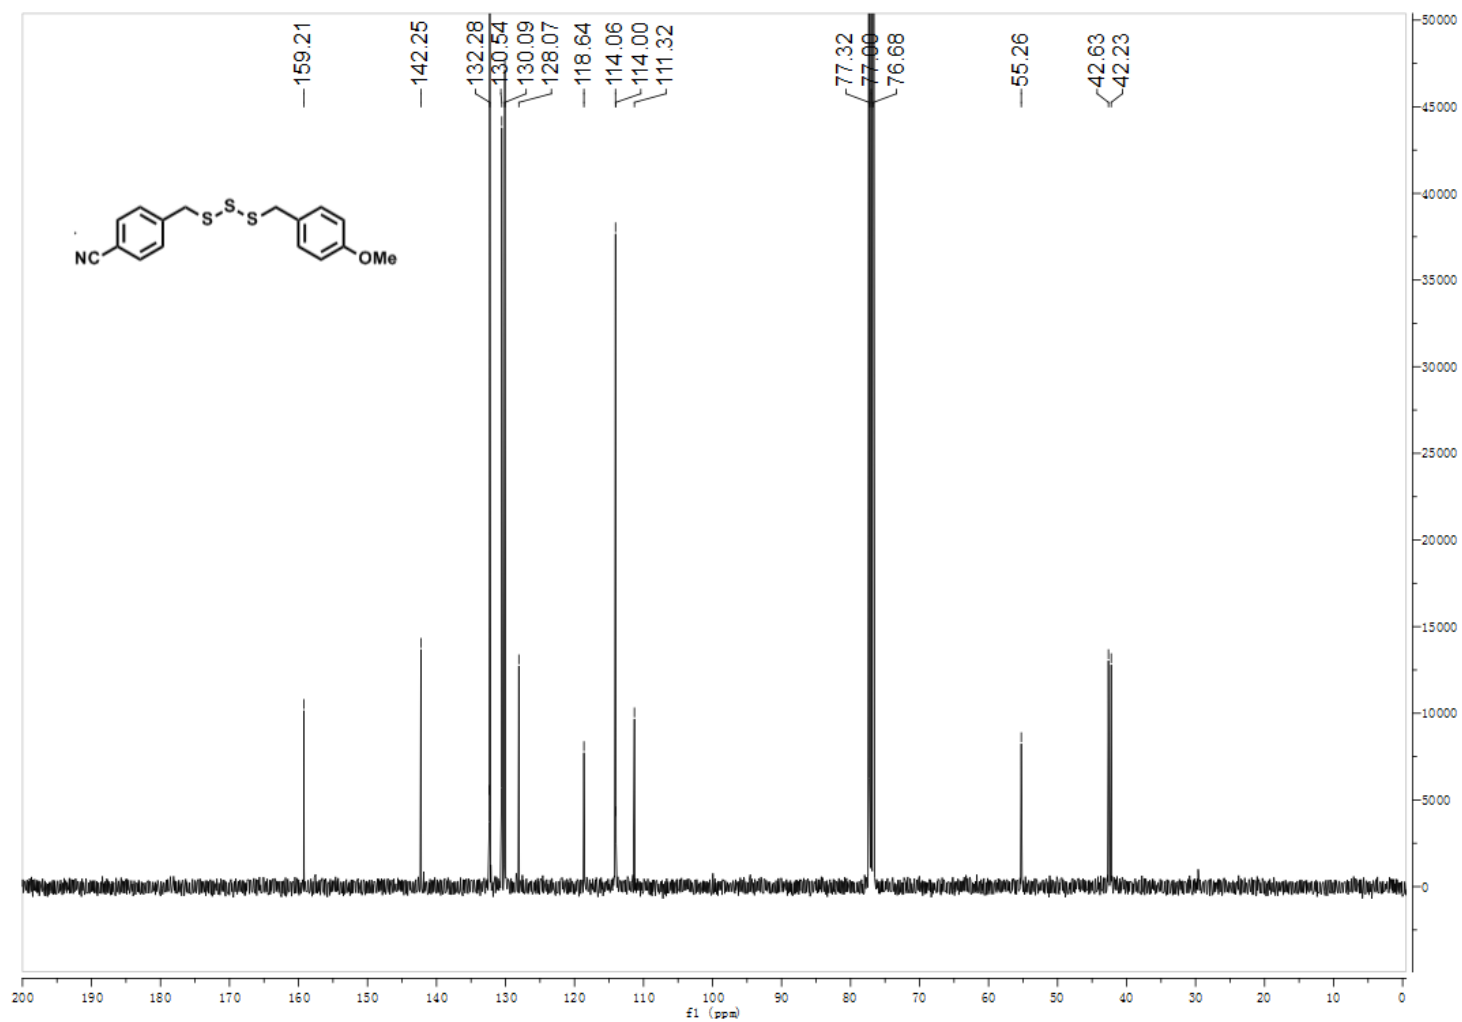

Supplementary Figure 206. <sup>13</sup>C NMR spectra for Compound 7n.

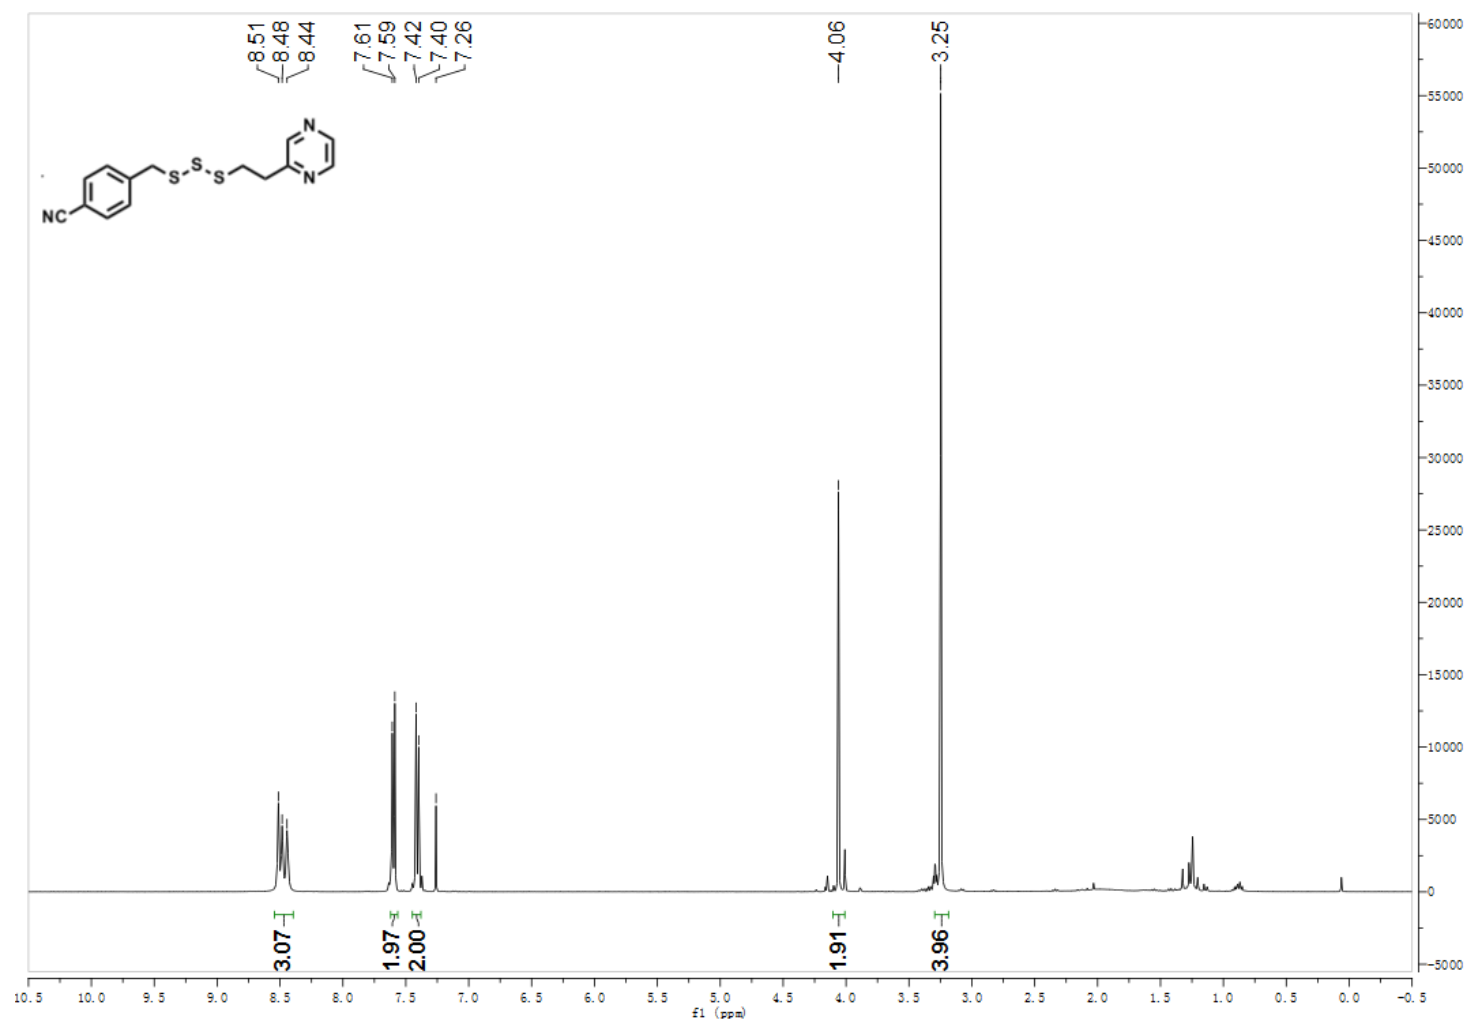

Supplementary Figure 207. <sup>1</sup>H NMR spectra for Compound 7o.

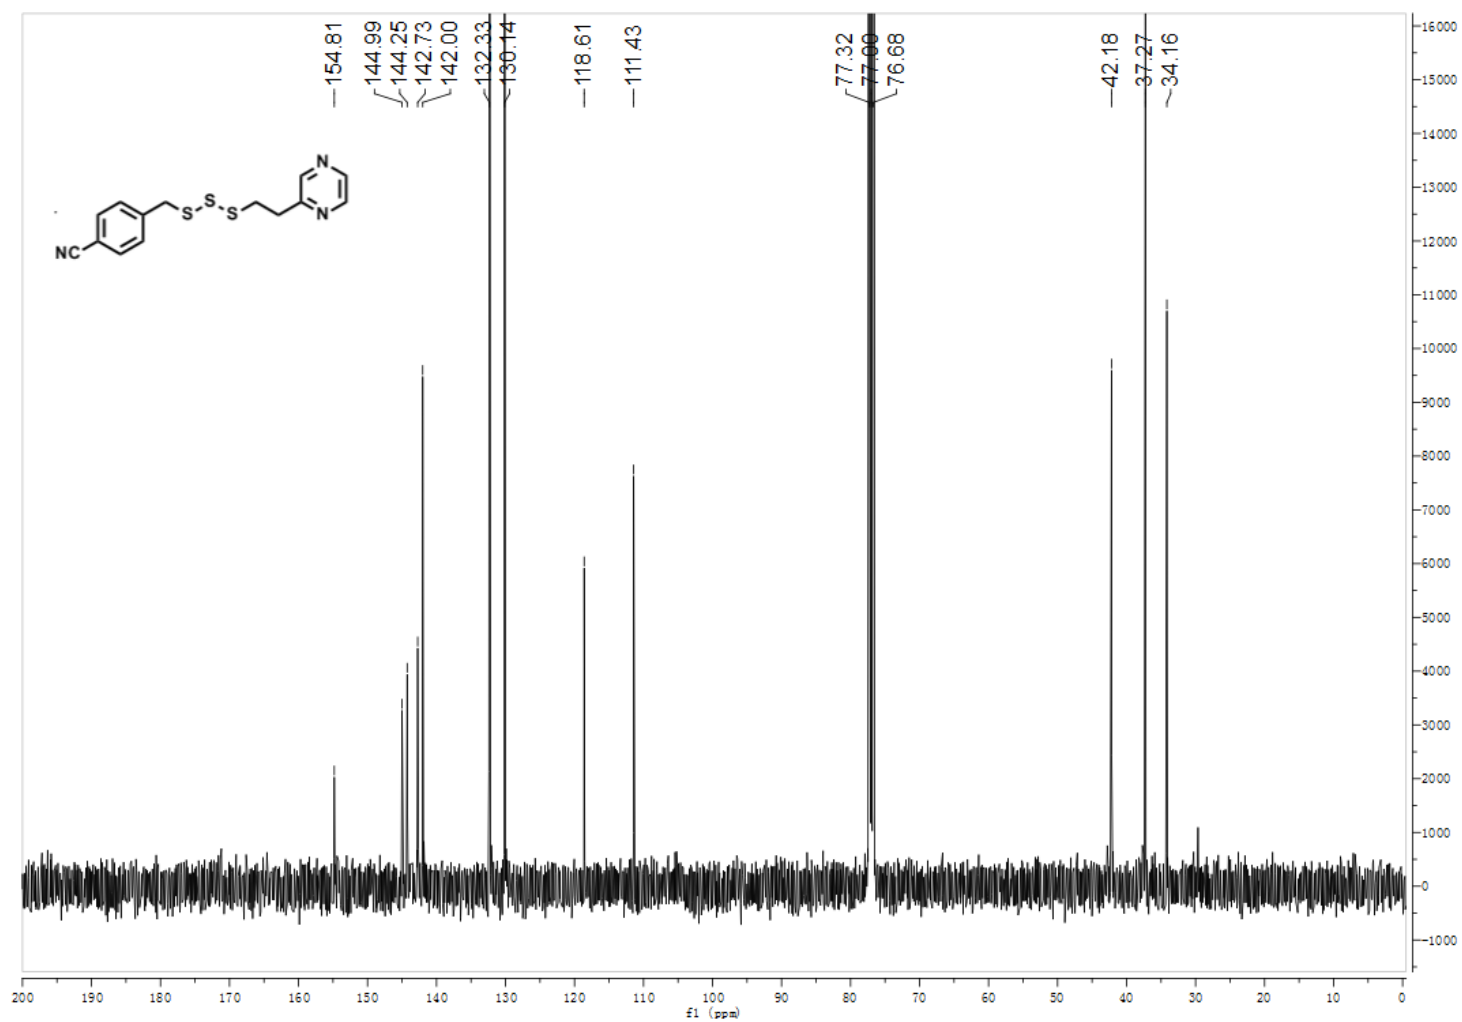

**Supplementary Figure 208.** <sup>13</sup>C NMR spectra for Compound **7o**.

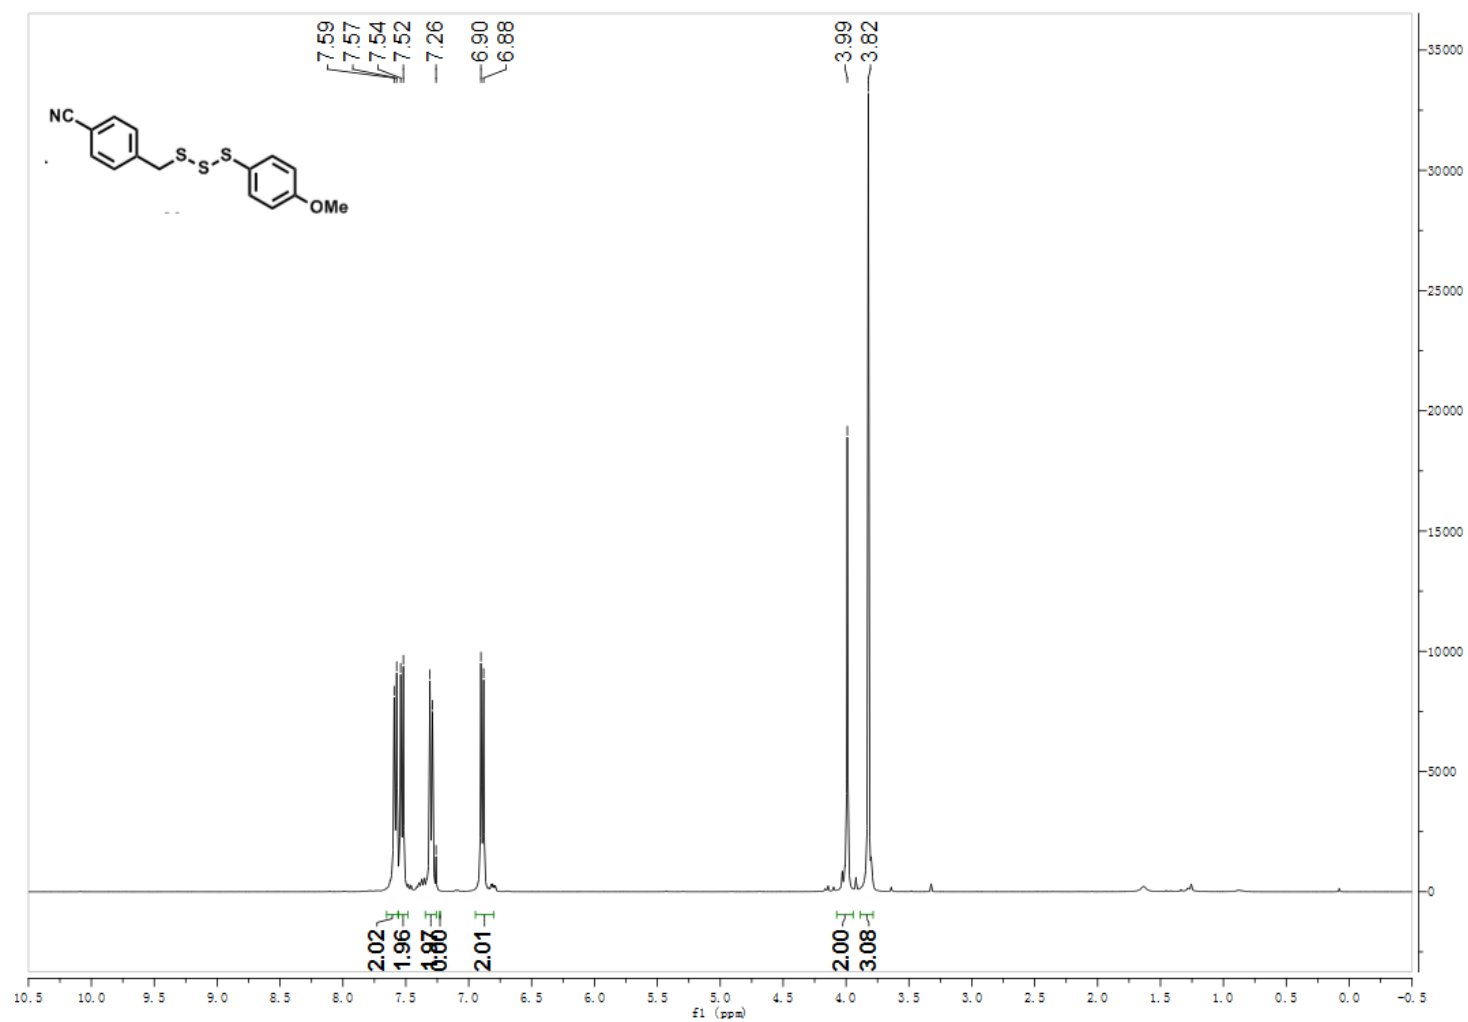

Supplementary Figure 209. <sup>1</sup>H NMR spectra for Compound 7p.

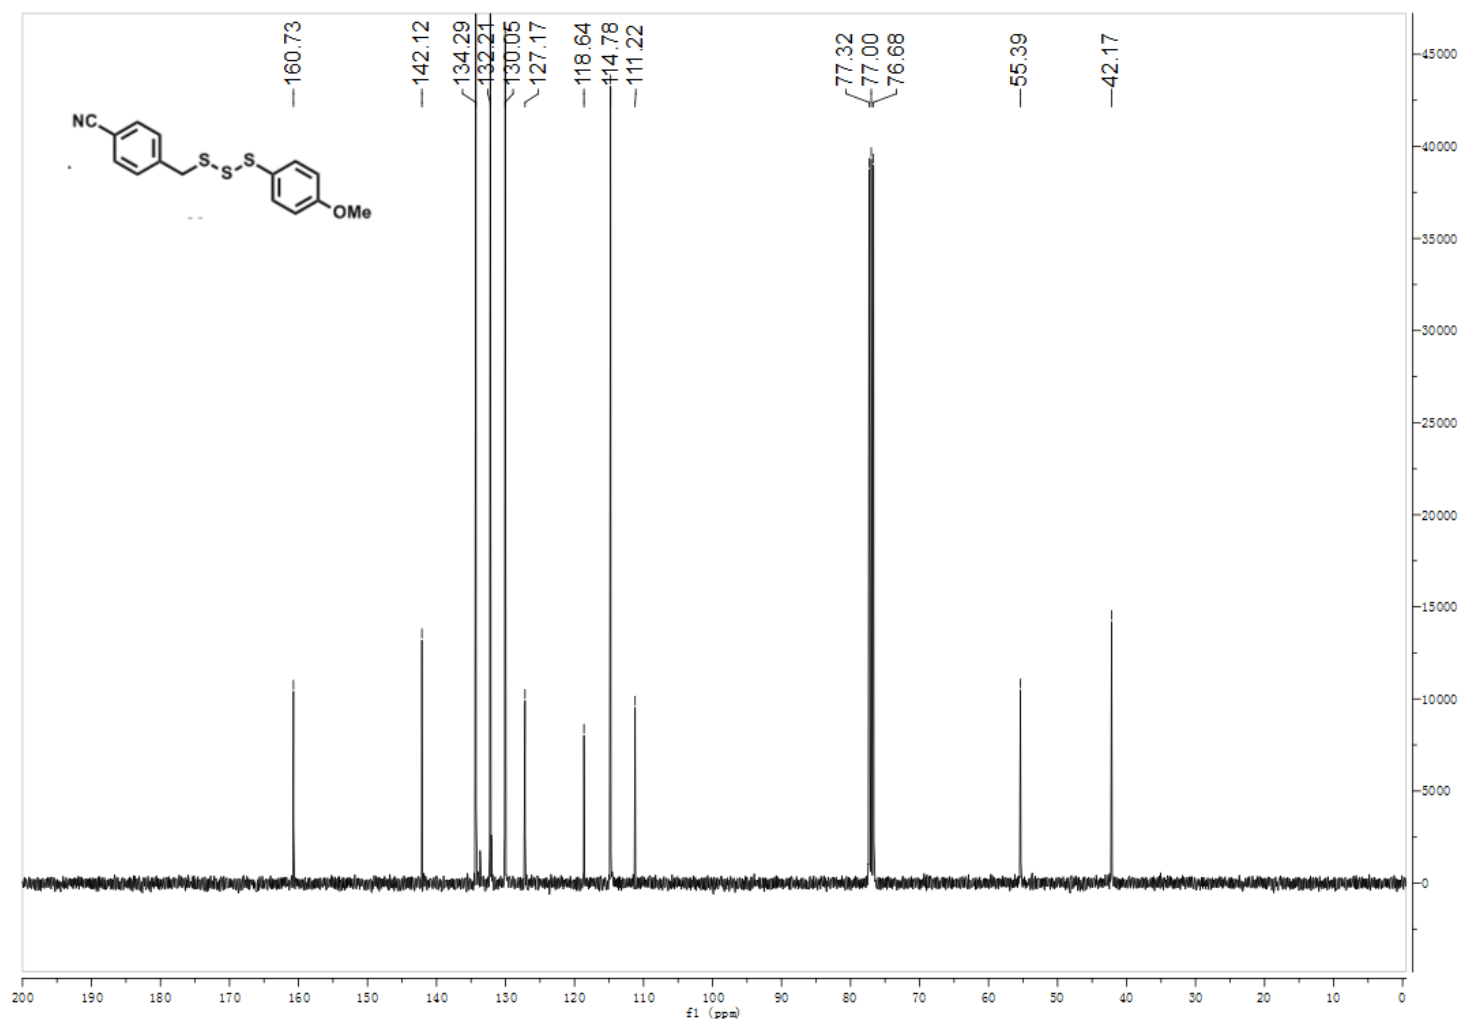

Supplementary Figure 210. <sup>13</sup>C NMR spectra for Compound 7p.

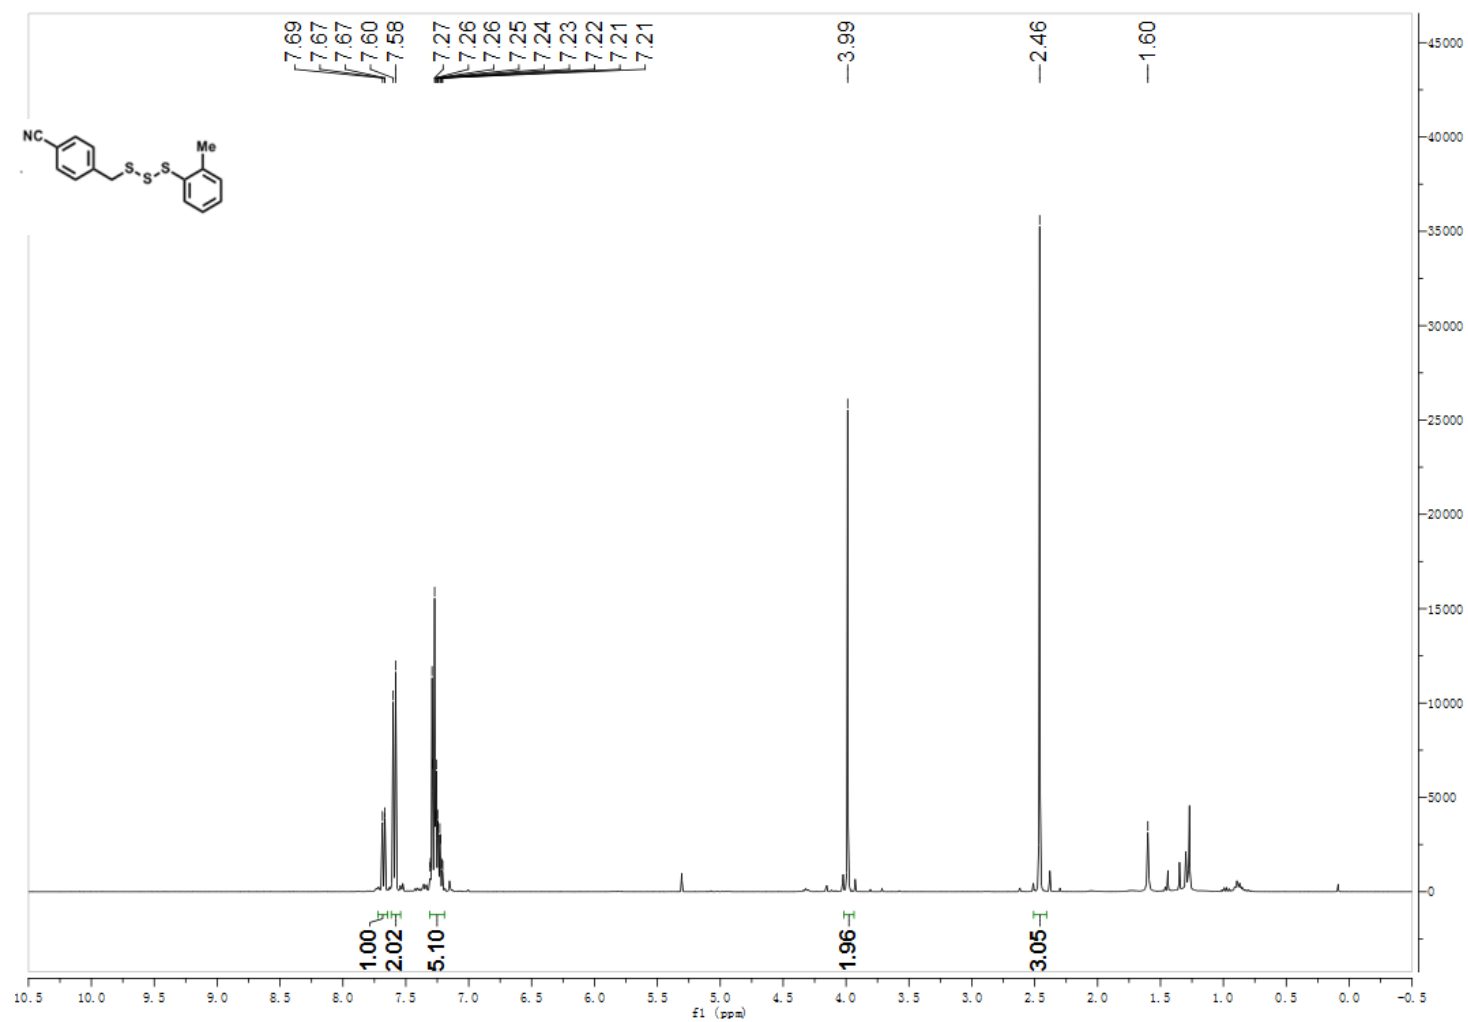

Supplementary Figure 211. <sup>1</sup>H NMR spectra for Compound 7q.

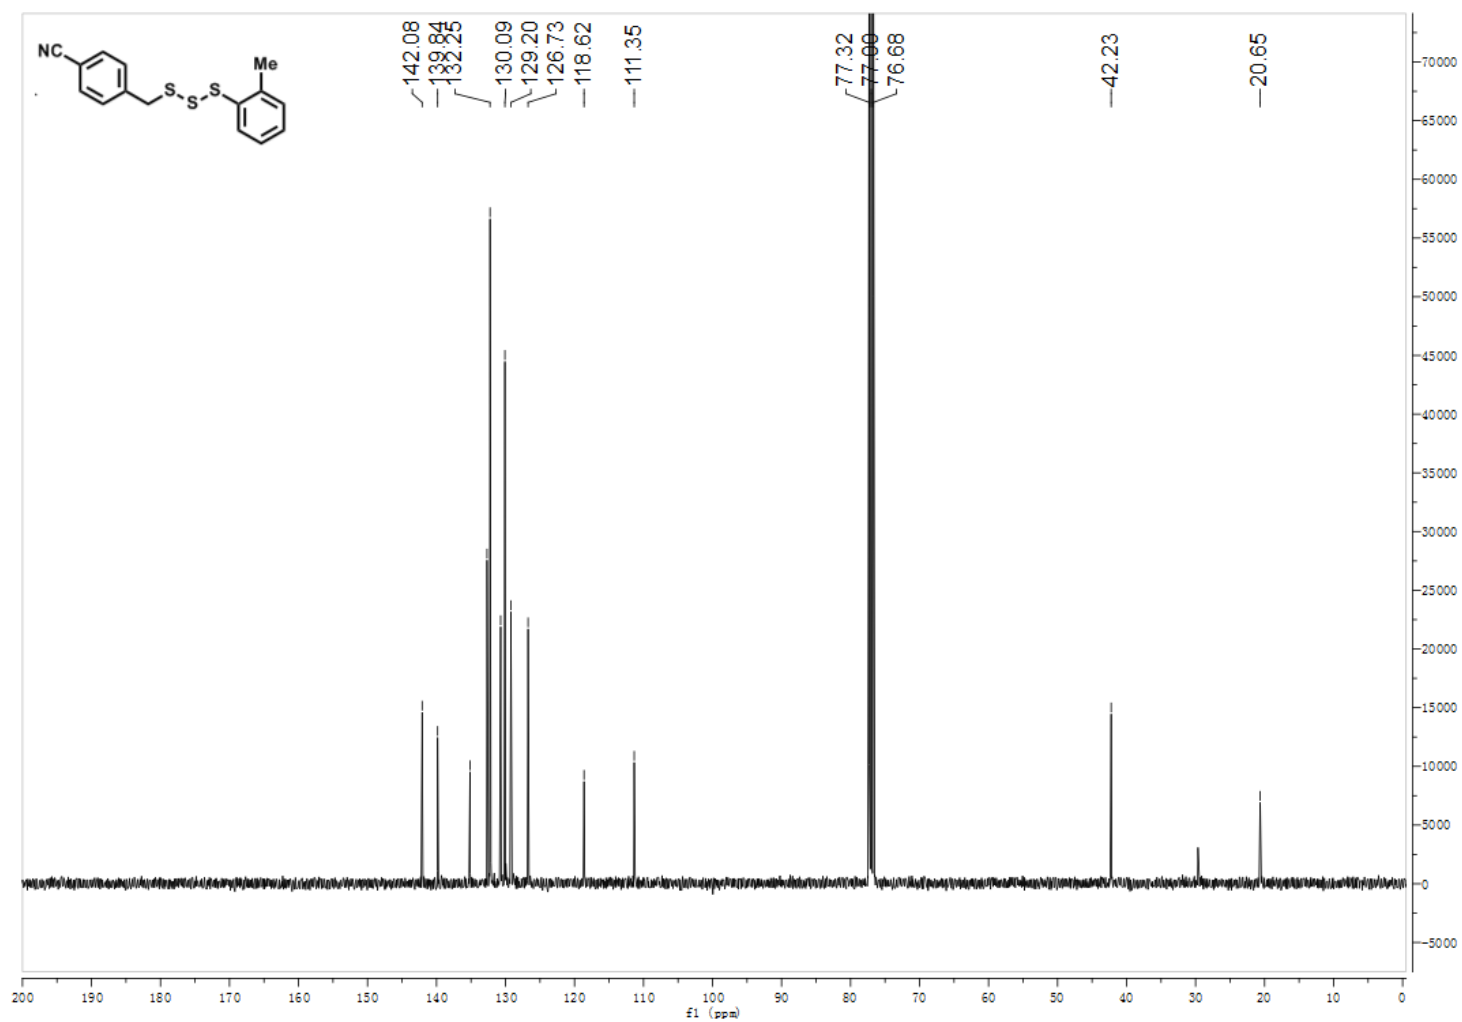

Supplementary Figure 212.  $^{13}\text{C}$  NMR spectra for Compound 7q.

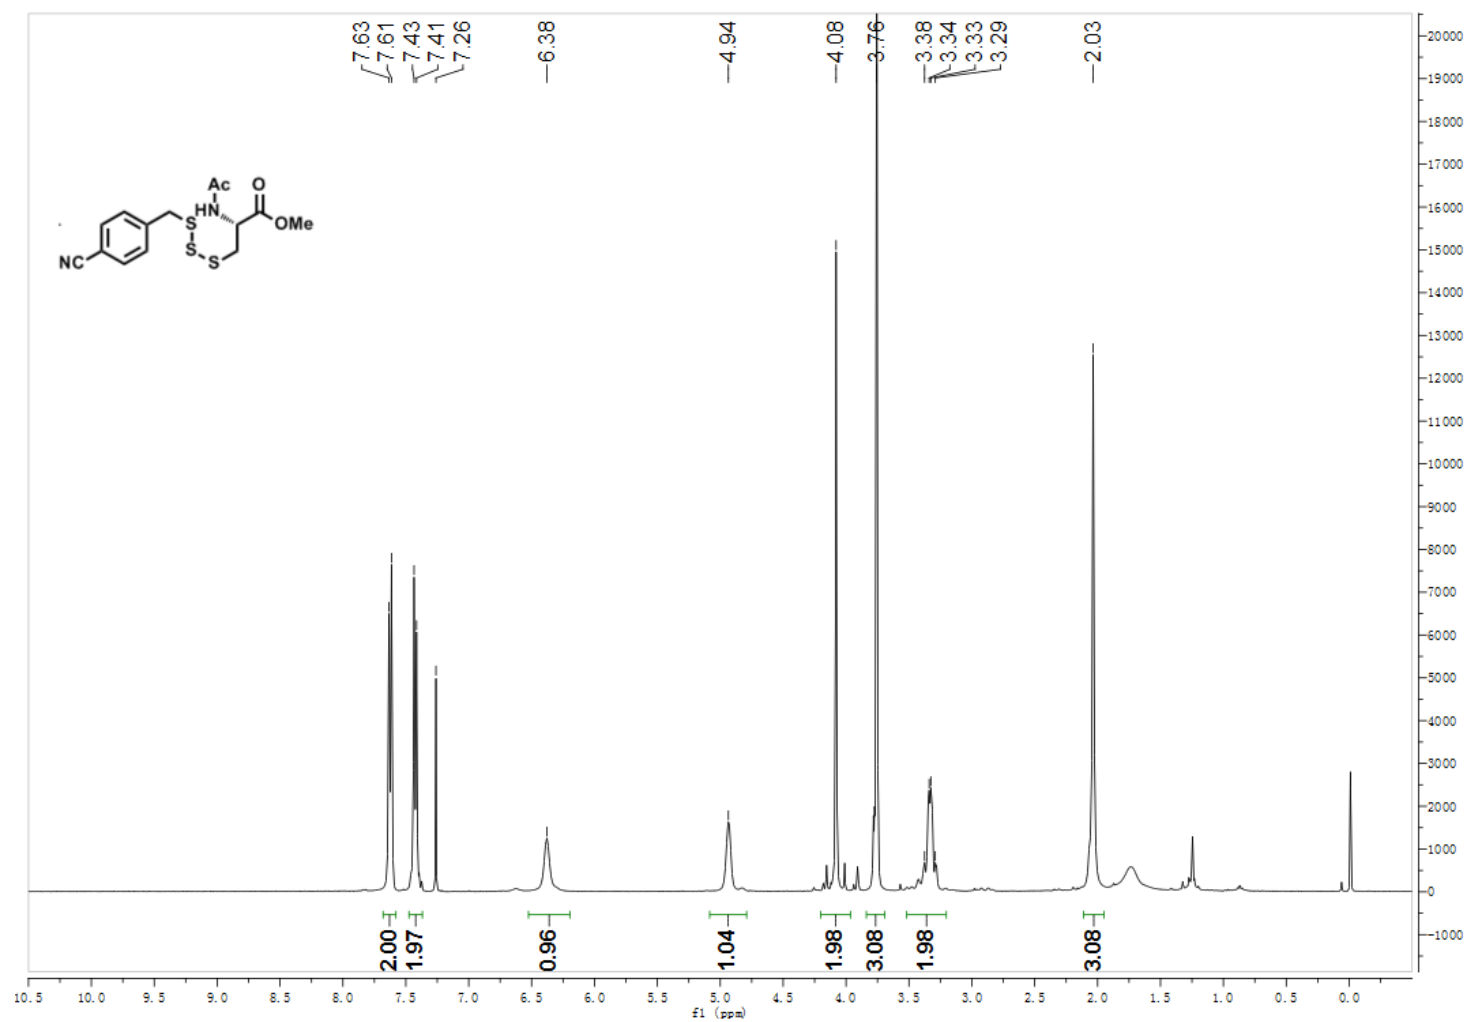

Supplementary Figure 213. <sup>1</sup>H NMR spectra for Compound 7r.

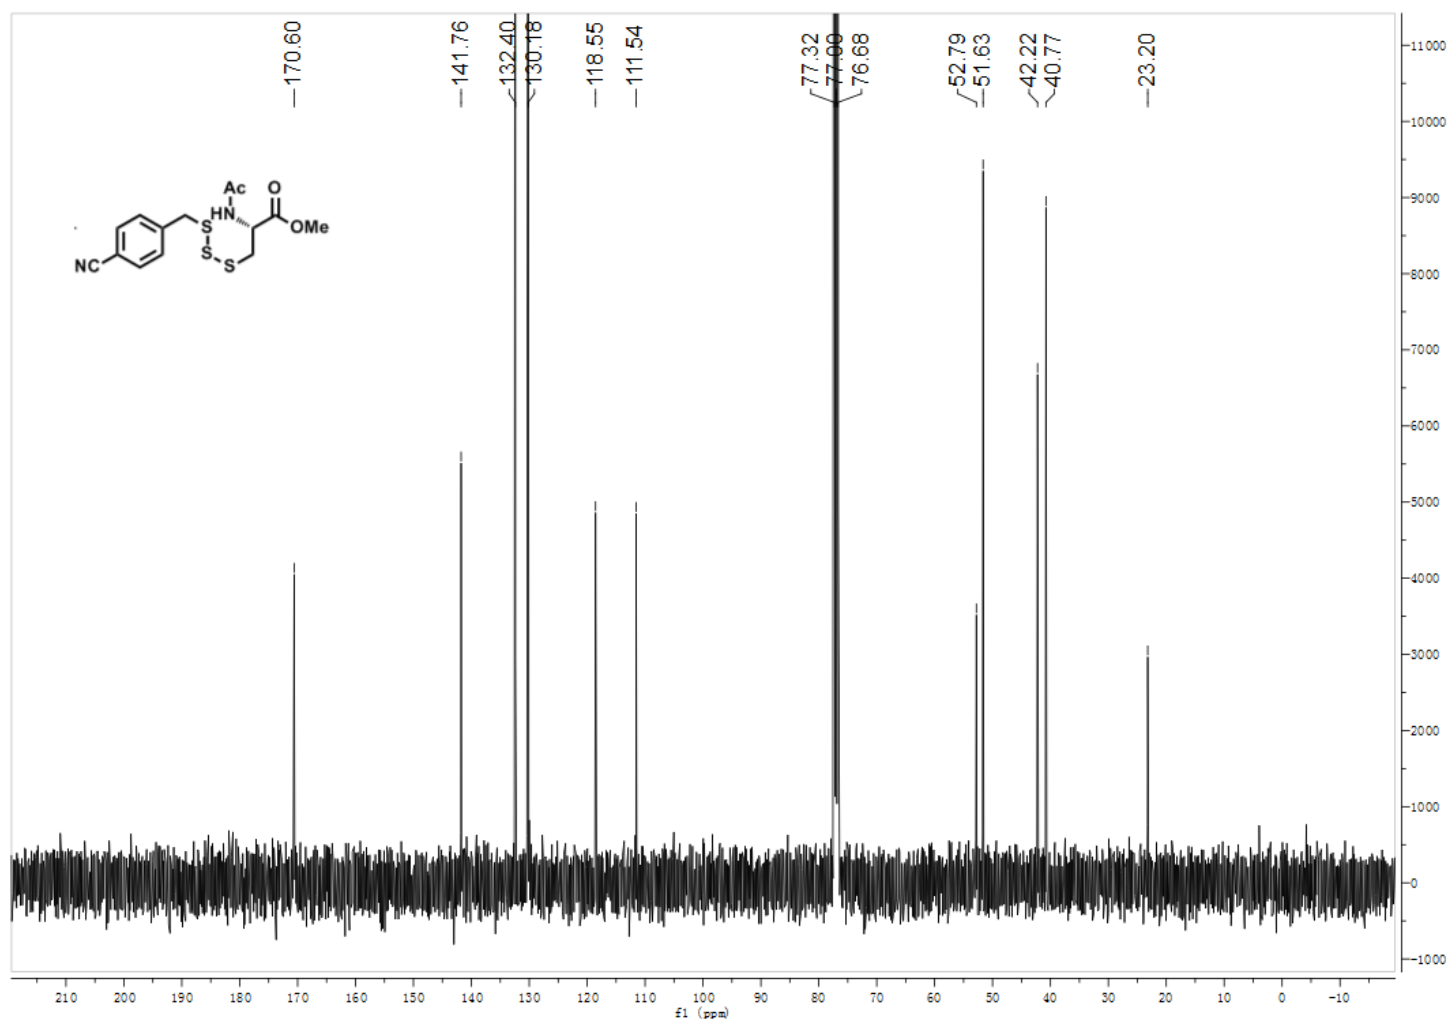

Supplementary Figure 214. <sup>13</sup>C NMR spectra for Compound 7r.

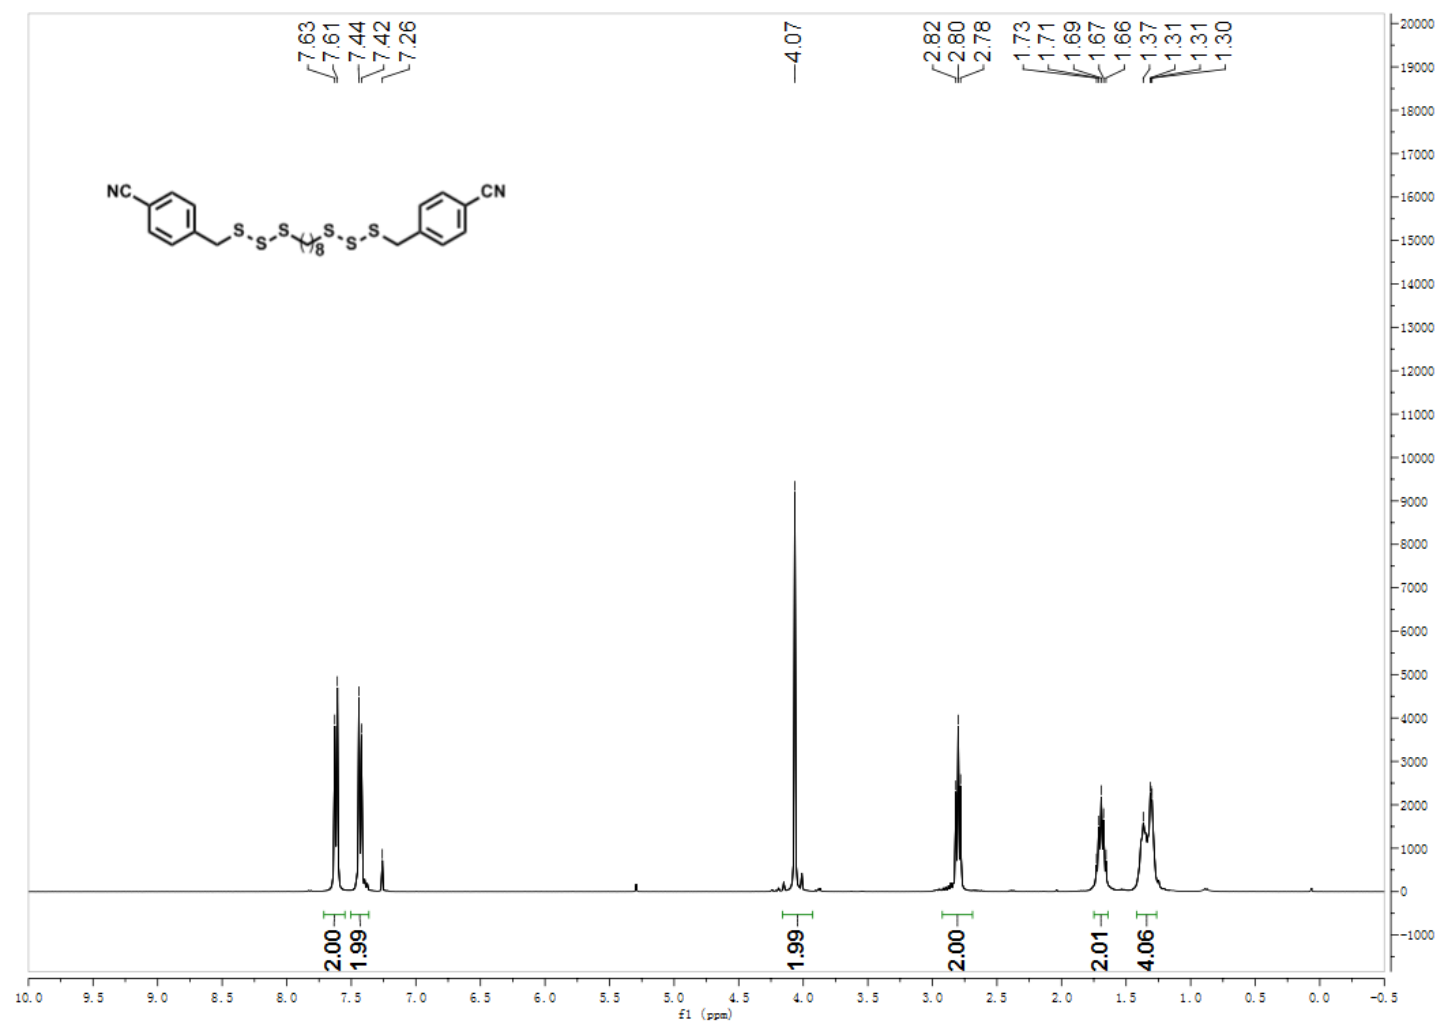

Supplementary Figure 215. <sup>1</sup>H NMR spectra for Compound 7s.

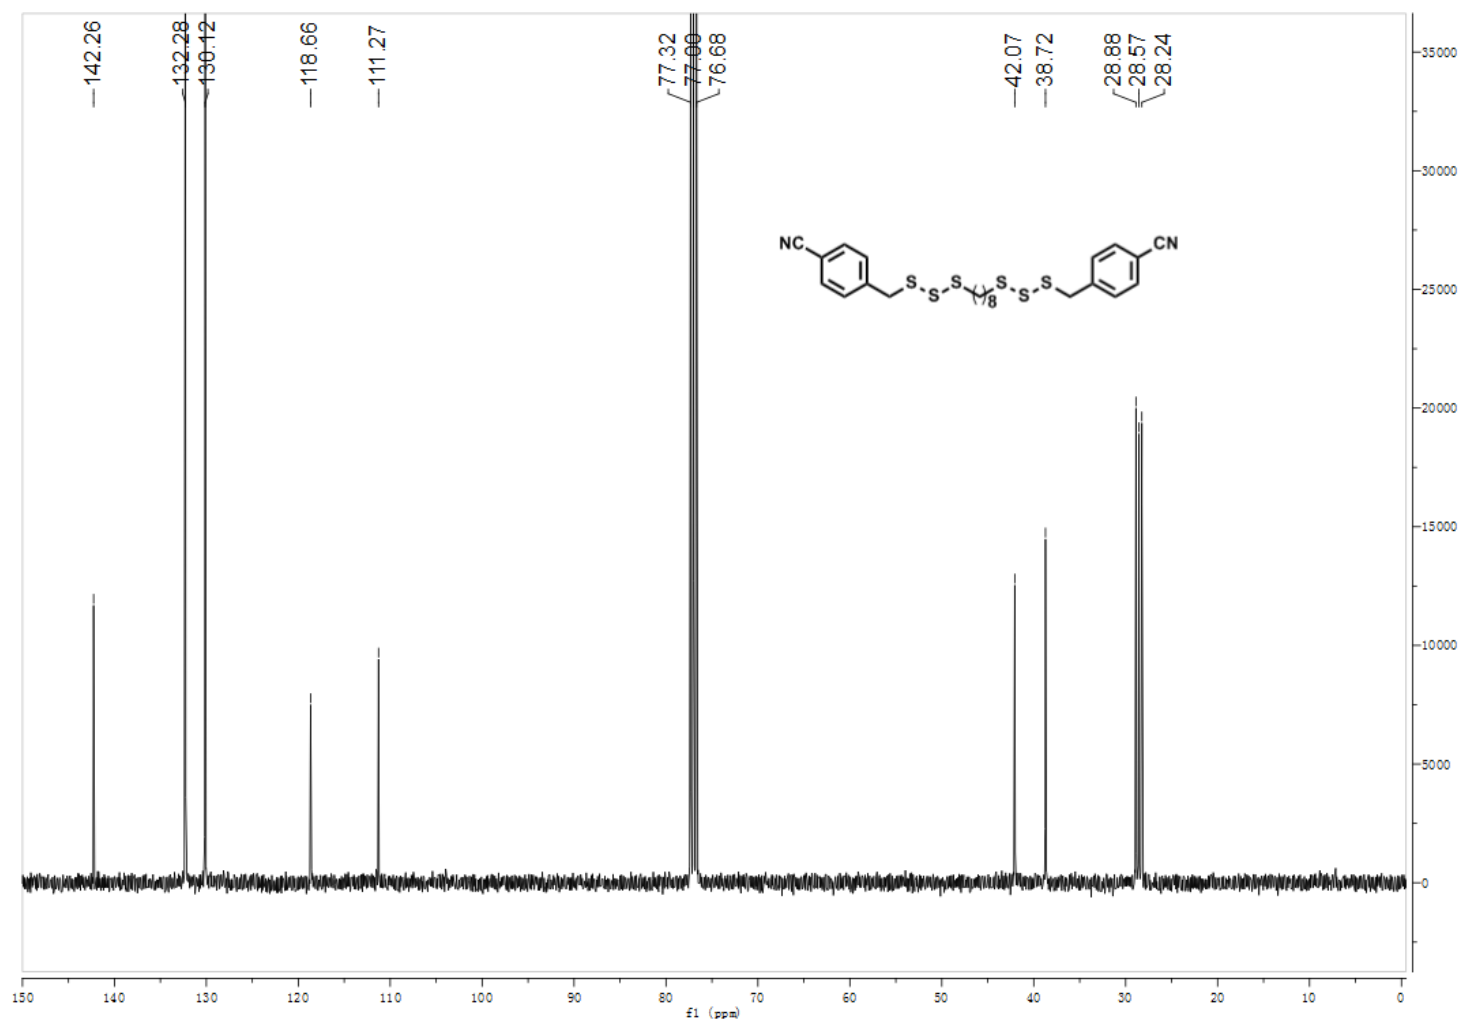

**Supplementary Figure 216.** <sup>13</sup>C NMR spectra for Compound 7s.

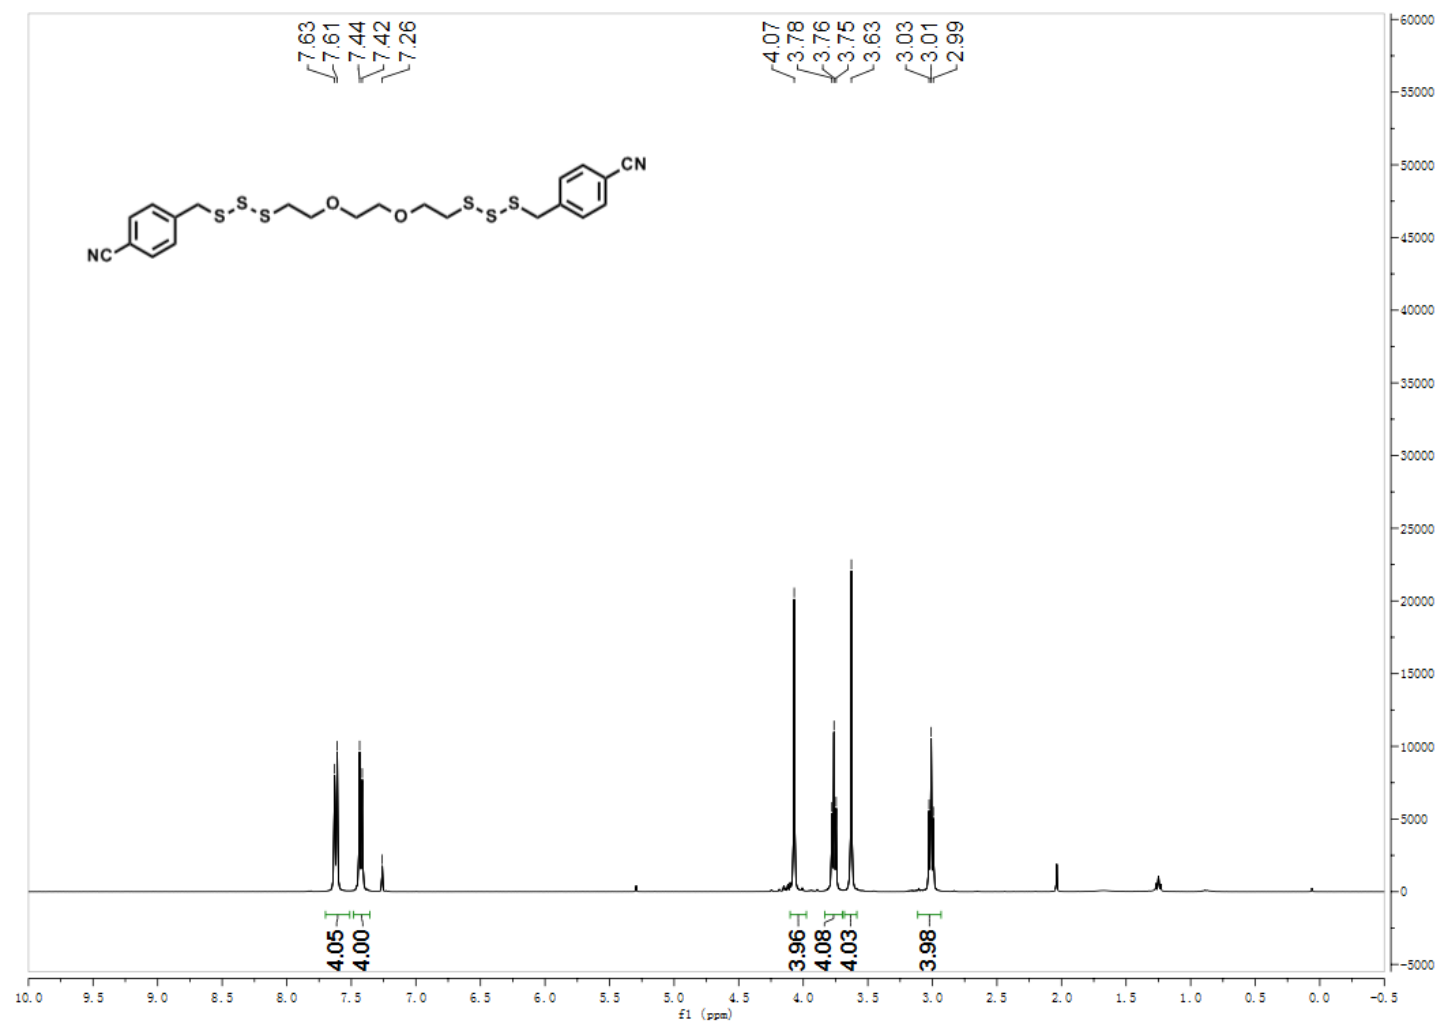

Supplementary Figure 217. <sup>1</sup>H NMR spectra for Compound 7t.

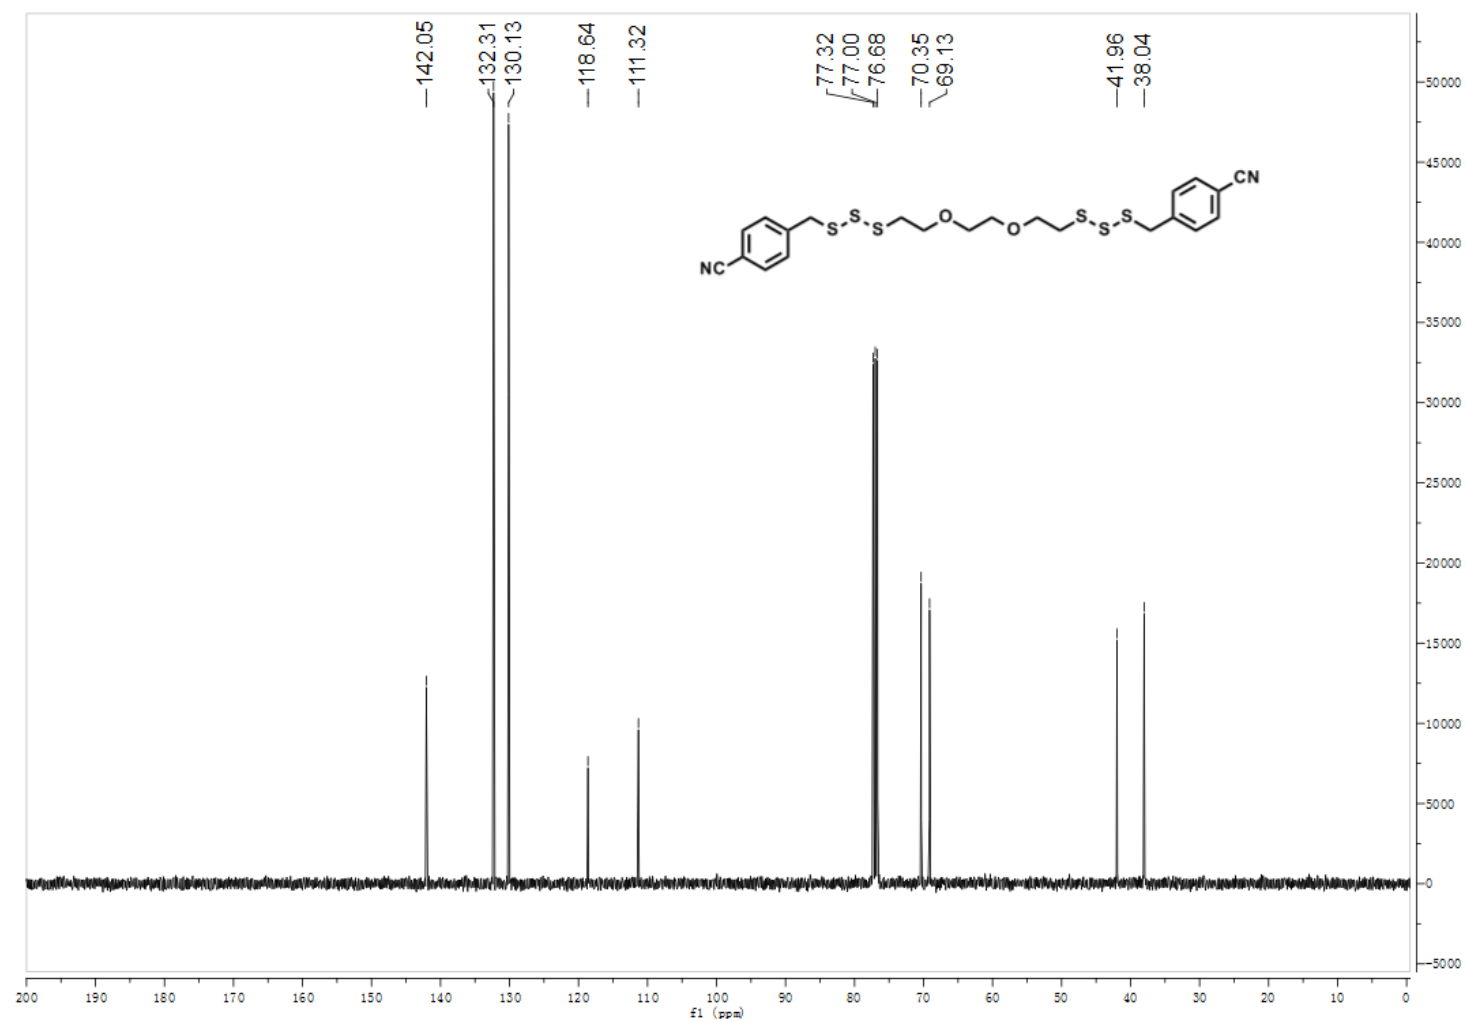

**Supplementary Figure 218.** <sup>13</sup>C NMR spectra for Compound 7t.

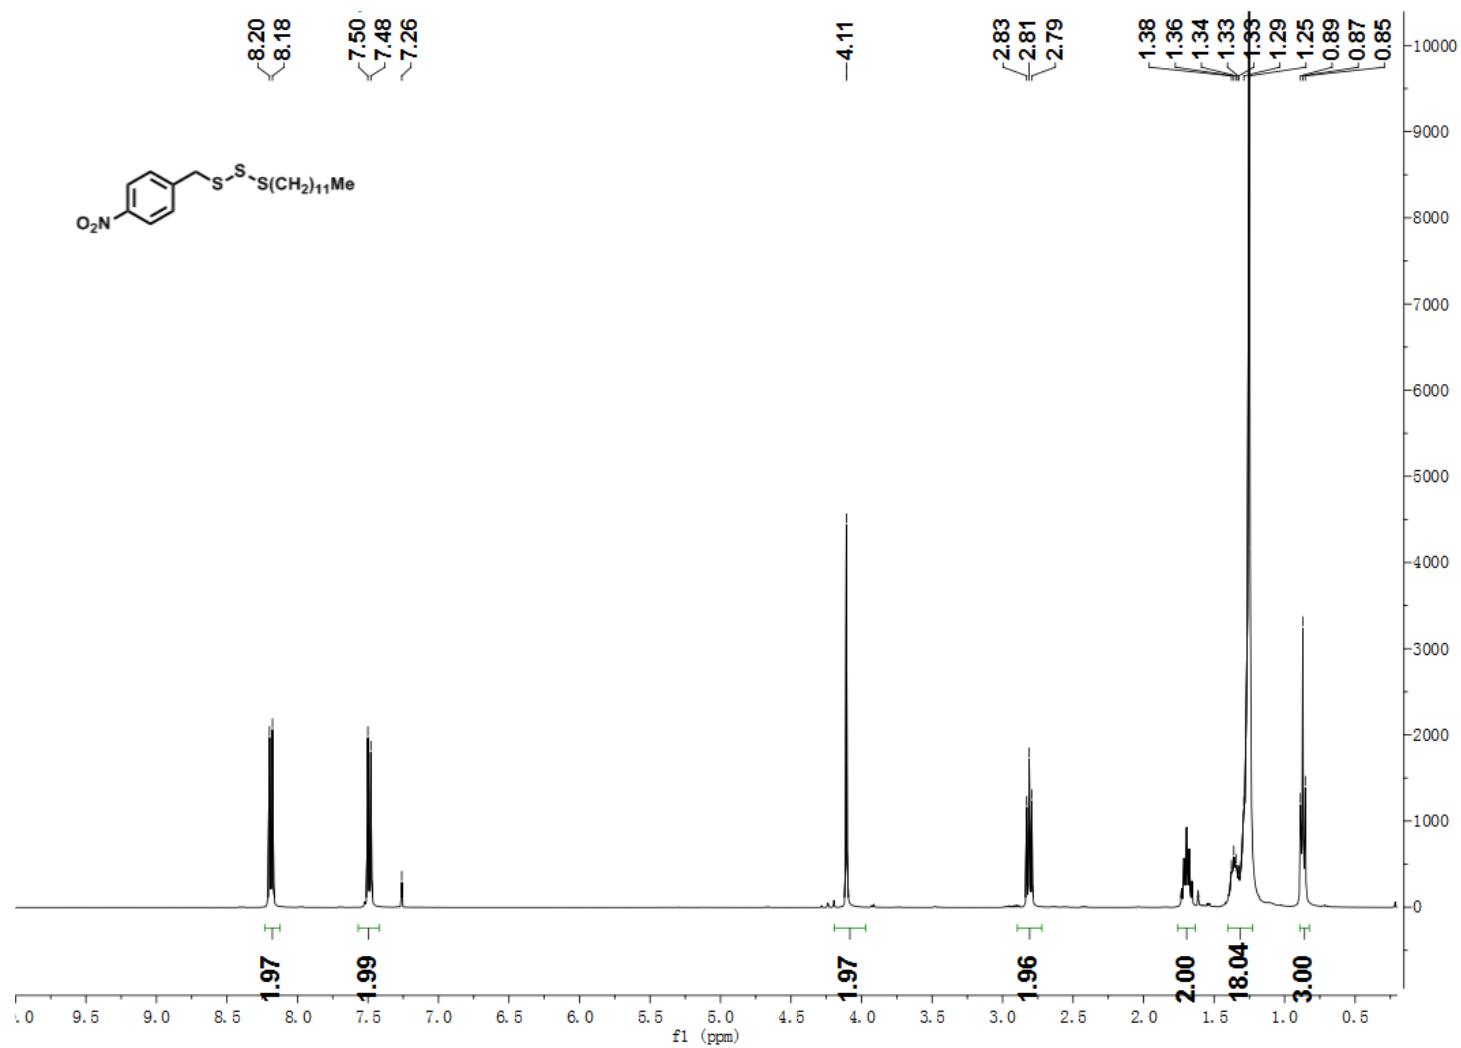

Supplementary Figure 219. <sup>1</sup>H NMR spectra for Compound 7u.

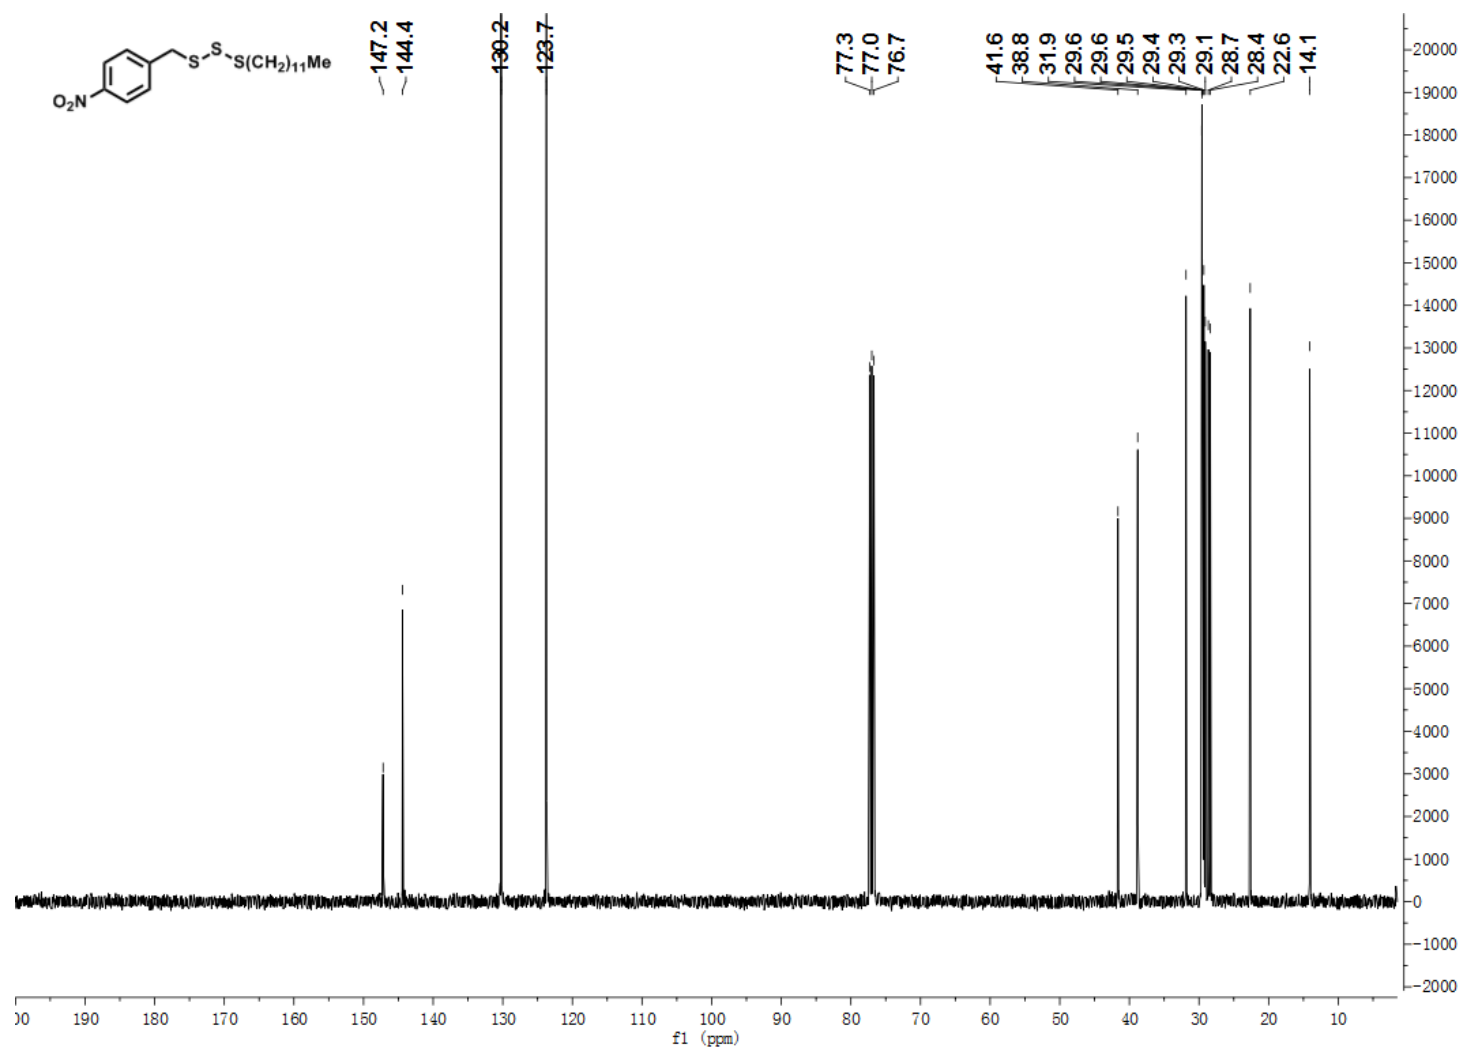

Supplementary Figure 220. <sup>13</sup>C NMR spectra for Compound 7u.

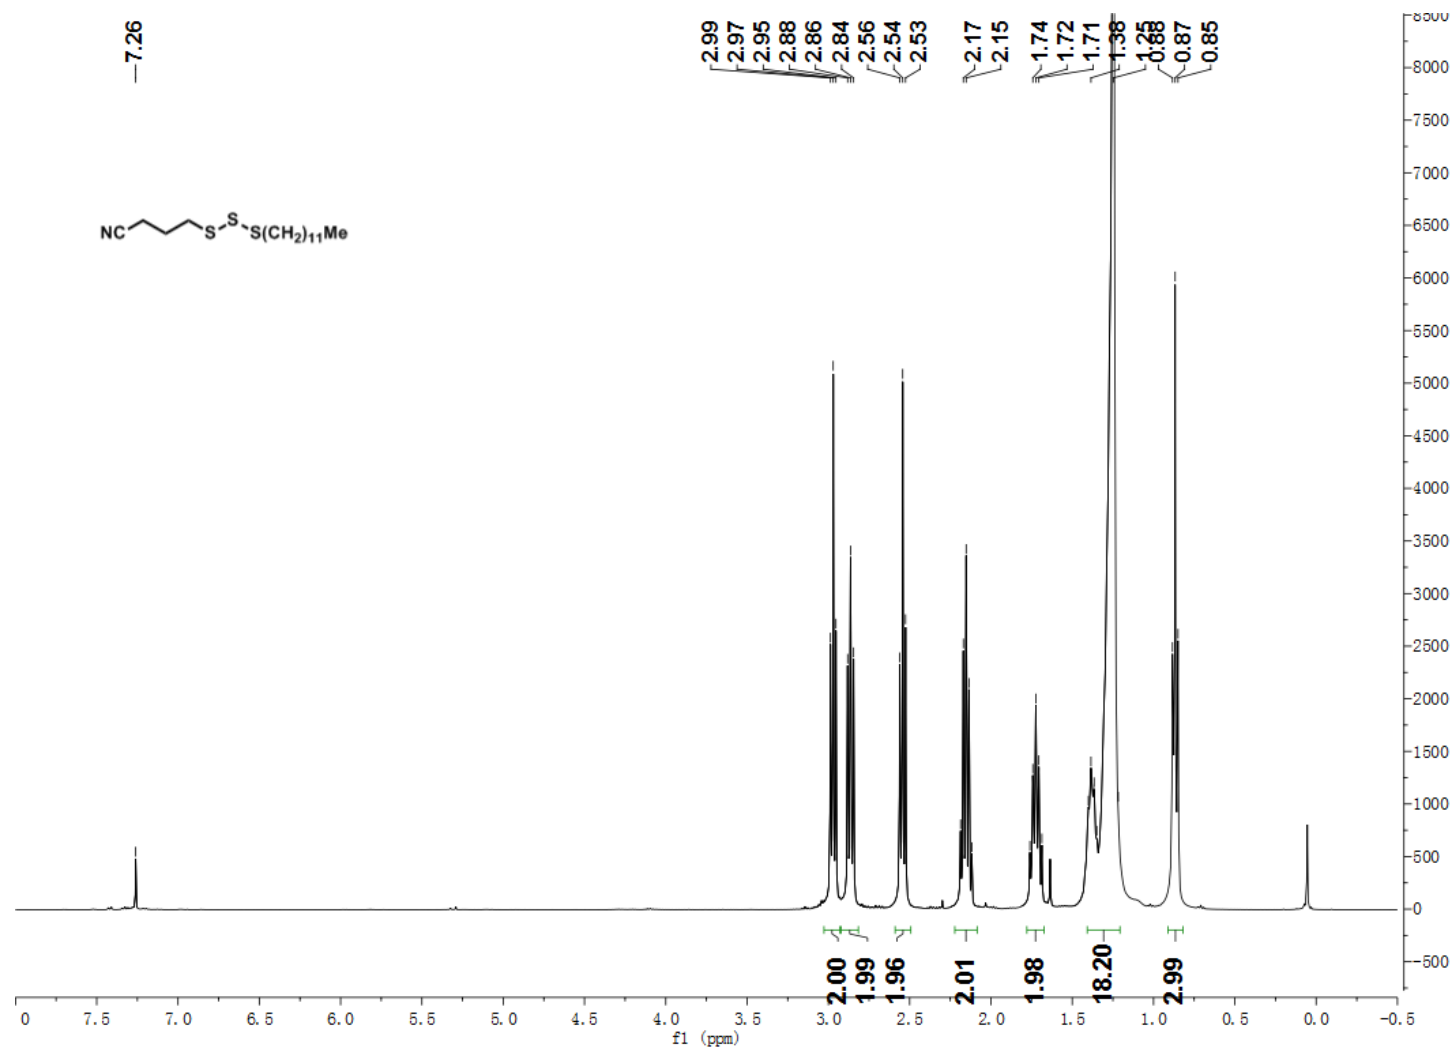

Supplementary Figure 221. <sup>1</sup>H NMR spectra for Compound 7v.

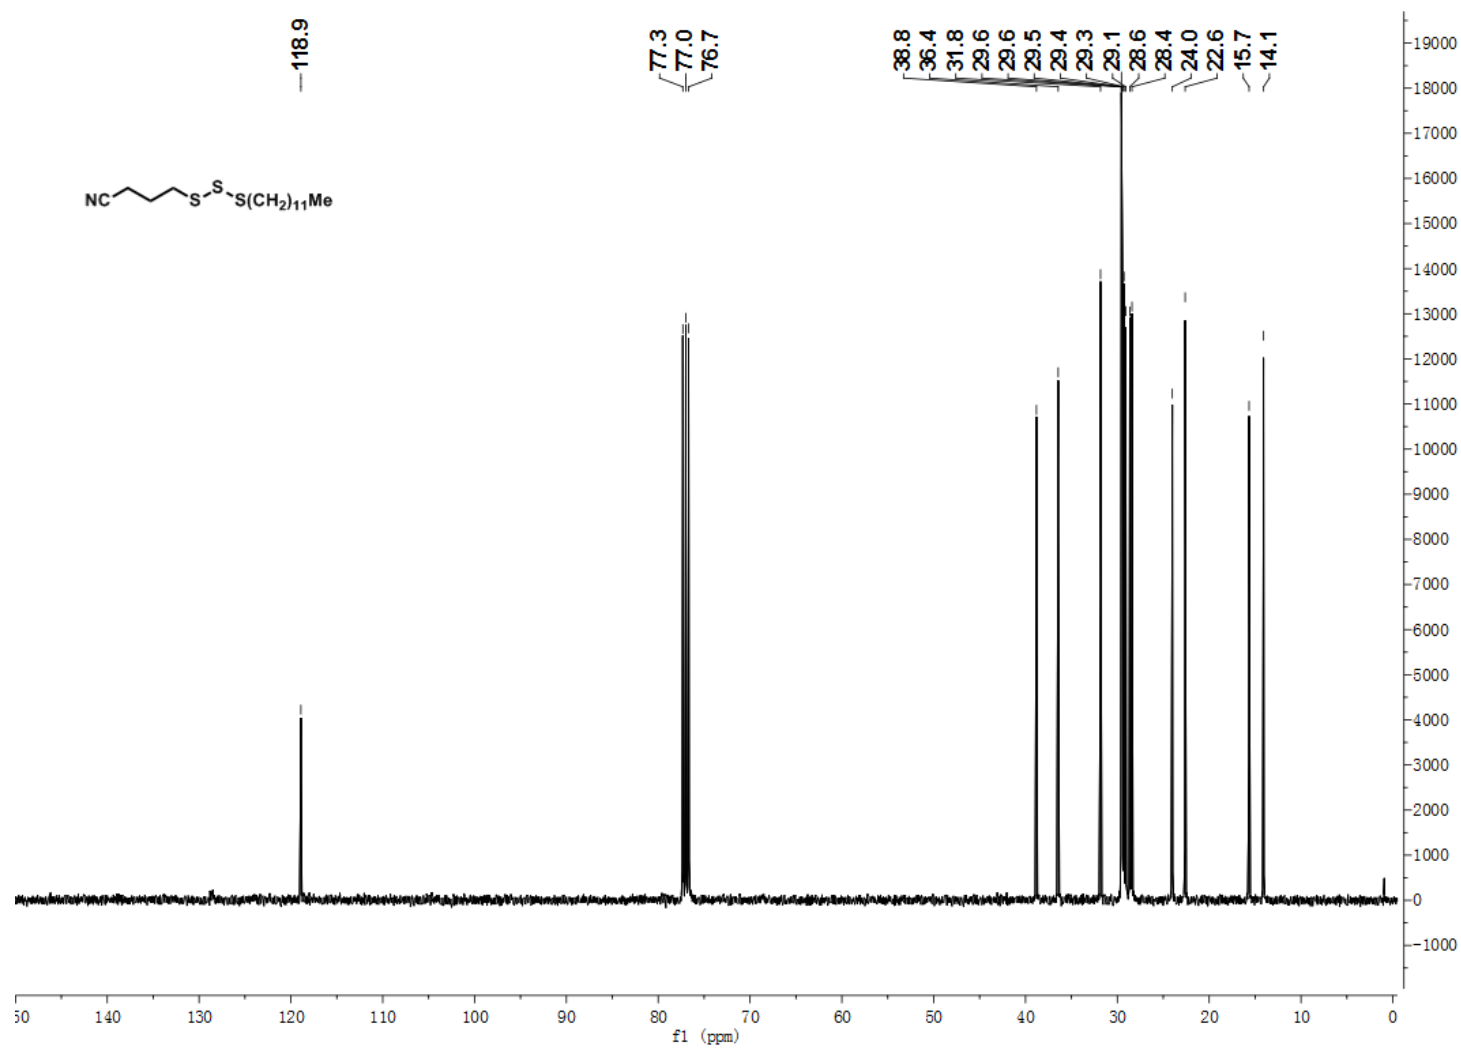

Supplementary Figure 222.  $^{13}\text{C}$  NMR spectra for Compound 7v.

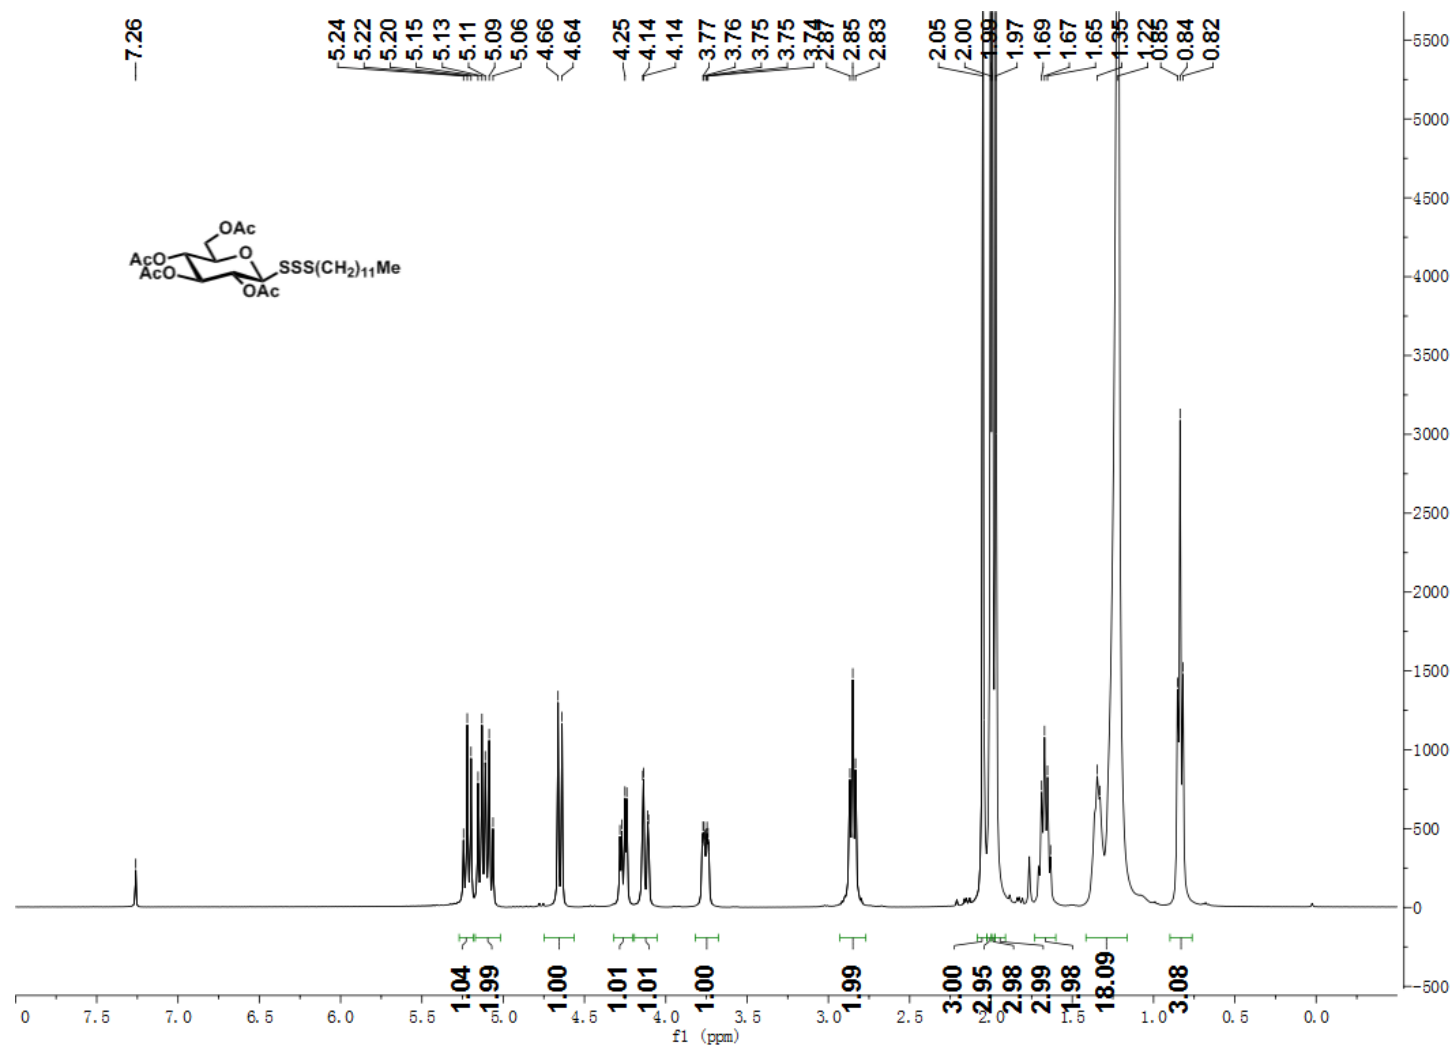

Supplementary Figure 223. <sup>1</sup>H NMR spectra for Compound 7w.

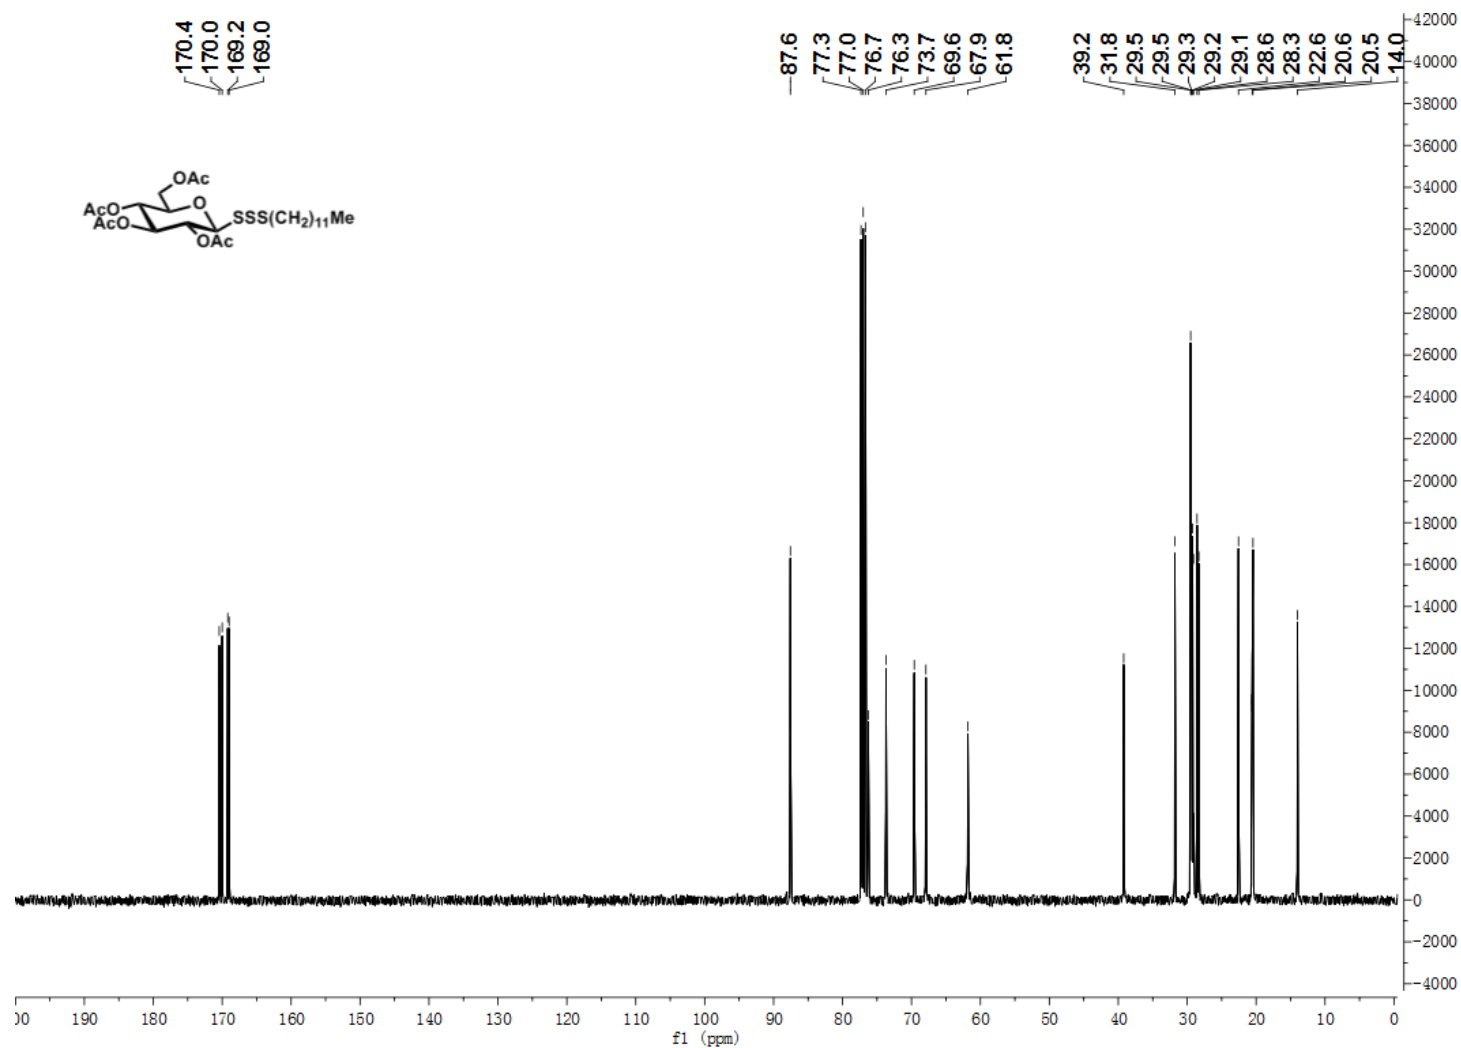

Supplementary Figure 224. <sup>13</sup>C NMR spectra for Compound 7w.



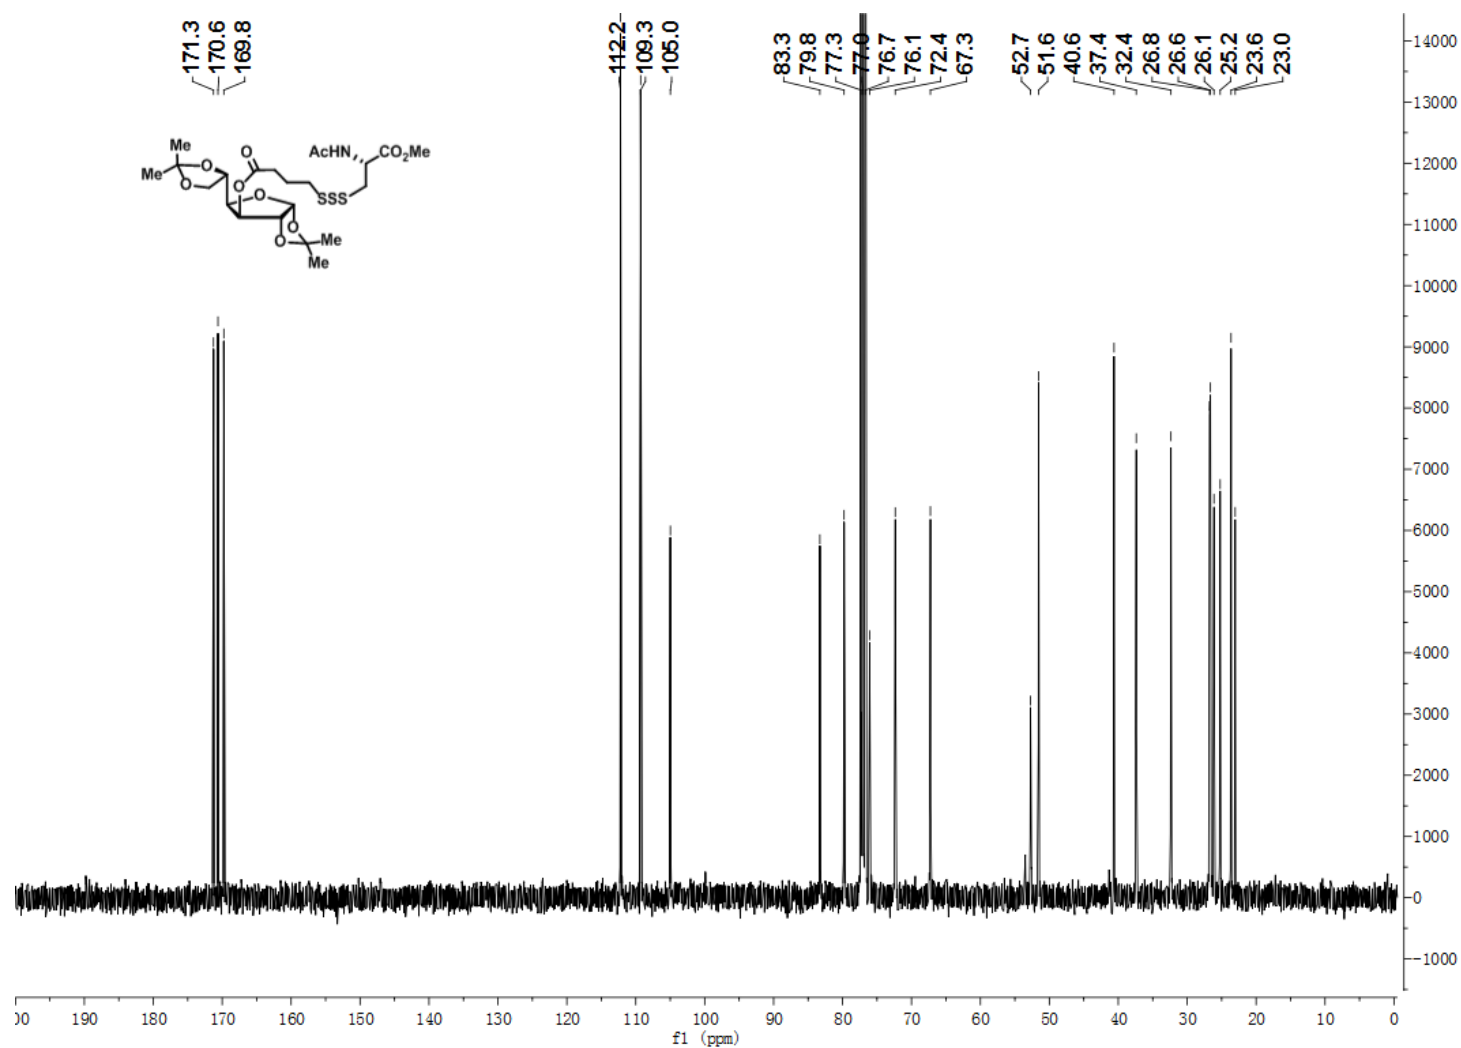

Supplementary Figure 226. <sup>13</sup>C NMR spectra for Compound 7x.

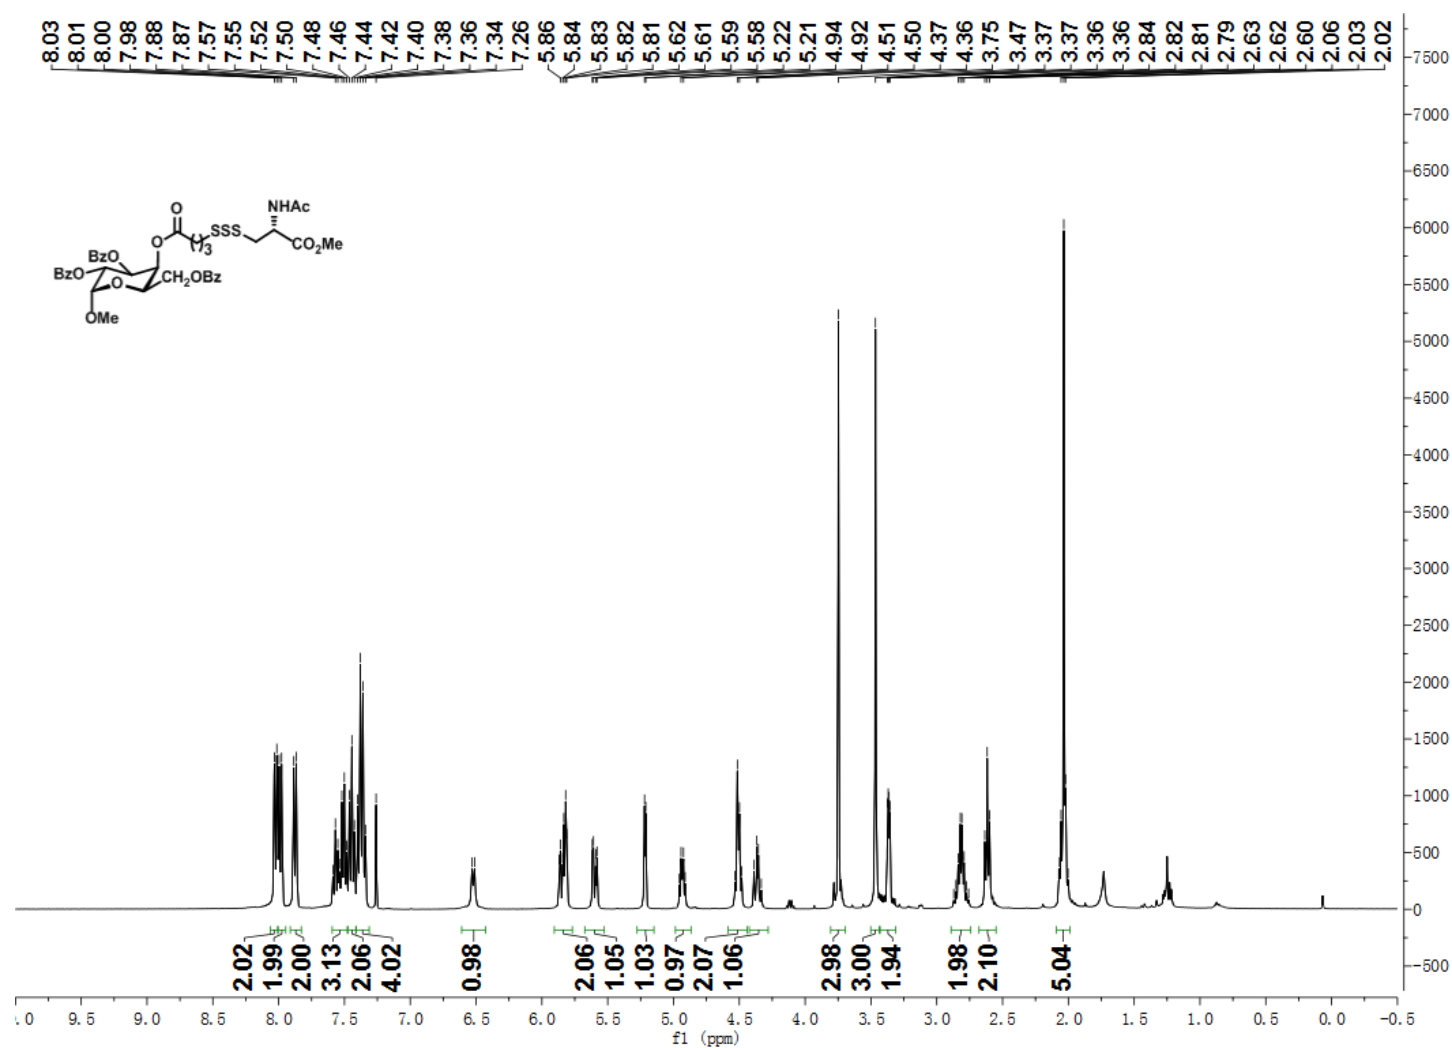

Supplementary Figure 227. <sup>1</sup>H NMR spectra for Compound 7y.

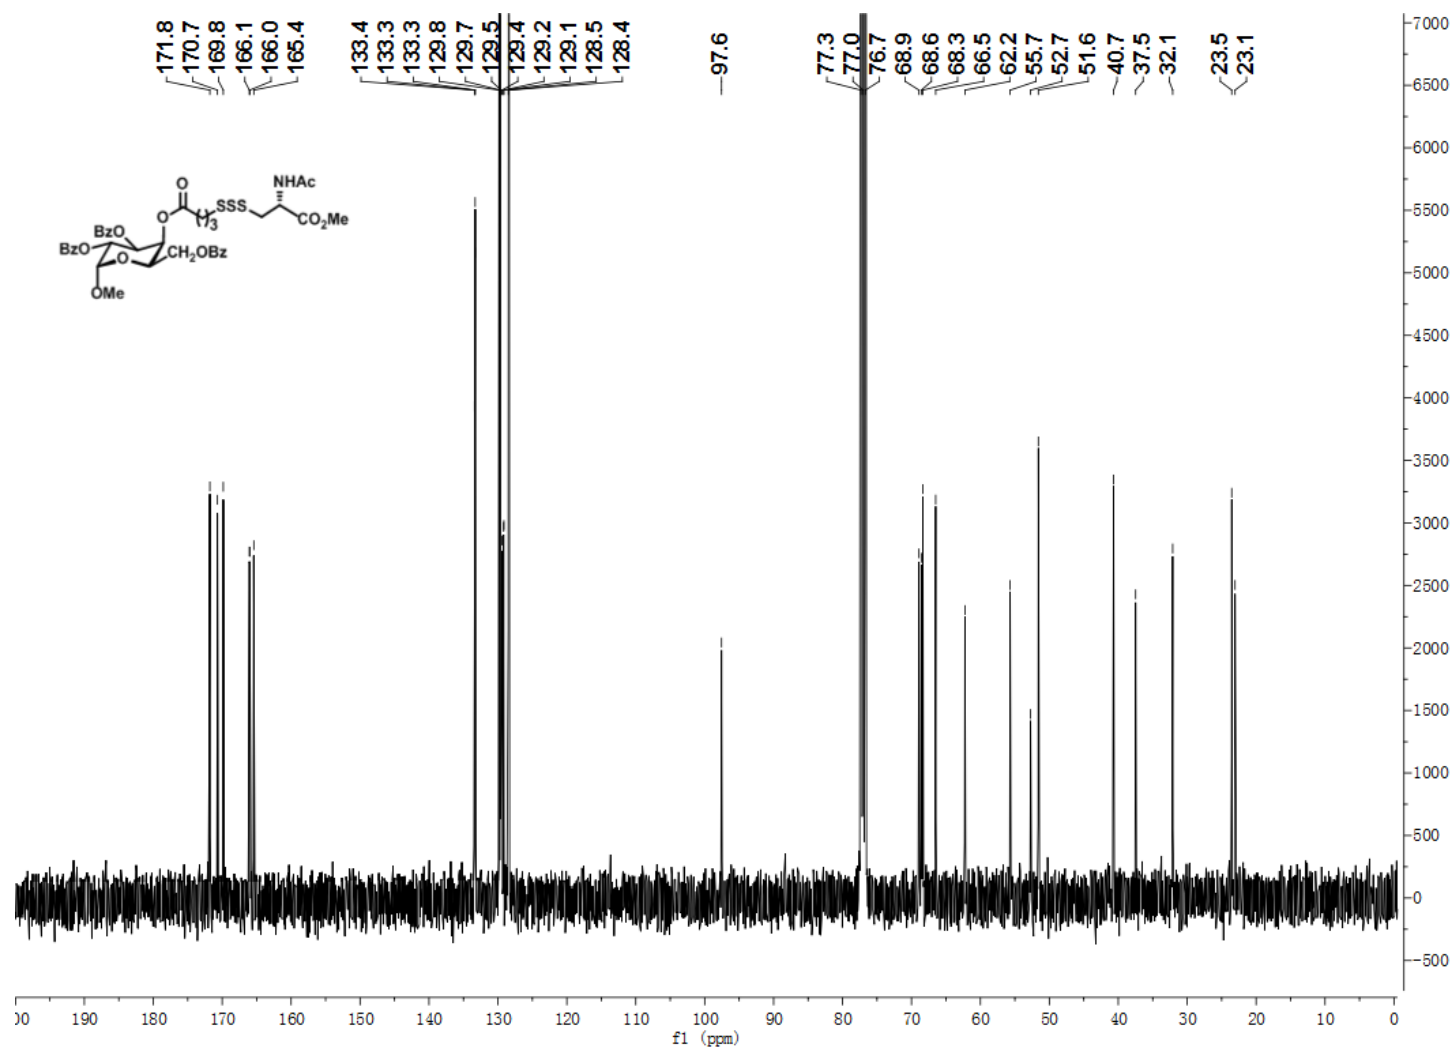

Supplementary Figure 228. <sup>13</sup>C NMR spectra for Compound 7y.

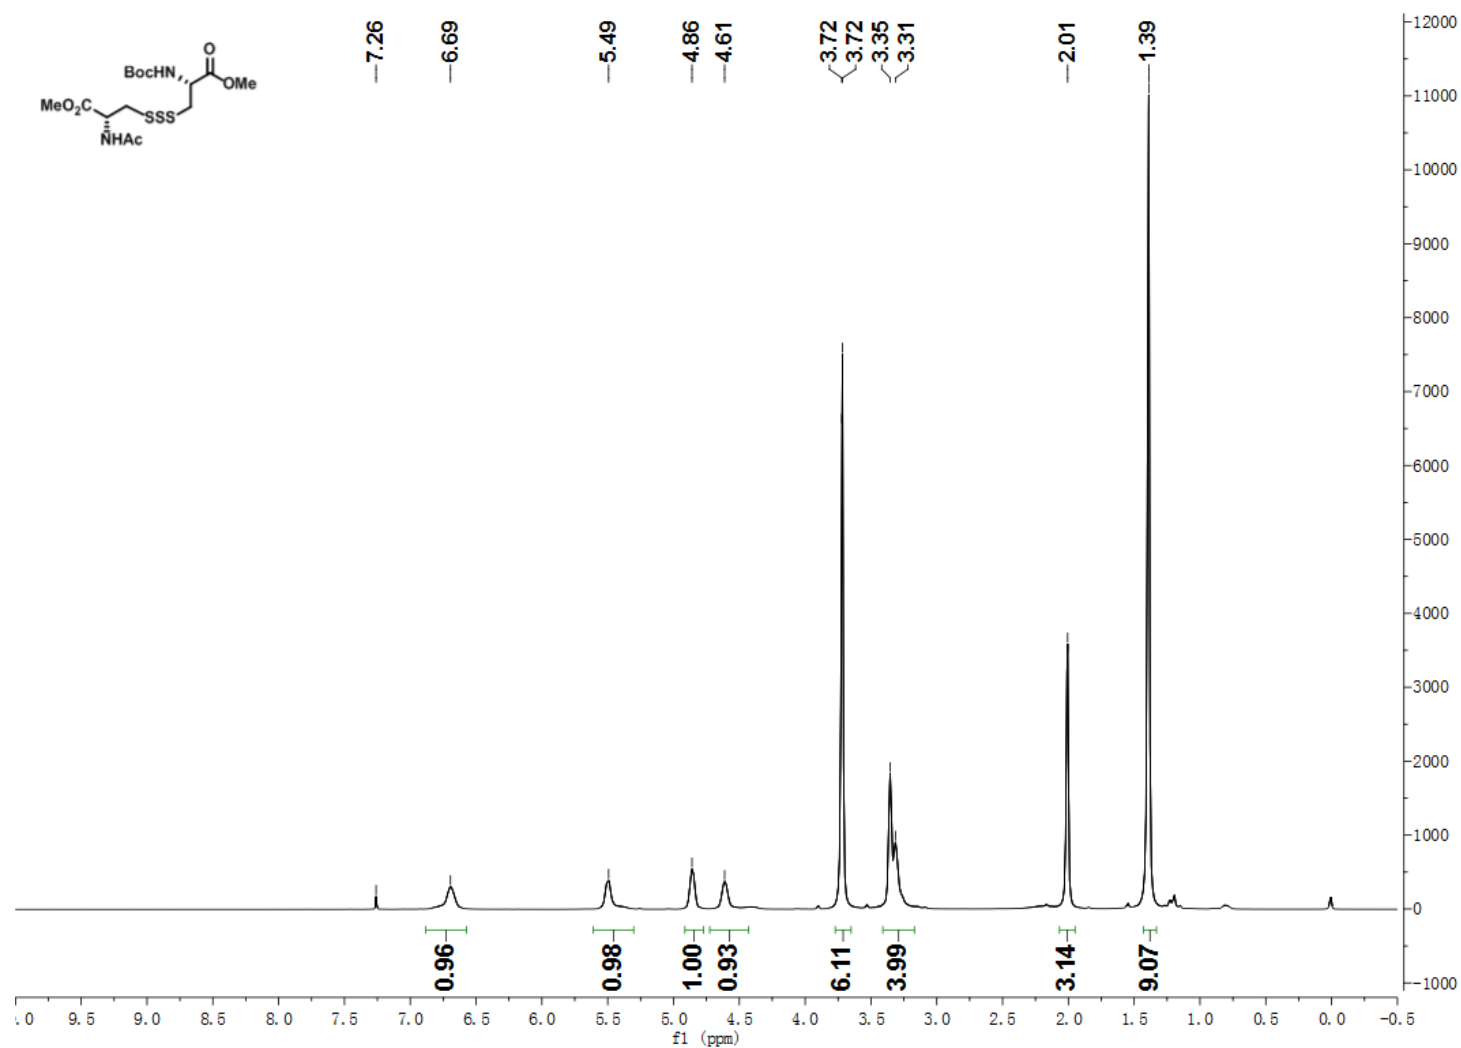

Supplementary Figure 229. <sup>1</sup>H NMR spectra for Compound 7z.

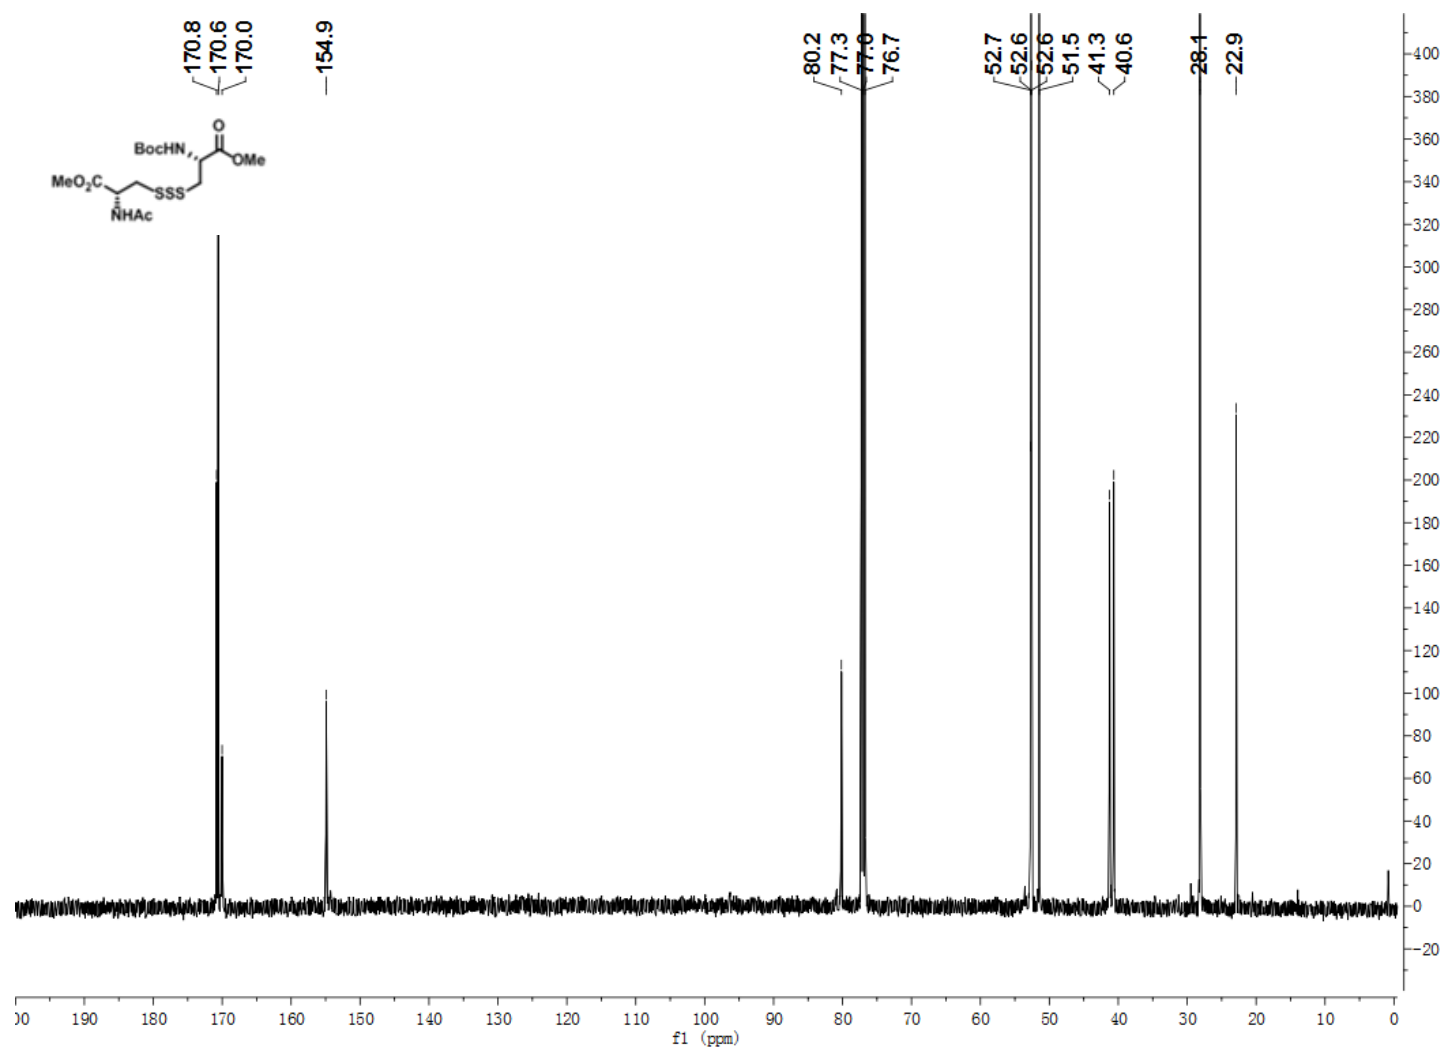

Supplementary Figure 230.  $^{13}\text{C}$  NMR spectra for Compound 7z.

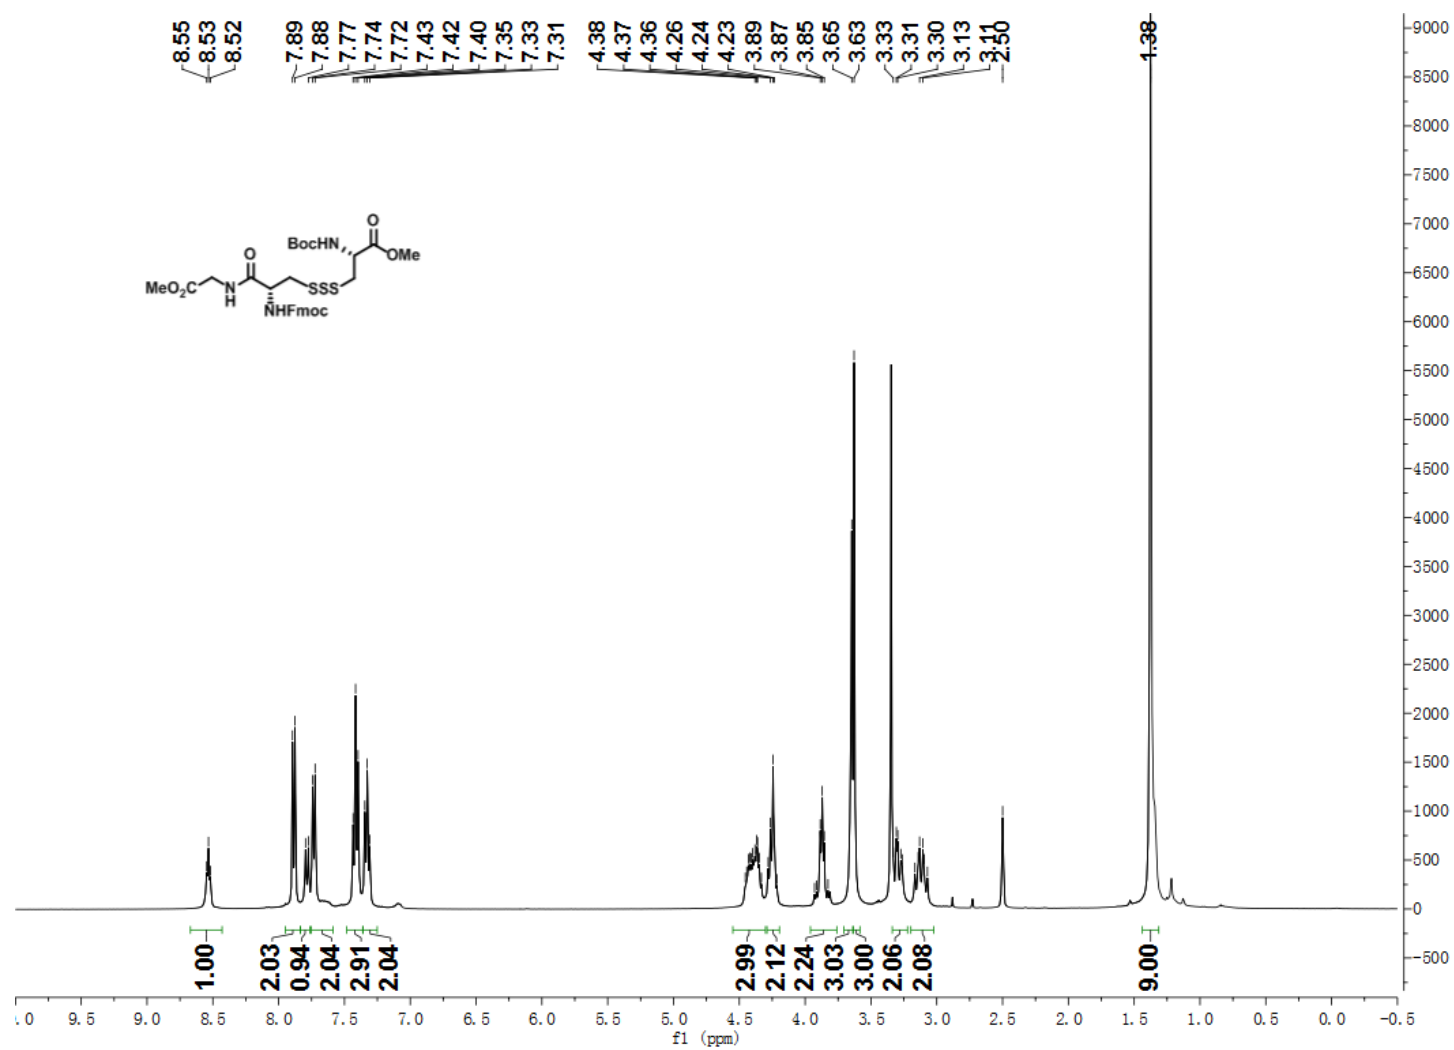

Supplementary Figure 231. <sup>1</sup>H NMR spectra for Compound 7aa.

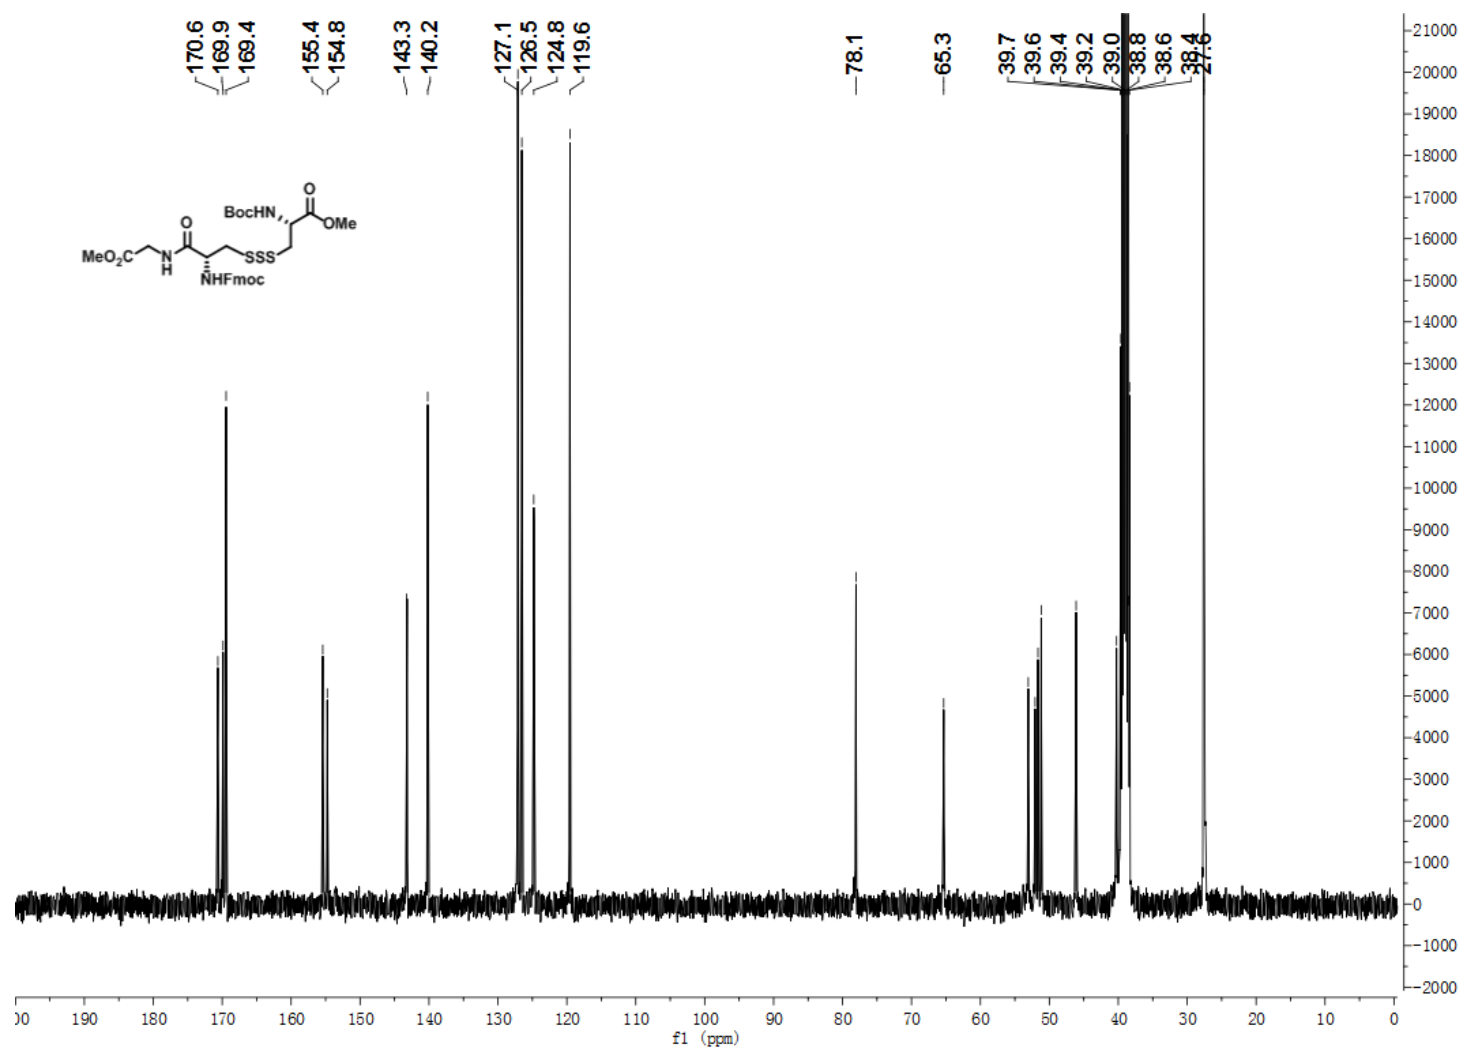

Supplementary Figure 232. <sup>13</sup>C NMR spectra for Compound 7aa.

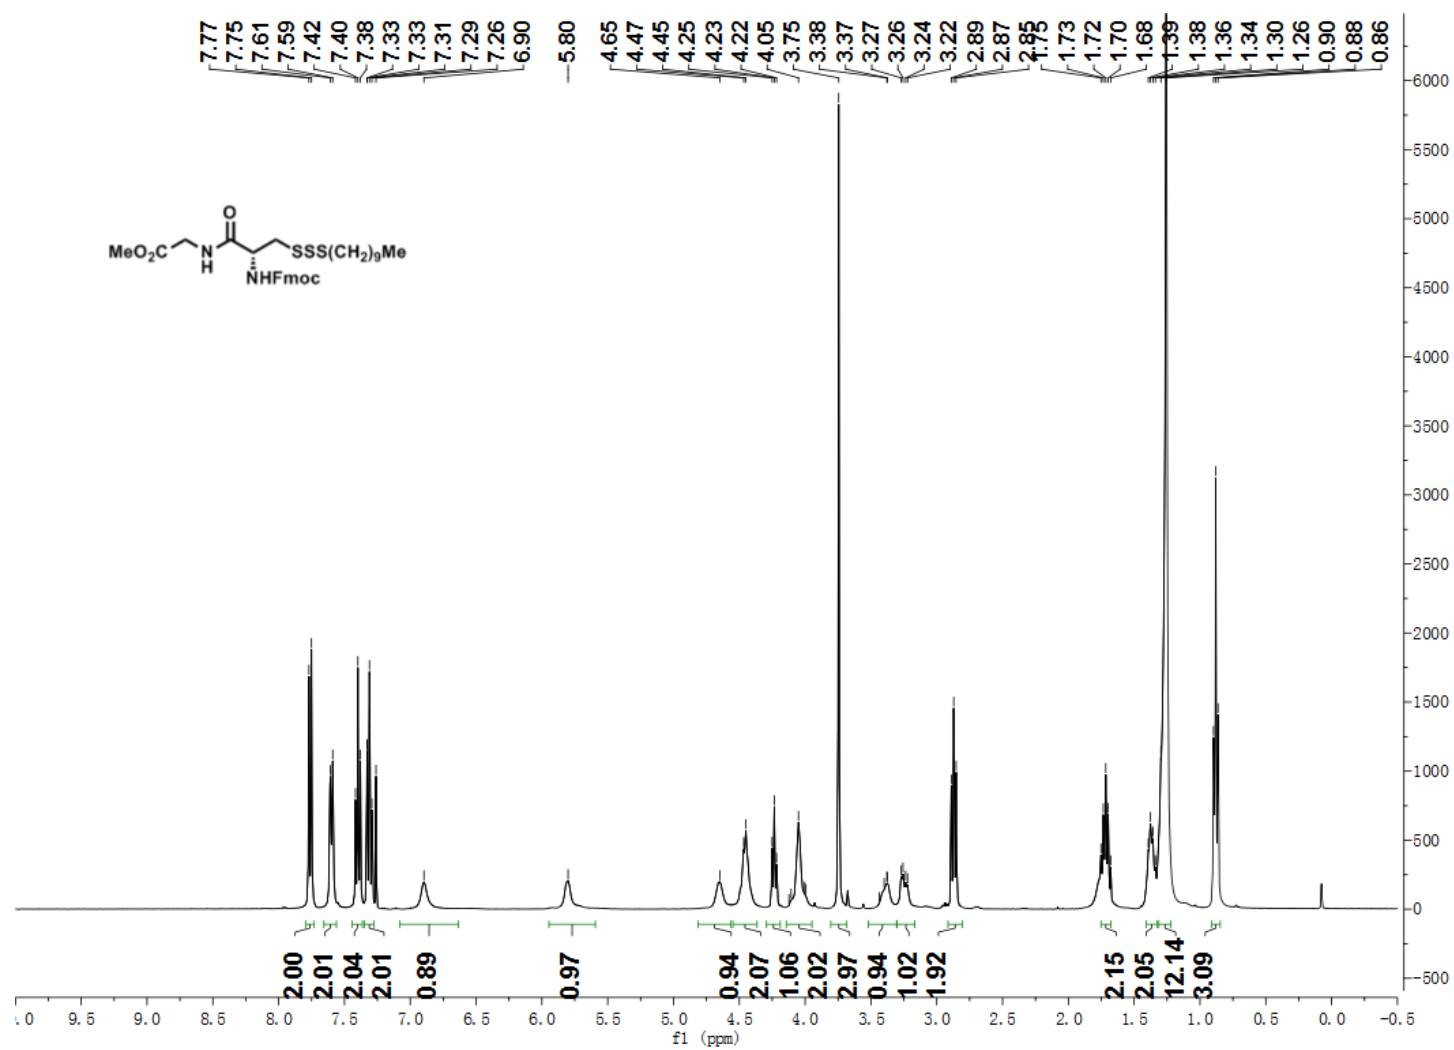

Supplementary Figure 233. <sup>1</sup>H NMR spectra for Compound 7ab.

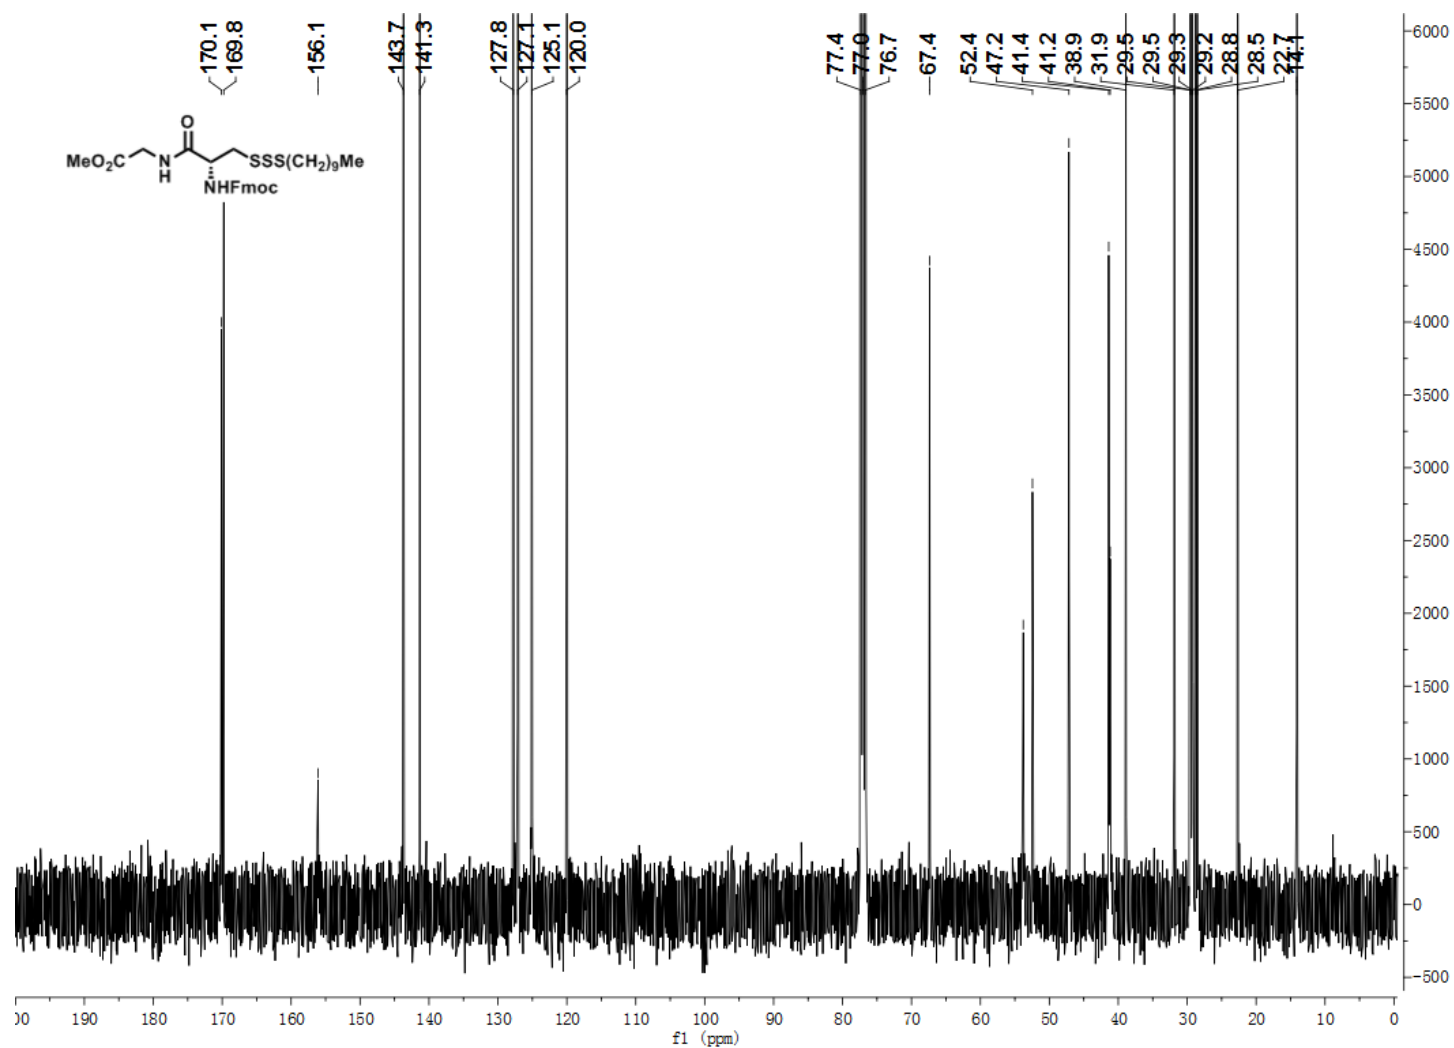

Supplementary Figure 234. <sup>13</sup>C NMR spectra for Compound 7ab.

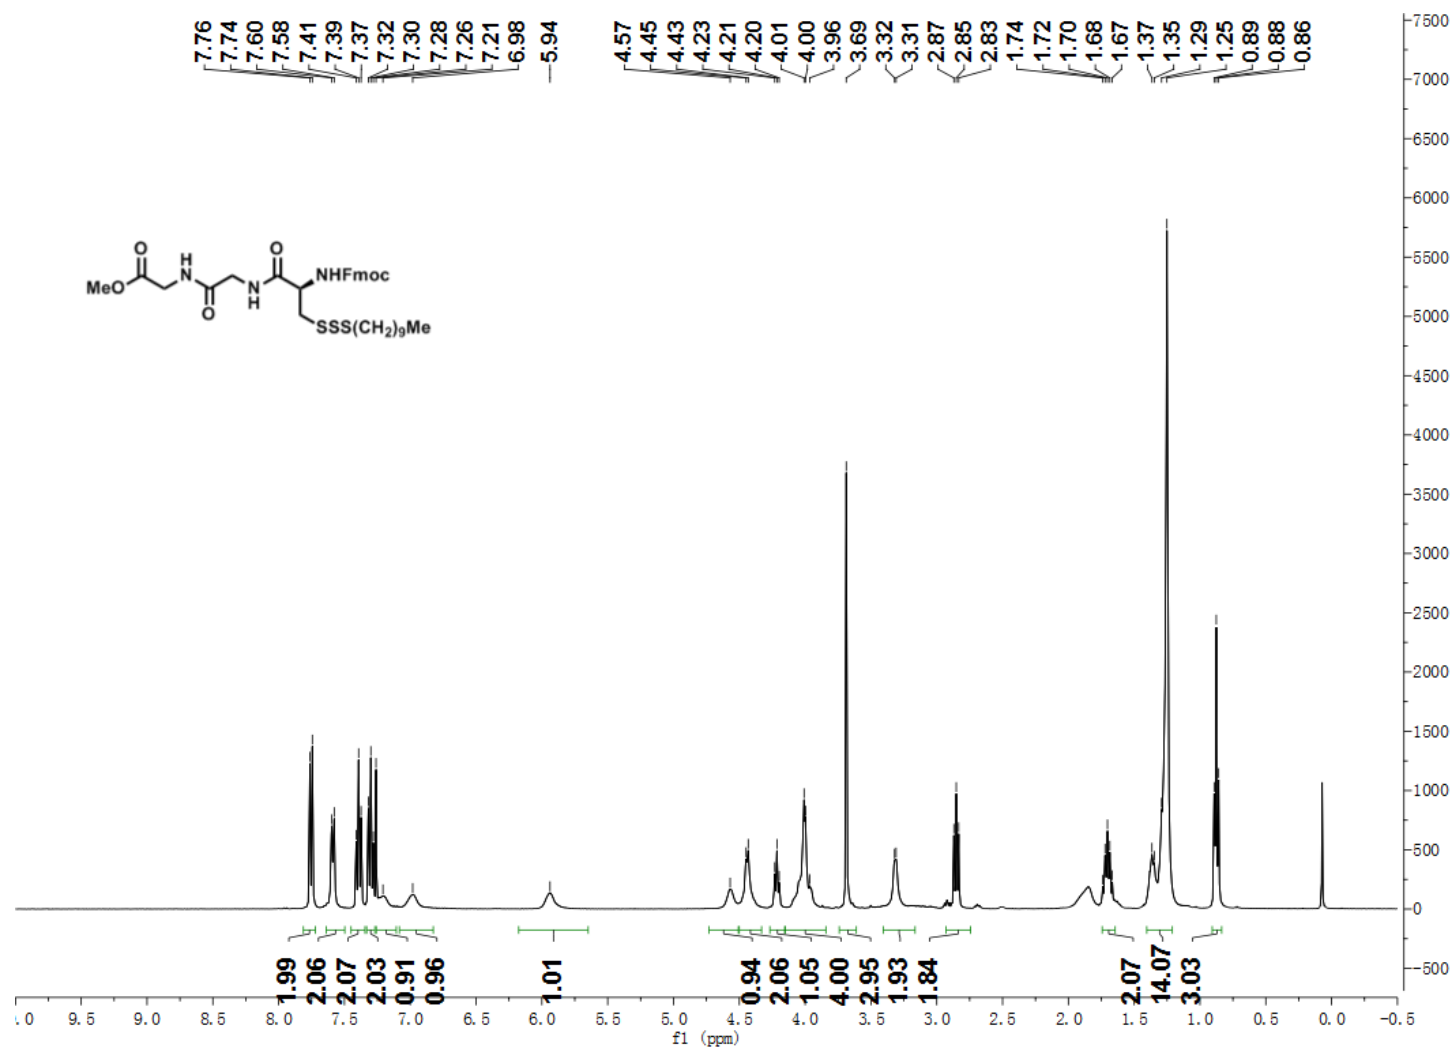

Supplementary Figure 235. <sup>1</sup>H NMR spectra for Compound 7ac.

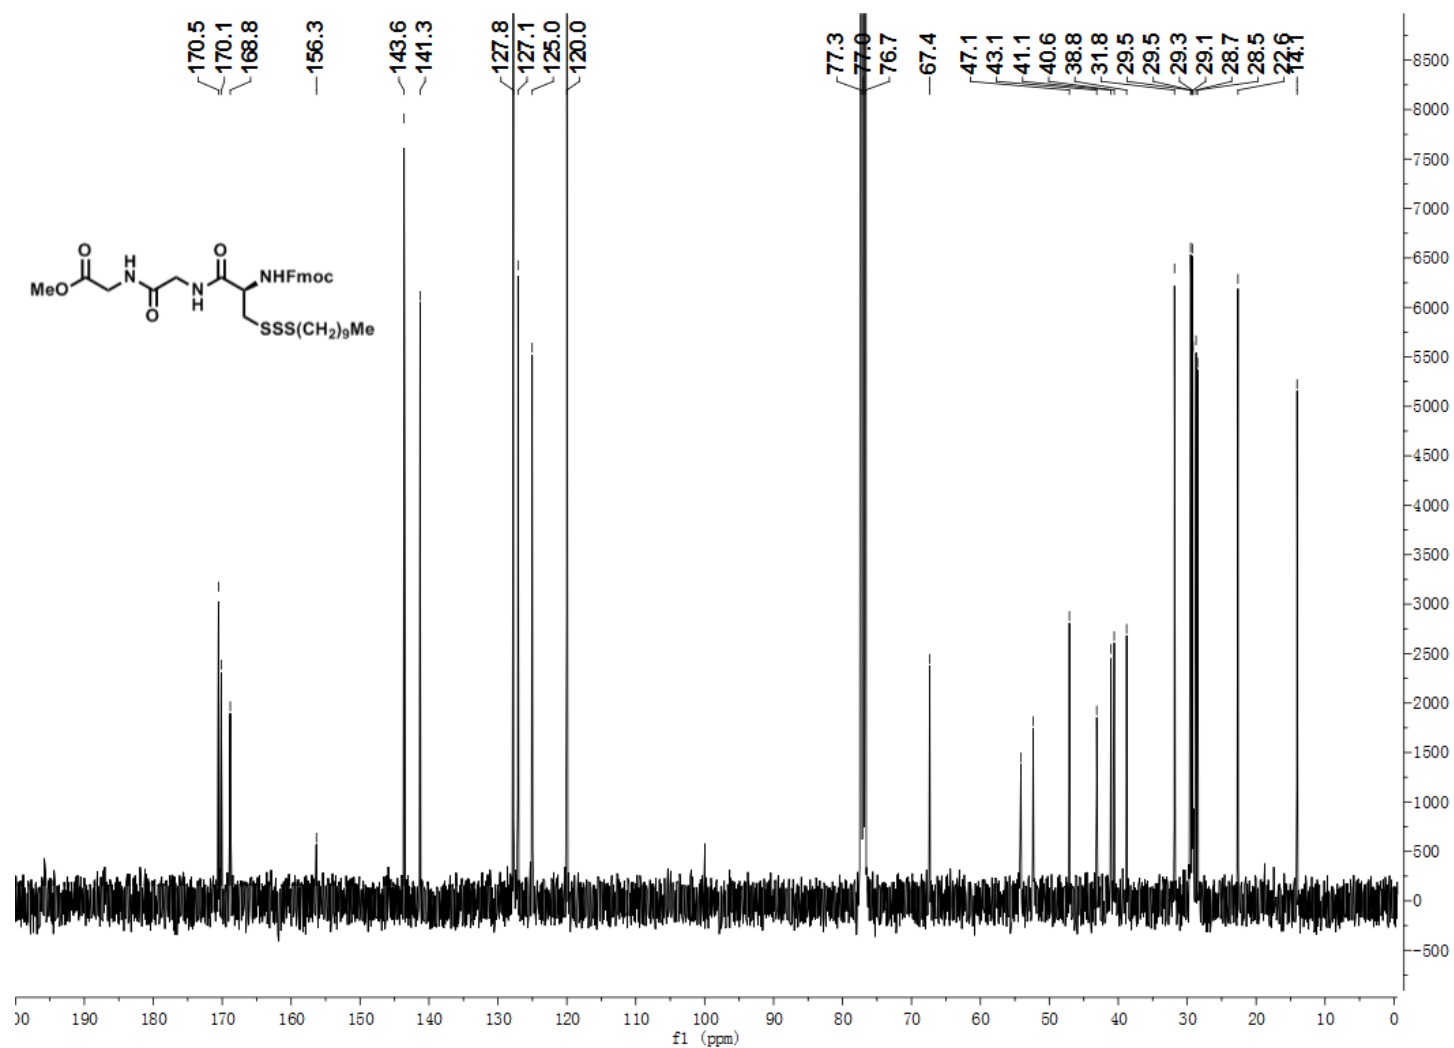

Supplementary Figure 236. <sup>13</sup>C NMR spectra for Compound 7ac.

## Supplementary References

1. Xiao, X., Feng, M. & Jiang, X. New design of disulfurating reagent: facile and straightforward pathway to unsymmetrical disulfanes via Cu-catalyzed oxidative cross coupling. *Angew. Chem. Int. Ed.*, **55**, 14121-14121 (2016).
2. Fiori, K. W. & Bois, J. D. Catalytic intermolecular amination of C-H bonds: Method development and mechanistic Insights. *J. Am. Chem. Soc.*, **129**, 526-568 (2007).
3. Stang, P. J., Boehshar, M., Wingert, H. & Kitamura, T. Acetylenic esters. Preparation and characterization of alkynyl carboxylates via polyvalent iodonium species. *J. Am. Chem. Soc.*, **110**, 3272-3278 (1988).
